# Supplementary material for: Extracellular electron transfer increases fermentation in lactic acid bacteria via a hybrid metabolism
Source: eLife. 2022 Feb 11;11:e70684. doi: 10.7554/eLife.70684 (PMC8837199; doi:10.7554/eLife.70684)
Supplement: Figure 1—figure supplement 1—source data 1. [file elife-70684-fig1-figsupp1-data1.xlsx]

## Sheet: Panel B
Iron redution by L. plantarum in the presence of riboflavin.
uM Riboflavin	[Fe+2] (mM)
0	0.085468	0.087258	0.091496
0.5	0.295544	0.298394	0.305481
1	0.392654	0.388124	0.397623
1.5	0.427143	0.425682	0.433719
2	0.452279	0.438396	0.459294
2.5	0.449625	0.430097	0.444272
5	0.506966	0.480495	0.480929
10	0.532424	0.509859	0.522588
20	0.550313	0.549879	0.540332

## Sheet: Panel C
Iron reduction by L. plantarum after growth in different culture media.
Group	gMRS + DHNA	gMRS	mMRS + DHNA	mMRS	gCDM + DHNA	gCDM	mCDM + DHNA	mCDM
[Fe2+] (mM)	0.063909	0	0.087156	0	0.121103	0	0.081418	0
	0.047891	0	0.084128	0	0.085646	0	0.073168	0
	0.068732	0	0.088142	0	0.041977	0	0.079108	0

## Sheet: Panel D
Iron reduction by L. plantarum after growth in mMRS with supplementation of DHNA and iron.
Group	mMRS	DHNA	Iron	DHNA + Iron
[Fe2+] (mM)	0.0431888	0.118217	0.0491939	0.394489
	0.0438037	0.111524	0.0454316	0.370613
	0.0429355	0.110403	0.0439484	0.362691

## Sheet: Panel E
Iron reduction by L. plantarum after growth in mMRS with supplementation of DHNA, iron, and/or riboflavin.
Group	mMRS	mMRS + Riboflavin	mMRS + DHNA + Iron	mMRS + DHNA + Iron + Riboflavin
[Fe2+] (mM)	0.026026	0.026026	0.33749	0.313215
	0.0263963	0.0266923	0.302558	0.318766
	0.025508	0.021771	0.330681	0.28672
