# Supplementary material for: Extracellular electron transfer increases fermentation in lactic acid bacteria via a hybrid metabolism
Source: eLife. 2022 Feb 11;11:e70684. doi: 10.7554/eLife.70684 (PMC8837199; doi:10.7554/eLife.70684)
Supplement: Figure 1—figure supplement 2—source data 1. [file elife-70684-fig1-figsupp2-data1.xlsx]

## Sheet: Panel A abiotic current
Abiotic current production with DHNA.
	Time (days)	uA/cm2	uA/cm2	uA/cm2
	0	--	--	--	DHNA addition abiotic
	0.00125	1.20662	0.20046	2.0909
	0.00167	1.00089	0.16267	1.81065
	0.00208	0.93349	0.14526	1.6638
	0.0025	0.88182	0.13474	1.55294
	0.00292	0.84487	0.12876	1.50626
	0.00333	0.8243	0.12381	1.45855
	0.00375	0.83157	0.12099	1.43546
	0.00417	0.81444	0.11988	1.41901
	0.00458	0.75727	0.11818	1.41431
	0.005	0.75012	0.11574	1.39869
	0.00542	0.74228	0.11503	1.38603
	0.00583	0.77023	0.11368	1.39287
	0.00625	0.77839	0.11381	1.3725
	0.00667	0.75337	0.11175	1.37503
	0.00708	0.73211	0.11129	1.3763
	0.0075	0.72385	0.11118	1.35233
	0.00792	0.72904	0.11121	1.3552
	0.00833	0.74204	0.10975	1.34514
	0.00875	0.74734	0.11001	1.34929
	0.00917	0.73583	0.11073	1.32867
	0.00958	0.73947	0.10985	1.32415
	0.01	0.74125	0.10801	1.30378
	0.01042	0.71603	0.1089	1.30234
	0.01083	0.65136	0.10954	1.29486
	0.01125	0.64682	0.1078	1.26941
	0.01167	0.62423	0.10868	1.28131
	0.01208	0.71442	0.10891	1.27217
	0.0125	0.75613	0.10849	1.28309
	0.01292	0.74504	0.10876	1.28094
	0.01333	0.72285	0.10838	1.28086
	0.01375	0.69557	0.10832	1.26423
	0.01417	0.67808	0.10722	1.25553
	0.01458	0.68511	0.1075	1.24343
	0.015	0.70215	0.10591	1.24402
	0.01542	0.71766	0.10556	1.26828
	0.01583	0.71701	0.10606	1.2606
	0.01625	0.69949	0.10563	1.25314
	0.01667	0.68128	0.10764	1.24887
	0.01708	0.6923	0.10685	1.24609
	0.0175	0.68779	0.10673	1.2374
	0.01792	0.68749	0.10561	1.22852
	0.01833	0.67753	0.1062	1.23889
	0.01875	0.67403	0.10415	1.21682
	0.01917	0.65404	0.106	1.20932
	0.01958	0.67603	0.10423	1.2286
	0.02	0.68451	0.10427	1.21606
	0.02042	0.69485	0.10541	1.18869
	0.02083	0.68238	0.10517	1.19602
	0.02125	0.66546	0.10561	1.19988
	0.02167	0.67958	0.10449	1.21978
	0.02208	0.6909	0.10329	1.20455
	0.0225	0.70193	0.10425	1.19211
	0.02292	0.67266	0.10342	1.18531
	0.02333	0.67063	0.10332	1.18376
	0.02375	0.66446	0.10137	1.17575
	0.02417	0.64511	0.1027	1.17732
	0.02458	0.63362	0.10268	1.17057
	0.025	0.6226	0.10288	1.17101
	0.02542	0.62215	0.10225	1.16458
	0.02583	0.62624	0.10238	1.16656
	0.02625	0.64286	0.10337	1.15514
	0.02667	0.66317	0.1019	1.16455
	0.02708	0.67968	0.10269	1.15024
	0.0275	0.68427	0.10146	1.15601
	0.02792	0.68225	0.10143	1.14523
	0.02833	0.67694	0.10135	1.13683
	0.02875	0.66963	0.10181	1.13059
	0.02917	0.64918	0.10174	1.13551
	0.02958	0.63656	0.10148	1.13764
	0.03	0.66788	0.09986	1.12477
	0.03042	0.70733	0.09967	1.12166
	0.03083	0.70415	0.09986	1.1297
	0.03125	0.67467	0.10018	1.14097
	0.03167	0.68301	0.10019	1.14563
	0.03208	0.69269	0.09999	1.12131
	0.0325	0.66717	0.09998	1.11077
	0.03292	0.65092	0.09988	1.10769
	0.03333	0.64243	0.09897	1.10787
	0.03375	0.62203	0.09997	1.10528
	0.03417	0.61458	0.09903	1.09897
	0.03458	0.63454	0.10001	1.08681
	0.035	0.65946	0.09979	1.0919
	0.03542	0.6377	0.0998	1.0844
	0.03583	0.64384	0.09849	1.07853
	0.03625	0.64399	0.09951	1.08305
	0.03667	0.66157	0.09823	1.08401
	0.03708	0.6676	0.09778	1.09485
	0.0375	0.64472	0.09887	1.08238
	0.03792	0.63964	0.09918	1.09048
	0.03833	0.63734	0.09837	1.08854
	0.03875	0.62609	0.09949	1.07303
	0.03917	0.60176	0.09973	1.0691
	0.03958	0.62979	0.09965	1.06068
	0.04	0.62268	0.09802	1.05983
	0.04042	0.59575	0.09836	1.04904
	0.04083	0.58767	0.09776	1.04245
	0.04125	0.59569	0.09933	1.05425
	0.04167	0.60421	0.099	1.0615
	0.04208	0.62275	0.09809	1.06032
	0.0425	0.63336	0.0976	1.0518
	0.04292	0.63079	0.09776	1.04819
	0.04333	0.63399	0.09782	1.05293
	0.04375	0.63094	0.09692	1.04355
	0.04417	0.60659	0.0969	1.0314
	0.04458	0.6204	0.09741	1.0282
	0.045	0.6283	0.09831	1.03706
	0.04542	0.66657	0.09767	1.03302
	0.04583	0.66792	0.09618	1.03775
	0.04625	0.66481	0.09698	1.02055
	0.04667	0.67945	0.09712	1.02611
	0.04708	0.69055	0.09651	1.02275
	0.0475	0.69571	0.09662	1.01614
	0.04792	0.68362	0.09661	1.0197
	0.04833	0.67761	0.09586	1.01333
	0.04875	0.68729	0.09646	1.00119
	0.04917	0.6809	0.09655	0.9991
	0.04958	0.6765	0.09583	1.00375
	0.05	0.65243	0.09686	1.00296
	0.05042	0.652	0.09641	0.99753
	0.05083	0.63836	0.09639	0.98227
	0.05125	0.6497	0.09615	0.98494
	0.05167	0.69475	0.09583	0.98309
	0.05208	0.67633	0.09553	0.98464
	0.0525	0.63951	0.09576	0.98768
	0.05292	0.62606	0.09714	0.99363
	0.05333	0.62844	0.09573	0.97775
	0.05375	0.67107	0.09702	0.97645
	0.05417	0.65309	0.09687	0.98724
	0.05458	0.62544	0.09634	0.9821
	0.055	0.61282	0.09629	0.98375
	0.05542	0.60725	0.09684	0.96892
	0.05583	0.62381	0.09608	0.96236
	0.05625	0.6358	0.09635	0.96375
	0.05667	0.64821	0.09723	0.97215
	0.05708	0.63982	0.0955	0.9724
	0.0575	0.64552	0.09506	0.964
	0.05792	0.63674	0.09605	0.96765
	0.05833	0.65737	0.09606	0.96467
	0.05875	0.67072	0.09547	0.95654
	0.05917	0.64162	0.09447	0.97049
	0.05958	0.62674	0.09594	0.95818
	0.06	0.62544	0.09449	0.9396
	0.06042	0.60677	0.09511	0.93227
	0.06083	0.62667	0.09459	0.94357
	0.06125	0.61461	0.0955	0.94194
	0.06167	0.57074	0.09508	0.94372
	0.06208	0.56188	0.09538	0.94659
	0.0625	0.59637	0.09561	0.94478
	0.06292	0.57193	0.09567	0.94022
	0.06333	0.5421	0.09513	0.94363
	0.06375	0.5845	0.09423	0.94263
	0.06417	0.60436	0.09459	0.94822
	0.06458	0.60774	0.09457	0.9445
	0.065	0.60761	0.09571	0.9401
	0.06542	0.63954	0.09539	0.94174
	0.06583	0.61905	0.09504	0.94552
	0.06625	0.60516	0.09556	0.92565
	0.06667	0.63219	0.09543	0.93231
	0.06708	0.63021	0.09524	0.92594
	0.0675	0.61847	0.09535	0.92249
	0.06792	0.59912	0.09556	0.92653
	0.06833	0.59707	0.09479	0.91318
	0.06875	0.58073	0.09449	0.90905
	0.06917	0.58244	0.09326	0.92025
	0.06958	0.61075	0.09399	0.92116
	0.07	0.61757	0.09451	0.92044
	0.07042	0.60895	0.09376	0.91125
	0.07083	0.61675	0.09303	0.91789
	0.07125	0.59937	0.09416	0.90649
	0.07167	0.59515	0.09266	0.90704
	0.07208	0.61811	0.0929	0.90036
	0.0725	0.6181	0.09268	0.90678
	0.07292	0.63162	0.09255	0.90824
	0.07333	0.6363	0.0932	0.91286
	0.07375	0.63478	0.09289	0.90177
	0.07417	0.62923	0.093	0.89571
	0.07458	0.61497	0.09345	0.90391
	0.075	0.59269	0.09308	0.89702
	0.07542	0.58301	0.09281	0.9024
	0.07583	0.58813	0.09289	0.90016
	0.07625	0.51967	0.09258	0.90819
	0.07667	0.50909	0.09316	0.90251
	0.07708	0.51102	0.09317	0.89994
	0.0775	0.53689	0.09263	0.89916
	0.07792	0.53416	0.09356	0.88957
	0.07833	0.56559	0.09293	0.89455
	0.07875	0.58861	0.09181	0.88704
	0.07917	0.57871	0.09231	0.88174
	0.07958	0.57243	0.09254	0.87398
	0.08	0.56952	0.093	0.87777
	0.08042	0.54873	0.09216	0.8853
	0.08083	0.5437	0.09243	0.8775
	0.08125	0.5739	0.09286	0.8741
	0.08167	0.57715	0.0928	0.86972
	0.08208	0.51488	0.09332	0.86888
	0.0825	0.46107	0.09276	0.87297
	0.08292	0.45972	0.09197	0.86363
	0.08333	0.47444	0.09238	0.85888
	0.08375	0.51793	0.09258	0.8646
	0.08417	0.53394	0.09221	0.85863
	0.08458	0.54101	0.09244	0.87213
	0.085	0.57873	0.09235	0.86103
	0.08542	0.61006	0.09222	0.87427
	0.08583	0.62751	0.09368	0.87267
	0.08625	0.64667	0.09164	0.87179
	0.08667	0.64376	0.09243	0.86864
	0.08708	0.63689	0.09219	0.87605
	0.0875	0.61033	0.09167	0.87245
	0.08792	0.60132	0.093	0.86548
	0.08833	0.60138	0.09307	0.85574
	0.08875	0.59631	0.09091	0.8538
	0.08917	0.61298	0.09141	0.86309
	0.08958	0.59101	0.09145	0.8599
	0.09	0.59189	0.09173	0.8504
	0.09042	0.63163	0.09158	0.86276
	0.09083	0.61877	0.09286	0.85761
	0.09125	0.58009	0.09112	0.85561
	0.09167	0.58809	0.09175	0.85479
	0.09208	0.57857	0.09163	0.85033
	0.0925	0.56908	0.09153	0.84939
	0.09292	0.59389	0.09166	0.84566
	0.09333	0.58703	0.09116	0.85404
	0.09375	0.58496	0.09207	0.84167
	0.09417	0.59886	0.09171	0.83647
	0.09458	0.5815	0.09098	0.84102
	0.095	0.54868	0.09172	0.84793
	0.09542	0.50431	0.09164	0.84658
	0.09583	0.47015	0.09077	0.84253
	0.09625	0.49701	0.09211	0.84686
	0.09667	0.52943	0.091	0.83185
	0.09708	0.55466	0.09154	0.82498
	0.0975	0.61358	0.09151	0.82678
	0.09792	0.61016	0.09126	0.83143
	0.09833	0.57532	0.09129	0.84032
	0.09875	0.56285	0.09162	0.82644
	0.09917	0.54617	0.09077	0.82288
	0.09958	0.5456	0.09147	0.81843
	0.1	0.52937	0.09173	0.82897
	0.10042	0.51501	0.09072	0.82427
	0.10083	0.51954	0.09129	0.82192
	0.10125	0.53205	0.09003	0.83148
	0.10167	0.55475	0.09119	0.82417
	0.10208	0.50871	0.09139	0.81705
	0.1025	0.51619	0.09164	0.81839
	0.10292	0.54309	0.09172	0.81601
	0.10333	0.57058	0.09107	0.80552
	0.10375	0.57261	0.09229	0.80945
	0.10417	0.57592	0.09187	0.81115
	0.10458	0.57197	0.09143	0.81432
	0.105	0.57213	0.09212	0.80428
	0.10542	0.57371	0.09148	0.80214
	0.10583	0.56001	0.09066	0.80172
	0.10625	0.57534	0.09011	0.80873
	0.10667	0.5657	0.09075	0.8103
	0.10708	0.56759	0.09081	0.80848
	0.1075	0.56704	0.09041	0.8038
	0.10792	0.52478	0.09035	0.80203
	0.10833	0.51314	0.09116	0.79755
	0.10875	0.51626	0.0912	0.80169
	0.10917	0.51431	0.09076	0.7987
	0.10958	0.48613	0.09095	0.80246
	0.11	0.48703	0.09055	0.79639
	0.11042	0.50274	0.09075	0.79314
	0.11083	0.53795	0.09108	0.78732
	0.11125	0.56162	0.0908	0.78034
	0.11167	0.5544	0.09083	0.7895
	0.11208	0.55245	0.09097	0.79319
	0.1125	0.54197	0.09125	0.78346
	0.11292	0.53005	0.09159	0.79088
	0.11333	0.52864	0.09077	0.78998
	0.11375	0.5363	0.09153	0.78408
	0.11417	0.57778	0.09131	0.78035
	0.11458	0.57127	0.09135	0.78076
	0.115	0.56227	0.09077	0.77758
	0.11542	0.53806	0.09109	0.78493
	0.11583	0.5439	0.09114	0.77442
	0.11625	0.52167	0.0907	0.78084
	0.11667	0.5125	0.09094	0.78317
	0.11708	0.52684	0.09113	0.78013
	0.1175	0.53446	0.09046	0.76942
	0.11792	0.52886	0.09019	0.77264
	0.11833	0.53422	0.09075	0.77679
	0.11875	0.51686	0.09107	0.77016
	0.11917	0.5138	0.09042	0.77109
	0.11958	0.48257	0.09063	0.77036
	0.12	0.45013	0.09119	0.76833
	0.12042	0.45299	0.09073	0.771
	0.12083	0.48863	0.09096	0.77919
	0.12125	0.53286	0.09066	0.78354
	0.12167	0.5509	0.09135	0.78412
	0.12208	0.54111	0.08947	0.78293
	0.1225	0.53429	0.09142	0.78155
	0.12292	0.52757	0.09085	0.77607
	0.12333	0.52856	0.09018	0.7741
	0.12375	0.50911	0.09159	0.77147
	0.12417	0.52433	0.09116	0.77271
	0.12458	0.5107	0.09147	0.76885
	0.125	0.48032	0.09028	0.77694
	0.12542	0.47189	0.09174	0.77025
	0.12583	0.47325	0.09112	0.76987
	0.12625	0.48017	0.09188	0.77476
	0.12667	0.49397	0.09174	0.76781
	0.12708	0.47965	0.09117	0.76324
	0.1275	0.48517	0.09106	0.75894
	0.12792	0.46568	0.09168	0.76314
	0.12833	0.49243	0.09169	0.75955
	0.12875	0.49761	0.09171	0.75565
	0.12917	0.48371	0.09148	0.75791
	0.12958	0.48434	0.09176	0.75126
	0.13	0.51781	0.09228	0.75905
	0.13042	0.5299	0.0923	0.7633
	0.13083	0.50931	0.09285	0.75799
	0.13125	0.52794	0.09209	0.76022
	0.13167	0.50087	0.09144	0.76115
	0.13208	0.46974	0.09198	0.75799
	0.1325	0.50735	0.09128	0.74899
	0.13292	0.51436	0.09134	0.75288
	0.13333	0.53202	0.09036	0.74893
	0.13375	0.52634	0.0913	0.75308
	0.13417	0.47335	0.09181	0.75836
	0.13458	0.44915	0.09092	0.75617
	0.135	0.45779	0.09142	0.7624
	0.13542	0.46198	0.09159	0.75543
	0.13583	0.4474	0.09171	0.74712
	0.13625	0.44066	0.09142	0.74686
	0.13667	0.45827	0.0914	0.74511
	0.13708	0.47777	0.09148	0.74405
	0.1375	0.48174	0.09183	0.74015
	0.13792	0.4975	0.09145	0.73854
	0.13833	0.47649	0.09127	0.73801
	0.13875	0.47975	0.09144	0.73768
	0.13917	0.4717	0.09194	0.74154
	0.13958	0.47288	0.09132	0.744
	0.14	0.45024	0.09171	0.73742
	0.14042	0.47141	0.0912	0.73315
	0.14083	0.51832	0.09157	0.72487
	0.14125	0.52079	0.09204	0.72823
	0.14167	0.528	0.09228	0.7331
	0.14208	0.52106	0.09231	0.73771
	0.1425	0.50531	0.09208	0.73711
	0.14292	0.50748	0.09214	0.73023
	0.14333	0.5182	0.09183	0.72728
	0.14375	0.49976	0.09212	0.72339
	0.14417	0.4469	0.09219	0.72708
	0.14458	0.42897	0.09101	0.7282
	0.145	0.4372	0.09184	0.72137
	0.14542	0.43413	0.09154	0.71963
	0.14583	0.42932	0.09145	0.72025
	0.14625	0.43401	0.09201	0.71537
	0.14667	0.44845	0.09181	0.71706
	0.14708	0.43299	0.09141	0.72171
	0.1475	0.42009	0.09239	0.72338
	0.14792	0.42084	0.09179	0.71734
	0.14833	0.45018	0.09154	0.7145
	0.14875	0.43944	0.09186	0.71737
	0.14917	0.45026	0.09188	0.72185
	0.14958	0.45324	0.09238	0.7225
	0.15	0.45456	0.09144	0.71813
	0.15042	0.45044	0.09204	0.71776
	0.15083	0.43991	0.09142	0.72398
	0.15125	0.44118	0.09198	0.71506
	0.15167	0.44485	0.09174	0.72044
	0.15208	0.44648	0.09202	0.71973
	0.1525	0.4539	0.09148	0.72033
	0.15292	0.47768	0.09043	0.72072
	0.15333	0.49625	0.0916	0.71714
	0.15375	0.47031	0.09111	0.71337
	0.15417	0.48416	0.09157	0.70624
	0.15458	0.49809	0.09124	0.70669
	0.155	0.50246	0.0913	0.70779
	0.15542	0.50325	0.09193	0.70641
	0.15583	0.50224	0.09152	0.70616
	0.15625	0.49449	0.09238	0.70563
	0.15667	0.46596	0.09204	0.70851
	0.15708	0.47653	0.09188	0.69635
	0.1575	0.46409	0.09152	0.70045
	0.15792	0.4545	0.09192	0.70318
	0.15833	0.46137	0.09083	0.70699
	0.15875	0.45892	0.09118	0.69513
	0.15917	0.43682	0.09168	0.70035
	0.15958	0.4255	0.09158	0.69981
	0.16	0.44996	0.09084	0.69639
	0.16042	0.45275	0.09119	0.69798
	0.16083	0.44926	0.09007	0.69373
	0.16125	0.47978	0.09131	0.68884
	0.16167	0.47712	0.09189	0.6959
	0.16208	0.45807	0.09215	0.69089
	0.1625	0.45724	0.0916	0.69342
	0.16292	0.4595	0.09182	0.69729
	0.16333	0.47597	0.09176	0.69231
	0.16375	0.47782	0.09209	0.68749
	0.16417	0.48144	0.09107	0.68366
	0.16458	0.48835	0.09199	0.69717
	0.165	0.47404	0.09128	0.68946
	0.16542	0.45876	0.09176	0.68673
	0.16583	0.46518	0.09249	0.68224
	0.16625	0.4687	0.09107	0.68792
	0.16667	0.49515	0.08996	0.68604
	0.16708	0.51668	0.09089	0.68521
	0.1675	0.51901	0.09181	0.68667
	0.16792	0.49095	0.0919	0.6875
	0.16833	0.48315	0.09182	0.68077
	0.16875	0.49601	0.09189	0.67899
	0.16917	0.51173	0.091	0.67322
	0.16958	0.49241	0.09104	0.68616
	0.17	0.48242	0.09259	0.67945
	0.17042	0.51364	0.09166	0.67406
	0.17083	0.52836	0.09086	0.68813
	0.17125	0.51055	0.09113	0.68733
	0.17167	0.4823	0.09148	0.68564
	0.17208	0.48019	0.09163	0.68
	0.1725	0.47483	0.09161	0.6814
	0.17292	0.51003	0.09195	0.68321
	0.17333	0.52204	0.09236	0.67465
	0.17375	0.51952	0.09216	0.66809
	0.17417	0.50894	0.09239	0.66785
	0.17458	0.49588	0.09194	0.66911
	0.175	0.49067	0.09146	0.67194
	0.17542	0.47954	0.09058	0.66901
	0.17583	0.45301	0.09088	0.671
	0.17625	0.45305	0.09157	0.66988
	0.17667	0.46309	0.09124	0.67145
	0.17708	0.48411	0.09117	0.66862
	0.1775	0.49608	0.0919	0.66926
	0.17792	0.49835	0.09195	0.67455
	0.17833	0.46373	0.09131	0.6725
	0.17875	0.43671	0.09204	0.66468
	0.17917	0.43773	0.09218	0.66258
	0.17958	0.44889	0.09208	0.66042
	0.18	0.45623	0.09243	0.65332
	0.18042	0.44658	0.09194	0.65893
	0.18083	0.43849	0.09208	0.65565
	0.18125	0.42382	0.09147	0.66077
	0.18167	0.42718	0.0921	0.65276
	0.18208	0.46749	0.09181	0.6563
	0.1825	0.48471	0.0927	0.66095
	0.18292	0.46513	0.09148	0.65793
	0.18333	0.47205	0.09192	0.66059
	0.18375	0.45929	0.09208	0.65597
	0.18417	0.45072	0.09265	0.65771
	0.18458	0.48058	0.09212	0.65885
	0.185	0.48046	0.09362	0.66431
	0.18542	0.46456	0.0923	0.66583
	0.18583	0.45345	0.09232	0.66348
	0.18625	0.4614	0.09208	0.66455
	0.18667	0.4525	0.09195	0.66314
	0.18708	0.4483	0.09231	0.66302
	0.1875	0.47135	0.09266	0.6566
	0.18792	0.45613	0.09211	0.652
	0.18833	0.44524	0.09272	0.65163
	0.18875	0.43214	0.09278	0.65241
	0.18917	0.43585	0.09179	0.65273
	0.18958	0.45021	0.09236	0.65285
	0.19	0.44395	0.09257	0.64752
	0.19042	0.438	0.09258	0.64907
	0.19083	0.43684	0.09209	0.6495
	0.19125	0.42487	0.09261	0.64992
	0.19167	0.44753	0.09285	0.64953
	0.19208	0.41788	0.09243	0.64945
	0.1925	0.39	0.09248	0.64515
	0.19292	0.3765	0.09172	0.64108
	0.19333	0.37361	0.09226	0.6413
	0.19375	0.36886	0.09219	0.63854
	0.19417	0.37545	0.09235	0.64445
	0.19458	0.38724	0.09257	0.64067
	0.195	0.40654	0.09298	0.64604
	0.19542	0.40703	0.09283	0.64875
	0.19583	0.39973	0.09224	0.64443
	0.19625	0.40531	0.09282	0.64486
	0.19667	0.41274	0.09336	0.64415
	0.19708	0.42303	0.09247	0.64408
	0.1975	0.42285	0.09212	0.64573
	0.19792	0.41068	0.09236	0.63601
	0.19833	0.42005	0.09159	0.63954
	0.19875	0.40797	0.09327	0.64575
	0.19917	0.40114	0.09319	0.64271
	0.19958	0.40568	0.09325	0.64054
	0.2	0.40076	0.09341	0.63915
	0.20042	0.42459	0.09287	0.64255
	0.20083	0.42364	0.09217	0.63733
	0.20125	0.44333	0.09293	0.64201
	0.20167	0.45407	0.09381	0.64044
	0.20208	0.42788	0.09374	0.63967
	0.2025	0.44099	0.09389	0.63503
	0.20292	0.4437	0.0932	0.63423
	0.20333	0.4314	0.09258	0.63031
	0.20375	0.41941	0.09279	0.63227
	0.20417	0.40784	0.09367	0.63612
	0.20458	0.42813	0.09213	0.6335
	0.205	0.43403	0.09221	0.62379
	0.20542	0.41486	0.09259	0.62522
	0.20583	0.40126	0.09265	0.6265
	0.20625	0.40063	0.09291	0.62336
	0.20667	0.34285	0.09283	0.63204
	0.20708	0.33881	0.09369	0.63281
	0.2075	0.36592	0.09333	0.63138
	0.20792	0.386	0.09262	0.62318
	0.20833	0.37866	0.09314	0.62809
	0.20875	0.38664	0.09224	0.62895
	0.20917	0.39226	0.09249	0.63168
	0.20958	0.3981	0.0931	0.63025
	0.21	0.40198	0.09375	0.62427
	0.21042	0.41434	0.09352	0.61973
	0.21083	0.42425	0.09387	0.62064
	0.21125	0.42919	0.09327	0.62188
	0.21167	0.41195	0.09333	0.62415
	0.21208	0.39935	0.09281	0.6256
	0.2125	0.38038	0.09322	0.62202
	0.21292	0.37165	0.09339	0.62127
	0.21333	0.35913	0.0933	0.62835
	0.21375	0.3518	0.09328	0.62933
	0.21417	0.34335	0.09262	0.62899
	0.21458	0.35137	0.09263	0.62122
	0.215	0.3784	0.09298	0.6197
	0.21542	0.36902	0.09265	0.61305
	0.21583	0.34919	0.09369	0.61034
	0.21625	0.33173	0.09268	0.60889
	0.21667	0.33357	0.09283	0.61211
	0.21708	0.3266	0.09316	0.61853
	0.2175	0.34712	0.09354	0.61531
	0.21792	0.36887	0.09407	0.61301
	0.21833	0.39338	0.09259	0.61598
	0.21875	0.39322	0.09273	0.61477
	0.21917	0.39259	0.09267	0.6127
	0.21958	0.39782	0.09336	0.61175
	0.22	0.38267	0.09376	0.61017
	0.22042	0.38715	0.09379	0.61073
	0.22083	0.39517	0.09368	0.61669
	0.22125	0.42263	0.09348	0.61624
	0.22167	0.40357	0.09319	0.61425
	0.22208	0.40698	0.0938	0.61827
	0.2225	0.4078	0.09332	0.61815
	0.22292	0.3929	0.09294	0.61931
	0.22333	0.4052	0.09296	0.61086
	0.22375	0.40094	0.09351	0.60696
	0.22417	0.40233	0.09325	0.60314
	0.22458	0.40385	0.094	0.60506
	0.225	0.4075	0.09399	0.60367
	0.22542	0.41156	0.0941	0.6024
	0.22583	0.39612	0.09355	0.60821
	0.22625	0.38315	0.09435	0.60478
	0.22667	0.36949	0.09387	0.60357
	0.22708	0.38837	0.09363	0.60513
	0.2275	0.39053	0.09395	0.60515
	0.22792	0.39877	0.09334	0.6012
	0.22833	0.39576	0.09413	0.60159
	0.22875	0.38633	0.09377	0.60182
	0.22917	0.37013	0.09351	0.60221
	0.22958	0.357	0.09291	0.60528
	0.23	0.372	0.09337	0.60167
	0.23042	0.39026	0.09355	0.60504
	0.23083	0.40856	0.09267	0.6013
	0.23125	0.41454	0.09295	0.59415
	0.23167	0.42312	0.09373	0.59584
	0.23208	0.41446	0.09285	0.60303
	0.2325	0.4043	0.09312	0.6014
	0.23292	0.40369	0.09333	0.5934
	0.23333	0.40187	0.09338	0.59135
	0.23375	0.40466	0.0936	0.59587
	0.23417	0.39007	0.09305	0.59695
	0.23458	0.38642	0.09318	0.597
	0.235	0.39384	0.09385	0.60189
	0.23542	0.39815	0.09363	0.60285
	0.23583	0.40846	0.09348	0.59941
	0.23625	0.41812	0.09383	0.59291
	0.23667	0.40294	0.09408	0.59132
	0.23708	0.41914	0.0938	0.59094
	0.2375	0.4367	0.0935	0.59153
	0.23792	0.42153	0.09378	0.58992
	0.23833	0.41447	0.09293	0.58728
	0.23875	0.40343	0.09358	0.59198
	0.23917	0.36256	0.09342	0.59356
	0.23958	0.358	0.09307	0.5886
	0.24	0.35555	0.0937	0.59155
	0.24042	0.38109	0.09365	0.59006
	0.24083	0.39094	0.09387	0.58721
	0.24125	0.39506	0.09337	0.58805
	0.24167	0.40528	0.09261	0.58727
	0.24208	0.39345	0.09228	0.59119
	0.2425	0.38879	0.09261	0.58588
	0.24292	0.38753	0.09258	0.58429
	0.24333	0.38683	0.09273	0.58851
	0.24375	0.37301	0.09217	0.58484
	0.24417	0.37848	0.09217	0.58331
	0.24458	0.37807	0.09315	0.58331
	0.245	0.37983	0.09288	0.58431
	0.24542	0.35643	0.09377	0.58926
	0.24583	0.35785	0.0934	0.58835
	0.24625	0.37941	0.09315	0.58719
	0.24667	0.39681	0.09327	0.5818
	0.24708	0.39919	0.09349	0.5809
	0.2475	0.40879	0.093	0.58402
	0.24792	0.39569	0.09322	0.5815
	0.24833	0.36977	0.09345	0.57757
	0.24875	0.35361	0.09386	0.58154
	0.24917	0.33557	0.09332	0.57849
	0.24958	0.31712	0.09306	0.57842
	0.25	0.32633	0.09319	0.57466
	0.25042	0.3201	0.0938	0.57798
	0.25083	0.31203	0.09354	0.57173
	0.25125	0.31782	0.09381	0.57217
	0.25167	0.34071	0.093	0.57559
	0.25208	0.34346	0.09271	0.5789
	0.2525	0.34931	0.0933	0.57427
	0.25292	0.33331	0.09363	0.57439
	0.25333	0.32404	0.0928	0.57449
	0.25375	0.31743	0.09326	0.58081
	0.25417	0.3266	0.09251	0.57728
	0.25458	0.3221	0.09264	0.5736
	0.255	0.31815	0.09181	0.57355
	0.25542	0.31969	0.0924	0.56913
	0.25583	0.3132	0.09226	0.57061
	0.25625	0.33621	0.09324	0.57227
	0.25667	0.33514	0.09151	0.56876
	0.25708	0.34109	0.09205	0.56687
	0.2575	0.33974	0.09289	0.56656
	0.25792	0.34038	0.093	0.56781
	0.25833	0.33718	0.09267	0.56594
	0.25875	0.34812	0.09347	0.57187
	0.25917	0.35264	0.0931	0.56732
	0.25958	0.37002	0.09336	0.57161
	0.26	0.36305	0.09361	0.56609
	0.26042	0.36095	0.09364	0.56612
	0.26083	0.37853	0.09313	0.57216
	0.26125	0.37089	0.09278	0.56857
	0.26167	0.36694	0.09305	0.56537
	0.26208	0.36463	0.09413	0.56915
	0.2625	0.37743	0.09363	0.56539
	0.26292	0.37543	0.09305	0.5701
	0.26333	0.36824	0.09365	0.56784
	0.26375	0.3686	0.09346	0.56643
	0.26417	0.35492	0.09339	0.55956
	0.26458	0.35552	0.0928	0.55794
	0.265	0.36383	0.09432	0.55996
	0.26542	0.36483	0.09366	0.56014
	0.26583	0.37214	0.09385	0.56112
	0.26625	0.36671	0.09427	0.56073
	0.26667	0.33644	0.09417	0.56398
	0.26708	0.341	0.09345	0.56559
	0.2675	0.35282	0.09333	0.56342
	0.26792	0.36626	0.09383	0.56647
	0.26833	0.38318	0.09277	0.56596
	0.26875	0.38138	0.09287	0.56113
	0.26917	0.38885	0.09323	0.55937
	0.26958	0.39991	0.09324	0.55512
	0.27	0.40325	0.09305	0.55471
	0.27042	0.39359	0.09365	0.56116
	0.27083	0.38189	0.09313	0.55832
	0.27125	0.36334	0.0929	0.55181
	0.27167	0.34605	0.09365	0.55092
	0.27208	0.35022	0.09391	0.55054
	0.2725	0.33905	0.09315	0.55498
	0.27292	0.33209	0.09248	0.55737
	0.27333	0.3426	0.09321	0.54926
	0.27375	0.33977	0.09391	0.54883
	0.27417	0.34201	0.09479	0.55438
	0.27458	0.36418	0.09425	0.55355
	0.275	0.37576	0.09431	0.55523
	0.27542	0.37394	0.09345	0.55315
	0.27583	0.40105	0.09333	0.55458
	0.27625	0.40892	0.09272	0.55197
	0.27667	0.42654	0.0929	0.54859
	0.27708	0.45561	0.09321	0.55228
	0.2775	0.4389	0.0923	0.55216
	0.27792	0.41986	0.09325	0.54867
	0.27833	0.40916	0.09358	0.54889
	0.27875	0.3912	0.09241	0.55297
	0.27917	0.35323	0.09297	0.54844
	0.27958	0.37442	0.09376	0.55097
	0.28	0.39954	0.09352	0.55078
	0.28042	0.39815	0.09322	0.55194
	0.28083	0.41617	0.09383	0.55253
	0.28125	0.40944	0.09352	0.55077
	0.28167	0.42471	0.0931	0.54759
	0.28208	0.41963	0.09299	0.54634
	0.2825	0.40664	0.09397	0.54692
	0.28292	0.40928	0.09328	0.54585
	0.28333	0.40349	0.09448	0.54678
	0.28375	0.37788	0.09428	0.54155
	0.28417	0.37443	0.0943	0.54573
	0.28458	0.41193	0.09524	0.54233
	0.285	0.41255	0.09399	0.54624
	0.28542	0.36908	0.09366	0.54598
	0.28583	0.32754	0.09343	0.54672
	0.28625	0.31428	0.09451	0.54375
	0.28667	0.32157	0.09477	0.54431
	0.28708	0.32707	0.09438	0.54294
	0.2875	0.32225	0.09391	0.54254
	0.28792	0.32078	0.09459	0.54119
	0.28833	0.3245	0.09463	0.54389
	0.28875	0.3347	0.09363	0.54163
	0.28917	0.33339	0.09488	0.53831
	0.28958	0.34067	0.09519	0.53642
	0.29	0.34812	0.09376	0.53762
	0.29042	0.35391	0.09499	0.53639
	0.29083	0.34832	0.09507	0.53569
	0.29125	0.35071	0.09486	0.5319
	0.29167	0.35884	0.09509	0.53717
	0.29208	0.33511	0.0939	0.53848
	0.2925	0.31783	0.09409	0.53295
	0.29292	0.31989	0.09521	0.53691
	0.29333	0.34142	0.09475	0.53939
	0.29375	0.34791	0.09506	0.53463
	0.29417	0.35004	0.09467	0.53942
	0.29458	0.36861	0.09464	0.5348
	0.295	0.38561	0.09516	0.53416
	0.29542	0.38368	0.09451	0.53794
	0.29583	0.40131	0.09378	0.5316
	0.29625	0.39047	0.0943	0.53816
	0.29667	0.39429	0.09429	0.53852
	0.29708	0.39395	0.09499	0.53433
	0.2975	0.3987	0.09508	0.53614
	0.29792	0.40448	0.09527	0.53518
	0.29833	0.39226	0.09448	0.53179
	0.29875	0.40404	0.0956	0.53316
	0.29917	0.40865	0.09575	0.53005
	0.29958	0.40824	0.0945	0.53526
	0.3	0.40134	0.09507	0.5298
	0.30042	0.39765	0.09479	0.52335
	0.30083	0.40713	0.0947	0.52938
	0.30125	0.40521	0.0952	0.52989
	0.30167	0.40808	0.09556	0.52876
	0.30208	0.34671	0.09466	0.53197
	0.3025	0.36167	0.09372	0.53701
	0.30292	0.37486	0.09469	0.53653
	0.30333	0.37806	0.09405	0.53688
	0.30375	0.39377	0.09417	0.5322
	0.30417	0.39199	0.09499	0.53188
	0.30458	0.40396	0.09461	0.5313
	0.305	0.40195	0.09423	0.5339
	0.30542	0.3817	0.09479	0.53197
	0.30583	0.38513	0.09469	0.52972
	0.30625	0.37721	0.0948	0.52481
	0.30667	0.37025	0.09489	0.52622
	0.30708	0.36912	0.09424	0.52252
	0.3075	0.36664	0.0946	0.52026
	0.30792	0.36133	0.09421	0.52266
	0.30833	0.37496	0.09485	0.51777
	0.30875	0.39468	0.09435	0.52247
	0.30917	0.38675	0.09414	0.52661
	0.30958	0.37502	0.09521	0.52505
	0.31	0.3852	0.09529	0.52397
	0.31042	0.3886	0.09565	0.52141
	0.31083	0.39721	0.09575	0.51935
	0.31125	0.39242	0.09585	0.52453
	0.31167	0.38983	0.09546	0.52424
	0.31208	0.38564	0.09535	0.52433
	0.3125	0.39411	0.09592	0.52346
	0.31292	0.39832	0.09596	0.52483
	0.31333	0.38952	0.0957	0.52114
	0.31375	0.38289	0.09475	0.52082
	0.31417	0.35876	0.09475	0.51628
	0.31458	0.36127	0.09607	0.51972
	0.315	0.37051	0.09597	0.52337
	0.31542	0.3739	0.09585	0.52207
	0.31583	0.39784	0.09489	0.52758
	0.31625	0.39397	0.09486	0.52591
	0.31667	0.38708	0.09521	0.52206
	0.31708	0.35305	0.09545	0.51939
	0.3175	0.34705	0.09515	0.52269
	0.31792	0.34284	0.09472	0.51883
	0.31833	0.33902	0.09604	0.51891
	0.31875	0.33272	0.09544	0.51992
	0.31917	0.33893	0.09583	0.5193
	0.31958	0.37078	0.09557	0.51644
	0.32	0.36727	0.09568	0.51769
	0.32042	0.36409	0.09536	0.51617
	0.32083	0.3547	0.0955	0.51641
	0.32125	0.36712	0.09507	0.52103
	0.32167	0.36501	0.09547	0.51624
	0.32208	0.36871	0.09487	0.5124
	0.3225	0.37078	0.09613	0.51652
	0.32292	0.37534	0.09568	0.51569
	0.32333	0.37958	0.09474	0.51142
	0.32375	0.33737	0.09523	0.5093
	0.32417	0.33721	0.09633	0.5059
	0.32458	0.32824	0.09487	0.513
	0.325	0.34838	0.09685	0.50698
	0.32542	0.34773	0.0955	0.51222
	0.32583	0.32921	0.09513	0.51016
	0.32625	0.34515	0.09542	0.51149
	0.32667	0.35835	0.09528	0.5108
	0.32708	0.37636	0.09564	0.5058
	0.3275	0.31665	0.09584	0.50339
	0.32792	0.32686	0.09573	0.50633
	0.32833	0.37004	0.09663	0.50992
	0.32875	0.3841	0.09582	0.50913
	0.32917	0.37636	0.09548	0.50726
	0.32958	0.37172	0.09648	0.50431
	0.33	0.38261	0.09595	0.5028
	0.33042	0.3927	0.09562	0.50089
	0.33083	0.36969	0.09567	0.49816
	0.33125	0.36495	0.09601	0.50273
	0.33167	0.36147	0.09556	0.50211
	0.33208	0.35743	0.09592	0.50466
	0.3325	0.37089	0.09491	0.50783
	0.33292	0.36637	0.09608	0.50229
	0.33333	0.33338	0.09529	0.50195
	0.33375	0.34015	0.09614	0.50257
	0.33417	0.35378	0.09601	0.50384
	0.33458	0.34746	0.09498	0.50701
	0.335	0.35333	0.09444	0.50943
	0.33542	0.34873	0.09483	0.50329
	0.33583	0.34543	0.09423	0.50264
	0.33625	0.36258	0.09483	0.50128
	0.33667	0.36661	0.09539	0.50162
	0.33708	0.36319	0.09579	0.50454
	0.3375	0.37077	0.09605	0.49806
	0.33792	0.38265	0.09635	0.4981
	0.33833	0.37204	0.09583	0.50096
	0.33875	0.35298	0.09577	0.49795
	0.33917	0.35269	0.09534	0.49892
	0.33958	0.36475	0.09546	0.49911
	0.34	0.32465	0.09623	0.50173
	0.34042	0.32821	0.09618	0.49758
	0.34083	0.33681	0.09583	0.49692
	0.34125	0.33721	0.09591	0.49808
	0.34167	0.31725	0.09581	0.50205
	0.34208	0.31534	0.09604	0.49987
	0.3425	0.3339	0.09662	0.49746
	0.34292	0.33678	0.09537	0.49562
	0.34333	0.34314	0.09543	0.49897
	0.34375	0.31623	0.09558	0.49497
	0.34417	0.33884	0.09558	0.49354
	0.34458	0.34921	0.09625	0.49333
	0.345	0.3387	0.09663	0.49322
	0.34542	0.33141	0.09628	0.49802
	0.34583	0.34092	0.09517	0.49725
	0.34625	0.34102	0.09613	0.49914
	0.34667	0.3378	0.09623	0.49626
	0.34708	0.34281	0.09636	0.49728
	0.3475	0.3442	0.09617	0.4986
	0.34792	0.35092	0.09629	0.49868
	0.34833	0.33464	0.09614	0.49259
	0.34875	0.3226	0.09628	0.49168
	0.34917	0.32859	0.0961	0.4949
	0.34958	0.32343	0.09633	0.49819
	0.35	0.34105	0.09656	0.49356
	0.35042	0.34909	0.0959	0.49125
	0.35083	0.32212	0.09554	0.48904
	0.35125	0.34156	0.09609	0.49606
	0.35167	0.34052	0.09623	0.49745
	0.35208	0.34876	0.09702	0.49352
	0.3525	0.34317	0.09691	0.48946
	0.35292	0.35682	0.09611	0.49501
	0.35333	0.33678	0.09622	0.49332
	0.35375	0.34281	0.09638	0.49583
	0.35417	0.355	0.09646	0.49615
	0.35458	0.35437	0.09594	0.4953
	0.355	0.35809	0.09604	0.49437
	0.35542	0.35273	0.09587	0.49677
	0.35583	0.32688	0.09495	0.48823
	0.35625	0.35228	0.09641	0.48747
	0.35667	0.35164	0.09628	0.48679
	0.35708	0.35121	0.09573	0.48335
	0.3575	0.36362	0.09497	0.48415
	0.35792	0.37933	0.09578	0.484
	0.35833	0.3865	0.0959	0.48575
	0.35875	0.36566	0.09645	0.48856
	0.35917	0.36759	0.09591	0.48514
	0.35958	0.36053	0.09595	0.48768
	0.36	0.36674	0.09608	0.49539
	0.36042	0.37605	0.09642	0.49057
	0.36083	0.36087	0.09631	0.4876
	0.36125	0.36656	0.09582	0.48692
	0.36167	0.36222	0.09594	0.48804
	0.36208	0.34664	0.09638	0.48912
	0.3625	0.34591	0.09671	0.48928
	0.36292	0.36227	0.09539	0.48283
	0.36333	0.36589	0.09547	0.48471
	0.36375	0.34903	0.09513	0.4837
	0.36417	0.33707	0.09527	0.48324
	0.36458	0.33728	0.0958	0.48817
	0.365	0.32941	0.09612	0.49153
	0.36542	0.34125	0.09606	0.48103
	0.36583	0.34137	0.09633	0.47917
	0.36625	0.33758	0.09587	0.4794
	0.36667	0.31699	0.09552	0.48052
	0.36708	0.33497	0.09516	0.48087
	0.3675	0.34831	0.09506	0.47636
	0.36792	0.35175	0.09535	0.48154
	0.36833	0.34756	0.09519	0.48106
	0.36875	0.345	0.09626	0.47914
	0.36917	0.33823	0.09543	0.47883
	0.36958	0.33858	0.09555	0.47818
	0.37	0.32581	0.09525	0.47986
	0.37042	0.32504	0.09624	0.4824
	0.37083	0.33034	0.0966	0.48405
	0.37125	0.3276	0.0963	0.4816
	0.37167	0.32924	0.09684	0.48216
	0.37208	0.33405	0.09619	0.48422
	0.3725	0.34227	0.09642	0.48559
	0.37292	0.34225	0.09627	0.48189
	0.37333	0.34199	0.09605	0.47903
	0.37375	0.34966	0.09594	0.47868
	0.37417	0.35182	0.09599	0.47174
	0.37458	0.34578	0.09516	0.47365
	0.375	0.36342	0.09579	0.47635
	0.37542	0.37991	0.09467	0.47817
	0.37583	0.36172	0.09503	0.47575
	0.37625	0.35788	0.09596	0.47896
	0.37667	0.35412	0.09465	0.47723
	0.37708	0.342	0.09573	0.47757
	0.3775	0.33966	0.09525	0.47873
	0.37792	0.34307	0.09543	0.47408
	0.37833	0.35034	0.09529	0.48027
	0.37875	0.35261	0.09598	0.47387
	0.37917	0.36138	0.09544	0.47309
	0.37958	0.35588	0.09525	0.47359
	0.38	0.35703	0.09616	0.47164
	0.38042	0.36294	0.09581	0.47428
	0.38083	0.35211	0.09579	0.47182
	0.38125	0.34459	0.09647	0.47362
	0.38167	0.33267	0.09605	0.47576
	0.38208	0.34017	0.09547	0.4729
	0.3825	0.34212	0.09619	0.47836
	0.38292	0.33604	0.09657	0.47573
	0.38333	0.33202	0.0969	0.47063
	0.38375	0.34599	0.09599	0.4741
	0.38417	0.34502	0.0963	0.47398
	0.38458	0.34893	0.09567	0.46961
	0.385	0.34689	0.09631	0.46976
	0.38542	0.34716	0.09593	0.47391
	0.38583	0.35539	0.09624	0.47062
	0.38625	0.35651	0.09539	0.47148
	0.38667	0.35455	0.09665	0.4697
	0.38708	0.34712	0.09655	0.46993
	0.3875	0.34662	0.09591	0.46652
	0.38792	0.3506	0.09561	0.46611
	0.38833	0.36258	0.09568	0.46969
	0.38875	0.35279	0.09581	0.47004
	0.38917	0.34697	0.09515	0.47066
	0.38958	0.34261	0.09661	0.47362
	0.39	0.33311	0.09548	0.47129
	0.39042	0.33013	0.09605	0.46927
	0.39083	0.33837	0.0968	0.46907
	0.39125	0.34341	0.0961	0.46659
	0.39167	0.34559	0.09652	0.46898
	0.39208	0.34144	0.09652	0.46959
	0.3925	0.36737	0.09686	0.46555
	0.39292	0.35167	0.09661	0.46886
	0.39333	0.34713	0.09649	0.46919
	0.39375	0.31197	0.09611	0.46737
	0.39417	0.29716	0.09668	0.46834
	0.39458	0.30572	0.09654	0.46967
	0.395	0.31325	0.09732	0.47169
	0.39542	0.31811	0.09599	0.46829
	0.39583	0.32011	0.09661	0.46679
	0.39625	0.31961	0.09616	0.46254
	0.39667	0.31176	0.09648	0.46579
	0.39708	0.3188	0.09599	0.461
	0.3975	0.32701	0.09574	0.45792
	0.39792	0.28935	0.09653	0.46104
	0.39833	0.29889	0.09659	0.46776
	0.39875	0.30411	0.09643	0.46465
	0.39917	0.30472	0.09657	0.45822
	0.39958	0.30293	0.09647	0.46272
	0.4	0.31198	0.09622	0.46348
	0.40042	0.31479	0.09673	0.45814
	0.40083	0.30218	0.09676	0.46007
	0.40125	0.28771	0.09638	0.46058
	0.40167	0.30759	0.09571	0.46087
	0.40208	0.3105	0.09544	0.46433
	0.4025	0.30982	0.09659	0.4629
	0.40292	0.30179	0.0963	0.45837
	0.40333	0.32514	0.09533	0.46065
	0.40375	0.33133	0.09468	0.45959
	0.40417	0.30818	0.09601	0.4612
	0.40458	0.31757	0.09609	0.45818
	0.405	0.31733	0.09663	0.46201
	0.40542	0.31434	0.0964	0.46169
	0.40583	0.31586	0.09641	0.46357
	0.40625	0.32559	0.09672	0.46315
	0.40667	0.32451	0.09606	0.46179
	0.40708	0.3219	0.09607	0.46134
	0.4075	0.31138	0.09633	0.46025
	0.40792	0.32031	0.09662	0.45822
	0.40833	0.31692	0.09689	0.46387
	0.40875	0.3231	0.09754	0.46097
	0.40917	0.31793	0.09748	0.4584
	0.40958	0.32156	0.09746	0.45766
	0.41	0.3215	0.0973	0.45585
	0.41042	0.32535	0.09674	0.45982
	0.41083	0.31875	0.09651	0.45932
	0.41125	0.33552	0.09571	0.46056
	0.41167	0.34934	0.09607	0.46058
	0.41208	0.33276	0.09621	0.46276
	0.4125	0.3394	0.09695	0.46121
	0.41292	0.3493	0.09712	0.45689
	0.41333	0.34997	0.09711	0.45991
	0.41375	0.34007	0.09723	0.4591
	0.41417	0.32899	0.09719	0.4585
	0.41458	0.34648	0.09824	0.45199
	0.415	0.37061	0.0974	0.45236
	0.41542	0.37238	0.09773	0.45178
	0.41583	0.36267	0.09773	0.45487
	0.41625	0.36775	0.09719	0.45455
	0.41667	0.36829	0.09773	0.45108
	0.41708	0.39121	0.09724	0.45119
	0.4175	0.40809	0.09816	0.45237
	0.41792	0.39284	0.09746	0.45457
	0.41833	0.37209	0.0974	0.45426
	0.41875	0.37112	0.09706	0.45355
	0.41917	0.37157	0.09625	0.45383
	0.41958	0.38121	0.0964	0.45448
	0.42	0.38647	0.09786	0.45191
	0.42042	0.38662	0.09711	0.45405
	0.42083	0.39012	0.0971	0.45112
	0.42125	0.37562	0.09747	0.448
	0.42167	0.38869	0.09677	0.44714
	0.42208	0.38993	0.09715	0.4506
	0.4225	0.38706	0.09697	0.45119
	0.42292	0.39984	0.09586	0.44687
	0.42333	0.38335	0.09642	0.44685
	0.42375	0.38209	0.09784	0.44771
	0.42417	0.37974	0.09843	0.45229
	0.42458	0.36499	0.09759	0.45083
	0.425	0.34732	0.09649	0.45289
	0.42542	0.34995	0.09643	0.45116
	0.42583	0.35189	0.09665	0.44989
	0.42625	0.36571	0.09671	0.45142
	0.42667	0.35896	0.09695	0.44981
	0.42708	0.34752	0.09633	0.44875
	0.4275	0.35696	0.09706	0.44285
	0.42792	0.38248	0.09699	0.44571
	0.42833	0.38022	0.09678	0.44642
	0.42875	0.3908	0.09668	0.44866
	0.42917	0.38114	0.09734	0.44956
	0.42958	0.37468	0.09753	0.44912
	0.43	0.38329	0.09772	0.44669
	0.43042	0.37753	0.09718	0.44617
	0.43083	0.36461	0.0973	0.4479
	0.43125	0.3691	0.09771	0.44985
	0.43167	0.3796	0.09786	0.44889
	0.43208	0.37934	0.0987	0.44545
	0.4325	0.40432	0.09824	0.44156
	0.43292	0.42113	0.09774	0.44106
	0.43333	0.40647	0.09765	0.4385
	0.43375	0.38182	0.09738	0.44133
	0.43417	0.37999	0.09733	0.445
	0.43458	0.38426	0.09767	0.44468
	0.435	0.38762	0.09819	0.44298
	0.43542	0.39382	0.09787	0.44367
	0.43583	0.37336	0.0982	0.44538
	0.43625	0.38775	0.09811	0.4471
	0.43667	0.38854	0.09818	0.44392
	0.43708	0.38506	0.09876	0.44265
	0.4375	0.38369	0.09847	0.44263
	0.43792	0.37226	0.09835	0.44229
	0.43833	0.36207	0.09801	0.44216
	0.43875	0.38184	0.09772	0.44686
	0.43917	0.4023	0.09762	0.44233
	0.43958	0.41578	0.09815	0.44746
	0.44	0.40507	0.0983	0.4474
	0.44042	0.39787	0.09665	0.44337
	0.44083	0.4205	0.09711	0.44267
	0.44125	0.34637	0.09729	0.44061
	0.44167	0.35962	0.09687	0.43914
	0.44208	0.35461	0.09636	0.44253
	0.4425	0.35329	0.09626	0.43999
	0.44292	0.34991	0.09598	0.43733
	0.44333	0.35747	0.09652	0.43755
	0.44375	0.34175	0.09724	0.43956
	0.44417	0.33954	0.09707	0.43647
	0.44458	0.36734	0.09647	0.43741
	0.445	0.37818	0.09817	0.44155
	0.44542	0.38289	0.09833	0.44322
	0.44583	0.43022	0.09828	0.43901
	0.44625	0.4193	0.09824	0.44075
	0.44667	0.42574	0.09783	0.4413
	0.44708	0.4047	0.09729	0.44188
	0.4475	0.39421	0.09742	0.44388
	0.44792	0.38083	0.09785	0.44431
	0.44833	0.36466	0.09778	0.44506
	0.44875	0.35719	0.09704	0.44437
	0.44917	0.3881	0.0969	0.44148
	0.44958	0.38438	0.09688	0.43891
	0.45	0.37575	0.09796	0.43436
	0.45042	0.39924	0.09809	0.43621
	0.45083	0.39889	0.09812	0.43759
	0.45125	0.40005	0.09785	0.43802
	0.45167	0.39991	0.09771	0.44077
	0.45208	0.41163	0.09769	0.43708
	0.4525	0.38964	0.09825	0.43418
	0.45292	0.40081	0.09791	0.43713
	0.45333	0.36585	0.09788	0.43787
	0.45375	0.36516	0.09807	0.43436
	0.45417	0.4059	0.09796	0.43728
	0.45458	0.38369	0.09795	0.43988
	0.455	0.38102	0.09724	0.43719
	0.45542	0.3794	0.09733	0.43008
	0.45583	0.3703	0.09722	0.43031
	0.45625	0.37209	0.09844	0.42754
	0.45667	0.36476	0.09845	0.42793
	0.45708	0.36836	0.09939	0.43049
	0.4575	0.39019	0.09884	0.43772
	0.45792	0.36022	0.09828	0.43542
	0.45833	0.35823	0.09765	0.42999
	0.45875	0.37987	0.09821	0.43044
	0.45917	0.38076	0.09835	0.43306
	0.45958	0.36669	0.09899	0.43213
	0.46	0.38232	0.09949	0.43273
	0.46042	0.37977	0.09859	0.43049
	0.46083	0.37307	0.09769	0.42983
	0.46125	0.37829	0.09851	0.42932
	0.46167	0.39035	0.09808	0.42776
	0.46208	0.36692	0.09764	0.428
	0.4625	0.37066	0.09838	0.43426
	0.46292	0.36738	0.09876	0.42787
	0.46333	0.36223	0.09734	0.43115
	0.46375	0.39019	0.09825	0.42761
	0.46417	0.39014	0.09774	0.4262
	0.46458	0.38875	0.09802	0.42955
	0.465	0.38886	0.09854	0.43412
	0.46542	0.40482	0.09758	0.43146
	0.46583	0.31102	0.09789	0.42806
	0.46625	0.25493	0.09806	0.42961
	0.46667	0.29656	0.09727	0.43389
	0.46708	0.33279	0.09765	0.43197
	0.4675	0.36717	0.09883	0.43118
	0.46792	0.39515	0.09862	0.42641
	0.46833	0.38045	0.0986	0.42506
	0.46875	0.38586	0.099	0.42634
	0.46917	0.39988	0.09917	0.43065
	0.46958	0.40312	0.09894	0.42824
	0.47	0.3963	0.09862	0.42808
	0.47042	0.37895	0.09842	0.42898
	0.47083	0.39808	0.09831	0.42526
	0.47125	0.38771	0.0993	0.42669
	0.47167	0.37993	0.09832	0.42765
	0.47208	0.38647	0.09872	0.4235
	0.4725	0.36502	0.09959	0.42761
	0.47292	0.32309	0.09829	0.42929
	0.47333	0.32888	0.09891	0.42764
	0.47375	0.34661	0.09929	0.42357
	0.47417	0.36763	0.0981	0.42516
	0.47458	0.39395	0.09871	0.4239
	0.475	0.39109	0.09912	0.42504
	0.47542	0.39824	0.0987	0.42376
	0.47583	0.37591	0.09777	0.423
	0.47625	0.39369	0.09952	0.42029
	0.47667	0.35505	0.09911	0.42407
	0.47708	0.3468	0.09893	0.42518
	0.4775	0.36605	0.09932	0.42778
	0.47792	0.36976	0.09829	0.42277
	0.47833	0.35568	0.09914	0.41943
	0.47875	0.35098	0.09959	0.42306
	0.47917	0.35501	0.09937	0.42276
	0.47958	0.35803	0.09859	0.42355
	0.48	0.3625	0.09927	0.42386
	0.48042	0.35619	0.09936	0.42861
	0.48083	0.35826	0.09954	0.42743
	0.48125	0.39465	0.09869	0.42474
	0.48167	0.37707	0.09919	0.4242
	0.48208	0.37383	0.09921	0.4208
	0.4825	0.33705	0.09863	0.41837
	0.48292	0.35309	0.09914	0.423
	0.48333	0.36629	0.09925	0.42351
	0.48375	0.35568	0.09926	0.41994
	0.48417	0.59325	0.09915	0.41736
	0.48458	0.97609	0.09969	0.41908
	0.485	1.1786	0.09963	0.41795
	0.48542	1.1998	0.09927	0.41599
	0.48583	0.76834	0.0981	0.41537
	0.48625	0.721	0.09847	0.41681
	0.48667	0.70685	0.09916	0.41677
	0.48708	0.73383	0.09979	0.42313
	0.4875	0.72934	0.09971	0.42017
	0.48792	0.71429	0.10021	0.41765
	0.48833	0.46225	0.09945	0.42341
	0.48875	0.25871	0.09948	0.42334
	0.48917	0.26225	0.09865	0.42138
	0.48958	0.24605	0.09874	0.41828
	0.49	0.42028	0.09799	0.41525
	0.49042	0.41109	0.09935	0.4213
	0.49083	0.42333	0.09992	0.41985
	0.49125	0.29361	0.09988	0.41863
	0.49167	0.52847	0.09939	0.41651
	0.49208	0.51797	0.09938	0.41469
	0.4925	0.52116	0.09887	0.41444
	0.49292	0.55188	0.09859	0.41657
	0.49333	0.56346	0.0978	0.41446
	0.49375	0.56364	0.09843	0.41778
	0.49417	0.5536	0.09788	0.42203
	0.49458	0.47074	0.09814	0.41914
	0.495	0.28065	0.09862	0.41911
	0.49542	0.24217	0.09866	0.42029
	0.49583	0.27881	0.09923	0.41662
	0.49625	0.44298	0.09988	0.41625
	0.49667	0.4883	0.10006	0.41627
	0.49708	0.49393	0.10054	0.41449
	0.4975	0.31698	0.09906	0.41162
	0.49792	0.3114	0.09879	0.41484
	0.49833	0.43998	0.09896	0.41577
	0.49875	0.4609	0.09919	0.41555
	0.49917	0.45169	0.09888	0.41601
	0.49958	0.4657	0.09869	0.41777
	0.5	0.48253	0.09837	0.41631
	0.50042	0.45932	0.09921	0.41268
	0.50083	0.43325	0.09891	0.41133
	0.50125	0.30511	0.09951	0.41206
	0.50167	0.2447	0.0997	0.41815
	0.50208	0.26812	0.09944	0.41735
	0.5025	0.29927	0.09941	0.41411
	0.50292	0.23822	0.09923	0.41221
	0.50333	0.19289	0.09848	0.41225
	0.50375	0.16221	0.09917	0.40994
	0.50417	0.14801	0.10036	0.41222
	0.50458	0.15097	0.10017	0.41037
	0.505	0.16107	0.10032	0.40994
	0.50542	0.15235	0.09963	0.41142
	0.50583	0.16624	0.09898	0.41398
	0.50625	0.21025	0.0996	0.41611
	0.50667	0.17932	0.0997	0.41099
	0.50708	0.16694	0.09913	0.4123
	0.5075	0.15757	0.09998	0.41013
	0.50792	0.14541	0.10063	0.40917
	0.50833	0.13875	0.10018	0.40999
	0.50875	0.14551	0.09896	0.41192
	0.50917	0.15263	0.10013	0.41472
	0.50958	0.14998	0.09938	0.41232
	0.51	0.14636	0.09862	0.4083
	0.51042	0.14942	0.09898	0.40832
	0.51083	0.1649	0.10073	0.40925
	0.51125	0.1511	0.10023	0.40782
	0.51167	0.13947	0.10092	0.40837
	0.51208	0.13382	0.10098	0.40901
	0.5125	0.13731	0.1013	0.40848
	0.51292	0.15046	0.10019	0.40999
	0.51333	0.14671	0.1003	0.40982
	0.51375	0.27634	0.10065	0.40548
	0.51417	0.23203	0.09934	0.40883
	0.51458	0.27082	0.09861	0.41018
	0.515	0.27783	0.09954	0.40569
	0.51542	0.30307	0.10012	0.40867
	0.51583	0.28527	0.09963	0.4069
	0.51625	0.2321	0.09994	0.40676
	0.51667	0.20015	0.09885	0.4093
	0.51708	0.24719	0.09939	0.40681
	0.5175	0.30833	0.09915	0.40619
	0.51792	0.24968	0.10045	0.40389
	0.51833	0.19534	0.09961	0.4083
	0.51875	0.16154	0.0999	0.40662
	0.51917	0.14597	0.10063	0.40762
	0.51958	0.14169	0.09972	0.40675
	0.52	0.14269	0.09967	0.40561
	0.52042	0.14303	0.09914	0.40574
	0.52083	0.1424	0.10036	0.40497
	0.52125	0.14018	0.10061	0.40464
	0.52167	0.14071	0.10016	0.40305
	0.52208	0.14296	0.0998	0.40549
	0.5225	0.14126	0.10061	0.40641
	0.52292	0.14167	0.10085	0.40509
	0.52333	0.14144	0.1018	0.40662
	0.52375	0.14196	0.10017	0.40336
	0.52417	0.14073	0.10081	0.40426
	0.52458	0.14065	0.10058	0.40734
	0.525	0.14115	0.10045	0.40884
	0.52542	0.14064	0.10098	0.40505
	0.52583	0.14172	0.1003	0.4039
	0.52625	0.14255	0.10091	0.40182
	0.52667	0.14178	0.10088	0.39991
	0.52708	0.13985	0.09974	0.39769
	0.5275	0.14165	0.09995	0.39965
	0.52792	0.14328	0.10096	0.39765
	0.52833	0.1433	0.1003	0.40152
	0.52875	0.1509	0.10003	0.40559
	0.52917	0.1489	0.10052	0.40355
	0.52958	0.16466	0.10022	0.40402
	0.53	0.16879	0.10044	0.4017
	0.53042	0.1976	0.10149	0.39913
	0.53083	0.17415	0.101	0.39884
	0.53125	0.16135	0.10097	0.39911
	0.53167	0.15378	0.10026	0.40014
	0.53208	0.19923	0.10157	0.40283
	0.5325	0.24258	0.10079	0.39925
	0.53292	0.22955	0.10071	0.39873
	0.53333	0.19136	0.10005	0.39721
	0.53375	0.17501	0.09985	0.39887
	0.53417	0.16516	0.10025	0.40032
	0.53458	0.16153	0.10001	0.40483
	0.535	0.15745	0.09952	0.40131
	0.53542	0.15144	0.09942	0.40582
	0.53583	0.14641	0.10042	0.40286
	0.53625	0.14164	0.09987	0.40167
	0.53667	0.14581	0.10128	0.39976
	0.53708	0.14536	0.10087	0.4036
	0.5375	0.14075	0.0998	0.40434
	0.53792	0.13898	0.10036	0.39914
	0.53833	0.13786	0.10012	0.39638
	0.53875	0.13657	0.10072	0.40012
	0.53917	0.13881	0.09953	0.40029
	0.53958	0.14064	0.10034	0.39643
	0.54	0.1375	0.10089	0.39929
	0.54042	0.13306	0.10101	0.40009
	0.54083	0.13323	0.10102	0.39723
	0.54125	0.1311	0.10109	0.39746
	0.54167	0.13274	0.10119	0.3948
	0.54208	0.13355	0.10048	0.39443
	0.5425	0.13101	0.10064	0.39584
	0.54292	0.13113	0.10009	0.39455
	0.54333	0.1332	0.10155	0.39356
	0.54375	0.13311	0.10042	0.39783
	0.54417	0.13237	0.10075	0.4009
	0.54458	0.13229	0.10151	0.39909
	0.545	0.13132	0.10026	0.39645
	0.54542	0.12942	0.10076	0.39551
	0.54583	0.13032	0.10039	0.39272
	0.54625	0.13044	0.10089	0.39496
	0.54667	0.13117	0.10145	0.39666
	0.54708	0.12947	0.10075	0.39509
	0.5475	0.13033	0.10224	0.39393
	0.54792	0.12874	0.10082	0.39335
	0.54833	0.12964	0.10192	0.3922
	0.54875	0.12882	0.10176	0.39218
	0.54917	0.12764	0.10113	0.39592
	0.54958	0.12835	0.10089	0.39176
	0.55	0.12812	0.10164	0.39214
	0.55042	0.12729	0.10262	0.39245
	0.55083	0.12811	0.10156	0.39441
	0.55125	0.1275	0.10207	0.39335
	0.55167	0.12691	0.10202	0.39686
	0.55208	0.12738	0.10165	0.39628
	0.5525	0.1272	0.10069	0.39643
	0.55292	0.12718	0.10109	0.39573
	0.55333	0.12784	0.10099	0.39341
	0.55375	0.12596	0.10104	0.39495
	0.55417	0.12641	0.10203	0.3915
	0.55458	0.12654	0.10146	0.39342
	0.555	0.12738	0.10134	0.39026
	0.55542	0.12757	0.10184	0.38983
	0.55583	0.12689	0.10212	0.39112
	0.55625	0.12757	0.1017	0.39023
	0.55667	0.12728	0.10083	0.39446
	0.55708	0.12748	0.1009	0.39169
	0.5575	0.12789	0.10132	0.39167
	0.55792	0.12663	0.10144	0.39103
	0.55833	0.12715	0.1017	0.39368
	0.55875	0.12718	0.10081	0.39269
	0.55917	0.13057	0.10147	0.39208
	0.55958	0.12867	0.10132	0.39152
	0.56	0.12887	0.10111	0.39458
	0.56042	0.1281	0.10082	0.38923
	0.56083	0.12624	0.10126	0.3864
	0.56125	0.12609	0.10091	0.38978
	0.56167	0.12487	0.10039	0.3884
	0.56208	0.12654	0.09961	0.39096
	0.5625	0.12541	0.10033	0.39071
	0.56292	0.12632	0.10049	0.39036
	0.56333	0.12529	0.10093	0.38742
	0.56375	0.12567	0.10208	0.38743
	0.56417	0.12552	0.10116	0.38697
	0.56458	0.12524	0.10183	0.39077
	0.565	0.12601	0.10102	0.38838
	0.56542	0.12685	0.10196	0.38659
	0.56583	0.12792	0.1008	0.38753
	0.56625	0.12577	0.10122	0.3849
	0.56667	0.12692	0.10215	0.38372
	0.56708	0.12571	0.10193	0.38619
	0.5675	0.12539	0.10108	0.39092
	0.56792	0.12597	0.10227	0.38833
	0.56833	0.12496	0.10116	0.39064
	0.56875	0.1262	0.10049	0.39026
	0.56917	0.12454	0.10111	0.39047
	0.56958	0.12369	0.10202	0.38965
	0.57	0.12601	0.10178	0.38787
	0.57042	0.12498	0.10171	0.38702
	0.57083	0.12556	0.10082	0.38869
	0.57125	0.12384	0.10234	0.39014
	0.57167	0.12522	0.10134	0.39115
	0.57208	0.12431	0.10151	0.38729
	0.5725	0.12443	0.10203	0.38403
	0.57292	0.12507	0.10241	0.38334
	0.57333	0.12552	0.10185	0.3846
	0.57375	0.12436	0.10207	0.38402
	0.57417	0.12558	0.10238	0.3833
	0.57458	0.12428	0.10193	0.38694
	0.575	0.12457	0.10246	0.38417
	0.57542	0.12576	0.10278	0.3812
	0.57583	0.12488	0.10223	0.38328
	0.57625	0.1238	0.10275	0.38232
	0.57667	0.12405	0.10215	0.38322
	0.57708	0.12407	0.10285	0.38577
	0.5775	0.12472	0.1014	0.38755
	0.57792	0.12364	0.10099	0.38534
	0.57833	0.124	0.10241	0.38212
	0.57875	0.12546	0.10063	0.38183
	0.57917	0.12333	0.1019	0.37897
	0.57958	0.12557	0.10139	0.37968
	0.58	0.12295	0.10197	0.38135
	0.58042	0.12488	0.10068	0.38491
	0.58083	0.12492	0.102	0.38138
	0.58125	0.12476	0.10205	0.38192
	0.58167	0.12435	0.10053	0.38271
	0.58208	0.12485	0.10225	0.3829
	0.5825	0.12404	0.10201	0.38168
	0.58292	0.12268	0.10155	0.37994
	0.58333	0.12377	0.10229	0.38043
	0.58375	0.12386	0.10166	0.38177
	0.58417	0.12409	0.10161	0.38418
	0.58458	0.12401	0.10237	0.38301
	0.585	0.12494	0.10193	0.38381
	0.58542	0.12428	0.10245	0.38322
	0.58583	0.12327	0.10172	0.38033
	0.58625	0.12507	0.10221	0.38277
	0.58667	0.12443	0.10203	0.38397
	0.58708	0.12285	0.10195	0.38302
	0.5875	0.12474	0.10351	0.38351
	0.58792	0.12336	0.10322	0.38258
	0.58833	0.12316	0.10307	0.38005
	0.58875	0.12484	0.1033	0.37932
	0.58917	0.12379	0.10298	0.37762
	0.58958	0.12258	0.10263	0.38385
	0.59	0.12441	0.10373	0.38328
	0.59042	0.12472	0.10238	0.37826
	0.59083	0.12421	0.1007	0.37481
	0.59125	0.12395	0.10118	0.37987
	0.59167	0.12531	0.10225	0.37905
	0.59208	0.12383	0.10261	0.37633
	0.5925	0.12384	0.10254	0.37777
	0.59292	0.12529	0.10163	0.37966
	0.59333	0.12501	0.10211	0.38043
	0.59375	0.12314	0.10161	0.37994
	0.59417	0.1249	0.10214	0.37937
	0.59458	0.12574	0.10221	0.38123
	0.595	0.12411	0.10239	0.38218
	0.59542	0.12397	0.10229	0.38244
	0.59583	0.12514	0.10192	0.3819
	0.59625	0.1238	0.10148	0.3799
	0.59667	0.12496	0.10132	0.38273
	0.59708	0.12546	0.10122	0.37865
	0.5975	0.12355	0.10138	0.38476
	0.59792	0.12409	0.10241	0.38217
	0.59833	0.12555	0.10209	0.3804
	0.59875	0.12352	0.1024	0.38456
	0.59917	0.1255	0.10239	0.379
	0.59958	0.12433	0.10254	0.37736
	0.6	0.12577	0.10261	0.37748
	0.60042	0.12458	0.10284	0.37538
	0.60083	0.12523	0.10348	0.3725
	0.60125	0.12543	0.10269	0.37404
	0.60167	0.12292	0.10359	0.37393
	0.60208	0.12523	0.10233	0.37655
	0.6025	0.12429	0.10197	0.37812
	0.60292	0.12444	0.10219	0.37494
	0.60333	0.1238	0.10261	0.37734
	0.60375	0.1235	0.10307	0.37676
	0.60417	0.12383	0.10243	0.37316
	0.60458	0.12398	0.10304	0.36916
	0.605	0.1241	0.10253	0.36965
	0.60542	0.12459	0.103	0.37411
	0.60583	0.12421	0.10196	0.37735
	0.60625	0.12479	0.10209	0.377
	0.60667	0.12409	0.10241	0.37721
	0.60708	0.12385	0.10289	0.373
	0.6075	0.1254	0.10226	0.37612
	0.60792	0.12513	0.10267	0.37745
	0.60833	0.12414	0.1036	0.37335
	0.60875	0.12371	0.10366	0.3732
	0.60917	0.12531	0.10252	0.37551
	0.60958	0.1242	0.10241	0.3762
	0.61	0.12494	0.10198	0.3746
	0.61042	0.1239	0.10332	0.37543
	0.61083	0.12494	0.10395	0.37293
	0.61125	0.12447	0.10257	0.37451
	0.61167	0.12492	0.1039	0.37092
	0.61208	0.12361	0.10211	0.37351
	0.6125	0.12393	0.10281	0.37188
	0.61292	0.12534	0.10272	0.37327
	0.61333	0.12592	0.10134	0.37561
	0.61375	0.1242	0.10287	0.37481
	0.61417	0.12514	0.10261	0.37594
	0.61458	0.12576	0.10391	0.37281
	0.615	0.1247	0.10305	0.37084
	0.61542	0.1239	0.10314	0.37158
	0.61583	0.12544	0.10257	0.37312
	0.61625	0.12526	0.10234	0.37272
	0.61667	0.12512	0.10194	0.37092
	0.61708	0.12657	0.10294	0.37031
	0.6175	0.12535	0.10353	0.37238
	0.61792	0.12446	0.10304	0.37506
	0.61833	0.12588	0.10267	0.37406
	0.61875	0.12492	0.10309	0.37266
	0.61917	0.12541	0.10303	0.37004
	0.61958	0.12393	0.10124	0.37028
	0.62	0.1258	0.10253	0.36937
	0.62042	0.12323	0.10366	0.37443
	0.62083	0.12472	0.10306	0.37126
	0.62125	0.12495	0.10309	0.36821
	0.62167	0.12398	0.10256	0.37258
	0.62208	0.12396	0.1027	0.37162
	0.6225	0.12532	0.10282	0.37384
	0.62292	0.12471	0.10228	0.36725
	0.62333	0.12516	0.1022	0.36859
	0.62375	0.12393	0.10258	0.36638
	0.62417	0.12635	0.1027	0.37129
	0.62458	0.12551	0.10274	0.37284
	0.625	0.12514	0.10279	0.37146
	0.62542	0.12438	0.1031	0.37399
	0.62583	0.12544	0.10457	0.37415
	0.62625	0.12615	0.10418	0.37258
	0.62667	0.12452	0.10338	0.37057
	0.62708	0.12583	0.10339	0.37131
	0.6275	0.12545	0.10432	0.37458
	0.62792	0.1256	0.1033	0.3686
	0.62833	0.12579	0.10344	0.36725
	0.62875	0.12501	0.10349	0.36706
	0.62917	0.12487	0.10355	0.37145
	0.62958	0.12539	0.10422	0.37178
	0.63	0.12467	0.10339	0.3751
	0.63042	0.12513	0.10307	0.37197
	0.63083	0.12616	0.10431	0.37175
	0.63125	0.12567	0.10376	0.37111
	0.63167	0.12627	0.10389	0.37021
	0.63208	0.12533	0.104	0.36719
	0.6325	0.12469	0.10431	0.36695
	0.63292	0.12483	0.10327	0.36738
	0.63333	0.1261	0.10405	0.36837
	0.63375	0.12516	0.10357	0.37148
	0.63417	0.12462	0.10279	0.37249
	0.63458	0.12565	0.1025	0.37183
	0.635	0.12522	0.10258	0.37002
	0.63542	0.12507	0.10161	0.37011
	0.63583	0.1252	0.10345	0.37235
	0.63625	0.1254	0.10429	0.36874
	0.63667	0.12572	0.10426	0.36831
	0.63708	0.12575	0.10417	0.36688
	0.6375	0.12605	0.10338	0.36872
	0.63792	0.12517	0.10279	0.3666
	0.63833	0.12544	0.10302	0.36491
	0.63875	0.12496	0.10247	0.36931
	0.63917	0.12928	0.10295	0.36648
	0.63958	0.12818	0.10288	0.36484
	0.64	0.12242	0.10417	0.3633
	0.64042	0.12977	0.10414	0.36426
	0.64083	0.1235	0.10254	0.3626
	0.64125	0.12111	0.10161	0.36112
	0.64167	0.11916	0.101	0.36068
	0.64208	0.11843	0.10024	0.3625
	0.6425	0.12354	0.10112	0.36617
	0.64292	0.12628	0.10071	0.36711
	0.64333	0.12943	0.10116	0.36486
	0.64375	0.12659	0.10159	0.36366
	0.64417	0.12122	0.10143	0.36494
	0.64458	0.12263	0.10142	0.36289
	0.645	0.12403	0.10187	0.36173
	0.64542	0.11975	0.10135	0.35806
	0.64583	0.12475	0.10183	0.35917
	0.64625	0.12619	0.10187	0.35968
	0.64667	0.12822	0.10281	0.35991
	0.64708	0.12947	0.10198	0.36069
	0.6475	0.13219	0.10208	0.36147
	0.64792	0.1315	0.10314	0.36284
	0.64833	0.13441	0.10296	0.3627
	0.64875	0.13287	0.10254	0.36005
	0.64917	0.13239	0.10305	0.36022
	0.64958	0.13107	0.10337	0.36265
	0.65	0.13109	0.10306	0.36205
	0.65042	0.13232	0.10278	0.35838
	0.65083	0.13048	0.10223	0.35872
	0.65125	0.12664	0.10386	0.35956
	0.65167	0.12407	0.1032	0.35851
	0.65208	0.12193	0.10392	0.36194
	0.6525	0.12003	0.10295	0.36245
	0.65292	0.12354	0.10278	0.35979
	0.65333	0.12658	0.10244	0.35702
	0.65375	0.12988	0.10222	0.36127
	0.65417	0.1287	0.10232	0.36154
	0.65458	0.13074	0.10186	0.36177
	0.655	0.12887	0.10216	0.36114
	0.65542	0.12893	0.10287	0.35958
	0.65583	0.13087	0.10326	0.36058
	0.65625	0.12861	0.10252	0.36153
	0.65667	0.12803	0.10212	0.36185
	0.65708	0.12463	0.10245	0.36318
	0.6575	0.12459	0.10228	0.36011
	0.65792	0.1281	0.10269	0.35989
	0.65833	0.12946	0.10223	0.36196
	0.65875	0.13092	0.10358	0.36228
	0.65917	0.1297	0.103	0.36075
	0.65958	0.12497	0.10334	0.35806
	0.66	0.12364	0.10302	0.36029
	0.66042	0.1211	0.10372	0.36189
	0.66083	0.12094	0.10408	0.35783
	0.66125	0.11704	0.1042	0.3592
	0.66167	0.11917	0.10338	0.35797
	0.66208	0.11677	0.1037	0.35884
	0.6625	0.11633	0.10266	0.35559
	0.66292	0.11629	0.10396	0.35516
	0.66333	0.11621	0.10326	0.35513
	0.66375	0.11563	0.10309	0.35624
	0.66417	0.11549	0.10333	0.36149
	0.66458	0.1145	0.10267	0.36081
	0.665	0.11451	0.10371	0.362
	0.66542	0.11366	0.10436	0.3625
	0.66583	0.11511	0.10376	0.36338
	0.66625	0.11366	0.10403	0.36588
	0.66667	0.11376	0.10336	0.36412
	0.66708	0.11563	0.10207	0.36214
	0.6675	0.11334	0.10221	0.35975
	0.66792	0.11363	0.10263	0.35856
	0.66833	0.11489	0.10229	0.35577
	0.66875	0.11255	0.10337	0.35409
	0.66917	0.11333	0.10389	0.35593
	0.66958	0.11268	0.10343	0.35779
	0.67	0.11332	0.10337	0.35585
	0.67042	0.11244	0.10412	0.35572
	0.67083	0.11294	0.1036	0.35529
	0.67125	0.11274	0.10324	0.35383
	0.67167	0.10153	0.10392	0.35611
	0.67208	0.09407	0.1044	0.35441
	0.6725	0.08326	0.1063	0.35476
	0.67292	0.07431	0.10509	0.35217
	0.67333	0.06737	0.10576	0.35499
	0.67375	0.06649	0.10382	0.35674
	0.67417	0.06284	0.10154	0.35527
	0.67458	0.06296	0.10217	0.35226
	0.675	0.06017	0.10154	0.35417
	0.67542	0.06142	0.10122	0.3519
	0.67583	0.06265	0.10265	0.35383
	0.67625	0.05801	0.10249	0.35326
	0.67667	0.05505	0.1013	0.35504
	0.67708	0.05348	0.10175	0.35217
	0.6775	0.05274	0.10164	0.35545
	0.67792	0.05083	0.10205	0.35365
	0.67833	0.05029	0.1019	0.35224
	0.67875	0.05149	0.10216	0.3537
	0.67917	432.832	0.10227	0.35378
	0.67958	374.504	0.10291	0.3552
	0.68	188.09	92.0453	0.35105
	0.68042	109.621	86.4218	0.34975
	0.68083	90.2576	81.0982	0.34677
	0.68125	83.9065	81.8798	0.34763
	0.68167	81.4605	81.4984	140.163
	0.68208	79.9591	79.9437	103.056
	0.6825	78.7018	80.9824	116.299
	0.68292	77.8538	77.9006	252.204
	0.68333	76.0165	79.2524	178.784
	0.68375	75.5952	77.6697	139.242
	0.68417	73.8947	79.0099	119.205
	0.68458	73.0329	76.2993	115.506
	0.685	71.6911	75.3236	108.769
	0.68542	71.6637	75.8039	107.315
	0.68583	70.5631	74.8151	105.511
	0.68625	69.399	71.9567	98.804
	0.68667	68.0375	72.5326	103.559
	0.68708	67.7824	71.6818	98.3441
	0.6875	66.7895	70.6872	97.3446
	0.68792	66.4602	70.3152	98.1979
	0.68833	65.0852	67.6834	96.2766
	0.68875	64.5261	66.0856	97.1378
	0.68917	63.7918	66.6013	92.1841
	0.68958	62.7019	66.7342	92.2343
	0.69	62.2287	66.0301	90.8969
	0.69042	62.0419	64.5522	90.4821
	0.69083	60.8409	63.8595	87.2554
	0.69125	60.0707	61.8378	87.638
	0.69167	59.3195	63.6579	86.1736
	0.69208	58.915	62.9278	83.0602
	0.6925	58.1813	62.4356	83.3721
	0.69292	58.0395	61.8783	84.3012
	0.69333	56.8045	60.4972	80.8907
	0.69375	56.4331	60.6815	79.0277
	0.69417	55.4183	61.002	80.3823
	0.69458	55.1868	58.7253	77.8322
	0.695	54.5575	58.5437	77.3323
	0.69542	53.952	57.8004	74.4354
	0.69583	53.3615	57.4054	74.6585
	0.69625	53.0114	57.1974	78.4545
	0.69667	52.1623	56.0939	76.8856
	0.69708	52.5705	56.1713	72.7905
	0.6975	51.7953	56.5815	73.8481
	0.69792	50.9778	55.6191	71.5868
	0.69833	50.8086	54.9146	74.4692
	0.69875	49.9782	53.8436	70.9495
	0.69917	49.2859	54.7844	71.8596
	0.69958	48.5701	53.1804	68.919
	0.7	48.5359	52.6257	68.6485
	0.70042	47.7566	52.6794	67.1121
	0.70083	47.6983	50.5196	68.379
	0.70125	47.14	50.6884	66.6815
	0.70167	45.9885	50.629	65.8524
	0.70208	46.0934	50.0525	64.4708
	0.7025	45.8532	50.5727	65.9695
	0.70292	44.8536	49.8837	66.9294
	0.70333	44.7383	48.8706	64.0629
	0.70375	43.6315	48.2049	63.9201
	0.70417	43.4412	48.2184	64.8336
	0.70458	43.1156	47.663	63.4346
	0.705	42.5041	46.98	62.4619
	0.70542	41.6935	47.0379	62.8764
	0.70583	41.7388	45.6998	59.2764
	0.70625	41.106	46.0902	58.2352
	0.70667	40.6958	45.4671	59.4527
	0.70708	40.4269	43.6753	59.5549
	0.7075	40.0622	43.6264	58.0224
	0.70792	39.2484	43.141	54.8822
	0.70833	39.0697	43.4504	55.8667
	0.70875	38.7318	43.2845	53.5361
	0.70917	37.6156	42.8083	56.1435
	0.70958	37.6151	42.3213	55.9149
	0.71	37.9458	41.2493	53.1968
	0.71042	36.961	41.0948	55.4633
	0.71083	36.8169	41.1619	55.3773
	0.71125	36.2059	40.0343	51.269
	0.71167	35.8465	40.0203	50.662
	0.71208	35.2894	39.6995	53.0113
	0.7125	35.0279	39.2945	51.1227
	0.71292	34.9776	38.6658	50.3777
	0.71333	35.4384	38.9075	49.4398
	0.71375	33.8898	39.0475	50.1953
	0.71417	33.2218	38.2509	48.5594
	0.71458	33.1247	37.6267	47.5979
	0.715	32.613	37.111	48.6018
	0.71542	32.3736	36.8685	47.3309
	0.71583	32.359	36.7307	47.7206
	0.71625	31.6641	35.5633	47.1024
	0.71667	31.7254	35.5792	46.7084
	0.71708	31.0005	34.6019	46.5256
	0.7175	30.4991	35.3394	48.1072
	0.71792	30.5034	34.7949	46.0641
	0.71833	30.2983	34.4915	45.5531
	0.71875	29.9093	33.738	44.6227
	0.71917	29.7638	33.272	45.4683
	0.71958	29.4215	33.043	43.4197
	0.72	29.0026	32.9568	41.4353
	0.72042	28.6611	32.564	40.9678
	0.72083	28.1877	32.7815	41.6147
	0.72125	28.061	32.5882	40.5596
	0.72167	27.9216	32.2582	41.4117
	0.72208	27.4476	32.1173	39.6846
	0.7225	27.3704	30.9342	39.7771
	0.72292	27.0735	31.2333	39.4824
	0.72333	26.8439	30.9407	37.8108
	0.72375	26.6078	30.5254	39.4735
	0.72417	26.0762	30.8226	38.6066
	0.72458	25.8966	30.3953	38.6446
	0.725	25.9317	30.2268	38.8487
	0.72542	25.6729	29.7683	36.8279
	0.72583	25.2908	29.1404	38.4875
	0.72625	25.081	28.9223	37.0458
	0.72667	24.6937	28.7938	37.89
	0.72708	24.5398	28.681	36.0131
	0.7275	24.1322	27.8436	35.8208
	0.72792	23.9216	28.0696	35.6763
	0.72833	23.8247	27.3389	33.1969
	0.72875	23.5278	28.027	35.3767
	0.72917	23.2167	27.0082	34.6287
	0.72958	23.0705	27.1538	33.6466
	0.73	22.8663	26.5332	33.6794
	0.73042	22.8415	26.3707	33.0895
	0.73083	22.3807	26.5562	34.0521
	0.73125	22.0592	26.3244	34.2019
	0.73167	22.0575	25.9589	31.9289
	0.73208	21.6657	25.6019	31.8205
	0.7325	21.6457	25.5606	30.6146
	0.73292	21.5371	25.5243	31.5186
	0.73333	21.0314	24.9484	32.2377
	0.73375	21.0404	25.3163	30.8294
	0.73417	20.7167	24.8772	30.7136
	0.73458	20.5706	24.816	30.3048
	0.735	20.4701	24.7201	30.6301
	0.73542	20.3744	23.9549	30.8776
	0.73583	20.1702	23.9899	31.1215
	0.73625	19.8992	23.9231	30.5464
	0.73667	19.5395	23.8649	30.4994
	0.73708	19.4703	23.2615	29.7935
	0.7375	19.1833	23.2801	28.1514
	0.73792	19.3262	23.216	28.1413
	0.73833	19.053	22.4908	28.1097
	0.73875	18.9403	22.4481	28.6177
	0.73917	18.5491	22.0789	28.0912
	0.73958	18.339	21.8924	28.292
	0.74	18.2269	22.1053	27.6968
	0.74042	18.22	21.1332	28.3376
	0.74083	17.8177	21.2155	27.4211
	0.74125	17.6635	20.9723	27.0835
	0.74167	17.5661	20.7903	26.5115
	0.74208	17.3115	20.7612	26.613
	0.7425	17.3308	20.5091	25.378
	0.74292	17.0856	20.6135	25.0131
	0.74333	16.9343	19.9764	26.133
	0.74375	16.7926	20.3235	25.321
	0.74417	16.6477	20.3432	25.6837
	0.74458	16.5407	19.7992	25.511
	0.745	16.3363	19.8578	24.8009
	0.74542	16.2372	19.6373	24.2667
	0.74583	16.1066	19.8353	26.4811
	0.74625	15.8617	19.3141	24.5101
	0.74667	15.7898	19.313	25.4384
	0.74708	15.5392	18.8894	24.1717
	0.7475	15.6176	18.5102	24.0393
	0.74792	15.4955	18.2942	24.1646
	0.74833	15.3628	18.4708	23.5069
	0.74875	15.0341	18.6342	22.6317
	0.74917	14.9851	18.4041	22.7343
	0.74958	14.8221	18.1649	22.315
	0.75	14.5982	18.3867	22.0725
	0.75042	14.7433	17.8349	23.2742
	0.75083	14.4839	17.8987	22.9812
	0.75125	14.2028	17.6365	21.9743
	0.75167	14.2054	17.6051	22.1561
	0.75208	14.1268	17.4472	21.003
	0.7525	13.8771	17.2872	21.8609
	0.75292	13.8572	17.0118	21.2603
	0.75333	13.5786	16.7497	21.9878
	0.75375	13.6073	17.0533	21.3137
	0.75417	13.561	17.0201	19.8999
	0.75458	13.3114	16.3751	21.0284
	0.755	13.2758	16.559	20.6906
	0.75542	13.0935	16.0757	19.4748
	0.75583	13.0734	16.062	20.104
	0.75625	12.9608	16.3962	19.9328
	0.75667	12.8679	16.3941	19.4312
	0.75708	12.9077	15.6602	19.4654
	0.7575	12.7223	15.5101	20.0941
	0.75792	12.4853	15.7638	19.2945
	0.75833	12.3926	15.5003	18.6336
	0.75875	12.3362	15.487	18.4688
	0.75917	12.384	15.2086	18.8138
	0.75958	12.1851	15.2482	19.0113
	0.76	12.1917	15.2264	18.9196
	0.76042	11.9103	15.0987	18.3263
	0.76083	11.7229	14.6877	18.7527
	0.76125	11.6913	14.3766	18.5758
	0.76167	11.6143	14.4998	18.1135
	0.76208	11.6062	14.4474	17.5308
	0.7625	11.4588	14.2155	17.8298
	0.76292	11.3406	13.9393	17.8842
	0.76333	11.2629	14.0977	17.9302
	0.76375	11.2931	14.0804	17.9516
	0.76417	11.0786	13.9439	18.1727
	0.76458	11.225	13.6706	17.2114
	0.765	11.1213	13.8299	17.9603
	0.76542	11.0237	13.5295	17.2366
	0.76583	10.78	13.6662	17.286
	0.76625	10.7229	13.3372	17.2979
	0.76667	10.6974	13.2669	16.8236
	0.76708	10.5724	13.0907	15.7957
	0.7675	10.5593	13.353	16.19
	0.76792	10.4457	12.8993	16.5656
	0.76833	10.367	13.1426	16.1509
	0.76875	10.2685	12.9049	16.2945
	0.76917	10.1872	13.0152	16.6603
	0.76958	10.1582	12.8693	15.8134
	0.77	10.0576	12.5069	16.2616
	0.77042	10.0599	12.6162	16.1808
	0.77083	9.62321	12.5996	15.8333
	0.77125	9.34804	12.6873	15.919
	0.77167	9.53364	12.3016	15.0634
	0.77208	9.49343	12.1182	15.0914
	0.7725	9.44088	9.78173	15.7155
	0.77292	9.38226	10.9531	14.2324
	0.77333	9.23382	10.9461	14.579
	0.77375	9.21878	11.0731	14.1663
	0.77417	9.28393	10.8838	13.9866
	0.77458	9.20339	10.9027	14.1885
	0.775	9.1247	10.8368	13.9649
	0.77542	9.20024	10.8571	14.3167
	0.77583	9.02424	10.8848	14.2346
	0.77625	8.82846	10.6076	13.4917
	0.77667	8.7326	10.5399	13.653
	0.77708	8.72763	10.444	13.8897
	0.7775	8.68594	10.5961	13.9763
	0.77792	8.62893	10.2536	13.9512
	0.77833	8.55875	10.3538	13.1439
	0.77875	8.49954	10.4067	12.6415
	0.77917	8.40636	10.5581	12.5467
	0.77958	8.39587	10.4494	13.3726
	0.78	8.23147	10.25	13.3085
	0.78042	8.16641	9.94526	13.0387
	0.78083	8.2656	9.97542	12.825
	0.78125	8.10906	9.97204	12.525
	0.78167	8.06334	9.73696	12.6888
	0.78208	8.0332	9.81506	12.407
	0.7825	7.96093	9.58665	12.058
	0.78292	7.89463	9.47869	12.6014
	0.78333	7.82606	9.59336	11.972
	0.78375	7.85022	9.64793	12.2179
	0.78417	7.8587	9.32266	12.2388
	0.78458	7.71239	9.362	12.4306
	0.785	7.64371	9.3121	12.6517
	0.78542	7.60587	9.4142	12.0536
	0.78583	7.56594	9.1906	11.3756
	0.78625	7.51186	9.14422	11.7125
	0.78667	7.46695	9.23745	12.257
	0.78708	7.3676	9.12863	11.7603
	0.7875	7.3949	9.07557	11.3867
	0.78792	7.33431	9.04421	11.6862
	0.78833	7.30204	8.97462	11.1791
	0.78875	7.19032	8.92819	11.4412
	0.78917	7.21369	8.8716	11.1979
	0.78958	7.16424	8.69621	11.0425
	0.79	7.21692	8.70835	10.7906
	0.79042	7.03023	8.49209	10.8487
	0.79083	7.00806	8.60582	11.0762
	0.79125	7.02851	8.52507	10.6442
	0.79167	6.87578	8.5567	10.4143
	0.79208	6.84254	8.41969	10.7249
	0.7925	7.00122	8.33704	10.4029
	0.79292	6.97318	8.2793	10.5402
	0.79333	6.83202	8.2574	10.2644
	0.79375	6.73984	8.24234	10.512
	0.79417	6.70905	8.15501	10.584
	0.79458	6.6068	8.09628	10.0583
	0.795	6.54479	8.22319	10.0761
	0.79542	6.49678	8.07403	10.5643
	0.79583	6.4767	8.19067	10.1086
	0.79625	6.44307	7.93524	10.1399
	0.79667	6.3834	7.90302	9.97547
	0.79708	6.32965	7.89867	9.60005
	0.7975	6.29644	7.93465	9.88739
	0.79792	6.22934	7.77309	9.68959
	0.79833	6.25286	7.90933	10.1995
	0.79875	6.20906	7.67157	10.3725
	0.79917	6.25187	7.5367	9.76622
	0.79958	6.21873	7.59453	9.89211
	0.8	6.14658	7.64654	9.77431
	0.80042	6.05857	7.58926	9.76325
	0.80083	6.07022	7.57511	9.43154
	0.80125	6.01347	7.43172	8.95139
	0.80167	5.86871	7.44832	9.38733
	0.80208	5.86863	7.24545	9.85243
	0.8025	5.90693	7.2039	9.38536
	0.80292	5.84173	7.28032	9.43843
	0.80333	5.72608	7.28628	9.52702
	0.80375	5.72582	7.17698	8.9418
	0.80417	5.67426	7.13792	9.29459
	0.80458	5.63261	7.07959	9.28675
	0.805	5.58873	7.14185	8.76416
	0.80542	5.59582	7.07592	8.62498
	0.80583	5.55725	6.9528	9.03386
	0.80625	5.57232	6.90595	9.08735
	0.80667	5.53317	6.8972	8.96199
	0.80708	5.54186	6.86647	8.67265
	0.8075	5.4965	6.73791	8.47445
	0.80792	5.50827	6.83793	8.85331
	0.80833	5.46676	6.92408	8.63282
	0.80875	5.50992	6.71962	8.50185
	0.80917	5.40309	6.60162	8.65352
	0.80958	5.34965	6.791	8.49255
	0.81	5.29195	6.55972	8.18751
	0.81042	5.31942	6.36622	8.61279
	0.81083	5.18738	6.40772	8.43855
	0.81125	5.16735	6.36222	8.45019
	0.81167	5.12236	6.5966	8.03635
	0.81208	5.02957	6.47456	7.92094
	0.8125	5.01068	6.46499	8.21973
	0.81292	4.98195	6.30284	8.05086
	0.81333	4.93506	6.41984	8.01862
	0.81375	4.97573	6.32068	8.07331
	0.81417	4.93013	6.19294	7.97166
	0.81458	4.88037	6.24907	8.19832
	0.815	5.00534	6.2523	8.40525
	0.81542	4.94635	6.21804	7.75988
	0.81583	4.92485	6.25255	7.84014
	0.81625	4.88894	6.14521	8.24239
	0.81667	4.86971	6.09738	7.71848
	0.81708	4.80289	5.97649	8.30281
	0.8175	4.78232	6.09737	7.68342
	0.81792	4.72321	5.98353	7.8982
	0.81833	4.65707	6.01228	7.76051
	0.81875	4.62214	6.078	7.61034
	0.81917	4.59772	5.97026	7.69711
	0.81958	4.54308	5.85362	7.47882
	0.82	4.55926	5.87233	7.37814
	0.82042	4.54458	5.89609	7.68253
	0.82083	4.52428	5.84788	7.41203
	0.82125	4.61997	5.76698	7.6483
	0.82167	4.56667	5.73104	7.56282
	0.82208	4.53442	5.68407	7.28243
	0.8225	4.52946	5.70501	7.07669
	0.82292	4.51769	5.68938	7.24648
	0.82333	4.5027	5.53328	7.21785
	0.82375	4.48014	5.60614	6.97326
	0.82417	4.46885	5.55255	7.11976
	0.82458	4.41678	5.60109	7.20425
	0.825	4.43644	5.4778	7.19752
	0.82542	4.48144	5.48776	6.85683
	0.82583	4.39276	5.38683	7.10607
	0.82625	4.35993	5.32692	7.13171
	0.82667	4.32791	5.41117	7.15599
	0.82708	4.33943	5.3881	6.96436
	0.8275	4.32214	5.28893	6.80809
	0.82792	4.3104	5.2182	6.96358
	0.82833	4.35695	5.27041	6.70365
	0.82875	4.32852	5.23552	6.87994
	0.82917	4.28545	5.29532	6.94662
	0.82958	4.23927	5.23901	6.50845
	0.83	4.26695	5.26744	6.98724
	0.83042	4.2507	5.11842	6.71537
	0.83083	4.23476	5.10422	6.73281
	0.83125	4.26819	5.17054	6.53591
	0.83167	4.21546	5.04059	6.46906
	0.83208	4.16849	5.08059	6.62345
	0.8325	4.07047	5.01839	6.25695
	0.83292	4.00236	4.99749	6.53906
[truncated: 89,823 more rows]

## Sheet: Panel C glucose current
Current production by L. plantarum in gMRS under different conditions.
Time (days)	uA/cm2	uA/cm2	uA/cm2			uA/cm2	uA/cm2	uA/cm2
0	16.1893	19.4329	19.5434	DHNA + Glucose		24.4848	35.2173	22.5978	Glucose no DHNA
0.000416667	12.8586	15.7975	12.4397			22.0204	26.845	21.4548
0.000833333	9.57294	14.0437	10.1136			18.2681	25.6634	19.4526
0.00125	7.99407	13.1761	8.93823			16.4096	24.5937	17.8866
0.00166667	7.78221	12.8886	8.70856			15.348	23.624	17.4556
0.00208333	5.75187	12.7013	8.01197			14.2955	23.3812	16.7422
0.0025	4.32034	12.2527	7.86611			14.3459	23.2157	16.091
0.00291667	5.11557	12.0387	7.86746			13.9281	22.7279	15.9309
0.00333333	4.88145	11.6752	7.727			14.076	22.223	15.7769
0.00375	4.5665	11.3983	7.59769			13.4239	22.2057	15.0458
0.00416667	5.88902	11.3321	7.46737			13.3893	21.6902	14.9316
0.00458333	5.2847	11.2622	7.559			13.2799	21.7969	14.3636
0.005	4.23409	11.1002	7.41749			13.187	21.9119	14.424
0.00541667	4.44694	10.9519	7.10521			12.8393	21.7792	13.7573
0.00583333	4.58199	10.667	6.98991			12.726	21.6326	13.7574
0.00625	3.3854	10.6789	7.03811			12.9036	21.0086	13.1753
0.00666667	3.84826	10.4997	6.97607			12.742	21.392	13.5917
0.00708333	3.09886	10.3812	6.82917			12.2829	20.8941	13.0858
0.0075	6.4162	10.2805	6.82091			12.3278	21.0049	13.1231
0.00791667	4.66174	9.99592	6.69298			12.3914	20.8678	12.7071
0.00833333	5.40751	9.90245	6.50654			11.9745	20.5431	12.5502
0.00875	5.07568	9.79399	6.46277			12.2066	20.4942	11.8271
0.00916667	5.08355	9.70355	6.31795			12.1612	20.4075	11.5583
0.00958333	3.67598	9.53169	6.46402			12.3714	20.2161	11.6869
0.01	4.60322	9.4297	6.33916			12.3238	20.1274	11.3898
0.0104167	5.19904	9.25749	6.2333			11.9461	20.1132	11.4826
0.0108333	3.79498	8.98303	6.18464			11.5182	20.0584	11.0328
0.01125	5.46867	8.7648	6.15917			11.466	19.9187	10.6789
0.0116667	5.88159	8.64547	6.07447			11.3966	19.9961	10.484
0.0120833	4.99505	8.59746	5.98849			11.3423	19.627	10.2295
0.0125	2.71257	8.48478	5.93374			11.023	19.7016	10.2222
0.0129167	3.83083	8.45348	5.79317			10.8275	19.4582	10.548
0.0133333	2.98257	8.39941	5.64147			10.8846	19.5161	10.0198
0.01375	3.79886	8.28993	5.67179			10.8771	19.5255	9.63933
0.0141667	3.19562	8.22742	5.65639			10.7265	19.4798	9.27286
0.0145833	3.3924	8.12941	5.65304			11.011	19.257	9.26971
0.015	4.02882	7.93888	5.38331			11.24	19.3689	8.97018
0.0154167	3.6678	7.92148	5.51674			11.3255	19.1495	8.91675
0.0158333	4.28542	7.79001	5.38338			11.2086	19.0645	8.63241
0.01625	4.10325	7.70154	5.37022			10.8311	18.9719	8.58387
0.0166667	2.72177	7.68209	5.30508			10.5881	18.933	8.64869
0.0170833	3.41898	7.56919	5.18479			10.9277	18.7127	8.46287
0.0175	4.26454	7.47532	5.04929			10.7013	18.7332	8.29766
0.0179167	4.51406	7.31734	5.06048			10.7647	18.6279	8.08059
0.0183333	3.87975	7.15466	5.10453			10.5011	18.8389	7.93358
0.01875	2.80392	7.17552	4.95945			10.5268	18.5261	7.93691
0.0191667	4.07851	7.02442	5.03174			10.6059	18.461	7.88768
0.0195833	5.1339	7.00744	4.97717			10.3481	18.6337	7.83189
0.02	4.80604	6.9213	5.01455			10.4442	18.638	7.58591
0.0204167	4.28642	6.84213	4.93162			11.0615	18.4407	7.41981
0.0208333	2.48211	6.79191	4.85054			11.898	18.4516	7.51876
0.02125	3.18765	6.66041	4.78357			12.1954	18.3437	7.35343
0.0216667	3.79933	6.56553	4.80887			12.4048	18.464	7.30095
0.0220833	4.685	6.56875	4.79927			12.5495	18.3419	7.29682
0.0225	3.84936	6.50422	4.74387			11.8819	18.2203	7.10677
0.0229167	3.15429	6.47569	4.5447			11.007	18.1606	7.0612
0.0233333	2.89873	6.29606	4.59045			10.5666	18.1824	6.93386
0.02375	3.36246	6.27676	4.51858			10.459	17.8679	6.96388
0.0241667	3.43027	6.27961	4.48375			10.1075	17.8867	6.87363
0.0245833	3.68298	6.21835	4.42862			9.98218	17.9223	6.89579
0.025	4.28281	6.18087	4.36693			9.89421	17.8406	6.78209
0.0254167	3.62092	6.00879	4.20087			10.1158	18.0002	6.70155
0.0258333	3.40486	6.03065	4.15277			9.98946	18.0068	6.62826
0.02625	3.25972	5.85141	4.14061			10.0177	17.8782	6.57976
0.0266667	3.82006	5.8381	4.17016			9.8201	17.8787	6.44501
0.0270833	3.20676	5.77102	4.25705			9.5372	17.5047	6.42967
0.0275	3.87822	5.76265	4.15729			9.6496	17.8071	6.41449
0.0279167	3.5369	5.66202	4.09536			9.67617	17.5062	6.2214
0.0283333	3.99519	5.64868	3.94354			9.40621	17.7856	6.23929
0.02875	3.74298	5.61568	3.86293			9.77385	17.4543	6.26245
0.0291667	2.40308	5.55688	3.89005			9.70872	17.4939	6.16595
0.0295833	3.18762	5.54309	3.86419			9.7413	17.2019	6.0393
0.03	2.82038	5.40647	3.89538			9.35599	17.1402	5.87801
0.0304167	2.77399	5.37917	3.8739			9.26612	17.2035	5.9001
0.0308333	3.82688	5.34928	3.75734			9.30246	17.3707	5.89485
0.03125	3.78489	5.32569	3.77567			9.22141	17.1111	5.97931
0.0316667	2.99681	5.28131	3.79941			8.96829	17.4119	5.91143
0.0320833	3.30542	5.18737	3.67354			9.15674	17.1138	5.76626
0.0325	2.77454	5.15554	3.58508			9.1983	17.4448	5.85582
0.0329167	2.85096	5.06513	3.59457			8.98963	17.3443	5.74609
0.0333333	2.7423	5.03306	3.57733			9.012	17.1355	5.69039
0.03375	3.04406	5.02156	3.57366			9.49539	17.1592	5.6338
0.0341667	2.54887	4.9993	3.51368			9.48371	17.0478	5.49292
0.0345833	2.96742	4.92647	3.53808			9.03752	17.1727	5.40441
0.035	3.45425	4.89402	3.54428			9.17828	17.1475	5.4745
0.0354167	3.13083	4.84786	3.4237			9.08714	17.368	5.32544
0.0358333	3.53354	4.84997	3.4048			9.59667	17.1884	5.40838
0.03625	3.40814	4.87952	3.37572			9.69415	16.8479	5.27067
0.0366667	3.31545	4.77101	3.33832			9.51036	17.0379	5.23577
0.0370833	3.36544	4.69186	3.33312			9.25051	16.9833	5.16714
0.0375	3.94379	4.74111	3.2828			8.98295	16.9795	5.15209
0.0379167	3.18411	4.63061	3.30779			9.34612	16.891	5.18639
0.0383333	3.74264	4.66302	3.33721			8.92354	16.9709	5.18414
0.03875	3.06107	4.64819	3.24307			8.774	16.8568	5.07658
0.0391667	2.94148	4.62742	3.25042			8.78153	16.9128	5.01911
0.0395833	3.77679	4.52463	3.21192			9.30873	16.6903	5.08677
0.04	3.28674	4.58651	3.18654			9.25527	16.819	5.02037
0.0404167	3.73651	4.51059	3.15175			9.32685	16.8196	4.90524
0.0408333	2.93411	4.49165	3.09363			9.25625	16.6875	4.91387
0.04125	2.88025	4.4315	3.04291			9.20452	16.584	4.88267
0.0416667	2.45773	4.37802	3.0249			9.29319	16.3811	4.81784
0.0420833	2.51884	4.37247	2.96933			9.23845	16.613	4.79523
0.0425	2.58226	4.31757	2.96395			9.26785	16.44	4.72153
0.0429167	2.35884	4.28171	2.9839			9.05343	16.6488	4.76703
0.0433333	2.6761	4.32891	2.95698			8.93113	16.6381	4.65926
0.04375	2.88271	4.31514	2.8875			8.69292	16.5982	4.70227
0.0441667	3.49094	4.27638	2.8832			8.90433	16.5523	4.67733
0.0445833	2.84405	4.23078	2.88598			8.8347	16.518	4.68381
0.045	2.91205	4.22176	2.88201			8.7305	16.4823	4.60776
0.0454167	2.88044	4.24379	2.86044			8.61157	16.4317	4.50204
0.0458333	3.0865	4.1464	2.91279			8.81052	16.3228	4.55235
0.04625	2.46645	4.12942	2.77357			8.628	16.3781	4.4816
0.0466667	2.16498	4.06651	2.70957			8.45384	16.3825	4.52492
0.0470833	1.9643	4.09843	2.67203			8.34001	16.2407	4.48894
0.0475	2.96629	4.13695	2.68966			8.27612	16.5062	4.46948
0.0479167	2.81892	4.04156	2.69849			8.13762	16.4491	4.42695
0.0483333	3.19862	3.97423	2.70213			8.19954	16.4779	4.24445
0.04875	2.44763	3.94539	2.65331			8.20274	16.373	4.28951
0.0491667	1.92092	3.91964	2.65753			8.4339	16.5525	4.24471
0.0495833	2.69922	3.91031	2.60312			8.14823	16.5629	4.25665
0.05	2.3089	3.92083	2.60873			8.02879	16.3168	4.27337
0.0504167	2.07578	3.93832	2.60382			8.3452	16.512	4.19722
0.0508333	1.90798	3.90729	2.57366			8.2396	16.496	4.23551
0.05125	2.09118	3.90349	2.58103			8.09282	16.318	4.29537
0.0516667	2.28184	3.925	2.53941			7.72932	16.2968	4.13213
0.0520833	2.84886	3.89879	2.5133			7.8684	16.1407	4.16929
0.0525	3.52921	3.86178	2.48062			7.71755	16.1881	4.21847
0.0529167	3.30385	3.83881	2.41529			7.73286	16.295	4.15033
0.0533333	3.28291	3.75466	2.47251			7.99196	16.1363	4.18782
0.05375	3.23523	3.72772	2.44983			7.95826	16.1353	4.11469
0.0541667	3.25664	3.75435	2.4343			8.22896	16.0997	4.0307
0.0545833	3.27121	3.74382	2.44585			8.28117	16.2784	4.0195
0.055	3.26263	3.72002	2.37179			8.0563	16.1862	3.92037
0.0554167	3.26088	3.73603	2.35547			8.06794	16.1469	3.9673
0.0558333	3.2532	3.7347	2.3481			8.19492	16.2376	3.9523
0.05625	3.2305	3.73204	2.3128			8.08457	15.9904	4.01695
0.0566667	3.25307	3.71954	2.32103			8.1707	16.097	3.87794
0.0570833	3.1959	3.69141	2.25523			7.98598	16.076	3.94312
0.0575	3.1975	3.68254	2.26275			8.11936	15.9854	3.88438
0.0579167	3.18749	3.66344	2.2291			7.79165	16.0704	3.73419
0.0583333	3.17832	3.669	2.22554			7.91206	16.2201	3.7277
0.05875	3.13281	3.60778	2.20182			7.88454	15.9759	3.78882
0.0591667	3.10037	3.57488	2.23256			7.94075	15.867	3.81718
0.0595833	3.07845	3.56713	2.19077			8.14781	15.9313	3.8771
0.06	3.08141	3.58677	2.18309			7.96509	16.037	3.81203
0.0604167	3.04342	3.61394	2.14824			7.75499	16.1571	3.72057
0.0608333	3.03188	3.56452	2.18119			7.62161	16.1875	3.80777
0.06125	2.96531	3.55063	2.16764			7.61792	15.9717	3.7491
0.0616667	2.98285	3.51696	2.13996			7.41181	15.9658	3.69081
0.0620833	2.96818	3.52168	2.13593			7.58192	15.761	3.64861
0.0625	2.95607	3.47244	2.08069			7.97137	16.0308	3.67872
0.0629167	2.93708	3.50056	2.06723			7.87112	15.9397	3.60833
0.0633333	2.89196	3.53106	2.04546			7.5984	15.8245	3.28538
0.06375	2.91675	3.47332	2.05519			7.91023	16.0782	3.56027
0.0641667	2.90263	3.43678	2.06421			7.97417	15.6993	3.60355
0.0645833	2.88541	3.44735	2.03663			7.95343	15.8236	3.56438
0.065	2.87625	3.41037	1.98748			7.62761	16.0167	3.55726
0.0654167	2.88946	3.43259	1.96855			7.50818	16.0586	3.5287
0.0658333	2.84293	3.43504	1.98086			7.45066	15.8488	3.56231
0.06625	2.81315	3.43755	1.94585			7.68185	15.8613	3.52866
0.0666667	2.77503	3.39754	1.94372			7.62979	15.8743	3.44526
0.0670833	2.75277	3.44512	1.96369			7.39893	15.9452	3.46388
0.0675	2.75663	3.35039	1.97814			7.70907	15.9384	3.51532
0.0679167	2.73611	3.37575	1.89266			7.74064	16.0919	3.45156
0.0683333	2.72235	3.34775	1.88837			7.55677	15.8177	3.34649
0.06875	2.71786	3.31677	1.90492			7.54596	16.0695	3.32009
0.0691667	2.70685	3.34021	1.89775			7.39545	15.8449	3.34132
0.0695833	2.70219	3.36807	1.88437			7.27527	15.8288	3.35709
0.07	2.67423	3.3566	1.87204			7.31664	15.7396	3.37925
0.0704167	2.66334	3.33461	1.87158			7.48664	15.7751	3.30975
0.0708333	2.60717	3.25136	1.80444			7.57585	15.7344	3.27182
0.07125	2.59246	3.24263	1.8295			7.67118	15.737	3.29819
0.0716667	2.59337	3.24008	1.81082			7.4784	15.667	3.3236
0.0720833	2.57542	3.25246	1.81478			7.68939	15.7755	3.28577
0.0725	2.53739	3.24508	1.80533			7.84867	15.813	3.2376
0.0729167	2.56135	3.26161	1.75435			7.60436	15.9136	3.19304
0.0733333	2.54989	3.25171	1.78069			7.57118	15.9583	3.22359
0.07375	2.53133	3.23778	1.75924			7.39029	15.8728	3.17648
0.0741667	2.50552	3.21372	1.74772			7.2959	15.8018	3.17752
0.0745833	2.49995	3.21626	1.75343			7.26884	15.8062	3.10707
0.075	2.46128	3.18703	1.71719			7.18633	15.5707	3.08568
0.0754167	2.49099	3.22715	1.74136			7.29234	15.6946	3.17769
0.0758333	2.4666	3.18556	1.69951			7.09918	15.5706	3.10185
0.07625	2.47386	3.17422	1.69165			7.19854	15.8393	3.08832
0.0766667	2.43549	3.15934	1.73077			7.2363	15.7708	3.06653
0.0770833	2.46962	3.23962	1.70704			7.46602	15.5147	2.99952
0.0775	2.45446	3.17791	1.67963			7.41329	15.7967	3.08177
0.0779167	2.39506	3.21391	1.64198			7.54979	15.7028	3.06965
0.0783333	2.37786	3.2089	1.63808			7.3357	15.7277	3.01861
0.07875	2.37179	3.15946	1.62572			7.08819	15.6334	2.97898
0.0791667	2.35892	3.14711	1.6087			7.13459	15.7591	3.03635
0.0795833	2.35495	3.1784	1.62994			7.22396	15.764	3.00681
0.08	2.34468	3.14839	1.61082			7.47448	15.649	2.94276
0.0804167	2.30507	3.12152	1.61571			8.10394	15.6211	3.01261
0.0808333	2.32348	3.12188	1.58922			8.32597	15.6864	2.96235
0.08125	2.29893	3.10151	1.58067			8.44594	15.5405	2.89976
0.0816667	2.27386	3.11146	1.5408			8.56969	15.81	2.87386
0.0820833	2.28151	3.07831	1.51846			8.55487	15.6916	2.86087
0.0825	2.27937	3.04868	1.56986			8.63144	15.5953	2.91401
0.0829167	2.26811	3.0482	1.53487			8.59088	15.6113	2.85873
0.0833333	2.21908	3.02744	1.55231			8.66548	15.7054	2.88625
0.08375	2.26111	3.01378	1.52848			8.67448	15.3945	2.84923
0.0841667	2.22317	3.06016	1.55729			8.59701	15.3586	2.79681
0.0845833	2.21953	3.07285	1.50775			8.53977	15.4997	2.79974
0.085	2.21142	3.0001	1.5053			8.47382	15.5908	2.79909
0.0854167	2.19478	3.03322	1.46278			8.58299	15.6667	2.77113
0.0858333	2.19461	3.03076	1.47632			8.55765	15.6948	2.78862
0.08625	2.18494	2.95802	1.45614			8.62468	15.7857	2.83524
0.0866667	2.15797	2.9941	1.44667			8.55336	15.7598	2.77421
0.0870833	2.13721	2.95613	1.44773			8.52472	15.5821	2.70116
0.0875	2.14121	2.95683	1.44346			8.4991	15.5617	2.68957
0.0879167	2.14213	2.95969	1.45348			8.50519	15.6703	2.71293
0.0883333	2.13236	2.93718	1.44915			8.42949	15.4417	2.66364
0.08875	2.13676	2.95867	1.44385			8.44669	15.4419	2.66975
0.0891667	2.10877	2.93378	1.44409			8.50513	15.6195	2.64918
0.0895833	2.09115	2.97386	1.41817			8.44693	15.6953	2.61297
0.09	2.10118	2.90189	1.41748			8.47246	15.6656	2.64511
0.0904167	2.0939	2.93959	1.39747			8.38714	15.679	2.62492
0.0908333	2.05852	2.93443	1.39936			8.39404	15.6748	2.59732
0.09125	2.05682	2.94517	1.39735			8.38044	15.6856	2.57655
0.0916667	2.03836	2.90177	1.39795			8.43063	15.6642	2.56739
0.0920833	2.03725	2.89058	1.3877			8.39174	15.6584	2.57254
0.0925	2.01486	2.89715	1.3666			8.32671	15.5255	2.58296
0.0929167	2.0178	2.92071	1.37957			8.33737	15.5938	2.58217
0.0933333	2.00956	2.90476	1.37334			8.3144	15.6548	2.53386
0.09375	1.9843	2.87818	1.35572			8.31269	15.567	2.5483
0.0941667	1.97716	2.91367	1.37897			8.31639	15.4469	2.54464
0.0945833	1.97819	2.90443	1.33691			8.27087	15.5482	2.5199
0.095	1.99803	2.92088	1.3404			7.68745	15.4426	2.55486
0.0954167	1.9667	2.87616	1.30909			7.13363	15.3226	2.52169
0.0958333	1.93925	2.839	1.32454			6.97555	15.6465	2.49883
0.09625	1.93581	2.86599	1.3036			7.05407	15.5885	2.525
0.0966667	1.94277	2.84325	1.29872			7.1075	15.4517	2.53535
0.0970833	1.9216	2.84577	1.29618			7.50519	15.6369	2.53732
0.0975	1.90761	2.84554	1.27213			7.76001	15.666	2.51984
0.0979167	1.91053	2.87214	1.28549			7.26407	15.4272	2.50575
0.0983333	1.93321	2.8446	1.27661			7.03514	15.4161	2.46704
0.09875	1.92362	2.8549	1.28809			6.98206	15.435	2.46171
0.0991667	1.87882	2.84081	1.26814			6.91489	15.364	2.47023
0.0995833	1.87725	2.80054	1.24725			6.79634	15.4012	2.44619
0.1	1.87812	2.78354	1.24924			6.70557	15.4315	2.48537
0.100417	1.85888	2.76757	1.23087			6.60693	15.5078	2.42565
0.100833	1.84629	2.7812	1.24343			6.56583	15.5175	2.40046
0.10125	1.8448	2.76895	1.24544			6.50486	15.4038	2.4409
0.101667	1.82679	2.76242	1.24042			6.68614	15.6408	2.41349
0.102083	1.84641	2.78087	1.22496			6.78348	15.3989	2.44357
0.1025	1.85126	2.7979	1.23962			6.58285	15.4713	2.41127
0.102917	1.83783	2.80092	1.23229			6.58202	15.3945	2.39307
0.103333	1.81823	2.75267	1.22668			6.70373	15.5528	2.38755
0.10375	1.80739	2.8045	1.21236			6.58181	15.4614	2.39285
0.104167	1.8149	2.76328	1.19954			6.57987	15.4922	2.33352
0.104583	1.7956	2.77902	1.17346			6.41252	15.4429	2.383
0.105	1.79196	2.80053	1.1951			6.62271	15.515	2.35084
0.105417	1.79161	2.77367	1.19752			6.7434	15.3547	2.36445
0.105833	1.78717	2.76076	1.17781			6.77217	15.4669	2.33929
0.10625	1.81353	2.76163	1.16534			6.78733	15.5751	2.32529
0.106667	1.76467	2.76393	1.16513			6.78864	15.5157	2.31548
0.107083	1.75695	2.73528	1.14471			6.69605	15.4289	2.27217
0.1075	1.73628	2.7287	1.15173			6.77174	15.537	2.32036
0.107917	1.73936	2.71859	1.15823			6.68243	15.49	2.3144
0.108333	1.74198	2.71999	1.12698			6.56548	15.5884	2.30051
0.10875	1.73916	2.75159	1.14172			6.45142	15.2402	2.29028
0.109167	1.73326	2.74515	1.1384			6.49566	15.4564	2.25996
0.109583	1.70924	2.72864	1.11821			6.60441	15.4306	2.24588
0.11	1.70992	2.71479	1.10547			7.15584	15.4434	2.24231
0.110417	1.71886	2.70613	1.12783			7.47322	15.6112	2.27212
0.110833	1.70547	2.71844	1.11124			7.64841	15.4509	2.2516
0.11125	1.70484	2.72575	1.10277			7.7436	15.4602	2.26067
0.111667	1.70795	2.74385	1.09588			7.70652	15.5056	2.28668
0.112083	1.68441	2.74306	1.10918			7.76975	15.6259	2.28104
0.1125	1.68094	2.71597	1.09004			7.39593	15.5132	2.27268
0.112917	1.66955	2.719	1.1006			6.93013	15.4333	2.25097
0.113333	1.65994	2.73322	1.09826			6.67438	15.5034	2.21737
0.11375	1.65223	2.74686	1.07387			6.78689	15.3573	2.19361
0.114167	1.64821	2.7308	1.07705			7.43168	15.4855	2.18266
0.114583	1.63937	2.70978	1.05428			7.60861	15.4243	2.21023
0.115	1.64152	2.71291	1.05813			7.70466	15.7383	2.17034
0.115417	1.63796	2.75636	1.05594			7.69376	15.5327	2.16752
0.115833	1.62788	2.75614	1.04395			7.71227	15.4286	2.18863
0.11625	1.64026	2.70054	1.06856			7.7316	15.2374	2.1956
0.116667	1.62273	2.68797	1.04142			7.75138	15.4471	2.16485
0.117083	1.62093	2.66792	1.03128			7.75692	15.3112	2.12194
0.1175	1.61636	2.66866	1.0353			7.73426	15.4159	2.14628
0.117917	1.62191	2.70652	1.02175			7.74655	15.5158	2.1527
0.118333	1.6048	2.7024	1.04178			7.78441	15.4849	2.1636
0.11875	1.60184	2.69545	1.03601			7.73144	15.4523	2.15093
0.119167	1.58657	2.69371	1.01727			7.66462	15.3833	2.1571
0.119583	1.58236	2.7004	1.02281			7.66217	15.0197	2.13976
0.12	1.58693	2.68168	1.0021			7.71378	15.4643	2.10367
0.120417	1.58092	2.65963	1.00668			7.28121	15.2841	2.11146
0.120833	1.58293	2.6769	1.01139			7.02026	15.3858	2.09619
0.12125	1.58822	2.69748	0.99464			6.65521	15.4405	2.1137
0.121667	1.55964	2.69017	0.98356			6.45354	15.4875	2.10046
0.122083	1.54608	2.65918	0.99745			6.64155	15.4414	2.09822
0.1225	1.5608	2.64872	0.99238			7.11224	15.6613	2.11556
0.122917	1.55499	2.63924	0.99238			7.37219	15.3552	2.12566
0.123333	1.56905	2.65523	0.97901			7.46596	15.4669	2.08789
0.12375	1.54417	2.6655	0.97642			7.51057	15.3694	2.07024
0.124167	1.52326	2.67453	0.97479			7.0148	15.3928	2.06676
0.124583	1.52282	2.6544	0.98561			6.68781	15.5187	2.03281
0.125	1.52544	2.61501	0.97163			6.52581	15.4275	2.06164
0.125417	1.5309	2.62958	0.96605			6.44177	15.5098	2.03659
0.125833	1.52221	2.62265	0.94609			6.47283	15.3267	2.05162
0.12625	1.51071	2.60419	0.96367			6.23438	15.4502	2.01274
0.126667	1.50919	2.63128	0.95998			6.12298	15.6139	2.01884
0.127083	1.49146	2.59711	0.95368			6.1113	15.5744	1.99267
0.1275	1.47947	2.59907	0.96082			6.32332	15.6377	1.97382
0.127917	1.48186	2.60899	0.97265			6.1889	15.4791	1.99186
0.128333	1.48019	2.59533	0.95831			6.11507	15.5834	1.94501
0.12875	1.47289	2.58352	0.93537			6.22257	15.295	1.97187
0.129167	1.47335	2.57161	0.95906			6.3168	15.4434	1.99919
0.129583	1.47766	2.57891	0.93454			6.12929	15.3905	1.99364
0.13	1.47338	2.5611	0.93862			6.17778	15.3514	1.98171
0.130417	1.46539	2.56885	0.91963			6.31125	15.2232	1.9688
0.130833	1.47305	2.55771	0.91824			6.18	15.4176	2.01685
0.13125	1.45272	2.58868	0.92351			6.07922	15.3094	1.98045
0.131667	1.44914	2.58442	0.91765			6.31672	15.287	1.95258
0.132083	1.43579	2.60703	0.91498			6.46833	15.4198	1.98908
0.1325	1.42485	2.62488	0.9166			6.47049	15.2769	1.98218
0.132917	1.43667	2.5684	0.91129			6.38497	15.3855	1.92438
0.133333	1.42981	2.57093	0.9049			6.36936	15.5021	1.93483
0.13375	1.42031	2.57617	0.90754			6.14611	15.5173	1.93716
0.134167	1.41343	2.57713	0.89796			6.18876	15.4592	1.93562
0.134583	1.41067	2.55298	0.913			6.22258	15.2217	1.91686
0.135	1.39294	2.58961	0.90516			6.19305	15.3828	1.94953
0.135417	1.40343	2.54257	0.89107			6.2334	15.2727	1.96108
0.135833	1.38765	2.57151	0.88568			6.12239	15.4788	1.95421
0.13625	1.40087	2.57521	0.88511			6.23927	15.5369	1.97242
0.136667	1.40356	2.56023	0.89348			6.18238	15.4239	1.95083
0.137083	1.38893	2.54157	0.88496			6.19106	15.4861	1.93526
0.1375	1.39863	2.58165	0.89262			6.16329	15.2666	1.92519
0.137917	1.394	2.57123	0.89436			6.1876	15.4073	1.9133
0.138333	1.3848	2.55741	0.87758			6.38093	15.3874	1.88392
0.13875	1.3803	2.54718	0.87889			6.38408	15.396	1.88058
0.139167	1.38536	2.52577	0.87113			6.47182	15.4727	1.88467
0.139583	1.37122	2.52375	0.8907			6.25483	15.5335	1.86808
0.14	1.3624	2.51354	0.86581			6.31404	15.4252	1.92931
0.140417	1.37267	2.52007	0.8857			6.32428	15.2981	1.89652
0.140833	1.36794	2.51429	0.88186			6.35735	15.3592	1.88818
0.14125	1.37459	2.52515	0.86107			6.47305	15.4494	1.90309
0.141667	1.36398	2.51696	0.86611			6.43226	15.5595	1.88323
0.142083	1.36362	2.4824	0.86904			6.44996	15.4831	1.87826
0.1425	1.36565	2.50262	0.85548			6.34761	15.5106	1.85271
0.142917	1.3579	2.49686	0.85613			6.34016	15.4729	1.86433
0.143333	1.34535	2.49976	0.83862			6.5016	15.3236	1.86383
0.14375	1.3316	2.49185	0.84157			6.49505	15.2266	1.85703
0.144167	1.31482	2.52163	0.83333			6.46095	15.2313	1.85994
0.144583	1.3232	2.52534	0.82792			6.42253	15.3389	1.85841
0.145	1.31798	2.5141	0.82495			6.40017	15.5677	1.84707
0.145417	1.32925	2.50131	0.8363			6.46295	15.624	1.83794
0.145833	1.31575	2.50212	0.83317			6.44846	15.6103	1.82677
0.14625	1.31407	2.48015	0.83452			6.42753	15.3843	1.82958
0.146667	1.31266	2.51134	0.82708			6.46223	15.3323	1.84163
0.147083	1.30446	2.44451	0.82915			6.483	15.4088	1.86439
0.1475	1.32541	2.48968	0.80836			6.48774	15.6261	1.85908
0.147917	1.31003	2.58112	0.80932			6.49107	15.404	1.82305
0.148333	1.31133	2.52786	0.82006			6.38114	15.1633	1.82456
0.14875	1.29779	2.52225	0.81668			6.39154	15.3014	1.82208
0.149167	1.05861	2.53803	0.81772			6.49939	15.1733	1.8533
0.149583	1.27244	2.45805	0.81468			6.46201	15.3561	1.8416
0.15	1.25811	2.43034	0.80576			6.40869	15.3932	1.81773
0.150417	1.25501	2.45832	0.81003			6.40638	15.2197	1.79467
0.150833	1.26218	2.46495	0.81068			6.41763	15.1782	1.8124
0.15125	1.26137	2.43526	0.80769			6.43974	15.1878	1.79368
0.151667	1.25502	2.41861	0.80785			6.49404	15.3939	1.79634
0.152083	1.24209	2.50624	0.79267			6.51962	15.4215	1.82545
0.1525	1.23943	2.46477	0.79601			6.51477	15.2884	1.81443
0.152917	1.24078	2.42526	0.79036			6.48186	15.2389	1.81531
0.153333	1.24069	2.44581	0.77684			6.51545	15.2647	1.81688
0.15375	1.23516	2.45733	0.7952			6.52619	15.2098	1.81111
0.154167	1.23585	2.46865	0.78663			6.43662	15.2135	1.81868
0.154583	1.23337	2.46835	0.78439			6.48587	15.2659	1.85241
0.155	1.21459	2.43739	0.77969			6.44938	15.2031	1.83095
0.155417	1.2173	2.41103	0.78394			6.45491	15.3547	1.79658
0.155833	1.2202	2.39318	0.76658			6.37002	15.2548	1.80192
0.15625	1.22198	2.39092	0.77693			6.43628	15.1647	1.80582
0.156667	1.21014	2.40353	0.77964			6.43506	15.2989	1.76202
0.157083	1.20514	2.37814	0.76655			6.56625	15.2568	1.78119
0.1575	1.21266	2.36587	0.76233			6.37312	15.3255	1.79432
0.157917	1.21283	2.38379	0.773			6.23187	15.1575	1.81742
0.158333	1.21482	2.41447	0.76093			6.25785	15.2034	1.74381
0.15875	1.20786	2.40775	0.7855			6.194	15.3673	1.76846
0.159167	1.20352	2.3902	0.75836			6.13571	15.2584	1.76529
0.159583	1.19581	2.39577	0.76672			6.11361	15.0519	1.78411
0.16	1.19903	2.40347	0.76215			6.19123	15.1833	1.80866
0.160417	1.18866	2.39555	0.7557			6.23867	15.2811	1.75841
0.160833	1.19596	2.40566	0.75808			6.23808	15.3913	1.7692
0.16125	1.18745	2.40441	0.74533			6.20451	15.1606	1.77858
0.161667	1.20323	2.42834	0.75203			6.18094	15.2929	1.75663
0.162083	1.20206	2.44074	0.74766			5.99148	15.2235	1.74544
0.1625	1.1951	2.45884	0.74556			6.0146	15.1758	1.74256
0.162917	1.19244	2.42212	0.7465			6.26116	15.1783	1.76034
0.163333	1.18415	2.41908	0.74933			6.25338	15.3773	1.77358
0.16375	1.18268	2.43669	0.76009			6.09772	15.3167	1.735
0.164167	1.18386	2.42736	0.74438			6.0514	15.2542	1.73953
0.164583	1.17394	2.4345	0.73531			6.14093	15.3125	1.73034
0.165	1.1731	2.4139	0.74935			6.14998	15.2762	1.72103
0.165417	1.16396	2.42031	0.75748			6.03401	15.2787	1.73287
0.165833	1.16531	2.41265	0.7739			6.17509	15.2505	1.73822
0.16625	1.16756	2.39912	0.73175			6.25524	15.1437	1.7139
0.166667	1.18448	2.42626	0.74889			6.12246	15.2295	1.74911
0.167083	1.16932	2.4001	0.73535			6.14952	15.2962	1.72774
0.1675	1.16097	2.40918	0.74626			6.20836	15.2475	1.70884
0.167917	1.15637	2.39899	0.73176			6.11838	15.4221	1.71053
0.168333	1.15725	2.40467	0.7285			6.20826	15.2548	1.71238
0.16875	1.1547	2.41649	0.7253			6.06127	15.0805	1.68163
0.169167	1.16291	2.396	0.74308			6.10448	15.3625	1.7397
0.169583	1.14676	2.44847	0.72284			6.18419	15.3418	1.72219
0.17	1.1398	2.42406	0.72372			6.26357	15.1752	1.69924
0.170417	1.13721	2.41872	0.73238			6.23147	15.4189	1.67987
0.170833	1.1419	2.39374	0.72277			6.25703	15.4572	1.67506
0.17125	1.13436	2.41233	0.73833			6.20059	15.3083	1.71189
0.171667	1.14768	2.39396	0.72248			6.27315	15.5378	1.69882
0.172083	1.14255	2.42015	0.7161			6.17265	15.3018	1.68733
0.1725	1.1356	2.42191	0.73011			6.11677	15.3222	1.6726
0.172917	1.14661	2.43342	0.72045			6.26661	15.4708	1.67232
0.173333	1.14415	2.43429	0.72941			6.20024	15.2378	1.68016
0.17375	1.14983	2.38979	0.71493			6.2064	15.1994	1.70532
0.174167	1.13049	2.37841	0.71584			6.21604	15.224	1.67319
0.174583	1.12531	2.34519	0.7153			6.13951	15.3691	1.69591
0.175	1.12313	2.38445	0.71763			6.22782	15.3612	1.69071
0.175417	1.13174	2.39436	0.73348			6.25197	15.4423	1.67637
0.175833	1.12784	2.36997	0.70665			6.41117	15.4239	1.66689
0.17625	1.10995	2.43703	0.70585			6.3083	15.3872	1.67816
0.176667	1.1297	2.4325	0.7086			6.28413	15.3631	1.66654
0.177083	1.12788	2.41445	0.71228			6.19567	15.5294	1.72909
0.1775	1.12929	2.37954	0.70683			6.3851	15.1498	1.67294
0.177917	1.12677	2.39485	0.71686			6.18523	15.3108	1.65476
0.178333	1.12661	2.41963	0.6991			6.19506	15.3309	1.66272
0.17875	1.12658	2.38733	0.71148			6.14978	15.4802	1.66985
0.179167	1.11059	2.39969	0.69911			6.27895	15.3131	1.64071
0.179583	1.11111	2.37881	0.71174			6.3389	15.2505	1.6226
0.18	1.11351	2.37879	0.70372			6.26686	15.2338	1.6167
0.180417	1.11251	2.38098	0.69792			6.23559	15.4975	1.63373
0.180833	1.11374	2.35805	0.70249			6.18582	15.3678	1.61972
0.18125	1.11675	2.34111	0.70265			6.21907	15.4217	1.62574
0.181667	1.11159	2.37257	0.69421			6.09522	15.2568	1.63545
0.182083	1.11731	2.38238	0.70117			6.17697	15.3541	1.61825
0.1825	1.11143	2.37392	0.69277			6.04888	15.4153	1.63098
0.182917	1.10425	2.37506	0.69224			6.00431	15.3452	1.61237
0.183333	1.10537	2.405	0.70055			6.08533	15.4659	1.64655
0.18375	1.09118	2.40147	0.693			6.30241	15.4482	1.65695
0.184167	1.08991	2.37854	0.67588			6.36438	15.227	1.64393
0.184583	1.0998	2.38615	0.69103			6.37386	15.3271	1.62253
0.185	1.10086	2.3627	0.69732			6.31461	15.3623	1.60891
0.185417	1.09079	2.3887	0.68045			6.16466	15.3414	1.65565
0.185833	1.0871	2.3902	0.6876			6.36314	15.31	1.62032
0.18625	1.08305	2.3735	0.69091			6.38574	15.2439	1.62382
0.186667	1.07827	2.37174	0.68614			6.34393	15.3616	1.63169
0.187083	1.08155	2.3806	0.68781			6.36244	15.3804	1.60493
0.1875	1.07597	2.36857	0.68667			6.47096	15.3009	1.60679
0.187917	1.08114	2.34509	0.67696			6.35815	15.2652	1.63501
0.188333	1.08664	2.35469	0.68502			6.33161	15.1982	1.6394
0.18875	1.08071	2.33979	0.67072			6.473	15.279	1.61832
0.189167	1.08112	2.33616	0.66879			6.4173	15.2536	1.61579
0.189583	1.08448	2.34524	0.67211			6.30768	15.1079	1.61156
0.19	1.07913	2.36499	0.67517			6.37711	15.3435	1.62726
0.190417	1.0835	2.36514	0.67711			6.25793	15.3307	1.65212
0.190833	1.07266	2.35785	0.67951			6.38309	15.4865	1.59698
0.19125	1.07799	2.33533	0.67649			6.71153	15.3638	1.57873
0.191667	1.07418	2.35519	0.6729			7.05583	15.369	1.60386
0.192083	1.07108	2.3661	0.66089			7.17329	15.3362	1.60615
0.1925	1.06593	2.34201	0.6723			7.28379	15.1078	1.64866
0.192917	1.0647	2.32305	0.66832			7.31967	15.2374	1.60316
0.193333	1.06887	2.37218	0.66904			7.32835	15.2627	1.60142
0.19375	1.06835	2.32936	0.6663			7.33861	15.2304	1.61032
0.194167	1.05598	2.38386	0.66625			7.39484	15.1672	1.59639
0.194583	1.0656	2.37023	0.67214			7.42777	15.2151	1.56705
0.195	1.06336	2.34665	0.65931			7.46737	15.334	1.58847
0.195417	1.05461	2.3543	0.66962			7.48	15.4089	1.57302
0.195833	1.05945	2.39746	0.66115			7.42614	15.5205	1.56661
0.19625	1.04654	2.3615	0.67108			7.42279	15.2029	1.57222
0.196667	1.05736	2.3774	0.66679			7.46029	15.3607	1.5742
0.197083	1.05194	2.37555	0.68102			7.42144	15.3717	1.58126
0.1975	1.05215	2.36249	0.64762			7.39986	15.446	1.57742
0.197917	1.04776	2.36456	0.67203			7.44693	15.3537	1.58683
0.198333	1.04674	2.32832	0.65399			7.45454	15.2743	1.59601
0.19875	1.05036	2.32614	0.65108			7.41518	15.389	1.59817
0.199167	1.04413	2.33285	0.64671			7.4032	15.2835	1.58265
0.199583	1.05264	2.33382	0.65826			7.40338	15.434	1.58796
0.2	1.0417	2.38052	0.66106			7.40327	15.3807	1.60099
0.200417	1.04345	2.3566	0.65548			7.41711	15.2402	1.5809
0.200833	1.05152	2.3443	0.66617			7.4051	15.3985	1.59969
0.20125	1.03817	2.36154	0.65151			7.41641	15.3532	1.57107
0.201667	1.0385	2.3542	0.66482			7.437	15.5239	1.57325
0.202083	1.03773	2.37077	0.66877			7.46459	15.4948	1.61094
0.2025	1.04019	2.36219	0.64983			7.41654	15.6199	1.59268
0.202917	1.03744	2.32489	0.6441			7.41069	15.2176	1.56135
0.203333	1.03299	2.34198	0.65367			7.40406	15.3671	1.56509
0.20375	1.03607	2.34577	0.6476			7.40822	15.4735	1.562
0.204167	1.02596	2.37066	0.65074			7.40662	15.2657	1.55223
0.204583	1.03928	2.36662	0.63755			7.42994	15.3379	1.57713
0.205	1.02828	2.351	0.65612			7.39888	15.4911	1.5756
0.205417	1.04229	2.34439	0.64607			7.39795	15.5304	1.55304
0.205833	1.04335	2.33859	0.64456			7.3836	15.4521	1.5705
0.20625	1.02157	2.32849	0.65013			7.41944	15.1792	1.58468
0.206667	1.01745	2.35795	0.64293			7.40857	15.3769	1.59727
0.207083	1.02232	2.33591	0.63657			7.41016	15.3737	1.55909
0.2075	1.02603	2.38599	0.62879			7.37542	15.391	1.55882
0.207917	1.0269	2.37007	0.63893			7.38631	15.5132	1.58358
0.208333	1.02146	2.34686	0.62012			7.45494	15.4397	1.55414
0.20875	1.02192	0.54528	0.63525			7.44434	15.2986	1.55776
0.209167	1.01882	2.20826	0.64383			7.43152	15.2121	1.56927
0.209583	1.01241	0.27208	0.63407			7.39374	15.0576	1.56387
0.21	1.01667	0.01494	0.62642			7.45214	15.0717	1.56095
0.210417	1.0094	0.03784	0.61689			7.49183	15.1559	1.56855
0.210833	1.01652	0.07704	0.60343			7.52731	15.0017	1.60427
0.21125	0.99967	0.08561	0.61397			7.56286	14.8571	1.626
0.211667	1.00373	0.09426	0.62157			7.52141	14.8172	1.59668
0.212083	1.00158	0.08547	0.62233			7.47469	14.8447	1.56109
0.2125	0.98333	5.04662	0.61835			7.46899	14.7102	1.59087
0.212917	0.96635	2.97187	0.62734			8.288	14.6821	1.60337
0.213333	0.96937	2.71891	0.62395			7.02494	16.3845	1.69137
0.21375	0.97632	2.47081	0.62353			6.74538	14.3342	1.49753
0.214167	1.35482	2.62991	0.78931			6.69247	14.1084	1.38941
0.214583	1.61407	2.47774	0.91529			6.78493	13.8763	1.33541
0.215	2.03196	2.56605	1.16675			6.72814	13.9811	1.27589
0.215417	2.53147	2.83132	1.51246			6.66753	13.8954	1.25718
0.215833	2.85817	3.16056	1.95252			6.59028	13.9596	1.22366
0.21625	3.14329	3.49932	2.39438			6.58959	13.9356	1.22393
0.216667	3.36131	3.86554	2.85043			6.61599	13.9298	1.20487
0.217083	3.5583	4.20563	3.28729			6.56759	13.846	1.19615
0.2175	3.71522	4.55252	3.61155			6.59407	13.6795	1.19799
0.217917	3.88503	4.89682	3.93779			6.6107	13.7898	1.19846
0.218333	4.02557	5.16384	4.24185			6.6414	13.7757	1.19942
0.21875	4.13143	5.45864	4.54155			6.64121	13.7556	1.17645
0.219167	4.26159	5.6848	4.79143			6.63222	13.9636	1.20402
0.219583	4.40926	5.97532	4.65549			6.59487	13.9677	1.17732
0.22	4.53176	6.32042	5.19584			6.63358	14.0252	1.17537
0.220417	4.64049	6.51225	5.45838			6.63821	13.7527	1.19354
0.220833	4.71947	6.72573	5.64356			6.60343	13.9743	1.18638
0.22125	4.79895	6.91654	5.74024			6.59278	13.9279	1.20238
0.221667	4.90091	7.05882	5.84065			6.64153	13.9957	1.21785
0.222083	5.0185	7.35963	6.00281			6.67252	13.9578	1.18649
0.2225	5.02298	7.58721	5.97318			6.67953	13.9497	1.19066
0.222917	5.1418	7.77992	6.21819			6.26363	14.041	1.21434
0.223333	5.26946	7.89381	6.31414			6.0644	14.0239	1.20716
0.22375	5.26784	7.95739	6.41417			6.06639	13.9977	1.19665
0.224167	5.36923	8.22104	6.55853			5.94852	13.9726	1.20723
0.224583	5.428	8.30585	6.75255			5.79953	14.1147	1.20871
0.225	5.93779	8.44127	6.95377			5.81547	14.0194	1.2091
0.225417	5.60514	8.61112	7.04069			5.86975	14.0279	1.19946
0.225833	5.75348	8.72412	7.16415			5.8781	13.9572	1.18998
0.22625	5.76563	8.93469	7.23553			5.69366	13.9479	1.19674
0.226667	5.82826	8.96463	7.1818			5.76702	13.9775	1.21871
0.227083	5.96899	9.1407	7.49526			5.85037	14.0573	1.204
0.2275	6.1134	9.23367	7.73295			5.93043	14.0353	1.20221
0.227917	6.22962	9.37541	7.7084			6.0328	14.2083	1.21227
0.228333	6.17566	9.53101	7.84849			5.96103	14.202	1.20144
0.22875	6.43218	9.57865	7.90704			5.9732	14.075	1.20221
0.229167	6.4108	9.7291	7.91823			5.86068	13.9614	1.21132
0.229583	6.56439	9.76824	8.13701			5.92639	14.2496	1.20447
0.23	6.6921	9.86413	8.40169			5.93808	14.171	1.22309
0.230417	6.77758	9.99856	8.37697			5.94931	14.0138	1.24083
0.230833	6.73071	10.0381	8.61066			5.80696	14.1057	1.23429
0.23125	6.84624	10.2397	8.89092			5.91087	14.1586	1.21602
0.231667	6.9566	10.3208	8.63716			5.79413	14.2031	1.21384
0.232083	7.05854	10.3151	8.88927			5.7674	14.1196	1.21476
0.2325	7.11905	10.4481	9.0694			5.94243	14.0143	1.21697
0.232917	7.23666	10.6293	9.02322			5.97461	14.2703	1.22499
0.233333	7.47449	10.5697	9.1524			5.98895	14.0947	1.23006
0.23375	7.49416	10.6634	9.25714			5.9213	14.0948	1.2268
0.234167	7.52812	10.8835	9.48026			5.93543	14.2549	1.21625
0.234583	7.62126	10.8852	9.76424			5.84659	14.2284	1.22986
0.235	7.68002	10.927	9.81652			5.97662	14.2643	1.24979
0.235417	7.80802	11.1018	9.8631			6.02826	14.3584	1.24347
0.235833	7.97431	10.9827	9.92322			6.165	14.3836	1.24677
0.23625	8.11111	11.1857	10.162			6.18371	14.1359	1.23693
0.236667	8.2437	11.2861	10.1616			6.00352	14.1052	1.25405
0.237083	8.19748	11.43	10.15			5.89803	14.1515	1.249
0.2375	8.40539	11.3692	10.1737			5.95497	14.2923	1.23521
0.237917	8.45117	11.4178	10.3016			6.01764	14.2783	1.24828
0.238333	8.58266	11.6257	10.6815			6.19269	14.3915	1.24508
0.23875	8.57459	11.8066	10.8544			6.17472	14.3889	1.2367
0.239167	8.73027	11.6934	10.8765			6.17023	14.4083	1.23698
0.239583	8.88503	11.8869	11.2603			6.09029	14.4317	1.25278
0.24	9.07482	11.9665	11.1899			5.94556	14.4825	1.24927
0.240417	9.2058	12.0383	11.4475			6.13545	14.2956	1.25381
0.240833	9.1224	12.1246	11.3009			6.04787	14.4469	1.24629
0.24125	9.30142	12.0384	11.6161			6.04437	14.5531	1.25891
0.241667	9.29739	12.1426	11.9955			5.98784	14.3991	1.23742
0.242083	9.51674	12.289	11.6172			5.99371	14.4223	1.23393
0.2425	9.59917	12.2577	11.8583			6.08788	14.4322	1.25891
0.242917	9.62116	12.2577	11.8231			5.99567	14.3902	1.26392
0.243333	9.66749	12.4802	11.9289			6.1132	14.3882	1.2483
0.24375	9.80197	12.3937	12.1256			6.06045	14.3446	1.24299
0.244167	9.78009	12.4764	12.2381			6.10822	14.3997	1.24978
0.244583	10.0058	12.4417	12.2509			6.36364	14.5091	1.25415
0.245	10.0704	12.5774	12.1988			6.23946	14.5915	1.25739
0.245417	10.0878	12.65	12.451			6.13422	14.5804	1.24823
0.245833	10.0863	12.8043	12.8055			6.09509	14.5721	1.26212
0.24625	10.3586	12.734	12.8479			6.31716	14.4169	1.27058
0.246667	10.5766	12.9214	12.6455			6.59683	14.3055	1.25313
0.247083	10.374	12.8069	12.8095			6.69189	14.2921	1.26258
0.2475	10.6793	12.6308	12.9654			6.76304	14.4983	1.26096
0.247917	10.7021	13.0184	13.1132			6.79478	14.4205	1.27556
0.248333	10.8129	13.0914	13.17			6.79929	14.5917	1.28579
0.24875	10.9015	13.1454	13.5467			6.87695	14.2637	1.26221
0.249167	10.8499	13.0829	14.0546			6.85146	14.432	1.2589
0.249583	11.0911	13.0813	13.4379			6.90724	14.3992	1.26222
0.25	11.1632	13.0457	13.3178			6.92521	14.5709	1.25597
0.250417	11.2559	13.2421	13.4281			6.954	14.4931	1.25621
0.250833	11.3984	13.2656	13.7211			6.99745	14.5246	1.22649
0.25125	11.3945	13.2515	13.5484			6.96244	14.6336	1.23263
0.251667	11.1729	13.3771	13.7944			6.94588	14.6849	1.24374
0.252083	11.5754	13.2738	13.4319			6.98452	14.7136	1.26876
0.2525	11.5654	13.4602	14.0144			6.90008	14.4878	1.27902
0.252917	11.5562	13.5087	14.3048			7.01284	14.5992	1.26294
0.253333	11.5416	13.5391	14.3686			6.99701	14.576	1.27177
0.25375	11.7978	13.5316	14.2987			7.01923	14.7436	1.26176
0.254167	11.723	13.3828	14.5811			6.99333	14.5194	1.27044
0.254583	11.8223	13.2965	14.4051			7.04373	14.618	1.25963
0.255	11.9283	13.4559	14.5685			7.05027	14.5738	1.30241
0.255417	11.9971	13.536	14.6726			6.97885	14.513	1.2819
0.255833	12.2155	13.642	14.7231			7.02023	14.4346	1.28028
0.25625	12.2896	13.5608	14.5612			7.03675	14.5079	1.28241
0.256667	12.084	13.7371	14.9054			7.1407	14.6397	1.3041
0.257083	12.3013	13.7205	14.8715			7.06918	14.7186	1.28538
0.2575	12.282	13.6525	14.9486			7.09719	14.5581	1.29777
0.257917	12.3253	13.8978	15.0862			7.09018	14.75	1.2921
0.258333	12.6915	13.942	15.4023			7.09683	14.4821	1.29882
0.25875	12.6926	13.8974	15.3345			7.07216	14.6588	1.28802
0.259167	12.7748	13.8054	15.2617			6.83625	14.7516	1.31756
0.259583	12.6196	13.8235	15.2254			6.57048	14.7669	1.30111
0.26	12.6354	13.9543	15.2415			6.486	14.6348	1.28572
0.260417	12.8837	13.8902	15.4401			6.33511	14.5873	1.29434
0.260833	12.7928	14.0401	15.4933			6.31494	14.7606	1.27898
0.26125	12.805	13.9684	15.8287			6.3784	14.7092	1.31046
0.261667	12.8271	14.0719	15.7137			6.60018	14.4736	1.32683
0.262083	12.8946	13.8542	15.7438			6.82279	14.551	1.30008
0.2625	12.7567	14.0894	16.0942			6.90331	14.5804	1.31302
0.262917	13.0385	14.1817	15.7613			7.012	14.5962	1.31283
0.263333	13.5091	14.0899	16.1409			7.04359	14.5684	1.2963
0.26375	13.3254	14.0339	15.507			7.09986	14.6505	1.29859
0.264167	13.2899	14.1978	15.8091			7.07111	14.6906	1.32774
0.264583	13.1578	14.1857	15.7201			7.14155	14.7535	1.32688
0.265	13.4801	14.1819	15.6318			7.18069	14.7514	1.29795
0.265417	13.5205	14.1382	15.5547			7.15583	14.611	1.31134
0.265833	13.7187	14.191	16.1414			7.13147	14.587	1.28503
0.26625	13.4336	14.3309	16.111			7.07606	14.615	1.28542
0.266667	13.4802	14.3155	16.121			7.09892	14.5723	1.2951
0.267083	13.5963	14.2365	16.076			7.13859	14.6516	1.30204
0.2675	13.4864	14.4242	16.0955			7.11504	14.775	1.30722
0.267917	13.4142	14.3874	16.1153			7.10765	14.6917	1.31133
0.268333	13.6431	14.2866	16.5669			7.12036	14.6006	1.29878
0.26875	13.6454	14.2908	16.955			7.18408	14.7338	1.29173
0.269167	13.7845	14.3076	16.6351			7.20109	14.6247	1.28558
0.269583	13.8447	14.4459	16.3521			7.16652	14.6894	1.30971
0.27	13.9068	14.3754	16.4378			7.13649	14.6857	1.29582
0.270417	13.9071	14.4473	16.1642			7.14191	14.7981	1.30767
0.270833	13.9895	14.487	16.3933			7.14481	14.8249	1.32043
0.27125	13.8876	14.4697	16.5223			7.1371	14.9305	1.33849
0.271667	13.9972	14.5176	16.7216			7.12736	14.8159	1.31011
0.272083	14.0783	14.439	16.6134			7.15673	14.7403	1.34484
0.2725	14.2687	14.5314	16.5624			7.21985	14.7364	1.30363
0.272917	14.2902	14.5535	16.2945			7.20319	14.8009	1.30047
0.273333	14.0706	14.4774	16.6185			7.20103	14.8026	1.29317
0.27375	14.292	14.7024	16.8198			7.22943	14.8244	1.29877
0.274167	14.3806	14.5525	16.7508			7.1878	14.6312	1.32568
0.274583	14.1977	14.5514	16.9172			7.22686	14.7119	1.31792
0.275	13.8999	14.5984	16.9577			7.21642	14.6622	1.28437
0.275417	14.2676	14.798	17.1566			7.21899	14.9174	1.31188
0.275833	14.533	14.5338	17.3679			7.21563	14.7884	1.33037
0.27625	14.4326	14.7606	17.0888			7.21781	14.889	1.30602
0.276667	14.6088	15.0184	17.5305			7.23227	14.9035	1.31155
0.277083	14.4989	14.7885	17.3574			7.29259	14.7551	1.28374
0.2775	14.7859	14.7408	17.1534			7.28967	14.8119	1.28413
0.277917	14.6849	14.8516	17.3859			7.30678	14.8048	1.28021
0.278333	14.8535	15.0017	17.1195			7.29167	14.8395	1.2883
0.27875	14.7523	14.9106	17.1782			7.35146	14.8555	1.28711
0.279167	14.8242	14.8696	17.2067			7.2811	14.7492	1.30585
0.279583	14.8866	14.8782	17.161			7.25854	14.861	1.30795
0.28	14.8569	14.8325	17.3515			7.26625	14.697	1.32812
0.280417	14.7904	15.0341	17.4131			7.25889	14.7105	1.31378
0.280833	14.8761	15.1108	18.008			7.30652	14.7094	1.31956
0.28125	15.1342	15.0885	17.9254			7.31297	14.7216	1.32388
0.281667	15.0223	14.9565	17.7843			7.3091	14.7607	1.31411
0.282083	15.321	15.1746	17.9955			7.35458	14.7592	1.30204
0.2825	14.9445	15.0508	18.2659			7.34556	14.5959	1.32871
0.282917	15.0181	15.184	18.0511			7.3832	14.7588	1.31727
0.283333	15.1777	15.1918	17.9132			7.39504	14.7011	1.33144
0.28375	15.1981	15.4591	18.0102			7.37986	14.7813	1.33499
0.284167	15.066	15.0388	17.8981			7.42185	14.7543	1.32365
0.284583	15.293	15.2356	17.941			7.37096	14.811	1.33027
0.285	15.0792	15.4489	18.2201			7.36881	14.8289	1.30994
0.285417	15.234	15.3182	18.3393			7.35059	15.0048	1.31972
0.285833	15.5067	15.3562	18.4621			7.33827	14.7119	1.32784
0.28625	15.6395	15.4802	18.1618			7.36185	14.8608	1.33892
0.286667	15.3644	15.3076	18.6403			7.33619	14.7509	1.3231
0.287083	15.7107	15.4107	18.7266			7.33967	14.9268	1.32056
0.2875	15.6442	15.4759	18.4044			7.30752	14.8029	1.31811
0.287917	15.8611	15.5185	18.2587			7.33531	14.7835	1.30615
0.288333	15.8788	15.4045	18.6392			7.39899	14.8409	1.33635
0.28875	15.6271	15.2129	18.7249			7.36894	14.9514	1.3056
0.289167	15.6065	15.5803	18.5			7.37013	14.8748	1.31071
0.289583	15.684	15.5794	18.6998			7.4239	14.9935	1.32743
0.29	16.0166	15.5454	18.5412			7.41231	14.9425	1.33428
0.290417	15.9375	15.7521	18.2778			7.41833	14.8181	1.32087
0.290833	15.9993	15.7066	18.5221			7.43182	14.8526	1.33725
0.29125	16.3093	15.8448	19.4645			7.41731	14.9182	1.31002
0.291667	15.8707	15.7736	18.7583			7.40354	14.9206	1.31705
0.292083	16.2005	15.9053	19.1818			7.47223	14.7829	1.34386
0.2925	16.2476	15.8664	19.3582			7.40645	14.7077	1.3325
0.292917	16.2872	15.7497	19.4519			7.38675	14.8034	1.33362
0.293333	16.4977	15.8602	19.0661			7.43616	14.9195	1.35335
0.29375	16.2358	15.7768	18.8914			7.4307	14.9465	1.3387
0.294167	16.2262	15.9547	18.98			7.42349	14.7113	1.34709
0.294583	16.1799	15.9452	19.2973			7.4852	14.8522	1.34302
0.295	16.3682	16.1649	18.8438			7.44315	14.8505	1.33998
0.295417	16.5851	16.254	19.1663			7.44603	14.7972	1.35421
0.295833	16.4222	16.0544	19.257			7.44406	14.9054	1.35364
0.29625	16.5044	16.1407	19.2092			7.01291	14.868	1.34288
0.296667	16.6518	16.2177	19.2538			6.87344	14.8791	1.33295
0.297083	16.8325	16.1659	19.3093			6.9342	14.9346	1.32464
0.2975	16.6986	16.1718	19.7076			6.93304	15.0037	1.30603
0.297917	16.7099	16.2576	19.159			6.94845	14.9428	1.31387
0.298333	16.9574	16.3851	19.2253			6.75127	14.8334	1.32469
0.29875	16.6331	16.3883	19.3501			6.82618	15.0074	1.33358
0.299167	16.4216	16.2625	19.3543			6.78304	14.9232	1.36931
0.299583	16.7517	16.4185	19.2175			6.83745	14.8928	1.35419
0.3	16.9828	16.3419	20.2829			6.84101	14.7597	1.34262
0.300417	17.0884	16.7633	20.3461			6.90863	14.9311	1.34227
0.300833	17.0279	16.4333	20.0206			6.7978	14.8709	1.34017
0.30125	17.0237	16.5737	20.0191			6.7759	14.8592	1.32636
0.301667	17.3632	16.6033	20.0534			6.78218	14.8666	1.3295
0.302083	17.1702	16.7068	20.3497			6.8193	14.842	1.33882
0.3025	17.2801	16.8082	20.1381			6.80269	14.9374	1.32717
0.302917	17.2925	16.8983	20.2046			6.82869	14.8238	1.33353
0.303333	17.2233	16.9913	20.1591			6.78341	14.9503	1.34345
0.30375	17.2525	16.7782	20.1815			6.95478	14.924	1.32152
0.304167	17.4563	16.6735	20.1996			6.86252	14.8601	1.32245
0.304583	17.3436	16.7661	21.1814			6.73593	14.8941	1.31321
0.305	17.7332	16.8707	20.3729			6.71316	14.8321	1.31614
0.305417	17.7797	16.8073	20.176			6.721	14.7631	1.3402
0.305833	17.3368	17.0181	20.2277			6.87293	14.9013	1.32086
0.30625	17.6596	16.8204	20.2334			6.82568	14.7959	1.33258
0.306667	17.6309	17.0531	20.7667			6.87274	14.6799	1.31642
0.307083	17.7085	16.9411	20.6193			6.85285	14.7456	1.33133
0.3075	17.5847	16.9167	20.7946			6.87534	14.8126	1.34472
0.307917	18.0809	17.1507	21.1627			6.81053	14.9012	1.34303
0.308333	17.7723	17.201	21.1937			6.71889	14.7165	1.34477
0.30875	17.9507	17.3503	21.1495			6.77786	14.8928	1.32096
0.309167	18.2439	17.0869	21.3916			6.88545	14.7975	1.33691
0.309583	18.3458	17.2479	20.7756			6.79432	14.7968	1.33577
0.31	18.3031	17.3787	20.937			6.92993	14.7024	1.32803
0.310417	18.1161	17.374	21.3163			6.92464	14.9516	1.35068
0.310833	17.9867	17.3855	21.5717			6.8339	14.8339	1.30568
0.31125	18.2316	17.4031	21.144			6.80247	14.7706	1.30953
0.311667	17.8225	17.4535	21.5077			6.81062	14.8138	1.30857
0.312083	18.2595	17.5681	21.4496			6.85728	14.9807	1.32143
0.3125	18.6312	17.4489	21.5408			6.85062	14.8006	1.30925
0.312917	18.2854	17.6872	22.1182			7.01179	14.8287	1.33241
0.313333	18.439	17.377	21.7504			6.90073	14.7872	1.34738
0.31375	18.5729	17.6949	21.1529			6.93217	15.0298	1.33412
0.314167	18.7178	17.8711	22.0059			6.92136	14.7682	1.31494
0.314583	18.662	17.6611	21.912			6.87704	14.5523	1.32385
0.315	18.8016	17.7448	21.7764			7.05137	14.763	1.32053
0.315417	18.6689	17.7784	21.6273			7.08605	14.9508	1.33622
0.315833	18.5768	17.9765	22.2533			6.95164	14.7888	1.32596
0.31625	18.7015	17.7569	21.86			6.98424	15.0092	1.33684
0.316667	18.7585	17.825	22.2963			6.97886	14.8605	1.33201
0.317083	18.6386	18.0077	22.5106			6.9968	14.8818	1.31439
0.3175	19.0593	18.0222	22.297			7.02233	14.8819	1.32157
0.317917	19.2605	18.1003	22.0261			7.07711	14.8102	1.32899
0.318333	18.79	17.941	22.8405			7.43934	14.7963	1.33509
0.31875	18.6763	17.878	22.3047			7.64772	14.9079	1.34573
0.319167	19.1229	18.049	22.5708			7.73609	14.8285	1.329
0.319583	19.3478	18.1268	22.5241			7.862	14.8158	1.32176
0.32	19.441	18.4337	22.7738			7.87492	14.8055	1.32774
0.320417	19.39	18.2138	23.5734			7.89979	14.7875	1.32152
0.320833	19.3101	18.1283	23.5114			7.92682	14.9817	1.32654
0.32125	19.5413	18.2617	22.8684			7.92813	15.1216	1.32701
0.321667	19.3888	18.0862	23.0651			7.91347	14.9583	1.32081
0.322083	19.5074	18.1332	23.1052			7.9361	14.8385	1.338
0.3225	19.6848	18.186	22.9209			7.47396	14.8304	1.37598
0.322917	19.3849	18.4722	22.6749			7.25833	14.9031	1.34591
0.323333	19.2081	18.3366	23.0056			7.33551	14.8916	1.36581
0.32375	19.478	18.2881	22.8277			7.27847	14.739	1.37709
0.324167	19.8444	18.3373	23.129			7.39307	14.7786	1.36001
0.324583	19.891	18.6533	22.9049			7.37799	14.8471	1.37338
0.325	20.0112	18.5715	22.8864			7.1381	14.9311	1.35644
0.325417	19.9638	18.5108	23.2195			7.13211	14.7111	1.36206
0.325833	20.0494	18.7574	23.8572			7.07518	14.8283	1.36752
0.32625	20.0069	18.6684	23.9361			7.24132	15.1598	1.37716
0.326667	19.8914	18.4859	23.321			7.19005	14.9856	1.38612
0.327083	20.0667	18.7761	23.6182			7.17041	15.0013	1.37078
0.3275	20.1906	18.6827	24.2762			7.22057	14.8779	1.36209
0.327917	20.0087	18.9505	23.8845			7.23077	15.0191	1.37652
0.328333	20.1767	18.8326	23.6339			7.41919	14.8774	1.34973
0.32875	20.4302	18.8721	23.9239			7.26827	14.9425	1.34057
0.329167	20.3594	18.9382	23.8488			7.13309	14.9732	1.32977
0.329583	20.2509	18.9103	24.198			7.13166	14.8562	1.34865
0.33	20.5105	18.8803	24.1554			7.23645	14.9592	1.35321
0.330417	20.478	19.1752	24.125			7.23925	14.9053	1.37484
0.330833	20.5028	19.2181	24.0304			7.32438	14.9171	1.34899
0.33125	20.8296	18.9289	23.7903			7.33042	14.7961	1.33588
0.331667	20.3993	18.8986	24.0471			7.21095	14.7499	1.36945
0.332083	20.304	19.2108	24.2571			7.37756	14.8309	1.36235
0.3325	20.6047	19.0756	24.0155			7.38008	14.8154	1.3615
0.332917	20.5711	19.1741	24.1853			7.29404	14.9545	1.3482
0.333333	20.9097	19.3748	24.1335			7.28308	14.856	1.34102
0.33375	20.7044	20.0219	24.5091			7.22279	14.7564	1.33593
0.334167	20.8125	19.5844	23.9787			7.24335	14.8324	1.34411
0.334583	20.5798	19.1442	24.1052			7.30366	14.8687	1.34491
0.335	20.8401	19.3438	24.7224			7.46093	14.7889	1.34076
0.335417	21.0534	19.5702	24.9497			7.33563	14.7586	1.31309
0.335833	21.0931	19.5415	24.3166			7.4511	14.834	1.32417
0.33625	20.7781	19.5061	24.41			7.31372	14.7185	1.33792
0.336667	21.1457	19.6518	24.8189			7.39239	14.842	1.35567
0.337083	21.406	19.7345	25.197			7.34977	14.8567	1.33585
0.3375	21.107	19.7902	24.6062			7.46543	14.9147	1.32466
0.337917	21.284	19.7968	24.9323			7.33839	14.9059	1.33127
0.338333	21.4807	19.8825	25.2477			7.43462	14.883	1.34506
0.33875	21.3261	19.5779	24.7283			7.60896	14.8582	1.34873
0.339167	21.8012	19.6668	25.0315			7.45539	14.8025	1.36578
0.339583	21.2944	19.6577	25.1569			7.31817	14.7858	1.33357
0.34	21.2235	19.6676	25.5771			7.36849	14.8261	1.34683
0.340417	22.0667	19.741	25.1033			7.40591	14.7541	1.36107
0.340833	22.0468	19.9594	25.2687			7.54931	15.0109	1.34826
0.34125	22.1147	19.9289	25.5315			7.56745	14.8712	1.37555
0.341667	21.428	19.9759	25.9482			7.52639	14.8647	1.34297
0.342083	21.7857	19.9929	25.7116			7.40021	14.8022	1.37004
0.3425	21.6381	20.0513	25.7262			7.43198	14.7777	1.34431
0.342917	22.0067	20.1651	25.3985			7.58524	14.7089	1.35812
0.343333	21.9923	20.2686	25.8223			7.49418	14.5788	1.35964
0.34375	22.4181	20.0707	25.5621			7.6023	14.6816	1.36402
0.344167	22.4358	20.2466	25.9859			7.59695	14.8462	1.35143
0.344583	22.3775	20.4491	25.7419			7.73984	14.8196	1.35162
0.345	22.2141	20.4119	25.3012			7.42019	14.7415	1.35878
0.345417	22.2008	20.399	25.7338			7.40257	14.7188	1.35719
0.345833	22.677	20.6101	26.1911			7.39563	14.6572	1.33974
0.34625	22.7197	20.2209	25.9816			7.42671	14.7478	1.37189
0.346667	22.8707	20.2378	25.9904			7.54944	14.7518	1.34171
0.347083	22.8277	20.5086	26.2757			7.54434	14.8435	1.33888
0.3475	22.8541	20.4292	26.0437			7.63823	14.7835	1.33489
0.347917	22.7206	20.5223	25.9224			7.719	14.8519	1.34213
0.348333	22.8461	20.2308	25.7433			7.60314	14.9751	1.34689
0.34875	22.9525	20.4446	25.7905			7.64545	14.8066	1.34252
0.349167	22.8785	20.5695	25.4366			7.68665	14.8102	1.34429
0.349583	22.9103	20.6087	26.0853			7.60587	14.9293	1.33098
0.35	22.8464	21.0509	26.1604			7.71918	14.8677	1.33665
0.350417	23.5414	20.7702	26.3258			7.68009	14.7631	1.34873
0.350833	23.4061	20.4755	26.1428			7.61653	14.8991	1.33319
0.35125	23.4087	20.8358	26.3502			7.48511	14.7346	1.34184
0.351667	23.713	20.945	26.0604			7.72602	14.7222	1.34781
0.352083	23.8361	20.96	26.7313			7.81917	14.6608	1.35808
0.3525	24.0102	21.0947	25.9985			7.55848	14.8098	1.35763
0.352917	24.0036	21.0983	26.633			7.5993	14.6721	1.33577
0.353333	23.4218	20.976	27.3317			7.68666	14.8178	1.33836
0.35375	23.7046	21.1228	26.3163			7.60247	14.7738	1.35343
0.354167	23.6547	21.2233	25.5995			7.58902	14.795	1.36269
0.354583	23.8748	21.16	26.5453			7.76873	14.9136	1.34371
0.355	24.1866	21.2088	25.7251			7.67716	14.7013	1.37806
0.355417	24.1146	21.1445	26.2388			7.57871	14.8518	1.35418
0.355833	24.1664	21.2142	26.4734			7.62337	14.8314	1.36062
0.35625	24.1062	21.4422	26.7801			7.68996	14.6856	1.36699
0.356667	24.4447	21.6683	26.728			7.88666	14.8382	1.38484
0.357083	24.5234	21.5844	26.385			7.85808	14.8667	1.36119
0.3575	24.4891	21.5779	26.3928			7.60761	14.8238	1.3705
0.357917	24.5435	21.5513	26.5059			7.59536	14.8762	1.36755
0.358333	24.7949	21.6913	26.8905			7.6215	14.84	1.34373
0.35875	25.4194	21.7994	26.8974			7.92734	14.9155	1.34678
0.359167	24.9765	21.4695	26.8754			8.20381	14.9669	1.36933
0.359583	25.1453	21.7148	26.6913			8.36416	14.7512	1.34255
0.36	24.9746	21.687	26.8677			8.41142	14.81	1.34693
0.360417	25.1406	22.1419	26.9242			8.51207	14.8378	1.36416
0.360833	25.3095	22.194	26.4691			8.53897	14.8758	1.34173
0.36125	25.4431	22.0612	26.8444			8.57076	14.8751	1.36118
0.361667	25.9913	22.0456	26.7709			8.60946	14.8915	1.34861
0.362083	25.1498	22.3246	26.6417			8.5773	14.8854	1.33205
0.3625	25.7363	22.2465	26.9067			8.60233	14.7276	1.35246
0.362917	25.7464	22.2103	26.8595			8.6503	14.8134	1.36881
0.363333	25.7499	22.1606	26.6566			8.67315	14.7659	1.35401
0.36375	25.3862	22.3886	26.483			8.59119	14.9256	1.34399
0.364167	25.7557	22.3769	26.6082			8.62414	14.8541	1.3252
0.364583	26.1345	22.3921	27.059			8.62465	14.7928	1.32418
0.365	26.5505	22.5254	26.7786			8.60584	14.7104	1.31693
0.365417	26.1385	22.6889	26.9385			8.63709	14.687	1.33955
0.365833	26.0866	22.5466	27.2027			8.62973	14.8438	1.34598
0.36625	26.7007	22.8586	27.2992			8.68209	14.8093	1.34526
0.366667	26.3511	23.0971	27.2499			8.71441	14.7301	1.32133
0.367083	26.8685	22.921	26.9202			8.70259	14.7489	1.35615
0.3675	26.2294	22.6947	27.1691			8.69954	14.721	1.33259
0.367917	27.6388	23.0396	27.9712			8.62887	14.8574	1.33488
0.368333	26.7022	23.2998	27.6673			8.62038	14.8164	1.3522
0.36875	27.233	23.2689	27.1817			8.67204	14.6935	1.35337
0.369167	27.1842	23.2573	27.1342			8.74049	14.7721	1.36331
0.369583	27.0764	25.2762	27.3315			8.75421	14.6899	1.35245
0.37	27.2077	23.527	27.1687			8.76349	14.8794	1.36114
0.370417	27.6428	23.4125	27.7686			8.75888	14.7394	1.36056
0.370833	27.5027	23.3748	27.7846			8.72587	14.6684	1.32998
0.37125	27.6525	23.3428	27.495			8.76606	14.9092	1.32815
0.371667	27.9784	23.3736	27.0971			8.75802	14.9232	1.33365
0.372083	28.2189	23.5949	27.3941			8.80695	14.8323	1.33455
0.3725	28.0824	23.8927	27.5637			8.75695	14.7452	1.35461
0.372917	28.426	23.7783	27.6254			8.82263	14.8293	1.34379
0.373333	28.233	23.7365	27.994			8.76021	14.5935	1.33954
0.37375	28.5846	23.9369	28.127			8.7325	14.7988	1.33012
0.374167	28.2156	23.863	27.9574			8.73219	14.564	1.34355
0.374583	28.2881	23.9078	28.0012			8.8381	14.7347	1.33439
0.375	29.3498	24.5496	27.3992			8.87802	14.736	1.32563
0.375417	28.6485	24.2754	27.8372			8.86383	14.67	1.33537
0.375833	28.7141	24.4743	27.7853			8.79039	14.7981	1.34786
0.37625	29.109	24.5899	27.837			8.80013	14.8237	1.32495
0.376667	28.7973	24.5261	28.6025			8.83172	14.854	1.32953
0.377083	29.179	24.2984	28.2572			8.42044	14.9677	1.32655
0.3775	29.3502	24.5757	28.0639			8.10523	14.9784	1.36181
0.377917	28.714	24.4636	28.0004			8.03862	14.8642	1.3326
0.378333	29.7208	24.678	28.703			8.01773	14.9496	1.35964
0.37875	29.4674	24.7758	27.83			8.20009	14.7985	1.39627
0.379167	30.1758	24.9694	28.1579			8.10791	14.7396	1.39704
0.379583	29.8741	24.9521	27.6909			8.10256	14.7161	1.3609
0.38	30.282	24.9559	28.0086			7.9314	14.6657	1.37239
0.380417	30.4634	25.1017	28.0111			7.96865	14.7042	1.37904
0.380833	30.7162	25.0527	28.2266			7.94797	14.8015	1.37841
0.38125	30.3452	25.3313	27.4531			8.03594	14.8707	1.37942
0.381667	31.043	25.312	27.6317			8.07762	14.7463	1.38865
0.382083	30.5191	25.5654	27.7367			8.08212	14.7839	1.37923
0.3825	30.5777	25.4146	28.0194			8.16837	14.6613	1.37518
0.382917	30.9966	25.2609	28.5615			8.13155	14.7725	1.37599
0.383333	30.3969	25.4761	28.369			8.16764	14.7077	1.37533
0.38375	30.9222	25.6191	28.5026			8.03611	14.7404	1.39168
0.384167	31.3569	25.9248	28.413			8.04216	14.7634	1.36376
0.384583	31.3302	26.0606	28.6439			8.12068	14.7344	1.37045
0.385	30.979	26.1242	29.3655			8.16988	14.8098	1.37575
0.385417	31.4749	25.93	28.8405			8.20603	14.7909	1.37153
0.385833	31.6305	25.925	28.8479			8.33907	14.8871	1.37811
0.38625	31.6151	26.0651	28.4819			8.19197	14.7568	1.37268
0.386667	32.1852	26.3462	28.7107			8.21952	14.7085	1.36339
0.387083	32.4515	26.5824	29.1422			8.24233	14.7681	1.38786
0.3875	32.9332	26.455	29.1489			8.0809	14.7868	1.37394
0.387917	32.6398	26.669	29.0072			8.33972	14.7946	1.38521
0.388333	32.5728	26.7905	29.0941			8.74056	14.7542	1.39079
0.38875	32.1083	27.0361	29.1422			8.95714	14.6639	1.37782
0.389167	33.0582	26.7762	29.5279			9.00209	14.6694	1.35624
0.389583	33.2337	27.0214	28.6563			9.16138	14.7624	1.36849
0.39	33.128	26.691	29.8635			9.09949	14.7411	1.3649
0.390417	33.3511	27.1419	29.8232			9.09495	14.5493	1.3887
0.390833	33.6391	27.431	29.1659			9.13624	14.7534	1.37201
0.39125	32.7126	27.0986	29.6494			9.1409	14.8259	1.36765
0.391667	33.3771	27.3367	29.209			9.13261	14.8139	1.39226
0.392083	33.5689	27.2156	29.2893			9.18769	14.8611	1.3737
0.3925	34.0231	27.3948	29.1053			9.14776	14.6053	1.36905
0.392917	33.5051	27.4131	29.294			9.19409	14.7238	1.35905
0.393333	33.5661	27.4369	29.4058			9.18122	14.8389	1.3623
0.39375	34.1706	27.713	29.6732			9.15705	14.6325	1.34564
0.394167	34.0296	28.162	30.3176			9.19793	14.7165	1.36826
0.394583	34.7369	28.292	30.5806			9.20436	14.8366	1.36476
0.395	34.8897	27.9166	29.7521			9.25977	14.6228	1.3714
0.395417	33.9461	28.3787	29.9166			9.26308	14.5617	1.3933
0.395833	34.6662	28.1234	30.0048			9.19753	14.7708	1.35476
0.39625	34.5899	28.4446	29.625			9.199	14.5018	1.34984
0.396667	34.8861	28.406	30.299			9.23012	14.7674	1.37819
0.397083	35.087	28.4655	30.3634			9.29999	14.7243	1.35719
0.3975	35.2364	28.5684	30.3311			9.31423	14.7457	1.33933
0.397917	34.7603	28.5366	30.312			9.28365	14.7738	1.34036
0.398333	35.3045	28.9487	29.7277			9.22402	14.7455	1.34114
0.39875	35.7958	29.0349	31.178			9.20707	14.6408	1.33634
0.399167	35.9439	29.0696	29.987			9.25269	14.4446	1.34939
0.399583	35.9499	28.9765	30.5467			9.21304	14.7712	1.35459
0.4	36.0005	29.1932	30.0148			9.27104	14.6343	1.37318
0.400417	35.8432	29.2627	30.1682			9.24703	14.8165	1.39695
0.400833	36.0338	29.4673	31.2447			9.24408	14.6496	1.34736
0.40125	36.2545	29.76	30.5561			9.25752	14.7186	1.3771
0.401667	35.9873	29.5335	30.0882			9.33058	14.7423	1.3926
0.402083	36.4119	29.3172	29.8817			9.32483	14.8562	1.38513
0.4025	36.0575	29.8968	31.0752			9.2865	14.8187	1.41748
0.402917	37.5143	29.8559	30.3952			9.29147	14.8094	1.41679
0.403333	36.5272	29.7267	30.8658			9.36886	14.7025	1.38239
0.40375	37.016	29.9307	30.7215			9.30544	14.761	1.37739
0.404167	36.919	30.0047	30.9019			9.30707	14.7247	1.38292
0.404583	37.5512	30.3478	31.3233			9.32659	14.7461	1.36969
0.405	37.6141	30.3572	30.8753			9.33802	14.8095	1.37219
0.405417	37.4486	30.4188	31.0638			9.38767	14.7698	1.34754
0.405833	37.2569	30.5503	30.7578			9.42371	14.7191	1.35956
0.40625	37.6183	30.8559	31.666			9.39507	14.8448	1.35512
0.406667	37.4331	30.7677	31.5503			9.42365	14.9815	1.35862
0.407083	38.3547	30.5059	31.0876			9.43133	14.7876	1.36902
0.4075	38.3725	30.7407	31.7416			9.43159	14.8105	1.37121
0.407917	38.8458	31.1904	32.3928			9.43055	14.8695	1.36824
0.408333	38.194	30.6818	32.1472			9.40249	14.7377	1.35835
0.40875	38.3933	31.2413	31.768			9.41388	14.8236	1.3402
0.409167	39.0039	31.1234	31.9204			9.47132	14.6658	1.35511
0.409583	39.2794	31.1801	31.1135			9.45551	14.5561	1.35062
0.41	38.684	31.4805	31.6042			9.03066	14.689	1.32218
0.410417	39.1208	31.4826	32.1095			8.94957	14.771	1.33428
0.410833	38.9899	31.6875	31.9226			9.04769	14.8024	1.3418
0.41125	39.2854	31.6786	31.8712			9.28793	14.6574	1.3101
0.411667	39.4746	31.8128	32.8884			9.38317	14.7852	1.32838
0.412083	39.4827	32.3024	32.8212			9.40879	14.8364	1.34852
0.4125	39.4268	33.0533	32.4784			9.43582	14.8203	1.32094
0.412917	39.9225	32.2182	32.4249			9.19554	14.7115	1.31856
0.413333	39.9479	32.07	32.1955			9.14471	14.6959	1.31768
0.41375	39.8223	32.2672	32.4134			9.12459	14.6628	1.33931
0.414167	40.7768	32.3369	32.7725			8.786	14.5322	1.35492
0.414583	40.3645	32.7673	33.1184			8.66412	14.6932	1.32808
0.415	41.1158	32.2488	32.5445			8.67216	14.6736	1.31432
0.415417	40.6337	32.7051	33.0425			8.57072	14.712	1.31936
0.415833	40.614	33.8228	33.4547			8.48365	14.6524	1.31052
0.41625	41.4347	33.6978	33.0365			8.55568	14.6927	1.31048
0.416667	41.2279	33.2915	33.8402			8.66554	14.6961	1.31486
0.417083	41.7613	33.2475	33.1013			8.6729	14.9298	1.33418
0.4175	41.6446	33.3739	33.7953			8.62356	14.7807	1.32627
0.417917	42.1391	33.5934	33.9346			8.56265	14.5776	1.33978
0.418333	41.8796	33.4945	33.5981			8.6261	14.7835	1.31435
0.41875	42.0056	33.6231	34.0391			8.7966	14.788	1.30258
0.419167	42.581	33.5659	34.0387			8.98504	14.7519	1.32884
0.419583	42.5532	33.6231	34.7742			8.8355	14.6923	1.31881
0.42	43.5141	33.5916	34.1473			8.73634	14.5914	1.30949
0.420417	43.3975	33.9182	34.7799			8.58093	14.7265	1.34087
0.420833	43.7595	34.259	34.3087			8.8387	14.7477	1.32122
0.42125	43.5406	34.4355	33.8663			8.85559	14.6379	1.34318
0.421667	44.6493	34.449	34.4416			8.83887	14.6165	1.34695
0.422083	43.9486	35.9607	33.9723			8.82181	14.8933	1.33407
0.4225	43.9074	34.9006	35.541			8.88498	14.8657	1.33784
0.422917	43.6602	34.8318	34.8915			9.04747	14.8385	1.35463
0.423333	44.587	35.1516	34.9215			9.10025	14.7062	1.35099
0.42375	44.7618	34.9611	34.9668			9.10259	14.747	1.33263
0.424167	45.4735	35.12	35.0417			8.84684	14.7908	1.34337
0.424583	45.2892	35.3671	34.6822			9.03254	14.6281	1.35363
0.425	44.6993	35.6403	35.2008			9.13345	14.8515	1.32756
0.425417	45.0112	35.6043	35.9325			8.92988	14.7361	1.31948
0.425833	45.8127	35.2524	36.0307			8.89287	14.814	1.32252
0.42625	45.8842	35.7648	35.1314			8.96486	14.7256	1.31335
0.426667	45.994	35.7851	36.5187			9.03924	14.737	1.32446
0.427083	46.5999	36.8053	36.4135			8.97859	14.6978	1.3212
0.4275	46.5919	36.9824	36.569			9.09405	14.6984	1.32823
0.427917	46.6101	36.2104	36.0486			8.97592	14.7152	1.34181
0.428333	47.649	36.392	36.3605			9.0492	14.7392	1.36266
0.42875	47.2814	36.8149	36.2656			9.08802	14.7258	1.35088
0.429167	47.4958	36.614	36.3103			8.98295	14.6925	1.33412
0.429583	47.6392	36.6566	37.0245			8.91224	14.697	1.33713
0.43	47.966	36.6982	36.6168			9.00539	14.7459	1.34282
0.430417	48.2355	37.3591	36.3393			9.24403	14.7012	1.34519
0.430833	48.9226	37.7129	36.464			9.23058	14.6607	1.33753
0.43125	48.4949	37.5208	36.4038			9.06108	14.7145	1.33975
0.431667	49.2218	37.7197	36.6716			9.18457	14.7391	1.343
0.432083	48.9809	38.0248	37.4785			9.1161	14.7291	1.31677
0.4325	49.4137	38.1022	37.7868			8.95563	14.7017	1.34722
0.432917	49.4705	38.4053	38.6592			9.0447	14.6835	1.33199
0.433333	49.5041	38.5907	37.9384			9.10288	14.6315	1.35213
0.43375	49.3475	38.3574	39.1416			9.22329	14.6005	1.33633
0.434167	50.1404	38.7419	38.627			9.30107	14.7236	1.32363
0.434583	50.4052	38.8703	38.1245			9.27722	14.7339	1.32923
0.435	50.5141	39.0012	38.0567			9.35449	14.8353	1.32107
0.435417	50.8144	39.0807	39.0097			9.45483	14.5954	1.32506
0.435833	50.9071	39.1511	38.639			9.32675	14.7389	1.35666
0.43625	50.6151	39.4495	38.9596			9.30234	14.7083	1.34791
0.436667	51.7496	39.6352	39.2582			9.34571	14.8244	1.35814
0.437083	51.537	39.7634	39.1145			9.13401	14.6595	1.35129
0.4375	51.3853	39.8605	39.9256			9.15075	14.5215	1.32661
0.437917	52.3217	40.171	40.3507			9.15087	14.5592	1.33371
0.438333	52.4239	40.1314	40.1442			9.14572	14.6501	1.34127
0.43875	52.7971	40.1777	39.5906			9.24748	14.6865	1.32485
0.439167	53.1358	40.729	39.4364			9.361	14.717	1.32724
0.439583	53.0578	40.9753	40.2183			9.13087	14.704	1.33698
0.44	52.7305	41.2569	41.4491			9.16071	14.6895	1.33222
0.440417	53.6975	41.2533	40.6242			9.38764	14.6241	1.37197
0.440833	53.5572	41.6475	40.0937			9.3884	14.8159	1.35716
0.44125	53.8656	41.8201	40.9304			9.50415	14.8184	1.34328
0.441667	54.3893	42.2211	41.2706			9.35544	14.7394	1.3414
0.442083	54.9658	42.2544	41.9056			9.39848	14.7027	1.338
0.4425	54.995	42.0398	40.395			9.63079	14.8269	1.32031
0.442917	55.6535	42.6724	40.9591			9.55153	14.6463	1.32871
0.443333	55.9531	42.5524	41.7508			9.5587	14.6431	1.33626
0.44375	55.8611	42.939	42.803			9.64328	14.761	1.35922
0.444167	55.8643	42.5884	42.3409			9.62238	14.8042	1.33315
0.444583	56.4462	43.3468	41.953			9.66711	14.7701	1.33062
0.445	57.0299	43.5433	41.906			9.48863	14.9002	1.33488
0.445417	57.8389	43.786	41.8438			9.55704	14.6867	1.34041
0.445833	57.9183	44.3229	42.9147			9.49242	14.6722	1.33699
0.44625	57.8418	44.2324	43.0559			9.4928	14.7548	1.338
0.446667	55.8941	44.482	43.6376			9.57986	14.8088	1.34877
0.447083	58.667	44.6583	43.6797			9.49978	14.7072	1.34231
0.4475	58.9299	44.8542	44.0545			9.42006	14.6697	1.33912
0.447917	59.7126	44.7205	44.5584			9.4726	14.5835	1.32242
0.448333	59.4872	45.3736	44.8093			9.55086	14.711	1.3082
0.44875	59.858	45.7181	43.995			9.61716	14.8614	1.31251
0.449167	59.9791	45.4548	44.7385			9.44161	14.7057	1.3264
0.449583	60.2156	45.7622	45.1446			9.48404	14.6468	1.34419
0.45	60.8092	45.9244	44.8979			9.73612	14.7445	1.33197
0.450417	60.5959	46.3877	45.9689			9.57964	14.584	1.33542
0.450833	61.0196	46.8686	46.2106			9.73101	14.6921	1.33028
0.45125	62.5488	46.722	46.1481			9.68709	14.6816	1.32607
0.451667	62.3425	47.1101	45.5849			9.61001	14.6491	1.31728
0.452083	62.3225	46.9848	46.2179			9.557	14.699	1.32933
0.4525	62.6768	47.6133	46.7259			9.55422	14.6689	1.31312
0.452917	63.218	47.7141	46.5181			9.53041	14.7323	1.31067
0.453333	62.6605	47.8715	46.7058			9.46248	14.7054	1.30584
0.45375	63.3491	48.5622	46.6067			9.63967	14.6836	1.31217
0.454167	63.9652	48.4933	46.8695			9.80096	14.537	1.32871
0.454583	63.9242	48.7854	46.4647			9.94138	14.618	1.3198
0.455	64.709	49.1204	46.6518			9.86107	14.7161	1.31116
0.455417	65.2008	49.4484	48.0463			9.93266	14.6586	1.3112
0.455833	64.5855	49.2942	47.8831			9.8609	14.5494	1.33356
0.45625	65.619	49.8753	47.2445			9.95107	14.7287	1.29866
0.456667	65.9317	49.8038	48.6637			9.88771	14.6895	1.31949
0.457083	66.3034	50.2067	49.2036			9.86219	14.6303	1.3124
0.4575	65.7948	50.3012	49.6898			9.94624	14.538	1.3266
0.457917	66.8547	50.2286	49.3199			10.1043	14.537	1.32792
0.458333	67.4104	50.5737	49.6438			10.0541	14.7415	1.32139
0.45875	67.3759	51.3679	49.8359			9.96378	14.6936	1.30697
0.459167	68.2728	52.1418	51.04			10.0634	14.8118	1.29759
0.459583	67.8394	51.2602	50.4992			9.90567	14.5255	1.31321
0.46	70.3221	51.955	50.2465			9.81433	14.6701	1.34807
0.460417	69.5538	52.1509	52.0004			9.67796	14.7329	1.31619
0.460833	69.1276	52.4227	51.5134			9.67176	14.6526	1.31866
0.46125	69.7493	52.5881	50.8456			9.97463	14.873	1.32062
0.461667	70.6169	52.7341	50.5429			10.0353	14.769	1.30352
0.462083	70.1606	53.3582	52.5745			9.77142	14.7758	1.31726
0.4625	70.4084	53.5805	52.4542			9.88555	14.786	1.31826
0.462917	70.303	53.7715	52.2566			9.97368	14.6622	1.32935
0.463333	70.9336	53.7357	52.5735			9.76895	14.4833	1.33497
0.46375	71.4637	54.2235	53.4333			9.817	14.6226	1.33753
0.464167	72.1119	54.51	53.385			9.87284	14.7239	1.31719
0.464583	71.8562	54.8228	52.6612			9.96274	14.6094	1.3406
0.465	73.0799	54.9121	52.4273			10.088	14.6179	1.33564
0.465417	72.5524	55.1766	53.2105			10.1293	14.6118	1.30362
0.465833	73.4915	55.8971	53.2703			10.0886	14.671	1.30374
0.46625	72.9819	55.887	55.0351			10.0532	14.8607	1.32368
0.466667	73.6682	55.92	53.8814			10.2088	14.6687	1.33072
0.467083	73.9985	56.3961	56.1559			10.2287	14.5312	1.32033
0.4675	75.155	56.6209	54.8908			10.1377	14.531	1.33449
0.467917	73.6914	56.6884	54.8015			10.2016	14.7618	1.35502
0.468333	75.2547	57.3338	54.7504			10.155	14.7898	1.36041
0.46875	74.7658	57.513	54.479			10.332	14.6804	1.31891
0.469167	74.6826	58.11	54.7185			10.2151	14.7355	1.32118
0.469583	75.4659	57.8226	55.1416			10.1686	14.7243	1.33969
0.47	75.5044	58.1541	55.5678			10.2923	14.653	1.36215
0.470417	76.1437	58.6678	55.989			10.3702	14.6495	1.35289
0.470833	75.8083	58.9873	55.6773			10.1639	14.7599	1.34676
0.47125	75.7285	59.1037	56.8843			10.4053	14.6337	1.35082
0.471667	75.8513	59.0301	56.0412			10.4391	14.972	1.33765
0.472083	75.9372	59.363	55.6991			10.4482	14.6813	1.33893
0.4725	76.3169	60.1258	56.6504			10.2639	14.6801	1.34359
0.472917	75.7554	60.1603	57.6121			10.2955	14.6012	1.32805
0.473333	77.2453	60.6106	57.5737			10.3577	14.6809	1.31989
0.47375	76.9097	60.966	57.8636			10.5156	14.7164	1.30668
0.474167	76.4532	61.2646	58.9577			10.3516	14.7303	1.3437
0.474583	77.1417	61.8271	57.7646			10.2349	14.8875	1.34145
0.475	76.6955	61.5865	58.3263			10.1977	14.8464	1.32911
0.475417	77.1703	62.2634	58.6051			10.2758	14.7136	1.31658
0.475833	77.5511	62.3716	60.5483			10.2492	14.8062	1.31067
0.47625	78.1528	62.866	60.0468			10.1955	14.6623	1.3247
0.476667	77.8406	63.1495	59.4629			10.3487	14.6098	1.3225
0.477083	77.5638	65.3406	59.6172			10.4003	14.7283	1.31374
0.4775	79.2184	64.1301	59.271			10.3845	14.5905	1.34063
0.477917	78.1559	63.9844	59.3939			10.5597	14.6749	1.34086
0.478333	78.4789	64.0953	61.097			10.7033	14.7629	1.34828
0.47875	79.3057	64.5306	61.0179			10.6879	14.5998	1.33134
0.479167	78.9629	65.2037	61.9169			10.4719	14.6957	1.33045
0.479583	79.1201	65.4492	60.6678			10.4696	14.5718	1.31497
0.48	79.5432	65.8054	60.0038			10.5377	14.7201	1.30759
0.480417	80.2005	66.0069	61.3418			10.612	14.7223	1.32006
0.480833	80.5584	65.9728	60.6537			10.5968	14.6284	1.3121
0.48125	80.6677	66.3619	60.9142			10.7684	14.5944	1.32958
0.481667	80.509	66.7747	61.5273			10.6505	14.5696	1.33011
0.482083	81.5344	67.0973	61.3031			11.0138	14.827	1.3245
0.4825	82.5894	67.2295	60.5838			11.2929	14.5604	1.33146
0.482917	82.3615	67.5366	64.2748			11.431	14.6943	1.36831
0.483333	82.9661	67.7706	63.3893			11.4945	14.6355	1.32078
0.48375	82.9456	68.1011	62.8127			11.5522	14.6606	1.32212
0.484167	82.5926	68.4006	62.6628			11.5645	14.6144	1.3243
0.484583	82.8013	68.8999	63.2749			11.5398	14.5544	1.33538
0.485	83.1247	69.2708	64.0859			11.5517	14.7313	1.35071
0.485417	83.8439	69.491	63.8849			11.5286	14.5959	1.32153
0.485833	84.5659	69.2248	65.6742			11.5387	14.7442	1.31658
0.48625	85.153	70.0366	65.0952			11.5915	14.6125	1.32392
0.486667	86.0667	70.0485	64.476			11.5986	14.6817	1.3204
0.487083	86.4528	70.2992	65.5926			11.5723	14.7538	1.31598
0.4875	86.072	70.5045	66.3157			11.6446	14.6845	1.32647
0.487917	86.9163	70.5144	66.3515			11.6693	14.6794	1.33211
0.488333	86.9359	70.5317	66.5576			11.6923	14.5827	1.34387
0.48875	88.4295	70.9487	66.3343			11.2098	14.6134	1.32462
0.489167	88.3454	70.948	66.387			10.9756	14.6059	1.35144
0.489583	88.6965	70.8262	66.9655			11.0356	14.6822	1.36811
0.49	89.5536	70.7449	65.693			10.9395	14.6194	1.35859
0.490417	89.7431	71.2193	65.8203			10.7772	14.747	1.34839
0.490833	89.1605	71.5191	66.6904			10.8665	14.5969	1.33324
0.49125	89.5584	71.1663	66.4251			10.9315	14.6605	1.32983
0.491667	90.6045	71.0308	67.4471			10.9957	14.6772	1.31617
0.492083	91.3282	71.6463	67.2694			10.809	14.6031	1.29638
0.4925	91.3686	71.6641	68.8339			10.9292	14.6117	1.30836
0.492917	91.3413	71.5776	68.5566			10.9712	14.6395	1.3225
0.493333	91.9114	71.8169	67.3777			10.7924	14.7503	1.31508
0.49375	92.7201	71.9721	68.7281			10.6845	14.7026	1.34037
0.494167	92.7193	72.3242	69.8816			10.796	14.6321	1.32099
0.494583	93.6198	72.4957	69.73			10.9381	14.7409	1.30931
0.495	93.3135	72.5945	69.0547			10.9023	14.6278	1.32338
0.495417	94.215	72.7891	69.5909			10.9139	14.6633	1.30108
0.495833	94.4602	73.0082	69.9611			10.8043	14.6923	1.31078
0.49625	95.4851	73.1399	69.9629			10.9278	14.6161	1.30199
0.496667	95.9999	73.4493	70.9478			10.9392	14.6113	1.30273
0.497083	95.0792	73.5563	70.4678			10.9333	14.4596	1.31053
0.4975	95.155	74.0116	71.3167			10.8622	14.5208	1.31586
0.497917	96.2137	73.9846	70.3118			11.0836	14.6069	1.34845
0.498333	96.8451	74.3989	70.3467			11.4373	14.7693	1.33402
0.49875	97.714	74.6112	71.081			11.3196	14.7023	1.32742
0.499167	97.3519	75.3747	71.7394			11.0894	14.7167	1.34107
0.499583	97.1903	75.0573	71.0736			11.056	14.6467	1.32655
0.5	97.2805	75.5889	71.6174			11.0611	14.488	1.34724
0.500417	98.6445	75.9608	73.7808			11.0336	14.5379	1.34314
0.500833	98.6142	76.4609	73.089			10.9264	14.711	1.3321
0.50125	99.9201	76.5003	73.4948			10.9989	14.5831	1.31817
0.501667	99.2028	76.8395	72.3039			11.1772	14.5885	1.32353
0.502083	100.577	77.8468	73.1106			11.0782	14.5624	1.34515
0.5025	100.242	77.5045	72.8726			11.2064	14.6169	1.3444
0.502917	100.106	77.7189	72.9446			11.0276	14.6291	1.3382
0.503333	101.024	78.2085	75.0507			11.2829	14.5902	1.31234
0.50375	101.126	78.375	74.9479			11.2992	14.6418	1.30453
0.504167	100.686	78.6293	72.978			11.2307	14.7057	1.32548
0.504583	101.818	78.87	75.0874			11.4482	14.8207	1.31401
0.505	102.392	78.9121	76.4671			11.2531	14.6189	1.33685
0.505417	102.104	79.6205	75.6347			11.1687	14.6311	1.33968
0.505833	102.705	79.9875	74.6325			11.042	14.7356	1.33223
0.50625	103.019	80.4882	75.5974			11.3438	14.6379	1.34164
0.506667	103.311	81.8835	77.5265			11.3784	14.5663	1.32519
0.507083	104.033	81.0577	76.9533			11.453	14.6124	1.3366
0.5075	103.381	80.8731	77.2649			11.2649	14.5073	1.3558
0.507917	103.072	81.5412	76.722			11.2933	14.7179	1.3445
0.508333	104.124	82.1556	77.9847			11.347	14.654	1.33075
0.50875	103.507	82.5756	77.0465			11.2473	14.5161	1.33271
0.509167	106.237	82.4581	76.5297			11.2369	14.5208	1.32163
0.509583	105.804	83.4513	77.1012			11.5278	14.5545	1.36399
0.51	104.993	83.6051	77.4304			11.3478	14.5389	1.33097
0.510417	105.893	83.5457	77.2785			11.3977	14.6605	1.35864
0.510833	105.928	83.8218	76.9713			11.6167	14.4935	1.34369
0.51125	106.23	84.1142	78.8489			11.6818	14.5219	1.33285
0.511667	106.362	84.4379	78.6591			11.5794	14.6151	1.33025
0.512083	106.276	85.379	80.2759			11.5324	14.605	1.33886
0.5125	107.481	85.1206	80.106			11.6497	14.4563	1.36468
0.512917	106.903	85.7809	80.2028			11.6484	14.4822	1.34788
0.513333	107.421	86.3817	80.9199			11.8285	14.5781	1.35222
0.51375	107.955	86.3382	79.98			11.4696	14.4191	1.33775
0.514167	108.434	86.4793	80.489			11.3366	14.6104	1.35333
0.514583	107.388	86.8782	79.8015			11.4107	14.4135	1.36468
0.515	108.171	87.6866	76.6304			11.3324	14.6078	1.34659
0.515417	108.621	87.691	77.6434			11.5016	14.6749	1.33487
0.515833	108.378	88.3592	79.4259			11.7096	14.6151	1.34246
0.51625	108.658	88.275	81.9614			11.7066	14.5233	1.34743
0.516667	108.517	88.8072	82.3012			11.9029	14.6413	1.34574
0.517083	108.184	88.6546	82.4654			11.7078	14.6488	1.3356
0.5175	107.464	89.1012	82.7791			11.7603	14.6095	1.3391
0.517917	107.865	89.673	82.2661			11.8547	14.6909	1.32792
0.518333	108.437	90.1546	82.7066			11.8933	14.5323	1.32423
0.51875	107.156	90.3183	82.623			11.9821	14.7246	1.35385
0.519167	108.009	90.4204	83.0271			11.7242	14.5482	1.33286
0.519583	106.723	91.1664	81.9917			11.8929	14.5594	1.34386
0.52	107.776	91.4227	81.3065			12.0295	14.7144	1.34347
0.520417	107.314	91.9941	83.3593			11.7763	14.619	1.35213
0.520833	108.566	91.909	83.0548			11.8752	14.5452	1.35253
0.52125	107.881	92.1092	85.8446			12.0193	14.4485	1.34075
0.521667	108.107	92.1436	84.0765			12.1915	14.5834	1.34721
0.522083	108.459	92.8218	82.5166			11.8294	14.5892	1.357
0.5225	108.618	93.0832	82.5609			11.9522	14.7073	1.34812
0.522917	109.797	93.4698	84.5328			11.9195	14.6075	1.33564
0.523333	109.518	93.6649	84.5079			12.0641	14.4236	1.34407
0.52375	109.873	93.9378	83.5152			12.0052	14.69	1.33646
0.524167	110.389	93.8129	84.1166			12.1732	14.6115	1.31786
0.524583	109.93	94.5615	84.558			12.0672	14.5918	1.31635
0.525	110.879	94.648	85.1867			11.906	14.563	1.34009
0.525417	111.785	95.2696	85.3326			11.7837	14.5159	1.33287
0.525833	111.075	95.6671	85.3226			11.9356	14.4916	1.34962
0.52625	111.979	95.6876	85.3614			11.9929	14.4601	1.33215
0.526667	111.828	95.8275	86.0577			12.0299	14.6705	1.33714
0.527083	112.814	96.1413	86.7509			12.2723	14.6189	1.34027
0.5275	112.302	96.0106	87.2072			12.2428	14.5889	1.33214
0.527917	112.906	96.5638	86.8685			12.3551	14.5192	1.31925
0.528333	113.475	96.7929	85.4073			12.2274	14.5877	1.33007
0.52875	112.728	96.5056	87.1678			12.1173	14.5442	1.32934
0.529167	114.044	97.0485	85.3518			12.4068	14.5207	1.3198
0.529583	114.455	97.3543	85.9529			12.3592	14.4107	1.33707
0.53	113.804	97.9635	86.1459			12.4798	14.5839	1.32302
0.530417	114.313	98.3796	86.4613			12.1074	14.567	1.34685
0.530833	114.383	99.4078	87.2077			12.044	14.5791	1.32879
0.53125	115.534	98.635	87.7711			11.9784	14.5142	1.32894
0.531667	115.237	98.4709	87.1207			12.1412	14.5923	1.31989
0.532083	115.561	98.8436	86.6901			12.1721	14.608	1.32921
0.5325	115.779	99.3453	87.3636			12.2572	14.6279	1.34847
0.532917	115.664	99.704	88.7089			12.4631	14.671	1.33457
0.533333	116.06	99.9926	89.6493			12.4094	14.5972	1.32376
0.53375	116.141	100.143	88.7378			12.5298	14.4333	1.32714
0.534167	116.688	100.29	89.5176			12.2453	14.5665	1.34675
0.534583	116.764	100.744	87.415			12.3793	14.5334	1.36196
0.535	117.101	100.808	88.029			12.4842	14.6294	1.35822
0.535417	117.571	101.107	89.7067			12.1971	14.6226	1.36738
0.535833	116.473	101.237	88.6481			12.4554	14.5147	1.35792
0.53625	118.269	101.255	88.2823			12.4706	14.5715	1.37986
0.536667	117.817	102.004	87.9899			12.5842	14.6009	1.35328
0.537083	118.547	102.087	89.8346			12.7908	14.643	1.35367
0.5375	119.466	102.237	91.0385			12.5042	14.6383	1.34016
0.537917	119.023	102.611	91.6703			12.6115	14.6424	1.36297
0.538333	118.306	102.501	90.3767			12.6963	14.6365	1.37724
0.53875	119.863	102.799	90.6002			12.4342	14.7177	1.35935
0.539167	119.941	102.882	89.9254			12.4981	14.6587	1.34849
0.539583	119.23	102.963	89.3714			12.3113	14.7068	1.36303
0.54	119.549	103.471	91.0289			12.4992	14.5842	1.3241
0.540417	120.733	103.534	92.4707			12.39	14.5656	1.35458
0.540833	121.477	104.123	92.4193			12.6922	14.6368	1.33843
0.54125	121.966	104.728	93.0673			12.9483	14.5688	1.3657
0.541667	121.599	104.016	92.3633			13.0057	14.4886	1.35937
0.542083	120.787	103.948	91.537			12.8789	14.5574	1.34762
0.5425	121.595	104.648	93.865			12.9802	14.6734	1.32792
0.542917	123.257	104.795	93.7881			12.7449	14.5364	1.33897
0.543333	122.701	104.939	94.2012			12.8013	14.5491	1.35357
0.54375	122.302	105.132	94.2896			12.8879	14.6675	1.34402
0.544167	123.102	105.413	94.3121			12.9371	14.682	1.38416
0.544583	123.839	105.256	94.2066			12.8117	14.447	1.35346
0.545	123.012	105.599	94.7499			12.8781	14.4814	1.36621
0.545417	124.839	105.466	95.0761			12.8424	14.5548	1.36377
0.545833	124.096	105.474	95.6336			13.1009	14.6347	1.35139
0.54625	124.356	105.799	96.3004			13.1111	14.5075	1.34157
0.546667	123.423	105.764	96.3928			13.1077	14.5182	1.34359
0.547083	124.374	106.269	97.4256			13.0168	14.6942	1.34335
0.5475	125.035	105.661	97.8735			12.9662	14.4909	1.33222
0.547917	125.385	105.613	99.6068			12.951	14.6103	1.33974
0.548333	125.971	105.596	98.1824			13.2286	14.572	1.36006
0.54875	125.654	105.499	98.2154			13.1149	14.6334	1.34617
0.549167	126.67	105.775	99.0898			13.0675	14.6159	1.33416
0.549583	125.231	105.948	99.7835			13.1081	14.5829	1.34368
0.55	126.354	105.766	99.3451			13.2345	14.6591	1.34862
0.550417	127.711	106.046	99.2028			13.1998	14.6526	1.35212
0.550833	126.5	106.177	100.14			13.1109	14.5085	1.34266
0.55125	126.712	106.049	98.933			12.9994	14.8093	1.33917
0.551667	126.552	106.404	96.9153			13.0478	14.6294	1.35202
0.552083	127.365	106.982	99.054			13.1665	14.4784	1.33931
0.5525	128.148	107.274	99.6138			13.4016	14.3878	1.35889
0.552917	128.226	107.382	101.01			13.1038	14.6543	1.35168
0.553333	127.997	107.657	100.322			13.1937	14.6176	1.35686
0.55375	128.606	107.972	100.872			13.1063	14.5914	1.36802
0.554167	127.934	108.637	98.0046			13.2427	14.4903	1.35914
0.554583	129.111	108.548	100.341			12.9805	14.6114	1.35533
0.555	129.446	108.743	102.983			12.9459	14.6996	1.36107
0.555417	129.23	108.734	101.899			12.9452	14.479	1.35238
0.555833	130.171	109.288	105.737			12.9339	14.486	1.37299
0.55625	130.001	109.426	105.509			13.0103	14.4872	1.37466
0.556667	130.617	109.668	105.043			13.4891	14.5028	1.3745
0.557083	131.032	109.998	103.992			13.6805	14.4429	1.36241
0.5575	130.711	110.539	102.985			13.3493	14.5529	1.34823
0.557917	130.127	111.287	103.934			13.2578	14.5478	1.33456
0.558333	131.061	111.38	104.051			13.3977	14.7157	1.35747
0.55875	131.257	111.775	105.426			13.4222	14.7418	1.34801
0.559167	131.567	111.686	103.695			13.4952	14.5319	1.34302
0.559583	131.264	112.117	104.083			13.9373	14.5602	1.34015
0.56	132.629	112.821	106.806			14.1342	14.6955	1.32999
0.560417	131.351	113.216	105.875			14.3149	14.4164	1.34675
0.560833	132.057	113.157	107.818			14.2565	14.43	1.34673
0.56125	131.749	113.499	107.057			14.4073	14.4331	1.37672
0.561667	131.675	114.089	106.831			14.3441	14.4193	1.37201
0.562083	132.05	114.268	107.39			14.4387	14.5016	1.36659
0.5625	132.189	114.464	107.997			14.5039	14.4752	1.34988
0.562917	133.506	114.733	107.516			14.5664	14.4549	1.3524
0.563333	134.005	115.316	109.075			14.6385	14.4983	1.34154
0.56375	133.358	115.495	108.493			14.4171	14.5398	1.3279
0.564167	134.548	115.684	110.601			14.5991	14.739	1.32238
0.564583	133.22	115.885	110.527			14.7558	14.4031	1.34251
0.565	133.193	116.611	110.269			14.7047	14.5206	1.34139
0.565417	133.398	116.525	110.106			14.7314	14.6667	1.34388
0.565833	134.173	116.922	110.283			14.6627	14.5987	1.32616
0.56625	134.253	117.305	110.644			14.7885	14.4761	1.32067
0.566667	134.305	117.65	110.204			14.4622	14.6701	1.3202
0.567083	134.312	117.632	109.319			14.3157	14.7107	1.32816
0.5675	135.51	118.338	110.691			13.959	14.5236	1.35277
0.567917	135.521	118.179	110.013			13.7772	14.4991	1.33823
0.568333	135.648	119.082	111.991			13.9834	14.5183	1.35004
0.56875	135.544	119.583	111.627			13.9134	14.6652	1.37623
0.569167	136.015	119.524	111.786			14.0305	14.3943	1.37897
0.569583	136.002	120.173	111.972			13.8464	14.663	1.38902
0.57	135.281	119.639	112.635			13.9805	14.4752	1.36329
0.570417	135.797	120.396	112.375			13.8136	14.4598	1.37078
0.570833	137.494	120.55	112.839			13.7348	14.5867	1.36165
0.57125	137.21	120.756	113.349			13.8053	14.5748	1.378
0.571667	136.719	121.292	112.778			13.9129	14.5379	1.38827
0.572083	136.195	121.239	113.427			14.0433	14.5111	1.35433
0.5725	137.197	121.536	115.021			14.1266	14.328	1.36102
0.572917	137.168	122.325	114.399			14.1161	14.3328	1.3679
0.573333	136.709	122.374	113.895			14.1149	14.4713	1.37472
0.57375	137.5	122.957	113.971			14.2005	14.4571	1.38737
0.574167	137.687	123.209	114.33			14.3376	14.4563	1.37521
0.574583	138.869	123.21	114.643			14.1337	14.5287	1.35869
0.575	137.226	123.682	115.041			14.1544	14.3084	1.36252
0.575417	137.752	124.167	116.189			14.2865	14.3021	1.37545
0.575833	137.762	124.51	116.789			13.9425	14.3683	1.38157
0.57625	138.548	124.437	115.767			13.911	14.4118	1.37042
0.576667	138.325	124.82	116.731			14.1141	14.3413	1.38182
0.577083	139.899	125.133	117.109			14.6853	14.5615	1.38248
0.5775	138.722	125.42	119.319			15.0533	14.5602	1.35885
0.577917	138.598	125.755	117.868			15.1368	14.3727	1.34416
0.578333	139.702	125.955	118.348			15.1641	14.5452	1.3315
0.57875	139.472	126.195	119.348			15.3555	14.4071	1.32785
0.579167	139.921	126.381	120.567			14.6366	14.4801	1.33028
0.579583	140.51	127.187	120.725			14.4724	14.378	1.3286
0.58	140.524	127.179	120.01			14.3623	14.5689	1.32849
0.580417	140.506	127.339	119.415			14.3999	14.5174	1.32559
0.580833	141.262	128.29	119.738			14.5001	14.5507	1.32333
0.58125	140.371	128.154	118.069			14.5605	14.5098	1.33844
0.581667	140.953	128.564	118.594			14.5356	14.3365	1.34862
0.582083	140.795	128.915	118.859			14.6943	14.3366	1.33053
0.5825	141.352	129.003	118.715			14.6902	14.4237	1.33984
0.582917	141.978	128.769	119.103			14.94	14.5423	1.35275
0.583333	142.633	129.406	116.036			14.7956	14.3855	1.35121
0.58375	141.575	129.643	120.17			14.7988	14.3445	1.33691
0.584167	141.137	130.28	120.411			14.7889	14.5107	1.36158
0.584583	142.695	130.242	122.22			14.9289	14.4609	1.37643
0.585	142.06	130.784	121.594			15.1294	14.6305	1.3439
0.585417	142.674	130.564	121.837			15.0733	14.526	1.34335
0.585833	142.765	130.866	121.75			14.7423	14.5841	1.34783
0.58625	143.178	130.831	121.954			14.7326	14.5185	1.3768
0.586667	143.486	131.163	121.775			14.6346	14.3432	1.3536
0.587083	144.002	131.548	122.825			14.8353	14.4318	1.36295
0.5875	142.719	131.863	123.14			14.7832	14.3475	1.3499
0.587917	143.386	132.42	123.859			15.1147	14.3242	1.36692
0.588333	144.486	132.347	123.311			15.0129	14.3897	1.38168
0.58875	142.528	132.487	123.524			14.8457	14.413	1.35847
0.589167	143.962	132.871	124.037			14.5722	14.6061	1.35788
0.589583	144.221	133.293	124.676			14.8497	14.442	1.35291
0.59	144.686	133.384	125.485			14.7199	14.4439	1.34007
0.590417	144.615	133.952	124.484			14.5155	14.6062	1.34408
0.590833	143.54	134.313	124.003			14.4484	14.5306	1.35013
0.59125	143.867	134.224	125.329			14.5864	14.5443	1.33927
0.591667	145.184	134.58	125.408			14.719	14.6459	1.36167
0.592083	144.481	134.878	125.411			14.7616	14.5198	1.3408
0.5925	145.445	134.842	127.824			15.062	14.4447	1.33827
0.592917	145.555	135.233	127.965			15.1197	14.4205	1.33059
0.593333	145.294	135.494	127.956			14.9028	14.48	1.33782
0.59375	145.992	135.783	128.414			14.9403	14.4689	1.33401
0.594167	145.888	136.172	128.533			15.439	14.4157	1.34268
0.594583	146.307	136.34	129.275			14.9777	14.4087	1.34008
0.595	146.005	136.438	129.655			14.9711	14.5443	1.34446
0.595417	145.736	137.205	126.344			14.9875	14.4579	1.3305
0.595833	145.657	137.93	127.304			14.9225	14.3268	1.33288
0.59625	146.674	137.168	130.826			14.6414	14.5134	1.32497
0.596667	146.739	137.642	129.419			14.7022	14.5403	1.32669
0.597083	147.412	137.812	128.675			15.0416	14.347	1.33144
0.5975	147.485	137.888	131.064			15.1945	14.467	1.33431
0.597917	146.996	138.225	131.553			15.0884	14.3552	1.33282
0.598333	146.974	138.534	130.893			15.5044	14.469	1.34006
0.59875	148.242	138.521	133.812			15.2811	14.3522	1.35226
0.599167	147.856	138.867	132.583			15.1031	14.5185	1.34789
0.599583	148.092	138.87	134.593			15.0946	14.4714	1.37038
0.6	147.428	138.995	134.01			15.2184	14.4015	1.36059
0.600417	147.929	139.611	135			15.257	14.4478	1.34419
0.600833	148.149	139.544	136.259			15.516	14.4434	1.32582
0.60125	149.966	140.635	134.671			15.5517	14.458	1.34726
0.601667	148.391	140.063	134.988			15.4981	14.5554	1.33797
0.602083	148.426	140.485	135.122			15.4413	14.4834	1.31632
0.6025	149.734	140.492	133.518			15.2795	14.5651	1.33072
0.602917	148.544	140.999	134.466			15.7632	14.5192	1.3337
0.603333	148.816	141.337	133.812			15.4628	14.5749	1.33749
0.60375	148.737	141.417	134.538			15.455	14.5166	1.35919
0.604167	148.881	141.327	135.099			15.6849	14.3521	1.34438
0.604583	150.12	142.031	135.045			15.5089	14.5351	1.34968
0.605	149.662	142.029	135.074			15.8781	14.4425	1.3466
0.605417	150.497	142.22	135.831			15.8724	14.4555	1.36055
0.605833	150.242	142.706	135.39			15.6432	14.4982	1.34843
0.60625	150.662	142.652	137.174			15.6935	14.4133	1.37265
0.606667	150.709	142.421	137.04			15.615	14.5132	1.34513
0.607083	150.563	143.053	137.041			15.4993	14.4366	1.34341
0.6075	151.029	143.015	136.499			15.8407	14.3969	1.33606
0.607917	151.526	143.352	136.929			15.9892	14.4295	1.33484
0.608333	150.58	143.481	137.361			15.7091	14.2903	1.35083
0.60875	150.068	143.87	138.103			15.7522	14.4298	1.34047
0.609167	150.983	144.216	137.119			15.6669	14.3838	1.33651
0.609583	152.239	144.241	138.327			15.7874	14.4277	1.36676
0.61	151.928	144.31	138.429			15.3598	14.495	1.32681
0.610417	152.469	144.595	138.647			15.754	14.3813	1.34846
0.610833	152.829	144.557	138.937			15.9341	14.3936	1.34533
0.61125	151.562	145.027	139.45			16.1741	14.5047	1.35814
0.611667	152.958	145.492	137.969			16.2727	14.4786	1.35264
0.612083	153.164	145.362	139.685			16.0117	14.35	1.33846
0.6125	152.704	145.692	141.012			15.6713	14.466	1.35036
0.612917	152.887	145.895	138.367			16.0159	14.5024	1.33024
0.613333	153.452	146.546	139.019			16.1967	14.4567	1.33876
0.61375	153.121	146.685	138.616			16.059	14.4259	1.32094
0.614167	153.405	146.696	138.81			16.1934	14.4017	1.32767
0.614583	153.727	147.128	139.165			16.152	14.4744	1.34042
0.615	154.75	147.338	140.317			15.9203	14.5633	1.36164
0.615417	154.129	147.356	140.094			15.9713	14.3975	1.35593
0.615833	153.674	147.506	137.813			16.2133	14.3448	1.3437
0.61625	154.058	147.507	138.87			16.2698	14.4268	1.34311
0.616667	154.43	148.12	139.708			16.3213	14.4045	1.32985
0.617083	154.568	148.172	140.278			16.5796	14.4417	1.35659
0.6175	154.749	148.297	139.788			16.6734	14.4208	1.34456
0.617917	155.064	148.332	140.76			16.8403	14.5586	1.33161
0.618333	155.065	148.335	140.735			16.5183	14.4646	1.3382
0.61875	154.996	148.628	140.055			16.537	14.4486	1.36188
0.619167	155.327	148.727	142.674			16.5464	14.3948	1.33888
0.619583	155.855	148.879	140.136			16.5954	14.3514	1.34291
0.62	155.35	149.108	139.112			16.4943	14.2767	1.34486
0.620417	154.762	149.476	139.818			16.6306	14.2669	1.31373
0.620833	156.763	149.698	141.143			16.5119	14.4507	1.34401
0.62125	156.584	149.975	141.769			16.6701	14.4369	1.35101
0.621667	156.302	150.241	141.52			16.8348	14.3766	1.34217
0.622083	156.564	150.381	140.885			16.4836	14.3386	1.34203
0.6225	157.434	150.377	141.159			16.4006	14.4637	1.32595
0.622917	156.365	150.626	143.024			16.4571	14.2944	1.33171
0.623333	156.267	151.436	138.343			16.7359	14.4428	1.33769
0.62375	156.864	150.91	133.371			16.8619	14.4811	1.33179
0.624167	157.2	151.276	135.408			16.9296	14.4607	1.34867
0.624583	156.855	151.805	134.12			16.9958	14.5269	1.32576
0.625	157.549	152.201	134.501			17.5383	14.3405	1.32957
0.625417	158.083	152.383	137.228			17.7266	14.4143	1.3257
0.625833	158.557	152.352	139.236			17.7724	14.3998	1.3431
0.62625	158.079	152.535	139.452			17.8915	14.3658	1.34655
0.626667	158.514	152.65	139.848			17.7258	14.3772	1.33487
0.627083	157.836	152.877	140.512			17.0857	14.3723	1.32654
0.6275	158.076	153.194	140.891			17.0199	14.4828	1.34279
0.627917	158.218	153.269	140.775			16.9518	14.421	1.32814
0.628333	159.316	153.266	141.445			16.9935	14.2805	1.31672
0.62875	157.899	153.55	141.522			17.1279	14.1748	1.33839
0.629167	159.298	153.878	140.479			16.8912	14.3652	1.34831
0.629583	158.29	154.3	141.949			16.8141	14.3139	1.34109
0.63	158.96	154.453	142.085			16.8733	14.3146	1.33745
0.630417	159.284	154.607	142.852			17.1556	14.3383	1.34229
0.630833	159.497	154.619	143.495			16.7312	14.4361	1.36087
0.63125	159.788	154.653	141.991			16.9541	14.4632	1.35873
0.631667	159.794	155.003	141.709			17.2303	14.3987	1.33107
0.632083	159.206	155.14	142.206			17.3611	14.3488	1.33333
0.6325	160.662	155.186	142.173			17.4905	14.3837	1.33975
0.632917	160.672	155.522	142.858			17.2325	14.3703	1.34364
0.633333	161.029	155.822	142.483			17.4318	14.4198	1.33538
0.63375	160.522	156.111	141.146			17.3553	14.5457	1.34018
0.634167	160.882	155.978	144.229			17.561	14.3054	1.35132
0.634583	161.059	156.243	145.196			17.6094	14.3563	1.35602
0.635	160.579	156.524	145.261			17.2435	14.4247	1.35262
0.635417	161.327	156.637	145.522			17.1745	14.4943	1.32771
0.635833	161.101	156.824	142.97			17.3326	14.4467	1.33343
0.63625	161.046	157.091	136.922			17.71	14.3675	1.34954
0.636667	160.871	157.429	135.712			17.7423	14.3977	1.33723
0.637083	161.846	157.301	140.525			17.3706	14.3935	1.33339
0.6375	162.068	157.505	142.005			17.7779	14.4165	1.36388
0.637917	162.098	157.702	143.026			17.2215	14.4123	1.35327
0.638333	162.158	157.93	141.465			17.257	14.3968	1.36158
0.63875	161.8	157.946	142.401			17.456	14.4726	1.34879
0.639167	162.8	158.169	143.38			17.8221	14.4733	1.35075
0.639583	161.816	158.508	143.726			17.9164	14.3193	1.34017
0.64	161.801	158.588	145.099			17.5021	14.4052	1.32917
0.640417	162.839	158.936	145.312			18.1011	14.4413	1.33346
0.640833	162.506	159.202	145.374			17.9637	14.2718	1.32263
0.64125	162.818	159.124	146.245			17.7536	14.3135	1.35151
0.641667	162.865	159.1	145.785			17.7402	14.4624	1.32812
0.642083	163.371	159.357	145.172			17.4414	14.533	1.33631
0.6425	162.864	159.765	147.418			17.7274	14.3985	1.37253
0.642917	163.196	159.732	146.184			17.7194	14.4269	1.36662
0.643333	163.83	160.097	146.166			17.782	14.4276	1.35066
0.64375	163.565	160.281	143.55			18.1084	14.4927	1.34851
0.644167	164.42	160.092	144.765			18.1536	14.4338	1.33963
0.644583	164.76	160.413	148.935			18.0935	14.4457	1.32529
0.645	163.771	160.69	150.982			18.381	14.3061	1.35193
0.645417	164.689	161.014	149.551			18.7165	14.3536	1.34455
0.645833	164.873	160.715	146.567			18.3513	14.2415	1.36322
0.64625	164.822	161.08	147.938			18.1978	14.3577	1.35238
0.646667	165.068	161.361	148.609			18.216	14.2872	1.3566
0.647083	164.76	161.332	149.688			18.0124	14.414	1.34683
0.6475	164.451	161.802	149.382			18.3311	14.2746	1.35733
0.647917	164.894	161.622	148.977			18.0226	14.4774	1.36514
0.648333	165.065	161.936	148.624			18.0068	14.3708	1.36968
0.64875	165.142	162.061	149.221			17.8598	14.2501	1.37157
0.649167	164.798	162.371	149.222			17.9662	14.2557	1.35215
0.649583	165.271	162.294	148.354			18.0438	14.2978	1.35476
0.65	166.533	162.634	149.5			18.3755	14.3471	1.36351
0.650417	166.318	162.536	149.756			18.2731	14.462	1.3435
0.650833	166.27	162.825	150.104			18.309	14.2322	1.34089
0.65125	166.171	162.996	149.972			18.42	14.3201	1.36256
0.651667	167.072	163.186	150.791			18.4648	14.2	1.37888
0.652083	166.604	163.238	151.405			18.3089	14.2151	1.35434
0.6525	167.539	163.487	151.47			18.6569	14.2615	1.37176
0.652917	166.319	163.646	151.66			18.4054	14.4794	1.37607
0.653333	166.794	163.865	151.429			18.6655	14.3819	1.36692
0.65375	167.433	164.019	151.523			18.7469	14.304	1.37195
0.654167	167.01	164.151	152.553			18.7737	14.511	1.34141
0.654583	167.987	164.216	151.258			18.7783	14.3524	1.33216
0.655	167.334	164.381	151.65			18.393	14.5087	1.3622
0.655417	167.094	164.657	153.225			18.4193	14.3039	1.367
0.655833	167.772	164.814	152.875			18.8086	14.4259	1.36977
0.65625	167.347	164.959	154.023			19.0248	14.3107	1.37198
0.656667	167.708	164.969	152.159			18.9146	14.341	1.36511
0.657083	168.232	165.173	150.731			18.9961	14.2688	1.34222
0.6575	167.856	165.604	153.335			19.4409	14.2448	1.34471
0.657917	168.113	165.241	152.931			19.1284	14.2682	1.35042
0.658333	168.795	165.53	149.81			19.1795	14.4071	1.35238
0.65875	168.7	165.411	151.189			18.7728	14.3378	1.37205
0.659167	167.803	165.954	153.27			18.8432	14.3104	1.38391
0.659583	168.82	166.007	154.771			19.1801	14.3552	1.34109
0.66	168.853	166.123	154.209			19.0684	14.402	1.34221
0.660417	169.084	166.146	152.756			18.9429	14.3178	1.33995
0.660833	168.466	166.429	153.945			19.0514	14.3774	1.35766
0.66125	168.989	166.642	155.151			18.8465	14.2621	1.35419
0.661667	168.72	166.407	155.603			18.9114	14.3227	1.34565
0.662083	169.012	166.744	154.586			18.7879	14.2958	1.36293
0.6625	170.102	167.084	155.581			18.8396	14.5205	1.34762
0.662917	170.321	167.036	155.513			18.7197	14.4844	1.34513
0.663333	169.949	167.258	155.83			18.8301	14.4408	1.34681
0.66375	169.78	167.267	156.061			19.1412	14.332	1.34933
0.664167	169.389	167.318	156.607			19.3972	14.3348	1.37432
0.664583	170.57	167.592	155.06			19.8782	14.3438	1.35985
0.665	169.945	167.729	153.792			19.3855	14.3043	1.34288
0.665417	169.744	167.933	155.666			19.6871	14.3085	1.35588
0.665833	170.797	168.088	157.973			19.7206	14.316	1.37664
0.66625	170.587	167.997	156.214			19.2042	14.3167	1.36106
0.666667	171.238	168.302	156.098			19.3554	14.305	1.38714
0.667083	170.282	168.701	158.187			19.3707	14.2562	1.39598
0.6675	171.033	168.689	157.867			19.3555	14.2672	1.37609
0.667917	171.052	168.828	157.403			19.5485	14.2149	1.38057
0.668333	171.63	169.052	157.794			19.6446	14.3193	1.35726
0.66875	171.043	168.886	158.303			19.639	14.3261	1.37869
0.669167	171.195	169.124	158.856			19.7918	14.3775	1.38232
0.669583	172.033	169.185	154.997			19.6974	14.2956	1.39289
0.67	171.39	169.296	157.595			19.866	14.4009	1.41756
0.670417	172.748	169.618	156.482			19.8536	14.3196	1.39894
0.670833	172.122	169.609	158.92			19.9704	14.3947	1.37148
0.67125	171.222	169.809	159.935			20.0907	14.2865	1.37033
0.671667	171.758	169.738	159.509			20.1393	14.3041	1.39383
0.672083	171.992	169.99	159.546			19.6545	14.3252	1.38918
0.6725	171.882	170.11	160.106			20.0766	14.3181	1.35307
0.672917	172.271	170.485	157.623			20.199	14.3118	1.37266
0.673333	172.171	170.529	156.244			19.9972	14.2783	1.36032
0.67375	172.534	170.489	158.127			19.4652	14.1394	1.34677
0.674167	172.035	170.738	159.918			19.8215	14.4748	1.3448
0.674583	172.417	171.1	158.502			20.2352	14.4137	1.34932
0.675	172.765	171.057	157.945			19.7719	14.1449	1.35379
0.675417	172.705	171.09	156.925			19.9506	14.173	1.3649
0.675833	172.683	170.859	157.913			20.3404	14.2511	1.36343
0.67625	173.041	171.333	157.398			20.2209	14.2227	1.37109
0.676667	172.886	171.554	157.553			19.9895	14.2423	1.3431
0.677083	173.28	171.527	161.273			20.3644	14.2773	1.33893
0.6775	173.882	171.626	160.229			20.3045	14.1328	1.37615
0.677917	173.64	171.717	156.386			19.9783	14.256	1.3846
0.678333	173.381	172.132	154.907			20.0608	14.2595	1.39066
0.67875	173.617	172.19	156.197			20.3819	14.2923	1.38052
0.679167	174.49	172.179	155.992			20.217	14.3246	1.36782
0.679583	173.71	172.347	156.426			20.173	14.2992	1.37055
0.68	173.604	172.44	156.457			20.2536	14.1324	1.38978
0.680417	173.704	172.778	157.956			20.2347	14.183	1.39162
0.680833	173.999	172.617	161.317			20.2089	14.2806	1.37404
0.68125	174.214	172.619	161.687			20.4558	14.2819	1.35535
0.681667	174.34	172.884	161.211			20.3901	14.1379	1.37479
0.682083	174.506	172.818	161.119			20.2853	14.2052	1.36387
0.6825	173.875	172.988	161.412			20.454	14.3233	1.37538
0.682917	174.955	173.312	159.795			21.094	14.1967	1.38837
0.683333	174.789	173.541	161.325			20.8591	14.1543	1.3603
0.68375	174.571	173.489	160.861			20.8781	14.348	1.38212
0.684167	174.271	173.53	161.233			20.8576	14.229	1.39737
0.684583	175.656	173.947	160.687			20.8182	14.1834	1.39257
0.685	175.491	174.035	161.355			21.1649	14.2205	1.36098
0.685417	175.188	173.794	161.457			20.6585	14.2601	1.37149
0.685833	174.816	174.329	162.051			20.6824	14.1391	1.38816
0.68625	175.316	174.574	162.06			20.9311	14.3355	1.37589
0.686667	175.577	174.408	162.357			21.1568	14.2471	1.37886
0.687083	174.445	174.349	162.461			21.3136	14.3852	1.39141
0.6875	175.338	174.66	161.339			20.8453	14.2302	1.38596
0.687917	175.51	174.583	159.94			21.0642	14.2143	1.38547
0.688333	175.66	174.693	161.226			21.271	14.1685	1.37932
0.68875	175.255	174.811	161.202			21.3542	14.2337	1.39166
0.689167	175.906	174.75	161.49			21.1175	14.2088	1.40031
0.689583	175.907	175.049	162.392			21.1852	14.2452	1.39956
0.69	175.765	174.906	163.249			21.3945	14.2656	1.37729
0.690417	175.88	175.394	162.811			21.6004	14.2409	1.38608
0.690833	176.094	175.137	163.198			21.7096	14.2293	1.36983
0.69125	176.421	175.54	163.563			21.67	14.208	1.38826
0.691667	175.634	175.488	162.011			21.821	14.2771	1.39163
0.692083	176.323	175.3	161.913			21.7738	14.2335	1.38212
0.6925	176.107	175.743	162.108			21.4952	14.2381	1.3703
0.692917	176.393	175.701	161.597			21.5713	14.2583	1.3828
0.693333	175.738	175.884	162.432			22.0285	14.2649	1.39036
0.69375	176.131	176.043	163.221			21.4288	14.1212	1.38134
0.694167	176.339	176.236	163.527			21.4231	14.2097	1.37241
0.694583	176.641	176.103	162.986			21.4616	14.1976	1.41112
0.695	176.166	176.338	162.994			21.4218	14.2971	1.3903
0.695417	177.212	176.311	163.216			21.6442	14.3002	1.37882
0.695833	176.991	176.299	163.669			21.967	14.3001	1.39029
0.69625	177.044	176.481	164.147			21.9628	14.3081	1.39502
0.696667	177.067	176.707	163.883			21.8745	14.3063	1.39435
0.697083	176.815	177.029	163.229			21.9165	14.2764	1.37468
0.6975	177.469	176.826	163.838			22.0043	14.1478	1.37151
0.697917	176.886	176.803	164.243			21.9681	14.1133	1.39263
0.698333	176.8	177.085	164.162			21.9329	14.2872	1.35947
0.69875	177.462	177.239	164.385			22.1393	14.2329	1.35182
0.699167	176.86	177.152	164.086			22.0646	14.4203	1.38622
0.699583	177.003	177.137	165.26			22.2138	14.3863	1.38478
0.7	176.818	177.258	163.928			22.0824	14.2373	1.3515
0.700417	177.071	177.648	164.262			22.3655	14.2302	1.35013
0.700833	177.302	177.557	164.758			22.3185	14.2156	1.34671
0.70125	177.748	177.415	165.097			22.6525	14.108	1.38532
0.701667	177.449	177.79	164.882			22.7175	14.1752	1.41275
0.702083	177.098	177.799	165.024			22.6235	14.0876	1.39038
0.7025	177.606	177.855	164.489			22.3787	14.2797	1.39979
0.702917	177.733	177.703	164.221			22.4439	14.3097	1.3835
0.703333	177.829	178.173	164.503			22.4442	14.201	1.35587
0.70375	177.755	178.282	164.657			22.7798	14.2326	1.38801
0.704167	177.928	178.309	164.216			22.7958	14.2722	1.38842
0.704583	178.059	178.082	164.174			22.3191	14.1658	1.38664
0.705	177.977	178.445	165.105			22.3102	14.2235	1.37226
0.705417	177.793	178.527	164.582			22.473	14.2796	1.37589
0.705833	176.968	178.948	165.043			22.7864	14.2579	1.3942
0.70625	178.058	178.625	164.572			22.515	14.2637	1.40885
0.706667	178.353	178.936	164.122			22.8622	14.185	1.38736
0.707083	178.873	178.916	164.814			22.4929	14.4033	1.40506
0.7075	178.841	178.821	165			22.3538	14.252	1.37488
0.707917	178.226	178.887	164.847			22.5289	14.2898	1.36354
0.708333	178.717	179.161	164.884			23.1278	14.1796	1.37383
0.70875	178.69	179.153	164.609			22.7673	14.2084	1.39527
0.709167	177.958	179.345	164.415			23.2993	14.1901	1.38406
0.709583	178.577	179.428	164.829			22.8901	14.1321	1.38886
0.71	178.742	179.435	164.697			22.8485	14.2735	1.39791
0.710417	179.047	179.497	165.048			23.4695	14.0776	1.37963
0.710833	177.882	179.629	165.244			24.065	14.1622	1.39333
0.71125	178.609	179.538	164.939			24.3621	14.2769	1.38525
0.711667	178.392	179.685	165.272			24.4768	14.1887	1.38181
0.712083	178.878	179.938	165.117			23.9453	14.2944	1.39369
0.7125	178.722	179.755	165.442			23.8751	14.2823	1.4018
0.712917	178.144	179.997	165.261			23.8521	14.271	1.39789
0.713333	178.629	180.115	165.304			23.7612	14.301	1.38689
0.71375	178.299	180.091	165.545			23.2563	14.2919	1.42057
0.714167	178.17	180.2	165.438			23.0529	14.2086	1.41918
0.714583	178.354	180.295	164.98			23.0527	14.276	1.40164
0.715	179.183	180.287	165.175			23.0857	14.2198	1.39859
0.715417	178.24	180.43	165.575			23.0951	14.1951	1.41079
0.715833	179.219	180.523	165.549			23.0273	14.2673	1.39742
0.71625	178.969	180.637	165.632			23.5268	14.3059	1.38395
0.716667	178.803	180.714	165.998			23.1099	14.321	1.38356
0.717083	179.212	180.926	165.571			23.4356	14.2254	1.3971
0.7175	179.36	180.806	165.804			23.4535	14.2218	1.38061
0.717917	179.899	180.708	165.653			23.5167	14.123	1.36483
0.718333	179.774	180.912	165.963			23.6678	14.2417	1.38524
0.71875	179.091	180.897	165.855			23.9945	14.2914	1.39667
0.719167	178.798	181.265	165.82			24.4556	14.1927	1.38034
0.719583	178.751	181.152	165.788			24.0122	14.2899	1.38346
0.72	179.44	180.942	165.812			24.3731	14.3153	1.39187
0.720417	179.559	180.984	165.836			23.5986	14.1837	1.39226
0.720833	179.429	181.293	165.557			24.0346	14.1168	1.41207
0.72125	178.939	181.107	165.841			24.3394	14.1204	1.41726
0.721667	179.443	180.967	165.607			25.0857	14.2848	1.44224
0.722083	179.544	181.028	165.873			25.4419	14.1854	1.42219
0.7225	179.563	181.092	165.783			25.3585	14.4401	1.40664
0.722917	180.176	181.125	165.858			25.4652	14.1718	1.40244
0.723333	179.645	181.304	165.799			25.5445	14.1923	1.40288
0.72375	180.081	181.213	166.018			25.721	14.1325	1.38249
0.724167	179.486	181.268	166.052			25.7988	14.2024	1.37239
0.724583	179.189	181.18	165.721			25.1448	14.1016	1.39055
0.725	180.037	181.252	165.556			25.0267	14.2299	1.40413
0.725417	179.606	181.339	166.098			24.906	14.2222	1.37814
0.725833	180.395	181.477	166.013			24.8382	14.1789	1.40349
0.72625	178.823	181.552	166.371			24.4282	14.1935	1.38405
0.726667	179.383	181.522	166.453			24.7612	14.2062	1.3782
0.727083	180.392	181.701	166.562			25.2595	14.0502	1.40277
0.7275	180.026	181.796	166.774			25.0983	14.1529	1.39661
0.727917	180.49	181.896	166.745			25.2942	14.2827	1.39849
0.728333	180.001	181.765	166.388			25.1058	14.273	1.38997
0.72875	180.534	181.827	166.746			25.1454	14.1336	1.4152
0.729167	180.074	181.947	166.522			25.0699	14.2473	1.42718
0.729583	180.337	181.914	166.469			24.8701	14.2658	1.41153
0.73	179.555	182.082	166.38			25.0824	14.1972	1.40687
0.730417	179.852	182.113	166.578			24.8618	14.1137	1.39512
0.730833	180.762	182.187	166.869			24.6496	14.2166	1.40971
0.73125	179.58	182.423	166.918			24.9795	14.1811	1.42034
0.731667	179.975	182.339	166.912			25.2412	14.0785	1.43509
0.732083	180.715	182.21	166.575			24.8164	14.1343	1.41209
0.7325	179.881	182.469	166.688			25.0119	14.1115	1.42967
0.732917	180.21	182.653	166.554			24.653	14.205	1.40681
0.733333	180.642	182.489	166.817			24.742	14.1378	1.39525
0.73375	180.01	182.711	166.473			25.3659	14.2148	1.39223
0.734167	179.584	182.745	166.45			25.1595	14.3836	1.39903
0.734583	179.909	182.836	166.673			25.6066	14.166	1.36869
0.735	180.495	183.16	166.62			25.028	14.1304	1.39525
0.735417	180.889	182.887	166.613			25.5645	14.2258	1.39469
0.735833	180.5	183.039	166.879			25.3245	14.2415	1.39114
0.73625	180.256	182.845	166.68			25.5752	14.1792	1.39858
0.736667	180.521	182.891	166.608			25.8846	14.214	1.38663
0.737083	179.833	182.751	166.66			25.4097	14.1961	1.40004
0.7375	180.732	182.822	166.924			25.5384	14.1115	1.41464
0.737917	180.195	183.047	166.769			25.6014	14.1558	1.43824
0.738333	180.103	183.149	167.216			25.7794	14.2548	1.44286
0.73875	179.969	183.062	167.313			25.9164	14.3155	1.45352
0.739167	179.262	183.246	167.143			26.0454	14.3134	1.39962
0.739583	179.981	183.307	167.116			25.672	14.2976	1.40636
0.74	180.232	183.071	166.777			25.2714	14.2815	1.43988
0.740417	179.925	183.336	166.517			25.3733	14.2085	1.42178
0.740833	180.022	183.331	166.819			25.4418	14.1606	1.42614
0.74125	180.034	183.622	167.205			25.6402	14.2356	1.43189
0.741667	180.108	183.323	166.971			26.7192	14.2318	1.42474
0.742083	179.991	183.452	167.119			26.3576	14.2055	1.4412
0.7425	180.438	183.506	166.123			26.5244	14.2344	1.41775
0.742917	179.168	183.741	166.267			26.3216	14.2718	1.42428
0.743333	179.926	183.613	166.308			27.0372	14.163	1.40063
0.74375	180.037	183.863	166.65			27.4702	14.0755	1.39802
0.744167	180.065	183.893	166.495			27.5276	14.1561	1.394
0.744583	179.715	183.714	166.627			27.8147	14.0816	1.4121
0.745	180.702	183.91	166.873			27.9664	14.0976	1.40105
0.745417	180.358	183.931	166.676			28.1285	14	1.38016
0.745833	179.762	183.904	166.615			28.2065	14.1405	1.37203
0.74625	181.069	184.07	166.58			28.2736	14.1229	1.39274
0.746667	179.669	184.037	166.441			28.0284	14.0781	1.38716
0.747083	180.153	184.287	166.453			27.9946	14.2605	1.39183
0.7475	180.28	184.072	167.051			27.9222	14.2073	1.3945
0.747917	179.879	184.207	166.419			27.9946	14.3034	1.41495
0.748333	180.11	184.17	166.302			28.1946	14.089	1.42689
0.74875	180.38	184.202	166.396			28.2722	14.0761	1.39652
0.749167	179.965	184.427	166.402			28.239	14.0332	1.38437
0.749583	179.968	184.436	166.611			28.2887	14.117	1.39811
0.75	180.287	184.303	166.691			28.2261	13.9507	1.40862
0.750417	179.981	184.338	166.854			28.1745	14.1497	1.40414
0.750833	180.631	184.586	166.731			28.4825	14.0295	1.39163
0.75125	180.082	184.377	166.518			28.4175	14.0869	1.38091
0.751667	180.676	184.3	166.507			28.3666	14.011	1.38319
0.752083	180.696	184.444	166.241			28.5669	14.1258	1.39609
0.7525	179.703	184.458	166.635			28.5607	14.2028	1.42888
0.752917	180.632	184.65	166.862			28.7169	14.0692	1.431
0.753333	179.802	184.571	166.713			28.6018	14.0969	1.40766
0.75375	179.825	184.229	166.754			28.6319	14.1532	1.39026
0.754167	180.222	184.365	166.649			28.7414	14.1807	1.39112
0.754583	180.041	184.269	166.801			28.8032	14.1146	1.38461
0.755	179.492	184.538	166.943			28.228	14.1693	1.38714
0.755417	180.226	184.465	166.933			27.5355	14.0746	1.36363
0.755833	180.247	184.668	166.897			27.3759	13.9822	1.383
0.75625	179.849	184.52	166.881			27.4411	14.1844	1.38765
0.756667	179.689	184.777	166.854			27.4526	14.2939	1.39772
0.757083	180.195	184.575	166.762			27.3521	14.29	1.44273
0.7575	180.357	184.69	166.961			27.8966	14.1641	1.42513
0.757917	179.781	184.789	166.793			28.2991	14.0751	1.43174
0.758333	179.797	184.755	166.774			28.039	14.1365	1.4051
0.75875	180.376	184.726	166.7			28.5032	14.1205	1.4071
0.759167	179.987	184.704	166.677			28.0207	14.1609	1.39067
0.759583	179.065	184.77	166.888			27.921	14.0715	1.40243
0.76	179.73	184.633	166.836			27.9093	14.2022	1.39548
0.760417	179.398	184.622	166.825			27.6418	14.0894	1.40084
0.760833	179.77	184.748	166.86			28.2411	14.1385	1.40376
0.76125	179.606	184.685	166.887			27.9058	14.1757	1.41226
0.761667	179.744	184.615	166.923			27.4568	14.0508	1.39128
0.762083	179.264	184.548	166.951			27.666	14.1645	1.40157
0.7625	179.222	184.688	166.902			27.66	14.2167	1.36982
0.762917	179.693	184.703	166.697			28.1752	14.0908	1.3794
0.763333	179.242	184.959	166.978			28.1665	14.1029	1.40233
0.76375	179.851	185.03	166.772			28.9204	14.0296	1.41044
0.764167	179.449	184.949	166.857			28.8066	14.0716	1.40142
0.764583	179.452	185.248	166.863			28.667	14.0808	1.38291
0.765	180.006	185.292	166.962			28.2214	14.0943	1.41513
0.765417	179.495	185.102	166.97			28.3247	14.0481	1.4277
0.765833	179.286	185.328	167.01			28.0748	13.9876	1.3963
0.76625	179.88	185.297	167.253			28.1379	14.1111	1.40661
0.766667	179.411	185.118	167.099			28.272	14.1132	1.39304
0.767083	179.563	185.509	166.833			28.4169	14.1896	1.41251
0.7675	179.582	184.936	166.999			28.5174	14.0587	1.41071
0.767917	179.511	185.26	166.959			28.9304	14.1396	1.39709
0.768333	180.231	185.285	167.024			28.581	14.231	1.40175
0.76875	179.423	185.243	167.212			28.914	14.2398	1.43089
0.769167	179.692	185.216	167.44			29.8308	14.0413	1.42401
0.769583	179.435	185.444	167.171			30.1106	14.1624	1.4051
0.77	179.424	185.485	167.409			29.2816	14.1539	1.39859
0.770417	179.482	185.319	167.384			29.9154	14.0326	1.40613
0.770833	179.359	185.285	167.233			30.4718	14.2011	1.3936
0.77125	179.428	185.445	167.392			30.5216	14.2114	1.41779
0.771667	179.378	185.411	167.385			30.6095	14.1587	1.40038
0.772083	178.815	185.402	167.429			30.722	13.9879	1.40367
0.7725	179.173	185.366	167.302			30.9089	13.9954	1.40806
0.772917	179.702	185.582	167.133			30.9988	14.0491	1.43864
0.773333	179.028	185.345	167.163			31.0788	14.1417	1.42516
0.77375	179.232	185.687	167.1			31.1868	13.964	1.40629
0.774167	179.462	185.737	167.058			31.1789	13.9592	1.42643
0.774583	179.018	185.463	167.599			31.0015	14.0169	1.41256
0.775	178.707	185.612	167.333			30.7765	13.9989	1.41908
0.775417	178.435	185.501	167.06			30.4705	14.1036	1.41973
0.775833	179.389	185.626	167.058			30.0808	14.1707	1.45856
0.77625	179.26	185.492	167.22			29.8138	14.2332	1.42538
0.776667	179.179	185.553	167.404			30.5548	14.0398	1.41437
0.777083	178.863	185.578	167.434			30.3489	14.1208	1.42022
0.7775	178.387	185.776	167.305			30.0339	14.1783	1.41258
0.777917	177.992	185.544	167.363			30.4338	14.0854	1.40546
0.778333	178.593	185.715	167.311			30.1433	14.0509	1.42181
0.77875	178.449	185.814	167.449			30.1009	14.0729	1.45805
0.779167	179.366	186.483	167.449			30.8375	14.0458	1.42706
0.779583	178.663	185.914	167.522			31.0515	14.1246	1.41109
0.78	178.172	185.533	167.782			30.9776	14.0059	1.42772
0.780417	178.604	185.586	167.3			30.573	14.0622	1.43611
0.780833	178.539	185.549	167.149			31.0763	14.052	1.45167
0.78125	179.096	185.764	167.453			30.299	14.0778	1.43531
0.781667	178.552	185.628	167.463			30.1584	14.1535	1.41721
0.782083	179.038	185.802	167.489			30.5585	14.0185	1.3896
0.7825	178.623	185.706	167.196			30.9422	14.163	1.40592
0.782917	178.072	185.64	167.164			30.8208	14.0949	1.4273
0.783333	178.444	185.788	167.334			31.224	13.9911	1.43568
0.78375	178.34	185.787	167.35			30.8542	13.9807	1.45062
0.784167	178.155	185.894	167.266			31.2284	14.1296	1.43717
0.784583	178.745	185.727	167.446			31.9127	14.1129	1.42774
0.785	178.255	186.039	167.481			31.3137	14.0893	1.41093
0.785417	178.434	185.766	167.308			30.8381	14.0501	1.40517
0.785833	178.347	185.485	167.35			32.1259	14.0234	1.39461
0.78625	178.564	185.654	167.465			31.389	13.9127	1.39816
0.786667	178.887	185.559	168.027			30.9892	14.0343	1.39499
0.787083	177.86	185.605	167.634			31.5425	14.0071	1.41694
0.7875	178.479	185.907	167.569			31.4248	14.1453	1.41607
0.787917	178.953	185.681	167.753			30.6958	14.0053	1.42383
0.788333	178.23	185.754	167.865			30.9264	13.8659	1.42556
0.78875	178.201	185.823	167.824			30.9452	13.9953	1.42
0.789167	178.155	185.778	167.908			31.1875	13.8839	1.43991
0.789583	177.634	185.484	168.36			31.5032	14.0342	1.43074
0.79	178.011	185.583	168.252			31.3136	14.0627	1.44727
0.790417	178.427	185.664	168.176			31.0451	14.0014	1.44663
0.790833	178.22	185.713	168.28			32.157	14.0138	1.44851
0.79125	178.328	185.774	168.604			31.8563	14.069	1.44992
0.791667	178.43	186.428	168.296			32.4743	14.0184	1.42418
0.792083	178.031	185.841	168.368			33.2111	13.9902	1.44333
0.7925	178.121	185.793	167.894			32.3418	14.0546	1.42073
0.792917	177.963	185.908	168.29			32.7457	14.0216	1.43973
0.793333	177.984	185.797	168.03			32.3212	14.065	1.43383
0.79375	178.242	185.768	167.955			33.033	14.125	1.4332
0.794167	177.845	185.692	168.322			32.5531	14.1594	1.42541
0.794583	177.155	185.773	168.226			31.9064	14.2334	1.4203
0.795	177.959	187.303	168.043			31.8195	14.0773	1.42102
0.795417	177.203	186.154	167.485			31.9144	14.0541	1.43539
0.795833	177.64	186.007	167.928			31.7339	14.0561	1.42001
0.79625	178.229	185.815	168.023			32.5776	13.951	1.43304
0.796667	177.87	185.651	167.855			32.1117	14.1301	1.41196
0.797083	177.604	185.853	167.257			32.5005	14.026	1.41755
0.7975	177.252	185.872	168.08			33.0849	14.0122	1.41697
0.797917	178.171	185.884	167.837			32.8967	14.0031	1.41672
0.798333	177.747	185.914	167.823			32.2997	14.1166	1.40421
0.79875	177.916	186.345	167.836			32.4979	14.1497	1.43528
0.799167	177.39	185.766	167.958			33.5509	13.8697	1.42442
0.799583	177.071	185.728	168.059			33.1213	13.9642	1.428
0.8	177.471	185.916	168.094			33.1484	13.9149	1.42088
0.800417	177.335	185.563	168.21			32.8532	14.027	1.4204
0.800833	177.414	185.626	167.984			33.947	14.1104	1.42899
0.80125	177.683	185.881	167.969			34.6123	13.8493	1.42478
0.801667	177.14	185.764	168.084			34.2832	14.0683	1.43367
0.802083	177.455	185.668	167.939			34.0476	13.9181	1.43806
0.8025	177.212	185.787	168.224			34.5689	14.1268	1.43444
0.802917	177.501	185.587	168.68			33.5492	14.0625	1.44871
0.803333	176.643	185.623	168.146			33.0891	14.0324	1.41947
0.80375	177.085	185.737	167.469			33.4037	13.9427	1.42087
0.804167	176.863	185.76	167.704			33.2642	14.045	1.44449
0.804583	177.386	185.573	168.334			33.6467	14.0472	1.46527
0.805	177.081	185.602	167.991			33.7011	14.0102	1.45829
0.805417	176.739	185.639	167.718			33.8728	14.0915	1.43317
0.805833	177.029	185.602	167.937			34.7078	14.2063	1.44362
0.80625	176.823	185.62	168.224			34.0625	13.9934	1.44574
0.806667	176.702	185.768	168.681			33.4579	14.1534	1.45881
0.807083	177.067	185.547	168.014			33.4674	14.0622	1.44755
0.8075	177.013	185.473	168.389			33.9236	14.068	1.43721
0.807917	176.496	185.511	167.75			34.8307	14.1221	1.43867
0.808333	177.018	185.722	168.211			34.4323	14.0441	1.45009
0.80875	176.289	185.733	168.619			34.9988	13.9539	1.41813
0.809167	176.492	185.63	168.304			35.311	13.9695	1.42106
0.809583	176.335	185.636	168.257			34.5195	13.8844	1.46287
0.81	177.067	185.633	168.133			34.4206	14.0228	1.42228
0.810417	177.382	185.548	168.101			35.0328	14.0808	1.42289
0.810833	176.342	185.494	168.342			34.2867	14.013	1.44494
0.81125	176.397	185.55	168.081			34.1433	14.0056	1.44574
0.811667	176.418	185.458	168.163			33.7747	14.0124	1.41732
0.812083	175.953	185.581	168.37			35.032	13.9532	1.45152
0.8125	177.055	185.633	168.701			35.0153	13.9496	1.43181
0.812917	176.14	185.406	168.902			35.475	14.0056	1.44083
0.813333	176.183	185.656	168.601			35.0228	13.9353	1.43682
0.81375	176.18	185.597	168.442			35.1521	13.9982	1.45233
0.814167	176.311	185.531	168.161			34.6513	14.0011	1.44806
0.814583	176.515	185.317	168.503			34.5558	14.0353	1.43883
0.815	175.79	185.415	168.393			34.6739	13.9878	1.44907
0.815417	175.607	185.971	168.437			35.5397	14.0631	1.46299
0.815833	175.467	185.609	168.469			35.2107	14.0824	1.44752
0.81625	176.453	185.488	168.592			35.7818	14.0162	1.44339
0.816667	175.733	185.55	167.677			34.8871	13.9793	1.43688
0.817083	175.76	185.415	168.283			34.7054	14.066	1.42844
0.8175	176.082	185.545	168.211			35.6122	13.987	1.43626
0.817917	175.622	185.385	168.656			35.4683	13.9692	1.439
0.818333	176.083	185.465	168.791			35.4588	13.9408	1.4397
0.81875	175.935	185.363	168.684			35.9069	13.8394	1.42806
0.819167	175.414	185.544	168.501			35.4975	14.0366	1.41406
0.819583	176.272	185.371	168.473			35.7085	14.0879	1.43587
0.82	175.65	185.453	168.155			36.422	14.1419	1.42128
0.820417	175.906	185.487	168.621			36.2931	13.985	1.46119
0.820833	176.496	185.437	168.694			36.3466	13.9599	1.44211
0.82125	176.376	185.637	168.221			36.7065	13.9955	1.43863
0.821667	175.784	185.581	168.262			36.3537	13.9094	1.43463
0.822083	175.544	185.464	168.441			37.2599	13.9724	1.43954
0.8225	175.661	185.16	168.34			36.8632	13.8617	1.46395
0.822917	175.394	185.312	168.491			36.9868	14.0689	1.43497
0.823333	175.668	185.439	168.144			36.4891	14.0034	1.42161
0.82375	175.27	185.241	168.438			36.2586	14.0628	1.41283
0.824167	175.864	185.333	168.776			36.3075	14.1177	1.43697
0.824583	175.98	185.283	168.702			36.3797	14.069	1.41451
0.825	175.188	185.179	168.503			37.1148	14.1013	1.44886
0.825417	175.132	185.362	168.503			36.8142	14.0387	1.43766
0.825833	175.679	185.312	168.321			36.7113	13.9011	1.42297
0.82625	175.294	185.44	168.435			37.1829	13.9732	1.43788
0.826667	175.486	185.408	168.663			36.9759	13.908	1.44219
0.827083	175.043	185.555	168.417			37.8272	13.9303	1.42843
0.8275	175.239	185.384	168.632			38.3464	14.0226	1.46317
0.827917	174.938	185.179	168.708			38.6196	13.898	1.4722
0.828333	175.243	185.383	168.514			37.1689	13.9392	1.45476
0.82875	174.474	185.361	168.809			36.6028	13.9031	1.44834
0.829167	174.662	185.418	168.468			37.7002	14.0561	1.45637
0.829583	174.759	185.435	168.487			37.3484	13.9731	1.47367
0.83	174.104	185.268	168.181			37.0421	13.9807	1.46371
0.830417	174.954	185.303	168.245			36.9423	14.0351	1.46643
0.830833	174.56	185.141	168.226			37.2515	13.8413	1.44175
0.83125	174.82	185.141	168.129			37.6847	13.8169	1.44867
0.831667	174.579	185.293	168.021			37.4279	14.0043	1.44374
0.832083	174.315	185.279	168.073			37.9019	13.9012	1.44747
[truncated: 87 more rows]

## Sheet: Panel B mannitol MRS
Time (days)	uA/cm2	uA/cm2	uA/cm2		Current production by L. plantarum in mMRS under different conditions.
	4	5	6
0	5.64459	7.9056	8.9708
0.000416667	2.81956	4.863	5.97703
0.000833333	2.32073	3.75342	4.84272
0.00125	1.84448	3.00336	4.20961
0.00167	1.57149	2.90295	3.86185
0.00208	1.38088	2.67736	3.624
0.0025	1.25416	2.52861	3.56995
0.00292	1.14979	2.42946	3.33441
0.00333	1.09061	2.35996	3.23823
0.00375	1.03787	2.28722	3.10794
0.00417	0.98123	2.23011	3.02169
0.00458	0.95048	2.18963	2.9643
0.005	0.91533	2.14819	2.91263
0.00542	0.89478	2.08973	2.87611
0.00583	0.86042	2.04902	2.83678
0.00625	0.84519	2.03142	2.74848
0.00667	0.83483	1.99298	2.70149
0.00708	0.82376	1.99209	2.6804
0.0075	0.78684	1.96499	2.6277
0.00792	0.77845	1.94191	2.59205
0.00833	0.77336	1.93942	2.56863
0.00875	0.75272	1.92672	2.53773
0.00917	0.74948	1.89791	2.50227
0.00958	0.74714	1.87719	2.4532
0.01	0.74	1.8428	2.43008
0.01042	0.7298	1.83949	2.42629
0.01083	0.71598	1.83026	2.4006
0.01125	0.7121	1.80959	2.34492
0.01167	0.7199	1.79206	2.33065
0.01208	0.69752	1.77603	2.29548
0.0125	0.70943	1.77438	2.27425
0.01292	0.69528	1.77088	2.27253
0.01333	0.69103	1.76095	2.23234
0.01375	0.69248	1.7404	2.21206
0.01417	0.68744	1.73819	2.20298
0.01458	0.67632	1.73601	2.16713
0.015	0.67893	1.73676	2.15304
0.01542	0.6676	1.71522	2.12978
0.01583	0.66393	1.71558	2.11964
0.01625	0.67167	1.70286	2.08176
0.01667	0.66127	1.68283	2.05944
0.01708	0.66424	1.67185	2.05463
0.0175	0.65815	1.65116	2.04117
0.01792	0.6712	1.63599	2.02857
0.01833	0.65956	1.64319	2.035
0.01875	0.65721	1.64656	2.00268
0.01917	0.64106	1.61125	1.98626
0.01958	0.65299	1.60989	1.9751
0.02	0.64847	1.61684	1.94834
0.02042	0.65964	1.59322	1.93335
0.02083	0.65258	1.58628	1.93177
0.02125	0.64927	1.5993	1.91157
0.02167	0.65411	1.5778	1.88542
0.02208	0.65284	1.56576	1.86493
0.0225	0.65641	1.57007	1.84411
0.02292	0.6449	1.57351	1.87097
0.02333	0.64606	1.55275	1.86558
0.02375	0.64516	1.54387	1.83106
0.02417	0.6429	1.53173	1.8278
0.02458	0.6438	1.52746	1.80763
0.025	0.6301	1.51617	1.78854
0.02542	0.63223	1.51729	1.78591
0.02583	0.63857	1.50752	1.76263
0.02625	0.63522	1.48355	1.78002
0.02667	0.63747	1.48434	1.75502
0.02708	0.63212	1.48964	1.73541
0.0275	0.64363	1.47376	1.73195
0.02792	0.63174	1.48488	1.71635
0.02833	0.62878	1.46768	1.70934
0.02875	0.62894	1.464	1.71447
0.02917	0.6399	1.45464	1.68913
0.02958	0.62948	1.46056	1.67556
0.03	0.62279	1.45035	1.66766
0.03042	0.6325	1.44887	1.66876
0.03083	0.6203	1.45241	1.6523
0.03125	0.62563	1.43446	1.64468
0.03167	0.62873	1.44867	1.64089
0.03208	0.63721	1.44342	1.64433
0.0325	0.62335	1.43656	1.61779
0.03292	0.62026	1.42448	1.6174
0.03333	0.61555	1.42671	1.60584
0.03375	0.6215	1.42934	1.60197
0.03417	0.6218	1.39244	1.59844
0.03458	0.61542	1.37879	1.57927
0.035	0.61295	1.37848	1.56181
0.03542	0.61932	1.38381	1.55558
0.03583	0.61282	1.37739	1.5395
0.03625	0.61462	1.35969	1.52005
0.03667	0.60549	1.34944	1.50267
0.03708	0.60905	1.33123	1.48512
0.0375	0.60135	1.33696	1.44464
0.03792	0.60525	1.33248	1.4277
0.03833	0.60651	1.42895	1.94717
0.03875	0.59998	1.60565	1.88227
0.03917	0.5882	1.52661	1.68005
0.03958	0.78326	1.46314	1.60501
0.04	0.87665	1.45869	1.57489
0.04042	0.85455	1.46063	1.55573
0.04083	0.8805	1.48698	1.56349
0.04125	0.91839	1.48842	1.58205
0.04167	0.92862	1.5182	1.59595
0.04208	0.96367	1.55421	1.6346
0.0425	0.98295	1.58844	1.66363
0.04292	0.99338	1.6261	1.71145
0.04333	1.01487	1.69691	1.76584
0.04375	1.02623	1.75989	1.84334
0.04417	1.0378	1.80292	1.90122
0.04458	1.0483	1.85957	1.98227
0.045	1.0764	1.92985	2.05425
0.04542	1.0928	1.97682	2.13791
0.04583	1.09598	2.02491	2.19625
0.04625	1.12193	2.1066	2.26201
0.04667	1.12995	2.15732	2.33662
0.04708	1.14865	2.21469	2.3984
0.0475	1.16281	2.28415	2.45588
0.04792	1.18169	2.36169	2.53298
0.04833	1.2003	2.40764	2.59158
0.04875	1.21246	2.45299	2.65585
0.04917	1.23133	2.49986	2.71451
0.04958	1.23879	2.52892	2.78484
0.05	1.27924	2.58967	2.84636
0.05042	1.29226	2.59694	2.90303
0.05083	1.31648	2.65738	2.96745
0.05125	1.34327	2.73462	3.02953
0.05167	1.35896	2.77069	3.07278
0.05208	1.39448	2.82915	3.1381
0.0525	1.44601	2.86674	3.19227
0.05292	1.46838	2.88269	3.25595
0.05333	1.52195	2.96003	3.27519
0.05375	1.56412	2.9911	3.35008
0.05417	1.61258	3.05418	3.38773
0.05458	1.66451	3.12206	3.46631
0.055	1.73942	3.14891	3.51499
0.05542	1.82034	3.19469	3.59633
0.05583	1.89763	3.27024	3.63254
0.05625	1.96419	3.31539	3.7018
0.05667	2.06064	3.34873	3.76345
0.05708	2.11457	3.37565	3.79472
0.0575	2.20863	3.41157	3.85116
0.05792	2.27223	3.52904	3.93447
0.05833	2.37028	3.55074	3.98115
0.05875	2.44644	3.56081	4.02824
0.05917	2.52015	3.65093	4.10122
0.05958	2.60094	3.7105	4.12655
0.06	2.63714	3.74001	4.20774
0.06042	2.7791	3.87449	4.27193
0.06083	2.80983	3.92159	4.33662
0.06125	2.87783	4.02073	4.38706
0.06167	2.9724	4.09875	4.44229
0.06208	3.01124	4.08732	4.50659
0.0625	3.10593	4.1349	4.57051
0.06292	3.16846	4.20235	4.64346
0.06333	3.23373	4.26504	4.70665
0.06375	3.28174	4.29329	4.76274
0.06417	3.39323	4.33195	4.82166
0.06458	3.38545	4.45542	4.87107
0.065	3.49975	4.52804	4.93919
0.06542	3.61272	4.58921	5.02374
0.06583	3.6273	4.65098	5.12605
0.06625	3.77825	4.6844	5.15531
0.06667	3.78211	4.77034	5.18912
0.06708	3.78856	4.99546	5.24356
0.0675	3.8058	5.01006	5.30754
0.06792	3.83723	5.0905	5.35922
0.06833	4.00487	5.19841	5.44625
0.06875	4.08247	5.22774	5.52714
0.06917	4.15454	5.27077	5.58109
0.06958	4.18705	5.52325	5.62898
0.07	4.33979	5.52415	6.24863
0.07042	4.35567	5.65368	5.88188
0.07083	4.39565	5.6879	5.91558
0.07125	4.44846	5.76567	5.98922
0.07167	4.49134	5.82861	6.09981
0.07208	4.48332	5.92022	6.17605
0.0725	4.49024	5.97933	6.22237
0.07292	4.72997	6.02286	6.28476
0.07333	4.7469	6.20138	6.42548
0.07375	4.81186	6.22853	6.48688
0.07417	4.8327	6.32933	6.61075
0.07458	4.92337	6.45446	6.71791
0.075	4.79977	6.37092	6.86743
0.07542	5.04723	6.42905	6.9682
0.07583	5.25528	6.51167	7.04045
0.07625	5.16312	6.74812	7.16408
0.07667	5.26916	6.70048	7.26009
0.07708	5.35955	6.82573	7.33907
0.0775	5.50836	6.91588	7.38567
0.07792	5.56512	7.09293	7.54236
0.07833	5.3753	7.17438	7.61908
0.07875	5.59835	6.93156	7.78056
0.07917	5.47827	7.19538	7.91298
0.07958	5.66645	7.41951	7.99075
0.08	5.63207	7.55324	8.11436
0.08042	5.75559	7.65447	8.24944
0.08083	5.78494	7.7032	8.39423
0.08125	5.94495	7.63845	8.47191
0.08167	6.09013	7.81719	8.58489
0.08208	5.97377	7.87775	8.68172
0.0825	6.12969	7.99925	8.76561
0.08292	6.17568	8.00696	8.96011
0.08333	6.14324	8.15775	8.94054
0.08375	6.31474	8.21891	9.08643
0.08417	6.29332	8.43163	9.1675
0.08458	6.34478	8.24762	9.27341
0.085	6.3939	8.35496	9.36872
0.08542	6.50202	8.66094	9.54356
0.08583	6.58471	8.53789	9.62341
0.08625	6.62326	8.76257	9.68655
0.08667	6.72704	8.72003	9.80642
0.08708	6.78579	8.77324	9.92456
0.0875	6.78613	9.01962	9.96935
0.08792	6.81761	9.01025	10.1345
0.08833	6.87548	9.01953	10.2369
0.08875	6.94659	9.0724	10.4221
0.08917	7.15476	9.19747	10.4537
0.08958	7.00943	9.22884	10.5192
0.09	7.08234	9.29996	10.6463
0.09042	7.31905	9.25747	10.8013
0.09083	7.38963	9.52049	10.8007
0.09125	7.50402	9.51743	11.0511
0.09167	7.47433	9.64827	11.1334
0.09208	7.70777	9.79348	11.2388
0.0925	7.5024	9.79453	11.2556
0.09292	7.6327	9.90039	11.3527
0.09333	7.80185	9.96325	11.5414
0.09375	7.60411	10.1732	11.5857
0.09417	7.88589	10.1173	11.689
0.09458	7.76204	10.0894	11.8157
0.095	7.62333	10.4298	11.9872
0.09542	7.72985	10.5167	12.0794
0.09583	7.79776	10.5094	12.0373
0.09625	7.83723	10.7063	12.1566
0.09667	8.09548	10.7464	12.3112
0.09708	8.03358	10.7436	12.3579
0.0975	8.23619	10.9605	12.5222
0.09792	8.45158	10.8473	12.6489
0.09833	8.16398	11.0621	12.6558
0.09875	8.25844	10.966	12.7593
0.09917	8.38794	11.1006	12.7156
0.09958	8.46227	11.0672	13.0292
0.1	8.47662	11.2519	13.0703
0.10042	8.19859	11.2911	13.1603
0.10083	8.42609	11.7903	13.3941
0.10125	8.58489	11.4043	13.4271
0.10167	8.55389	11.3419	13.5149
0.10208	8.80263	11.6232	13.4931
0.1025	8.91996	11.7089	13.6821
0.10292	9.04114	11.5309	13.8014
0.10333	8.91109	11.8966	13.9106
0.10375	9.24683	11.8971	13.9785
0.10417	9.2891	11.986	14.0507
0.10458	9.55044	12.0459	14.2367
0.105	9.54559	12.0057	14.2643
0.10542	9.5753	12.1657	14.2884
0.10583	9.57673	12.2939	14.5614
0.10625	9.88098	12.3964	14.6899
0.10667	9.8967	12.4975	14.82
0.10708	10.1755	12.4526	14.94
0.1075	10.1638	12.8788	14.9091
0.10792	10.1139	12.7275	15.0773
0.10833	10.3396	12.6597	15.1879
0.10875	10.7115	12.6794	15.3004
0.10917	10.8071	12.9455	15.4002
0.10958	10.897	13.0027	15.5985
0.11	10.906	12.9477	15.6877
0.11042	11.451	13.2687	15.8362
0.11083	11.521	13.4052	15.7566
0.11125	11.5937	13.341	15.9602
0.11167	11.68	13.4926	16.022
0.11208	11.7981	13.6091	16.1001
0.1125	12.0284	13.7232	16.3092
0.11292	12.2057	13.8293	16.364
0.11333	12.4392	13.8557	16.4818
0.11375	12.8272	13.6654	16.5228
0.11417	12.8895	14.014	16.7138
0.11458	13.2945	14.1179	16.8787
0.115	13.1318	14.2394	16.8648
0.11542	13.3504	14.1427	16.9878
0.11583	13.4856	14.4692	17.2064
0.11625	13.921	14.6138	17.4034
0.11667	13.8487	14.8382	17.5885
0.11708	14.6501	14.7174	17.6468
0.1175	14.3904	15.1669	17.8527
0.11792	15.0107	15.2409	18.0651
0.11833	15.4524	14.9535	18.0754
0.11875	15.4017	15.5272	18.3562
0.11917	15.8069	15.5194	18.4794
0.11958	15.802	15.6493	18.6255
0.12	16.2563	15.9724	18.8593
0.12042	16.459	16.0103	19.1243
0.12083	16.7193	16.5109	19.4012
0.12125	17.2901	16.2807	19.57
0.12167	17.3548	16.4162	19.9376
0.12208	17.7918	16.3797	19.9427
0.1225	18.0032	16.7229	20.1741
0.12292	18.2353	16.6557	20.4915
0.12333	18.5621	16.9212	20.7155
0.12375	18.6424	17.021	21.0063
0.12417	18.9265	16.7454	21.125
0.12458	18.9871	17.1468	21.3786
0.125	19.199	17.1133	21.6895
0.12542	20.1358	17.1434	21.8087
0.12583	19.9426	17.0173	22.027
0.12625	20.5746	17.1195	22.0274
0.12667	20.2865	16.8261	22.5968
0.12708	20.1886	17.2212	22.6957
0.1275	21.5848	17.139	22.9008
0.12792	21.8379	17.4164	23.0915
0.12833	22.2253	17.4866	23.1023
0.12875	22.4945	17.417	23.2852
0.12917	22.3375	17.3196	23.329
0.12958	22.3467	17.6458	23.4852
0.13	22.0114	17.544	23.6583
0.13042	22.7125	17.7971	23.6899
0.13083	22.6716	17.659	23.9615
0.13125	22.6106	17.6167	23.9615
0.13167	23.1326	17.5066	24.0689
0.13208	22.7758	17.5568	24.301
0.1325	23.2721	17.6819	24.2843
0.13292	23.0032	17.948	24.3162
0.13333	24.2367	17.8442	24.4749
0.13375	24.3105	18.1218	24.5216
0.13417	23.6645	18.3184	24.5601
0.13458	23.2545	18.0454	24.4325
0.135	24.519	18.2357	24.7319
0.13542	24.3781	18.5545	24.6972
0.13583	23.6388	18.4133	24.8298
0.13625	24.3779	18.5145	24.8199
0.13667	24.7869	18.2759	24.9056
0.13708	24.2977	18.5353	25.0807
0.1375	24.3241	18.558	25.2718
0.13792	24.7485	18.5548	25.3765
0.13833	24.5891	18.501	25.2756
0.13875	24.8081	18.6468	25.1989
0.13917	24.6002	18.3745	25.4483
0.13958	23.9148	18.6852	25.4278
0.14	25.5871	18.8741	25.2054
0.14042	24.7452	18.5692	25.4373
0.14083	24.7933	18.4781	25.4152
0.14125	25.4281	18.8089	25.4265
0.14167	25.0171	18.9085	25.4487
0.14208	25.1651	18.7215	25.5872
0.1425	24.8793	18.8214	25.7129
0.14292	25.8104	18.7871	25.8603
0.14333	24.5785	19.3875	25.7123
0.14375	24.9951	19.2406	25.7526
0.14417	25.6541	19.1846	25.829
0.14458	25.7537	19.2362	25.8629
0.145	26.2713	19.3551	25.8974
0.14542	25.7643	19.4983	26.0362
0.14583	24.94	18.903	26.1049
0.14625	25.4734	19.2136	26.0116
0.14667	25.7324	19.4321	26.1689
0.14708	26.4707	19.5439	26.256
0.1475	25.9127	19.3048	26.2718
0.14792	25.5826	19.6495	26.3829
0.14833	26.3756	19.7113	26.3142
0.14875	26.7833	19.7353	26.3903
0.14917	25.8246	20.1271	26.6135
0.14958	26.7598	20.1331	26.5816
0.15	26.3129	19.9694	26.4525
0.15042	27.1353	20.084	26.6057
0.15083	26.274	20.4843	26.6953
0.15125	26.0203	20.4685	26.9501
0.15167	26.9604	20.8152	27.0383
0.15208	26.5127	20.3205	26.9996
0.1525	26.684	20.4309	26.9628
0.15292	26.4011	20.5741	27.0065
0.15333	27.0866	20.8834	26.9667
0.15375	26.2837	20.7538	27.1769
0.15417	26.8563	20.7139	27.1161
0.15458	27.6245	20.8398	27.2578
0.155	27.8558	20.7428	27.5638
0.15542	27.5834	21.2494	27.4758
0.15583	26.8481	21.5215	27.5319
0.15625	26.9411	21.3058	27.4439
0.15667	26.653	21.6293	27.5946
0.15708	27.551	21.7986	27.5716
0.1575	27.5776	21.6528	27.7469
0.15792	27.6732	21.9508	27.7924
0.15833	27.245	22.3965	28.1106
0.15875	27.7681	22.1537	27.8012
0.15917	27.6909	22.6304	28.0239
0.15958	28.0809	22.8342	28.1989
0.16	28.5568	22.8109	28.1897
0.16042	27.9165	22.9202	28.1767
0.16083	28.2534	23.2692	28.2505
0.16125	28.7972	23.4328	28.0776
0.16167	29.5276	24.4243	28.1119
0.16208	29.5721	25.0955	27.9451
0.1625	29.9161	25.0338	28.154
0.16292	29.6011	25.2401	28.1416
0.16333	29.6904	25.4043	28.1837
0.16375	30.1745	25.7614	28.6276
0.16417	29.3764	25.9439	28.6963
0.16458	29.5978	26.2169	28.8139
0.165	29.0065	26.5221	29.0183
0.16542	30.2334	26.4927	29.0236
0.16583	29.7163	26.5066	29.0351
0.16625	30.195	26.7008	29.2028
0.16667	31.109	26.7459	29.663
0.16708	30.7023	26.9743	29.8383
0.1675	31.0151	27.3896	29.9591
0.16792	30.3363	27.2852	30.2388
0.16833	30.9239	27.5844	30.615
0.16875	31.5095	27.7814	30.6454
0.16917	32.1052	27.6373	30.785
0.16958	31.7257	27.7049	31.1744
0.17	32.1227	27.8291	31.3419
0.17042	32.566	28.0953	31.5555
0.17083	32.4297	28.1181	31.97
0.17125	32.4742	28.2764	32.3047
0.17167	32.6157	28.418	32.379
0.17208	33.6421	28.421	32.5136
0.1725	33.027	28.4922	32.7025
0.17292	33.1258	28.9249	33.1625
0.17333	33.4737	28.7099	33.3549
0.17375	34.0489	28.8979	33.5146
0.17417	33.9426	29.0064	34.0428
0.17458	33.7455	29.0607	34.1554
0.175	33.7189	29.2941	34.3838
0.17542	34.2781	29.352	34.5561
0.17583	34.542	29.3966	34.5712
0.17625	34.0026	29.2015	34.8051
0.17667	34.7033	29.6156	35.0441
0.17708	34.7373	29.7377	34.9044
0.1775	34.8372	29.9778	35.2844
0.17792	34.6241	29.9382	35.2138
0.17833	34.833	29.9036	35.6711
0.17875	35.37	30.4255	35.8088
0.17917	35.8939	30.4925	35.7782
0.17958	34.9486	30.4156	35.978
0.18	35.0741	30.509	36.153
0.18042	35.0862	30.5388	36.4174
0.18083	35.9133	30.8785	36.2908
0.18125	36.4563	30.9887	36.4037
0.18167	36.8124	30.7779	36.4508
0.18208	36.5327	31.1885	36.602
0.1825	36.1544	31.2371	36.7239
0.18292	36.6745	31.3465	37.2611
0.18333	35.5659	31.3511	37.327
0.18375	36.4979	31.5321	37.4942
0.18417	35.8708	31.6951	37.4047
0.18458	37.2828	31.7837	37.2692
0.185	36.5712	31.9219	37.5043
0.18542	36.5166	31.9071	37.9153
0.18583	36.7115	32.069	37.662
0.18625	37.5866	32.1799	37.9365
0.18667	38.0164	32.3162	37.9476
0.18708	37.3739	32.3263	38.1968
0.1875	37.7342	32.4722	38.4425
0.18792	37.5933	32.4284	38.2785
0.18833	36.76	32.6031	38.5289
0.18875	37.1461	32.6612	38.7597
0.18917	38.3495	32.793	38.5843
0.18958	38.2549	32.8136	38.666
0.19	38.2713	33.0744	38.941
0.19042	37.2701	33.0514	39.0814
0.19083	37.1315	33.1016	39.1501
0.19125	37.7873	33.2623	39.0613
0.19167	38.4061	33.4517	39.4934
0.19208	37.7836	33.46	39.3611
0.1925	39.0495	33.6777	39.633
0.19292	38.1604	33.73	39.5264
0.19333	38.482	33.7114	39.7279
0.19375	39.301	33.6266	39.7558
0.19417	38.6368	33.7516	39.8953
0.19458	38.6258	33.7612	39.9548
0.195	39.141	34.0542	40.016
0.19542	39.4363	34.3133	40.2806
0.19583	39.6349	34.5716	40.3086
0.19625	38.6905	34.4315	40.3341
0.19667	39.212	34.4265	40.6736
0.19708	39.4115	34.683	40.8229
0.1975	39.3666	34.737	40.8481
0.19792	39.4521	34.6972	40.7657
0.19833	39.5536	34.8859	40.9031
0.19875	39.6045	35.1897	40.9508
0.19917	39.9273	35.18	41.2632
0.19958	39.5559	35.233	41.248
0.2	39.5988	35.2423	41.4114
0.20042	39.8859	35.4912	41.656
0.20083	39.5038	35.6061	41.683
0.20125	40.551	35.4799	41.4472
0.20167	40.4218	35.4881	41.6009
0.20208	39.8205	35.6082	41.8373
0.2025	40.76	35.7227	41.8854
0.20292	40.7906	36.0276	42.0002
0.20333	40.6554	36.0245	42.082
0.20375	40.5049	36.2414	42.46
0.20417	41.4831	36.1636	42.3737
0.20458	40.6987	36.341	42.5017
0.205	41.7301	36.1721	42.5642
0.20542	42.1752	36.378	42.7058
0.20583	41.8684	36.6466	42.9058
0.20625	41.2234	36.7186	42.8744
0.20667	41.4448	36.7181	43.2241
0.20708	41.7594	36.7734	43.0268
0.2075	40.8906	37.0435	43.6541
0.20792	41.8815	37.1466	43.2963
0.20833	41.1022	37.2308	43.5866
0.20875	41.072	37.4036	43.4284
0.20917	42.4345	37.1987	43.7747
0.20958	42.1587	37.3313	43.8417
0.21	42.5748	37.5289	44.0445
0.21042	42.6908	37.837	43.8536
0.21083	41.5854	37.8197	44.2132
0.21125	43.2538	37.8619	44.0855
0.21167	42.5668	37.9153	44.1693
0.21208	43.3128	38.3424	44.3288
0.2125	43.2972	37.9951	44.4458
0.21292	43.5451	38.1537	44.8475
0.21333	43.0726	38.394	44.9815
0.21375	43.2115	38.4833	45.0389
0.21417	43.7225	38.7656	45.079
0.21458	43.2946	38.7892	45.2199
0.215	43.3351	39.0973	45.3894
0.21542	44.2012	38.9627	45.4882
0.21583	42.9714	39.0742	45.8505
0.21625	44.0304	39.1264	45.8558
0.21667	43.423	39.3554	45.876
0.21708	45.5117	39.2707	45.8721
0.2175	44.4686	39.6542	46.0734
0.21792	44.0246	39.5738	46.3296
0.21833	44.553	39.5474	46.3116
0.21875	43.6877	39.5187	46.2989
0.21917	45.1278	39.6647	46.7262
0.21958	44.5494	39.9322	46.4675
0.22	44.7728	40.1639	46.7379
0.22042	45.1912	40.4354	47.0872
0.22083	44.1925	40.3912	47.225
0.22125	45.6251	40.1955	47.1579
0.22167	45.0766	40.4318	47.2448
0.22208	46.6231	40.3438	47.6798
0.2225	45.4725	40.7708	47.6364
0.22292	46.3907	41.0484	47.7997
0.22333	46.5657	41.048	47.9934
0.22375	46.6103	41.0697	48.0472
0.22417	45.8225	41.3483	48.1818
0.22458	46.6432	41.1792	48.3142
0.225	46.7083	41.3007	48.6309
0.22542	47.8113	41.5692	48.7442
0.22583	47.6508	41.7041	48.8044
0.22625	46.9458	41.6684	49.0702
0.22667	47.3806	41.9108	49.1814
0.22708	46.6278	42.1204	49.1999
0.2275	46.4134	42.1005	49.3531
0.22792	47.3076	42.1463	49.3738
0.22833	47.7412	42.1588	49.6609
0.22875	47.7794	42.1914	49.932
0.22917	48.2463	42.9541	49.8312
0.22958	48.2964	42.878	49.9824
0.23	48.3092	42.844	50.1682
0.23042	48.236	43.163	50.2924
0.23083	48.7542	43.4082	50.4942
0.23125	49.5558	43.4174	50.6696
0.23167	49.6862	43.6024	50.5701
0.23208	49.8497	43.9097	50.7911
0.2325	49.8563	44.008	51.0255
0.23292	49.6584	44.0152	51.0956
0.23333	48.9351	44.2014	51.3088
0.23375	49.4749	44.4193	51.49
0.23417	51.6467	44.2872	51.9699
0.23458	51.9668	44.5942	52.0225
0.235	50.7457	44.7063	52.3621
0.23542	50.6545	44.9728	52.0514
0.23583	50.8526	44.91	52.2202
0.23625	50.6561	45.1508	52.5299
0.23667	50.5818	45.2785	52.9228
0.23708	52.3049	45.5969	52.8277
0.2375	52.2066	45.5862	53.0939
0.23792	51.761	45.7435	53.1347
0.23833	52.592	45.7172	53.5495
0.23875	53.2204	45.862	53.6762
0.23917	53.292	46.2594	53.9157
0.23958	53.4475	46.491	53.8172
0.24	52.5371	46.6504	54.0149
0.24042	53.3409	46.9424	54.4717
0.24083	54.0066	47.063	54.7516
0.24125	54.0322	47.6291	54.7911
0.24167	54.3774	47.5531	54.8891
0.24208	55.1233	47.9817	55.1458
0.2425	55.3734	47.9647	55.3715
0.24292	55.0716	48.271	55.9799
0.24333	56.0289	48.4501	55.7776
0.24375	55.685	49.0609	56.253
0.24417	57.0312	49.3662	56.1002
0.24458	57.1574	49.6369	56.7414
0.245	56.8021	50.018	56.6935
0.24542	57.5499	50.3915	56.9829
0.24583	58.2598	50.5655	57.5797
0.24625	59.1403	51.1545	57.4955
0.24667	58.9609	51.7831	58.1897
0.24708	59.6886	52.5737	58.2413
0.2475	60.6978	52.9302	58.7508
0.24792	61.7827	53.7903	59.0732
0.24833	61.5724	54.4001	59.6104
0.24875	62.7516	54.9323	60.1546
0.24917	63.8535	55.4711	60.3952
0.24958	64.6159	56.2866	61.0552
0.25	65.6885	57.1502	61.6713
0.25042	64.0043	58.0062	62.9448
0.25083	66.4898	58.641	62.9906
0.25125	68.3369	59.2046	63.5722
0.25167	67.1993	59.8706	64.3547
0.25208	68.2199	60.1302	64.9956
0.2525	67.772	60.0163	65.8888
0.25292	67.6847	59.8912	66.7904
0.25333	67.3786	59.7157	67.4078
0.25375	66.1503	59.1134	67.7026
0.25417	66.4947	59.1131	68.4859
0.25458	65.0585	58.3887	69.0811
0.255	64.8001	57.9585	69.4035
0.25542	65.6153	57.9548	68.8049
0.25583	64.982	57.8658	68.8823
0.25625	64.8469	57.5568	68.7713
0.25667	63.725	56.8738	68.114
0.25708	64.3697	56.8512	68.0476
0.2575	63.2906	56.5112	67.8819
0.25792	63.3292	56.673	67.6581
0.25833	63.2942	56.4727	67.5813
0.25875	64.2735	56.32	67.2436
0.25917	63.6518	56.3336	66.9656
0.25958	64.5584	56.2098	67.0137
0.26	64.4685	56.553	66.5804
0.26042	65.6119	56.7765	66.4469
0.26083	65.2693	56.9674	66.2708
0.26125	64.776	57.1561	66.6916
0.26167	65.3923	57.6441	66.7464
0.26208	65.9689	57.8791	66.9309
0.2625	66.7622	58.2989	66.9752
0.26292	65.7065	58.4501	67.2107
0.26333	67.6859	58.9649	67.4495
0.26375	67.7647	59.2555	67.7724
0.26417	68.1456	59.9135	68.2899
0.26458	68.3628	59.9395	68.6802
0.265	68.5003	60.6232	69.0596
0.26542	69.2804	60.8212	69.7035
0.26583	70.9255	61.2855	70.166
0.26625	70.9495	61.4445	70.6637
0.26667	72.2086	61.6364	70.9106
0.26708	72.7593	62.2993	71.3769
0.2675	72.3314	62.5149	71.8713
0.26792	73.232	62.8926	72.2279
0.26833	72.548	63.436	72.6128
0.26875	73.3806	63.519	73.3197
0.26917	75.0244	64.2869	74.0456
0.26958	74.3977	64.7406	74.3187
0.27	76.0452	64.7149	74.8364
0.27042	75.4188	64.9802	75.4341
0.27083	75.5656	65.5208	75.4329
0.27125	75.2822	65.9314	75.5942
0.27167	75.1652	66.066	76.0022
0.27208	77.2157	66.3982	76.1843
0.2725	75.8875	66.6198	76.7643
0.27292	76.2081	66.8941	76.845
0.27333	76.4667	67.2831	77.2996
0.27375	76.4977	67.4581	77.1786
0.27417	77.1343	67.6527	77.2344
0.27458	76.4653	67.6697	77.6051
0.275	77.4435	67.8627	77.8147
0.27542	78.6468	68.0689	78.3313
0.27583	77.6232	68.0991	78.0002
0.27625	77.2177	68.2589	78.2606
0.27667	77.5072	68.4914	78.6794
0.27708	77.0154	68.377	78.6111
0.2775	77.3548	68.6724	78.9327
0.27792	78.2033	68.9868	78.7657
0.27833	78.0531	68.8237	79.3647
0.27875	77.7447	68.9727	79.4185
0.27917	78.2587	68.9913	79.417
0.27958	78.5918	69.0902	79.3874
0.28	77.9271	69.2378	79.7652
0.28042	79.1015	69.316	79.6043
0.28083	78.5122	69.6168	79.5947
0.28125	78.258	69.5615	80.0229
0.28167	77.7097	69.6059	79.7075
0.28208	78.3254	69.7249	79.8728
0.2825	79.3366	70.0351	80.6183
0.28292	78.1443	69.8735	80.4536
0.28333	77.7584	69.9522	80.5297
0.28375	78.4986	69.9724	80.8943
0.28417	78.6859	70.3485	80.9832
0.28458	79.4941	70.3924	80.7071
0.285	79.0233	69.9665	80.9266
0.28542	79.398	70.2667	81.048
0.28583	79.6267	70.4963	81.2531
0.28625	80.0755	70.5627	81.4394
0.28667	77.9145	70.5337	81.3663
0.28708	78.6779	70.7542	81.5033
0.2875	78.8342	70.5945	81.6398
0.28792	80.3765	70.827	81.8369
0.28833	79.1242	70.5657	81.9081
0.28875	78.6179	71.0519	82.2036
0.28917	78.8699	70.9885	82.1857
0.28958	79.8525	71.1677	81.9336
0.29	79.9902	71.1466	82.1483
0.29042	79.0198	71.286	82.1699
0.29083	80.0983	71.1097	82.3279
0.29125	79.6429	71.1851	82.1883
0.29167	79.1271	71.1618	82.6854
0.29208	78.0393	71.3362	82.549
0.2925	80.0034	71.2873	82.6992
0.29292	79.7163	71.4944	82.9376
0.29333	80.2522	71.5273	82.8929
0.29375	79.7448	71.7409	82.9955
0.29417	79.4545	71.6955	83.1597
0.29458	80.6531	71.9446	83.1804
0.295	80.0385	71.9349	83.1186
0.29542	79.8003	72.1737	83.109
0.29583	80.5931	71.806	83.3544
0.29625	81.614	72.0467	83.3664
0.29667	81.2101	71.8949	83.2465
0.29708	81.1488	72.2727	83.4292
0.2975	80.6867	72.2246	83.6542
0.29792	80.3115	72.5636	83.6282
0.29833	81.6149	72.3738	83.851
0.29875	81.3935	72.4277	83.9686
0.29917	81.0058	72.4073	83.7636
0.29958	81.0724	72.5734	84.0699
0.3	80.8015	72.4463	83.9487
0.30042	81.2186	72.6482	84.0873
0.30083	80.3744	72.6363	84.1585
0.30125	79.7749	72.7694	84.3912
0.30167	80.9205	72.741	84.3287
0.30208	81.9798	72.6094	84.3349
0.3025	82.1618	72.6892	84.6957
0.30292	83.527	72.8518	84.4758
0.30333	81.2164	72.8529	84.6406
0.30375	82.5336	72.916	84.7636
0.30417	82.5279	72.8839	84.8509
0.30458	82.7005	73.1141	84.7201
0.305	81.2868	73.0189	84.7175
0.30542	81.8375	73.3219	84.9788
0.30583	82.1546	73.592	85.1708
0.30625	82.9226	73.242	85.0884
0.30667	82.0968	73.2812	85.4934
0.30708	81.4012	73.4853	85.0792
0.3075	81.3219	73.2325	85.3757
0.30792	82.6362	73.264	85.0301
0.30833	81.1091	73.2693	85.143
0.30875	81.4426	73.5396	85.7
0.30917	82.4211	73.4465	85.6692
0.30958	82.4956	73.5193	85.6393
0.31	82.6284	73.4837	85.7621
0.31042	82.3847	73.7081	85.6296
0.31083	83.0447	73.4699	85.6495
0.31125	82.8497	73.7774	85.9382
0.31167	81.3265	73.6458	85.9023
0.31208	82.2932	73.8114	85.8574
0.3125	82.646	73.7383	86.0274
0.31292	83.1705	73.7301	86.1508
0.31333	82.736	73.8524	86.2258
0.31375	82.7034	73.8493	86.2063
0.31417	83.3517	73.8567	86.0861
0.31458	82.1364	74.2218	86.483
0.315	83.0036	73.8972	86.4785
0.31542	83.2934	74.1471	86.345
0.31583	82.6096	74.0131	86.8332
0.31625	83.271	74.0772	86.9988
0.31667	83.8022	74.2753	86.6838
0.31708	84.0973	74.2636	86.5942
0.3175	83.6691	74.3106	86.9396
0.31792	82.9751	74.4429	87.088
0.31833	83.5165	74.3269	86.8075
0.31875	83.7619	74.4053	86.9419
0.31917	82.8853	74.5705	87.1936
0.31958	83.3005	74.5316	87.0283
0.32	83.6194	74.6521	87.1406
0.32042	84.7889	74.5665	87.0299
0.32083	84.6787	74.6713	87.2041
0.32125	83.5343	74.7736	86.9787
0.32167	84.6237	74.6089	87.4515
0.32208	83.7275	74.9172	86.9706
0.3225	84.4846	74.5668	87.2948
0.32292	84.1493	74.7295	87.1064
0.32333	84.035	74.8506	86.991
0.32375	84.8513	75.2611	87.1823
0.32417	83.2172	75.0998	87.7658
0.32458	84.2347	75.0038	87.9198
0.325	83.7571	75.2569	87.7435
0.32542	82.879	75.1758	87.8551
0.32583	84.6059	75.3262	87.698
0.32625	83.4845	75.3059	87.9356
0.32667	84.8024	75.0925	87.7103
0.32708	85.416	75.2859	87.5734
0.3275	84.6255	75.2768	88.0318
0.32792	84.7735	75.5037	87.6981
0.32833	84.7822	75.3687	87.7723
0.32875	85.3884	75.6012	87.9536
0.32917	84.6218	75.4605	87.9801
0.32958	85.796	75.4725	88.2188
0.33	84.7167	75.6178	88.0881
0.33042	84.5087	75.6464	88.1955
0.33083	85.2717	75.7394	88.3874
0.33125	84.9433	75.8648	88.0801
0.33167	84.8529	75.7939	88.4422
0.33208	84.6078	75.5423	88.1474
0.3325	85.3796	75.6659	88.5882
0.33292	85.117	75.6706	88.2738
0.33333	85.5928	75.7631	88.6365
0.33375	84.3862	75.9731	88.4914
0.33417	85.9232	76.052	88.7135
0.33458	86.1683	76.1405	88.6085
0.335	85.7256	75.8058	88.6246
0.33542	85.3676	76.1976	88.593
0.33583	86.0719	76.1807	88.6614
0.33625	85.7253	76.5718	88.8406
0.33667	86.135	76.3104	88.6549
0.33708	84.9128	76.1671	88.7867
0.3375	86.0059	76.496	88.7049
0.33792	86.2532	76.186	88.6222
0.33833	86.4865	76.5769	88.5743
0.33875	87.4103	76.4927	88.8107
0.33917	86.7893	76.6015	89.0838
0.33958	87.0261	76.5702	88.9735
0.34	85.9916	76.5012	88.9557
0.34042	86.9526	76.5803	89.2948
0.34083	85.7079	76.4149	89.2711
0.34125	87.4969	76.6664	89.0853
0.34167	86.9848	76.6882	89.2851
0.34208	86.9746	76.8417	89.2136
0.3425	86.6156	77.0454	89.4208
0.34292	85.9995	77.204	89.1978
0.34333	86.0523	77.2465	89.223
0.34375	85.7446	76.9919	89.6264
0.34417	86.5567	77.0797	89.6532
0.34458	86.0508	76.9892	89.3744
0.345	87.1237	76.9714	89.5333
0.34542	87.1271	77.0779	89.4111
0.34583	86.7607	77.3311	89.4403
0.34625	87.0882	77.084	89.439
0.34667	85.6787	76.9763	89.5114
0.34708	88.0128	77.4156	89.6331
0.3475	87.5381	77.3976	89.5292
0.34792	87.5083	77.3784	89.6645
0.34833	87.6658	77.3482	89.7794
0.34875	87.9798	77.5146	89.5882
0.34917	86.9317	77.568	89.7907
0.34958	85.9346	77.3837	89.9474
0.35	87.5606	77.5183	89.7004
0.35042	86.9964	77.6737	89.9293
0.35083	87.1953	77.5346	89.8802
0.35125	86.6531	77.7438	89.7055
0.35167	87.1777	77.6646	89.9268
0.35208	87.6082	77.7799	90.1609
0.3525	88.6943	77.5279	89.9306
0.35292	87.9181	77.5365	90.4492
0.35333	87.8949	77.9495	90.3161
0.35375	88.7334	77.775	90.0255
0.35417	88.526	77.8949	90.2689
0.35458	87.6732	78.0657	90.1688
0.355	87.4837	78.2555	90.1904
0.35542	86.6665	78.0602	90.4613
0.35583	87.4036	78.3243	90.6177
0.35625	86.8857	78.2767	89.8476
0.35667	87.6118	78.207	90.4329
0.35708	88.4046	78.1399	90.4998
0.3575	88.0498	78.4199	90.7861
0.35792	89.1148	78.5092	90.4563
0.35833	88.4677	78.4973	90.8656
0.35875	88.1377	78.4744	90.6785
0.35917	89.2729	78.4184	90.9721
0.35958	87.5773	78.4841	90.8703
0.36	87.386	78.9514	90.9165
0.36042	89.9827	78.6423	90.8226
0.36083	88.2752	78.641	90.7537
0.36125	88.8405	78.7778	90.7921
0.36167	88.012	79.0295	90.8783
0.36208	89.092	78.8662	91.148
0.3625	87.9512	78.908	90.7998
0.36292	89.1942	78.5682	90.9876
0.36333	89.1301	78.9418	90.9343
0.36375	88.9286	78.6932	90.9996
0.36417	88.4362	78.8009	91.2076
0.36458	88.6335	78.8034	90.883
0.365	87.646	79.2786	91.1975
0.36542	87.9706	78.9164	90.9742
0.36583	89.1662	79.3024	91.034
0.36625	88.446	79.2721	91.1279
0.36667	88.7332	79.0591	91.3354
0.36708	89.0729	79.3033	91.3398
0.3675	90.0955	79.3721	91.4517
0.36792	90.2788	79.3963	91.1267
0.36833	88.0883	79.481	91.17
0.36875	89.4903	79.2526	91.2648
0.36917	88.9434	79.2784	91.3488
0.36958	88.8195	79.2324	91.402
0.37	89.7313	79.3767	91.3108
0.37042	89.9789	79.3239	91.2933
0.37083	90.526	79.5252	91.6865
0.37125	89.9751	79.7392	91.4966
0.37167	89.0769	79.7625	91.6928
0.37208	89.6353	79.6884	91.3318
0.3725	89.076	79.7441	91.5497
0.37292	89.623	79.6624	91.7359
0.37333	88.7751	79.7461	91.4685
0.37375	88.8303	79.8191	91.4797
0.37417	89.7031	79.5223	91.5946
0.37458	89.833	80.0439	91.517
0.375	89.7464	80.284	91.7207
0.37542	89.9242	79.9479	91.6907
0.37583	90.0568	79.9387	91.886
0.37625	89.3448	80.429	91.65
0.37667	89.9707	80.0886	91.863
0.37708	90.2209	80.2119	92.0577
0.3775	90.7195	80.1041	91.8067
0.37792	90.1784	80.3952	92.0956
0.37833	90.3414	80.212	91.812
0.37875	90.6843	80.2838	91.962
0.37917	91.0322	80.8014	91.9201
0.37958	89.7982	80.4403	92.0566
0.38	90.5007	80.5305	92.5049
0.38042	91.0296	80.3212	92.3451
0.38083	89.2872	80.6568	92.2127
0.38125	90.0366	80.7672	92.0064
0.38167	90.3856	80.7375	92.211
0.38208	91.677	80.538	92.0968
0.3825	90.7712	80.7156	92.4468
0.38292	91.0657	80.6783	91.9899
0.38333	90.4732	80.9709	92.3192
0.38375	90.0671	80.9207	92.1717
0.38417	90.7615	80.8751	92.135
0.38458	90.7734	80.6546	92.2672
0.385	90.6435	81.0382	92.1373
0.38542	91.2586	81.0145	92.1947
0.38583	90.2106	81.0196	92.1441
0.38625	91.4016	81.2845	92.2541
0.38667	90.6814	81.2421	92.3252
0.38708	91.3606	81.1964	92.5791
0.3875	90.7087	81.341	92.3433
0.38792	92.1122	81.1733	92.4043
0.38833	91.7962	81.5244	92.9447
0.38875	90.0903	81.369	92.6087
0.38917	91.8009	81.5348	92.3922
0.38958	90.5574	81.4059	92.5133
0.39	90.774	81.4314	92.6802
0.39042	89.6534	81.2916	92.5946
0.39083	90.4821	81.4967	92.6333
0.39125	91.8932	81.6523	92.89
0.39167	91.4431	81.258	92.7261
0.39208	92.0125	81.5164	92.5387
0.3925	91.934	81.594	92.5645
0.39292	91.8938	81.5767	92.3771
0.39333	91.5128	81.4338	92.631
0.39375	91.3478	81.5199	92.2812
0.39417	91.8394	81.617	92.6051
0.39458	91.6915	81.8648	92.7582
0.395	91.857	81.9361	92.6909
0.39542	91.9965	81.9691	92.7003
0.39583	90.4159	81.9741	92.8941
0.39625	89.3424	81.5234	92.9615
0.39667	90.8117	81.8364	92.3305
0.39708	92.5993	81.9539	92.6648
0.3975	92.4711	81.904	92.5759
0.39792	92.4262	81.9039	92.7023
0.39833	92.0669	81.9395	92.9237
0.39875	91.4517	81.8874	92.694
0.39917	91.7274	82.191	92.7084
0.39958	91.7962	82.1602	92.8757
0.4	91.4385	82.1365	92.7225
0.40042	91.4429	82.2314	92.9107
0.40083	92.019	82.3401	92.8326
0.40125	91.6575	82.2511	92.9764
0.40167	91.2638	82.1827	93.0784
0.40208	90.7617	82.211	92.8416
0.4025	90.8953	82.3196	93.0183
0.40292	91.9719	82.3709	92.9909
0.40333	92.1274	82.5389	93.0448
0.40375	91.6128	82.352	93.1774
0.40417	92.3117	82.3208	93.0163
0.40458	92.1131	82.197	92.8696
0.405	92.7504	82.3156	93.0952
0.40542	92.7369	82.2819	93.1811
0.40583	92.5322	82.4904	93.0749
0.40625	91.6351	82.4932	92.8073
0.40667	92.0689	82.307	92.8889
0.40708	90.8219	82.6636	93.2498
0.4075	90.9979	82.4732	93.1416
0.40792	92.4478	82.6738	93.264
0.40833	91.5603	82.9643	93.0151
0.40875	92.6006	82.6996	92.8714
0.40917	91.5914	82.7489	93.2258
0.40958	91.4708	83.1191	93.1662
0.41	92.8301	82.6959	92.7961
0.41042	92.7307	82.7624	93.2103
0.41083	91.2684	82.9452	93.028
0.41125	92.2788	82.8806	92.9667
0.41167	91.8462	82.8664	93.2132
0.41208	91.4203	82.6804	92.9262
0.4125	90.7555	83.0626	93.5085
0.41292	91.8978	83.1746	93.2132
0.41333	91.9966	82.9082	93.3669
0.41375	92.1582	83.1364	93.0562
0.41417	92.3097	82.9667	93.1947
0.41458	91.8021	83.1778	93.2576
0.415	91.0739	82.9838	93.0456
0.41542	90.8098	83.0658	93.3878
0.41583	92.3165	83.1877	93.2295
0.41625	92.4572	83.2338	92.8794
0.41667	92.021	83.2094	93.3016
0.41708	90.7184	83.0761	93.1884
0.4175	91.7734	83.0861	93.1068
0.41792	92.4397	83.3151	93.2113
0.41833	92.1325	83.477	92.9506
0.41875	92.2112	83.3125	93.1416
0.41917	91.5935	83.317	93.6039
0.41958	91.1863	83.4093	93.3839
0.42	91.1423	83.2765	93.325
0.42042	92.6222	83.6825	93.1946
0.42083	92.3057	83.35	93.2568
0.42125	91.7198	83.3366	93.2536
0.42167	92.6646	83.5473	93.2585
0.42208	92.6142	83.3041	93.4863
0.4225	92.2943	83.33	93.0542
0.42292	91.1373	83.3776	93.2851
0.42333	91.3342	83.4644	93.141
0.42375	92.7685	83.5004	93.268
0.42417	92.3585	83.4129	93.3992
0.42458	92.6446	83.7032	93.3609
0.425	93.1374	83.7993	93.3396
0.42542	91.3538	83.4355	93.0097
0.42583	91.9423	83.5512	93.1538
0.42625	92.5968	83.4633	93.2244
0.42667	92.5407	83.8375	93.1115
0.42708	92.0206	83.7069	93.1032
0.4275	91.2795	83.8475	93.1114
0.42792	91.7989	84.1428	93.2019
0.42833	92.4447	83.8322	93.5938
0.42875	93.1849	84.0205	93.3163
0.42917	91.3634	84.2398	93.2221
0.42958	92.7136	84.0437	93.6805
0.43	92.8728	83.7488	93.2222
0.43042	91.4733	83.9626	93.5171
0.43083	91.5334	84.1636	93.2575
0.43125	91.6237	84.1825	93.1768
0.43167	92.5059	84.0271	93.1817
0.43208	91.8612	83.8137	93.2271
0.4325	91.9761	84.1346	93.3855
0.43292	91.0533	84.1692	93.5649
0.43333	92.7243	84.2071	93.4163
0.43375	91.6035	84.0849	93.4597
0.43417	91.5569	84.1694	93.3155
0.43458	92.2898	84.3564	93.304
0.435	92.427	84.4812	93.3005
0.43542	92.6126	84.3656	93.2148
0.43583	92.2578	84.7253	93.6188
0.43625	93.0501	84.289	93.4511
0.43667	92.0728	84.2888	93.0241
0.43708	93.0382	84.2499	93.0766
0.4375	91.761	84.5442	93.4525
0.43792	91.689	84.554	93.406
0.43833	91.9112	84.6374	93.4767
0.43875	93.0221	84.5837	93.4918
0.43917	91.7653	84.6613	93.3666
0.43958	92.6712	84.6369	93.3565
0.44	92.1862	84.5997	92.9443
0.44042	92.4453	84.8291	93.2882
0.44083	91.6818	84.4429	93.3314
0.44125	91.5905	84.6171	93.1281
0.44167	92.7878	84.5439	93.3215
0.44208	92.9039	84.5604	93.1967
0.4425	91.4593	84.6785	93.3459
0.44292	91.827	84.7918	93.1837
0.44333	91.6611	84.9392	93.0892
0.44375	92.8571	84.7307	93.4475
0.44417	92.2432	84.5848	93.4299
0.44458	91.5856	84.7992	93.3654
0.445	91.9152	84.8335	93.3267
0.44542	91.886	84.7439	93.2487
0.44583	91.2704	85.152	93.2718
0.44625	91.2182	85.0178	93.0798
0.44667	92.4062	85.0661	93.1473
0.44708	93.1532	84.8954	93.2514
0.4475	92.8233	84.7926	93.2037
0.44792	93.1993	85.031	93.0522
0.44833	92.3403	84.7191	93.1604
0.44875	91.4433	85.0736	93.4332
0.44917	90.7138	85.1354	93.5925
0.44958	92.2541	85.011	93.3288
0.45	92.8733	85.0436	93.4299
0.45042	91.6627	85.424	93.5263
0.45083	92.1051	85.1431	93.2301
0.45125	91.9629	85.2189	93.1937
0.45167	92.3087	85.1055	93.3109
0.45208	91.7456	85.062	93.2627
0.4525	91.1566	85.1998	93.4239
0.45292	92.2851	85.2455	93.3409
0.45333	92.3777	85.1329	93.3222
0.45375	92.4548	85.4078	93.1198
0.45417	90.3828	85.5556	93.328
0.45458	92.0137	85.3978	93.4774
0.455	92.2553	85.3224	93.1993
0.45542	92.2659	85.6571	93.378
0.45583	91.4268	85.3146	93.1115
0.45625	91.6236	85.3337	93.13
0.45667	92.0985	85.3325	93.1434
0.45708	90.8122	85.5043	93.4106
0.4575	92.1554	85.4683	93.1401
0.45792	92.9249	85.6432	93.2714
0.45833	91.4924	85.4223	93.1364
0.45875	91.7916	85.5778	93.3736
0.45917	91.7166	85.4505	93.3233
0.45958	90.7769	85.6185	93.4324
0.46	91.2722	85.4516	93.4279
0.46042	91.715	85.4994	93.0607
0.46083	91.5151	85.5961	93.2261
0.46125	91.3447	85.515	93.1852
0.46167	91.206	85.5882	93.1439
0.46208	93.1378	85.775	93.3196
0.4625	91.1861	85.6095	93.2702
0.46292	92.146	85.7517	93.0308
0.46333	92.4751	85.7359	93.0344
0.46375	92.5662	85.8332	93.348
0.46417	90.6378	85.9664	93.1953
0.46458	91.0794	85.589	93.1721
0.465	90.4353	85.6991	93.1863
0.46542	91.9339	85.8528	93.229
0.46583	91.213	85.802	93.0786
0.46625	91.2249	85.8756	92.9662
0.46667	91.6141	85.6841	93.1309
0.46708	92.9642	85.9117	93.2128
0.4675	92.1345	85.8343	93.4515
0.46792	92.288	85.9495	93.5524
0.46833	90.8639	85.934	93.1884
0.46875	91.7146	86.1361	93.0829
0.46917	92.3146	85.9537	93.0821
0.46958	92.0204	86.0123	92.8103
0.47	92.0729	85.9106	93.0556
0.47042	91.4562	86.0666	93.3453
0.47083	91.456	85.9388	93.0627
0.47125	92.3796	85.8962	93.2203
0.47167	91.8146	86.055	93.2856
0.47208	91.5564	86.1894	92.8222
0.4725	91.4379	85.9155	93.0045
0.47292	92.0567	86.1988	93.2349
0.47333	91.9922	86.0959	93.0724
0.47375	92.2608	86.0474	93.2665
0.47417	91.5334	85.9658	93.2022
0.47458	91.7069	86.0679	93.0602
0.475	91.7906	86.1553	93.1112
0.47542	91.49	86.2431	93.1596
0.47583	91.5977	86.2994	93.4203
0.47625	91.0063	86.3941	93.5853
0.47667	92.5369	86.3112	93.2769
0.47708	91.6807	86.1753	93.1058
0.4775	91.5331	86.4116	93.1746
0.47792	92.0878	86.2943	93.2721
0.47833	92.8306	86.3855	93.5017
0.47875	90.5043	86.2918	93.4484
0.47917	91.059	86.3275	93.0088
0.47958	90.6992	86.4001	93.0923
0.48	91.7385	86.0938	93.3782
0.48042	91.7847	86.4018	92.9207
0.48083	92.7494	86.2542	93.0001
0.48125	91.6058	86.354	93.4101
0.48167	91.0261	86.4138	93.2681
0.48208	92.2528	86.4576	93.0937
0.4825	91.3713	86.6176	93.2169
0.48292	91.4563	86.6179	93.282
0.48333	91.391	86.6913	93.301
0.48375	92.452	86.358	93.1845
0.48417	91.6507	86.5703	93.0416
0.48458	91.4085	86.4874	93.1042
0.485	91.7164	86.6379	92.9981
0.48542	92.1959	86.29	93.2505
0.48583	92.7454	86.5921	93.1973
0.48625	91.0022	86.708	93.176
0.48667	91.3509	86.8208	92.9459
0.48708	91.6881	86.7349	93.1877
0.4875	92.3721	86.725	93.1496
0.48792	92.0272	86.595	93.088
0.48833	92.1344	86.6946	93.3498
0.48875	91.456	86.6777	93.0507
0.48917	92.5458	87.0179	93.056
0.48958	91.0365	86.8786	93.1237
0.49	90.5008	86.7785	92.6762
0.49042	90.9043	86.8526	93.0551
0.49083	91.8326	86.9324	93.2124
0.49125	91.8575	87.0409	93.2081
0.49167	91.8901	86.7224	93.0023
0.49208	91.9542	86.9362	93.1506
0.4925	91.5975	86.6749	93.3157
0.49292	91.4809	86.8391	93.2013
0.49333	92.2485	87.0184	93.1688
0.49375	91.5534	86.861	93.1373
0.49417	92.7501	86.9502	93.4058
0.49458	91.265	86.9724	92.9787
0.495	90.6113	87.113	93.0757
0.49542	91.417	87.1858	93.1846
0.49583	91.4112	87.0334	93.0607
0.49625	90.8649	86.9075	93.2922
0.49667	91.6784	86.9649	93.1003
0.49708	91.3342	86.7791	93.2274
0.4975	91.7385	87.0468	93.1111
0.49792	91.1268	86.9566	93.0569
0.49833	90.7851	86.9357	93.2794
0.49875	90.9482	87.0387	93.0305
0.49917	91.2383	87.1474	93.2738
0.49958	91.7075	87.2767	93.4087
0.5	91.2686	87.3255	93.3429
0.50042	91.8859	87.2562	93.222
0.50083	92.0329	87.1468	93.4406
0.50125	91.787	87.3044	93.387
0.50167	91.6306	87.1837	93.2569
0.50208	91.3572	87.3596	93.2184
0.5025	91.4079	87.3277	93.3004
0.50292	91.9759	87.5532	93.2687
0.50333	91.4214	87.2402	93.2725
0.50375	90.3709	87.2808	93.225
0.50417	89.6976	87.7785	93.2295
0.50458	89.6988	87.3179	93.1581
0.505	90.9866	87.4782	93.1836
0.50542	91.5882	87.464	93.0518
0.50583	91.0896	87.5052	93.1353
0.50625	90.7464	87.2701	93.2652
0.50667	91.7171	87.467	93.3581
0.50708	91.0635	87.5243	93.3007
0.5075	90.3277	87.6169	93.3324
0.50792	91.1419	87.6647	93.4947
0.50833	91.156	87.6921	93.5065
0.50875	92.5866	87.4369	93.3898
0.50917	91.5105	87.5297	93.1082
0.50958	89.8899	87.6753	93.1816
0.51	90.0919	87.4881	93.1795
0.51042	90.7592	87.4242	93.2672
0.51083	91.0887	87.5466	93.0805
0.51125	91.6184	87.9464	93.5507
0.51167	91.4338	87.7786	93.2098
0.51208	90.5472	87.8086	93.2495
0.5125	90.6698	87.8211	93.0477
0.51292	91.6225	87.7197	93.2631
0.51333	91.6035	87.9663	93.5519
0.51375	90.4806	87.9774	93.4469
0.51417	91.1284	87.9537	93.3924
0.51458	90.928	88.056	93.3634
0.515	90.8415	87.6503	93.4472
0.51542	90.9424	87.8776	93.3205
0.51583	91.1588	87.9634	93.3413
0.51625	91.3187	88.1127	93.4754
0.51667	90.6686	88.0109	93.4486
0.51708	90.2337	88.2838	93.4773
0.5175	91.4823	87.9009	93.6448
0.51792	90.7513	87.905	93.4729
0.51833	92.1272	88.0347	93.5883
0.51875	90.4098	87.945	93.3391
0.51917	91.1509	87.9113	93.4115
0.51958	91.2939	88.0267	93.5977
0.52	91.2625	88.1328	93.5139
0.52042	90.4712	88.1543	93.6931
0.52083	90.8291	88.1445	93.0668
0.52125	92.0018	88.0881	93.4063
0.52167	90.961	88.2572	93.4738
0.52208	90.0042	88.219	93.6293
0.5225	90.4388	88.4291	93.3396
0.52292	90.3646	88.146	93.3776
0.52333	90.7998	88.1447	93.4399
0.52375	92.1534	88.3704	93.3938
0.52417	91.0183	88.4507	93.5946
0.52458	89.8269	88.1326	93.2994
0.525	90.3115	88.2526	93.7464
0.52542	90.8295	88.4246	93.4788
0.52583	91.2358	88.5116	93.648
0.52625	90.7055	88.4413	93.5979
0.52667	89.9834	88.5902	93.5903
0.52708	89.9947	88.4373	93.7077
0.5275	90.3441	88.4756	93.6569
0.52792	90.7189	88.4042	93.7013
0.52833	90.324	88.6093	93.5942
0.52875	90.1195	88.5724	93.5415
0.52917	90.5575	88.5893	93.5425
0.52958	90.5285	88.4138	93.9273
0.53	90.607	88.6074	93.6712
0.53042	91.1276	88.5018	93.3683
0.53083	90.5889	88.4681	93.4081
0.53125	90.431	88.6565	93.4179
0.53167	90.8868	88.4906	93.6272
0.53208	90.4338	88.5683	93.5924
0.5325	90.3801	88.5872	93.7971
0.53292	90.2678	88.8102	93.5581
0.53333	91.2998	88.7234	93.5585
0.53375	91.1227	88.9158	93.7851
0.53417	88.9836	88.7536	93.6778
0.53458	90.5879	88.7909	93.7906
0.535	90.6884	88.6991	93.7728
0.53542	90.7334	88.7746	93.8497
0.53583	91.0428	89.0028	93.7229
0.53625	90.7536	88.9602	93.8266
0.53667	90.5033	88.8805	93.6741
0.53708	89.8336	88.7609	93.4108
0.5375	90.5342	88.9288	93.8061
0.53792	90.9504	88.9084	93.5684
0.53833	90.7506	88.9849	93.4705
0.53875	90.9373	88.9151	93.76
0.53917	89.3706	88.9062	93.6492
0.53958	90.3891	88.8894	93.9218
0.54	91.8466	89.1735	93.6572
0.54042	90.7253	89.1537	93.9036
0.54083	89.563	89.2046	93.7273
0.54125	91.0753	89.058	93.835
0.54167	90.7051	89.2282	93.835
0.54208	90.7042	88.9664	93.6778
0.5425	89.7733	89.1877	94.0249
0.54292	90.1413	89.1674	93.8903
0.54333	89.983	89.2524	93.6681
0.54375	90.5086	89.3024	93.9027
0.54417	90.8561	89.0602	94.0016
0.54458	91.0195	89.18	93.8378
0.545	90.8136	89.3052	93.9784
0.54542	90.2138	89.1896	93.908
0.54583	90.1948	89.4371	93.9528
0.54625	90.3336	89.314	93.9711
0.54667	90.9891	89.5635	94.0633
0.54708	90.2586	89.5567	93.8784
0.5475	90.5003	89.5715	94.0328
0.54792	90.9228	89.559	93.9986
0.54833	91.5695	89.63	94.0688
0.54875	91.1169	89.6914	93.8186
0.54917	90.7509	89.4902	93.9217
0.54958	90.1074	89.3845	94.0952
0.55	91.0407	89.5559	94.0611
0.55042	91.1131	89.4913	94.2589
0.55083	90.9933	89.746	94.0424
0.55125	91.099	89.5837	94.2395
0.55167	91.2134	89.6644	94.0491
0.55208	90.6277	89.6259	93.9507
0.5525	90.8091	89.8563	93.954
0.55292	90.9206	89.5863	94.0778
0.55333	91.0002	89.7123	94.3627
0.55375	90.7675	89.8256	94.1536
0.55417	90.7244	89.8035	94.1992
0.55458	90.7249	90.0514	94.0518
0.555	90.5981	90.0556	94.0329
0.55542	90.4394	89.8938	94.1724
0.55583	91.2619	90.0543	94.1103
0.55625	90.5251	90.0227	94.0667
0.55667	90.7655	90.0109	94.1394
0.55708	91.4978	89.9471	94.1406
0.5575	91.1296	90.0437	94.3037
0.55792	90.78	90.1109	93.9882
0.55833	90.8685	90.3755	94.2323
0.55875	90.5874	90.2335	94.1837
0.55917	90.289	90.0702	94.2329
0.55958	90.8337	90.2492	94.1582
0.56	90.116	90.2626	94.2125
0.56042	90.3057	90.1237	94.0681
0.56083	90.0448	90.3353	94.191
0.56125	90.7916	90.232	94.0329
0.56167	91.1353	90.3748	94.1418
0.56208	91.0041	90.2242	94.1278
0.5625	91.2385	90.3103	94.5868
0.56292	90.2278	90.2818	94.4762
0.56333	90.9541	90.344	94.2767
0.56375	90.8673	90.3258	94.3891
0.56417	90.9912	90.4291	94.4585
0.56458	91.343	90.4843	94.3577
0.565	90.6888	90.386	94.4691
0.56542	90.6585	90.3647	94.3009
0.56583	90.1881	90.5193	94.4478
0.56625	89.8499	90.4292	94.3574
0.56667	90.4375	90.3351	94.1763
0.56708	91.0354	90.5816	94.4694
0.5675	89.6038	90.4846	94.4364
0.56792	90.3687	90.643	94.5863
0.56833	89.5654	90.4293	94.7083
0.56875	89.5462	90.5499	94.5696
0.56917	91.2668	90.8655	94.5919
0.56958	90.551	90.6187	94.5157
0.57	90.3082	90.8832	94.5403
0.57042	91.6581	90.8296	94.5623
0.57083	90.4436	90.8787	94.519
0.57125	90.1868	91.1853	94.6267
0.57167	89.6923	90.7362	94.6954
0.57208	90.1641	91.0417	94.8487
0.5725	90.3813	91.0249	94.6134
0.57292	90.4602	91.2725	94.355
0.57333	89.5441	91.0467	94.7926
0.57375	90.8614	91.0204	94.9611
0.57417	89.9129	90.9354	94.6297
0.57458	90.5607	90.8875	94.7055
0.575	89.9572	91.2569	94.9038
0.57542	89.2543	91.1708	94.7148
0.57583	90.3789	90.9613	94.8878
0.57625	90.6493	91.0993	94.7941
0.57667	90.7181	90.9682	94.8374
0.57708	91.134	91.0481	94.7408
0.5775	89.7343	91.1762	94.7169
0.57792	90.3496	91.1208	94.6366
0.57833	90.0408	91.4964	94.8373
0.57875	89.2452	91.4413	94.9661
0.57917	89.5817	91.4203	94.9211
0.57958	89.7826	91.5173	95.1795
0.58	90.3966	91.4268	94.8627
0.58042	89.9717	91.3637	94.7426
0.58083	90.7815	91.4841	94.9835
0.58125	90.0846	91.384	94.8964
0.58167	90.2658	91.451	94.7664
0.58208	89.9921	91.4527	94.9974
0.5825	90.8322	91.6574	95.0283
0.58292	89.9714	91.4543	95.0626
0.58333	90.91	91.4615	94.9435
0.58375	91.1233	91.573	94.8015
0.58417	90.6893	91.7153	95.0448
0.58458	90.2096	91.7055	94.8775
0.585	89.9284	91.7983	95.1189
0.58542	91.2647	91.6577	95.0673
0.58583	90.7902	91.7179	95.103
0.58625	90.6182	91.4948	95.073
0.58667	89.3158	91.7061	95.1432
0.58708	89.8737	91.9167	94.8874
0.5875	90.3777	92.1247	95.0388
0.58792	90.2174	92.1823	95.3287
0.58833	89.997	92.0136	95.1299
0.58875	90.5001	92.2339	95.175
0.58917	90.227	91.7177	95.0887
0.58958	89.1509	92.1424	95.2309
0.59	89.2044	91.9539	95.1904
0.59042	90.5364	92.0845	95.3005
0.59083	90.7605	92.1497	95.2026
0.59125	90.2226	92.1625	95.4291
0.59167	90.4589	92.0717	95.3959
0.59208	90.627	92.251	95.5048
0.5925	90.4822	92.4238	95.4398
0.59292	89.7749	92.2423	95.4522
0.59333	90.5071	92.4015	95.2585
0.59375	90.3162	92.4272	95.2325
0.59417	90.1566	92.4831	95.3366
0.59458	90.5047	92.4519	95.3362
0.595	91.2088	92.538	95.2661
0.59542	90.4917	92.618	95.2649
0.59583	90.4801	92.598	95.5061
0.59625	91.2425	92.7603	95.5514
0.59667	90.3838	92.6522	95.2788
0.59708	90.8003	92.8918	95.4235
0.5975	89.7263	92.7134	95.452
0.59792	90.8509	92.8386	95.4623
0.59833	91.1984	92.9201	95.641
0.59875	90.7971	92.921	95.3602
0.59917	90.2311	92.6902	95.4403
0.59958	91.3121	92.9992	95.6205
0.6	90.5262	93.0263	95.3684
0.60042	89.7025	93.033	95.4808
0.60083	91.0582	93.1572	95.5412
0.60125	89.1304	92.9434	95.5461
0.60167	90.2852	93.5471	95.8823
0.60208	90.6659	93.3882	95.9028
0.6025	89.8994	93.3786	95.6689
0.60292	90.1177	93.108	95.7273
0.60333	91.0434	93.377	95.8111
0.60375	90.1045	93.3337	95.751
0.60417	90.8647	93.3924	95.7944
0.60458	90.9831	93.4163	95.8387
0.605	90.0407	93.2818	95.7352
0.60542	90.3999	93.4712	95.7005
0.60583	90.6958	93.4468	95.7537
0.60625	90.7101	93.5112	95.8356
0.60667	90.636	93.5935	95.6531
0.60708	90.1605	93.3349	95.847
0.6075	90.3927	93.486	95.9002
0.60792	90.8252	93.5562	95.9707
0.60833	91.3729	93.7302	95.8649
0.60875	90.8331	93.7812	96.3014
0.60917	90.6061	93.8558	96.0685
0.60958	90.18	93.6872	96.0757
0.61	91.0414	93.7758	95.9915
0.61042	90.2133	93.7034	95.844
0.61083	90.6807	94.022	95.8473
0.61125	90.79	93.8767	95.9571
0.61167	90.1423	94.0536	96.1849
0.61208	90.0236	94.014	96.3158
0.6125	91.3364	93.7659	96.2099
0.61292	90.4359	94.0232	96.1838
0.61333	90.4339	94.2739	96.3605
0.61375	91.313	94.1385	96.4385
0.61417	90.3314	94.2681	96.1055
0.61458	90.716	94.2272	96.1001
0.615	90.795	94.3025	96.5511
0.61542	90.9597	94.2062	96.1451
0.61583	90.4956	94.3844	96.2
0.61625	91.4774	94.3981	96.2672
0.61667	91.3065	94.2349	96.1891
0.61708	90.3461	94.5132	96.2569
0.6175	91.2215	94.544	96.3
0.61792	89.6833	94.4058	96.5331
0.61833	90.3426	94.4275	96.4561
0.61875	91.4905	94.7591	96.5629
0.61917	90.8086	94.5002	96.4754
0.61958	92.1267	94.8099	96.5017
0.62	90.2669	94.7847	96.5782
0.62042	90.9136	94.7248	96.4379
0.62083	91.8955	94.7458	96.4714
0.62125	89.8132	94.9383	96.5039
0.62167	91.5727	94.9112	96.8973
0.62208	91.7684	95.1268	96.5885
0.6225	90.2086	94.9801	96.6657
0.62292	91.6398	94.8631	96.9393
0.62333	90.9401	94.7732	96.8366
0.62375	90.8924	94.973	96.7967
0.62417	90.9572	94.8206	96.8593
0.62458	91.1573	95.2077	96.7737
0.625	90.5313	94.9333	96.8847
0.62542	91.0362	95.0506	96.8146
0.62583	91.5136	95.0618	96.8907
0.62625	91.5452	95.3129	96.7563
0.62667	91.1696	95.1277	96.9487
0.62708	91.6629	95.3912	96.9113
0.6275	90.6764	95.214	96.8436
0.62792	90.7259	95.5491	97.0338
0.62833	90.7367	95.4194	96.9918
0.62875	90.3522	95.406	96.9818
0.62917	90.3636	95.3964	97.1456
0.62958	91.1066	95.4359	97.0994
0.63	91.2297	95.7402	97.1307
0.63042	91.121	95.5706	97.3411
0.63083	90.7488	95.7861	97.3267
0.63125	91.044	95.8025	96.9976
0.63167	90.5308	95.7641	97.2912
0.63208	91.4777	95.6045	97.4412
0.6325	91.3225	95.8012	97.1778
0.63292	91.1461	95.9409	97.506
0.63333	91.2116	96.0214	97.2176
0.63375	91.9109	95.8777	97.4411
0.63417	91.348	96.313	97.0827
0.63458	90.6798	95.8949	97.2401
0.635	91.4074	95.9709	97.3754
0.63542	90.6125	96.0196	97.6405
0.63583	91.0491	96.1324	97.3219
0.63625	91.22	96.3831	97.4114
0.63667	90.163	96.4643	97.3288
0.63708	90.9075	96.4168	97.6928
0.6375	91.8759	96.3545	97.5436
0.63792	91.9463	96.4293	97.5709
0.63833	91.1924	96.3088	97.5969
0.63875	91.5312	96.0669	97.7514
0.63917	91.8638	96.3715	97.5301
0.63958	91.427	96.5109	97.7335
0.64	91.0142	96.4456	97.6925
0.64042	90.5464	96.4657	97.593
0.64083	90.6846	96.6793	97.6505
0.64125	91.7815	96.4861	97.9249
0.64167	90.3177	96.5648	97.9894
0.64208	90.7904	96.7088	97.87
0.6425	90.2977	96.701	97.8981
0.64292	91.2349	96.7219	98.0322
0.64333	90.961	96.8827	97.9793
0.64375	89.3221	96.901	97.8854
0.64417	91.2255	97.0249	97.9257
0.64458	91.1752	97.0568	98.1143
0.645	91.7224	96.9534	98.163
0.64542	92.1549	97.3106	98.2215
0.64583	92.5906	97.0425	98.2282
0.64625	92.104	97.2187	98.2969
0.64667	91.5223	97.2913	98.0761
0.64708	90.9074	97.3048	98.4004
0.6475	92.3519	97.1635	98.4447
0.64792	91.29	97.4119	98.2111
0.64833	91.0951	97.594	98.4071
0.64875	91.0914	97.3632	98.3901
0.64917	92.41	97.4276	98.2185
0.64958	91.827	97.4093	98.0208
0.65	91.5014	97.3488	98.3347
0.65042	93.0316	97.5486	98.5757
0.65083	91.4551	97.7003	98.3758
0.65125	91.3809	97.722	98.3061
0.65167	92.813	97.6725	98.4005
0.65208	91.1325	97.778	98.5228
0.6525	91.1905	97.8877	98.4782
0.65292	90.8332	97.8446	98.4609
0.65333	91.3163	98.0446	98.5226
0.65375	91.4482	97.8918	98.4221
0.65417	91.597	97.9529	98.6709
0.65458	91.3564	97.8136	98.5927
0.655	92.2485	97.8459	98.7016
0.65542	91.0277	98.0463	98.705
0.65583	92.4515	98.1796	98.7168
0.65625	90.6991	98.2929	98.8097
0.65667	91.7736	98.2419	98.7369
0.65708	92.2391	98.0241	98.9178
0.6575	92.4115	98.2295	98.9493
0.65792	92.5745	98.2024	98.9022
0.65833	91.6682	98.4409	98.9239
0.65875	91.0397	98.6346	98.8773
0.65917	91.9398	98.7308	98.7507
0.65958	92.0662	98.565	98.8617
0.66	91.4618	98.5611	99.1539
0.66042	91.6417	98.6454	98.9699
0.66083	91.5486	98.5793	99.2964
0.66125	91.9596	98.6755	99.0328
0.66167	91.4498	98.8061	99.2503
0.66208	91.7738	98.7701	98.9811
0.6625	91.915	98.801	99.3433
0.66292	91.9659	98.7949	99.525
0.66333	91.933	98.8031	99.268
0.66375	91.2083	98.8226	99.2614
0.66417	92.3726	98.8664	99.1819
0.66458	92.4187	99.1933	99.3751
0.665	92.0058	99.2543	99.2794
0.66542	92.2626	99.3291	99.2096
0.66583	92.58	99.2125	99.371
0.66625	91.4	99.2735	99.1891
0.66667	91.7937	99.3449	99.2819
0.66708	92.4999	99.3082	99.2344
0.6675	91.2906	99.4641	99.6191
0.66792	91.6676	99.4032	99.8227
0.66833	92.4865	99.3657	99.5444
0.66875	92.846	99.5613	99.6387
0.66917	92.588	99.4874	99.5209
0.66958	92.1122	99.5893	99.7986
0.67	91.9822	99.6491	99.8565
0.67042	91.0593	99.5245	100.029
0.67083	92.2464	99.9281	99.8697
0.67125	92.9312	99.7036	99.6814
0.67167	91.5001	99.7279	100.034
0.67208	91.7979	99.8169	99.679
0.6725	92.9468	99.7623	100.072
0.67292	91.7326	99.9779	99.8497
0.67333	92.8607	99.9039	99.9968
0.67375	91.7316	99.9711	100.02
0.67417	90.7264	100.237	100.14
0.67458	91.9916	100.249	100.096
0.675	91.9427	100.134	100.205
0.67542	92.4485	100.213	100.258
0.67583	92.0479	100.348	100.018
0.67625	91.8514	100.521	100.191
0.67667	92.0161	100.301	100.036
0.67708	91.6803	100.554	100.344
0.6775	92.7043	100.509	100.25
0.67792	92.634	100.446	100.418
0.67833	92.7431	100.563	100.529
0.67875	93.8534	100.489	100.487
0.67917	92.0196	100.499	100.485
0.67958	93.7088	100.678	100.623
0.68	91.643	100.539	100.628
0.68042	92.3523	100.94	100.539
0.68083	91.2635	100.708	100.625
0.68125	92.1578	100.758	100.655
0.68167	92.7166	101.044	100.898
0.68208	92.4475	101.04	100.637
0.6825	92.5302	101.005	100.709
0.68292	92.525	101.076	100.81
0.68333	92.5557	101.073	100.933
0.68375	92.4215	101.164	100.865
0.68417	92.9465	101.346	100.775
0.68458	92.2397	101.357	100.719
0.685	92.5677	101.35	100.921
0.68542	92.6564	101.469	100.883
0.68583	92.2603	101.52	100.804
0.68625	92.7367	101.501	100.939
0.68667	93.4621	101.193	100.999
0.68708	92.8107	101.446	101.304
0.6875	93.5394	101.638	101.111
0.68792	92.8605	101.618	101.23
0.68833	92.646	101.874	101.405
0.68875	93.4002	101.861	101.286
0.68917	91.9715	101.724	101.294
0.68958	93.2924	101.882	101.277
0.69	92.8262	101.884	101.625
0.69042	91.9945	101.788	101.221
0.69083	91.9607	102.158	101.396
0.69125	92.824	102.14	101.338
0.69167	93.32	101.935	101.532
0.69208	92.5212	101.952	101.677
0.6925	93.4092	102.023	101.454
0.69292	92.3504	102.173	101.457
0.69333	93.5084	102.27	101.772
0.69375	93.1694	102.305	101.611
0.69417	93.1961	102.224	101.58
0.69458	93.9596	102.345	101.664
0.695	92.3617	102.318	101.836
0.69542	93.3452	102.363	101.646
0.69583	92.9985	102.427	101.909
0.69625	92.6541	102.5	101.886
0.69667	92.682	102.605	101.91
0.69708	93.0871	102.739	101.979
0.6975	92.8327	103.035	102.014
0.69792	94.2963	102.888	102.198
0.69833	93.0066	102.872	102.275
0.69875	92.009	102.986	102.204
0.69917	93.1589	102.951	102.129
0.69958	92.9109	103.185	102.204
0.7	93.2787	102.941	102.244
0.70042	93.6848	103.134	102.32
0.70083	92.8615	103.179	102.243
0.70125	92.8666	103.252	102.385
0.70167	93.7599	103.51	102.282
0.70208	93.2571	103.378	102.294
0.7025	93.6922	103.441	102.388
0.70292	93.9768	103.501	102.398
0.70333	92.954	103.546	102.483
0.70375	93.2771	103.539	102.397
0.70417	94.0843	103.528	102.57
0.70458	94.1767	103.711	102.599
0.705	93.2727	103.552	102.701
0.70542	92.8147	103.718	102.677
0.70583	93.5063	103.838	102.537
0.70625	93.0942	103.805	102.62
0.70667	92.6483	103.832	102.763
0.70708	94.3122	103.981	102.814
0.7075	94.1139	104.168	102.931
0.70792	93.4014	104.223	103.03
0.70833	93.2436	104.141	102.986
0.70875	94.0839	104.283	102.985
0.70917	93.6838	104.161	102.909
0.70958	93.8543	104.268	103.106
0.71	93.6032	104.362	103.063
0.71042	93.3899	104.41	103.144
0.71083	94.2785	104.371	103.106
0.71125	93.9251	104.399	103.276
0.71167	93.8398	104.602	103.07
0.71208	93.844	104.661	103.226
0.7125	93.2776	104.786	103.311
0.71292	93.8766	104.688	103.279
0.71333	93.3299	104.639	103.7
0.71375	94.1029	104.789	103.513
0.71417	93.4803	104.777	103.59
0.71458	94.1152	104.75	103.629
0.715	94.6198	104.979	103.46
0.71542	93.6791	104.899	103.424
0.71583	94.2983	105.143	103.428
0.71625	94.4783	105.194	103.822
0.71667	95.2039	105.037	103.762
0.71708	94.3983	105.119	103.595
0.7175	94.3405	105.236	103.652
0.71792	94.5607	105.2	103.5
0.71833	95.2982	105.242	103.599
0.71875	95.1762	105.252	103.781
0.71917	94.5375	105.327	103.779
0.71958	94.2296	105.462	103.682
0.72	94.46	105.723	103.98
0.72042	94.508	105.482	104.002
0.72083	94.099	105.598	104.013
0.72125	93.7454	105.684	104.169
0.72167	94.4013	105.516	104.052
0.72208	94.6472	105.907	104.045
0.7225	93.6399	106.012	104.231
0.72292	94.517	106.032	104.119
0.72333	94.0664	106.003	104.073
0.72375	94.6295	105.96	104.361
0.72417	94.5071	106.317	104.253
0.72458	93.6	106.167	104.355
0.725	94.5379	106.066	104.326
0.72542	94.7949	106.174	104.445
0.72583	94.7726	106.492	104.554
0.72625	94.6929	106.292	104.746
0.72667	95.1336	106.184	104.619
0.72708	94.9903	106.536	104.639
0.7275	95.2016	106.569	104.688
0.72792	95.5323	106.813	104.681
0.72833	95.4205	106.451	104.735
0.72875	94.2468	106.618	104.706
0.72917	96.0018	106.651	104.902
0.72958	95.4069	106.857	104.707
0.73	93.8796	106.791	104.651
0.73042	95.1523	106.991	104.987
0.73083	94.5684	106.972	104.828
0.73125	94.4768	107.066	104.919
0.73167	95.1923	107.217	104.826
0.73208	94.8428	107.116	105.136
0.7325	95.8821	107.215	104.992
0.73292	94.6911	107.329	104.985
0.73333	94.934	107.298	105.111
0.73375	95.5229	107.464	105.012
0.73417	95.5924	107.348	105.049
0.73458	94.1667	107.389	105.288
0.735	95.6876	107.588	105.379
0.73542	95.4889	107.821	105.44
0.73583	95.3579	107.668	105.285
0.73625	95.0927	107.775	105.117
0.73667	95.9164	107.637	105.643
0.73708	95.0954	107.94	105.705
0.7375	95.8305	107.84	105.643
0.73792	94.8844	107.997	105.584
0.73833	95.3141	108.069	105.761
0.73875	94.7687	107.932	105.921
0.73917	94.9892	108.028	105.705
0.73958	95.5516	108.105	105.664
0.74	95.9514	108.217	105.611
0.74042	96.3711	108.257	105.715
0.74083	95.5564	108.274	105.819
0.74125	95.47	108.234	105.762
0.74167	95.6116	108.262	105.765
0.74208	95.0957	108.485	106.197
0.7425	96.3331	108.664	105.88
0.74292	96.6907	108.635	105.959
0.74333	95.6395	108.684	106.053
0.74375	95.3246	108.814	105.921
0.74417	95.3715	108.969	105.98
0.74458	95.6194	108.9	106.133
0.745	95.1588	108.998	106.305
0.74542	96.561	108.87	106.318
0.74583	95.4629	108.973	106.36
0.74625	96.0672	109.12	106.384
0.74667	95.3454	109.175	106.379
0.74708	95.884	109.226	106.394
0.7475	95.8988	109.314	106.402
0.74792	95.9956	109.163	106.714
0.74833	95.6256	109.238	106.86
0.74875	95.2673	109.376	106.691
0.74917	95.5057	109.401	106.673
0.74958	95.7186	109.593	106.798
0.75	95.5849	109.591	106.616
0.75042	96.3315	109.594	106.801
0.75083	96.1237	109.594	106.876
0.75125	96.1952	109.648	106.858
0.75167	96.0095	109.748	106.94
0.75208	94.4347	109.807	106.872
0.7525	97.067	109.935	106.996
0.75292	95.8418	109.928	107.192
0.75333	96.7008	109.829	107.361
0.75375	95.8581	110.114	107.39
0.75417	96.7794	110.118	107.242
0.75458	97.0595	109.997	107.128
0.755	97.0856	110.275	107.236
0.75542	96.8576	110.328	107.264
0.75583	96.4732	110.204	107.246
0.75625	95.9381	110.381	107.096
0.75667	96.1299	110.49	107.487
0.75708	96.386	110.57	107.448
0.7575	96.462	110.601	107.575
0.75792	96.4309	110.667	107.631
0.75833	96.8831	110.747	107.464
0.75875	96.0221	110.907	107.619
0.75917	95.7648	110.826	107.866
0.75958	96.8807	110.909	107.616
0.76	96.8912	110.817	107.782
0.76042	97.1514	110.87	107.728
0.76083	96.964	110.925	107.675
0.76125	97.1867	110.859	107.811
0.76167	96.7239	111.333	107.959
0.76208	95.7248	111.113	108.074
0.7625	96.8033	111.167	107.915
0.76292	97.0074	111.355	108.222
0.76333	96.3129	111.47	108.151
0.76375	96.6941	111.43	108.129
0.76417	97.6278	111.634	108.075
0.76458	97.2841	111.577	108.361
0.765	95.8925	111.666	108.386
0.76542	96.8887	111.616	107.95
0.76583	96.3163	111.799	108.475
0.76625	97.1719	111.983	108.451
0.76667	97.1513	111.838	108.786
0.76708	95.7347	112.114	108.629
0.7675	96.2388	112.08	108.378
0.76792	96.8063	112.167	108.383
0.76833	96.4211	112.003	108.626
0.76875	96.5719	112.243	108.635
0.76917	96.7356	112.34	108.702
0.76958	98.0096	112.358	108.747
0.77	97.158	112.27	108.778
0.77042	97.1664	112.53	108.755
0.77083	96.1754	112.39	108.923
0.77125	97.3952	112.487	108.918
0.77167	98.4311	112.616	108.911
0.77208	98.1799	112.76	108.847
0.7725	97.8866	112.793	109.074
0.77292	96.8992	112.698	109.078
0.77333	97.5301	112.995	109.131
0.77375	97.8794	112.893	108.934
0.77417	97.7942	112.917	109.422
0.77458	98.1839	112.978	109.129
0.775	97.7742	113.042	109.352
0.77542	97.3743	113.116	109.332
0.77583	97.4932	113.082	109.241
0.77625	98.161	113.239	109.461
0.77667	97.2012	113.382	109.473
0.77708	96.9485	113.187	109.772
0.7775	98.1173	113.394	109.611
0.77792	98.5736	113.578	109.639
0.77833	97.6409	113.53	109.865
0.77875	97.4246	113.675	109.733
0.77917	97.3419	113.681	109.923
0.77958	97.9524	113.787	109.756
0.78	97.9201	113.82	109.663
0.78042	98.3727	113.961	109.899
0.78083	97.5986	113.766	109.937
0.78125	97.6728	113.946	109.863
0.78167	98.0465	114.173	109.909
0.78208	97.4175	114.144	110.062
0.7825	98.3652	114.041	110.04
0.78292	98.2353	114.172	109.886
0.78333	98.8849	114.38	110.157
0.78375	97.7897	114.295	110.002
0.78417	98.1568	114.223	110.196
0.78458	98.1909	114.357	110.255
0.785	97.9534	114.559	110.471
0.78542	98.9566	114.802	110.515
0.78583	97.5818	114.535	110.333
0.78625	98.35	114.66	110.401
0.78667	98.1604	114.811	110.568
0.78708	98.36	114.877	110.293
0.7875	98.2035	114.888	110.454
0.78792	98.5075	114.867	110.611
0.78833	99.4592	115.003	110.652
0.78875	99.0245	115.208	110.7
0.78917	98.0396	115.252	110.739
0.78958	99.262	115.094	110.557
0.79	98.2053	115.288	110.846
0.79042	98.4731	115.328	110.788
0.79083	98.6679	115.411	110.793
0.79125	98.9613	115.35	110.934
0.79167	99.31	115.403	110.777
0.79208	98.2896	115.718	111.268
0.7925	98.371	115.43	111.3
0.79292	98.8704	115.732	111.176
0.79333	98.5848	115.857	111.233
0.79375	98.7392	115.773	111.148
0.79417	98.8525	115.897	111.259
0.79458	98.2642	115.934	111.398
0.795	99.4312	116.154	111.377
0.79542	98.6617	116.143	111.531
0.79583	99.2634	115.993	111.433
0.79625	98.9327	116.197	111.492
0.79667	98.6099	116.246	111.49
0.79708	98.6234	116.409	111.678
0.7975	99.164	116.366	111.602
0.79792	98.4993	116.354	111.622
0.79833	100.021	116.381	111.406
0.79875	99.0642	116.582	111.903
0.79917	99.1128	116.607	111.834
0.79958	99.2378	116.753	111.731
0.8	99.1458	116.688	111.896
0.80042	98.6453	116.793	112.246
0.80083	99.059	116.81	112.039
0.80125	99.2848	116.845	111.972
0.80167	99.9621	117.052	112.128
0.80208	99.4721	117.099	112.145
0.8025	99.3811	117.17	112.166
0.80292	100.022	117.203	112.344
0.80333	99.1946	117.208	112.349
0.80375	98.9919	117.328	112.389
0.80417	99.6584	117.362	112.386
0.80458	99.6423	117.464	112.504
0.805	98.4556	117.557	112.68
0.80542	100.052	117.569	112.526
0.80583	99.1821	117.472	112.56
0.80625	99.919	117.6	112.47
0.80667	99.6274	117.572	112.554
0.80708	100.206	117.74	112.535
0.8075	99.4185	117.876	112.642
0.80792	100.466	118.03	112.956
0.80833	100.611	117.996	112.804
0.80875	99.6566	118.168	112.779
0.80917	99.7727	118.403	112.892
0.80958	100.603	118.162	112.973
0.81	99.7374	118.266	113.091
0.81042	99.7592	118.333	113.094
0.81083	99.483	118.239	113.101
0.81125	101.185	118.465	113.145
0.81167	99.9432	118.514	113.171
0.81208	99.553	118.542	113.122
0.8125	100.743	118.577	113.321
0.81292	99.8618	118.68	113.257
0.81333	99.7527	118.563	113.415
0.81375	100.813	118.817	113.432
0.81417	100.028	118.675	113.434
0.81458	100.303	118.929	113.467
0.815	100.445	119.003	113.625
0.81542	100.117	118.999	113.498
0.81583	101.027	119.108	113.499
0.81625	100.213	119.124	113.568
0.81667	101.218	119.22	113.555
0.81708	100.661	119.169	113.603
0.8175	100.423	119.297	113.761
0.81792	99.7676	119.409	113.939
0.81833	100.383	119.456	113.831
0.81875	100.641	119.443	113.855
0.81917	100.139	119.678	114.085
0.81958	101.053	119.604	114.161
0.82	99.9713	119.697	113.951
0.82042	101.622	119.858	113.897
0.82083	99.9541	119.747	114.062
0.82125	101.634	119.977	114.124
0.82167	100.378	119.916	114.14
0.82208	100.582	119.9	114.348
0.8225	100.95	120.17	114.46
0.82292	100.614	120.266	114.456
0.82333	100.951	120.209	114.399
0.82375	100.89	120.294	114.526
0.82417	100.715	120.45	114.536
0.82458	100.766	120.494	114.436
0.825	101.943	120.459	114.517
0.82542	101.253	120.496	114.575
0.82583	100.786	120.639	114.602
0.82625	100.93	120.693	114.79
0.82667	101.885	120.772	114.719
0.82708	102.22	120.956	114.801
0.8275	101.012	120.944	114.872
0.82792	101.269	121.03	115.111
0.82833	101.284	121.126	115.018
0.82875	101.796	121.059	115.215
0.82917	102.289	121.16	114.961
0.82958	101.599	121.045	115.066
0.83	101.759	121.179	115.08
0.83042	103.11	121.174	115.093
0.83083	102.856	121.262	115.177
0.83125	101.178	121.552	115.437
0.83167	101.55	121.49	115.385
0.83208	101.589	121.629	115.33
[truncated: 23,498 more rows]

## Sheet: Panel D flavin addition
Current production by L. plantarum after the addition of flavin to the bioreactors.
Time (days)	uA/cm2	uA/cm2	uA/cm2			uA/cm2	uA/cm2	uA/cm2
0	27.3622	19.7705	1.43532	CDM no riboflavin		7.11996	28.9145	23.344	CDM with riboflavin
0.000416667	16.9437	8.02963	1.38837			3.04252	18.2598	14.5078
0.000833333	13.3654	7.29305	1.47852			2.85322	10.5301	11.9545
0.00125	12.4873	7.04596	1.42057			2.74258	9.26974	11.6796
0.00166667	13.0359	6.77225	1.41111			2.68383	8.85134	11.0405
0.00208333	9.96557	6.37243	1.41593			2.64445	8.54432	10.972
0.0025	9.61428	6.35414	1.41487			2.59105	8.36039	10.7446
0.00291667	11.4983	6.49315	1.42036			2.54108	8.18466	10.6801
0.00333333	12.8224	3.44912	1.32625			2.52007	8.15925	10.4332
0.00375	9.98842	3.21729	1.36592			2.5308	8.14756	10.4558
0.00416667	9.47318	3.20957	1.42036			2.50699	8.04737	10.5345
0.00458333	9.36341	3.08209	1.4078			2.50232	7.76871	10.4607
0.005	9.13994	3.0773	1.4019			2.45448	7.87189	10.1875
0.00541667	9.09459	3.09376	1.45544			2.43527	7.666	10.3384
0.00583333	8.98494	3.01314	1.42966			2.42511	7.67935	10.2277
0.00625	8.79324	2.94122	1.41644			2.38498	7.82601	9.72166
0.00666667	8.71794	2.90567	1.43992			2.40007	7.71603	9.56601
0.00708333	8.58839	2.84068	1.38234			2.39797	7.61355	9.60435
0.0075	8.57778	2.74484	1.4095			2.3664	7.48056	9.36266
0.00791667	8.43277	2.80329	1.35902			2.34777	7.33984	9.6196
0.00833333	8.29138	2.7729	1.34641			2.34685	7.32329	9.75724
0.00875	8.18095	2.77238	1.38831			2.29914	7.25863	9.47641
0.00916667	8.15416	2.73284	1.39306			2.30991	7.1532	9.46017
0.00958333	8.15096	2.71519	1.42787			2.39914	7.67471	10.0733
0.01	7.99147	2.663	1.47096			2.5225	7.77025	10.7639
0.0104167	7.91686	2.59867	1.53463			2.52697	7.75632	11.0363
0.0108333	7.8486	2.58388	1.65908			2.5212	7.62527	8.521
0.01125	7.76171	2.57912	1.57996			2.51305	7.4188	9.90792
0.0116667	7.67597	2.53512	1.63469			2.4516	7.31551	11.2497
0.0120833	7.62021	2.50066	1.62608			2.43172	7.2208	7.95597
0.0125	7.59727	2.51522	1.59221			2.43607	7.24409	9.99843
0.0129167	7.62992	2.50226	1.68855			2.45303	7.10583	8.69686
0.0133333	7.50163	2.48445	1.69353			2.39763	7.17837	9.35047
0.01375	7.44233	2.49438	1.74526			2.35145	7.11949	9.28038
0.0141667	7.34759	2.48644	1.68856			2.37839	6.99631	8.76531
0.0145833	7.37296	2.49012	1.62339			2.34679	6.98671	11.3774
0.015	7.2894	2.38775	1.71958			2.34786	6.89852	10.0688
0.0154167	7.19077	2.27822	1.77468			2.32616	6.82709	9.97784
0.0158333	7.1294	2.33891	1.7493			2.27423	6.74948	9.66848
0.01625	7.02634	2.34488	1.88411			2.2747	6.72904	9.71456
0.0166667	7.08442	2.39549	1.87676			2.27915	6.72148	9.48744
0.0170833	7.04123	2.31572	1.89531			2.26945	6.64823	9.34859
0.0175	6.91768	2.28226	1.90705			2.26125	6.56974	9.23464
0.0179167	6.88722	2.33087	1.83535			2.26074	6.54629	9.20087
0.0183333	6.89412	2.31726	1.88567			2.28629	6.4168	8.96574
0.01875	6.70883	2.3127	1.93999			2.25599	6.48184	8.95484
0.0191667	6.65148	2.36344	1.94461			2.23485	6.38495	8.96046
0.0195833	6.60581	2.26971	1.95137			2.1999	6.29692	8.76298
0.02	6.56986	2.26545	1.87548			2.17659	6.36781	8.58479
0.0204167	6.57991	2.29053	1.92837			2.17633	6.23528	8.56514
0.0208333	6.45211	2.23647	1.84851			2.17035	6.21796	8.47372
0.02125	6.32529	2.19932	1.8897			2.16772	6.18659	8.4336
0.0216667	6.39238	2.17493	1.89665			2.16868	6.12887	8.43934
0.0220833	6.36126	2.08913	1.94253			2.15154	5.952	8.2424
0.0225	6.32238	1.97601	1.84102			2.13193	6.0324	8.14191
0.0229167	6.28173	2.00757	1.76777			2.14528	5.9641	8.08354
0.0233333	6.23278	1.97043	1.81987			2.11841	5.98886	8.13595
0.02375	6.20438	1.97392	1.81071			2.08368	5.91113	7.89452
0.0241667	6.09573	1.9746	1.83666			2.13822	5.84492	7.91861
0.0245833	6.05156	1.91055	1.75926			2.09943	5.84095	7.69844
0.025	6.02751	1.98635	1.85714			2.12372	5.82387	7.73176
0.0254167	5.90889	2.01469	1.88102			2.07469	5.77112	7.71735
0.0258333	5.9326	2.05592	1.77924			2.07704	5.67679	7.60081
0.02625	5.91068	2.00319	1.88379			2.03914	5.67898	7.54086
0.0266667	5.8339	1.95554	1.85354			2.0359	5.65449	7.46262
0.0270833	5.72422	1.96401	1.80126			2.02519	5.57226	7.36543
0.0275	5.75841	1.89503	1.82724			2.02044	5.5249	7.32617
0.0279167	5.6667	1.9009	1.84096			2.00414	5.54211	7.18067
0.0283333	5.6396	1.91936	1.9326			2.02929	5.43728	7.21195
0.02875	5.59381	1.90345	1.77444			2.00712	5.4282	7.11777
0.0291667	5.48672	1.89117	1.83616			1.97651	5.37433	7.06012
0.0295833	5.46372	1.86785	1.72471			1.98025	5.33774	7.02747
0.03	5.42715	1.86052	1.83648			1.9793	5.34158	6.92557
0.0304167	5.41153	1.91057	1.71456			1.93302	5.32848	6.89259
0.0308333	5.46368	1.93326	1.87644			1.94225	5.23088	6.85567
0.03125	5.3972	1.88596	1.87585			1.93165	5.19653	6.90929
0.0316667	5.28203	1.85114	1.81131			1.91846	5.15172	6.88925
0.0320833	5.20433	1.84743	1.81831			1.92483	5.1872	6.73167
0.0325	5.18562	1.74717	1.79998			1.90983	5.12419	6.65262
0.0329167	5.15409	1.76816	1.83872			1.87773	5.0698	6.62131
0.0333333	5.13791	1.76177	1.90699			1.90055	4.97621	6.45334
0.03375	5.1405	1.76609	1.87855			1.91068	4.94993	6.51933
0.0341667	5.09642	1.6683	1.87314			1.88676	4.96783	6.39502
0.0345833	5.04724	1.59812	1.80883			1.87438	4.89141	6.30553
0.035	5.04383	1.67301	1.82355			1.86041	4.86723	6.26635
0.0354167	4.97259	1.73053	1.86842			1.82429	4.80366	6.24236
0.0358333	4.89542	1.68356	1.8316			1.83024	4.76436	6.19885
0.03625	4.86971	1.70854	2.01921			1.81558	4.78868	6.08041
0.0366667	4.87512	1.61689	1.91771			1.85877	4.73228	6.13518
0.0370833	4.84066	1.60913	1.97476			1.82525	4.62589	6.01742
0.0375	4.81028	1.54843	1.97816			1.82544	4.62841	5.97934
0.0379167	4.72418	1.56566	1.95748			1.79368	4.56885	5.81087
0.0383333	4.73313	1.54079	2.02193			1.7666	4.54844	5.83166
0.03875	4.66123	1.5096	2.06016			1.80172	4.49747	5.79691
0.0391667	4.63389	1.5561	2.03217			1.7852	4.48374	5.6831
0.0395833	4.54747	1.57239	2.11733			1.77599	4.43623	5.67668
0.04	4.52666	1.56094	2.14255			1.75727	4.42326	5.62071
0.0404167	4.52054	1.48855	2.17273			1.75313	4.39508	5.54202
0.0408333	4.48543	1.55613	2.0705			1.71036	4.34638	5.52502
0.04125	4.45332	1.55938	2.19087			1.72287	4.35851	5.42541
0.0416667	4.39827	1.61377	2.20986			1.72073	4.34767	5.29693
0.0420833	4.35732	1.65658	2.22395			1.69525	4.3252	5.34163
0.0425	4.35491	1.57655	2.34403			1.70432	4.22992	5.34381
0.0429167	4.30596	1.53592	2.20167			1.67274	4.21876	5.30733
0.0433333	4.25929	1.55525	2.22321			1.65333	4.16331	5.26264
0.04375	4.26265	1.46683	2.1814			1.67636	4.14137	5.0895
0.0441667	4.23378	1.54808	2.17587			1.67475	4.16623	5.05646
0.0445833	4.23618	1.44155	2.31848			1.66639	4.04885	4.97244
0.045	4.12659	1.50783	2.20947			1.67044	4.03101	4.95711
0.0454167	4.18572	1.42797	2.2325			1.67264	4.03342	4.86411
0.0458333	4.17727	1.42494	2.20037			1.6584	3.96161	5.07093
0.04625	4.09242	1.45781	2.21886			1.61543	3.97333	4.95616
0.0466667	4.06332	1.48916	2.15187			1.59717	3.93603	4.93385
0.0470833	4.01134	1.46618	2.14227			1.60818	3.84071	4.82779
0.0475	4.0605	1.39044	2.10697			1.62315	3.83651	4.73108
0.0479167	4.06342	1.42491	2.11951			1.59307	3.79415	4.71623
0.0483333	3.98838	1.4587	2.10632			1.5876	3.79976	4.61082
0.04875	3.9541	1.4815	2.08704			1.58219	3.77191	4.35869
0.0491667	3.90857	1.37435	2.14483			1.56187	3.73582	4.8571
0.0495833	3.89139	1.45525	2.10103			1.56179	3.70636	4.65767
0.05	3.85552	1.38153	2.10788			1.56872	3.72333	4.58616
0.0504167	3.85225	1.40667	2.22797			1.55214	3.66169	4.5537
0.0508333	3.85705	1.40363	2.11979			1.55579	3.60902	4.47347
0.05125	3.80927	1.42202	2.13313			1.54404	3.59438	4.37954
0.0516667	3.79054	1.33723	2.18591			1.51686	3.55115	4.36772
0.0520833	3.73615	1.33612	2.1554			1.53716	3.54369	4.40329
0.0525	3.72597	1.36519	2.0265			1.52002	3.55374	4.33412
0.0529167	3.65816	1.34589	2.11966			1.50866	3.49282	4.23473
0.0533333	3.67417	1.32454	2.04885			1.50271	3.4835	4.20892
0.05375	3.65172	1.39616	2.03041			1.49913	3.44378	4.16935
0.0541667	3.59864	1.30544	2.08062			1.4857	3.40951	4.1092
0.0545833	3.60518	1.30984	2.05544			1.48732	3.36403	4.09526
0.055	3.55671	1.27067	2.13489			1.48785	3.39053	4.03332
0.0554167	3.51515	1.25623	2.12032			1.46861	3.35335	3.94992
0.0558333	3.50579	1.2127	2.13809			1.46692	3.30938	3.91509
0.05625	3.49947	1.20845	2.26775			1.47873	3.30862	3.91312
0.0566667	3.44883	1.27062	2.11441			1.45404	3.27104	3.72745
0.0570833	3.41548	1.20972	2.16799			1.45064	3.21884	3.80047
0.0575	3.43396	1.26744	2.21324			1.42061	3.1593	3.81187
0.0579167	3.38657	1.21625	2.11336			1.40664	3.17965	3.76553
0.0583333	3.37802	1.20292	2.20071			1.4294	3.19347	3.72573
0.05875	3.3634	1.21734	2.17173			1.40269	3.14959	3.67619
0.0591667	3.29859	1.11969	2.17187			1.40523	3.10755	3.757
0.0595833	3.30485	1.1922	2.1771			1.39049	3.07254	3.67944
0.06	3.29277	1.14326	2.18723			1.39889	3.08081	3.64358
0.0604167	3.25452	1.14469	2.19572			1.37335	3.05347	3.56448
0.0608333	3.21317	1.14149	2.15072			1.36741	3.01689	3.51018
0.06125	3.19621	1.08642	2.17232			1.37681	3.01322	3.50587
0.0616667	3.17735	1.1141	2.19714			1.37894	3.00065	3.45028
0.0620833	3.14897	1.10638	2.18992			1.36501	2.95311	3.4327
0.0625	3.16101	1.13538	2.12634			1.34794	2.91703	3.41679
0.0629167	3.37285	1.14792	2.13408			1.33875	2.88608	3.40145
0.0633333	3.35884	1.12013	2.09777			1.34143	2.86411	3.35401
0.06375	3.58413	1.1279	2.17429			1.33747	2.83828	3.31671
0.0641667	3.41864	1.19365	2.22415			1.32695	2.79656	3.28803
0.0645833	4.73301	1.09007	2.1502			1.3202	2.77075	3.27562
0.065	3.38657	0.91024	2.20398			1.31742	2.77737	3.26166
0.0654167	3.57489	0.989585	2.32496			1.30964	2.7326	3.3731
0.0658333	3.6014	1.05656	2.30218			1.29959	2.73679	3.27662
0.06625	3.53644	1.02382	2.45097			1.29915	2.76011	3.16431
0.0666667	3.50276	0.952909	2.35075			1.304	2.72038	3.13073
0.0670833	3.52468	0.957923	2.34022			1.29328	2.68854	3.11023
0.0675	3.45768	0.97704	2.41355			1.25765	2.67663	3.12131
0.0679167	3.48514	0.986662	2.48047			1.2634	2.60169	3.00692
0.0683333	3.4354	0.940318	2.55349			1.2567	2.62484	2.8883
0.06875	3.47995	0.889316	2.43071			1.2493	2.57469	2.91558
0.0691667	3.36655	0.952184	2.39859			1.22935	2.52783	2.91418
0.0695833	3.34369	0.938298	2.51498			1.24675	2.51972	2.93228
0.07	3.32085	0.910695	2.47218			1.2429	2.53189	2.89904
0.0704167	3.23144	0.870439	2.58476			1.22151	2.53319	2.94999
0.0708333	3.24201	0.834742	2.53835			1.21809	2.49335	2.98946
0.07125	3.20834	0.896111	2.52561			1.21692	2.44662	2.92071
0.0716667	3.16679	0.894586	2.62161			1.1908	2.4133	2.81062
0.0720833	3.17008	0.936338	2.63755			1.20876	2.42918	2.79992
0.0725	3.13134	0.913618	2.63287			1.1956	2.3996	2.76253
0.0729167	3.09737	0.872074	2.56329			1.19253	2.40174	2.7418
0.0733333	3.07817	0.893256	2.47425			1.19679	2.38342	2.70063
0.07375	3.08873	0.817185	2.58221			1.18376	2.33827	2.69302
0.0741667	3.04657	0.842368	2.63737			1.16414	2.32425	2.69562
0.0745833	2.98045	0.833601	2.51183			1.16202	2.29711	2.70012
0.075	2.9031	0.867941	2.60847			1.15099	2.305	2.62942
0.0754167	2.92382	0.813792	2.48862			1.14622	2.28093	2.59195
0.0758333	3.45473	0.8349	2.55751			1.13873	2.26111	2.55874
0.07625	3.59415	1.65675	2.46767			1.12956	2.23461	2.59017
0.0766667	2.60521	1.27819	2.51917			1.12618	2.22784	2.53982
0.0770833	2.24975	0.995381	2.45623			1.11885	2.19726	2.4802
0.0775	2.23506	0.974371	2.53271			1.12931	2.17504	2.45918
0.0779167	2.33715	0.972555	2.48566			1.11387	2.17069	2.417
0.0783333	2.54193	1.12054	2.53558			1.11432	2.14485	2.36022
0.07875	2.7205	1.21727	2.55884			1.10846	2.10952	2.28262
0.0791667	2.93983	1.32287	2.57274			1.09653	2.09659	2.32747
0.0795833	3.11457	1.46421	2.49492			1.09657	2.08274	2.50778
0.08	3.37385	1.63298	2.53658			1.08406	2.06056	2.34563
0.0804167	3.53412	1.63807	2.52821			1.0814	2.04882	2.31839
0.0808333	3.6299	1.68666	2.54772			1.0743	1.98995	2.29611
0.08125	3.75959	1.87206	2.60508			1.06848	1.9931	2.24172
0.0816667	3.84736	1.91732	2.59676			1.06108	1.99058	2.22084
0.0820833	3.98005	2.01483	2.61785			1.05631	1.97156	2.21917
0.0825	4.07921	2.14283	2.54853			1.05607	1.93755	2.16663
0.0829167	4.13351	2.15942	2.62012			1.05379	1.95129	2.1372
0.0833333	4.27637	2.35765	2.57808			1.04386	1.93741	2.00117
0.08375	4.41646	2.45999	2.58097			1.02447	1.91775	2.05117
0.0841667	4.50377	2.62221	2.61785			1.01872	1.89345	2.18349
0.0845833	4.56793	2.64721	2.66377			1.02663	1.88119	2.1315
0.085	4.7407	2.66611	2.57847			1.02095	1.88175	2.05865
0.0854167	4.80435	2.63439	2.58023			1.00561	1.88083	2.0439
0.0858333	4.89248	2.70884	2.64678			1.00306	1.82936	2.02227
0.08625	5.02874	2.87839	2.67069			1.02601	1.79639	1.92751
0.0866667	5.10027	2.87187	2.64378			1.00095	1.79212	1.8625
0.0870833	5.24354	3.03441	-2.3544			1.00623	1.79991	1.96158
0.0875	5.31213	3.09181	2.6368			0.99606	1.7881	1.92471
0.0879167	5.38442	3.23479	2.57092			0.98774	1.77802	1.88616
0.0883333	5.4796	3.35072	2.38847			0.98254	1.76494	1.87789
0.08875	5.62265	3.44347	2.37996			0.98038	1.76729	1.88487
0.0891667	5.74319	3.39084	2.38371			0.95385	1.71597	1.88348
0.0895833	5.92917	3.56034	2.42246			1.61645	1.91645	2.23825
0.09	6.0455	3.5446	2.40669			1.1778	1.70805	1.95858
0.0904167	6.13472	3.57139	2.38747			1.05773	1.54361	1.78672
0.0908333	6.24401	3.76405	2.47245			1.05163	1.4889	1.76132
0.09125	6.28469	3.83825	2.52852			1.08223	1.5238	1.76389
0.0916667	6.39711	3.99192	2.57627			1.13879	1.64998	1.97307
0.0920833	6.4837	4.27097	2.62212			1.22048	1.81225	2.139
0.0925	6.65156	4.32006	2.65726			1.2912	1.95119	2.22845
0.0929167	6.7041	4.34056	2.70181			1.34443	2.1164	2.26988
0.0933333	6.69085	4.3621	2.7118			1.3884	2.32704	1.77112
0.09375	6.81266	4.39508	2.72973			1.46129	2.42357	2.25396
0.0941667	6.92101	4.55605	2.71751			1.50355	2.53384	2.39424
0.0945833	6.98314	4.75611	2.78382			1.53312	2.6242	2.24449
0.095	7.13138	4.79802	2.88712			1.59798	2.73845	3.16501
0.0954167	7.35434	4.98088	2.90558			1.66458	2.88703	3.02414
0.0958333	7.3573	4.97421	2.88633			1.71596	3.03904	2.92681
0.09625	7.47008	5.01715	2.8672			1.75946	3.11351	2.76903
0.0966667	7.66095	5.19521	2.90616			1.82129	3.26199	3.00042
0.0970833	7.74768	5.38909	2.88756			1.84865	3.32104	3.21896
0.0975	7.85635	5.19403	2.89868			1.90407	3.45812	3.37486
0.0979167	7.88235	5.36881	2.92674			1.93832	3.61663	3.76577
0.0983333	8.01777	5.33562	2.95892			1.99257	3.76767	3.4306
0.09875	8.07217	5.5411	2.96429			2.05165	3.83412	3.70242
0.0991667	8.08222	5.43564	2.97214			2.08832	4.01335	3.7583
0.0995833	8.18842	5.62066	2.90054			2.13994	4.14564	4.05054
0.1	8.4086	5.78702	2.97393			2.23744	4.26495	4.11784
0.100417	8.40185	6.24828	2.93016			2.29614	4.33602	4.16535
0.100833	8.47003	6.25415	2.94857			2.30597	4.44749	4.23558
0.10125	8.70132	5.9075	2.89275			2.36149	4.68577	4.52903
0.101667	8.9025	6.0287	2.87911			2.43232	4.79585	4.61461
0.102083	8.92023	6.14675	2.79309			2.48616	4.94796	4.66734
0.1025	8.91846	6.49382	2.87772			2.53507	5.12989	4.75358
0.102917	9.0303	6.48817	2.90718			2.58775	5.29118	4.60875
0.103333	9.24271	6.54515	2.88147			2.6421	5.41673	5.03698
0.10375	9.15057	6.75329	2.89486			2.70629	5.50755	5.33133
0.104167	9.24204	6.74127	2.93397			2.78667	5.51513	5.32262
0.104583	9.4518	6.98534	2.92005			2.84903	5.52631	5.42231
0.105	9.60696	7.04752	2.91644			2.89247	5.59646	5.47214
0.105417	9.66958	6.95968	2.91888			2.93713	5.95519	5.62389
0.105833	9.87513	7.06982	2.9289			3.02188	6.18145	5.34665
0.10625	9.9504	7.10323	2.90593			3.10952	6.32789	5.35077
0.106667	9.83252	7.39053	2.80293			3.14577	6.36514	5.77899
0.107083	10.1202	7.26371	2.90315			3.19776	6.63869	5.94275
0.1075	10.2525	7.60566	2.92555			3.28403	6.84759	7.10295
0.107917	10.3478	7.70484	2.98553			3.34663	7.00172	6.6949
0.108333	10.5158	7.62131	2.96702			3.40362	7.12136	6.66368
0.10875	10.5595	7.79926	2.96627			3.43732	7.24986	6.723
0.109167	10.6389	7.41684	3.02159			3.51086	7.30638	6.88007
0.109583	10.77	7.85154	2.97557			3.5832	7.40164	7.04857
0.11	10.839	8.46891	2.9736			3.63119	7.49916	7.16539
0.110417	10.812	8.44743	2.88298			3.72611	7.53899	7.30368
0.110833	10.9696	8.46167	2.98971			3.77744	7.53043	7.42129
0.11125	11.1877	8.42541	2.94517			3.83167	7.51947	7.54211
0.111667	11.2707	8.54688	3.04647			3.86474	7.83401	7.67547
0.112083	11.3945	8.66659	3.00134			3.95372	8.12241	7.87678
0.1125	11.5182	8.5714	2.98912			4.02148	8.34183	8.02459
0.112917	11.4811	8.41094	2.94225			4.11469	8.47571	8.09594
0.113333	11.7004	8.29886	2.96678			4.1883	8.68744	8.2437
0.11375	11.7827	8.62536	2.96408			4.26223	8.80397	8.39669
0.114167	11.7773	8.89584	2.99658			4.28321	8.83934	8.48365
0.114583	11.8032	9.06006	2.99819			4.36521	9.13574	8.70097
0.115	11.8691	9.20846	3.03379			4.45992	9.22652	8.83434
0.115417	12.0687	9.33348	3.05678			4.55739	9.34617	8.92784
0.115833	12.1564	9.41653	3.08446			4.62029	9.6764	9.07248
0.11625	12.3074	9.6124	3.09803			4.69761	9.65133	9.16091
0.116667	12.4148	9.74159	3.09293			4.79478	9.84491	9.35311
0.117083	12.4889	9.79541	3.08597			4.79728	9.8441	9.47267
0.1175	12.4819	9.80814	1.84632			4.84687	9.98552	9.68432
0.117917	12.5064	9.64952	1.80266			4.95846	10.2383	9.7639
0.118333	12.6934	9.44701	1.81451			4.98617	10.3255	9.90996
0.11875	12.6967	9.76859	1.80745			5.06227	10.4962	10.0694
0.119167	12.8346	9.81596	1.83023			5.1615	10.8116	10.1703
0.119583	12.9568	9.87747	1.8339			5.25367	10.6971	10.2965
0.12	12.9548	10.4058	1.85239			5.34919	10.7411	10.4547
0.120417	13.1399	10.4048	1.8589			5.43754	10.7608	10.5046
0.120833	13.3382	10.3553	1.85813			5.42116	10.8804	10.7428
0.12125	13.3411	10.7355	1.88355			5.4705	11.0902	10.8242
0.121667	13.467	10.7158	1.88725			5.5889	11.2286	10.9668
0.122083	13.5658	10.3522	1.89633			5.67686	11.2909	11.1663
0.1225	13.4388	10.4012	1.88157			5.73205	11.4589	11.1901
0.122917	13.6467	10.5658	1.90857			5.79664	11.5598	11.3938
0.123333	13.9059	10.5826	1.92395			5.84509	11.8027	11.4754
0.12375	13.928	10.8553	1.92352			5.90972	11.9751	11.5677
0.124167	13.9646	10.9179	1.93621			6.02802	12.1647	11.7922
0.124583	13.9532	10.7243	1.93691			6.17839	12.1431	11.9577
0.125	14.0579	10.6818	1.95801			6.15502	12.2311	12.0217
0.125417	14.131	11.3081	1.96493			6.19341	12.4357	12.235
0.125833	14.367	10.9093	1.98029			6.29398	12.533	12.3474
0.12625	14.2996	11.0265	1.9804			6.38668	12.698	12.4189
0.126667	14.3727	11.5711	2.00094			6.40878	12.831	12.4721
0.127083	14.3671	11.4535	2.00617			6.49105	12.8536	12.6052
0.1275	14.547	11.6527	2.00191			6.64393	13.242	12.8464
0.127917	14.756	11.8065	2.02348			6.64907	13.2178	12.8794
0.128333	14.8591	11.6862	2.02279			6.78417	13.3105	12.8404
0.12875	14.9544	12.1431	2.02622			6.90796	13.4484	12.913
0.129167	14.9147	11.9773	2.03585			6.91706	13.5082	12.9135
0.129583	14.7778	12.0331	2.06405			6.9918	13.7857	13.0082
0.13	14.7901	12.2574	2.05874			6.98864	13.958	12.4366
0.130417	15.0125	12.1372	2.061			7.08831	14.0143	10.3122
0.130833	15.1007	12.2812	2.07451			7.2167	14.1668	11.821
0.13125	15.2516	12.4613	2.08609			7.31457	14.4479	12.2125
0.131667	15.2754	12.4545	2.07938			7.35182	14.7304	12.4693
0.132083	15.2937	12.4539	2.12094			7.43956	14.5932	12.5981
0.1325	15.3333	12.521	11.2491			7.55586	14.8772	12.7646
0.132917	15.4792	12.6696	2.12965			7.65325	15.1753	14.8416
0.133333	15.4968	12.6186	4.88293			7.6889	15.1766	14.2759
0.13375	15.566	12.695	-24.0223			7.69673	15.2052	12.4515
0.134167	15.9299	13.1763	2.14926			7.87683	15.3674	12.5309
0.134583	15.9013	13.2259	2.1663			8.01157	15.4355	14.3672
0.135	15.8388	13.3297	2.17828			8.07308	15.7886	13.9482
0.135417	16.0537	13.849	2.18157			8.12013	16.1933	14.6418
0.135833	16.1759	13.2676	2.20156			8.1872	16.0679	12.9919
0.13625	16.2615	13.1789	2.18437			8.32906	15.9017	14.644
0.136667	16.1862	13.1121	2.18797			8.30544	16.1909	15.4155
0.137083	16.4312	13.4288	2.14765			8.41551	16.6956	14.4448
0.1375	16.5484	13.9022	2.22259			8.56676	16.7825	12.6579
0.137917	16.6803	13.8794	2.22378			8.66742	17.1863	15.691
0.138333	16.8655	14.3602	2.25317			8.74207	16.9029	16.5538
0.13875	16.9331	14.7084	2.24111			8.74065	16.9865	15.6093
0.139167	16.961	14.2802	2.24498			8.93725	17.3083	15.6881
0.139583	16.9927	13.8862	2.25383			9.00808	17.4946	15.6416
0.14	16.886	14.0727	2.25802			9.07178	17.4429	15.8079
0.140417	17.1565	14.568	2.27809			9.32668	17.666	15.463
0.140833	17.1354	14.2318	2.29856			9.24753	17.7862	14.579
0.14125	17.2501	14.4387	2.28811			9.37675	17.9529	14.5993
0.141667	17.3074	14.788	2.31161			9.53025	18.4513	15.3599
0.142083	17.2556	14.5263	2.31384			9.60256	18.4716	17.7368
0.1425	17.4178	14.6469	2.29319			9.67887	18.5539	17.2521
0.142917	17.6259	15.6199	2.31883			9.72258	18.7871	16.9728
0.143333	17.6855	15.4771	2.33018			9.89239	19.055	16.7687
0.14375	17.4864	15.3506	2.32652			9.94653	19.0127	16.8094
0.144167	17.96	15.1019	2.33379			10.024	18.8759	16.9432
0.144583	17.9214	15.353	2.34595			10.0879	18.9534	17.0018
0.145	17.8397	14.9437	2.34173			10.1949	19.1457	16.7352
0.145417	17.9185	15.4346	2.37079			10.2759	19.2065	16.07
0.145833	17.9346	15.5291	2.39988			10.4917	19.5316	13.0994
0.14625	17.9561	15.5062	2.40216			10.4796	19.911	11.6916
0.146667	17.8135	15.4718	2.41874			10.4405	20.2943	15.887
0.147083	17.8348	15.7538	2.42818			10.5282	20.0846	19.6988
0.1475	17.8587	15.962	2.42778			10.5625	19.948	18.4044
0.147917	18.1316	15.9406	2.44539			10.7492	20.0523	16.7487
0.148333	18.0051	16.0483	2.44179			10.7425	20.1516	17.5272
0.14875	18.3205	15.6716	2.45469			10.8915	20.1317	20.2167
0.149167	18.3564	15.9149	2.48101			11.0012	20.3394	19.8396
0.149583	18.4939	16.5795	2.49356			11.0581	20.4769	19.3854
0.15	18.485	16.779	2.49393			11.1251	20.6689	19.1864
0.150417	18.869	16.5802	2.52414			11.1546	20.6775	18.9352
0.150833	18.6419	15.8741	2.51139			11.2432	20.9316	18.955
0.15125	18.8122	16.3701	2.55032			11.2382	20.9918	18.9603
0.151667	19.7885	16.3327	2.54423			11.5533	21.2099	19.0011
0.152083	21.9876	23.4017	2.56906			11.7136	21.3513	19.2184
0.1525	18.8752	16.6318	2.56023			11.7305	21.3599	18.796
0.152917	23.22	15.8966	2.58851			11.679	21.8213	18.3252
0.153333	19.8754	15.1018	2.59326			11.7744	21.9466	18.2544
0.15375	22.4612	17.4749	2.59782			11.8449	21.8725	18.6266
0.154167	15.9556	15.7738	2.602			11.9195	22.0706	18.9638
0.154583	15.0984	15.6148	2.62172			12.1514	22.1946	18.9624
0.155	14.9115	15.375	2.63626			12.2939	22.39	19.2652
0.155417	15.1281	15.2844	2.65915			12.1283	22.2537	20.0489
0.155833	15.2123	15.4331	2.6564			12.1478	22.1904	20.7187
0.15625	15.1805	15.7411	2.66158			12.3694	22.5426	19.8268
0.156667	14.8831	15.7149	2.67633			12.2043	22.841	20.0568
0.157083	15.0689	15.4469	2.69049			12.2761	22.8912	20.5033
0.1575	15.5667	15.668	2.71351			12.467	22.9825	20.6004
0.157917	15.6639	16.1819	2.69523			12.4833	22.7819	20.7119
0.158333	15.5422	15.8439	2.71529			12.4688	23.0197	20.5672
0.15875	15.507	15.8404	2.72788			12.5328	22.7899	20.3759
0.159167	15.9157	15.854	2.72686			12.7384	23.0844	20.0097
0.159583	15.8058	16.1331	2.75276			12.6547	23.2477	20.2185
0.16	15.5755	16.2175	2.75538			12.8266	23.3116	21.8156
0.160417	15.7255	16.0885	2.76718			12.6789	23.3854	21.3197
0.160833	15.9212	15.8378	2.76416			12.9913	23.918	21.4035
0.16125	16.2071	16.0296	2.78087			13.05	23.6599	21.3133
0.161667	15.9758	16.2114	2.80455			13.2136	23.7092	21.236
0.162083	16.244	16.1737	2.80943			13.1811	23.6541	20.9664
0.1625	16.3556	15.9656	2.79077			13.1205	23.5683	20.9052
0.162917	16.4496	16.2035	2.8009			13.126	23.5135	22.5255
0.163333	16.5514	16.5116	2.82794			13.3086	23.6441	22.152
0.16375	16.4766	16.3914	2.84787			13.2846	23.6327	21.9657
0.164167	16.376	16.1799	2.84524			13.5011	23.7997	22.0542
0.164583	16.4499	16.4706	2.86429			13.6956	23.7108	22.1787
0.165	16.4583	16.4287	2.86262			13.7677	24.1717	22.355
0.165417	17.3918	16.7759	2.86582			13.7064	24.3348	22.2914
0.165833	16.8797	16.5101	2.86337			13.6883	24.2201	22.4326
0.16625	16.695	16.422	2.86866			13.7577	24.1041	22.409
0.166667	16.916	17.0387	2.89699			13.6712	24.3957	22.3128
0.167083	17.0825	16.9155	2.89852			13.8647	24.6167	22.4247
0.1675	16.7712	16.6397	2.88311			13.9743	24.7968	22.631
0.167917	16.8898	16.5666	2.89037			13.9968	24.5276	22.8356
0.168333	16.9723	16.9529	2.92018			14.2509	24.7328	22.6722
0.16875	17.3102	17.0704	2.93774			14.2494	25.0123	22.8043
0.169167	17.3209	17.2947	2.93856			14.267	25.2009	22.9177
0.169583	17.4526	17.3516	2.94907			14.3259	25.3624	23.098
0.17	17.268	17.1017	2.96882			14.5316	25.3327	23.1461
0.170417	17.5478	17.1769	2.99033			14.4011	25.2141	23.1211
0.170833	17.3151	17.5658	2.98094			14.6086	25.4377	23.3368
0.17125	17.6207	17.8419	3.00167			14.6458	25.5424	23.5736
0.171667	17.6842	17.4365	2.99867			14.7165	25.67	23.6582
0.172083	17.4464	17.3744	2.99996			14.6688	25.6059	23.6344
0.1725	17.4853	17.3328	3.02539			14.7176	25.7328	23.7964
0.172917	17.3734	17.581	3.02654			14.59	25.8169	23.9933
0.173333	17.6058	17.4753	3.03665			14.7726	25.6343	23.9829
0.17375	17.6525	17.6204	3.06981			14.9695	25.8034	24.1698
0.174167	17.785	17.7867	3.05879			14.9522	26.0689	24.3208
0.174583	18.0365	18.2336	3.06549			15.0629	25.6971	24.3489
0.175	18.0581	17.7645	3.07996			15.1663	25.9222	24.3679
0.175417	18.002	17.9453	3.12148			15.0865	25.9241	24.4
0.175833	17.877	17.9644	3.14174			15.2536	26.0216	24.3868
0.17625	17.8584	18.0474	3.135			15.4101	26.1492	24.6237
0.176667	17.8507	18.0868	3.13313			15.3075	26.2351	24.3477
0.177083	17.6996	18.1647	3.15417			15.3827	26.2971	24.4121
0.1775	17.9016	18.4581	3.16637			15.4567	26.2912	24.569
0.177917	18.1841	18.0873	3.18425			15.6679	26.374	24.523
0.178333	18.1499	18.088	3.19913			15.4447	26.4539	24.4781
0.17875	18.0359	18.5444	3.20829			15.6448	26.5167	24.8333
0.179167	18.1112	18.2738	3.23273			15.6337	26.636	24.7149
0.179583	18.056	18.5331	3.24067			15.7708	26.6748	24.6957
0.18	18.1891	18.3627	3.24657			15.804	26.7012	24.7583
0.180417	18.2873	18.5381	3.26341			15.8922	26.6853	24.9049
0.180833	18.3473	18.5993	3.27125			15.7954	26.7203	24.8005
0.18125	18.3588	18.9362	3.25653			16.0002	26.7557	24.8736
0.181667	18.4731	18.765	3.28269			16.1279	26.8378	25.0292
0.182083	18.5757	18.9488	3.28733			15.8208	26.9438	24.796
0.1825	18.4685	19.1174	3.28653			16.1362	27.0341	24.7234
0.182917	18.5127	18.9423	3.30776			16.0523	26.9739	23.8943
0.183333	18.5867	18.7165	3.32586			16.0734	26.9347	24.7676
0.18375	18.5244	18.877	3.33963			16.1646	27.1241	25.3293
0.184167	18.5466	19.2186	3.34322			16.1579	27.1759	24.8263
0.184583	18.5772	19.1874	3.34176			16.0207	27.2901	23.9263
0.185	19.053	19.097	3.38118			16.4288	27.4081	23.863
0.185417	18.6182	19.1923	3.38119			16.2569	27.3112	25.1971
0.185833	18.6711	19.1473	3.37715			16.4597	27.4515	24.1483
0.18625	18.8306	19.2431	3.39583			16.6609	27.4149	24.4535
0.186667	19.3315	19.1803	3.38263			16.3881	27.5467	24.5777
0.187083	19.6938	18.9635	3.42296			16.5782	27.3723	24.7528
0.1875	19.3013	19.4661	3.42696			16.5744	27.5013	24.761
0.187917	19.2851	19.4907	3.40703			16.6274	27.3962	24.7255
0.188333	19.4677	19.5231	3.43165			16.76	27.6185	24.6005
0.18875	19.5652	19.6284	3.46968			16.8269	27.3577	24.7
0.189167	19.3145	20.439	3.46153			16.6954	27.4062	24.9
0.189583	19.6076	19.7465	3.4667			16.9692	27.3878	25.0975
0.19	19.3718	19.4921	3.48432			16.9084	27.3527	25.1092
0.190417	19.4315	19.7586	3.46674			17.0574	27.8938	24.8589
0.190833	19.5906	19.991	3.52268			16.7772	27.8978	24.9127
0.19125	19.4898	20.4385	3.51702			16.8038	28.0903	24.9053
0.191667	19.3332	19.9964	3.53366			17.1441	28.1681	25.063
0.192083	19.3042	19.8027	3.51113			17.0627	27.9094	25.1416
0.1925	19.5588	19.9926	3.54804			17.0613	27.945	25.2996
0.192917	19.474	19.6278	3.57848			17.0828	28.2238	25.2105
0.193333	19.5723	20.3281	3.59321			17.1329	28.3572	25.1759
0.19375	19.8462	20.0881	3.58475			16.985	28.4443	25.125
0.194167	20.1489	20.4785	3.58302			17.1683	28.3931	25.057
0.194583	19.7557	20.4702	3.64062			17.1951	28.4068	25.5421
0.195	19.8483	20.2206	3.62929			17.175	28.5179	26.891
0.195417	19.844	20.2747	3.65835			17.2211	28.2246	26.3868
0.195833	20.0431	20.6053	3.64431			17.2744	28.1215	26.0902
0.19625	20.08	20.1075	3.64569			17.1507	28.1043	26.03
0.196667	20.1677	20.3466	3.67828			17.3504	28.2944	26.1025
0.197083	20.1384	20.5266	3.65257			17.1834	28.365	26.0593
0.1975	20.1989	20.3179	3.67276			17.1168	28.6962	26.2049
0.197917	20.2328	20.6009	3.68207			17.4338	28.6635	26.087
0.198333	20.1061	20.9012	3.72936			17.5692	28.6992	26.1434
0.19875	20.3439	20.4613	3.75175			17.3071	28.7346	26.1331
0.199167	20.1911	20.865	3.74608			17.3283	28.8457	26.0789
0.199583	20.6735	20.8172	3.77193			17.4483	29.3024	25.9125
0.2	20.6926	21.0789	3.76896			17.4137	29.0806	25.5751
0.200417	20.5105	21.3237	3.78181			17.411	28.9445	25.1613
0.200833	20.4517	20.8567	3.82043			17.5642	28.8876	25.1931
0.20125	20.7371	20.7374	3.8232			17.5872	29.0695	25.5004
0.201667	20.6619	20.8425	3.84423			17.6899	29.3234	26.1472
0.202083	20.5617	21.4253	3.84766			17.8463	29.1989	27.0877
0.2025	20.6179	20.7728	3.83061			17.7138	29.0761	27.1119
0.202917	20.5958	20.8723	3.88188			17.9474	29.1912	27.032
0.203333	20.5238	20.9277	3.89024			17.843	29.4107	26.9462
0.20375	20.3876	21.3176	3.88464			17.6856	29.5984	26.834
0.204167	20.6141	20.99	3.92471			17.7924	29.3519	26.8565
0.204583	20.4815	20.9693	3.94445			17.7155	29.3196	26.8916
0.205	20.5469	21.0603	3.93775			18.1077	29.2625	26.9413
0.205417	20.5442	21.0787	3.94386			18.1088	29.0675	26.9397
0.205833	20.7378	21.1548	3.99574			18.2458	29.4261	27.1575
0.20625	20.7765	21.4839	3.99281			18.1599	29.5612	27.1234
0.206667	20.6814	21.4729	4.00763			18.0066	29.5387	27.1007
0.207083	20.4123	21.457	4.01384			17.8832	29.3206	27.1567
0.2075	20.2746	21.37	4.0537			18.0534	29.4893	27.1472
0.207917	20.3085	21.5885	4.03707			18.0679	29.5395	26.9533
0.208333	20.552	21.6287	4.04822			17.846	29.7147	26.9419
0.20875	20.7048	21.8767	4.05363			18.1202	29.6364	26.8397
0.209167	20.6859	21.7049	4.07			18.0225	29.9002	26.7879
0.209583	20.5904	21.5966	4.10409			18.3317	30.0742	26.4415
0.21	20.6395	21.4089	4.10931			18.4081	30.0458	26.4017
0.210417	20.9839	21.2859	4.13697			18.3824	29.7738	26.2002
0.210833	21.0358	21.759	4.11903			18.3613	29.7101	25.6765
0.21125	21.068	21.6786	4.14806			18.2416	29.94	26.0084
0.211667	20.6986	21.8159	4.16928			18.3943	30.0392	26.1051
0.212083	20.7432	21.6706	4.1894			18.3551	30.0148	26.3713
0.2125	20.7157	21.6844	4.16956			18.5564	30.046	26.5213
0.212917	20.7069	21.9962	4.18674			18.4586	30.0042	26.5441
0.213333	20.7174	22.3143	4.18151			18.4026	30.04	26.2374
0.21375	20.8913	22.579	4.1911			18.5138	30.1296	26.1712
0.214167	20.9324	22.739	4.21578			18.5636	30.0816	26.1163
0.214583	20.7863	22.0268	4.24084			18.6531	30.1396	26.1641
0.215	20.9258	21.6939	4.25192			18.6952	30.0944	26.1636
0.215417	21.1097	22.1061	4.25857			18.5508	30.0128	26.0451
0.215833	21.1271	22.2025	4.26708			18.5	30.3699	25.9472
0.21625	20.9448	21.9886	4.27521			18.6543	30.3137	25.8873
0.216667	21.3655	22.054	4.31838			18.5334	30.397	25.5377
0.217083	21.1347	22.0526	4.31328			18.5745	30.453	25.4639
0.2175	21.1967	21.766	4.33004			18.5726	30.4899	25.4474
0.217917	21.2554	22.0595	4.35261			18.5076	30.4739	24.8633
0.218333	21.4146	22.2419	4.37072			18.2786	30.5202	24.5389
0.21875	20.8111	22.3055	4.40021			18.5568	30.5604	24.5307
0.219167	20.6543	22.1505	4.36693			18.518	30.6304	24.8392
0.219583	21.1622	22.3089	4.41068			18.576	30.5774	25.7081
0.22	21.0464	22.0922	4.43285			18.7037	30.5157	26.0682
0.220417	21.2529	22.1878	4.41461			18.6808	30.4807	26.4765
0.220833	21.2449	22.4455	4.44398			18.8441	30.5046	26.7021
0.22125	21.76	22.0679	4.44747			18.6506	30.4979	26.5457
0.221667	21.3401	22.9655	4.50227			18.7246	30.3823	26.6172
0.222083	21.5606	22.3929	4.51763			18.6084	30.3483	26.1773
0.2225	21.8954	22.6712	4.51452			18.8172	30.226	25.693
0.222917	21.3773	22.6947	4.50219			18.8908	30.3758	25.5541
0.223333	21.3481	22.6467	4.54279			18.8955	30.4144	24.9736
0.22375	21.6487	22.9271	4.54471			18.9784	30.328	24.9843
0.224167	21.6874	22.4215	4.5601			18.7544	30.587	25.2079
0.224583	21.394	22.8898	4.55849			18.6386	30.5745	26.0479
0.225	21.5332	22.4986	4.5722			18.7743	30.6981	26.0646
0.225417	21.533	22.8027	4.63566			19.0302	30.7355	25.4868
0.225833	21.528	22.4489	4.63631			18.9889	30.9343	26.4165
0.22625	21.3919	22.6669	4.61203			18.8973	30.8673	25.839
0.226667	21.6058	22.9669	4.6488			19.0754	30.9609	26.3118
0.227083	21.4622	22.4785	4.67427			18.9561	30.9431	27.0849
0.2275	21.5051	22.208	4.68712			19.0449	31.1547	27.8348
0.227917	21.8081	22.3803	4.75684			19.0763	30.8915	27.6757
0.228333	22.3526	22.7508	4.72703			19.1118	30.619	27.4128
0.22875	21.9796	22.4169	4.74688			18.9462	30.9037	27.5159
0.229167	21.6963	22.7185	4.78229			19.0671	30.989	27.2068
0.229583	21.521	22.9178	4.7899			19.085	31.3216	27.0386
0.23	21.7973	23.2005	4.77864			19.1617	31.0576	26.9551
0.230417	21.9143	22.4999	4.82026			19.189	31.0364	27.2423
0.230833	21.5602	22.8457	4.80537			18.9625	30.8926	27.323
0.23125	21.521	23.2768	4.82157			18.9846	30.826	27.1737
0.231667	21.4994	22.9515	4.84023			18.86	31.065	26.8887
0.232083	21.4626	22.6517	4.83886			19.3474	31.1812	26.9399
0.2325	21.9232	22.9951	4.9158			19.331	31.1239	27.0403
0.232917	21.6613	23.1655	4.91624			19.0867	31.0904	26.8353
0.233333	21.7701	22.8746	4.91761			19.2233	31.1529	26.7657
0.23375	21.6056	23.1613	4.92642			19.32	31.2242	26.5913
0.234167	21.5913	22.8554	4.94695			19.1804	31.3227	26.3016
0.234583	21.496	22.7544	4.99861			19.0877	31.4292	26.0807
0.235	21.4927	23.0326	5.02745			19.5258	31.3286	25.702
0.235417	21.709	22.9385	5.03382			19.4687	31.3154	25.6728
0.235833	21.7472	23.3046	5.02878			19.4458	31.5681	26.4196
0.23625	21.6327	23.8676	5.03101			19.4326	31.5927	26.7842
0.236667	21.5398	23.3229	5.12197			19.4569	31.6834	26.918
0.237083	21.5057	22.9329	5.10187			19.477	31.5663	26.7042
0.2375	21.7519	22.8621	3.99215			19.4659	31.268	26.2817
0.237917	21.3044	23.2536	5.91418			19.3306	31.5865	26.3355
0.238333	21.579	23.0135	6.75647			19.19	31.7627	26.236
0.23875	21.3901	23.2039	13.2172			19.3338	31.45	26.2294
0.239167	21.5908	23.0483	4.78589			19.3966	31.3551	25.6473
0.239583	21.7734	23.1765	5.1955			19.6135	31.744	25.1313
0.24	21.5043	23.0925	5.21017			19.5798	31.789	24.7644
0.240417	21.9369	23.2676	5.24306			19.5003	31.7249	25.3006
0.240833	21.7584	23.3964	5.23903			19.5624	31.6447	25.2657
0.24125	21.608	23.1553	5.2612			19.4682	31.6459	25.4792
0.241667	21.6052	23.5892	5.24926			19.5353	31.6139	26.0087
0.242083	21.6973	23.7215	5.30806			19.5198	31.7304	26.73
0.2425	21.8221	23.8524	5.29779			19.4328	31.725	28.9319
0.242917	21.6411	23.3617	5.30483			19.69	31.8107	29.7763
0.243333	21.694	23.6598	5.33885			19.5183	31.5381	29.1816
0.24375	21.8583	23.5032	5.3539			19.6753	31.6804	28.6271
0.244167	21.5499	23.5129	5.39537			19.7141	31.7768	28.5762
0.244583	21.7925	23.1964	5.40997			19.9001	31.6266	28.2308
0.245	21.9201	23.2654	5.43475			19.7927	31.589	28.0214
0.245417	21.7431	23.0611	5.44668			19.6599	31.7643	27.7305
0.245833	21.9652	22.9465	5.48608			19.4663	31.678	27.8277
0.24625	22.0066	23.865	5.43196			19.5973	31.623	27.8535
0.246667	22.1022	23.373	5.48142			19.6412	31.3927	27.6586
0.247083	22.0834	23.4693	5.48695			19.5531	31.353	27.6464
0.2475	22.0181	23.5866	5.51844			19.8247	31.4799	27.9759
0.247917	21.7788	23.8187	5.51205			19.8068	31.8246	27.984
0.248333	21.9018	23.5696	5.52672			19.8318	31.8002	27.8053
0.24875	21.9564	23.5161	5.54076			19.8229	31.775	27.61
0.249167	22.6631	24.0611	5.55881			19.9657	31.9612	27.5644
0.249583	22.2045	23.4667	5.61621			19.7936	31.7848	27.3066
0.25	21.9226	23.2678	5.62353			20.0334	31.7754	27.4355
0.250417	21.8041	23.1551	5.59892			19.7556	31.6498	27.2107
0.250833	21.987	23.4326	5.63152			19.7849	31.689	27.0964
0.25125	22.2611	23.9047	5.67205			19.7611	31.7841	26.9046
0.251667	22.0963	23.6615	5.65234			19.6071	31.972	26.4897
0.252083	22.1958	23.3569	5.6952			19.7222	31.9059	26.3392
0.2525	22.1765	23.5993	5.6644			19.8001	31.6994	26.1303
0.252917	22.3715	24.1041	5.68239			19.9792	31.7614	25.2536
0.253333	22.7394	23.8202	5.68017			20.0203	32.0253	25.1561
0.25375	22.7897	23.7627	5.78613			19.9895	31.9854	24.9068
0.254167	22.2734	23.7232	6.91093			19.8463	31.8843	24.3615
0.254583	22.4781	23.7021	-18.6822			19.6723	31.9456	24.4382
0.255	22.1313	23.8112	-79.568			19.9855	32.1212	25.409
0.255417	22.3096	23.8381	5.97004			20.1931	32.0582	27.0405
0.255833	22.1737	23.7111	8.05048			19.9718	32.2103	28.4945
0.25625	22.4131	23.6028	47.8264			20.1453	32.1677	29.3812
0.256667	22.5098	23.7002	7.65895			20.0729	32.225	28.7456
0.257083	22.3192	23.3565	7.42514			20.0159	32.2043	27.9059
0.2575	22.2869	23.7903	7.52148			19.804	32.1187	27.4784
0.257917	22.7587	24.1508	7.47201			20.0204	32.0544	27.1054
0.258333	22.6608	24.171	7.41714			19.9144	32.0671	26.7773
0.25875	22.115	23.8065	49.5358			20.0921	32.0667	27.1092
0.259167	21.9148	23.7801	6.04139			20.0657	32.2232	27.0958
0.259583	22.0268	23.8229	6.03617			20.1118	32.3678	26.9191
0.26	22.208	23.8228	6.03359			20.0052	32.5244	26.6551
0.260417	22.1934	23.2769	6.06675			20.2515	32.4894	25.895
0.260833	22.1213	23.7083	6.08902			20.0677	32.4406	26.7214
0.26125	22.2544	23.4925	6.12367			19.975	32.3717	26.5993
0.261667	21.8417	23.7463	6.20148			20.008	32.469	25.8576
0.262083	22.346	23.7187	6.1644			20.1152	32.4378	25.3528
0.2625	22.1722	24.0932	6.17571			20.1427	32.3813	25.3887
0.262917	22.4328	24.3727	6.20521			19.8863	32.3348	25.2484
0.263333	22.1649	24.3233	6.22151			20.2162	32.3154	27.7839
0.26375	22.0416	24.327	6.2754			19.9384	32.3242	28.8851
0.264167	21.7999	24.0345	6.29223			20.3101	32.4436	28.8438
0.264583	21.9564	24.0969	6.24725			20.3785	32.5418	28.1279
0.265	21.9526	24.4277	6.26871			20.198	32.573	28.2822
0.265417	22.072	23.9423	6.29217			20.1776	32.534	28.4065
0.265833	22.1312	24.2041	6.35855			20.2277	32.227	27.8329
0.26625	22.0416	24.284	6.34689			20.2205	32.3221	28.1218
0.266667	21.9718	24.1472	6.41246			20.1827	32.3939	27.6021
0.267083	21.7443	24.5128	6.41757			20.3753	32.3253	27.4792
0.2675	21.9363	24.4864	6.42575			20.1765	32.3546	27.3036
0.267917	22.2526	24.0203	6.41312			20.4076	32.4099	27.1607
0.268333	22.1825	24.7512	6.43968			20.3809	32.3737	26.9669
0.26875	22.5989	24.5427	6.50364			20.4471	32.2789	26.7011
0.269167	22.7716	24.1493	6.53792			20.2196	32.1436	26.4339
0.269583	22.771	24.3906	6.55698			20.2442	32.1001	25.9285
0.27	22.7368	24.347	6.51303			20.4642	32.1797	25.3484
0.270417	22.4348	24.4241	6.55137			20.346	32.2397	24.447
0.270833	22.5827	23.9172	6.57143			20.2706	32.1534	24.3268
0.27125	22.5549	23.6775	6.59851			20.2792	32.1625	23.6494
0.271667	22.3218	23.896	6.62616			20.2745	32.231	23.906
0.272083	22.2722	24.2531	4.7825			20.0442	32.324	24.5814
0.2725	22.417	24.591	6.74713			20.2335	32.3295	24.1486
0.272917	22.4495	23.9102	9.94493			20.3603	32.2957	23.9493
0.273333	22.7097	23.7595	8.182			20.4639	32.222	24.166
0.27375	22.029	24.3921	-8.5074			20.3299	32.2328	23.3593
0.274167	22.0956	24.2016	8.9044			20.3898	32.3418	24.1393
0.274583	22.1608	23.9388	8.28441			20.5041	32.3837	28.5614
0.275	22.3699	24.1692	8.22968			20.4471	32.2654	29.4017
0.275417	22.0648	24.2451	8.19823			20.4262	32.3928	29.6501
0.275833	22.0228	24.5196	8.28889			20.4373	32.5524	30.0589
0.27625	22.6158	24.1498	8.27077			20.5163	32.4158	29.551
0.276667	22.634	24.1461	8.29019			20.3205	32.3659	28.9374
0.277083	22.4414	24.2119	8.30545			20.4422	32.4589	28.7095
0.2775	23.0651	23.6417	8.39751			20.4161	32.6237	28.0464
0.277917	22.4	24.1088	8.4241			20.4045	32.5407	28.0028
0.278333	22.2766	24.4197	6.95746			20.7361	32.5829	27.6866
0.27875	22.4873	24.3735	6.92842			20.5937	32.4293	28.8999
0.279167	22.3725	23.8715	6.94688			20.5263	32.479	28.3428
0.279583	22.456	24.3276	6.97769			20.5808	32.4982	28.7647
0.28	22.3691	24.7452	7.01381			20.784	32.4821	29.3757
0.280417	21.969	24.1483	7.05946			20.654	32.595	29.45
0.280833	21.9327	24.6789	7.05056			20.5983	32.5086	29.2338
0.28125	22.7068	24.4841	7.074			20.4358	32.5665	29.51
0.281667	22.1991	24.9854	7.08148			20.6762	32.6163	29.3811
0.282083	22.6303	24.6617	7.14526			20.6176	32.7576	29.455
0.2825	22.2195	24.6656	7.13872			20.7683	32.6969	29.7818
0.282917	22.2958	24.6602	7.09603			20.6422	32.7941	29.8962
0.283333	22.2491	24.1849	7.15761			20.7546	32.8044	29.553
0.28375	22.3737	24.35	7.18004			20.7355	32.8592	29.459
0.284167	22.4099	24.7	7.17208			20.6656	32.7457	29.4768
0.284583	22.2359	24.4001	7.16508			20.6546	32.9917	29.1451
0.285	22.5078	24.2855	7.2818			20.7556	33.0552	28.873
0.285417	22.6686	24.7697	7.27417			20.7332	33.0791	28.4896
0.285833	22.6309	24.435	7.29452			20.5989	33.185	28.7139
0.28625	22.2792	24.4911	7.28868			20.798	33.0698	29.9901
0.286667	22.2509	24.0117	7.33384			20.6342	32.7569	29.865
0.287083	22.1155	24.3702	7.38398			20.7469	32.6733	29.9236
0.2875	22.3957	24.2917	-13.9925			20.6287	32.7002	30.1335
0.287917	22.0795	24.7634	6.89005			20.741	32.8956	30.2588
0.288333	22.1344	24.3712	10.973			20.8204	32.8919	30.5097
0.28875	22.462	24.6758	9.78471			20.7924	32.8267	30.6344
0.289167	22.248	24.4302	8.42755			20.7419	33.0307	30.6559
0.289583	22.1843	24.6028	7.5926			20.8393	32.9544	30.7616
0.29	22.2975	24.3555	3.85545			20.7235	32.8997	30.6503
0.290417	22.2578	24.2242	7.47688			20.8252	32.7599	30.6966
0.290833	22.0997	24.083	7.85559			20.7675	32.6419	30.4158
0.29125	22.0457	24.3138	36.5068			20.7239	32.6673	30.0078
0.291667	21.9571	24.6084	8.11882			20.8189	32.8601	29.9348
0.292083	22.1109	24.7282	9.3187			20.7264	32.8607	30.3599
0.2925	21.8396	24.8525	9.23863			20.7875	32.7928	30.5011
0.292917	22.0565	25.2047	9.2551			20.7462	32.8656	30.4607
0.293333	22.2643	24.7201	9.33721			20.7543	32.8404	30.5293
0.29375	22.2758	25.0357	9.3491			20.6916	32.6453	30.5149
0.294167	22.256	24.7706	9.39018			20.6654	32.9541	30.3275
0.294583	22.3303	24.3768	9.41135			20.7613	32.9328	30.4145
0.295	22.0707	24.7239	9.40156			21.0488	32.5819	30.497
0.295417	21.9368	25.3161	9.32577			20.8511	32.5396	30.407
0.295833	22.3843	24.9849	9.34437			20.8773	32.4337	30.3955
0.29625	22.2227	24.849	9.41026			20.925	32.5519	30.4182
0.296667	22.209	25.2813	9.45244			20.9079	32.6981	30.3493
0.297083	22.5078	25.1734	9.37906			21.1955	32.5629	30.1792
0.2975	22.3457	24.5949	9.46605			21.1607	32.6676	30.1614
0.297917	22.2327	24.8231	9.49955			21.0852	32.7773	30.1396
0.298333	22.3119	25.4393	7.95805			20.8621	32.8274	30.2664
0.29875	22.2013	25.2605	7.99977			20.8696	32.676	30.3471
0.299167	22.7268	25.0141	7.98258			20.8501	32.6074	30.5355
0.299583	22.8434	24.9629	8.08628			21.0002	32.5048	30.3316
0.3	22.2656	24.3622	8.00844			20.9514	32.409	30.2638
0.300417	22.3435	24.8728	8.0717			20.8789	32.5498	30.3382
0.300833	22.4139	24.7909	8.01861			21.1994	32.5003	30.3383
0.30125	22.3668	24.7277	8.00625			21.1242	32.4004	30.3636
0.301667	22.1931	24.9873	8.04227			20.7373	32.598	30.3438
0.302083	22.3701	24.874	8.11292			21.2726	32.6299	30.3318
0.3025	22.7634	24.5399	8.12595			21.1869	32.6799	30.3215
0.302917	22.9678	24.9174	8.135			21.2256	32.8162	30.4081
0.303333	23.0235	24.4368	8.13646			21.1082	32.8132	30.4767
0.30375	22.7196	24.7706	8.24918			20.8953	32.8337	30.247
0.304167	22.6147	24.772	8.18873			20.9087	32.6442	30.3472
0.304583	22.7617	24.8495	8.2404			21.022	32.6643	30.4719
0.305	22.6351	24.8452	8.28817			20.9536	32.6308	30.4071
0.305417	22.6682	24.4928	8.29716			21.264	32.773	30.5095
0.305833	22.2782	24.7518	8.29806			21.178	32.7965	30.4162
0.30625	22.2946	24.7965	8.30459			21.2311	32.8001	30.4438
0.306667	22.1008	24.8956	8.31469			21.056	32.6469	30.4006
0.307083	22.0783	24.4071	10.0223			21.4121	32.6944	30.3559
0.3075	22.0269	24.666	0.156143			21.1101	32.6209	30.3922
0.307917	22.1766	24.607	9.85804			21.2538	32.7105	30.3351
0.308333	22.581	25.3274	9.74581			21.2312	32.6	30.3252
0.30875	22.8178	25.0889	-107.038			21.2836	32.7754	30.4565
0.309167	23.0015	25.0723	8.30326			21.2084	32.8189	30.368
0.309583	22.5267	25.2259	-13.0985			21.1099	32.7603	30.4192
0.31	22.595	25.5344	-88.1798			21.2379	32.7063	30.3901
0.310417	22.4843	24.9245	9.92189			21.3149	32.7516	30.3646
0.310833	22.6624	24.5133	9.90445			21.4632	32.7439	30.3773
0.31125	22.5723	24.8596	9.9075			21.3577	32.6976	30.2723
0.311667	22.2346	24.6078	9.9607			21.3421	32.6813	30.373
0.312083	22.4513	24.6993	10.0321			21.359	32.729	30.3839
0.3125	22.1922	24.8438	10.0004			21.4921	32.8668	30.1542
0.312917	22.1753	24.788	10.055			21.3747	32.8585	30.1354
0.313333	22.2242	25.1019	10.1828			21.3258	32.8133	30.1713
0.31375	22.3969	25.737	10.1401			21.2858	32.7842	30.1274
0.314167	22.142	25.0607	10.1993			21.4006	32.7615	30.2113
0.314583	22.7473	25.1925	10.185			21.5679	32.7081	30.146
0.315	22.6196	25.1039	10.132			21.4158	32.641	30.1877
0.315417	22.4192	25.733	10.3021			21.266	32.6225	30.2309
0.315833	22.6715	25.4434	10.231			21.4502	32.7515	30.1235
0.31625	22.5639	25.1741	10.2255			21.4811	32.7759	30.0896
0.316667	22.3945	25.3708	10.2665			21.4391	32.735	30.1293
0.317083	22.0337	24.7217	10.3165			21.4896	32.7838	30.0537
0.3175	22.0828	25.2553	10.5197			21.3062	32.7894	30.0136
0.317917	21.8939	25.0322	8.95238			21.2364	32.654	30.1063
0.318333	22.3514	25.3425	8.9255			21.3095	32.635	29.8917
0.31875	21.9588	25.2369	9.01713			21.5419	32.6335	29.8566
0.319167	22.1364	24.8473	9.02053			21.4477	32.7005	29.9523
0.319583	22.0679	24.8259	8.98863			21.5487	32.7362	29.9812
0.32	21.6219	25.0307	8.96492			21.5735	32.6612	29.8819
0.320417	21.9609	24.8485	9.00261			21.6449	32.6416	29.8754
0.320833	22.0355	24.898	9.0485			21.7188	32.658	29.9925
0.32125	21.7919	24.9961	9.1451			21.5536	32.7849	29.8221
0.321667	22.2537	24.9776	9.13331			21.6199	32.6269	29.8704
0.322083	22.048	24.6334	9.14894			21.4599	32.8136	29.8069
0.3225	22.1088	24.9377	9.1592			21.3955	32.8932	29.8756
0.322917	22.1428	24.9298	9.17241			21.2229	33.0995	29.7798
0.323333	21.9659	24.8878	9.23387			21.4007	33.137	29.8286
0.32375	21.9233	24.6225	9.22188			21.4281	33.133	29.7444
0.324167	22.0108	25.1256	9.20751			21.4912	33.1304	29.8098
0.324583	21.8205	25.1493	9.20437			21.5744	33.1498	29.7787
0.325	21.8156	24.9377	9.28575			21.5736	32.9396	29.7341
0.325417	21.8225	25.6041	9.34582			21.4914	32.9875	29.7382
0.325833	22.368	25.332	9.29584			21.5523	32.7807	29.8334
0.32625	22.2472	24.8646	9.29016			21.4268	32.8232	29.7381
0.326667	22.1103	24.7447	9.28549			21.5335	32.7546	29.8005
0.327083	22.1177	24.5885	33.3634			21.5167	32.7447	29.7538
0.3275	22.2143	24.8841	9.30659			21.48	32.6131	29.7982
0.327917	22.3228	25.0501	9.23895			21.5415	32.8066	29.782
0.328333	22.0612	24.8912	6.60043			21.6553	32.9537	29.8528
0.32875	22.2545	24.808	11.2282			21.6892	32.8635	29.8346
0.329167	21.9982	25.0796	14.2469			21.582	32.777	29.8564
0.329583	22.1251	25.0509	10.9887			21.7581	32.9987	29.7511
0.33	22.3771	25.1928	10.8889			21.6779	33.1508	29.6555
0.330417	22.3118	25.2386	11.0166			21.7597	32.9755	29.7961
0.330833	22.2454	25.209	10.9984			21.7665	32.8954	29.7345
0.33125	22.0962	25.2719	10.9335			21.5838	32.9599	29.774
0.331667	22.8341	25.1297	11.0881			21.7714	33.078	29.7558
0.332083	22.4622	25.0841	11.0246			21.8373	33.0113	29.7283
0.3325	22.4392	25.5472	11.1202			21.7881	32.7725	29.7517
0.332917	22.1686	24.8251	11.15			21.7587	32.6813	29.678
0.333333	22.3784	25.6104	11.1888			21.8713	32.5894	29.7039
0.33375	22.1988	24.8425	11.1518			21.7532	32.8137	29.7059
0.334167	21.9196	24.9179	11.1461			21.8032	32.7812	29.7152
0.334583	21.9433	25.4367	11.2789			21.6335	32.9322	29.7077
0.335	22.0375	25.5988	11.3265			21.8584	33.008	29.6795
0.335417	22.0325	25.2702	11.4424			21.9229	32.997	29.6793
0.335833	22.0683	25.2957	11.4398			21.7385	32.8777	29.763
0.33625	22.0279	25.1511	11.4098			21.876	32.7535	29.9008
0.336667	21.9075	24.997	11.3976			21.6978	32.815	29.849
0.337083	22.5267	25.3366	11.4276			21.8133	32.8779	29.7531
0.3375	22.3577	25.4753	9.93201			21.9046	32.9008	29.6635
0.337917	22.245	25.1897	9.93639			21.9086	32.7811	29.6285
0.338333	22.5562	25.119	9.98126			21.9142	32.632	29.6373
0.33875	22.3366	25.1301	9.94316			21.8963	32.7819	29.6015
0.339167	22.1089	25.2435	9.99094			21.8642	32.941	29.66
0.339583	22.1704	25.1677	10.1225			21.9325	32.8067	29.5951
0.34	22.3543	25.2919	10.0447			21.9767	32.7952	29.5973
0.340417	21.9359	25.5464	10.0828			21.9199	32.6781	29.7601
0.340833	22.2476	24.687	10.1215			21.7195	32.8315	29.6898
0.34125	22.0596	25.1638	10.1176			22.0063	32.8376	29.6933
0.341667	21.8026	25.7316	10.1698			22.0168	32.9201	29.6658
0.342083	22.0031	25.7329	10.2709			22.0844	33.0709	29.6239
0.3425	21.9529	25.6423	10.1955			21.94	33.0168	29.5745
0.342917	22.2573	25.5893	10.1712			21.9654	32.9981	29.6144
0.343333	21.9081	25.0162	10.2136			21.934	33.0009	29.6424
0.34375	21.8198	25.5952	10.2285			21.9447	33.0366	29.5865
0.344167	21.9107	25.2492	10.2563			21.8679	33.0354	29.6224
0.344583	22.0923	25.5272	10.364			22.0447	32.9548	29.5537
0.345	22.2049	25.4733	10.3453			21.9862	32.9948	29.4243
0.345417	22.0738	25.0405	10.345			22.023	32.9061	29.4607
0.345833	22.1757	24.9593	10.4267			21.9757	32.8511	29.5318
0.34625	21.8161	25.2249	10.3383			22.1126	32.7481	29.5119
0.346667	21.8975	25.9763	10.3871			22.1632	32.8216	29.3811
0.347083	21.6973	25.0665	10.4545			22.0492	33.0119	29.4095
0.3475	21.7654	24.9745	10.4094			22.0092	32.8203	29.4624
0.347917	21.7911	25.1968	10.4106			21.8361	32.7278	29.3756
0.348333	21.7933	25.2671	10.4259			22.0106	32.8558	29.3619
0.34875	21.7909	25.1938	10.5189			22.1891	33.0074	29.3214
0.349167	21.3684	25.2897	10.4417			22.2533	32.9838	29.318
0.349583	21.5205	25.7359	10.5445			22.0796	32.6967	29.4007
0.35	21.4935	25.0484	10.513			22.311	32.7631	29.3554
0.350417	21.6936	24.9296	10.5548			22.2218	32.766	29.3973
0.350833	21.695	25.1787	-1.38535			22.0876	32.8502	29.3492
0.35125	22.2154	25.5264	11.9058			22.144	32.8494	29.2594
0.351667	21.867	25.4172	68.9757			22.1069	32.8113	29.2796
0.352083	21.8314	25.381	12.2107			22.1171	32.7737	29.2919
0.3525	21.9651	25.4112	12.224			22.0861	32.7835	29.348
0.352917	21.632	25.3717	12.1605			22.04	32.7489	29.2912
0.353333	21.9916	25.8849	12.317			22.2112	32.9382	29.233
0.35375	22.1089	25.4948	12.1863			22.2478	32.9892	29.302
0.354167	21.987	25.5977	12.249			22.3616	32.9901	29.3496
0.354583	21.9493	25.1641	12.2951			22.1726	33.1574	29.3406
0.355	21.8016	25.4979	12.1726			22.185	32.9944	29.355
0.355417	21.5046	25.677	12.14			22.0804	33.1068	29.3155
0.355833	21.7715	25.313	12.2463			22.0704	33.1202	29.3075
0.35625	21.7782	25.1932	12.3119			22.1136	33.1848	29.1862
0.356667	21.8816	25.5146	12.2583			22.0829	33.2544	29.2379
0.357083	21.8643	25.7157	12.3914			22.3908	33.3524	29.2705
0.3575	22.0322	25.2252	10.8381			22.4828	33.3011	29.2098
0.357917	21.9197	25.3233	10.8913			22.2856	33.3326	29.1868
0.358333	21.8905	25.2721	10.9864			22.3339	33.2724	29.259
0.35875	22.1095	25.3748	11.0018			22.1036	33.4791	29.2124
0.359167	21.9443	25.9738	11.0498			22.1297	33.2613	29.1397
0.359583	22.0482	25.5082	10.9493			22.2735	33.194	29.1959
0.36	22.035	25.2137	10.9411			22.1793	33.2108	29.1829
0.360417	22.1205	25.7873	11.1029			22.3069	33.3329	29.1679
0.360833	21.8713	25.4073	11.108			22.4323	33.3538	29.291
0.36125	22.2608	25.273	11.071			22.3739	33.3246	29.1995
0.361667	22.0923	25.1552	11.1829			22.3675	33.3847	29.2713
0.362083	22.0545	25.4391	11.1205			22.3066	33.2958	29.2783
0.3625	22.0429	25.1693	11.1652			22.2694	33.3827	29.1147
0.362917	21.7611	25.4211	11.1792			22.2814	33.3842	29.0483
0.363333	21.886	25.9207	11.1656			22.4156	33.1771	29.082
0.36375	22.0524	25.9	11.1768			22.3879	33.4476	29.1369
0.364167	21.9529	25.2903	11.2596			22.3198	33.4423	29.1221
0.364583	21.7554	25.6605	11.2975			22.2826	33.4807	29.1976
0.365	22.103	25.4309	11.3298			22.4976	33.4297	29.2582
0.365417	21.8745	25.5685	11.2052			22.2263	33.4685	29.1455
0.365833	21.7415	25.7722	11.252			22.6948	33.4606	29.1022
0.36625	21.7543	25.3888	11.2634			22.5014	33.4036	29.2418
0.366667	21.6111	25.3687	11.2656			22.4874	33.4685	29.3002
0.367083	21.7634	25.4558	11.3298			22.3755	33.4235	29.401
0.3675	22.2126	25.2933	11.3416			22.3598	33.3957	29.5364
0.367917	22.3822	25.4394	11.3667			22.6137	33.373	29.4117
0.368333	22.1061	25.2402	17.6869			22.5816	33.3703	29.3741
0.36875	21.9445	25.0748	11.7341			22.5625	33.2886	29.3689
0.369167	22.2536	25.0788	11.5367			22.5058	33.2155	29.2902
0.369583	21.816	25.7163	11.431			22.4569	33.2631	29.2542
0.37	21.8319	26.0147	11.4948			22.5508	33.2448	29.1703
0.370417	22.2866	25.7217	11.5031			22.5117	33.1196	29.2154
0.370833	21.9221	25.7998	11.4823			22.469	33.1172	29.2573
0.37125	21.7676	25.783	10.6375			22.5864	33.2313	29.2991
0.371667	21.9734	25.6757	12.9706			22.5959	33.1977	29.3654
0.372083	21.9622	25.5203	13.0234			22.735	33.1279	29.4355
0.3725	21.8878	26.0439	13.033			22.5669	33.1244	29.3706
0.372917	21.815	25.3472	13.0389			22.587	33.1578	29.3184
0.373333	21.8308	25.3819	13.1067			22.6902	33.0486	29.2733
0.37375	21.8486	25.4951	13.0658			22.6253	33.1404	29.1903
0.374167	21.8079	26.1175	13.0794			22.6733	33.1407	29.2342
0.374583	21.5353	25.4069	13.1959			22.5555	32.952	29.2165
0.375	21.7559	25.7209	13.1646			22.5637	32.831	29.2012
0.375417	21.606	26.0817	13.1072			22.7328	32.8796	29.2786
0.375833	21.8218	25.8741	13.2824			22.7507	32.9379	29.1388
0.37625	21.9072	25.6631	13.3506			22.723	32.9537	29.167
0.376667	22.1125	25.1072	13.3148			22.6201	32.9478	29.186
0.377083	21.9337	25.6868	13.3197			22.6954	33.0851	29.1219
0.3775	21.5952	25.6178	13.355			22.6945	32.939	29.1647
0.377917	21.7175	25.7442	13.2854			22.5258	32.9214	29.221
0.378333	22.2285	25.8599	11.9323			22.6192	33.0605	29.2477
0.37875	22.2197	25.8427	11.8872			22.8983	33.0966	29.1187
0.379167	21.7183	25.791	11.8505			22.8137	33.0246	29.155
0.379583	22.5554	25.7319	11.863			22.574	33.0604	29.1716
0.38	21.895	25.8093	11.8988			22.6299	33.0539	29.1131
0.380417	21.4619	25.7812	11.9859			22.7925	33.0853	29.089
0.380833	21.1978	25.818	11.969			23.0365	33.1879	29.0495
0.38125	21.2474	25.634	11.9536			22.8776	33.2053	29.1332
0.381667	21.3042	25.8323	11.9977			22.891	33.2155	28.9824
0.382083	21.8476	25.9934	11.9658			22.865	33.3492	28.9514
0.3825	21.8168	26.1052	12.031			22.8139	33.3627	28.9117
0.382917	21.3285	26.0734	12.0942			23.0117	33.3513	28.9991
0.383333	21.5689	25.4772	12.0929			22.9671	33.3972	28.9443
0.38375	21.4634	25.5779	12.1191			22.8087	33.3714	29.0267
0.384167	21.3008	25.5647	12.2247			22.7327	33.4697	29.0145
0.384583	21.2198	25.7196	12.1747			22.8496	33.4257	29.4553
0.385	21.3848	25.692	12.222			22.8498	33.4784	29.4653
0.385417	21.1096	25.8102	12.1777			23.0058	33.4668	29.3777
0.385833	21.1827	25.5478	12.188			22.8857	33.4168	29.2899
0.38625	21.5255	25.8098	12.248			22.8855	33.4606	29.3736
0.386667	21.3741	25.7202	12.2132			22.9828	33.5501	29.3093
0.387083	21.5546	25.3533	12.2243			22.9748	33.5529	29.4243
0.3875	21.7424	25.5007	12.1737			22.7634	33.5031	29.4103
0.387917	21.685	25.746	12.1576			22.8423	33.5841	29.3343
0.388333	21.4536	25.6315	7.45337			22.966	33.5478	29.2338
0.38875	21.4263	25.6452	108.217			22.9221	33.4365	29.2929
0.389167	21.3549	25.4462	11.7914			22.8961	33.5468	29.3675
0.389583	21.4459	26.2813	16.2531			22.9216	33.5896	29.3738
0.39	21.4665	25.9131	14.0379			23.0365	33.5502	29.2913
0.390417	21.3915	25.7391	13.3686			23.0569	33.5547	29.1986
0.390833	21.4435	26.0496	13.8845			22.933	33.5144	29.2388
0.39125	21.1847	26.2016	13.9692			22.7188	33.5786	29.2206
0.391667	21.2867	25.9491	13.9531			22.9198	33.5823	29.2562
0.392083	21.0908	25.4444	14.0514			23.0677	33.6055	29.2413
0.3925	21.2267	25.7937	13.9546			23.128	33.7339	29.2071
0.392917	21.2671	25.5683	13.9383			23.0984	33.7569	29.1974
0.393333	21.4448	25.5933	13.9329			22.9803	33.6915	29.2432
0.39375	21.5511	25.9617	14.0147			22.9666	33.6333	29.2641
0.394167	21.2696	25.5162	14.0881			22.9631	33.5932	29.1531
0.394583	21.0205	25.4975	14.1217			23.0974	33.6567	29.2049
0.395	21.1762	25.58	14.1751			22.9721	33.5855	29.1967
0.395417	21.6381	25.4707	14.1239			23.0798	33.6037	29.1601
0.395833	21.4805	25.7303	14.0979			23.0318	33.74	29.152
0.39625	21.3364	25.8354	14.1355			22.9902	33.7833	29.1323
0.396667	21.3331	25.7191	14.1897			23.0571	33.6948	29.0516
0.397083	21.3049	25.924	14.2451			23.0524	33.7343	29.0413
0.3975	21.5448	25.5622	14.2431			23.085	33.7595	29.0645
0.397917	21.4146	25.848	14.2432			23.3525	33.7903	29.0143
0.398333	21.3758	25.6133	14.2583			23.1886	33.8386	29.0723
0.39875	21.4397	25.2559	14.3145			23.2257	33.829	29.0105
0.399167	21.8009	25.2818	12.6652			23.1167	33.8537	28.9329
0.399583	21.6132	25.4772	12.732			23.1335	33.8299	28.939
0.4	21.4233	25.8297	12.8539			23.0507	33.805	28.9491
0.400417	21.4526	25.6725	12.8361			22.9112	33.876	28.798
0.400833	21.1621	25.6068	12.8778			23.112	33.8631	28.7334
0.40125	21.4696	25.738	12.8564			23.1605	33.8824	28.7027
0.401667	21.3138	25.5986	12.8583			23.1674	33.8952	28.7673
0.402083	21.3596	25.6169	12.8526			23.1565	33.8274	28.8449
0.4025	21.5395	25.5634	12.9355			23.18	33.7609	28.8673
0.402917	21.6005	25.83	12.9608			23.3502	33.7481	29.0713
0.403333	21.5603	25.4415	13.0175			23.3284	33.7703	29.2442
0.40375	21.1838	25.4763	12.9177			23.3063	33.7677	29.3063
0.404167	21.2396	25.9812	12.9515			23.4377	33.734	29.2909
0.404583	21.5776	25.9725	12.9957			23.3238	33.7884	29.2284
0.405	21.3587	25.8308	12.9682			23.3717	33.7379	29.2394
0.405417	21.3279	25.6242	13.0122			23.3609	33.7572	29.2261
0.405833	21.3943	26.1907	13.0429			23.3418	33.7557	29.2665
0.40625	21.2387	25.9236	13.1105			23.42	33.8135	29.2086
0.406667	21.2992	26.0704	13.0866			23.576	33.8492	29.2662
0.407083	21.0767	26.1521	12.9871			23.3356	33.8527	29.275
0.4075	21.5263	25.6522	43.8755			23.3971	33.8354	29.4602
0.407917	21.4428	25.5164	14.5778			23.5988	33.8233	29.5172
0.408333	21.3597	25.9787	14.7054			23.3453	33.7951	29.3821
0.40875	21.4867	25.5095	13.8327			23.4853	33.8811	29.298
0.409167	21.4051	25.818	14.6123			23.4838	33.9334	29.352
0.409583	21.4346	25.4439	14.6358			23.3482	33.9054	29.341
0.41	21.3765	25.937	14.561			23.4279	33.8699	29.3282
0.410417	21.2215	25.6826	14.7121			23.6936	33.9261	29.3529
0.410833	21.3131	25.7009	14.6002			23.5321	33.9054	29.377
0.41125	21.21	25.9677	14.5162			23.5918	33.8995	29.3394
0.411667	21.3634	26.0166	14.6434			23.5074	33.8655	29.337
0.412083	21.1075	25.6405	14.7908			23.5361	33.8265	29.292
0.4125	21.3986	25.7934	14.6803			23.6727	33.9117	29.2967
0.412917	21.189	26.0047	14.7043			23.4628	33.9529	29.362
0.413333	21.3424	25.8997	14.7876			23.3819	33.9784	29.2279
0.41375	21.6739	26.3287	14.7991			23.5794	33.9943	29.2092
0.414167	21.6939	26.1209	14.7323			23.6239	34.0235	29.1879
0.414583	21.7494	25.8399	14.7118			23.4923	33.9977	29.1361
0.415	21.4619	25.5661	14.8567			23.5107	33.9496	28.9052
0.415417	21.316	25.6338	15.0094			23.4865	33.9444	29.0291
0.415833	21.232	25.9133	14.9238			23.4509	33.8829	29.1183
0.41625	21.1506	26.0813	15.0573			23.7068	33.8256	29.1861
0.416667	21.3077	25.592	14.9932			23.5536	33.8641	29.1899
0.417083	21.3619	25.5622	15.0539			23.5635	33.9088	29.134
0.4175	21.6758	25.6173	14.9295			23.6214	33.813	29.1332
0.417917	21.2911	25.5178	15.006			23.7463	33.7349	29.1736
0.418333	21.0258	25.8412	14.9392			23.7565	33.7111	29.153
0.41875	21.123	25.916	15.0714			23.7391	33.77	29.0577
0.419167	21.5681	26.2028	15.1796			24.0047	33.8768	29.2252
0.419583	21.6632	25.8192	15.1847			23.7137	33.8744	29.3002
0.42	21.3324	26.141	15.1508			23.8811	33.8782	29.3117
0.420417	21.4852	26.1204	15.0965			23.8132	33.8442	29.2469
0.420833	21.5396	25.9475	13.5972			23.8432	33.8903	29.2789
0.42125	21.23	25.9395	13.6045			23.8329	33.8785	29.2835
0.421667	21.2607	25.913	13.7239			23.7372	33.9257	29.2531
0.422083	21.4217	25.8636	13.7253			23.7018	33.826	29.3199
0.4225	21.2022	25.9144	13.6629			23.5703	33.7939	29.367
0.422917	21.4396	26.2005	13.7021			23.8968	33.8276	29.4178
0.423333	21.2381	25.7853	13.8117			23.728	33.7943	29.4661
0.42375	21.2568	26.2528	13.7951			23.8039	33.7825	29.4124
0.424167	21.1548	25.981	13.7742			23.8393	33.795	29.5203
0.424583	21.1639	25.7509	13.7192			23.9116	33.834	29.4712
0.425	21.2996	25.6816	13.7776			23.7919	33.7738	29.4105
0.425417	21.28	25.7266	13.7424			23.924	34.0132	29.484
0.425833	21.175	25.8462	13.7208			23.8809	34.16	29.4793
0.42625	21.1038	26.0243	13.7722			23.9143	34.1865	29.5488
0.426667	21.0702	26.2572	13.8673			24.063	34.1395	29.5397
0.427083	21.0756	26.1286	13.9254			23.9058	34.23	29.6733
0.4275	21.1784	25.8332	13.8104			23.7758	34.2381	29.6528
0.427917	20.9219	26.0322	13.9256			23.9627	34.2237	29.6083
0.428333	21.0112	26.2301	14.0027			23.9496	34.1845	29.6339
0.42875	21.2503	25.833	13.9433			24.0063	34.2639	29.5815
0.429167	20.9483	25.6445	13.9019			23.8818	34.2393	29.6958
0.429583	20.9672	25.8867	13.9234			23.9354	34.2652	29.6674
0.43	20.9954	26.1779	13.894			24.0347	34.3216	29.6994
0.430417	21.0273	25.7905	13.9753			24.1853	34.3328	29.9073
0.430833	20.9919	25.4393	14.0426			23.9015	34.3858	29.9076
0.43125	20.9821	25.9221	13.965			24.058	34.4163	29.9857
0.431667	20.972	25.8238	13.9506			23.9094	34.4567	29.951
0.432083	20.9554	25.5307	14.0432			23.9366	34.4284	29.8696
0.4325	21.0502	25.915	14.0076			24.0026	34.459	29.9508
0.432917	21.0114	25.6508	14.0644			24.1017	34.5384	29.8704
0.433333	21.2172	26.1889	14.0163			24.161	34.587	29.9283
0.43375	20.8944	25.9726	14.046			24.2553	34.5893	30.0258
0.434167	20.8954	25.9311	13.9657			24.1206	34.573	29.9782
0.434583	20.9416	26.0023	14.1966			24.2368	34.5455	29.9812
0.435	20.9331	26.1744	14.1902			24.0914	34.5846	30.0773
0.435417	21.0721	25.5447	14.1372			24.3105	34.629	30.0555
0.435833	21.1276	26.185	14.0961			24.3133	34.5885	30.0201
0.43625	21.585	26.2533	14.0877			24.2384	34.6724	30.0173
0.436667	21.097	26.4758	14.1689			24.1284	34.6064	30.0003
0.437083	20.7288	25.9386	14.1234			24.1135	34.6094	30.0658
0.4375	21.1399	26.4718	15.1198			24.1997	34.6289	30.1024
0.437917	20.9169	26.3499	14.4967			24.0861	34.6194	30.093
0.438333	20.902	25.7818	24.8752			24.1586	34.6598	30.0313
0.43875	21.0577	25.9892	13.9473			24.3098	34.6218	30.0126
0.439167	20.8733	26.1818	14.2485			24.2922	34.7354	30.0413
0.439583	20.7201	25.8719	14.1777			24.3826	34.7978	30.0072
0.44	20.906	25.925	14.1397			24.3914	34.7559	30.1024
0.440417	21.043	26.1208	14.157			24.2204	34.7186	30.0608
0.440833	21.0155	26.0768	14.3395			24.2218	34.7919	30.0803
0.44125	20.9574	25.7242	14.2456			24.2361	34.7505	30.1168
0.441667	20.8496	26.0731	14.3902			24.5664	34.8324	30.1791
0.442083	20.9773	26.1371	14.3035			24.5711	34.8599	30.1928
0.4425	20.8091	25.9208	14.3905			24.4264	35.0085	30.0157
0.442917	21.163	25.8127	14.3881			24.303	34.9536	30.0815
0.443333	21.0578	25.9785	14.4386			24.2849	34.9215	30.106
0.44375	20.7476	26.2074	14.4264			24.4073	34.7769	30.0829
0.444167	20.9763	26.1698	14.3464			24.436	34.7895	30.087
0.444583	21.0588	26.6658	14.3862			24.4773	34.7793	30.0968
0.445	20.85	26.2051	14.3846			24.5282	34.8043	30.2301
0.445417	20.7573	26.0328	14.334			24.6244	34.9111	30.2184
0.445833	20.9549	26.2975	14.304			24.506	34.9005	30.1503
0.44625	21.4151	26.6778	14.3462			24.6843	34.9487	30.1531
0.446667	20.9877	26.428	14.3027			24.5001	34.9383	30.217
0.447083	20.6669	26.1532	14.379			24.7096	35.0172	30.2672
0.4475	20.5469	26.2335	14.3926			24.6985	35.0962	30.2696
0.447917	21.1402	26.1457	14.4446			24.6453	35.0723	30.2022
0.448333	21.0238	26.0795	14.4093			24.6369	35.153	30.3148
0.44875	20.9377	26.0799	14.4187			24.6518	35.174	30.2847
0.449167	21.3014	26.0127	14.4293			24.45	35.1445	30.312
0.449583	20.9074	26.4516	14.3728			24.5205	35.0953	30.3306
0.45	20.6966	26.3097	14.4909			24.7204	35.0989	30.3308
0.450417	20.8699	26.0864	14.5673			24.763	35.1758	30.3939
0.450833	21.1446	26.0258	14.4587			24.6532	35.2165	30.4292
0.45125	20.9945	26.1136	14.5098			24.6358	35.2456	30.4123
0.451667	20.7362	25.827	14.597			24.6748	35.2555	30.4169
0.452083	20.6858	26.1116	14.6198			24.7034	35.2663	30.422
0.4525	20.6935	25.8253	14.6441			24.6661	35.2238	30.3845
0.452917	20.89	25.653	14.5535			24.7711	35.2319	30.3879
0.453333	20.6931	25.9973	14.567			24.7547	35.2046	30.4633
0.45375	20.6498	26.3174	14.6772			24.8044	35.2174	30.4197
0.454167	20.5776	26.1005	14.6291			24.8332	35.2513	30.4431
0.454583	20.5773	26.3823	14.6214			24.9315	35.2976	30.489
0.455	20.9405	26.3876	14.6871			24.9113	35.3246	30.5081
0.455417	20.6593	26.096	14.62			24.8413	35.2622	30.4919
0.455833	21.1855	26.5563	14.6484			24.7692	35.2945	30.4175
0.45625	21.0599	26.2368	14.6407			24.7717	35.2118	30.4166
0.456667	20.8144	26.4776	14.6188			25.0162	35.2023	30.5416
0.457083	20.8619	26.2493	14.6434			24.9866	35.3132	30.4963
0.4575	20.4839	26.3348	14.7126			24.9442	35.3966	30.5427
0.457917	20.99	25.9453	14.661			24.8712	35.4386	30.5845
0.458333	21.1289	26.148	14.6947			24.9733	35.4086	30.5526
0.45875	20.689	26.0704	14.6629			25.0451	35.4743	30.6066
0.459167	20.8427	26.4244	14.6623			25.0041	35.5122	30.6353
0.459583	20.7427	26.6948	14.7323			24.9153	35.5166	30.6149
0.46	20.9413	26.5329	14.8113			24.9307	35.5365	30.6284
0.460417	21.2914	26.2976	14.9011			24.9426	35.5547	30.6334
0.460833	20.8325	26.5084	14.7856			25.0518	35.4811	30.6488
0.46125	20.6762	26.0829	14.8285			25.0713	35.5053	30.6589
0.461667	20.6643	26.2231	14.8457			25.167	35.4388	30.6657
0.462083	20.6062	26.3473	14.844			25.0957	35.4744	30.6228
0.4625	20.926	26.1364	15.1744			25.0683	35.5722	30.6789
0.462917	20.6474	26.6308	14.6138			24.9615	35.5743	30.7138
0.463333	20.8748	26.2637	14.8528			25.0789	35.529	30.7346
0.46375	20.6131	26.5156	14.964			24.9621	35.5748	30.7642
0.464167	20.6426	26.6566	15.0299			25.0764	35.5668	30.7546
0.464583	20.5888	26.0257	14.9199			24.9798	35.4995	30.766
0.465	20.5135	26.1534	14.8567			25.0951	35.5095	30.8149
0.465417	20.6876	26.2016	14.9131			25.2155	35.5501	30.803
0.465833	20.6421	26.3527	14.9467			25.0977	35.4892	30.7778
0.46625	20.6722	26.1534	14.9263			25.3329	35.4354	30.7315
0.466667	20.5559	26.0026	15.0141			25.2558	35.3734	30.7966
0.467083	20.8533	26.0076	14.9614			25.3542	35.4556	30.7638
0.4675	20.5263	26.8717	15.0014			25.42	35.5112	30.7314
0.467917	20.5428	26.3174	15.0373			25.2634	35.626	30.8023
0.468333	20.6162	25.9207	15.0398			25.137	35.6011	30.8278
0.46875	20.3835	25.9218	14.9941			25.3147	35.6743	30.9411
0.469167	20.728	26.7357	15.0355			25.4663	35.7528	30.8824
0.469583	20.4216	26.4865	14.9785			25.3487	35.8366	30.8953
0.47	20.2784	26.0929	14.9888			25.4151	35.8956	30.8564
0.470417	20.8867	26.0129	15.0048			25.3571	35.8852	30.8931
0.470833	20.448	26.0651	14.9969			25.3745	35.8751	30.9409
0.47125	20.4931	26.0497	15.0569			25.3464	35.9177	30.9259
0.471667	20.5204	26.2631	15.1309			25.3343	35.9883	30.9313
0.472083	20.234	26.3156	15.0683			25.2734	36.0266	30.9248
0.4725	20.5098	26.3637	15.0859			25.4136	36.0074	30.8914
0.472917	20.5046	26.1714	35.8566			25.3599	35.9951	30.9389
0.473333	20.1067	26.3032	38.5763			25.3857	36.0019	30.947
0.47375	20.0435	26.1363	16.1739			25.4731	36.0454	30.9753
0.474167	20.1523	26.0706	15.3965			25.3438	36.1612	30.9513
0.474583	20.4123	26.7356	14.2074			25.5461	36.1884	30.9424
0.475	20.3895	26.4496	10.8559			25.6499	36.1909	30.9759
0.475417	20.2115	26.4653	-6.21825			25.5623	36.2612	30.9995
0.475833	20.1022	26.5118	16.5372			25.7059	36.3274	30.9623
0.47625	20.1654	26.6382	14.0313			25.5454	36.288	31.0002
0.476667	20.4533	26.3034	16.4512			25.4365	36.3584	31.0246
0.477083	20.0643	26.2574	16.4377			25.5644	36.3803	31.003
0.4775	20.1469	26.407	16.4114			25.578	36.355	31.005
0.477917	20.3882	26.4976	16.3871			25.6423	36.4126	31.0251
0.478333	20.4076	26.0916	16.5474			25.5608	36.4388	31.1213
0.47875	20.251	26.2921	16.455			25.7402	36.4541	31.074
0.479167	20.0687	26.3518	16.3198			25.4955	36.4567	31.0341
0.479583	20.0704	26.1257	-7.22189			25.6576	36.5368	31.0863
0.48	20.1757	26.3688	13.6819			25.9587	36.574	31.134
0.480417	20.3249	26.3936	-11.3579			25.7468	36.5278	31.1261
0.480833	20.4964	26.642	16.1012			25.8127	36.5428	31.1124
0.48125	20.3905	26.2738	16.4849			25.7022	36.5683	31.1088
0.481667	20.4934	26.0434	16.5936			25.6701	36.5844	31.1493
0.482083	20.4572	26.4667	16.5914			25.749	36.6543	31.1543
0.4825	20.35	26.3301	16.5355			25.8496	36.6477	31.1187
0.482917	20.2493	26.6672	15.4593			25.8039	36.6833	31.145
0.483333	20.0589	26.2406	15.2688			25.7764	36.6706	31.1671
0.48375	19.9584	25.8309	15.2297			25.8559	36.6415	31.2091
0.484167	19.8725	26.315	15.2268			25.8078	36.608	31.2187
0.484583	20.0897	26.3394	15.2362			25.7268	36.6002	31.2789
0.485	20.1108	26.4269	15.1816			25.7945	36.6757	31.2665
0.485417	20.1684	26.6663	15.3329			25.7971	36.7183	31.2431
0.485833	19.97	26.3282	15.2158			25.8641	36.74	31.2459
0.48625	20.0677	26.5098	15.2985			25.974	36.7926	31.2956
0.486667	20.3614	26.6668	15.2077			25.9375	36.8507	31.28
0.487083	20.3713	26.0652	15.3015			26.1914	36.8899	31.2868
0.4875	20.0235	26.5606	15.3949			25.952	36.9128	31.2589
0.487917	19.8826	26.6745	13.1568			26.0782	36.8742	31.3071
0.488333	19.9303	26.1058	17.244			26.2136	36.8588	31.3539
0.48875	20.2446	26.1078	13.173			26.1661	36.8817	31.3618
0.489167	20.078	26.1345	18.3529			26.166	36.9324	31.4014
0.489583	20.0476	26.47	17.0207			26.214	36.8893	31.4038
0.49	19.8786	26.4848	16.9488			26.0936	36.924	31.4426
0.490417	20.1315	26.7172	16.904			26.3056	37.0102	31.4181
0.490833	20.2571	26.4819	16.9458			26.289	37.0111	31.4054
0.49125	20.0914	26.1569	16.988			26.3051	37.0809	31.4324
0.491667	20.304	26.5049	16.9748			26.4323	37.0369	31.4358
0.492083	20.4872	26.4116	16.9939			26.3124	37.1121	31.4641
0.4925	20.2266	26.3844	17.0959			26.2191	37.1608	31.4823
0.492917	20.3419	26.2892	16.9506			26.3136	37.1735	31.4866
0.493333	20.3749	26.3198	17.0359			26.3961	37.1953	31.5393
0.49375	20.4076	26.2795	17.0679			26.2707	37.2876	31.5313
0.494167	20.5073	26.2491	16.9701			26.2612	37.3237	31.5373
0.494583	20.2744	26.5065	17.0809			26.5329	37.3081	31.5866
0.495	20.2854	26.4065	16.9967			26.5379	37.3113	31.5974
0.495417	20.59	26.7275	17.0576			26.4084	37.3811	31.5767
0.495833	20.3159	26.0937	17.0103			26.4622	37.3514	31.6054
0.49625	20.3978	26.9976	17.17			26.5577	37.359	31.6811
0.496667	20.4811	26.3539	17.1211			26.4206	37.4819	31.7491
0.497083	20.5117	26.4043	17.2993			26.5102	37.5119	31.744
0.4975	19.9337	26.1995	17.3019			26.6111	37.5387	31.7645
0.497917	20.3554	26.1646	17.0507			26.6184	37.5089	31.755
0.498333	20.1749	25.9693	17.0705			26.5932	37.5097	31.6993
0.49875	20.0993	26.5432	17.2346			26.6499	37.6191	31.6979
0.499167	19.9613	26.6154	17.3267			26.6975	37.6414	31.7311
0.499583	19.9489	26.1616	17.1495			26.7967	37.5581	31.795
0.5	20.0693	26.3454	17.1557			26.646	37.5999	31.7839
0.500417	19.9656	26.1932	17.1191			26.6466	37.6456	31.8271
0.500833	20.5521	25.9217	17.1578			26.6262	37.6872	31.8396
0.50125	20.2264	26.2196	17.2069			26.7694	37.7058	31.8336
0.501667	20.2948	26.4302	17.3184			26.9157	37.6741	31.8962
0.502083	20.4295	26.6708	17.112			26.7286	37.7461	31.9189
0.5025	20.4438	26.6287	17.1129			26.7547	37.7377	31.9397
0.502917	20.0279	26.8684	17.0726			26.9955	37.7487	31.9752
0.503333	20.0711	27.0537	17.2764			26.9067	37.7388	31.9529
0.50375	19.8898	26.725	17.1791			26.8814	37.7706	31.9414
0.504167	20.1466	26.7195	16.5			26.8734	37.8426	31.9319
0.504583	19.9775	26.6571	16.6783			26.9973	37.9076	31.9862
0.505	19.9868	26.2121	17.9545			27.0889	37.8875	32.0649
0.505417	19.9263	26.5181	32.0857			26.9964	37.9048	32.0743
0.505833	19.9241	26.4141	16.5742			27.026	38.0037	32.0485
0.50625	20.2202	26.7034	15.7709			27.041	38.0805	32.0859
0.506667	20.0162	26.3823	15.7095			26.9969	38.1249	32.107
0.507083	19.9236	26.5041	15.7035			27.1132	38.125	32.158
0.5075	20.1009	26.3755	15.766			27.0049	38.142	32.1394
0.507917	19.8483	26.2503	15.7686			27.0198	38.1301	32.1011
0.508333	19.6494	26.3564	15.7667			27.1186	38.187	32.1039
0.50875	19.6671	26.18	15.74			27.1088	38.2656	32.1421
0.509167	19.5432	26.2907	15.8381			27.1467	38.2881	32.196
0.509583	19.7211	26.2862	15.8146			27.3598	38.2502	32.2304
0.51	19.7748	26.7376	15.7607			27.3883	38.2136	32.214
0.510417	20.0921	26.6939	15.7872			27.2197	38.274	32.2552
0.510833	20.0133	26.2695	15.7479			27.322	38.2573	32.2541
0.51125	20.0936	26.424	15.8291			27.3228	38.2622	32.2565
0.511667	19.892	26.7835	15.8562			27.3113	38.3848	32.2215
0.512083	19.5592	26.371	15.7226			27.406	38.3993	32.242
0.5125	19.4922	26.1236	15.6695			27.4178	38.4594	32.2672
0.512917	19.6923	25.8558	15.6923			27.3834	38.4808	32.2877
0.513333	19.7075	26.0752	15.7555			27.4232	38.4166	32.273
0.51375	20.0802	26.3346	15.827			27.5201	38.4011	32.3433
0.514167	20.0991	26.1934	15.7303			27.3906	38.3537	32.3173
0.514583	20.1822	26.8644	15.8236			27.4427	38.4069	32.3115
0.515	19.6987	26.5008	15.7577			27.4497	38.4417	32.3046
0.515417	19.9072	26.1556	15.6914			27.555	38.5106	32.3235
0.515833	19.5516	26.2849	15.6725			27.5423	38.6055	32.3626
0.51625	19.6605	25.9908	15.7053			27.4819	38.6525	32.3567
0.516667	19.6258	26.3281	15.656			27.5774	38.6379	32.3937
0.517083	19.7507	26.3255	15.7642			27.5581	38.5952	32.3907
0.5175	19.6215	26.2636	15.7564			27.5588	38.6404	32.3638
0.517917	19.459	26.4123	15.7344			27.7583	38.7064	32.3994
0.518333	19.3908	26.2977	15.7171			27.6085	38.7017	32.5033
0.51875	19.4615	26.6159	15.7137			27.5068	38.7756	32.4835
0.519167	19.4695	26.5199	15.8368			27.6655	38.8717	32.5162
0.519583	19.7972	26.2791	15.8789			27.7601	38.8674	32.4914
0.52	19.7726	26.4702	15.7478			27.8414	38.937	32.5196
0.520417	19.6483	26.6156	15.8281			27.7374	39.002	32.5766
0.520833	19.6766	26.4113	15.8513			27.7209	38.9997	32.6133
0.52125	19.6349	26.4131	15.7355			27.8093	38.9335	32.6107
0.521667	19.6851	26.3484	15.8233			27.7217	38.9072	32.5995
0.522083	19.6296	26.6548	15.881			27.7335	38.9276	32.6129
0.5225	19.7791	26.6763	15.9081			27.8822	38.9715	32.658
0.522917	19.765	26.8271	15.8348			27.9572	39.0126	32.6345
0.523333	19.7525	27.0486	15.8819			28.0018	39.0526	32.6797
0.52375	19.8971	26.6177	15.9255			27.8824	39.052	32.7075
0.524167	19.7751	26.8473	15.9103			27.9059	39.087	32.7345
0.524583	19.4823	26.7814	15.7589			27.9425	39.1727	32.7227
0.525	19.4705	26.7427	15.9054			27.8878	39.2017	32.731
0.525417	19.551	26.455	15.9106			27.9996	39.2083	32.7777
0.525833	19.5227	26.508	15.8678			28.0861	39.2221	32.7656
0.52625	19.6603	26.877	15.8653			28.0945	39.2467	32.785
0.526667	19.6592	26.8589	15.9138			28.159	39.3054	32.8695
0.527083	19.5169	26.3544	15.9116			28.0791	39.3522	32.8396
0.5275	19.5777	26.6169	15.9396			28.1072	39.3272	32.8514
0.527917	19.68	26.5219	15.8722			28.1531	39.3617	32.8703
0.528333	19.5728	26.8378	15.9668			28.3325	39.355	32.924
0.52875	19.9113	26.7362	15.9228			28.4313	39.4174	32.9361
0.529167	19.8624	26.3657	15.8417			28.5313	39.4465	32.9924
0.529583	19.9891	26.2731	15.8682			28.3113	39.5118	32.9906
0.53	19.9541	26.5203	15.8971			28.13	39.5497	33.0172
0.530417	19.7938	26.5381	16.8862			28.2903	39.5779	33.08
0.530833	19.4417	26.6457	16.2567			28.429	39.5861	33.0842
0.53125	19.6022	26.7828	16.2265			28.4216	39.6312	33.0765
0.531667	19.7769	26.4528	16.1121			28.4501	39.6558	33.103
0.532083	19.6283	26.6053	16.3115			28.5249	39.7097	33.1916
0.5325	19.7317	26.2262	16.2173			28.4897	39.6889	33.1942
0.532917	19.512	26.926	16.2036			28.5502	39.7767	33.1697
0.533333	19.5905	26.3017	16.2648			28.505	39.8389	33.2245
0.53375	19.6725	26.3148	16.2161			28.5631	39.893	33.2114
0.534167	19.5775	26.6142	16.1505			28.7043	39.9241	33.2443
0.534583	19.4695	26.4052	16.2883			28.7681	39.9338	33.2272
0.535	19.6086	26.6381	16.1592			28.6446	39.9144	33.3366
0.535417	19.6449	26.6564	16.1917			28.5901	39.9506	33.3312
0.535833	19.4704	26.7332	16.1804			28.6596	39.9777	33.336
0.53625	19.2952	26.8249	16.2145			28.6774	40.0862	33.3409
0.536667	19.2525	26.9397	16.251			28.7608	40.0671	33.4065
0.537083	19.2057	26.9169	16.1914			28.8038	40.0907	33.4064
0.5375	19.6839	26.8048	16.2309			28.8615	40.0948	33.4533
0.537917	19.6632	26.5966	16.2443			28.8918	40.0656	33.4535
0.538333	19.7329	26.5358	16.3131			28.8909	40.1631	33.4543
0.53875	19.07	26.3838	16.1845			28.9352	40.2656	33.4495
0.539167	19.1779	26.839	16.215			28.914	40.3608	33.4554
0.539583	19.1486	26.574	16.237			28.8585	40.3332	33.5019
0.54	19.4012	26.6238	16.2777			28.8777	40.4252	33.5826
0.540417	19.4033	26.7903	16.1826			28.9169	40.402	33.5499
0.540833	18.9905	26.8289	16.2547			28.979	40.3788	33.5868
0.54125	18.9773	27.0239	16.1396			29.0921	40.3805	33.5978
0.541667	19.0049	26.8768	16.2853			29.1193	40.4062	33.5819
0.542083	19.3249	27.108	16.185			29.0641	40.4342	33.6
0.5425	19.1432	26.9719	16.1386			29.0547	40.481	33.6328
0.542917	19.1077	26.7087	16.0569			29.1065	40.4811	33.6308
0.543333	19.4434	27.0207	16.0807			29.1933	40.4631	33.6782
0.54375	19.2173	26.6856	16.2009			29.1818	40.4958	33.6532
0.544167	19.2586	26.3757	16.1958			29.0788	40.5318	33.7195
0.544583	19.1155	26.5361	16.1774			29.3409	40.5834	33.7591
0.545	19.303	26.7036	16.2042			29.2625	40.5572	33.7847
0.545417	19.3987	26.7786	16.1975			29.2954	40.596	33.8428
0.545833	19.3097	27.1456	16.1685			29.3413	40.7132	33.8176
0.54625	19.3202	26.5792	16.1949			29.3249	40.7252	33.8451
0.546667	19.2609	26.7276	16.2645			29.3386	40.7303	33.8355
0.547083	18.9937	26.5536	16.1478			29.535	40.7931	33.8354
0.5475	19.1563	27.0238	16.248			29.4268	40.7723	33.8337
0.547917	19.095	26.5906	16.2509			29.4809	40.8297	33.8686
0.548333	19.1234	26.1089	16.0573			29.5269	40.8521	33.8909
0.54875	19.1127	26.4414	16.0379			29.6514	40.859	33.9622
0.549167	19.3624	26.6281	16.1187			29.5323	40.9353	33.9576
0.549583	19.2589	26.742	16.0942			29.6505	40.979	33.9076
0.55	19.2069	26.5919	16.0578			29.6379	40.9883	33.9663
0.550417	19.1641	26.7352	16.1038			29.547	41.0573	33.9978
0.550833	18.8429	26.4195	16.0089			29.709	41.0509	34.0734
0.55125	18.9647	26.748	15.9953			29.6586	41.043	34.0368
0.551667	19.1394	26.8158	16.0384			29.7523	41.0792	34.0168
0.552083	19.0221	26.8352	16.0515			29.8434	41.1046	34.01
0.5525	19.4313	27.0568	16.0094			29.7742	41.1387	34.049
0.552917	19.0355	26.7816	16.1709			29.8095	41.1621	34.0721
0.553333	19.0399	26.4574	16.1326			29.7925	41.1963	34.091
0.55375	19.1449	26.5621	16.0346			29.7978	41.2318	34.1372
0.554167	19.5124	26.404	16.1091			29.757	41.2925	34.1702
0.554583	19.3262	26.6277	16.0759			29.8663	41.2951	34.1446
0.555	18.9724	26.9147	16.1122			29.937	41.3994	34.145
0.555417	18.8771	26.4034	16.0751			30.0338	41.3676	34.2172
0.555833	19.083	26.2511	16.2397			29.9025	41.3437	34.1933
0.55625	19.333	26.7189	16.175			29.888	41.3808	34.2252
0.556667	19.448	26.6468	16.1507			30.011	41.4287	34.2506
0.557083	18.9516	26.6333	16.1883			30.2294	41.4921	34.3085
0.5575	19.1936	26.8031	16.1284			30.1102	41.5236	34.3411
0.557917	19.5169	26.8011	16.2256			30.1415	41.5279	34.3039
0.558333	19.2226	26.6807	16.2327			30.3076	41.5494	34.3141
0.55875	19.0331	26.8018	16.1892			30.2927	41.5808	34.3338
0.559167	19.1254	26.8521	16.3024			30.1187	41.62	34.3691
0.559583	19.0055	26.4558	16.1913			30.2666	41.647	34.4507
0.56	18.9871	27.0856	16.3093			30.3195	41.7032	34.4553
0.560417	18.824	26.81	16.2793			30.2872	41.7383	34.4446
0.560833	18.7963	26.8548	16.1762			30.2253	41.7652	34.4475
0.56125	18.6916	26.9139	16.3094			30.3319	41.8186	34.5401
0.561667	18.7952	26.9818	16.2114			30.3905	41.8291	34.581
0.562083	18.9287	26.7388	16.1923			30.3331	41.9098	34.5923
0.5625	19.044	26.6517	16.1997			30.3206	41.9184	34.6012
0.562917	19.2438	26.8271	16.2021			30.3362	41.9805	34.5928
0.563333	19.0246	26.8169	16.266			30.316	41.988	34.6211
0.56375	19.0375	26.5846	16.2616			30.5472	42.0667	34.6557
0.564167	19.102	26.1849	16.2196			30.464	42.0537	34.7336
0.564583	19.101	26.7952	16.3054			30.5438	42.0275	34.7373
0.565	18.933	26.6649	16.258			30.5155	42.0929	34.7542
0.565417	19.1352	26.8788	16.287			30.6595	42.155	34.796
0.565833	19.027	26.7166	16.2256			30.6988	42.2318	34.8473
0.56625	18.7636	26.8715	16.2515			30.8131	42.2658	34.8506
0.566667	18.8017	26.8687	16.3155			30.8515	42.2953	34.8855
0.567083	19.0455	26.6935	16.3074			30.7242	42.3645	34.9147
0.5675	19.17	27.2477	16.268			30.7228	42.3814	34.9677
0.567917	19.3528	26.6242	16.2081			30.8935	42.462	35.0012
0.568333	19.1565	26.6082	16.2504			30.984	42.4169	35.0467
0.56875	19.1179	26.6218	16.2924			30.8652	42.4193	35.0569
0.569167	18.9969	26.9136	16.338			30.9591	42.454	35.0672
0.569583	19.02	26.4848	16.4551			31.0523	42.4813	35.1249
0.57	18.8369	26.5009	16.2709			31.0524	42.5274	35.1341
0.570417	18.622	26.744	16.2898			31.2187	42.5951	35.18
0.570833	18.7178	26.6266	16.3519			31.1918	42.6182	35.1597
0.57125	18.943	26.3391	16.3604			31.2766	42.6968	35.201
0.571667	19.2149	26.9189	16.3558			31.1949	42.7638	35.2284
0.572083	19.3035	26.9442	16.3749			31.19	42.8231	35.2565
0.5725	19.2517	26.6928	16.3537			31.1952	42.8328	35.3039
0.572917	19.2165	26.8012	16.3548			31.1548	42.848	35.2837
0.573333	18.6232	26.6797	16.3073			31.3956	42.9087	35.3458
0.57375	18.6478	26.8328	16.3502			31.4345	42.9176	35.3664
0.574167	18.5439	26.8211	16.2474			31.3833	42.9276	35.4048
0.574583	18.8101	26.903	16.4045			31.4063	42.996	35.4138
0.575	19.1489	27.1914	16.3464			31.474	43.0598	35.3752
0.575417	18.6658	26.7783	16.2945			31.5121	43.0739	35.3916
0.575833	18.923	26.6804	16.3029			31.5392	43.077	35.4608
0.57625	18.836	26.9639	16.4193			31.5465	43.0718	35.4654
0.576667	18.8091	26.7229	16.4218			31.5596	43.1438	35.461
0.577083	19.0045	26.9242	16.314			31.6582	43.1733	35.5194
0.5775	18.7433	26.7948	16.4663			31.7039	43.1698	35.5402
0.577917	18.6014	26.9445	16.4651			31.818	43.1878	35.5778
0.578333	18.7027	26.7587	16.3887			31.798	43.2857	35.5641
0.57875	18.8385	27.2101	16.4509			31.7047	43.3434	35.6187
0.579167	19.0647	27.2643	16.4285			31.761	43.3379	35.6851
0.579583	18.8282	27.0202	16.2125			31.8285	43.3109	35.7115
0.58	18.8682	26.7309	16.327			31.7624	43.3723	35.7156
0.580417	18.5554	26.5996	16.363			31.7481	43.4727	35.7049
0.580833	18.5604	26.6015	16.3826			31.7285	43.4841	35.6964
0.58125	18.6081	26.8384	16.4078			31.8568	43.5394	35.7734
0.581667	18.6707	26.8499	16.2721			31.7461	43.6212	35.8135
0.582083	18.7359	26.6728	16.4305			31.8889	43.6574	35.842
0.5825	18.7873	26.8022	16.4336			31.8728	43.7027	35.8243
0.582917	18.5085	26.6514	16.463			31.9335	43.6783	35.8507
0.583333	18.4256	26.5952	16.4265			32.0086	43.6948	35.9024
0.58375	18.2638	26.7927	16.3158			32.0774	43.7161	35.9419
0.584167	18.4145	26.6105	16.2972			32.2742	43.7765	35.9211
0.584583	18.4434	26.8278	16.3467			32.2195	43.8246	35.9375
0.585	18.7345	26.5953	16.3247			32.2963	43.8748	35.9414
0.585417	18.5429	26.8177	16.3474			32.2758	43.9282	35.965
0.585833	18.5414	26.7001	16.3252			32.1975	43.9629	35.9665
0.58625	18.2773	27.1768	16.2878			32.3075	43.928	36.0422
0.586667	18.2782	27.0421	16.3275			32.3311	43.9576	36.0728
0.587083	18.4962	26.8221	16.2972			32.3443	43.9772	36.1006
0.5875	18.8126	26.706	16.4239			32.4847	44.0566	36.0905
0.587917	18.3707	26.6664	16.3788			32.5121	44.1241	36.1334
0.588333	18.7385	26.772	16.4443			32.5347	44.1855	36.1517
0.58875	18.5619	26.4588	16.4392			32.4796	44.1499	36.1973
0.589167	18.3226	26.4456	16.3587			32.5633	44.1945	36.2356
0.589583	18.2735	26.7439	16.3275			32.4915	44.1895	36.2649
0.59	18.4571	27.0677	16.3886			32.4958	44.2252	36.2833
0.590417	18.3817	26.9534	16.27			32.5555	44.2706	36.287
0.590833	18.4035	27.0092	16.3694			32.5455	44.2975	36.2844
0.59125	18.5569	26.8048	16.4539			32.4757	44.3074	36.3166
0.591667	18.3795	26.8014	16.4036			32.5975	44.3491	36.3707
0.592083	18.5037	26.6918	16.3697			32.7882	44.4115	36.3888
0.5925	18.5274	26.8225	16.3412			32.8469	44.449	36.4271
0.592917	18.47	26.4107	16.2483			32.7999	44.5054	36.4651
0.593333	18.4963	26.6335	16.4025			32.8308	44.525	36.4969
0.59375	18.206	26.6181	16.4007			32.8327	44.5732	36.4892
0.594167	18.3825	27.0535	16.2866			32.8114	44.7104	36.5357
0.594583	18.3752	26.3348	16.369			32.9001	44.7944	36.5647
0.595	18.5562	26.7249	16.3946			33.0052	44.831	36.6002
0.595417	18.4383	27.0461	16.3539			32.9201	44.8492	36.6313
0.595833	18.2175	26.9816	16.3565			33.1417	44.8339	36.6613
0.59625	18.1861	26.7865	16.4548			33.2872	44.9112	36.6744
0.596667	18.292	27.1129	16.3785			33.2548	44.9602	36.7153
0.597083	18.4355	27.0025	16.3452			33.2399	44.9774	36.7618
0.5975	18.3294	26.9615	16.3266			33.1588	44.9104	36.7845
0.597917	18.2653	26.9257	16.3597			33.2249	44.9877	36.7861
0.598333	18.4121	27.1281	16.401			33.3143	45.057	36.8043
0.59875	18.6292	26.7155	16.4012			33.2615	45.1671	36.8868
0.599167	18.9733	26.9932	16.4559			33.323	45.2052	36.8749
0.599583	18.5128	26.6325	16.4031			33.4118	45.2123	36.9085
0.6	18.2118	26.5828	16.319			33.4361	45.2532	36.9483
0.600417	18.3601	26.619	16.4454			33.4487	45.3346	36.9751
0.600833	18.7465	26.7887	16.4863			33.531	45.3401	37.0151
0.60125	18.62	26.9363	16.3518			33.5074	45.3341	37.0332
0.601667	18.3536	26.6764	16.3627			33.6431	45.3722	37.062
0.602083	18.4363	26.9361	16.3105			33.5574	45.3711	37.0909
0.6025	18.3391	27.0701	16.3532			33.7494	45.5029	37.1521
0.602917	18.1447	27.0135	16.4655			33.719	45.5489	37.2196
0.603333	18.1597	26.999	16.4318			33.6832	45.5876	37.2228
0.60375	18.3067	27.039	16.3866			33.7213	45.6306	37.249
0.604167	18.3181	26.7705	16.4827			33.8562	45.7238	37.2911
0.604583	18.3708	26.692	16.3797			33.8157	45.6767	37.3096
0.605	18.2201	26.8355	16.4217			33.7953	45.7408	37.3317
0.605417	18.2221	26.4184	16.4461			33.8815	45.7798	37.4047
0.605833	18.3456	26.577	16.3651			34.1342	45.8624	37.4417
0.60625	18.5739	26.9332	16.0915			34.1544	45.8995	37.4753
0.606667	18.3723	26.9629	15.7851			34.1424	45.9628	37.4992
0.607083	18.3132	26.8563	15.9143			34.1776	45.9767	37.5052
0.6075	18.1627	26.8763	15.9257			34.1756	45.979	37.5702
0.607917	18.132	26.7088	16.0109			34.205	46.0197	37.6111
0.608333	18.241	26.5774	16.0591			34.2518	46.0145	37.6166
0.60875	18.248	26.8745	16.116			34.2574	46.0603	37.6451
0.609167	18.3109	26.8982	16.1147			34.2326	46.1154	37.6577
0.609583	18.2343	26.5328	16.1396			34.4243	46.176	37.6911
0.61	18.2056	26.6701	15.9931			34.3957	46.2178	37.7479
0.610417	18.1387	27.1329	16.0161			34.497	46.3046	37.7908
0.610833	17.941	27.3063	16.0458			34.6433	46.3597	37.7996
0.61125	18.3055	27.5027	15.9563			34.6266	46.3835	37.8033
0.611667	18.3989	27.1995	16.0621			34.7214	46.4727	37.8079
0.612083	18.2387	26.5439	16.0025			34.6861	46.5322	37.8576
0.6125	18.2431	26.8124	16.001			34.6916	46.5855	37.9134
0.612917	18.1659	27.1091	16.094			34.8087	46.5684	37.9092
0.613333	17.852	26.9388	16.172			34.8417	46.6433	37.9563
0.61375	17.991	26.8127	16.1761			34.7679	46.7475	37.9734
0.614167	17.8241	26.653	16.1239			34.8916	46.7571	38.0098
0.614583	18.175	26.6818	16.0995			34.9103	46.7936	38.0402
0.615	17.9086	26.7449	16.1366			34.8999	46.75	38.0268
0.615417	18.1204	26.6504	16.2358			34.9472	46.7892	38.0806
0.615833	18.1148	27.1945	16.0763			35.0691	46.8388	38.1523
0.61625	18.1328	27.0814	16.0687			35.1826	46.948	38.1566
0.616667	17.6807	27.1771	16.0407			35.0091	46.9161	38.1731
0.617083	17.7665	26.9873	16.0233			35.0501	46.9531	38.1881
0.6175	17.9625	26.8263	16.0643			35.0984	47.0168	38.2436
0.617917	18.1141	27.216	16.058			35.1239	47.0266	38.2495
0.618333	17.9301	26.8832	16.1488			34.9885	47.0646	38.2767
0.61875	17.9573	26.9548	16.1272			35.0992	47.1537	38.3114
0.619167	17.8897	26.6371	16.1028			35.1412	47.1664	38.344
0.619583	17.8919	26.6616	16.1489			35.3616	47.2276	38.3424
0.62	18.0783	27.0051	16.0932			35.3326	47.1944	38.3646
0.620417	18.0152	27.2315	16.0957			35.4884	47.2619	38.4184
0.620833	18.0431	27.0425	16.1645			35.5999	47.3308	38.4325
0.62125	18.1238	27.172	16.1441			35.5986	47.4025	38.5018
0.621667	17.9485	26.7862	16.0742			35.6492	47.4223	38.5402
0.622083	17.8497	26.9504	16.0842			35.5412	47.4981	38.5808
0.6225	17.5455	26.9792	16.0322			35.5696	47.4939	38.5888
0.622917	17.8163	27.0302	16.1839			35.6727	47.5782	38.6042
0.623333	17.9456	26.9937	16.2212			35.702	47.5782	38.6264
0.62375	17.6557	26.6729	16.1157			35.7029	47.5558	38.6824
0.624167	17.709	27.2511	16.101			35.7584	47.6707	38.6902
0.624583	17.8106	27.0384	16.1133			35.8026	47.7442	38.7473
0.625	17.9811	26.7904	16.0568			35.9123	47.8328	38.7377
0.625417	17.8473	26.9972	16.0864			35.8668	47.8845	38.7552
0.625833	17.8342	27.1807	16.0602			35.9348	47.9102	38.7663
0.62625	17.7408	27.3435	16.0733			36.016	47.9664	38.8072
0.626667	17.8191	26.8945	16.0759			36.1087	48.0446	38.8661
0.627083	17.5398	26.9207	16.125			36.0741	48.0414	38.9235
0.6275	18.006	26.8944	17.7315			36.1299	48.0863	38.9569
0.627917	17.6654	26.7238	17.0613			36.0138	48.1103	38.9706
0.628333	17.5895	26.6892	16.7449			36.1797	48.1377	38.994
0.62875	17.6119	26.6894	16.9592			36.1092	48.1449	39.032
0.629167	17.6835	26.926	16.8955			36.2579	48.1945	39.0434
0.629583	17.871	27.057	16.8056			36.187	48.2468	39.0473
0.63	17.8833	26.7722	16.7743			36.2962	48.3218	39.1321
0.630417	17.624	26.9563	16.6672			36.3983	48.3639	39.1574
0.630833	17.6126	26.693	16.7489			36.4296	48.4363	39.1885
0.63125	17.6821	26.7265	16.774			36.4236	48.5193	39.2154
0.631667	17.7044	26.929	16.7023			36.4584	48.56	39.2494
0.632083	17.6894	26.6876	16.8143			36.4183	48.6054	39.2832
0.6325	18.0188	26.9031	16.8586			36.4985	48.6847	39.309
0.632917	17.9169	26.7879	16.8053			36.6364	48.7354	39.346
0.633333	17.7745	26.6953	16.7547			36.7318	48.775	39.3805
0.63375	17.7278	26.7816	16.8226			36.8519	48.8644	39.3887
0.634167	17.7936	26.7785	16.4428			36.7721	48.9567	39.457
0.634583	17.8547	26.8764	28.344			36.7092	48.9289	39.5004
0.635	18.0132	26.8689	17.9336			36.863	48.9265	39.5266
0.635417	18.0064	27.0205	18.1734			36.9831	48.966	39.5578
0.635833	17.9484	26.9985	18.2049			37.1669	48.9924	39.6117
0.63625	17.8348	26.9813	18.2767			36.9826	49.0673	39.6478
0.636667	17.863	26.5727	18.2701			37.0094	49.1188	39.7107
0.637083	17.9207	27.0971	18.0897			36.9813	49.2365	39.7583
0.6375	17.8068	26.9751	18.8125			37.1863	49.2572	39.7391
0.637917	17.8133	26.602	12.5396			37.1606	49.2853	39.7773
0.638333	17.6395	26.704	18.196			37.2387	49.3958	39.8047
0.63875	17.6144	26.8315	18.1779			37.3708	49.4302	39.8443
0.639167	17.7736	26.9792	18.0553			37.3127	49.5163	39.9163
0.639583	18.0046	26.9474	18.2902			37.3552	49.5631	39.9109
0.64	17.87	26.8757	18.33			37.6322	49.5936	39.9207
0.640417	17.8296	26.9726	18.3509			37.6439	49.6375	39.9751
0.640833	17.5856	27.1479	18.2323			37.5926	49.6466	40.0051
0.64125	17.7719	27.128	18.3131			37.6927	49.7474	40.0849
0.641667	17.7856	27.3369	18.2807			37.6727	49.8407	40.0835
0.642083	17.7582	26.9654	18.3664			37.6454	49.8825	40.1111
0.6425	17.8905	26.7743	18.2845			37.6808	49.9521	40.1811
0.642917	17.6322	27.3167	18.2513			37.7637	50.0373	40.1982
0.643333	17.6294	27.3762	18.4792			37.9138	50.0831	40.2262
0.64375	17.8219	26.9449	18.4468			38.0581	50.1053	40.2909
0.644167	17.5496	26.7964	18.2921			38.0322	50.0993	40.3061
0.644583	17.5593	26.978	18.3301			38.0765	50.1833	40.3154
0.645	17.5936	26.7928	16.664			38.1366	50.2334	40.3821
0.645417	17.8668	26.8657	16.7576			38.2893	50.2475	40.4388
0.645833	17.5328	26.9924	16.7401			38.3449	50.3081	40.4623
0.64625	17.5635	26.7428	16.7694			38.0708	50.3782	40.4896
0.646667	17.4255	26.4522	16.7156			38.0189	50.4303	40.5248
0.647083	17.6109	26.4574	16.7399			38.2242	50.4773	40.555
0.6475	17.8587	27.0906	16.7939			38.1711	50.5187	40.5454
0.647917	18.117	27.1009	16.7555			38.255	50.554	40.5826
0.648333	17.7373	26.7375	16.7343			38.1941	50.6506	40.6399
0.64875	17.447	26.9437	16.7091			38.3752	50.6943	40.6616
0.649167	17.5529	26.6758	16.6784			38.5075	50.7697	40.7239
0.649583	17.7201	26.8645	16.7763			38.4744	50.8029	40.7649
0.65	17.5044	26.7334	16.6469			38.5061	50.8507	40.7343
0.650417	17.5543	26.6539	16.6342			38.6331	50.9044	40.7569
0.650833	17.4517	26.9331	16.7507			38.6373	50.8791	40.828
0.65125	17.5255	26.7094	16.6726			38.6507	50.9607	40.8521
0.651667	17.7376	26.6765	16.5784			38.823	51.0138	40.8881
0.652083	17.3984	26.7143	16.649			38.6882	51.0985	40.8479
0.6525	17.5071	26.8437	16.6293			38.7751	51.1905	40.894
0.652917	17.5376	26.9607	16.5901			38.7889	51.2521	40.9772
0.653333	17.2396	26.8626	16.5512			39.0077	51.3276	41.0097
0.65375	17.2402	27.03	16.6345			39.0566	51.3688	41.0391
0.654167	17.3179	27.2094	16.6796			39.0802	51.3738	41.0551
0.654583	17.2504	26.9901	16.6649			39.1318	51.4094	41.0606
0.655	17.7668	26.6727	16.6392			39.0025	51.3941	41.1002
0.655417	17.7478	26.6249	16.5476			39.2402	51.4576	41.1456
0.655833	17.5577	26.6499	16.5608			39.2756	51.5686	41.1643
0.65625	17.3681	26.8837	16.5428			39.3592	51.6046	41.2136
0.656667	17.3053	27.1865	16.6133			39.3464	51.6579	41.2002
0.657083	17.0802	26.7342	16.6052			39.4457	51.7135	41.2351
0.6575	17.1928	26.5622	16.6048			39.5063	51.7626	41.2735
0.657917	17.1026	27.095	16.6041			39.5472	51.8612	41.302
0.658333	17.1468	26.9386	16.5692			39.4704	51.8819	41.334
0.65875	17.3148	27.2624	16.6012			39.4747	51.9678	41.3886
0.659167	17.1848	27.0174	16.619			39.5826	51.9999	41.4163
0.659583	17.1628	26.9424	16.5588			39.699	52.0912	41.4421
0.66	17.1792	27.173	16.6655			39.6809	52.1241	41.4556
0.660417	17.0305	27.1586	16.628			39.8207	52.1958	41.4987
0.660833	17.2789	26.9247	16.56			39.6922	52.2006	41.5378
0.66125	17.3146	27.0767	16.573			39.9101	52.2266	41.5614
0.661667	17.2837	27.2237	16.6466			39.8976	52.2465	41.5764
0.662083	17.3541	27.0392	16.5365			39.8629	52.3068	41.6148
0.6625	17.4843	27.021	16.4995			40.0749	52.3822	41.6566
0.662917	17.3021	27.282	16.5446			40.0134	52.5105	41.7261
0.663333	17.3617	27.0095	16.4965			40.0651	52.5789	41.7486
0.66375	17.2568	27.1548	16.6337			40.1942	52.6117	41.7816
0.664167	17.1418	26.8774	16.6696			40.2697	52.6413	41.8086
0.664583	17.2955	27.0066	16.7201			40.3098	52.6914	41.8027
0.665	17.2024	26.6159	16.6199			40.1729	52.7365	41.8382
0.665417	17.3429	27.065	16.5078			40.3768	52.8373	41.8877
0.665833	17.3506	27.1937	16.4654			40.3858	52.9015	41.9021
0.66625	17.3215	27.1273	16.5366			40.4135	52.9224	41.9652
0.666667	17.3799	27.2579	16.5869			40.5297	53.0055	42.0459
0.667083	17.2704	26.9321	16.518			40.5649	52.9942	42.0721
0.6675	17.3525	26.9721	16.4064			40.6567	53.1201	42.0828
0.667917	17.29	26.8481	16.543			40.7514	53.1364	42.1046
0.668333	17.6714	26.9764	16.4801			40.6911	53.1848	42.1501
0.66875	17.7367	27.1091	16.4305			40.7655	53.349	42.1758
0.669167	17.5815	27.126	16.5157			40.7991	53.3495	42.2357
0.669583	17.3702	26.858	16.3336			40.7886	53.4384	42.2563
0.67	17.1882	26.9321	16.5027			40.8859	53.5528	42.2887
0.670417	17.2686	26.593	16.523			40.8778	53.5515	42.3407
0.670833	17.2111	27.0046	16.5215			40.852	53.6113	42.3759
0.67125	17.3408	27.0414	16.493			40.9188	53.6554	42.4105
0.671667	17.4964	26.9673	16.5228			41.0007	53.7082	42.4365
0.672083	17.1865	26.955	16.4917			41.1467	53.7665	42.488
0.6725	17.2611	26.9473	16.6235			41.2732	53.7989	42.5417
0.672917	17.3228	26.8886	16.553			41.2073	53.8446	42.5727
0.673333	17.3036	26.8976	16.4593			41.3549	53.9379	42.6168
0.67375	17.2608	27.0049	16.5458			41.5156	54.0493	42.6608
0.674167	17.1762	26.5568	16.6315			41.5405	54.1183	42.6873
0.674583	17.02	26.7826	16.5482			41.4406	54.1722	42.7366
0.675	17.0966	26.9164	16.6164			41.6083	54.2838	42.7674
0.675417	17.0008	26.8582	16.5411			41.5638	54.3055	42.8222
0.675833	17.3764	26.7595	16.523			41.5369	54.4436	42.8434
0.67625	17.349	26.9199	16.6084			41.6283	54.4932	42.8709
0.676667	17.3545	26.734	16.504			41.7124	54.4989	42.922
0.677083	17.1438	26.608	16.495			41.8573	54.5609	42.9999
0.6775	16.9967	26.6079	16.5433			41.9507	54.5836	43.0157
0.677917	17.2034	26.643	16.5879			41.8755	54.6835	43.0405
0.678333	17.3717	26.822	16.5351			41.9205	54.6668	43.0897
0.67875	17.1726	27.0883	16.499			42.0648	54.7873	43.0988
0.679167	17.0374	26.8327	16.3946			42.148	54.9172	43.1494
0.679583	17.0054	26.9947	16.466			42.3302	55.0181	43.202
0.68	17.0661	26.8193	16.5029			42.0516	55.0755	43.2227
0.680417	17.029	26.7161	16.4992			42.1639	55.1038	43.2731
0.680833	17.158	26.9275	16.3961			42.2806	55.2189	43.318
0.68125	17.0275	26.9929	16.4308			42.3215	55.2778	43.368
0.681667	17.1911	26.9193	16.4709			42.398	55.3507	43.3872
0.682083	17.2453	27.1674	16.394			42.3368	55.4035	43.395
0.6825	17.1492	27.0593	16.4446			42.4431	55.4967	43.435
0.682917	17.2271	27.0028	16.4794			42.5732	55.5134	43.4861
0.683333	17.252	26.8363	16.4239			42.4698	55.5419	43.5123
0.68375	17.3436	27.0004	16.3551			42.4333	55.6365	43.5794
0.684167	17.3677	27.3907	16.3768			42.6769	55.7206	43.6075
0.684583	17.0924	26.8836	16.4071			42.637	55.8511	43.6342
0.685	16.9135	26.9074	16.4658			42.7411	55.9175	43.6674
0.685417	16.9852	26.9193	16.2849			42.8337	55.9521	43.6876
0.685833	16.9236	26.6438	16.3227			42.8681	56.0471	43.7108
0.68625	17.359	26.9397	16.3832			42.7723	56.1179	43.7437
0.686667	17.0998	26.7877	16.3265			43.0418	56.1203	43.7588
0.687083	17.2578	26.7339	16.4255			43.0999	56.1833	43.7853
0.6875	17.059	27.1383	16.3668			43.2304	56.242	43.7951
0.687917	16.8953	27.2833	16.3545			43.2157	56.2867	43.8439
0.688333	16.8659	26.8959	16.2983			43.4134	56.3508	43.8884
0.68875	16.9966	26.9648	16.3344			43.4674	56.4155	43.9109
0.689167	16.8939	27.0889	16.3754			43.4474	56.5245	43.9303
0.689583	16.8293	26.9717	16.3754			43.5984	56.6147	43.9854
0.69	16.9279	26.9684	16.3102			43.5514	56.6929	44.0279
0.690417	16.9968	26.9563	16.4264			43.5465	56.7558	44.0396
0.690833	17.0231	26.6069	16.406			43.5419	56.7744	44.0539
0.69125	17.2213	27.0504	16.378			43.6053	56.8408	44.0665
0.691667	17.1299	27.2121	16.3431			43.7242	56.9185	44.0776
0.692083	16.9549	26.7291	16.3304			43.7218	56.9497	44.1196
0.6925	16.8564	26.7387	16.3097			43.9187	57.0177	44.1632
0.692917	17.0401	26.9511	16.2588			43.8873	57.0881	44.185
0.693333	16.8875	26.8109	16.2964			44.1452	57.1072	44.2479
0.69375	16.8255	27.1567	16.3058			43.9519	57.1835	44.2558
0.694167	16.7169	26.994	16.4224			43.8649	57.2079	44.2805
0.694583	16.781	26.9355	16.2366			44.2245	57.2959	44.3167
0.695	16.7807	26.8933	16.3389			44.1348	57.2616	44.3586
0.695417	16.9119	26.7038	16.2256			44.2269	57.3882	44.3872
0.695833	16.9145	26.9893	16.2833			44.3366	57.4094	44.4067
0.69625	16.8722	26.8151	16.2102			44.5194	57.4721	44.4148
0.696667	16.7835	26.8048	16.2952			44.4653	57.5893	44.4579
0.697083	16.4077	27.0417	16.1981			44.4863	57.6848	44.503
0.6975	16.6868	26.6562	16.293			44.5742	57.7917	44.5452
0.697917	16.8893	27.174	16.2616			44.5598	57.8903	44.5401
0.698333	16.651	26.9516	16.2733			44.6225	57.9351	44.5574
0.69875	16.8213	26.9315	16.2091			44.5877	57.9861	44.6104
0.699167	17.0767	26.9901	16.1667			44.6127	58.0311	44.6306
0.699583	17.1558	27.1018	16.2556			44.9204	58.1399	44.657
0.7	16.9313	26.8336	16.2488			44.9404	58.1897	44.6987
0.700417	16.6386	27.0979	16.2518			44.9139	58.2405	44.7321
0.700833	16.8383	27.2863	16.2749			44.9708	58.2808	44.7562
0.70125	16.756	26.9146	16.3458			45.0819	58.4744	44.8179
0.701667	17.0336	26.9143	16.2931			45.2227	58.5217	44.8675
0.702083	16.9393	27.011	16.2427			45.0491	58.5224	44.8872
0.7025	16.6547	27.0171	16.2649			45.1835	58.6375	44.902
0.702917	16.6076	27.0035	16.2141			45.1993	58.699	44.9581
0.703333	16.8176	26.9748	16.2268			45.4297	58.6989	45.0163
0.70375	16.6626	26.818	16.3238			45.4792	58.8073	45.054
0.704167	16.5556	26.7204	16.2713			45.5338	58.9307	45.0572
0.704583	16.564	26.8282	16.3249			45.4878	58.9692	45.0861
0.705	16.6913	26.8197	16.386			45.6377	59.0613	45.1054
0.705417	16.8246	26.8348	16.2996			45.6061	59.113	45.1306
0.705833	16.8137	26.7915	16.2541			45.7356	59.2459	45.1696
0.70625	16.9124	26.5314	16.3209			45.757	59.3392	45.1738
0.706667	16.937	26.8083	16.1928			45.7733	59.3747	45.2424
0.707083	16.9875	26.8612	16.2743			45.9713	59.4184	45.2957
0.7075	16.8638	26.9886	16.2454			46.0631	59.4713	45.3204
0.707917	16.7811	26.846	16.2028			46.0206	59.6238	45.3675
0.708333	16.9658	26.9327	16.2172			46.049	59.6552	45.3906
0.70875	16.8364	26.8526	16.1933			46.3019	59.7531	45.445
0.709167	16.5982	26.9306	16.3211			46.4116	59.8743	45.5138
0.709583	16.6186	26.8976	16.3908			46.3943	60.0317	45.5258
0.71	16.5085	26.9087	16.2673			46.4642	60.061	45.5707
0.710417	16.5374	26.5688	16.2552			46.4749	60.0843	45.5958
0.710833	17.0618	27.1771	16.2546			46.6493	60.1939	45.6095
0.71125	16.9082	27.0809	16.2873			46.7189	60.3196	45.671
0.711667	16.7425	26.6249	16.3102			46.608	60.3472	45.7058
0.712083	16.9732	26.6786	16.2126			46.6919	60.3659	45.7665
0.7125	16.8089	26.8311	16.2999			46.876	60.4678	45.814
0.712917	16.7362	26.7854	16.2831			46.998	60.5096	45.8252
0.713333	16.451	26.7273	16.2912			46.9384	60.6322	45.8753
0.71375	16.6919	27.167	16.2324			46.9924	60.6498	45.8879
0.714167	16.9093	27.2409	16.2869			47.0637	60.756	45.9154
0.714583	17.1253	27.0414	16.1437			47.2631	60.8913	45.9776
0.715	16.807	26.8138	16.157			47.3066	60.9971	46.0252
0.715417	16.6948	26.8606	16.2074			47.2273	61.0772	46.0621
0.715833	16.6507	26.7657	16.3007			47.5925	61.1531	46.0906
0.71625	16.9507	26.7615	16.227			47.5771	61.2596	46.1151
0.716667	17.0053	26.7338	16.2431			47.564	61.3379	46.1553
0.717083	17.1909	26.779	16.1601			47.5892	61.3973	46.2117
0.7175	16.8797	26.8339	16.1825			47.6389	61.3382	46.2388
0.717917	16.5367	26.783	16.1746			47.8722	61.4683	46.2912
0.718333	16.5131	26.9923	16.1323			47.7592	61.5644	46.3108
0.71875	16.7186	26.9588	16.0874			47.7056	61.688	46.3382
0.719167	17.0041	27.104	16.2722			47.6925	61.7646	46.3687
0.719583	17.0726	26.8861	16.2064			47.8303	61.8109	46.3633
0.72	16.903	26.9871	16.1093			48.0763	61.8973	46.4321
0.720417	16.7166	26.9606	16.1441			48.2196	62.0102	46.4601
0.720833	16.6149	26.8567	16.1158			48.3315	62.0849	46.4662
0.72125	16.5903	26.8727	16.1434			48.3598	62.2043	46.5402
0.721667	16.6091	26.6397	16.1641			48.3666	62.2805	46.5571
0.722083	16.5133	26.8861	16.1596			48.4679	62.3057	46.5655
0.7225	16.6738	26.921	16.1642			48.5896	62.3976	46.6204
0.722917	16.6785	26.7142	16.0715			48.6936	62.4772	46.6322
0.723333	16.7862	26.7662	16.1514			48.6513	62.4648	46.6887
0.72375	16.5816	26.7487	16.1792			48.7126	62.5466	46.7259
0.724167	16.4752	26.8945	16.195			48.7712	62.7672	46.7313
0.724583	16.5032	26.6742	16.2053			48.8148	62.8338	46.7428
0.725	16.3088	26.6099	16.1506			48.7979	62.9221	46.7598
0.725417	16.267	26.7637	16.1539			48.9397	63.0626	46.7822
0.725833	16.4645	26.7844	16.1369			49.0184	63.1111	46.7897
0.72625	16.44	26.9603	16.0844			49.0365	63.123	46.8001
0.726667	16.4176	26.8255	16.1497			49.0331	63.2498	46.8167
0.727083	16.3396	26.9189	16.0782			49.227	63.2951	46.8122
0.7275	16.3037	27.0846	16.0821			49.2919	63.4087	46.8367
0.727917	16.4724	26.9284	16.0788			49.3964	63.4242	46.7993
0.728333	16.547	27.0747	16.0572			49.5292	63.5525	46.8279
0.72875	16.5303	27.0883	16.141			49.541	63.6773	46.8525
0.729167	16.5289	26.8039	16.1144			49.5407	63.7541	46.8325
0.729583	16.3446	26.7744	16.1411			49.6277	63.8432	46.6827
0.73	16.2981	26.4566	16.1276			49.7064	63.9342	46.1803
0.730417	16.2584	26.6944	16.1064			49.819	64.0429	46.6862
0.730833	16.317	26.7369	16.0368			49.9165	64.0825	47.4149
0.73125	16.3564	26.8286	16.1809			49.9436	64.2103	47.4318
0.731667	16.4818	27.248	16.1695			49.9184	64.4319	47.2883
0.732083	16.4489	26.7944	16.1563			49.9505	64.4663	47.2492
0.7325	16.4761	26.9305	16.2007			50.1876	64.5347	47.2525
0.732917	16.4976	26.7676	16.233			50.1403	64.6388	47.2205
0.733333	16.2884	26.703	16.1294			50.1788	64.6824	47.2076
0.73375	16.3989	26.9006	16.01			50.3735	64.7971	47.2371
0.734167	16.2717	27.0955	16.0848			50.3664	64.9091	47.3251
0.734583	16.1464	26.9149	15.9992			50.4394	64.9372	47.334
0.735	16.3861	27.1566	16.1654			50.3473	64.9768	47.3279
0.735417	16.3626	26.94	16.1834			50.686	65.0816	47.321
0.735833	16.7095	26.9216	16.1646			50.7575	65.1617	47.359
0.73625	16.3639	26.7619	16.121			50.8841	65.283	47.4678
0.736667	16.2727	26.6498	16.0679			50.8362	65.3801	47.4459
0.737083	16.4257	26.9644	16.049			50.7052	65.505	47.3399
0.7375	16.2992	26.6969	16.0792			50.9532	65.5851	47.3218
0.737917	16.157	26.6331	16.1567			51.0763	65.63	47.1132
0.738333	16.3232	26.6692	16.2048			51.1252	65.7853	47.0699
0.73875	16.5227	26.6752	16.1327			51.1706	65.8427	47.0062
0.739167	16.5037	26.5826	16.0577			51.2398	65.9344	46.88
0.739583	16.439	26.7079	16.1045			51.3749	66.0247	46.278
0.74	16.2885	26.4111	16.0739			51.4007	66.1255	46.0907
0.740417	16.5393	26.4347	16.0425			51.3726	66.1971	46.0427
0.740833	16.7523	26.774	16.0685			51.6553	66.2035	46.048
0.74125	16.4631	26.6726	15.9725			51.666	66.2844	45.0656
0.741667	16.2594	26.658	15.927			51.6967	66.3888	48.996
0.742083	16.6187	26.8214	16.048			51.7606	66.5312	49.1507
0.7425	16.5726	26.9265	15.979			51.8511	66.7107	48.3602
0.742917	16.3947	27.0824	16.0779			52.0559	66.8232	47.7484
0.743333	16.3649	26.9148	16.1246			52.057	66.8268	47.528
0.74375	16.3841	26.8294	16.0492			52.0193	66.9742	47.3602
0.744167	16.744	26.8875	15.9862			52.2519	67.1609	46.9428
0.744583	16.9822	26.7298	16.0836			52.3457	67.2746	46.74
0.745	16.9032	26.6173	16.0495			52.346	67.394	46.5838
0.745417	16.4623	26.7567	15.9363			52.4998	67.4855	46.181
0.745833	16.4343	26.4734	15.9494			52.626	67.5671	46.3488
0.74625	16.351	26.5466	16.0399			52.6574	67.6807	46.3349
0.746667	16.0804	26.7304	15.9893			52.7304	67.7866	47.8866
0.747083	16.0375	26.9117	15.949			52.793	67.8891	48.9151
0.7475	16.177	26.4872	16.0282			52.8762	67.9677	49.6574
0.747917	16.2977	26.6788	16.0068			52.9257	68.044	49.8848
0.748333	16.3163	26.6655	15.9386			53.1925	68.2007	49.6539
0.74875	16.3099	26.8005	15.9709			53.2737	68.2777	49.3735
0.749167	16.4139	26.8572	15.914			53.2486	68.3473	49.293
0.749583	16.3648	26.931	15.8523			53.2935	68.5519	49.5063
0.75	16.3233	27.0313	15.9173			53.5446	68.5296	49.6608
0.750417	16.5141	26.9342	15.9816			53.543	68.665	49.5164
0.750833	16.2561	26.7534	15.9331			53.6023	68.8342	49.617
0.75125	16.2208	26.4774	15.9715			53.7753	68.9619	49.7152
0.751667	16.0849	26.6658	15.9627			53.8809	69.012	49.6634
0.752083	16.1164	26.8748	15.8778			53.8139	69.0715	49.9059
0.7525	16.1413	26.6963	15.9058			53.9704	69.263	49.8322
0.752917	16.1827	26.535	15.8926			53.9727	69.3605	49.8117
0.753333	16.2622	26.4926	15.9139			54.2041	69.47	49.787
0.75375	16.3427	26.8281	15.9087			54.2858	69.5085	49.421
0.754167	16.2692	26.6492	15.9004			54.4092	69.5403	49.7174
0.754583	16.1787	26.9279	15.8523			54.4677	69.6892	50.5063
0.755	16.2209	26.9301	15.8736			54.6024	69.8749	50.3396
0.755417	16.5285	26.4234	15.9198			54.6654	69.9592	50.3496
0.755833	16.0453	26.8812	15.9384			54.6199	70.1058	50.3978
0.75625	16.063	26.7062	15.9356			54.8232	70.1812	50.4848
0.756667	15.9897	26.5818	15.8897			54.8668	70.2598	50.5767
0.757083	16.0291	26.4636	15.9311			54.9878	70.3633	50.5537
0.7575	15.8205	26.6888	15.8242			54.9388	70.4081	50.5948
0.757917	16.197	26.6887	15.8095			55.044	70.5161	50.591
0.758333	16.0956	26.6276	15.9071			55.3396	70.6634	50.6261
0.75875	15.7916	26.4326	15.9199			55.4657	70.8118	50.5896
0.759167	15.8136	26.6534	15.9184			55.4689	70.9726	50.6027
0.759583	16.1725	26.7112	15.8687			55.4867	71.0791	50.7645
0.76	16.0411	26.5913	15.8279			55.5277	71.1714	50.7735
0.760417	16.037	26.755	15.93			55.6824	71.3377	50.895
0.760833	16.0445	26.854	15.9294			55.7514	71.4148	50.9267
0.76125	16.1884	26.7515	15.9051			55.7239	71.5434	51.0272
0.761667	16.0058	26.8706	15.9664			55.7798	71.7275	51.0375
0.762083	15.7669	26.5332	15.8805			55.9656	71.8565	51.0442
0.7625	15.6826	26.4028	15.8901			56.0868	71.9501	51.0653
0.762917	16.1157	26.5348	15.8936			56.1403	72.0267	51.052
0.763333	16.1199	26.9114	15.9525			56.22	72.1306	51.4448
0.76375	15.9449	26.497	15.8587			56.3201	72.2748	51.5316
0.764167	15.9656	26.687	15.9136			56.5103	72.3551	51.497
0.764583	16.3374	27.0724	15.8562			56.5745	72.5819	51.5116
0.765	16.1495	26.7834	15.8465			56.634	72.6783	51.5388
0.765417	15.9106	26.7469	15.8956			56.6545	72.7084	51.6114
0.765833	15.9608	26.98	15.9609			56.7883	72.8584	51.619
0.76625	15.9256	26.7202	15.9642			56.8755	72.9318	51.6442
0.766667	16.156	26.6619	15.8541			56.8593	73.0767	51.6268
0.767083	16.2982	26.9683	15.971			57.1065	73.167	51.5491
0.7675	16.0092	26.5951	15.8663			57.37	73.2481	51.3473
0.767917	15.9231	26.6079	15.8064			57.3054	73.4248	51.9637
0.768333	16.0839	26.5797	15.7706			57.2873	73.5822	52.0821
0.76875	16.1838	26.7885	15.8121			57.4052	73.7736	52.0787
0.769167	15.8485	26.6651	15.8459			57.5542	73.8471	52.0942
0.769583	16.0151	26.6767	15.8778			57.6286	73.9777	52.1798
0.77	16.0674	26.7643	15.8371			57.643	74.1738	52.207
0.770417	16.18	26.9035	15.8411			57.7527	74.3046	52.2665
0.770833	15.9004	26.9242	15.9237			57.8124	74.4437	52.2811
0.77125	16.0394	26.2975	15.8124			58.0051	74.5502	52.339
0.771667	16.1187	26.3968	15.8436			58.0204	74.7072	52.4262
0.772083	16.1352	26.4985	15.8256			58.1765	74.8089	52.4236
0.7725	16.0208	26.4863	15.8196			58.3486	74.9637	52.4674
0.772917	16.0927	26.4372	15.7375			58.3883	75.1303	52.5382
0.773333	16.0141	26.6007	15.7853			58.4388	75.286	52.5721
0.77375	15.9017	26.5422	15.6622			58.4772	75.4273	52.6431
0.774167	15.966	26.5573	15.7356			58.6784	75.6073	52.6292
0.774583	15.9449	26.7013	15.6792			58.709	75.8111	52.6934
0.775	16.0717	26.636	15.7247			58.7739	75.8772	52.6739
0.775417	15.983	26.3267	15.8405			58.9246	76.059	52.9738
0.775833	16.0205	26.692	15.7875			59.1536	76.1526	53.0805
0.77625	16.0776	26.319	15.6939			59.3794	76.271	53.1712
0.776667	16.0029	26.2703	15.7215			59.4461	76.3813	53.1668
0.777083	16.0101	26.4516	15.7013			59.3581	76.621	53.1768
0.7775	15.9585	26.6013	15.768			59.5544	76.7322	53.2105
0.777917	16.0769	26.4022	15.7482			59.6495	76.8656	53.1281
0.778333	16.1127	26.6414	15.7816			59.6821	76.9146	53.1132
0.77875	16.2614	26.5461	15.8041			59.8642	77.1328	53.2396
0.779167	16.1938	26.418	15.6436			59.8664	77.1923	53.1982
0.779583	16.0984	26.375	15.6256			60.0021	77.4033	53.328
0.78	15.8822	26.5615	15.6624			60.0691	77.5906	53.414
0.780417	15.8466	26.7009	15.6953			60.1755	77.7243	53.5056
0.780833	15.908	26.9013	15.7524			60.3733	77.8397	53.5344
0.78125	15.9081	26.8692	15.723			60.4718	78.0209	53.6203
0.781667	15.9124	26.7302	15.7354			60.5646	78.147	53.6378
0.782083	15.8357	26.5084	15.6837			60.6006	78.3341	53.793
0.7825	15.6255	26.6172	15.6598			60.9473	78.4844	53.8461
0.782917	15.4887	26.4911	15.7459			60.9312	78.6321	54.0628
0.783333	15.6952	26.299	15.7724			60.9136	78.7284	54.1731
0.78375	15.7664	26.4795	15.6762			61.0892	78.8657	54.201
0.784167	15.6183	26.4872	15.6839			61.1153	78.9711	54.315
0.784583	15.6179	26.7216	15.6963			61.2278	79.0955	54.2546
0.785	15.5737	26.6264	15.6314			61.2666	79.3226	54.241
0.785417	15.8681	26.4079	15.6635			61.4741	79.4434	54.4492
0.785833	15.9068	26.5013	15.7261			61.608	79.573	54.4821
0.78625	15.7789	26.6436	15.6969			61.7481	79.7763	54.4706
0.786667	16.0063	26.4796	15.6932			61.7512	79.9078	54.6342
0.787083	15.8643	26.5258	15.6205			61.8015	80.0828	54.7054
0.7875	15.7235	26.86	15.6751			61.7731	80.2053	54.6968
0.787917	15.7068	26.5273	15.6258			61.9857	80.345	54.7558
0.788333	15.5094	26.5506	15.594			62.1784	80.385	54.8338
0.78875	15.3999	26.6936	15.7204			62.385	80.5441	54.8768
0.789167	15.6584	26.4162	15.6799			62.2313	80.6657	54.9352
0.789583	15.5135	26.3573	15.6702			62.399	80.8324	54.9724
0.79	15.6562	26.4552	15.6727			62.4761	81.0243	55.0681
0.790417	15.5437	26.4979	15.7355			62.655	81.1654	55.1233
0.790833	15.6846	26.7978	15.6507			62.8151	81.3254	55.1757
0.79125	15.4644	26.6732	15.6503			62.7623	81.4914	55.1831
0.791667	15.514	26.9556	15.6565			63.0332	81.6113	55.2569
0.792083	15.5261	26.7036	15.5954			63.0151	81.8285	55.4051
0.7925	16.0385	26.3914	15.6524			63.0821	81.9816	55.4408
0.792917	15.7525	26.662	15.6993			63.2488	82.2302	55.5029
0.793333	15.7095	26.4666	15.6761			63.3581	82.3451	55.5857
0.79375	15.8108	26.4873	15.5718			63.3109	82.4652	55.6727
0.794167	15.5503	26.5842	15.5872			63.5954	82.6351	55.7061
0.794583	15.6709	26.4928	15.6525			63.5254	82.8265	55.8084
0.795	15.582	26.3462	15.732			63.7188	83.0868	55.888
0.795417	15.7818	26.5911	15.6781			63.7867	83.2126	55.9134
0.795833	15.8902	26.5997	15.6969			63.9394	83.3555	56.015
0.79625	16.0174	26.806	15.6762			64.0061	83.5532	56.088
0.796667	15.8802	26.4741	15.5072			64.1439	83.6477	56.1019
0.797083	15.5218	26.3187	15.5891			64.3161	83.8823	56.1509
0.7975	15.539	26.4202	15.6098			64.6031	84.0711	56.2515
0.797917	15.6827	26.3477	15.5183			64.5213	84.182	56.3118
0.798333	15.527	26.7025	15.6231			64.523	84.3832	56.3655
0.79875	15.5188	26.9008	15.6948			64.6585	84.4656	56.4511
0.799167	15.628	26.6735	15.6915			64.8191	84.6682	56.5211
0.799583	15.6669	26.4728	15.6409			64.9439	84.8746	56.6136
0.8	15.5658	26.6775	15.5653			65.0242	85.0183	56.6739
0.800417	15.6837	26.7593	15.5805			65.1259	85.2325	56.7511
0.800833	15.8025	26.405	15.679			65.1065	85.4167	56.786
0.80125	15.9628	26.5466	15.6167			65.3007	85.6076	56.8811
0.801667	15.7967	26.3364	15.5874			65.4943	85.7973	56.9353
0.802083	15.9157	26.1931	15.6152			65.6111	85.8805	56.8731
0.8025	16.183	26.403	15.5913			65.6115	86.0062	56.8791
0.802917	15.8229	26.4852	15.5479			65.5993	86.248	56.6739
0.803333	15.4682	26.2378	15.6667			65.8844	86.4883	56.4151
0.80375	15.601	26.343	15.5109			65.9651	86.7204	56.7798
0.804167	15.3831	26.2452	15.5951			66.124	86.9841	57.047
0.804583	15.4758	26.2429	15.5526			66.1235	87.1284	57.0835
0.805	15.6697	26.2422	15.6161			66.3439	87.3339	57.2242
0.805417	15.5145	26.4208	15.4928			66.3592	87.6037	57.2552
0.805833	15.6492	26.1914	15.5509			66.5281	87.6293	57.4043
0.80625	15.9665	26.2612	15.5597			66.6492	87.7746	57.5049
0.806667	16.1715	26.3652	15.5916			66.669	87.9896	57.651
0.807083	15.6285	26.4383	15.5761			66.7936	88.2062	57.7322
0.8075	15.6453	26.4771	15.5672			66.9581	88.5022	58.5239
0.807917	15.7101	26.4522	15.4429			67.0895	88.6184	58.8291
0.808333	15.6586	26.4722	15.4496			67.2178	88.7256	58.5965
0.80875	15.7051	26.4499	15.4761			67.2106	88.8712	58.5131
0.809167	15.3956	26.4025	15.4852			67.3992	89.1596	58.5745
0.809583	15.8401	26.2391	15.4275			67.4872	89.2393	58.6111
0.81	15.8654	25.8934	15.4622			67.6522	89.3879	58.6863
0.810417	15.4198	26.4507	15.5078			67.6823	89.6145	58.728
0.810833	15.4711	26.297	15.4231			67.7684	89.8476	58.8149
0.81125	15.3648	26.4376	15.4395			67.9679	90.0161	58.9034
0.811667	15.3098	26.6444	15.4611			68.0362	90.2144	58.9657
0.812083	15.3375	26.6952	15.481			68.1228	90.3799	59.0738
0.8125	15.5287	26.7134	15.4727			68.324	90.4896	59.1252
0.812917	15.6395	26.3993	15.4498			68.4087	90.643	59.2077
0.813333	15.3557	26.3968	15.4357			68.4488	90.9066	59.2592
0.81375	15.3055	26.5055	15.389			68.577	91.0547	59.3214
0.814167	15.2745	26.3113	15.388			68.5581	91.2291	59.3533
0.814583	15.2145	26.1847	15.4017			68.7371	91.3743	59.4619
0.815	15.1668	26.282	15.5097			68.9014	91.5448	59.4825
0.815417	15.3108	26.367	15.46			69.0756	91.7086	59.5519
0.815833	15.3389	26.4704	15.438			68.9817	91.9035	59.6001
0.81625	15.2094	26.3697	15.3432			69.1748	92.1073	59.7199
0.816667	15.2523	26.2578	15.4557			69.2825	92.2348	59.7848
0.817083	15.2206	26.5587	15.4889			69.2875	92.5121	59.8557
0.8175	15.3778	26.6126	15.4721			69.3479	92.6374	59.9114
0.817917	15.577	26.2827	15.4417			69.5406	92.8824	60.0083
0.818333	15.2862	26.214	15.5258			69.6263	93.0607	60.1087
0.81875	15.2299	25.918	15.4217			69.6137	93.3612	60.2156
0.819167	15.2768	26.1131	15.4506			69.8744	93.3805	60.2296
0.819583	15.3301	26.4789	15.3825			69.8964	93.5846	60.2888
0.82	15.387	26.6256	15.4874			69.8605	93.7072	60.3596
0.820417	15.5387	26.1763	15.4677			70.0981	93.9136	60.4268
0.820833	15.3036	26.1368	15.2994			70.2321	94.0989	60.5533
0.82125	15.1878	26.388	15.3386			70.4227	94.3074	60.6358
0.821667	15.094	26.3519	15.4036			70.3958	94.581	60.7029
0.822083	15.2669	26.1371	15.4831			70.4426	94.7228	60.8009
0.8225	15.3066	26.0983	15.4936			70.5387	94.8576	60.851
0.822917	15.3782	25.9803	15.3664			70.7152	95.0125	60.9842
0.823333	15.4393	26.0737	15.4071			70.8161	95.2465	61.0376
0.82375	15.2438	26.0516	15.4238			70.8519	95.4993	61.1549
0.824167	15.1869	26.1127	15.4125			70.9684	95.6556	61.1785
0.824583	15.3752	26.2121	15.4133			71.1728	95.8084	61.2728
0.825	15.2384	26.5161	15.5745			71.2	96.0497	61.4149
0.825417	15.1905	26.1764	15.3957			71.319	96.2771	61.5022
0.825833	15.2993	26.146	15.4619			71.4391	96.5025	61.588
0.82625	15.3147	26.3607	15.3717			71.525	96.5837	61.6817
0.826667	15.3075	26.1131	15.4363			71.7079	96.7778	61.8105
0.827083	15.3971	26.1773	15.3844			71.6656	97.0273	61.8564
0.8275	15.5146	26.5662	15.2873			71.7223	97.2138	61.945
0.827917	15.4618	26.2572	15.2319			71.9237	97.3606	62.0548
0.828333	15.3225	26.3205	15.2763			72.0275	97.553	62.1672
0.82875	15.377	26.6359	15.3587			72.1025	97.8417	62.2558
0.829167	15.6888	26.4082	15.3604			72.2282	98.0804	62.3424
0.829583	15.5378	26.2876	15.3878			72.3194	98.3337	62.392
0.83	15.4065	26.1736	15.3615			72.3648	98.2578	62.5161
0.830417	15.2776	26.4342	15.2759			72.5395	98.607	62.6089
0.830833	15.2374	26.3437	15.3201			72.5567	98.8578	62.7167
0.83125	15.3152	26.2536	15.3636			72.7832	98.9559	62.8059
0.831667	15.4527	26.3006	15.3349			72.9583	99.1754	62.8719
0.832083	15.3102	26.1822	15.3151			72.9482	99.4156	62.9766
[truncated: 3,141 more rows]
