# Supplementary material for: Extracellular electron transfer increases fermentation in lactic acid bacteria via a hybrid metabolism
Source: eLife. 2022 Feb 11;11:e70684. doi: 10.7554/eLife.70684 (PMC8837199; doi:10.7554/eLife.70684)
Supplement: Figure 1—figure supplement 3—source data 1. [file elife-70684-fig1-figsupp3-data1.xlsx]

## Sheet: Panel A iron reduction
	rep1	rep2	rep3
0 μg/ml DHNA	20.7094	23.2126	23.9166	[Fe2+] (μM)
0.01 μg/ml DHNA	31.8388	30.917	34.1295
Two-tailed t-test	0.0109948

## Sheet: Panel B current density
	0 μg/ml DHNA		0.01 μg/ml DHNA
	rep1	rep2	rep1	rep2
Time (h)	μA/cm2	μA/cm2	μA/cm2	μA/cm2
-14.44	8.6263	7.85187	8.42159	10.3044
-14.43	4.03737	2.30354	3.57568	6.60969
-14.42	3.45748	1.56827	2.9992	6.00951
-14.41	3.1855	1.17292	2.84063	5.77805
-14.4	3.00876	1.00287	2.69559	5.63679
-14.39	2.95996	0.896117	2.58853	5.39039
-14.38	2.87047	0.831855	2.52317	5.34987
-14.37	2.80258	0.797092	2.48589	5.25889
-14.36	2.76459	0.779631	2.41657	5.12885
-14.35	2.6954	0.755421	2.32962	5.02622
-14.34	2.70267	0.744184	2.33738	4.99059
-14.33	2.62165	0.729885	2.31573	4.89879
-14.32	2.60327	0.717272	2.27363	4.86894
-14.31	2.58403	0.694306	2.21142	4.86229
-14.3	2.55009	0.68987	2.20382	4.62861
-14.29	2.51615	0.681756	2.25736	4.64432
-14.28	2.50626	0.676887	2.16873	4.50542
-14.27	2.49066	0.669891	2.13003	4.49794
-14.26	2.45743	0.656244	2.14694	4.52097
-14.25	2.42325	0.656129	2.13355	4.41743
-14.24	2.42846	0.644286	2.06027	4.41757
-14.23	2.40946	0.634797	2.08882	4.34424
-14.22	2.37701	0.628562	2.03587	4.335
-14.21	2.39971	0.623776	2.00166	4.31065
-14.2	2.34907	0.628767	2.03195	4.19899
-14.19	2.37601	0.624381	2.02553	4.1475
-14.18	2.32332	0.622875	2.00436	4.04238
-14.17	2.31971	0.60912	2.00254	4.03449
-14.16	2.29697	0.617741	1.97652	4.01791
-14.15	2.28684	0.598335	1.97248	3.94778
-14.14	2.29146	0.594654	1.96674	3.84733
-14.13	2.24544	0.583594	1.91143	3.82162
-14.12	2.21464	0.580991	1.92387	3.83552
-14.11	2.22595	0.573355	1.87762	3.68038
-14.1	2.22383	0.572851	1.87641	3.6171
-14.09	2.19618	0.578166	1.88328	3.66103
-14.08	2.18251	0.566883	1.86975	3.65862
-14.07	2.24766	0.561878	1.86299	3.515
-14.06	2.24859	0.561213	1.85272	3.44232
-14.05	2.23299	0.560695	1.83263	3.56641
-14.04	2.19599	0.550463	1.82312	3.49027
-14.03	2.21248	0.536217	1.83003	3.49716
-14.02	2.20658	0.537217	1.78892	3.38635
-14.01	2.20139	0.539582	1.75767	3.33242
-14	2.14113	0.529121	1.77586	3.33798
-13.99	2.13204	0.523542	1.74842	3.30891
-13.98	2.15309	0.517711	1.75225	3.30728
-13.97	2.12419	0.522595	1.73353	3.2332
-13.96	2.08522	0.517379	1.72581	3.2077
-13.95	2.07404	0.520876	1.69966	3.23913
-13.94	2.06402	0.508864	1.70036	3.12507
-13.93	2.08944	0.515431	1.69766	3.15253
-13.92	2.07157	0.505681	1.69038	3.05092
-13.91	2.01322	0.500261	1.65807	3.04249
-13.9	2.02852	0.506216	1.64921	2.93747
-13.89	2.02164	0.503789	1.65975	2.96698
-13.88	2.02648	0.496329	1.6335	2.89846
-13.87	1.99498	0.494715	1.62253	2.88124
-13.86	1.99766	0.506263	1.61983	2.86373
-13.85	1.97327	0.502098	1.61474	2.8756
-13.84	1.94617	0.485846	1.60899	2.84316
-13.83	1.9573	0.485768	1.55873	2.82264
-13.82	1.94915	0.490906	1.5697	2.75302
-13.81	1.95187	0.478641	1.55187	2.75009
-13.8	1.90477	0.475091	1.56482	2.66396
-13.79	1.90453	0.46831	1.5652	2.70701
-13.78	1.91424	0.469478	1.56595	2.66318
-13.77	1.88495	0.463266	1.55634	2.69824
-13.76	1.9079	0.456793	1.53732	2.66905
-13.75	1.86287	0.451049	1.48205	2.58749
-13.74	1.87541	0.451241	1.47191	2.59587
-13.73	1.85264	0.451335	1.48982	2.51881
-13.72	1.86087	0.454467	1.50227	2.54401
-13.71	1.83574	0.446783	1.46912	2.45537
-13.7	1.82059	0.442984	1.45313	2.51636
-13.69	1.8139	0.43823	1.47254	2.49723
-13.68	1.81007	0.443337	1.44676	2.39955
-13.67	1.78047	0.440951	1.45898	2.38695
-13.66	1.76231	0.443615	1.44825	2.41202
-13.65	1.75231	0.435133	1.45095	2.4068
-13.64	1.74197	0.430012	1.45892	2.35878
-13.63	1.71453	0.437412	1.43052	2.29468
-13.62	1.73909	0.433615	1.42751	2.27525
-13.61	1.74445	0.432322	1.40053	2.26675
-13.6	1.70918	0.435659	1.40926	2.26622
-13.59	1.71244	0.430423	1.38764	2.24788
-13.58	1.67537	0.418506	1.36887	2.21401
-13.57	1.66335	0.426749	1.39655	2.21107
-13.56	1.63941	0.420985	1.36081	2.13716
-13.55	1.65726	0.416568	1.37585	2.15656
-13.54	1.66169	0.419892	1.34457	2.13142
-13.53	1.63409	0.418185	1.34144	2.11106
-13.52	1.63261	0.414158	1.36204	2.12555
-13.51	1.6449	0.414034	1.35532	2.08612
-13.5	1.61937	0.416558	1.33554	2.11712
-13.49	1.6264	0.407248	1.31632	2.05114
-13.48	1.61653	0.407968	1.30149	2.0028
-13.47	1.59128	0.404402	1.28852	2.04977
-13.46	1.59114	0.407024	1.2935	2.00717
-13.45	1.59074	0.404084	1.29039	1.98103
-13.44	1.60857	0.400659	1.27648	1.95869
-13.43	1.58037	0.410484	1.30113	1.96412
-13.42	1.54528	0.395418	1.25997	1.91975
-13.41	1.55753	0.398849	1.26047	1.92593
-13.4	1.55367	0.401817	1.25435	1.90846
-13.39	1.53375	0.393242	1.25948	1.8934
-13.38	1.50695	0.383731	1.24511	1.91258
-13.37	1.51928	0.395893	1.21667	1.8487
-13.36	1.50874	0.39697	1.24742	1.89402
-13.35	1.49444	0.396109	1.23678	1.8612
-13.34	1.4985	0.390943	1.21925	1.82427
-13.33	1.49588	0.385474	1.21171	1.79461
-13.32	1.46751	0.386298	1.23936	1.78191
-13.31	1.4602	0.387939	1.21379	1.79037
-13.3	1.46319	0.387397	1.20064	1.7505
-13.29	1.46188	0.385423	1.20676	1.7494
-13.28	1.45767	0.377199	1.18964	1.75457
-13.27	1.44835	0.37483	1.19419	1.70767
-13.26	1.43947	0.386183	1.19229	1.7371
-13.25	1.4164	0.375775	1.17235	1.6838
-13.24	1.41757	0.375609	1.15692	1.68016
-13.23	1.4055	0.383161	1.17443	1.6876
-13.22	1.39912	0.379009	1.16329	1.65027
-13.21	1.40925	0.377125	1.18077	1.62488
-13.2	1.43011	0.371973	1.18289	1.63913
-13.19	1.40358	0.37588	1.19597	1.62517
-13.18	1.38369	0.372431	1.16343	1.62166
-13.17	1.37905	0.367295	1.15425	1.57392
-13.16	1.3818	0.368285	1.14046	1.60472
-13.15	1.41274	0.378262	1.13329	1.56939
-13.14	1.35723	0.371904	1.12512	1.5702
-13.13	1.34594	0.368573	1.13966	1.5699
-13.12	1.34784	0.368768	1.14591	1.55277
-13.11	1.34914	0.366192	1.12811	1.55812
-13.1	1.34308	0.380745	1.12334	1.54006
-13.09	1.33143	0.371387	1.1083	1.54419
-13.08	1.34066	0.350987	1.10076	1.47752
-13.07	1.31939	0.367286	1.1086	1.49651
-13.06	1.31893	0.373953	1.11526	1.4726
-13.05	1.3128	0.378363	1.106	1.46926
-13.04	1.31681	0.36755	1.09973	1.49401
-13.03	1.27421	0.35431	1.09445	1.46006
-13.02	1.2881	0.362606	1.10199	1.42351
-13.01	1.27767	0.368633	1.08409	1.4074
-13	1.26917	0.232278	1.08053	1.40714
-12.99	1.27465	0.355228	1.07274	1.37816
-12.98	1.25845	0.350627	1.06761	1.38881
-12.97	1.25521	-0.0485255	1.07373	1.38603
-12.96	1.2574	0.367503	1.05546	1.41034
-12.95	1.27056	0.360849	1.04554	1.3662
-12.94	1.2673	0.36667	1.05765	1.35084
-12.93	1.24803	0.361612	1.05564	1.34677
-12.92	1.22024	0.358353	1.06283	1.33932
-12.91	1.22733	0.348777	1.04039	1.32575
-12.9	1.23331	0.368289	1.05694	1.34731
-12.89	1.23449	0.346075	1.048	1.33785
-12.88	1.22138	0.350525	1.05036	1.3536
-12.87	1.22373	0.355913	1.04098	1.32111
-12.86	1.23459	0.355152	1.03262	1.29255
-12.85	1.21847	0.352526	1.02438	1.2871
-12.84	1.22306	0.358683	1.0407	1.29655
-12.83	1.20807	0.348665	1.01476	1.26663
-12.82	1.20699	0.343853	1.01536	1.25259
-12.81	1.19761	0.343041	1.01718	1.27082
-12.8	1.21589	-0.0221797	1.0243	1.2475
-12.79	1.20403	0.344281	1.0117	1.23531
-12.78	1.18352	0.349258	0.994069	1.23814
-12.77	1.1969	0.260959	0.993749	1.23294
-12.76	1.20153	0.343087	1.01191	1.2243
-12.75	1.17929	0.324846	0.997425	1.20751
-12.74	1.18513	0.346513	1.00034	1.19795
-12.73	1.14814	0.342295	0.998117	1.20252
-12.72	1.1611	0.345838	0.9858	1.20634
-12.71	1.15568	0.340548	0.974141	1.19362
-12.7	1.15113	0.33472	0.959241	1.18178
-12.69	1.15579	0.346094	0.984661	1.18904
-12.68	1.15242	0.346946	0.999336	1.16159
-12.67	1.16102	0.344913	0.97129	1.1855
-12.66	1.13765	0.341342	0.96397	1.17639
-12.65	1.13772	0.241083	0.962867	1.16833
-12.64	1.12721	0.33351	0.962671	1.15364
-12.63	1.13118	0.347314	0.938737	1.13217
-12.62	1.11209	0.338329	0.950107	1.13603
-12.61	1.13336	0.345317	0.932773	1.13138
-12.6	1.11382	0.340625	0.922825	1.1289
-12.59	1.13412	0.341077	0.941287	1.12581
-12.58	1.09019	0.32335	0.95152	1.11049
-12.57	1.09735	0.334075	0.948071	1.12032
-12.56	1.09649	0.327357	0.945421	1.10158
-12.55	1.10287	0.368876	0.924918	1.08508
-12.54	1.08909	0.339594	0.913385	1.09128
-12.53	1.08239	0.330498	0.929804	1.10318
-12.52	1.07845	0.334957	0.932715	1.08601
-12.51	1.07766	0.323896	0.924263	1.10086
-12.5	1.0653	0.335809	0.904269	1.06661
-12.49	1.0766	0.326211	0.90907	1.08103
-12.48	1.07984	0.307953	0.923027	1.09415
-12.47	1.08653	0.32775	0.916495	1.06579
-12.46	1.06879	0.263013	0.893134	1.06733
-12.45	1.07834	0.306664	0.898825	1.05627
-12.44	1.07503	0.32543	0.898672	1.04357
-12.43	1.05562	0.325038	0.904818	1.03371
-12.42	1.04884	0.328154	0.87049	1.04191
-12.41	1.06547	0.325879	0.88445	1.04463
-12.4	1.05586	0.326002	0.873281	1.02776
-12.39	1.05723	0.334091	0.890106	1.02647
-12.38	1.04227	0.326096	0.869382	1.02101
-12.37	1.02247	0.327796	0.869188	1.016
-12.36	1.02736	0.329472	0.85801	1.01915
-12.35	1.00536	0.321907	0.874174	0.999173
-12.34	1.02168	0.316106	0.867342	1.0095
-12.33	1.00819	0.325208	0.846909	0.992249
-12.32	1.00418	0.320085	0.874707	0.987466
-12.31	1.00053	0.318205	0.869145	0.986356
-12.3	1.00025	0.310352	0.852331	0.975853
-12.29	0.989	0.32718	0.844341	0.976344
-12.28	0.969908	0.332781	0.859989	0.951207
-12.27	0.982798	0.325577	0.848914	0.959826
-12.26	0.990117	0.321231	0.80735	0.938064
-12.25	0.97806	0.317517	0.802898	0.957658
-12.24	0.962078	0.303075	0.771551	0.947439
-12.23	0.96959	0.323916	0.782931	0.946278
-12.22	0.957671	0.315254	0.76999	0.935955
-12.21	0.959977	0.312206	0.75389	0.92748
-12.2	0.965168	0.300963	0.756823	0.909047
-12.19	0.953366	0.306919	0.760822	0.915568
-12.18	0.948603	0.311717	0.745061	0.896438
-12.17	0.928236	0.280431	0.74849	0.893795
-12.16	0.938507	0.300876	0.735833	0.893325
-12.15	0.925629	0.300458	0.736379	0.871492
-12.14	0.912776	0.377331	0.714743	0.880206
-12.13	0.916483	0.28869	0.72659	0.864971
-12.12	0.901981	0.302401	0.721005	0.858663
-12.11	0.904613	0.410101	0.720329	0.849965
-12.1	0.889933	0.293753	0.713325	0.834123
-12.09	0.898531	0.276404	0.728335	0.835831
-12.08	0.896138	0.297668	0.715219	0.846577
-12.07	0.883585	0.286957	0.709965	0.852952
-12.06	0.88812	0.292829	0.709846	0.834889
-12.05	0.891079	0.303651	0.699132	0.823461
-12.04	0.894444	0.281603	0.703866	0.831372
-12.03	0.876497	0.198241	0.707258	0.818102
-12.02	0.870917	0.274444	0.702905	0.819979
-12.01	0.873846	0.331469	0.705314	0.81912
-12	0.87684	0.278094	0.697157	0.805308
-11.99	0.876428	0.267165	0.697815	0.807624
-11.98	0.872833	0.276537	0.693553	0.803023
-11.97	0.862707	0.279166	0.683064	0.799784
-11.96	0.865356	0.274664	0.686381	0.791876
-11.95	0.868427	0.267748	0.694134	0.768832
-11.94	0.858086	0.271289	0.695677	0.781866
-11.93	0.839379	0.269383	0.686975	0.776479
-11.92	0.845191	0.210717	0.681985	0.767773
-11.91	0.850681	0.305635	0.668559	0.768734
-11.9	0.84696	0.267986	0.686251	0.75672
-11.89	0.830802	0.269578	0.69389	0.748539
-11.88	0.838707	0.277122	0.664418	0.740656
-11.87	0.831497	0.259057	0.672121	0.753851
-11.86	0.824347	0.255661	0.672583	0.742938
-11.85	0.825108	0.261007	0.671726	0.738395
-11.84	0.828783	0.265808	0.665302	0.734087
-11.83	0.826405	0.267442	0.67552	0.716481
-11.82	0.820784	0.276102	0.667959	0.724
-11.81	0.810944	0.152105	0.664525	0.729398
-11.8	0.804102	0.254914	0.657681	0.71776
-11.79	0.804524	0.257582	0.652148	0.713967
-11.78	0.812478	0.263911	0.652184	0.71821
-11.77	0.801824	0.27093	0.649687	0.696683
-11.76	0.79935	0.282562	0.6503	0.698353
-11.75	0.793898	0.249376	0.649415	0.70453
-11.74	0.783048	0.255878	0.63774	0.698193
-11.73	0.776081	0.25501	0.644051	0.698651
-11.72	0.768729	0.255137	0.63734	0.697663
-11.71	0.769166	0.252217	0.623842	0.693154
-11.7	0.777509	0.247239	0.626467	0.673102
-11.69	0.764929	0.249007	0.622992	0.667931
-11.68	0.753449	0.266488	0.619257	0.676262
-11.67	0.757583	0.182136	0.621508	0.667359
-11.66	0.757145	0.241673	0.615364	0.676009
-11.65	0.758968	0.245761	0.607027	0.664452
-11.64	0.763806	0.251072	0.609253	0.658037
-11.63	0.748413	0.247797	0.609538	0.666153
-11.62	0.742961	0.287876	0.598925	0.659249
-11.61	0.736246	0.234932	0.591884	0.639184
-11.6	0.727281	0.242281	0.583282	0.65391
-11.59	0.743115	0.25308	0.583652	0.642222
-11.58	0.733238	0.243654	0.588172	0.633148
-11.57	0.729662	0.258761	0.593617	0.640154
-11.56	0.734394	0.239497	0.583176	0.628936
-11.55	0.725766	0.236302	0.579807	0.630045
-11.54	0.704063	0.231801	0.572088	0.636749
-11.53	0.7171	0.234462	0.573215	0.617663
-11.52	0.716086	0.229174	0.573275	0.629413
-11.51	0.718842	0.242735	0.574714	0.621822
-11.5	0.716565	0.11372	0.564667	0.616392
-11.49	0.707092	0.234364	0.568987	0.615907
-11.48	0.703124	0.217054	0.567687	0.613938
-11.47	0.698849	0.181534	0.565854	0.606949
-11.46	0.698749	0.184857	0.56437	0.598047
-11.45	0.697762	0.23039	0.55993	0.607611
-11.44	0.700556	0.223764	0.553408	0.613796
-11.43	0.70089	0.230982	0.546513	0.605267
-11.42	0.690455	0.225849	0.558129	0.602582
-11.41	0.680138	0.237989	0.542946	0.591107
-11.4	0.686547	0.226263	0.550729	0.593203
-11.39	0.682784	0.223443	0.544142	0.59851
-11.38	0.680485	0.214402	0.539862	0.586296
-11.37	0.678246	0.167514	0.544839	0.587204
-11.36	0.671153	0.219344	0.53925	0.580797
-11.35	0.676135	0.226466	0.549577	0.58469
-11.34	0.674956	0.223419	0.536264	0.571764
-11.33	0.677922	0.174231	0.534781	0.566886
-11.32	0.672758	0.202091	0.533052	0.565207
-11.31	0.661899	0.217868	0.527217	0.575023
-11.3	0.665846	0.216713	0.521276	0.561917
-11.29	0.657157	0.214287	0.525828	0.56025
-11.28	0.658971	0.219532	0.511466	0.559751
-11.27	0.65228	0.203059	0.512635	0.55859
-11.26	0.637074	0.217653	0.514661	0.559158
-11.25	0.638698	0.213293	0.512321	0.553729
-11.24	0.648184	0.239298	0.511943	0.549846
-11.23	0.649279	0.208032	0.518736	0.552257
-11.22	0.638274	0.208221	0.521436	0.555706
-11.21	0.640326	0.203365	0.511598	0.538489
-11.2	0.638813	0.205708	0.518209	0.548999
-11.19	0.638875	0.206424	0.513177	0.538348
-11.18	0.638841	0.226244	0.517337	0.536746
-11.17	0.628192	0.217275	0.51466	0.539641
-11.16	0.624667	0.206099	0.494824	0.53895
-11.15	0.622841	0.208503	0.49996	0.528931
-11.14	0.62366	0.211409	0.503339	0.539207
-11.13	0.620614	0.21487	0.503043	0.526462
-11.12	0.619114	0.204744	0.499216	0.526924
-11.11	0.615017	0.204626	0.497749	0.526803
-11.1	0.612258	0.226075	0.498774	0.5296
-11.09	0.613347	0.217585	0.494733	0.522035
-11.08	0.61625	0.20193	0.499825	0.514047
-11.07	0.608226	0.203162	0.489582	0.51294
-11.06	0.611683	0.206087	0.499947	0.50624
-11.05	0.605947	0.205121	0.486174	0.505836
-11.04	0.60014	0.209758	0.4912	0.518389
-11.03	0.599221	0.202482	0.486966	0.512312
-11.02	0.603308	0.199232	0.483155	0.513158
-11.01	0.601082	0.202964	0.485469	0.506972
-11	0.602723	0.199881	0.486534	0.502484
-10.99	0.59398	0.198898	0.479792	0.507213
-10.98	0.582024	0.19986	0.48755	0.501168
-10.97	0.582928	0.202044	0.479028	0.500596
-10.96	0.589121	0.197105	0.478312	0.503318
-10.95	0.582727	0.195084	0.469699	0.495926
-10.94	0.573857	0.199866	0.470695	0.499434
-10.93	0.573746	0.195048	0.471567	0.499336
-10.92	0.577345	0.194417	0.471954	0.489288
-10.91	0.577396	0.194359	0.466507	0.490344
-10.9	0.579902	0.190888	0.465176	0.491562
-10.89	0.579148	0.193688	0.456803	0.494216
-10.88	0.566093	0.232649	0.456599	0.485297
-10.87	0.565632	0.194133	0.461443	0.481588
-10.86	0.560011	0.192996	0.462034	0.490048
-10.85	0.572324	0.192472	0.456518	0.48474
-10.84	0.567272	0.192441	0.457856	0.480513
-10.83	0.560116	0.192532	0.455005	0.480109
-10.82	0.558915	0.190135	0.452325	0.48002
-10.81	0.55275	0.186314	0.451644	0.481545
-10.8	0.53573	0.193303	0.459582	0.476757
-10.79	0.540938	0.188319	0.458151	0.480492
-10.78	0.541463	0.188889	0.462204	0.48112
-10.77	0.531802	0.159703	0.446152	0.478274
-10.76	0.535811	0.188882	0.447918	0.474863
-10.75	0.530316	0.187379	0.446754	0.4746
-10.74	0.531753	0.0983117	0.446439	0.472606
-10.73	0.529564	0.185151	0.45126	0.473144
-10.72	0.524133	0.184262	0.440632	0.470317
-10.71	0.522768	0.165605	0.440426	0.467064
-10.7	0.52485	0.18619	0.438734	0.470836
-10.69	0.524918	0.185044	0.440396	0.468213
-10.68	0.519041	0.196415	0.428015	0.460513
-10.67	0.515306	0.130305	0.431871	0.45232
-10.66	0.510595	0.182567	0.434184	0.458748
-10.65	0.515801	0.182928	0.430772	0.456655
-10.64	0.517054	0.18384	0.428168	0.457026
-10.63	0.51439	0.130113	0.427212	0.459187
-10.62	0.510736	0.184826	0.425359	0.45039
-10.61	0.50644	0.180706	0.427111	0.451808
-10.6	0.507145	0.181354	0.431869	0.446771
-10.59	0.505175	0.180913	0.422542	0.45234
-10.58	0.50419	0.196683	0.423525	0.446784
-10.57	0.502882	0.167342	0.42726	0.450455
-10.56	0.504428	0.180312	0.422613	0.446823
-10.55	0.504221	0.184879	0.420606	0.446918
-10.54	0.503854	0.179211	0.414169	0.440743
-10.53	0.504233	0.178768	0.413427	0.444884
-10.52	0.501107	0.22147	0.418127	0.434032
-10.51	0.501214	0.180676	0.411584	0.43989
-10.5	0.494144	0.176654	0.412079	0.442269
-10.49	0.498251	0.17357	0.408365	0.439776
-10.48	0.489186	0.180955	0.413973	0.436529
-10.47	0.48737	0.177324	0.408463	0.435976
-10.46	0.483463	0.141498	0.406748	0.430757
-10.45	0.491788	0.177392	0.404154	0.432014
-10.44	0.485369	0.188574	0.402917	0.427529
-10.43	0.48408	0.171651	0.402667	0.441161
-10.42	0.48664	0.168507	0.406318	0.429921
-10.41	0.48171	0.174152	0.398259	0.428108
-10.4	0.480768	0.174342	0.398314	0.422846
-10.39	0.477448	0.172787	0.396641	0.428407
-10.38	0.47774	0.134725	0.393938	0.43166
-10.37	0.482272	0.170179	0.396439	0.424954
-10.36	0.485764	0.168368	0.399567	0.419564
-10.35	0.484866	0.172465	0.398894	0.417627
-10.34	0.481815	0.170317	0.39543	0.414362
-10.33	0.484287	0.169376	0.400283	0.413664
-10.32	0.483512	0.170489	0.400909	0.412921
-10.31	0.478789	0.120752	0.400291	0.414498
-10.3	0.478048	0.173499	0.396658	0.411768
-10.29	0.476234	0.128609	0.392766	0.409151
-10.28	0.477816	0.168856	0.393176	0.407837
-10.27	0.47786	0.167012	0.388183	0.407621
-10.26	0.477401	0.170105	0.380694	0.406124
-10.25	0.476462	0.168966	0.38576	0.409661
-10.24	0.474725	0.167673	0.386074	0.402805
-10.23	0.472372	0.168485	0.385741	0.409263
-10.22	0.469923	0.189744	0.385491	0.408724
-10.21	0.465217	0.161541	0.383186	0.405904
-10.2	0.469594	0.16557	0.377652	0.403276
-10.19	0.466559	0.16751	0.378788	0.407624
-10.18	0.470797	0.165571	0.382827	0.407665
-10.17	0.462149	0.166587	0.387871	0.403114
-10.16	0.463812	0.167848	0.38612	0.405996
-10.15	0.46453	0.171068	0.381387	0.401955
-10.14	0.458229	0.162953	0.373928	0.395764
-10.13	0.461415	0.166053	0.37867	0.395939
-10.12	0.453999	0.252456	0.369972	0.396551
-10.11	0.459563	0.168034	0.372948	0.392886
-10.1	0.461654	0.166482	0.378614	0.392998
-10.09	0.463343	0.168311	0.366942	0.394725
-10.08	0.458185	0.174558	0.37691	0.394283
-10.07	0.455849	0.165071	0.368616	0.397922
-10.06	0.454391	0.167738	0.370252	0.403907
-10.05	0.456028	0.167069	0.368047	0.405303
-10.04	0.454244	0.173262	0.3707	0.406143
-10.03	0.455491	0.0869622	0.368341	0.407687
-10.02	0.452067	0.17077	0.356079	0.404467
-10.01	0.457079	-0.0273474	0.368044	0.403596
-10	0.438407	0.167593	0.368704	0.401067
-9.99	0.427225	0.163885	0.339119	0.404198
-9.98	0.42446	0.170323	0.363659	0.405573
-9.97	0.423348	0.166451	0.358422	0.401185
-9.96	0.420011	0.161596	0.356506	0.402769
-9.95	0.421059	0.0805758	0.360396	0.405172
-9.94	0.417038	0.176086	0.362113	0.404374
-9.93	0.418139	0.145979	0.357578	0.395714
-9.92	0.411631	0.170914	0.35856	0.39444
-9.91	0.413917	0.164048	0.356591	0.396241
-9.9	0.41058	0.161547	0.351705	0.38785
-9.89	0.415241	0.155237	0.353375	0.382568
-9.88	0.410179	0.174333	0.348885	0.379004
-9.87	0.409468	0.161601	0.353378	0.375621
-9.86	0.404337	0.177253	0.340914	0.375455
-9.85	0.405325	0.163921	0.34712	0.379711
-9.84	0.402309	0.163556	0.343909	0.371583
-9.83	0.402267	0.17329	0.325969	0.367866
-9.82	0.407327	0.160326	0.349666	0.371768
-9.81	0.404194	0.162698	0.297174	0.373496
-9.8	0.400258	0.162235	0.338563	0.364546
-9.79	0.402321	0.158512	0.345521	0.37225
-9.78	0.403833	0.160795	0.320727	0.36829
-9.77	0.397458	0.1592	0.340093	0.36352
-9.76	0.396065	0.180521	0.317773	0.368232
-9.75	0.398507	0.126248	0.113017	0.365992
-9.74	0.394424	0.160907	0.317176	0.373503
-9.73	0.395042	0.159585	0.322826	0.366115
-9.72	0.398219	0.153622	0.480683	0.369521
-9.71	0.39826	0.149914	0.103691	0.368291
-9.7	0.396221	0.155822	0.304097	0.365536
-9.69	0.393755	0.176656	0.312137	0.366121
-9.68	0.393686	0.155509	0.335751	0.365344
-9.67	0.401778	0.159175	0.329533	0.364593
-9.66	0.398168	0.151735	0.338191	0.367524
-9.65	0.402081	0.165235	0.333267	0.362275
-9.64	0.399814	0.142819	0.32556	0.359653
-9.63	0.402409	0.160356	0.320834	0.365272
-9.62	0.398028	0.16956	0.322048	0.362293
-9.61	0.400969	0.155627	0.325161	0.357255
-9.6	0.400829	0.156036	0.322198	0.363063
-9.59	0.399737	0.157035	0.318521	0.358442
-9.58	0.393379	0.150118	0.237708	0.355552
-9.57	0.392169	0.148018	0.326392	0.350557
-9.56	0.387104	0.140016	0.321879	0.35925
-9.55	0.389476	0.154423	0.245923	0.35603
-9.54	0.388831	0.150312	0.32385	0.360344
-9.53	0.385529	0.156192	0.157966	0.351013
-9.52	0.391279	0.15322	0.311946	0.354524
-9.51	0.387334	0.149867	0.214826	0.351483
-9.5	0.389163	0.142956	0.312385	0.355166
-9.49	0.386104	0.15188	0.318211	0.350441
-9.48	0.386138	0.152252	0.30296	0.352808
-9.47	0.387795	0.146292	0.28573	0.348742
-9.46	0.384105	0.152799	0.269634	0.34689
-9.45	0.380422	0.148427	0.144839	0.351314
-9.44	0.38261	0.150498	0.313083	0.348372
-9.43	0.37391	0.149723	0.303137	0.348092
-9.42	0.377892	0.152477	0.309313	0.346349
-9.41	0.373842	0.147603	0.297244	0.343636
-9.4	0.375349	0.147218	0.286007	0.347676
-9.39	0.373429	0.151645	0.316406	0.346016
-9.38	0.375856	0.148223	0.309986	0.346226
-9.37	0.375579	0.154517	0.0247263	0.344589
-9.36	0.375296	0.148992	0.0136672	0.344044
-9.35	0.374973	0.146549	0.315231	0.336792
-9.34	0.372303	0.151414	0.267935	0.342437
-9.33	0.370119	0.145887	0.253162	0.344138
-9.32	0.373151	0.143652	0.244523	0.341169
-9.31	0.36683	0.154547	0.303956	0.341859
-9.3	0.369492	0.142709	-0.0340827	0.34101
-9.29	0.368828	0.145578	0.302711	0.334668
-9.28	0.368548	0.147863	0.389675	0.33397
-9.27	0.367903	0.155193	0.286024	0.332972
-9.26	0.368997	0.144837	0.318744	0.336877
-9.25	0.370126	0.13956	-0.0184098	0.338606
-9.24	0.368772	0.145929	0.231513	0.336237
-9.23	0.365756	0.144219	0.302656	0.335766
-9.22	0.363365	0.144436	0.272205	0.331594
-9.21	0.362402	0.144002	0.298724	0.339884
-9.2	0.363691	0.152791	0.310183	0.337301
-9.19	0.361227	0.140163	0.277904	0.334955
-9.18	0.362519	0.144639	0.287924	0.335829
-9.17	0.363389	0.147391	0.523165	0.335814
-9.16	0.36042	0.144353	0.25712	0.332081
-9.15	0.360179	0.161623	0.295549	0.333672
-9.14	0.360909	0.147974	0.529675	0.334644
-9.13	0.356129	0.147694	0.289772	0.324746
-9.12	0.358867	0.143199	0.139176	0.327543
-9.11	0.354946	0.141448	0.156558	0.327302
-9.1	0.353559	0.144822	0.236383	0.325729
-9.09	0.355692	0.144877	0.253784	0.326354
-9.08	0.352678	0.144361	0.0821397	0.327322
-9.07	0.35096	0.143449	0.283715	0.326316
-9.06	0.352999	0.215514	0.232033	0.331042
-9.05	0.35182	0.138324	0.301943	0.328027
-9.04	0.349543	0.122296	0.300102	0.321354
-9.03	0.35165	0.170612	0.386437	0.32059
-9.02	0.351347	0.14055	0.252217	0.322065
-9.01	0.347973	0.142438	0.290747	0.32229
-9	0.347479	0.256517	0.260691	0.318973
-8.99	0.347051	0.137468	0.449951	0.320848
-8.98	0.34968	0.142712	0.286123	0.323986
-8.97	0.348938	0.121804	0.248047	0.322037
-8.96	0.343608	0.14002	0.266391	0.322301
-8.95	0.343254	0.143914	0.217573	0.324973
-8.94	0.344931	0.146968	0.282224	0.322912
-8.93	0.341707	0.140484	0.536602	0.320204
-8.92	0.343602	0.14872	0.507374	0.317856
-8.91	0.337482	0.148492	-0.0229397	0.314807
-8.9	0.338582	0.150272	0.263122	0.320781
-8.89	0.337603	0.132207	0.267922	0.317538
-8.88	0.338277	0.141555	0.294592	0.321854
-8.87	0.335375	0.111088	0.353006	0.314765
-8.86	0.335663	0.136607	0.277998	0.314146
-8.85	0.337855	0.14057	0.217452	0.31504
-8.84	0.332969	0.137305	0.2233	0.312976
-8.83	0.335817	0.137304	0.222177	0.317053
-8.82	0.331269	0.138212	0.235129	0.3146
-8.81	0.336547	0.144744	0.214843	0.312707
-8.8	0.335902	0.150995	0.199657	0.312717
-8.79	0.335357	0.139447	0.25859	0.313465
-8.78	0.3368	0.137127	0.406907	0.313727
-8.77	0.334796	0.137792	0.197377	0.309619
-8.76	0.330635	0.137988	0.0771287	0.311076
-8.75	0.332904	0.138619	0.280839	0.311591
-8.74	0.332123	0.155014	0.375147	0.310894
-8.73	0.334574	0.141181	0.228059	0.310997
-8.72	0.330762	0.108879	0.155936	0.307538
-8.71	0.331356	0.137154	0.00887607	0.311078
-8.7	0.331754	0.147126	0.334947	0.312618
-8.69	0.327808	0.135136	0.169992	0.306659
-8.68	0.328638	0.143434	0.283311	0.309255
-8.67	0.328522	0.136088	-0.00262634	0.30885
-8.66	0.329953	0.13641	0.134581	0.306777
-8.65	0.329248	0.146523	0.23191	0.306181
-8.64	0.327721	0.139333	0.235346	0.302383
-8.63	0.32709	0.148841	0.19965	0.308528
-8.62	0.32741	0.135666	0.208113	0.307228
-8.61	0.329388	0.134629	0.480455	0.3038
-8.6	0.326819	0.147188	0.282677	0.302552
-8.59	0.32281	0.134917	0.202793	0.300349
-8.58	0.325162	0.129521	0.21934	0.308105
-8.57	0.324775	0.134094	-0.0961164	0.305572
-8.56	0.322243	0.13767	0.459764	0.302183
-8.55	0.324186	0.134092	0.198734	0.300665
-8.54	0.320469	0.13334	0.236183	0.303431
-8.53	0.323234	0.134692	-0.0247505	0.299723
-8.52	0.322908	0.136398	0.238144	0.299239
-8.51	0.317909	0.107552	0.211764	0.301808
-8.5	0.317323	0.133346	0.286982	0.299161
-8.49	0.315588	0.142693	0.300938	0.298896
-8.48	0.314433	0.0940668	0.489928	0.299362
-8.47	0.315186	0.135116	0.245252	0.303003
-8.46	0.315141	0.139156	0.199975	0.299972
-8.45	0.316022	0.133593	0.177688	0.295974
-8.44	0.315136	0.112236	-0.0055859	0.297564
-8.43	0.313301	0.133177	0.222759	0.2984
-8.42	0.314237	0.0459877	0.466155	0.300663
-8.41	0.316627	0.132362	0.148958	0.295047
-8.4	0.315398	0.131362	0.224821	0.295077
-8.39	0.31427	0.132827	0.467805	0.294984
-8.38	0.311134	0.131597	0.391829	0.295618
-8.37	0.312364	0.133199	0.244903	0.291999
-8.36	0.3116	0.133291	0.439982	0.292943
-8.35	0.308965	0.132356	0.214099	0.29365
-8.34	0.311701	0.136887	0.160744	0.290979
-8.33	0.311848	0.130125	0.20144	0.294279
-8.32	0.312744	0.135132	0.160371	0.289895
-8.31	0.308007	0.194649	0.528093	0.294157
-8.3	0.305585	0.133513	0.509272	0.29184
-8.29	0.304981	0.124808	0.184645	0.290328
-8.28	0.305859	0.132727	0.276315	0.28992
-8.27	0.306225	0.129673	0.224863	0.290915
-8.26	0.305989	0.132802	0.179196	0.287777
-8.25	0.303985	0.128247	0.169289	0.286017
-8.24	0.305814	0.143487	0.23884	0.287891
-8.23	0.306971	0.127411	0.39478	0.288497
-8.22	0.304534	0.115958	0.394583	0.292363
-8.21	0.301254	0.129968	0.28994	0.287283
-8.2	0.319447	0.131603	0.201795	0.290959
-8.19	0.320177	0.133343	0.160144	0.28822
-8.18	0.32156	0.128185	0.161838	0.284244
-8.17	0.319327	0.15208	0.223638	0.283311
-8.16	0.319764	0.130506	0.247178	0.286657
-8.15	0.321002	0.126654	0.125622	0.287694
-8.14	0.32463	0.12834	0.272298	0.282799
-8.13	0.32013	0.12592	0.465159	0.285062
-8.12	0.322639	0.12842	0.268746	0.284819
-8.11	0.322742	0.126794	0.214101	0.282308
-8.1	0.319581	0.131325	0.0572121	0.283794
-8.09	0.322587	0.129807	0.27299	0.282628
-8.08	0.319924	0.126687	0.239642	0.284038
-8.07	0.320409	0.131315	0.0548525	0.283813
-8.06	0.316914	0.138516	0.20128	0.28608
-8.05	0.317034	0.155413	0.180373	0.283749
-8.04	0.316043	0.114544	0.221749	0.283202
-8.03	0.321036	0.12569	-0.00393728	0.27547
-8.02	0.317433	0.126839	0.293277	0.280792
-8.01	0.313698	0.11951	-0.0336675	0.27861
-8	0.315418	0.126511	0.197036	0.281125
-7.99	0.318498	0.0514073	0.20101	0.278509
-7.98	0.316112	0.12458	0.509287	0.275904
-7.97	0.314087	0.124501	0.257054	0.278872
-7.96	0.314406	0.134944	0.258754	0.280403
-7.95	0.316965	0.137006	0.371274	0.277223
-7.94	0.316191	0.135737	0.161935	0.277424
-7.93	0.315017	0.125378	0.11082	0.276154
-7.92	0.31016	0.0780221	-0.038406	0.280981
-7.91	0.312323	0.126741	0.211033	0.273237
-7.9	0.307807	0.128806	-0.000617475	0.271914
-7.89	0.308678	0.116287	-0.0502779	0.277302
-7.88	0.308774	0.256618	0.30576	0.273113
-7.87	0.311162	0.123906	0.428755	0.274051
-7.86	0.309082	0.121717	0.250808	0.270059
-7.85	0.309025	0.127929	0.249182	0.271214
-7.84	0.309299	0.124024	0.116977	0.267984
-7.83	0.30451	0.125952	0.480141	0.269556
-7.82	0.314749	0.116502	0.263256	0.270618
-7.81	0.309841	0.122158	0.244765	0.27184
-7.8	0.312496	0.122641	0.25804	0.269758
-7.79	0.311114	0.128788	0.471417	0.273368
-7.78	0.306944	0.125437	0.264664	0.270339
-7.77	0.303656	0.129005	0.252618	0.274267
-7.76	0.299884	0.121897	0.250269	0.267971
-7.75	0.303511	0.125951	0.289678	0.267115
-7.74	0.301298	0.124924	0.196089	0.269457
-7.73	0.300463	0.122267	0.139911	0.268118
-7.72	0.299944	0.124916	0.21581	0.267599
-7.71	0.298949	0.103968	0.391445	0.27103
-7.7	0.300578	0.126133	0.23529	0.271058
-7.69	0.302865	0.13578	0.252773	0.270256
-7.68	0.302077	0.123379	0.15102	0.266517
-7.67	0.30007	0.129572	-0.0954714	0.267036
-7.66	0.298827	0.147113	0.0901147	0.270474
-7.65	0.296032	0.129054	0.248004	0.269487
-7.64	0.300119	0.118262	0.411963	0.267765
-7.63	0.297685	0.136806	0.239224	0.26358
-7.62	0.297509	0.124332	0.246204	0.266332
-7.61	0.294569	0.124786	0.182637	0.261393
-7.6	0.294273	0.127223	0.247294	0.268832
-7.59	0.293492	0.136352	0.354783	0.260772
-7.58	0.296863	0.122862	0.335045	0.26349
-7.57	0.289307	0.117865	0.364548	0.262075
-7.56	0.291303	0.125549	0.288572	0.263929
-7.55	0.29134	0.124248	0.181893	0.26122
-7.54	0.290043	0.120727	0.252825	0.259192
-7.53	0.290156	0.123855	0.250458	0.256528
-7.52	0.289363	0.12387	0.246026	0.259971
-7.51	0.286892	0.125086	0.274164	0.256805
-7.5	0.288597	0.125406	0.24423	0.257639
-7.49	0.287801	0.0894614	0.159256	0.258624
-7.48	0.289582	0.124232	0.248608	0.252667
-7.47	0.287811	0.126857	0.293283	0.25819
-7.46	0.289384	0.121402	0.247984	0.256507
-7.45	0.289904	0.124294	0.205739	0.259836
-7.44	0.288366	0.124584	0.248078	0.258395
-7.43	0.288466	0.121314	0.360902	0.259644
-7.42	0.28529	0.0927412	-0.0139223	0.260917
-7.41	0.284251	0.12456	0.178345	0.262816
-7.4	0.280547	0.145271	0.161371	0.258763
-7.39	0.281201	0.117223	0.23739	0.256494
-7.38	0.281886	0.0613241	0.321184	0.255493
-7.37	0.280869	0.11438	0.194765	0.256669
-7.36	0.282928	0.122946	0.147756	0.256201
-7.35	0.281859	0.121645	0.372847	0.257269
-7.34	0.281195	0.120535	0.248386	0.25605
-7.33	0.279209	0.127778	0.142502	0.254903
-7.32	0.280938	0.124977	0.239375	0.254407
-7.31	0.277956	0.120405	0.0973023	0.258605
-7.3	0.277484	0.123034	-0.0501345	0.256768
-7.29	0.278882	0.136424	0.383099	0.256196
-7.28	0.276181	0.118251	0.232788	0.253072
-7.27	0.277377	0.120432	0.185019	0.255293
-7.26	0.275442	0.124519	0.0516704	0.251842
-7.25	0.274286	0.121765	0.349453	0.252671
-7.24	0.27186	0.119826	0.200493	0.25655
-7.23	0.271136	0.121978	0.234651	0.253715
-7.22	0.271153	0.121303	0.179455	0.253315
-7.21	0.269631	0.0408064	0.397196	0.251308
-7.2	0.272031	0.125844	0.262214	0.251414
-7.19	0.27171	0.118029	0.0587429	0.254676
-7.18	0.271862	0.137517	0.170965	0.250991
-7.17	0.271845	0.106426	0.260064	0.249375
-7.16	0.27305	0.120797	0.250609	0.25026
-7.15	0.269683	0.11952	0.15541	0.250047
-7.14	0.271239	0.119843	0.320768	0.250823
-7.13	0.275136	0.118587	0.233589	0.249158
-7.12	0.268324	0.120539	0.436806	0.24885
-7.11	0.268888	0.123357	0.42927	0.250137
-7.1	0.267628	0.115022	0.237733	0.250214
-7.09	0.267379	0.12293	0.244447	0.248718
-7.08	0.267084	0.123796	0.308022	0.246672
-7.07	0.267273	0.11765	0.222609	0.249918
-7.06	0.268464	0.120246	0.247822	0.247031
-7.05	0.264814	0.114736	-0.0355673	0.248843
-7.04	0.26356	0.118782	-0.0561286	0.243836
-7.03	0.261077	0.101214	0.167231	0.245187
-7.02	0.262507	0.12656	0.352465	0.248367
-7.01	0.263701	0.119301	0.174583	0.242961
-7	0.263066	0.117424	0.235531	0.244281
-6.99	0.260283	0.118649	0.240899	0.244987
-6.98	0.263223	0.138305	0.221058	0.246278
-6.97	0.264651	0.122775	0.233234	0.242983
-6.96	0.262644	0.119087	0.260809	0.240954
-6.95	0.262182	0.118787	0.165968	0.245517
-6.94	0.262777	0.116889	0.400392	0.24138
-6.93	0.260355	0.0927937	0.232623	0.243826
-6.92	0.260214	0.117271	0.179883	0.241974
-6.91	0.261726	0.133258	0.225905	0.238932
-6.9	0.260661	0.118188	0.143419	0.243167
-6.89	0.261853	0.119216	0.225596	0.24087
-6.88	0.262037	0.116601	0.185266	0.239025
-6.87	0.261408	0.0440058	0.229223	0.241343
-6.86	0.258755	0.118734	0.22645	0.241608
-6.85	0.258944	0.120163	0.227185	0.241409
-6.84	0.257436	0.118784	0.220422	0.237244
-6.83	0.26073	0.16254	0.220029	0.240545
-6.82	0.261338	0.116615	-0.0280551	0.236638
-6.81	0.262777	0.117247	0.229392	0.23837
-6.8	0.261275	0.118055	0.218887	0.240723
-6.79	0.261877	0.114999	0.218548	0.237271
-6.78	0.26112	0.118277	0.18127	0.234518
-6.77	0.260215	0.124036	0.225984	0.237831
-6.76	0.261936	0.145659	0.40401	0.238529
-6.75	0.258797	0.116542	-0.0406993	0.23569
-6.74	0.260988	0.119444	0.241811	0.234064
-6.73	0.260541	0.146122	0.22668	0.234645
-6.72	0.260992	0.116389	0.155796	0.238601
-6.71	0.25936	0.111398	0.235528	0.235528
-6.7	0.255146	0.117616	0.152638	0.232246
-6.69	0.255838	0.118128	0.213264	0.234604
-6.68	0.258375	0.128301	0.230421	0.234803
-6.67	0.257447	0.118131	0.223768	0.23176
-6.66	0.258983	0.115467	0.218595	0.230921
-6.65	0.258518	0.117741	0.282361	0.229627
-6.64	0.255155	0.113241	-0.115082	0.23167
-6.63	0.254242	0.11501	0.292034	0.236811
-6.62	0.258298	0.117148	0.21891	0.235722
-6.61	0.252956	0.11556	0.236043	0.233218
-6.6	0.253192	0.106518	0.2205	0.232021
-6.59	0.25443	0.115989	0.368633	0.237469
-6.58	0.250871	0.116098	0.216617	0.229552
-6.57	0.252597	0.112283	0.26313	0.231786
-6.56	0.251308	0.115711	0.273272	0.232348
-6.55	0.250987	0.119036	0.215334	0.229012
-6.54	0.250647	0.11669	0.174807	0.230891
-6.53	0.251326	0.118089	0.221003	0.232311
-6.52	0.251383	0.113465	0.248461	0.230145
-6.51	0.249585	0.114852	0.227944	0.229316
-6.5	0.250252	0.115504	0.207096	0.228109
-6.49	0.249641	0.113813	0.248261	0.228969
-6.48	0.24973	0.1192	0.369638	0.228739
-6.47	0.248656	0.115863	0.201278	0.23279
-6.46	0.24726	0.11308	-0.156167	0.225899
-6.45	0.245824	0.1103	0.228436	0.226808
-6.44	0.250716	0.113576	0.224622	0.225229
-6.43	0.246566	0.113518	0.228675	0.230826
-6.42	0.245548	0.11499	0.168186	0.228759
-6.41	0.247761	0.11603	0.309635	0.228241
-6.4	0.246815	0.11731	0.207282	0.229154
-6.39	0.247028	0.0947971	0.139505	0.227722
-6.38	0.24778	0.116105	0.219731	0.227335
-6.37	0.247233	0.118446	0.209003	0.228011
-6.36	0.247199	0.115648	0.214563	0.222774
-6.35	0.246225	0.110401	0.372323	0.226271
-6.34	0.242707	0.0914108	0.205496	0.225056
-6.33	0.242034	0.113582	0.160008	0.224642
-6.32	0.244045	0.110903	0.230262	0.223468
-6.31	0.244369	0.116415	0.213161	0.224171
-6.3	0.242888	0.12285	0.209878	0.223946
-6.29	0.242417	0.108171	0.217308	0.225421
-6.28	0.240412	0.0185935	0.206202	0.223109
-6.27	0.239588	0.11054	0.446944	0.22385
-6.26	0.239774	0.116857	0.208828	0.223561
-6.25	0.242682	0.114612	0.212612	0.224192
-6.24	0.242413	0.111171	0.132646	0.224132
-6.23	0.2462	0.113367	0.244783	0.223375
-6.22	0.24088	0.114171	0.219128	0.224561
-6.21	0.240557	0.110518	0.20494	0.224819
-6.2	0.241819	0.111235	0.220237	0.223244
-6.19	0.24109	0.114749	0.1958	0.225977
-6.18	0.241594	0.09498	0.207953	0.222247
-6.17	0.240459	0.102501	0.244623	0.222003
-6.16	0.240008	0.112085	0.205891	0.224499
-6.15	0.237331	0.119389	0.213618	0.223724
-6.14	0.237177	0.121602	0.35473	0.22147
-6.13	0.238438	0.110443	0.0439834	0.223776
-6.12	0.238956	0.129563	0.205181	0.222258
-6.11	0.240057	0.0983051	0.233352	0.221795
-6.1	0.238356	0.113372	0.200546	0.218408
-6.09	0.236048	0.134927	0.208438	0.221083
-6.08	0.237165	0.113267	0.204912	0.219581
-6.07	0.236572	0.104955	0.0473116	0.218781
-6.06	0.235873	0.111517	0.203973	0.219195
-6.05	0.235518	0.112385	0.210331	0.220531
-6.04	0.233282	0.111303	0.218274	0.217112
-6.03	0.234921	0.110058	0.136888	0.21748
-6.02	0.233291	0.105696	0.323574	0.219301
-6.01	0.234873	0.110853	0.201257	0.220625
-6	0.232931	0.107389	0.188896	0.220239
-5.99	0.233084	0.114324	0.196381	0.217364
-5.98	0.232823	0.133578	0.198509	0.219558
-5.97	0.226669	0.111187	0.199938	0.214452
-5.96	0.224898	0.109797	0.208949	0.216656
-5.95	0.225147	0.11365	0.312705	0.216046
-5.94	0.223244	0.113923	0.202357	0.21747
-5.93	0.22325	0.11101	0.195294	0.219487
-5.92	0.221286	0.0328062	0.204947	0.216714
-5.91	0.223137	0.110808	0.156347	0.216601
-5.9	0.226011	0.110915	0.204296	0.215115
-5.89	0.224605	0.106563	0.20018	0.216381
-5.88	0.225645	0.109927	0.244172	0.218839
-5.87	0.224035	0.0222548	0.197063	0.217329
-5.86	0.224063	0.108938	0.00912197	0.215951
-5.85	0.223069	0.107147	0.381878	0.218061
-5.84	0.223379	0.0370092	0.196696	0.212733
-5.83	0.221961	0.109304	0.200163	0.213601
-5.82	0.22398	0.110583	0.195657	0.212573
-5.81	0.223501	0.114957	0.202485	0.216129
-5.8	0.222859	0.108945	0.17461	0.216503
-5.79	0.221546	0.108759	0.186003	0.212351
-5.78	0.220859	0.107767	0.158863	0.211118
-5.77	0.218788	0.111641	0.194442	0.210564
-5.76	0.22048	0.10825	0.123312	0.211984
-5.75	0.22017	0.109784	0.196507	0.215226
-5.74	0.218377	0.110454	0.197972	0.212201
-5.73	0.218967	0.110093	0.14984	0.214199
-5.72	0.220753	0.112975	0.335255	0.211018
-5.71	0.220013	0.109258	0.201263	0.212852
-5.7	0.220902	0.107669	0.208311	0.206789
-5.69	0.220644	0.110245	0.189374	0.210485
-5.68	0.221379	0.108705	0.225307	0.207611
-5.67	0.219229	0.109079	0.197398	0.209841
-5.66	0.220402	0.107075	0.197085	0.211474
-5.65	0.218923	-0.0201972	0.226673	0.216108
-5.64	0.219531	0.0558023	0.190655	0.212355
-5.63	0.217796	0.107564	0.195488	0.209898
-5.62	0.21928	0.0998318	0.0613097	0.206778
-5.61	0.218656	0.100873	0.291558	0.204984
-5.6	0.21811	0.107047	0.373969	0.205389
-5.59	0.217957	0.113372	0.146215	0.207341
-5.58	0.217785	0.109669	0.295709	0.208478
-5.57	0.217143	0.107216	0.195904	0.207306
-5.56	0.216637	0.10828	0.157176	0.21047
-5.55	0.217561	0.112326	-0.0139752	0.208756
-5.54	0.216172	0.109073	0.322571	0.207259
-5.53	0.21516	0.10764	0.319659	0.208365
-5.52	0.217757	0.108115	0.206634	0.204693
-5.51	0.214378	0.110821	0.202121	0.205694
-5.5	0.215427	0.107796	0.185024	0.20595
-5.49	0.215206	0.108177	0.139302	0.203499
-5.48	0.215448	0.10557	0.134764	0.206257
-5.47	0.217046	0.118301	0.187658	0.202047
-5.46	0.214893	0.107326	0.192713	0.203163
-5.45	0.216076	0.114418	0.190427	0.206501
-5.44	0.212628	0.108986	0.192672	0.202756
-5.43	0.214341	0.108756	0.18544	0.204827
-5.42	0.214111	0.105735	0.202535	0.203966
-5.41	0.212404	0.110576	0.0598636	0.20499
-5.4	0.214994	0.108691	0.199015	0.201302
-5.39	0.212848	0.104557	0.139551	0.202473
-5.38	0.213832	0.108362	0.154891	0.201266
-5.37	0.211458	0.107388	0.190834	0.205203
-5.36	0.212992	-0.0453295	0.18732	0.203446
-5.35	0.212815	0.107657	0.21501	0.203436
-5.34	0.213073	0.113561	0.0231718	0.203865
-5.33	0.210532	0.107526	0.128342	0.200005
-5.32	0.208901	0.104778	0.182733	0.203907
-5.31	0.211019	0.104236	0.13624	0.204297
-5.3	0.210965	0.163536	0.186438	0.203205
-5.29	0.211104	-0.0708823	0.192499	0.203266
-5.28	0.209931	0.105538	0.188363	0.198288
-5.27	0.209965	0.125747	0.235093	0.205463
-5.26	0.209711	0.104674	0.188161	0.200223
-5.25	0.208635	0.111724	0.175785	0.199023
-5.24	0.210537	0.10403	0.0995154	0.198919
-5.23	0.21178	0.0912147	0.330331	0.199189
-5.22	0.210356	0.102869	0.262747	0.199265
-5.21	0.20805	0.105236	0.326724	0.197629
-5.2	0.209217	0.0996709	0.199576	0.202791
-5.19	0.207582	-0.0147469	0.192446	0.199984
-5.18	0.210657	0.10423	0.174215	0.199257
-5.17	0.208989	0.103932	0.18299	0.199194
-5.16	0.209571	0.105194	0.149055	0.197736
-5.15	0.207219	0.106259	0.197365	0.200965
-5.14	0.205863	0.0878638	0.186602	0.195512
-5.13	0.208295	0.104348	0.192815	0.196234
-5.12	0.20711	0.111618	0.186176	0.198489
-5.11	0.207742	0.113394	0.0697268	0.197821
-5.1	0.204624	0.0915563	0.234698	0.199097
-5.09	0.203559	0.105961	0.176934	0.197949
-5.08	0.20497	0.10555	0.180602	0.196873
-5.07	0.207473	0.107744	0.181532	0.19486
-5.06	0.208261	0.101988	0.178698	0.194996
-5.05	0.210438	0.10702	0.144592	0.196282
-5.04	0.212158	0.105436	0.141364	0.195186
-5.03	0.212857	0.101098	0.17112	0.196982
-5.02	0.210917	0.101725	0.179211	0.195104
-5.01	0.210164	0.106774	0.236455	0.194755
-5	0.210372	0.103148	0.196033	0.196605
-4.99	0.210732	0.106021	0.244873	0.196846
-4.98	0.208158	0.0982188	0.185973	0.193192
-4.97	0.210961	0.129494	0.294629	0.196389
-4.96	0.211132	0.104926	0.187042	0.195553
-4.95	0.207576	0.103746	0.30679	0.194562
-4.94	0.208045	0.103476	-0.0229574	0.192806
-4.93	0.209524	0.104461	0.129949	0.192384
-4.92	0.209397	0.103063	0.120937	0.195362
-4.91	0.208849	0.103999	0.183226	0.194987
-4.9	0.208317	0.101429	0.0705404	0.195483
-4.89	0.208266	0.102411	0.182558	0.193441
-4.88	0.208735	0.105261	0.17304	0.192311
-4.87	0.208036	0.102677	0.071363	0.190748
-4.86	0.207632	0.10222	0.209466	0.192409
-4.85	0.208728	0.105653	0.183686	0.193301
-4.84	0.207254	0.108396	0.16723	0.190906
-4.83	0.208656	0.104832	0.181008	0.191931
-4.82	0.206215	0.0998572	0.177128	0.188545
-4.81	0.206199	0.097977	0.182681	0.192823
-4.8	0.207038	0.104377	0.175594	0.193008
-4.79	0.208059	0.0963822	0.208034	0.191083
-4.78	0.208146	0.104917	0.183246	0.191287
-4.77	0.207484	0.0968805	0.176016	0.190769
-4.76	0.206434	0.102768	0.246901	0.188573
-4.75	0.206586	0.0749584	0.175362	0.18506
-4.74	0.20589	0.102238	0.173162	0.191137
-4.73	0.208329	0.105117	0.179234	0.192365
-4.72	0.207138	0.10625	0.18567	0.189529
-4.71	0.207281	0.0999179	0.187233	0.188105
-4.7	0.20622	0.100036	0.18222	0.185515
-4.69	0.205698	0.111129	0.205284	0.184319
-4.68	0.204709	0.0761194	0.141908	0.188317
-4.67	0.204716	0.104616	0.210133	0.187626
-4.66	0.206189	0.102101	0.179612	0.186418
-4.65	0.204419	0.102694	0.178645	0.187978
-4.64	0.203161	0.100957	0.224358	0.187931
-4.63	0.202337	0.100617	0.174546	0.190187
-4.62	0.203845	0.102973	0.166463	0.188226
-4.61	0.202531	0.0754338	0.208301	0.182715
-4.6	0.203656	0.099937	-0.0360414	0.182979
-4.59	0.199557	0.0931106	0.178071	0.188307
-4.58	0.200761	0.103851	0.195014	0.186787
-4.57	0.202203	0.0993384	0.188883	0.18481
-4.56	0.201279	0.109499	0.176834	0.185511
-4.55	0.200944	0.101965	0.131664	0.184614
-4.54	0.202491	0.094282	0.191891	0.184067
-4.53	0.202556	0.0991183	0.186165	0.183051
-4.52	0.20159	0.118561	0.186779	0.184804
-4.51	0.201706	0.0976749	0.172879	0.183795
-4.5	0.198192	0.101815	0.266959	0.183742
-4.49	0.198921	0.102419	0.171986	0.180699
-4.48	0.20099	0.102897	0.0929972	0.186475
-4.47	0.200236	0.0987187	0.168928	0.182595
-4.46	0.201429	0.101113	0.175606	0.180692
-4.45	0.201152	0.100455	0.16917	0.178352
-4.44	0.200243	0.100032	0.16698	0.183796
-4.43	0.199651	0.099493	0.17342	0.180533
-4.42	0.199188	0.104784	0.175272	0.184794
-4.41	0.201258	0.132054	0.179607	0.184193
-4.4	0.201401	0.101412	0.276204	0.182188
-4.39	0.200249	0.0961425	0.170728	0.179794
-4.38	0.202019	0.100958	0.17944	0.183112
-4.37	0.199227	0.0988484	0.167307	0.183193
-4.36	0.197881	0.090415	0.173295	0.181019
-4.35	0.197471	0.103041	0.167442	0.180177
-4.34	0.197621	0.175759	-0.101563	0.181307
-4.33	0.197491	0.0996095	0.182665	0.180382
-4.32	0.196647	-0.00180236	0.164704	0.180161
-4.31	0.195914	0.117462	0.122186	0.179886
-4.3	0.197055	0.0995737	0.175282	0.18175
-4.29	0.197405	0.100444	0.165494	0.180073
-4.28	0.19733	0.0264273	0.159188	0.179313
-4.27	0.195792	0.0958234	0.205783	0.17919
-4.26	0.195484	0.0977023	0.169059	0.17994
-4.25	0.195051	0.0910967	0.197457	0.181926
-4.24	0.197722	0.0945862	0.266283	0.178391
-4.23	0.196362	0.103538	0.169811	0.178224
-4.22	0.196453	0.091728	0.19813	0.177433
-4.21	0.193127	0.0932345	0.164403	0.176485
-4.2	0.195351	0.101397	0.142693	0.179627
-4.19	0.195614	0.0930236	0.159156	0.179909
-4.18	0.195895	0.0946219	0.174678	0.181324
-4.17	0.194097	0.0929186	0.160525	0.177511
-4.16	0.194383	0.094276	0.172532	0.180987
-4.15	0.192996	0.096716	0.234675	0.177919
-4.14	0.194152	0.103175	0.16687	0.176181
-4.13	0.195383	0.102541	0.0680855	0.178851
-4.12	0.195761	0.093267	0.132842	0.179719
-4.11	0.194612	0.0935905	0.187669	0.181266
-4.1	0.192044	0.112646	0.173102	0.178518
-4.09	0.192686	0.0896798	0.141041	0.177038
-4.08	0.193141	0.0947064	0.174203	0.177015
-4.07	0.191182	0.0529673	0.149726	0.177747
-4.06	0.191775	0.0999289	0.170126	0.175848
-4.05	0.190169	0.0915568	0.168826	0.172436
-4.04	0.192312	0.0916359	0.169166	0.177689
-4.03	0.191036	0.0981269	0.165573	0.173181
-4.02	0.191953	0.0921113	0.185062	0.174854
-4.01	0.193626	0.0918288	0.164339	0.179404
-4	0.192521	0.0974616	0.176203	0.175814
-3.99	0.193075	0.0834145	0.163898	0.175948
-3.98	0.190004	0.0916871	0.0996227	0.175885
-3.97	0.190662	0.0735618	0.0123052	0.174314
-3.96	0.189087	0.0942397	0.160934	0.177026
-3.95	0.19017	0.0922463	0.163032	0.176431
-3.94	0.19118	0.0924121	0.168745	0.173215
-3.93	0.189262	0.091773	-0.0206106	0.176526
-3.92	0.189888	0.092194	0.150561	0.177748
-3.91	0.188275	0.0934048	0.156119	0.176487
-3.9	0.190586	0.0197421	0.158317	0.171923
-3.89	0.188293	0.094686	0.158043	0.176907
-3.88	0.188506	0.0912101	0.170984	0.174199
-3.87	0.191129	0.0901471	0.166722	0.175377
-3.86	0.189452	0.0951884	0.16337	0.174457
-3.85	0.189182	0.0930691	0.164379	0.172735
-3.84	0.187771	0.0927666	0.1622	0.174635
-3.83	0.190725	0.0896619	0.168148	0.175713
-3.82	0.186759	0.0910718	0.119788	0.173912
-3.81	0.186308	0.0938345	0.160509	0.170608
-3.8	0.190074	0.0925581	0.203196	0.168777
-3.79	0.193521	0.116272	0.180194	0.168501
-3.78	0.195235	0.109746	0.126195	0.1737
-3.77	0.195597	0.0916583	0.158076	0.170967
-3.76	0.196642	0.0929419	0.208362	0.168245
-3.75	0.196217	0.0967457	0.157938	0.169448
-3.74	0.1965	0.0910789	0.0969778	0.170654
-3.73	0.195751	0.0882184	0.0299366	0.171781
-3.72	0.195569	0.0963653	0.160437	0.17065
-3.71	0.196305	0.102071	0.264731	0.171644
-3.7	0.195158	0.0899172	0.163458	0.17119
-3.69	0.195772	0.0959877	0.161251	0.17184
-3.68	0.1934	0.0929348	0.167181	0.171504
-3.67	0.19275	0.0926513	0.161113	0.172032
-3.66	0.191803	0.0897283	0.158175	0.170646
-3.65	0.193576	0.100057	0.165151	0.171394
-3.64	0.19135	0.0940432	0.202323	0.169241
-3.63	0.19141	0.0890218	0.131586	0.16907
-3.62	0.193782	0.0929401	0.17237	0.168686
-3.61	0.189167	0.0883638	0.186926	0.167715
-3.6	0.192689	0.0896336	0.0491827	0.168134
-3.59	0.189377	0.0883304	0.197164	0.166039
-3.58	0.189358	0.116903	0.275647	0.170408
-3.57	0.19029	0.0898211	0.129129	0.167961
-3.56	0.191148	0.0870459	0.157528	0.169975
-3.55	0.191843	0.0877581	0.164015	0.166973
-3.54	0.191075	0.0946347	0.0712625	0.168778
-3.53	0.191538	0.0921211	0.293715	0.167205
-3.52	0.189655	0.0930229	0.116976	0.167459
-3.51	0.193025	0.0912599	0.255161	0.166966
-3.5	0.190744	0.0955398	0.153563	0.164343
-3.49	0.190892	0.0920702	0.155682	0.165099
-3.48	0.189285	0.0920563	0.1567	0.166622
-3.47	0.189613	0.0886642	0.147356	0.16623
-3.46	0.184267	0.088823	0.150039	0.164216
-3.45	0.182275	0.060981	0.156898	0.16229
-3.44	0.182614	0.0973626	0.158595	0.162922
-3.43	0.183051	0.0914838	0.162493	0.1658
-3.42	0.183231	0.0997306	0.158417	0.165411
-3.41	0.181703	0.0940462	0.207074	0.163178
-3.4	0.179544	0.111514	0.105218	0.16385
-3.39	0.179629	0.0975027	0.158629	0.159979
-3.38	0.17994	0.0934514	0.0888958	0.158932
-3.37	0.181829	0.10363	0.158224	0.159063
-3.36	0.180152	0.103721	0.164589	0.160565
-3.35	0.180495	0.080612	0.178881	0.160721
-3.34	0.17788	0.0393255	0.105078	0.159532
-3.33	0.179673	0.112152	0.180319	0.157671
-3.32	0.181851	0.0913792	0.160686	0.159074
-3.31	0.180838	0.119144	0.144948	0.161222
-3.3	0.17834	0.0938581	0.177334	0.159723
-3.29	0.177412	0.0835118	0.103906	0.159404
-3.28	0.177442	0.0865198	0.159721	0.158134
-3.27	0.178067	0.0911315	0.149323	0.158511
-3.26	0.178934	0.097715	0.185879	0.158107
-3.25	0.17771	0.0962651	0.192841	0.15801
-3.24	0.177833	0.0930698	-0.0393676	0.155179
-3.23	0.176857	0.0169484	0.160145	0.157611
-3.22	0.175689	0.0924922	0.152782	0.157122
-3.21	0.177262	0.0871866	0.158776	0.155361
-3.2	0.178505	0.091796	0.0206622	0.15691
-3.19	0.177266	0.0846797	0.159578	0.152149
-3.18	0.17534	0.0841064	0.158077	0.156483
-3.17	0.175524	0.0928182	0.183725	0.157669
-3.16	0.177109	0.0921346	0.149414	0.156468
-3.15	0.175485	0.0914548	0.0455073	0.155005
-3.14	0.173794	0.0912656	0.166666	0.158242
-3.13	0.175072	0.0929151	0.153399	0.157229
-3.12	0.174364	0.0871015	0.158296	0.157318
-3.11	0.17431	0.0919248	0.146507	0.157221
-3.1	0.175828	0.101206	0.15537	0.155909
-3.09	0.173474	0.0912684	0.173381	0.155159
-3.08	0.174755	0.0914225	0.148252	0.155075
-3.07	0.176458	0.0869212	0.168183	0.154739
-3.06	0.174176	0.0788395	0.167797	0.157667
-3.05	0.174881	0.0936087	0.145218	0.159406
-3.04	0.174354	0.077459	0.148538	0.158527
-3.03	0.173376	0.0356471	0.242095	0.158453
-3.02	0.17292	0.0860665	0.139836	0.161111
-3.01	0.174089	0.0908951	0.149908	0.15848
-3	0.172957	0.0921123	0.236976	0.162541
-2.99	0.172784	0.0898613	0.14675	0.158187
-2.98	0.175099	0.0918464	0.141667	0.161707
-2.97	0.172277	0.0868191	0.142587	0.160136
-2.96	0.172455	0.0939473	0.150915	0.158465
-2.95	0.173442	0.0296384	0.136513	0.158695
-2.94	0.174901	0.0858283	0.186559	0.160623
-2.93	0.171993	0.0909053	0.145338	0.155542
-2.92	0.172062	0.0912782	0.142769	0.157618
-2.91	0.173393	0.0909459	0.144831	0.153691
-2.9	0.171038	0.0902075	0.252499	0.1561
-2.89	0.172181	0.0947463	0.161707	0.156687
-2.88	0.170948	0.088161	0.140184	0.157734
-2.87	0.171771	0.0886755	0.135461	0.155832
-2.86	0.170722	0.0913539	0.152142	0.152701
-2.85	0.170533	0.0893071	0.0856289	0.154906
-2.84	0.171513	0.0862634	0.233173	0.155195
-2.83	0.169896	0.0410262	0.14946	0.155423
-2.82	0.169809	0.089772	0.197971	0.154838
-2.81	0.170692	0.0892919	0.1598	0.15471
-2.8	0.170059	0.0914236	0.144979	0.155781
-2.79	0.169257	0.0924295	0.146639	0.155369
-2.78	0.168076	0.0912444	0.16292	0.153733
-2.77	0.168948	0.0530439	0.131004	0.154782
-2.76	0.16929	0.089921	0.142491	0.154847
-2.75	0.170025	0.0942802	0.139054	0.154403
-2.74	0.168742	0.0937035	0.196961	0.152719
-2.73	0.167111	0.087799	0.19422	0.153415
-2.72	0.169399	0.121043	0.139589	0.154099
-2.71	0.169793	0.0890098	0.154001	0.15284
-2.7	0.169022	0.0877035	0.145098	0.154205
-2.69	0.166454	0.0869121	0.152581	0.155309
-2.68	0.165677	0.0907322	0.143926	0.154921
-2.67	0.166503	0.0892043	0.150001	0.150857
-2.66	0.166899	0.0915483	0.166075	0.152243
-2.65	0.166554	0.0601116	0.153508	0.153129
-2.64	0.167323	0.0929641	0.162411	0.152242
-2.63	0.166819	0.0852081	0.143852	0.152809
-2.62	0.164529	0.0875593	0.142393	0.153201
-2.61	0.164671	0.0904854	0.143092	0.151954
-2.6	0.164009	0.0883611	0.149134	0.150826
-2.59	0.166682	0.0894369	0.141567	0.150061
-2.58	0.167087	0.0932515	0.16558	0.154145
-2.57	0.165358	0.0888876	0.145487	0.149499
-2.56	0.164743	0.0903197	0.0473457	0.150285
-2.55	0.165869	0.0878495	0.145149	0.151994
-2.54	0.163665	0.0858343	0.145184	0.153049
-2.53	0.164566	0.0893253	0.152426	0.151282
-2.52	0.165017	0.11661	0.132832	0.152205
-2.51	0.164649	0.0865761	0.148233	0.154251
-2.5	0.164096	0.0885941	0.127211	0.150061
-2.49	0.164881	0.0859184	0.155082	0.153841
-2.48	0.168482	0.0932078	0.152788	0.153886
-2.47	0.168942	0.0986374	0.164665	0.159374
-2.46	0.172984	0.0917282	0.152992	0.159739
-2.45	0.172553	0.0981784	0.262979	0.162108
-2.44	0.175634	0.0982341	0.143066	0.167453
-2.43	0.179626	0.0976765	0.147329	0.168133
-2.42	0.181663	0.101001	0.15419	0.171592
-2.41	0.182503	0.157438	0.118856	0.175378
-2.4	0.185243	0.107652	0.160243	0.175676
-2.39	0.187662	0.106827	0.164728	0.176879
-2.38	0.188423	0.110795	0.135802	0.181391
-2.37	0.190955	0.113588	0.259447	0.1858
-2.36	0.190696	0.111413	0.167172	0.187782
-2.35	0.192893	0.111048	0.158717	0.188854
-2.34	0.195602	0.114076	0.169096	0.194919
-2.33	0.196379	0.124361	0.168792	0.193622
-2.32	0.198244	0.117188	0.12914	0.202255
-2.31	0.20118	0.122058	0.212334	0.204157
-2.3	0.203331	0.121163	0.188535	0.204067
-2.29	0.204151	0.134058	0.293562	0.209063
-2.28	0.207339	0.127671	0.24687	0.206716
-2.27	0.206173	0.130242	0.172988	0.212459
-2.26	0.209195	0.126626	-0.0851046	0.219993
-2.25	0.212609	0.122333	0.19706	0.215673
-2.24	0.215432	0.129474	0.191562	0.222557
-2.23	0.217772	0.128963	0.0717857	0.228429
-2.22	0.216885	0.0746403	0.116464	0.226028
-2.21	0.222497	0.138901	0.166892	0.232564
-2.2	0.224942	0.140792	0.299939	0.236276
-2.19	0.223968	0.121799	0.198087	0.232511
-2.18	0.224306	0.120138	0.183813	0.234058
-2.17	0.228174	0.145408	0.200005	0.235792
-2.16	0.22677	0.140377	0.199242	0.23825
-2.15	0.229304	0.140973	0.117987	0.241802
-2.14	0.229482	0.146716	0.196447	0.240499
-2.13	0.234803	0.144968	0.143879	0.246485
-2.12	0.234115	0.149402	0.190432	0.247618
-2.11	0.2368	0.140366	-0.0364042	0.252012
-2.1	0.236865	0.152106	0.20009	0.257144
-2.09	0.241072	0.148088	0.20607	0.25557
-2.08	0.238746	0.15883	0.187054	0.252134
-2.07	0.239708	0.163416	0.209831	0.252961
-2.06	0.241216	0.172778	0.167417	0.258467
-2.05	0.242076	0.15613	0.278862	0.258934
-2.04	0.244534	0.158098	0.215081	0.261546
-2.03	0.243961	0.158061	0.373528	0.261632
-2.02	0.245553	0.159032	0.206324	0.270807
-2.01	0.250557	0.158724	0.249848	0.274157
-2	0.255255	0.168377	0.111575	0.277423
-1.99	0.254365	0.142362	0.177856	0.272939
-1.98	0.255285	0.228677	0.372873	0.273441
-1.97	0.25372	0.11417	0.0936916	0.280025
-1.96	0.253891	0.115432	0.00690683	0.283245
-1.95	0.259095	0.11086	0.112764	0.281224
-1.94	0.257476	0.156171	0.216177	0.283367
-1.93	0.257217	0.167936	0.365945	0.29052
-1.92	0.260773	0.173688	0.0646409	0.286064
-1.91	0.262841	0.173551	0.290089	0.282185
-1.9	0.26344	0.195524	0.356602	0.289041
-1.89	0.264722	0.174028	0.400918	0.285519
-1.88	0.26616	0.172321	0.254191	0.28967
-1.87	0.265454	0.159777	0.0599502	0.287132
-1.86	0.270531	0.173069	0.247965	0.282632
-1.85	0.270097	0.179463	0.232788	0.284579
-1.84	0.268779	0.18046	0.346778	0.287771
-1.83	0.271011	0.190116	0.228573	0.295387
-1.82	0.273698	0.178342	0.0754855	0.293917
-1.81	0.271173	0.181449	0.00459697	0.296567
-1.8	0.275338	0.184487	0.280956	0.298247
-1.79	0.277221	0.183821	0.234563	0.296942
-1.78	0.276211	0.181519	0.151978	0.300002
-1.77	0.276905	0.183009	-0.000666318	0.300933
-1.76	0.27885	0.176276	0.222745	0.300037
-1.75	0.281387	0.177453	0.243064	0.308678
-1.74	0.282119	0.179726	0.334086	0.309241
-1.73	0.282262	0.192703	0.316695	0.311969
-1.72	0.285942	0.182173	0.23777	0.309
-1.71	0.281149	0.180989	0.00399327	0.307003
-1.7	0.280787	0.183557	0.357765	0.309411
-1.69	0.286775	0.180115	0.240409	0.305462
-1.68	0.286382	0.179286	0.23704	0.310453
-1.67	0.28906	0.188794	0.146904	0.310551
-1.66	0.289474	0.184559	0.332306	0.308684
-1.65	0.290075	0.186671	0.240899	0.311639
-1.64	0.293081	0.142583	0.20672	0.317416
-1.63	0.291591	0.186031	0.250872	0.31041
-1.62	0.291154	0.195253	0.321348	0.315434
-1.61	0.292496	0.216342	0.091201	0.315704
-1.6	0.295408	0.192626	0.180866	0.318408
-1.59	0.295309	0.191386	-0.0921034	0.321198
-1.58	0.299757	0.190843	0.201172	0.316535
-1.57	0.294486	0.188229	0.245017	0.323249
-1.56	0.295741	0.19892	0.177273	0.323078
-1.55	0.295902	0.19473	0.110782	0.323441
-1.54	0.298255	0.193211	0.257278	0.321843
-1.53	0.301336	0.0857731	0.212222	0.322869
-1.52	0.29974	0.196321	0.442597	0.322109
-1.51	0.30242	0.158861	0.249895	0.331201
-1.5	0.305906	0.206727	0.143209	0.321014
-1.49	0.307903	0.194769	0.0403347	0.34957
-1.48	0.301622	0.200518	0.258549	0.333311
-1.47	0.305527	0.172455	0.37406	0.346378
-1.46	0.309435	0.233592	0.172017	0.348123
-1.45	0.310956	0.205799	0.327299	0.35305
-1.44	0.308754	0.197825	0.417617	0.35499
-1.43	0.311317	0.224712	0.135506	0.348736
-1.42	0.308614	0.20472	0.314113	0.358303
-1.41	0.312793	0.173078	-0.0858929	0.354607
-1.4	0.308469	0.215357	0.261534	0.35248
-1.39	0.312416	0.192573	0.0425054	0.359399
-1.38	0.313009	0.205398	0.18103	0.357725
-1.37	0.315325	0.205127	0.378889	0.363288
-1.36	0.315585	0.200721	0.187693	0.36066
-1.35	0.312964	0.29998	0.236151	0.36696
-1.34	0.316324	0.208934	0.193098	0.363787
-1.33	0.322793	0.20947	0.21267	0.360672
-1.32	0.322038	-0.146647	0.378605	0.358168
-1.31	0.318757	0.213184	0.106491	0.364086
-1.3	0.317668	0.214802	-0.0524993	0.359873
-1.29	0.319259	0.21016	0.191103	0.357212
-1.28	0.314981	-0.0345047	0.271604	0.36145
-1.27	0.30646	0.189372	0.106194	0.364959
-1.26	0.302208	0.219226	0.170324	0.360947
-1.25	0.308134	0.233704	0.270126	0.365496
-1.24	0.31203	0.232519	0.195435	0.371925
-1.23	0.306727	0.228729	0.511699	0.365754
-1.22	0.30988	0.222265	0.441296	0.365904
-1.21	0.307605	0.219289	0.23252	0.372375
-1.2	0.308984	0.210136	0.195635	0.372059
-1.19	0.309896	0.229099	0.459455	0.371313
-1.18	0.312512	-0.0898952	0.220813	0.374116
-1.17	0.315433	0.227234	-0.0585904	0.368714
-1.16	0.310178	0.22726	0.246958	0.374112
-1.15	0.309997	0.0998725	0.273521	0.370261
-1.14	0.310118	0.231434	0.19808	0.369583
-1.13	0.313543	0.222578	-0.19312	0.371588
-1.12	0.317003	0.236985	0.207242	0.36592
-1.11	0.313928	0.240031	0.287666	0.369494
-1.1	0.315068	0.24845	0.274482	0.36973
-1.09	0.309629	0.147496	0.208755	0.369692
-1.08	0.314358	0.23633	0.270502	0.374455
-1.07	0.316645	0.232719	0.25574	0.372207
-1.06	0.315648	0.232475	0.275526	0.3757
-1.05	0.31726	0.230394	0.265479	0.375217
-1.04	0.314498	0.315469	0.169931	0.373109
-1.03	0.317973	0.234745	-0.0522605	0.382707
-1.02	0.31639	0.231997	0.261785	0.385727
-1.01	0.315606	0.111134	0.283521	0.381363
-1	0.318653	0.239818	0.459555	0.379172
-0.99	0.313828	0.240113	0.275796	0.375166
-0.98	0.318399	0.314273	0.283232	0.369942
-0.97	0.323354	0.23544	0.0580226	0.375747
-0.96	0.32055	0.253515	-0.00268775	0.381621
-0.95	0.320973	0.242176	0.287176	0.370815
-0.94	0.323206	0.242121	0.247579	0.376764
-0.93	0.327518	0.242709	0.229563	0.376142
-0.92	0.324732	0.242175	0.195362	0.376348
-0.91	0.325631	0.234166	0.439762	0.3725
-0.9	0.325993	0.249593	0.205833	0.377758
-0.89	0.325539	0.245256	-0.0864184	0.385843
-0.88	0.327413	0.266939	0.298056	0.37492
-0.87	0.330768	0.243972	0.472765	0.37903
-0.86	0.327824	0.269514	0.294007	0.377378
-0.85	0.335491	0.250454	0.247522	0.377808
-0.84	0.335668	0.273085	0.493787	0.390586
-0.83	0.345253	0.24528	-0.0704621	0.38664
-0.82	0.353467	0.254088	0.170459	0.379252
-0.81	0.360412	0.168892	0.273184	0.37897
-0.8	0.358859	0.252841	0.493966	0.376528
-0.79	0.361018	0.233688	0.23192	0.37536
-0.78	0.361817	0.233485	0.256801	0.376495
-0.77	0.366452	0.246941	0.304028	0.377864
-0.76	0.363258	0.274572	0.0402048	0.374471
-0.75	0.366916	0.254231	0.265044	0.385475
-0.74	0.366005	0.250537	0.204031	0.373506
-0.73	0.364708	0.246993	0.214994	0.365121
-0.72	0.361329	0.249833	0.101931	0.371189
-0.71	0.354348	0.262439	0.330203	0.363311
-0.7	0.361984	0.256582	0.288122	0.3654
-0.69	0.367156	0.26879	0.238561	0.364695
-0.68	0.362024	0.264258	-0.0512572	0.36732
-0.67	0.36739	0.228152	0.0926641	0.366243
-0.66	0.362174	0.262762	0.228623	0.372996
-0.65	0.364616	0.255951	0.279121	0.365315
-0.64	0.368343	0.254574	0.461809	0.371065
-0.63	0.36933	0.254349	0.249309	0.364098
-0.62	0.367535	0.255195	0.299563	0.36816
-0.61	0.366871	0.270582	0.516676	0.360898
-0.6	0.366082	0.261361	0.282814	0.372977
-0.59	0.367589	0.250912	0.250874	0.363357
-0.58	0.371547	0.257581	0.275264	0.369738
-0.57	0.370476	0.252383	0.257597	0.36939
-0.56	0.370847	0.25753	0.209117	0.374425
-0.55	0.36775	0.243103	0.238165	0.372432
-0.54	0.367433	0.257672	0.203636	0.378496
-0.53	0.360466	0.257559	0.264965	0.37611
-0.52	0.364342	0.264855	0.530675	0.367971
-0.51	0.358899	0.339069	0.262079	0.382761
-0.5	0.355925	0.243477	0.280835	0.373657
-0.49	0.355756	0.264912	0.173782	0.376065
-0.48	0.363679	0.262502	0.0164429	0.379963
-0.47	0.370849	0.347827	0.268048	0.380926
-0.46	0.37189	0.258395	0.259675	0.376753
-0.45	0.369759	0.263533	0.277976	0.386436
-0.44	0.373414	0.273105	0.397609	0.382994
-0.43	0.378364	0.270237	0.469652	0.383907
-0.42	0.36312	0.259492	0.306433	0.377115
-0.41	0.370951	0.27628	-0.0316701	0.380389
-0.4	0.377613	0.26142	-0.0657517	0.383575
-0.39	0.372895	0.268833	0.262382	0.385996
-0.38	0.371164	0.263104	0.246384	0.375686
-0.37	0.370992	0.268283	0.100124	0.387592
-0.36	0.374561	0.260267	0.192885	0.389257
-0.35	0.38453	0.265801	0.282857	0.380193
-0.34	0.382741	0.266323	0.201354	0.383969
-0.33	0.376688	0.264289	0.294934	0.378388
-0.32	0.38128	0.267866	0.302544	0.370791
-0.31	0.387676	0.247557	0.281718	0.371061
-0.3	0.38116	0.263047	0.166138	0.368107
-0.29	0.380787	0.263933	0.295173	0.367984
-0.28	0.379415	0.250531	0.262065	0.362196
-0.27	0.378549	0.259067	0.282361	0.369798
-0.26	0.383415	0.260245	0.0938304	0.373348
-0.25	0.375554	0.272903	0.0235576	0.36916
-0.24	0.37782	0.261105	0.233341	0.369973
-0.23	0.379734	0.261549	0.292734	0.363991
-0.22	0.37826	0.234428	0.222863	0.372959
-0.21	0.381374	0.266625	0.241346	0.369624
-0.2	0.394508	0.294735	0.287665	0.369686
-0.19	0.384339	0.273456	-0.185381	0.371472
-0.18	0.377356	0.268362	0.242008	0.374441
-0.17	0.385446	-0.00791333	0.24299	0.369604
-0.16	0.384392	0.264377	0.288075	0.372877
-0.15	0.379503	0.274133	0.233149	0.371572
-0.14	0.377934	0.40157	0.496878	0.376634
-0.13	0.380196	0.270594	0.255783	0.367239
-0.12	0.379809	0.243065	0.364982	0.369133
-0.11	0.374793	0.285544	0.369275	0.36684
-0.1	0.374988	0.286702	0.378949	0.359756
-0.09	0.376074	0.298297	0.382491	0.367304
-0.08	0.384053	0.334015	0.387147	0.370575
-0.07	0.385394	0.288955	0.391194	0.373401
-0.06	0.380544	0.296417	0.389858	0.370172
-0.05	0.383549	0.295327	0.396304	0.371536
-0.04	0.378982	0.283961	0.397501	0.379618
-0.03	0.387559	0.290687	0.396109	0.37146
-0.02	0.386167	0.28959	0.398331	0.376487
-0.01	0.377772	0.27089	0.406413	0.369243
0	0.37977	0.0274305	0.404412	0.368741
0.01	0.245907	0.183148	0.280121	0.274003
0.02	0.174431	0.115522	0.228417	0.188507
0.03	0.151408	0.109573	0.187844	0.167944
0.04	0.153623	0.119605	0.525179	0.190578
0.05	0.161353	0.13252	0.078463	0.213425
0.06	0.169795	0.149989	0.268117	0.235794
0.07	0.17982	0.164282	0.311797	0.258979
0.08	0.189871	0.183616	0.336432	0.278141
0.09	0.198205	0.184956	0.357461	0.299746
0.1	0.211874	0.202331	0.384572	0.320109
0.11	0.222693	0.246595	0.385334	0.348806
0.12	0.232165	0.232483	0.404921	0.370189
0.13	0.247072	0.251762	0.426343	0.395383
0.14	0.259282	0.267085	0.445733	0.421258
0.15	0.272952	0.249813	0.462256	0.441649
0.16	0.288967	0.2939	0.48437	0.469812
0.17	0.301045	0.317047	0.503234	0.50268
0.18	0.317065	0.319711	0.526791	0.52105
0.19	0.32805	0.348699	0.550954	0.551935
0.2	0.35458	0.272714	0.569507	0.599175
0.21	0.371241	0.367278	0.591499	0.620891
0.22	0.376427	0.382298	0.600231	0.644934
0.23	0.388685	0.394268	0.62718	0.667651
0.24	0.419611	0.406255	0.645099	0.708148
0.25	0.426825	0.420161	0.667484	0.731791
0.26	0.451711	0.436443	0.685663	0.77138
0.27	0.458437	0.449684	0.71201	0.801036
0.28	0.46878	0.463768	0.741995	0.82064
0.29	0.508123	0.478374	0.763591	0.834899
0.3	0.516571	0.49525	0.783248	0.890881
0.31	0.518366	0.509778	0.810406	0.913306
0.32	0.54079	0.522381	0.823821	0.927996
0.33	0.561872	0.535898	0.861357	0.917107
0.34	0.562986	0.549468	0.876574	0.937593
0.35	0.579842	0.562615	0.896554	0.967505
0.36	0.586294	0.578345	0.911949	0.996325
0.37	0.608947	0.590123	0.955569	1.02336
0.38	0.634589	0.609992	0.988366	1.06021
0.39	0.656554	0.626914	1.02256	1.08584
0.4	0.694593	0.635023	1.02259	1.13677
0.41	0.750286	0.64911	1.06485	1.13337
0.42	0.76885	0.65705	1.09911	1.16983
0.43	0.775199	0.670392	1.11314	1.21065
0.44	0.782335	0.698543	1.15989	1.23816
0.45	0.795378	0.704361	1.17005	1.2767
0.46	0.813714	0.715759	1.19764	1.3068
0.47	0.831161	0.736409	1.22942	1.35391
0.48	0.844475	0.738676	1.24373	1.35636
0.49	0.868624	0.747511	1.28417	1.41051
0.5	0.901405	0.774817	1.32485	1.43591
0.51	0.926846	0.787157	1.3308	1.4904
0.52	0.931614	0.799436	1.35526	1.5235
0.53	0.953578	0.816438	1.42883	1.54514
0.54	0.970948	0.819909	1.43591	1.56696
0.55	0.987656	0.846856	1.47624	1.60771
0.56	1.0172	0.854839	1.4715	1.63294
0.57	1.04307	0.87548	1.51417	1.6613
0.58	1.05587	0.883574	1.54415	1.66379
0.59	1.07899	0.901444	1.56654	1.72072
0.600001	1.08999	0.914778	1.59225	1.72667
0.610001	1.12276	0.935856	1.63687	1.77386
0.620001	1.13635	0.938295	1.66874	1.79839
0.630001	1.15225	0.951938	1.69633	1.82036
0.640001	1.18446	0.958164	1.70494	1.87993
0.650001	1.17502	0.987642	1.74152	1.91055
0.660001	1.25206	0.999594	1.7275	1.94905
0.670001	1.30364	0.992856	1.7895	1.99325
0.680001	1.33585	1.02251	1.83967	1.99652
0.690001	1.34563	1.02561	1.84461	2.02889
0.700001	1.30093	1.0591	1.88863	2.06358
0.710001	1.36828	1.06827	1.91638	2.10569
0.720001	1.4188	1.08813	1.96583	2.15416
0.730001	1.42671	1.09269	2.0022	2.11605
0.740001	1.39419	1.09712	2.03737	2.18183
0.750001	1.47978	1.10671	2.0567	2.22095
0.760001	1.49459	1.13068	1.99223	2.2728
0.770001	1.49794	1.15292	1.96528	2.29599
0.780001	1.51402	1.1657	1.92179	2.34329
0.790002	1.53816	1.18106	1.94009	2.37385
0.800002	1.53238	1.18784	2.03057	2.38754
0.810002	1.55756	1.16162	2.22355	2.40819
0.820002	1.59513	1.17661	2.28817	2.50906
0.830002	1.61149	1.20669	2.31	2.45314
0.840002	1.64611	1.20589	2.36752	2.47267
0.850002	1.65493	1.20438	2.40038	2.59472
0.860002	1.6856	1.21227	2.41787	2.56157
0.870002	1.69323	1.221	2.47613	2.61616
0.880002	1.74486	1.22739	2.49573	2.64969
0.890002	1.8253	1.25074	2.5602	2.66655
0.900002	1.95764	1.2724	2.59302	2.70261
0.910002	1.9838	1.28247	2.59839	2.75183
0.920002	2.01975	1.29638	2.61646	2.78816
0.930002	2.04181	1.2914	2.64877	2.77727
0.940002	2.08868	1.31659	2.68072	2.83213
0.950002	2.10473	1.33178	2.75233	2.90238
0.960002	2.1269	1.33951	2.79126	2.88367
0.970003	2.13248	1.34543	2.76023	2.87896
0.980003	2.1657	1.34992	2.8131	2.96089
0.990003	2.19738	1.3583	2.86523	3.01363
1	2.22776	1.38115	2.86861	3.02463
1.01	2.22193	1.37718	2.88247	3.03658
1.02	2.25704	1.41338	2.95121	3.05986
1.03	2.27689	1.43898	2.97933	3.07703
1.04	2.31622	1.45856	2.99741	3.12886
1.05	2.30362	1.46361	3.01301	3.17242
1.06	2.38341	1.48437	3.03614	3.19234
1.07	2.36941	1.48348	3.0735	3.20168
1.08	2.41718	1.50062	3.07634	3.24986
1.09	2.42519	1.5066	3.0889	3.25991
1.1	2.43008	1.52683	3.12022	3.31186
1.11	2.4427	1.53353	3.20783	3.35575
1.12	2.45239	1.52748	3.15476	3.37325
1.13	2.46986	1.5415	3.19759	3.33987
1.14	2.53306	1.56349	3.22984	3.42289
1.15	2.56171	1.56057	3.26456	3.52859
1.16	2.58166	1.57848	3.35097	3.47979
1.17	2.58993	1.59901	3.34923	3.56719
1.18	2.62438	1.58764	3.37994	3.54421
1.19	2.5845	1.6002	3.3892	3.55632
1.2	2.62901	1.60378	3.44594	3.58091
1.21	2.67899	1.63373	3.47514	3.60653
1.22	2.69186	1.60984	3.49369	3.59818
1.23	2.71811	1.61877	3.52254	3.6669
1.24	2.69911	1.65989	3.50673	3.66214
1.25	2.75316	1.6633	3.52266	3.71719
1.26	2.79929	1.64691	3.56247	3.72526
1.27	2.79572	1.67515	3.54734	3.79098
1.28	2.81833	1.68869	3.57977	3.84702
1.29	2.85948	1.70208	3.64734	3.85385
1.3	2.89713	1.70375	3.71025	3.82777
1.31	2.96149	1.72211	3.74266	3.89966
1.32	2.92345	1.74554	3.69586	3.85976
1.33	2.92635	1.74478	3.72596	3.91155
1.34	2.94057	1.74942	3.76905	3.9538
1.35	2.94992	1.75365	3.76147	4.00567
1.36	2.96148	1.76798	3.76982	4.01815
1.37	3.00777	1.77215	3.82372	4.02198
1.38	3.01392	1.76534	3.8301	4.01632
1.39	3.01469	1.75484	3.84408	4.078
1.4	3.02543	1.75832	3.89292	4.08096
1.41	3.02905	1.78185	3.93517	4.15551
1.42	3.05721	1.78462	3.98923	4.08309
1.43	3.09757	1.80402	3.94826	4.10824
1.44001	3.14508	1.80071	3.97637	4.16227
1.45001	3.14334	1.81288	3.99444	4.23058
1.46001	3.18297	1.83068	3.99663	4.20812
1.47001	3.20397	1.82845	4.01958	4.16907
1.48001	3.18627	1.82412	4.08775	4.23185
1.49001	3.23117	1.83893	4.10009	4.25912
1.50001	3.20718	1.87045	4.09793	4.26693
1.51001	3.21982	1.8595	4.13498	4.2582
1.52001	3.2693	1.87513	4.12233	4.37429
1.53001	3.30416	1.89593	4.26324	4.3226
1.54001	3.27799	1.9009	4.20093	4.39446
1.55001	3.29551	1.89684	4.29115	4.354
1.56001	3.31041	1.89272	4.23878	4.31769
1.57001	3.37611	1.91631	4.23971	4.46176
1.58001	3.41098	1.93165	4.22796	4.45007
1.59001	3.43441	1.93004	4.21538	4.54763
1.60001	3.38145	1.93744	4.25156	4.53142
1.61001	3.42573	1.95057	4.33623	4.57692
1.62001	3.4301	1.96688	4.30406	4.51764
1.63001	3.43304	1.98144	4.29527	4.5968
1.64001	3.44521	1.96915	4.3855	4.67316
1.65001	3.46727	1.99415	4.3984	4.64527
1.66001	3.52087	2.00233	4.37575	4.64508
1.67001	3.52835	2.0112	4.38631	4.6631
1.68001	3.48605	1.99861	4.47421	4.65036
1.69001	3.49661	2.01831	4.44661	4.64078
1.70001	3.51239	2.0277	4.51118	4.70387
1.71001	3.5727	2.03663	4.47449	4.70013
1.72001	3.59419	2.01933	4.49228	4.76683
1.73001	3.6189	2.06038	4.54053	4.72409
1.74001	3.66844	2.0571	4.55032	4.7898
1.75001	3.58593	2.09235	4.53129	4.83744
1.76001	3.62654	2.07158	4.54574	4.78431
1.77001	3.68208	2.06106	4.59774	4.92115
1.78001	3.6448	2.07272	4.70001	4.92458
1.79001	3.67675	2.06755	4.63396	4.91842
1.80001	3.74215	2.09875	4.64992	5.00755
1.81001	3.73637	2.08179	4.60906	4.95921
1.82001	3.74819	2.08298	4.72104	5.04408
1.83001	3.73021	2.09397	4.74514	5.01544
1.84001	3.69832	2.11904	4.68037	5.04519
1.85001	3.78557	2.10743	4.74862	5.03481
1.86001	3.78148	2.13556	4.77635	5.05125
1.87001	3.84767	2.1503	4.76125	5.08159
1.88001	3.84997	2.15327	4.82446	5.08254
1.89001	3.85853	2.18979	4.83299	5.06215
1.90001	3.81659	2.17522	4.7332	5.04668
1.91001	3.88405	2.18346	4.77	5.04505
1.92001	3.88087	2.19044	4.77447	5.09968
1.93001	3.86773	2.18976	4.82359	5.14938
1.94001	3.88302	2.18409	4.80698	5.1288
1.95001	3.88138	2.19597	4.8934	5.1448
1.96001	3.89969	2.21207	4.93619	5.15859
1.97001	3.87589	2.21946	4.91851	5.24737
1.98001	3.95022	2.21007	4.91242	5.31547
1.99001	3.91391	2.25897	4.8373	5.24846
2.00001	3.92778	2.2302	4.97631	5.20336
2.01001	3.94596	2.24504	4.92031	5.33877
2.02001	3.93939	2.27608	4.95165	5.25512
2.03001	3.99752	2.2561	5.03621	5.32583
2.04001	3.98812	2.28806	5.0539	5.27772
2.05001	4.04813	2.25063	5.05803	5.30835
2.06001	4.01155	2.27006	5.01199	5.41408
2.07001	4.02974	2.29142	4.97805	5.39151
2.08001	4.03108	2.28024	5.05901	5.34411
2.09001	4.04569	2.28513	5.0569	5.34808
2.10001	4.04756	2.28001	5.15267	5.34328
2.11001	4.04188	2.27139	5.117	5.43278
2.12001	4.11029	2.29666	5.07138	5.41366
2.13001	4.13156	2.32376	5.09783	5.39294
2.14001	4.12233	2.313	5.18422	5.45335
2.15001	4.13897	2.32418	5.17909	5.45987
2.16001	4.11686	2.33938	5.1546	5.43058
2.17001	4.13106	2.34432	5.15431	5.42077
2.18001	4.15074	2.34102	5.20766	5.46466
2.19001	4.10303	2.32037	5.24897	5.486
2.20001	4.15952	2.33196	5.2559	5.42556
2.21001	4.1736	2.35341	5.22201	5.50514
2.22001	4.15949	2.35903	5.2797	5.4634
2.23001	4.19211	2.3583	5.29129	5.48938
2.24001	4.1948	2.36692	5.25823	5.5127
2.25001	4.16107	2.37947	5.24936	5.51913
2.26001	4.20605	2.35007	5.34587	5.58272
2.27001	4.21725	2.38597	5.32515	5.59455
2.28001	4.25168	2.37384	5.36184	5.5101
2.29001	4.26748	2.40382	5.32231	5.64398
2.30001	4.25955	2.41563	5.35314	5.57512
2.31001	4.32323	2.40243	5.3451	5.61852
2.32001	4.31585	2.4085	5.35779	5.67598
2.33001	4.3489	2.41863	5.32111	5.6068
2.34001	4.32604	2.4014	5.39378	5.65041
2.35001	4.33172	2.44419	5.3985	5.69496
2.36001	4.33247	2.44388	5.44052	5.69767
2.37001	4.35521	2.44714	5.42753	5.66706
2.38001	4.39545	2.44102	5.39589	5.69096
2.39001	4.34409	2.45649	5.40339	5.71636
2.40001	4.40561	2.44047	5.39363	5.74564
2.41001	4.40374	2.44459	5.44349	5.69992
2.42001	4.39562	2.47143	5.47488	5.71545
2.43001	4.43298	2.44704	5.4293	5.70233
2.44001	4.41613	2.48371	5.40547	5.73861
2.45001	4.36275	2.47155	5.52748	5.76001
2.46001	4.40489	2.50283	5.49551	5.82055
2.47001	4.43955	2.50855	5.53478	5.8701
2.48001	4.41658	2.4728	5.5301	5.82058
2.49001	4.37646	2.48819	5.48473	5.86754
2.50001	4.44603	2.3995	5.54757	5.8561
2.51001	4.44558	2.44766	5.54493	5.83839
2.52001	4.48845	2.45236	5.55818	5.86329
2.53001	4.45341	2.43501	5.63091	5.88705
2.54001	4.46721	2.4464	5.64075	5.84954
2.55001	4.45241	2.43995	5.6193	5.93144
2.56001	4.4714	2.45187	5.63956	5.98085
2.57001	4.46032	2.46144	5.64964	5.97265
2.58001	4.58184	2.46291	5.62638	5.83668
2.59001	4.52898	2.46859	5.61883	5.94039
2.60001	4.54308	2.45615	5.57884	5.96661
2.61001	4.53341	2.49196	5.69622	5.90028
2.62001	4.49872	2.48122	5.54818	5.97747
2.63001	4.54191	2.48456	5.705	5.91391
2.64001	4.56637	2.47914	5.69509	6.03339
2.65001	4.54945	2.49108	5.58276	6.05336
2.66001	4.62705	2.51097	5.64245	6.0509
2.67001	4.62188	2.52703	5.74764	6.06213
2.68001	4.65644	2.52445	5.72161	5.9902
2.69001	4.70441	2.54775	5.69972	5.99356
2.70001	4.56825	2.54991	5.72768	5.94488
2.71001	4.62294	2.56209	5.77802	6.02328
2.72001	4.71221	2.52932	5.73539	6.11615
2.73001	4.68654	2.51004	5.69525	6.06909
2.74001	4.62739	2.53377	5.72286	6.0892
2.75001	4.68183	2.54527	5.80401	6.01241
2.76001	4.67985	2.5761	5.82101	6.06294
2.77001	4.63134	2.58521	5.77813	6.08848
2.78001	4.72029	2.58094	5.77285	6.15019
2.79001	4.71295	2.59009	5.85742	6.1038
2.80001	4.73541	2.59701	5.75464	6.0852
2.81001	4.74342	2.59312	5.86554	6.12883
2.82001	4.67331	2.59854	5.76413	6.18189
2.83001	4.65193	2.6089	5.85838	6.12814
2.84001	4.728	2.63468	5.83397	6.10222
2.85001	4.84442	2.64207	5.85541	6.1399
2.86001	4.78076	2.68208	5.90533	6.17018
2.87001	4.71736	2.66668	5.8921	6.16755
2.88001	4.77157	2.63669	5.88102	6.24414
2.89001	4.84397	2.65276	5.90055	6.23698
2.90001	4.85028	2.67235	5.95323	6.27696
2.91001	4.74873	2.66432	5.94124	6.24429
2.92001	4.73716	2.66015	5.93687	6.288
2.93001	4.79064	2.67599	5.87762	6.21394
2.94001	4.72362	2.69724	5.9255	6.21328
2.95001	4.83104	2.65842	5.9201	6.30586
2.96001	4.925	2.68544	5.94652	6.36837
2.97001	4.83179	2.69324	5.9166	6.34037
2.98001	4.80753	2.71141	5.8695	6.39622
2.99001	4.79824	2.71411	5.93124	6.48989
3.00001	4.87804	2.71442	5.99889	6.43453
3.01001	4.89343	2.72673	6.05406	6.35951
3.02001	4.83987	2.72975	5.98016	6.39078
3.03001	4.85965	2.71943	6.00453	6.46435
3.04001	4.85042	2.72578	6.02011	6.4374
3.05001	4.8524	2.68741	6.02532	6.48313
3.06001	4.89607	2.73491	5.98539	6.38189
3.07001	4.87445	2.74252	5.98314	6.44392
3.08001	4.83735	2.73234	5.95242	6.39282
3.09001	4.84891	2.73646	6.07612	6.46756
3.10001	4.9415	2.73118	6.08553	6.45683
3.11001	4.95111	2.75882	6.05988	6.47887
3.12001	4.8816	2.74715	6.14694	6.48194
3.13001	4.86694	2.7461	6.17772	6.38354
3.14001	4.88938	2.74993	6.01462	6.41612
3.15001	4.95487	2.72789	6.04442	6.5384
3.16001	4.94496	2.73024	6.09732	6.62043
3.17001	4.9629	2.75579	6.04313	6.51953
3.18001	4.95236	2.74276	6.06035	6.49002
3.19001	4.97033	2.74874	6.09933	6.47919
3.20001	4.87587	2.7508	6.1684	6.53462
3.21001	4.8666	2.79899	6.10228	6.52538
3.22001	4.99003	2.79419	6.11306	6.63404
3.23001	4.98864	2.78	6.1031	6.44498
3.24001	5.00459	2.7777	6.0957	6.53427
3.25001	4.97731	2.78794	6.12396	6.53828
3.26001	5.02349	2.78319	6.17953	6.56353
3.27001	5.02081	2.75303	6.16123	6.57078
3.28001	4.95871	2.78204	6.1847	6.54511
3.29001	5.01011	2.8211	6.18213	6.53345
3.30001	5.00831	2.79729	6.25998	6.57933
3.31001	5.07483	2.79015	6.18933	6.59537
3.32002	5.00225	2.81379	6.00854	6.5607
3.33002	5.04261	2.80465	6.11256	6.63478
3.34002	5.04378	2.77882	6.19863	6.58106
3.35002	5.01734	2.80248	6.16373	6.62907
3.36002	4.98572	2.81817	6.21249	6.60167
3.37002	5.07045	2.83382	6.20191	6.54527
3.38002	5.09652	2.84761	6.24369	6.6399
3.39002	5.07854	2.82185	6.20801	6.6236
3.40002	5.04018	2.82131	6.28642	6.59851
3.41002	5.1256	2.82546	6.24457	6.6475
3.42002	5.16507	2.82108	6.22981	6.68837
3.43002	5.18248	2.82273	6.35289	6.68862
3.44002	5.08314	2.84012	6.34104	6.65362
3.45002	5.13406	2.83222	6.24069	6.69287
3.46002	5.03936	2.8093	6.27979	6.55052
3.47002	5.13176	2.82227	6.14993	6.6885
3.48002	5.1646	2.84852	6.26242	6.63516
3.49002	5.11938	2.84533	6.4294	6.63518
3.50002	5.11165	2.82413	6.33555	6.62224
3.51002	5.1456	2.83223	6.31357	6.75504
3.52002	5.13282	2.8261	6.32965	6.64286
3.53002	5.1334	2.87285	6.3559	6.69671
3.54002	5.1347	2.86398	6.31248	6.72991
3.55002	5.11125	2.84664	6.33332	6.70677
3.56002	5.20199	2.86021	6.40204	6.7041
3.57002	5.16057	2.85749	6.39828	6.72014
3.58002	5.14193	2.85067	6.35941	6.79359
3.59002	5.15458	2.87231	6.31889	6.81334
3.60002	5.16963	2.89123	6.25556	6.7732
3.61002	5.16923	2.8773	6.35954	6.75214
3.62002	5.13775	2.86583	6.28006	6.75482
3.63002	5.23666	2.90545	6.4176	6.74683
3.64002	5.17489	2.89527	6.37399	6.8147
3.65002	5.17815	2.89765	6.33966	6.77091
3.66002	5.1841	2.89877	6.51111	6.75973
3.67002	5.23717	2.89722	6.28453	6.70888
3.68002	5.21708	2.89238	6.39565	6.73398
3.69002	5.23139	2.92108	6.3389	6.71274
3.70002	5.20457	2.91967	6.3539	6.77028
3.71002	5.2607	2.90467	6.42246	6.85042
3.72002	5.22285	2.92573	6.40656	6.80241
3.73002	5.24888	2.90875	6.43025	6.85348
3.74002	5.22752	2.95677	6.35768	6.67282
3.75002	5.23239	2.93481	6.38199	6.75956
3.76002	5.25136	2.9424	6.40569	6.76201
3.77002	5.30633	2.9699	6.42023	6.7443
3.78002	5.28592	2.94551	6.41732	6.78091
3.79002	5.26463	2.93877	6.4921	6.82764
3.80002	5.16724	2.95187	6.43543	6.8702
3.81002	5.26895	2.93979	6.37893	6.88439
3.82002	5.2448	2.92814	6.38742	6.82206
3.83002	5.29833	2.94851	6.40126	6.78623
3.84002	5.27899	2.96289	6.41241	6.70701
3.85002	5.22625	2.98248	6.42187	6.67482
3.86002	5.27316	2.97184	6.44538	6.79661
3.87002	5.25165	2.9893	6.46431	6.89083
3.88002	5.25779	2.94185	6.45343	6.77171
3.89002	5.30905	2.98042	6.33597	6.81093
3.90002	5.27738	2.99462	6.44212	6.91988
3.91002	5.27294	2.98073	6.44886	6.88265
3.92002	5.28826	2.98933	6.64202	6.82556
3.93002	5.27892	2.96729	6.47743	6.93482
3.94002	5.302	2.97292	6.50367	6.89809
3.95002	5.29803	2.98183	6.46578	6.94556
3.96002	5.3763	2.97006	6.45644	7.00082
3.97002	5.32034	2.99875	6.46877	6.91622
3.98002	5.32006	3.00571	6.56243	6.91057
3.99002	5.32085	2.97876	6.48406	6.81479
4.00002	5.26541	3.00312	6.4121	6.82196
4.01002	5.35629	2.98858	6.47987	6.84293
4.02002	5.33685	3.00029	6.45583	6.84249
4.03002	5.30283	2.99721	6.42675	6.91313
4.04002	5.30472	2.98125	6.42959	6.95649
4.05002	5.28361	3.00514	6.48846	6.92921
4.06002	5.23276	3.01506	6.47817	6.9596
4.07002	5.26504	2.99049	6.52027	6.84587
4.08002	5.23769	3.00265	6.42442	6.86331
4.09002	5.33583	2.99441	6.4266	6.98018
4.10002	5.36866	3.00405	6.43832	7.02102
4.11002	5.38933	3.01554	6.53783	6.95739
4.12002	5.2988	3.03601	6.52886	7.01544
4.13002	5.31604	3.03548	6.53686	7.01033
4.14002	5.32989	3.04253	6.4255	6.98758
4.15002	6.09005	3.10616	6.47578	7.01915
4.16002	5.37142	2.9976	6.6062	6.97616
4.17002	5.34695	2.99581	6.57632	6.99253
4.18002	5.38775	2.98931	6.49316	6.89801
4.19002	5.32308	2.97135	6.54151	6.90643
4.20002	5.30341	2.98532	6.61096	6.97133
4.21002	5.34097	3.01957	6.52733	6.95473
4.22002	5.34706	3.00868	6.59118	7.03107
4.23002	5.31256	3.0456	6.52952	6.92975
4.24002	5.34766	3.04508	6.60876	6.98656
4.25002	5.33532	3.00526	6.54167	7.05332
4.26002	5.361	3.0192	6.44051	6.91497
4.27002	5.41078	3.03967	6.57933	6.93909
4.28002	5.5066	3.00262	6.54137	6.96476
4.29002	5.4306	3.04269	6.65155	6.92115
4.30002	5.49615	3.03254	6.63629	6.90675
4.31002	5.54478	2.9918	6.63942	6.9398
4.32002	5.48233	3.02345	6.64182	6.98556
4.33002	5.56895	3.01402	6.60095	6.9392
4.34002	5.41575	3.03355	6.6002	6.94771
4.35002	5.50853	3.05004	6.71541	6.94618
4.36002	5.52906	3.05816	6.67026	7.05373
4.37002	5.53017	3.03162	6.68508	7.03171
4.38002	5.48815	3.03676	6.77088	6.97252
4.39002	5.41828	3.04958	6.63482	7.02603
4.40002	5.51894	3.06363	6.64595	7.09155
4.41002	5.48939	3.04744	6.69504	7.02126
4.42002	5.45823	3.04447	6.73919	6.9836
4.43002	5.4042	3.0328	6.77213	6.94749
4.44002	5.44206	3.04635	6.72603	6.99247
4.45002	5.4476	3.02937	6.71824	6.96444
4.46002	5.49001	3.03419	6.74996	7.0428
4.47002	5.41244	3.07376	6.70415	7.03402
4.48002	5.47204	3.09974	6.70854	7.07519
4.49002	5.50085	3.06522	6.73795	7.04965
4.50002	5.46267	3.1006	6.67973	6.95622
4.51002	5.45491	3.08405	6.66925	7.07417
4.52002	5.4568	3.05624	6.74391	7.03607
4.53002	5.52938	3.0926	6.73958	6.98504
4.54002	5.41322	3.08807	6.88472	6.96752
4.55002	5.46883	3.0909	6.71503	6.98846
4.56002	5.49967	3.11025	6.83797	7.17451
4.57002	5.48741	3.10841	6.75801	7.08604
4.58002	5.51344	3.11109	6.80313	6.99486
4.59002	5.47628	3.14406	6.73387	7.08762
4.60002	5.42841	3.17138	6.73956	7.08828
4.61002	5.46679	3.15791	6.81305	7.05266
4.62002	5.46352	3.16838	6.79692	7.08211
4.63002	5.4295	3.1886	6.77492	7.12557
4.64002	5.52786	3.15063	6.73984	7.07769
4.65002	5.52512	3.17877	6.79382	7.07863
4.66002	5.55077	3.14214	6.75669	7.04901
4.67002	5.45738	3.13426	6.84905	7.11959
4.68002	5.51409	3.16009	6.82907	7.1229
4.69002	5.52058	3.16875	6.78346	7.12764
4.70002	5.52491	3.16354	6.82605	7.09349
4.71002	5.53968	3.18238	6.77782	7.11916
4.72002	5.51656	3.16002	6.88059	7.18116
4.73002	5.53107	3.17343	6.77195	7.12743
4.74002	5.54908	3.14392	6.81703	7.08038
4.75002	5.38963	3.18631	6.78577	7.16059
4.76002	5.52585	3.15224	6.81569	7.09015
4.77002	5.55155	3.17786	6.86283	7.15964
4.78002	5.55339	3.18277	6.88435	7.20297
4.79002	5.53034	3.18955	6.78945	7.18769
4.80002	5.59764	3.16587	6.89941	7.15313
4.81002	5.59383	3.18606	6.83803	7.07241
4.82002	5.59106	3.19544	6.86785	7.05715
4.83002	5.46663	3.19163	6.83972	7.20572
4.84002	5.54552	3.20544	6.96019	7.21645
4.85002	5.51875	3.1975	6.94325	7.26238
4.86002	5.52829	3.17018	6.87179	7.22146
4.87002	5.58634	3.15861	6.85206	7.12549
4.88002	5.61554	3.16811	6.91703	7.11198
4.89002	5.55842	3.1869	6.91049	7.27795
4.90002	5.61485	3.19879	6.89962	7.21908
4.91002	5.54719	3.20296	6.89651	7.2187
4.92002	5.50989	3.16873	6.87998	7.23559
4.93002	5.41012	3.19727	6.96047	7.20446
4.94002	5.39194	3.1999	6.94957	7.246
4.95002	5.50659	3.21029	6.94853	7.29113
4.96002	5.41371	3.20876	6.96541	7.23934
4.97002	5.44733	3.18787	6.94511	7.24558
4.98002	5.46503	3.15507	6.99448	7.1848
4.99002	5.47543	3.19297	7.0084	7.22552
5.00002	5.47345	3.17957	7.02528	7.29238
5.01002	5.42154	3.1756	6.92009	7.34479
5.02002	5.37302	3.18432	6.91331	7.23009
5.03002	5.38659	3.20674	6.96691	7.22764
5.04002	5.43326	3.17833	7.00743	7.28966
5.05002	5.44743	3.17933	6.94868	7.30328
5.06002	5.47143	3.19383	6.99445	7.29515
5.07002	5.42529	3.19169	6.95479	7.2911
5.08002	5.43993	3.20114	6.9755	7.23395
5.09002	5.40126	3.19224	6.99299	7.30375
5.10002	5.45234	3.19727	6.93157	7.35007
5.11002	5.46361	3.19153	7.00076	7.36243
5.12002	5.41694	3.1879	6.90517	7.36205
5.13002	5.48729	3.18874	6.92435	7.34539
5.14002	5.3926	3.20923	6.96553	7.44649
5.15002	5.40164	3.20775	6.91034	7.38491
5.16002	5.46421	3.21396	6.99777	7.35612
5.17002	5.40919	3.22041	6.928	7.34099
5.18002	5.39945	3.22273	6.94294	7.35318
5.19002	5.45801	3.23695	6.94146	7.27452
5.20003	5.46273	3.21224	6.89548	7.29541
5.21003	5.48236	3.20611	6.95346	7.29851
5.22003	5.42434	3.22144	6.99283	7.45715
5.23003	5.40877	3.21097	7.00516	7.36644
5.24003	5.41151	3.21528	6.98277	7.30796
5.25003	5.45058	3.16485	6.91385	7.39394
5.26003	5.46525	3.22034	6.95073	7.36243
5.27003	5.35352	3.19249	6.94587	7.38497
5.28003	5.39678	3.18113	6.96039	7.4408
5.29003	5.45325	3.2206	6.90842	7.36944
5.30003	5.45892	3.17733	6.91134	7.3273
5.31003	5.44503	3.1994	6.93762	7.40622
5.32003	5.44647	3.19767	6.94714	7.41102
5.33003	5.36242	3.20014	7.03136	7.39984
5.34003	5.44097	3.18837	7.04532	7.49529
5.35003	5.36546	3.19523	6.96086	7.38768
5.36003	5.467	3.23258	6.99562	7.37609
5.37003	5.48267	3.19923	7.08411	7.3459
5.38003	5.48244	3.21361	7.00447	7.40587
5.39003	5.45306	3.23232	6.99533	7.41518
5.40003	5.48402	3.19513	6.97464	7.41801
5.41003	5.4312	3.21822	7.04027	7.44188
5.42003	5.48896	3.22271	7.03868	7.43746
5.43003	5.40207	3.22591	7.06322	7.45861
5.44003	5.52593	3.204	6.99555	7.41848
5.45003	5.45769	3.22197	7.03691	7.43941
5.46003	5.46762	3.24183	6.95865	7.47997
5.47003	5.44618	3.23674	7.02813	7.40515
5.48003	5.40797	3.23247	7.04581	7.46521
5.49003	5.45392	3.24149	7.04112	7.47265
5.50003	5.47509	3.25831	7.01175	7.39908
5.51003	5.48951	3.23978	7.02406	7.45164
5.52003	5.49129	3.25045	6.99719	7.41676
[truncated: 5,048 more rows]

## Sheet: Panel C pH
	0 μg/ml DHNA		0.01 μg/ml DHNA
	rep1	rep2	rep1	rep2
0 h	6.44	6.44	6.44	6.44
56 h	6.44	6.46	6.24	6.25
