# Supplementary material for: Extracellular electron transfer increases fermentation in lactic acid bacteria via a hybrid metabolism
Source: eLife. 2022 Feb 11;11:e70684. doi: 10.7554/eLife.70684 (PMC8837199; doi:10.7554/eLife.70684)
Supplement: Figure 1—source data 1. [file elife-70684-fig1-data1.xlsx]

## Sheet: Panel A
Iron reduction by L. plantarum under different assay conditions.
Group	Live cells (-) Mannitol (+) DHNA (+)	Live cells (+) Mannitol (-) DHNA (+)	Live cells (+) Mannitol (+) DHNA (-)	Live cells (+) Mannitol (+) DHNA (+)
[Fe2+] (mM)	0	0.014604	0	0.031069
	0	0.01556	0	0.029085
	0	0.021514	0	0.031253

## Sheet: Panel C
Current produced by L. plantarum under different growth conditions.
Time	Curent density						Curent density				Curent density
days	mann and DHNA	mann and DHNA	mann and DHNA				no DHNA	no DHNA	no DHNA		no mannitol	no mannitol	no mannitol
0							-0.199971	-0.14825	0.019242		1.36347	5.45498	2.60462
0.000416667	0.58955	0.35717	0.5048				0.104681	0.0263288	0.0441073		1.31619	5.1889	2.4547
0.000833333	0.51782	0.3325	0.46038				0.119459	0.0524208	0.0657477		1.27687	4.96905	2.33484
0.00125	0.52723	0.33072	0.4439				0.130193	0.0645876	0.0780465		1.24362	4.79022	2.23596
0.00167	0.53373	0.3329	0.43224				0.135818	0.0730611	0.0824181		1.21502	4.64982	2.15234
0.00208	0.54058	0.33468	0.42948				0.135399	0.0767549	0.086044		1.19032	4.52805	2.08158
0.0025	0.53406	0.33418	0.43235				0.135488	0.0789173	0.0897315		1.09596	3.89133	1.73138
0.00292	0.53568	0.33486	0.43315				0.140886	0.0819465	0.0918281		1.04288	3.69483	1.59945
0.00333	0.53843	0.33318	0.43464				0.146283	0.0833694	0.0911185		1.0064	3.56118	1.50849
0.00375	0.53743	0.33269	0.43871				0.143806	0.0849008	0.0904383		0.9794	3.45602	1.44555
0.00417	0.53444	0.33455	0.43438				0.141207	0.0850505	0.0923321		0.958379	3.37843	1.39861
0.00458	0.53805	0.33356	0.43637				0.142537	0.0867073	0.0932201		0.941509	3.32232	1.36184
0.005	0.5431	0.33055	0.4335				0.143	0.0859453	0.094596		0.927684	3.28636	1.33251
0.00542	0.53916	0.33271	0.43378				0.149996	0.0863603	0.0935773		0.916091	3.25856	1.30738
0.00583	0.54057	0.33481	0.43683				0.151382	0.0861612	0.0937106		0.905957	3.22885	1.28593
0.00625	0.53609	0.33583	0.43689				0.15212	0.0863246	0.0935762		0.897674	3.16944	1.26712
0.00667	0.53501	0.33296	0.43675				0.150378	0.0854607	0.0926196		0.89028	3.13771	1.25014
0.00708	0.5417	0.33366	0.43798				0.147331	0.0883609	0.0932099		0.883586	3.13136	1.2355
0.0075	0.54436	0.33737	0.43825				0.150084	0.0881739	0.0950289		0.877451	3.09138	1.22284
0.00792	0.53778	0.33455	0.4374				0.14842	0.087662	0.0934437		0.871925	3.07372	1.21169
0.00833	0.53274	0.33827	0.43726				0.148674	0.0883431	0.0940213		0.867151	3.05362	1.20111
0.00875	0.52855	0.337	0.437				0.153786	0.0877282	0.0912993		0.863096	3.03509	1.1908
0.00917	0.52481	0.33417	0.44323				0.157272	0.0878453	0.093138		0.859199	3.02281	1.1817
0.00958	0.52644	0.33243	0.43359				0.154072	0.0884183	0.0931143		0.85582	3.01467	1.17309
0.01	0.5236	0.33362	0.43395				0.153772	0.086365	0.0936786		0.852566	2.99553	1.16503
0.01042	0.53076	0.33755	0.4373				0.149924	0.0885417	0.0940012		0.850048	2.97672	1.15751
0.01083	0.53343	0.33825	0.43613				0.14898	0.0871993	0.0910468		0.847417	2.9921	1.15068
0.01125	0.5259	0.33787	0.43581				0.152276	0.0869575	0.0944944		0.845051	2.98807	1.14402
0.01167	0.53098	0.3363	0.43661				0.160749	0.0870359	0.0922336		0.84263	2.93269	1.13818
0.01208	0.53249	0.33843	0.43713				0.153462	0.0870755	0.0939548		0.84076	2.88419	1.13238
0.0125	0.5297	0.33391	0.43954				0.155225	0.0873647	0.0922625		0.838954	2.82496	1.12705
0.01292	0.52496	0.33525	0.44165				0.152291	0.087272	0.0944053		0.837318	2.78171	1.12142
0.01333	0.52657	0.33443	0.43768				0.159234	0.0877357	0.0919192		0.835747	2.73656	1.11645
0.01375	0.52803	0.33343	0.44805				0.159011	0.0857962	0.0940082		0.834613	2.67001	1.11114
0.01417	0.53204	0.33535	0.43582				0.160702	0.0868948	0.0897556		0.833545	2.58898	1.10612
0.01458	0.525	0.33564	0.43693				0.156902	0.08739	0.0926345		0.832338	2.53291	1.10173
0.015	0.52488	0.33431	0.43859				0.162624	0.0876058	0.090811		0.831316	2.4879	1.09727
0.01542	0.51995	0.33278	0.43554				0.162156	0.0864863	0.0917134		0.829891	2.42651	1.09323
0.01583	0.51859	0.33495	0.4368				0.159802	0.0867101	0.0908123		0.828712	2.35834	1.0893
0.01625	0.52687	0.33433	0.44024				0.159172	0.0861445	0.090352		0.827728	2.29858	1.08507
0.01667	0.52953	0.33423	0.43552				0.152601	0.0868928	0.0909395		0.826496	2.25414	1.08096
0.01708	0.52656	0.3332	0.43745				0.14265	0.0861698	0.0913792		0.825632	2.21546	1.07712
0.0175	0.53529	0.33625	0.43624				0.138807	0.0861391	0.0919974		0.825033	2.17499	1.07332
0.01792	0.53047	0.33473	0.44119				0.140492	0.0851037	0.0894646		0.824399	2.13539	1.06968
0.01833	0.53382	0.33607	0.44226				0.14003	0.0857636	0.0902282		0.823515	2.10879	1.0667
0.01875	0.53668	0.33514	0.43606				0.145461	0.0850762	0.0910966		0.822337	2.08273	1.06379
0.01917	0.53405	0.3344	0.43587				0.136702	0.0863568	0.089293		0.821578	2.05959	1.06063
0.01958	0.52485	0.33374	0.43689				0.140002	0.0848084	0.0904995		0.820538	2.02982	1.05786
0.02	0.52238	0.33368	0.43755				0.13411	0.085243	0.0884997		0.820272	2.01523	1.05477
0.02042	0.52792	0.33712	0.43524				0.134709	0.0857083	0.0896678		0.819338	2.02736	1.05157
0.02083	0.52261	0.33367	0.43324				0.126999	0.0853301	0.0896783		0.818898	2.13619	1.04845
0.02125	0.52887	0.33058	0.43378				0.126979	0.0851836	0.0901535		0.818626	2.27311	1.04585
0.02167	0.52841	0.33351	0.43771				0.129013	0.0855635	0.088752		0.81757	2.42166	1.0437
0.02208	0.5311	0.33832	0.43592				0.12919	0.0841954	0.0896873		0.816439	2.56651	1.04162
0.0225	0.52663	0.3349	0.436				0.125698	0.0847767	0.0888337		0.81563	2.69713	1.03939
0.02292	0.53001	0.33561	0.43629				0.126522	0.08446	0.0890901		0.814637	2.83683	1.03677
0.02333	0.53011	0.33521	0.43616				0.131951	0.0822696	0.0887322		0.813951	2.99159	1.03387
0.02375	0.53103	0.3348	0.43313				0.126949	0.0840664	0.0875249		0.813353	3.13218	1.03067
0.02417	0.53314	0.33351	0.4368				0.123067	0.0843504	0.0876791		0.813062	3.27049	1.02733
0.02458	0.53746	0.33406	0.43481				0.12736	0.0842878	0.0870748		0.812624	3.40915	1.02488
0.025	0.53534	0.33438	0.43691				0.11944	0.0827578	0.0889685		0.812415	3.5312	1.02311
0.02542	0.53262	0.33528	0.43519				0.121439	0.0827331	0.0880008		0.811869	3.578	1.02074
0.02583	0.53714	0.3334	0.43815				0.125215	0.0831449	0.0864195		0.811437	3.59769	1.01818
0.02625	0.53922	0.33567	0.43572				0.121167	0.0822188	0.0874191		0.811573	3.60016	1.01544
0.02667	0.5271	0.33427	0.43675				0.115173	0.0824159	0.0881819		0.811269	3.60687	1.01314
0.02708	0.5267	0.3373	0.43936				0.116951	0.0823369	0.0894305		0.810707	3.65109	1.01089
0.0275	0.53429	0.33747	0.43824				0.11676	0.0815781	0.0881087		0.810839	3.69759	1.0087
0.02792	0.53549	0.3385	0.44009				0.108343	0.0825515	0.0885397		0.810672	3.71824	1.00683
0.02833	0.54453	0.33649	0.43673				0.106896	0.0821798	0.0866704		0.810757	3.74133	1.00493
0.02875	0.53886	0.33505	0.43426				0.10985	0.0824514	0.0860762		0.810515	3.77209	1.00303
0.02917	0.54059	0.33446	0.43483				0.110817	0.0819733	0.0870828		0.810303	3.79176	1.00078
0.02958	0.54466	0.33506	0.43625				0.121021	0.0817253	0.0866946		0.810413	3.83231	0.997998
0.03	0.54489	0.33606	0.43693				0.119391	0.0819718	0.0854995		0.810573	3.86541	0.995825
0.03042	0.55115	0.3355	0.43433				0.121531	0.0817832	0.0850827		0.810589	3.84555	0.993536
0.03083	0.55342	0.33667	0.4351				0.118763	0.0804381	0.086307		0.810652	3.7865	0.991073
0.03125	0.55272	0.33557	0.4332				0.115541	0.0829013	0.0858599		0.810887	3.69777	0.988327
0.03167	0.54573	0.33764	0.43409				0.117063	0.0806945	0.0848281		0.811393	3.5787	0.985628
0.03208	0.5386	0.33225	0.43374				0.115851	0.0809932	0.0858663		0.81152	3.44699	0.983092
0.0325	0.53783	0.33324	0.43309				0.116552	0.0812332	0.0871301		0.812327	3.32628	0.980801
0.03292	0.53974	0.33236	0.4345				0.114309	0.0811495	0.0859636		0.812788	3.19758	0.97859
0.03333	0.54241	0.33098	0.43594				0.114811	0.0810206	0.0858143		0.813201	3.05794	0.976423
0.03375	0.53796	0.33225	0.43545				0.119901	0.0810134	0.0868755		0.813615	2.92792	0.974462
0.03417	0.53749	0.33619	0.43435				0.11582	0.0804268	0.0839972		0.813986	2.76017	0.972462
0.03458	0.53517	0.3369	0.43488				0.11987	0.0804795	0.0839815		0.814489	2.58728	0.970354
0.035	0.53195	0.33735	0.44802				0.114024	0.0812078	0.0850536		0.814751	2.46169	0.968603
0.03542	0.53398	0.33819	0.44621				0.116703	0.0806491	0.0860863		0.815382	2.37039	0.967127
0.03583	0.53065	0.33978	0.42874				0.119208	0.080313	0.0849715		0.816078	2.30842	0.965753
0.03625	0.53204	0.33695	0.42524				0.117231	0.0809251	0.0881586		0.816347	2.25745	0.964233
0.03667	0.53188	0.33827	0.43069				0.122131	0.0815034	0.0857926		0.816568	2.20063	0.962997
0.03708	0.52361	0.33682	0.43222				0.119842	0.0796769	0.0869368		0.816247	2.15548	0.961426
0.0375	0.52736	0.33473	0.43325				0.118255	0.0795073	0.0850113		0.816384	2.11182	0.959998
0.03792	0.52054	0.33556	0.43333				0.124555	0.0801002	0.0848182		0.816897	2.06964	0.958493
0.03833	0.5199	0.33583	0.43284				0.131051	0.0798843	0.0841353		0.817555	2.0124	0.956572
0.03875	0.52302	0.33965	0.43234				0.13181	0.0795275	0.0842988		0.817947	1.96927	0.955037
0.03917	0.51609	0.33851	0.43302				0.135809	0.0794114	0.085495		0.818351	1.93116	0.953755
0.03958	0.51566	0.33649	0.4326				0.132638	0.0793533	0.0843847		0.819336	1.89537	0.952292
0.04	0.52276	0.3382	0.43014				0.13865	0.0790895	0.0847863		0.820179	1.87263	0.950504
0.04042	0.5175	0.33911	0.43264				0.134646	0.08045	0.0848283		0.820299	1.84464	0.948691
0.04083	0.52192	0.33877	0.43323				0.132582	0.0793249	0.0836013		0.820879	1.81717	0.947825
0.04125	0.5201	0.33641	0.43241				0.126777	0.0800609	0.0842174		0.82148	1.80333	0.946351
0.04167	0.52033	0.33592	0.43667				0.133432	0.0792005	0.0827447		0.822185	1.77312	0.945207
0.04208	0.51705	0.33769	0.43398				0.137618	0.0791258	0.0847569		0.822892	1.75399	0.94402
0.0425	0.51659	0.3381	0.43311				0.134019	0.0794474	0.0850509		0.823038	1.73634	0.942664
0.04292	0.52194	0.33687	0.43243				0.13188	0.078106	0.0829001		0.823327	1.73658	0.941789
0.04333	0.51879	0.3351	0.43695				0.131511	0.080218	0.0843103		0.823995	1.73369	0.940681
0.04375	0.5203	0.3359	0.43701				0.131929	0.0788421	0.0845654		0.824962	1.72858	0.939025
0.04417	0.52483	0.33463	0.43298				0.132587	0.0798851	0.0837983		0.825331	1.73314	0.937779
0.04458	0.52326	0.33478	0.43612				0.131388	0.0790149	0.083246		0.825749	1.72444	0.936763
0.045	0.52535	0.3377	0.43656				0.127706	0.0789163	0.0835822		0.826382	1.71819	0.935581
0.04542	0.52733	0.33821	0.43844				0.127077	0.078457	0.0837348		0.826749	1.71	0.933523
0.04583	0.52967	0.33742	0.43458				0.122307	0.07872	0.0841649		0.827325	1.69871	0.931999
0.04625	0.52678	0.33992	0.43412				0.117814	0.07901	0.083531		0.827511	1.68242	0.930178
0.04667	0.5196	0.34303	0.43454				0.12405	0.0794217	0.084846		0.827429	1.67396	0.928533
0.04708	0.51984	0.34068	0.43435				0.128375	0.0792846	0.0853671		0.827857	1.66435	0.92752
0.0475	0.52088	0.33807	0.43617				0.130239	0.0792341	0.0838944		0.828008	1.65151	0.926558
0.04792	0.52884	0.34266	0.43453				0.130437	0.0787466	0.0840425		0.827752	1.6473	0.925555
0.04833	0.52615	0.34052	0.43456				0.130413	0.0791215	0.0830561		0.82682	1.64856	0.925224
0.04875	0.52652	0.34162	0.43493				0.129167	0.078949	0.0828543		0.826755	1.6378	0.924478
0.04917	0.53101	0.34148	0.43387				0.131287	0.0783825	0.0835794		0.826219	1.63298	0.923427
0.04958	0.53556	0.34035	0.43508				0.132014	0.0783602	0.0822384		0.826216	1.63491	0.922881
0.05	0.53268	0.34183	0.43542				0.123747	0.0779768	0.0828897		0.826284	1.63236	0.922277
0.05042	0.52349	0.34197	0.43148				0.123121	0.0773272	0.0829311		0.826138	1.63692	0.921537
0.05083	0.53016	0.34461	0.43471				0.120241	0.0777675	0.0808902		0.826821	1.65618	0.920708
0.05125	0.53839	0.34431	0.43363				0.118226	0.0800839	0.0845707		0.826929	1.65898	0.920172
0.05167	0.53284	0.34459	0.4339				0.11685	0.0789045	0.0822985		0.8274	1.67712	0.919063
0.05208	0.53556	0.34162	0.42944				0.120752	0.0789762	0.0840452		0.827594	1.69271	0.91798
0.0525	0.54809	0.34209	0.43423				0.113101	0.0770533	0.0848526		0.827961	1.68605	0.916976
0.05292	0.5501	0.34139	0.43441				0.11483	0.0777998	0.0819317		0.828355	1.68078	0.915537
0.05333	0.54824	0.33917	0.43313				0.116249	0.0783429	0.0836387		0.828328	1.69317	0.914705
0.05375	0.53247	0.33661	0.43316				0.113328	0.0770108	0.0828569		0.828682	1.69495	0.913695
0.05417	0.53788	0.3386	0.42947				0.104611	0.0782141	0.0832608		0.829404	1.69007	0.9128
0.05458	0.53391	0.34043	0.43469				0.105703	0.078036	0.0811519		0.8298	1.69718	0.91189
0.055	0.5354	0.33943	0.43138				0.11058	0.0773415	0.0823019		0.830306	1.70912	0.910768
0.05542	0.53415	0.33826	0.4329				0.109537	0.0769798	0.0817124		0.830544	1.70444	0.910282
0.05583	0.52623	0.33786	0.42987				0.109322	0.0785012	0.0829311		0.831086	1.70669	0.909485
0.05625	0.52637	0.33885	0.43102				0.117602	0.0779826	0.0815176		0.831522	1.70942	0.908561
0.05667	0.53422	0.33776	0.42893				0.112419	0.076819	0.0820336		0.832303	1.70988	0.907455
0.05708	0.53828	0.34021	0.433				0.110511	0.0761873	0.0795168		0.833005	1.72921	0.906316
0.0575	0.53594	0.33802	0.43631				0.110015	0.0784521	0.0828069		0.83348	1.7457	0.905519
0.05792	0.53784	0.33355	0.44383				0.111838	0.0774605	0.0821326		0.834011	1.75231	0.90425
0.05833	0.54453	0.33601	0.44224				0.108053	0.0774827	0.0805412		0.83524	1.76104	0.903259
0.05875	0.54289	0.33765	0.44354				0.0976467	0.0766003	0.0805681		0.835744	1.77207	0.902059
0.05917	0.54314	0.33671	0.44253				0.0988733	0.0776974	0.0811674		0.836342	1.77781	0.900793
0.05958	0.54262	0.33551	0.43903				0.0996655	0.0769644	0.0817627		0.836908	1.77742	0.899679
0.06	0.53763	0.33611	0.43371				0.100633	0.0776155	0.0793967		0.838041	1.78367	0.898402
0.06042	0.54144	0.33715	0.43325				0.102661	0.0756445	0.0830838		0.83938	1.78096	0.897325
0.06083	0.53846	0.33474	0.43394				0.106004	0.076823	0.0815329		0.839613	1.77172	0.896732
0.06125	0.53785	0.33547	0.43408				0.102004	0.0751919	0.0793318		0.839597	1.75644	0.896491
0.06167	0.53313	0.3346	0.42723				0.104979	0.0769153	0.0806931		0.840228	1.75393	0.896041
0.06208	0.53192	0.3384	0.42618				0.105058	0.0767089	0.082356		0.841078	1.74646	0.894943
0.0625	0.52908	0.33515	0.42576				0.106425	0.0768379	0.0817624		0.841907	1.74077	0.894058
0.06292	0.52909	0.33783	0.43172				0.105548	0.0760735	0.0821537		0.841961	1.7357	0.893092
0.06333	0.52839	0.33582	0.43164				0.105097	0.077362	-0.0881253		0.842805	1.72785	0.892541
0.06375	0.53513	0.33535	0.4382				0.115221	0.0783203	0.0884606		0.843649	1.71854	0.891812
0.06417	0.53429	0.33404	0.42775				0.151252	0.141911	0.0864859		0.844907	1.70969	0.891272
0.06458	0.53628	0.33037	0.42977				0.12561	0.113183	0.0832997		0.845254	1.70567	0.890534
0.065	0.533	0.33451	0.43401				0.119611	0.117002	0.0717823		0.845914	1.69189	0.890094
0.06542	0.53606	0.33442	0.43081				0.134097	0.110635	0.0765339		0.846904	1.68289	0.88903
0.06583	0.53492	0.33266	0.4266				0.140171	0.113805	0.0809986		0.848241	1.67575	0.887687
0.06625	0.53125	0.33479	0.42734				0.150014	0.125684	0.085699		0.849274	1.64464	0.886674
0.06667	0.53133	0.33309	0.42679				0.155702	0.201804	0.0895628		0.850895	1.62481	0.886349
0.06708	0.52979	0.3331	0.42945				0.165556	0.139521	0.0967508		0.851913	1.61969	0.886186
0.0675	0.52674	0.33361	0.42496				0.171774	0.139287	0.134187		0.853061	1.61732	0.886015
0.06792	0.5335	0.33514	0.42329				0.176596	0.139425	0.132409		0.853853	1.61966	0.885165
0.06833	0.5325	0.3342	0.42541				0.18603	0.142499	0.137843		0.854477	1.62288	0.884728
0.06875	0.52973	0.33379	0.4241				0.18771	0.146765	0.140577		0.854973	1.61654	0.884351
0.06917	0.52446	0.33392	0.42415				0.19749	0.149994	0.144408		0.855609	1.61225	0.884125
0.06958	0.52825	0.33617	0.42157				0.205843	0.152274	0.15251		0.856041	1.62921	0.883631
0.07	0.5283	0.33409	0.42311				0.209328	0.158395	0.157413		0.856693	1.62855	0.883578
0.07042	0.52373	0.33767	0.43349				0.209035	0.162056	0.163861		0.856982	1.62765	0.883393
0.07083	0.51531	0.33382	0.43714				0.218961	0.166031	0.171429		0.857466	1.63784	0.882964
0.07125	0.51278	0.33354	0.43238				0.224605	0.172947	0.177909		0.856863	1.64282	0.882552
0.07167	0.51918	0.33601	0.42498				0.239139	0.17905	0.185798		0.856828	1.63705	0.881505
0.07208	0.5386	0.33803	0.42183				0.250823	0.18354	0.196321		0.856629	1.63891	0.880753
0.0725	0.54046	0.33529	0.42268				0.256334	0.190877	0.206171		0.856307	1.64422	0.88046
0.07292	0.54404	0.33491	0.42381				0.263935	0.196548	0.215185		0.856243	1.64239	0.879858
0.07333	0.54273	0.33367	0.42529				0.277372	0.20397	0.226982		0.855997	1.64045	0.879346
0.07375	0.53903	0.3349	0.42009				0.283855	0.212556	0.234249		0.855728	1.63894	0.878708
0.07417	1.09736	1.16548	0.54568				0.295292	0.219717	0.244577		0.854784	1.64548	0.878119
0.07458	1.51371	0.88672	1.21943				0.30689	0.226866	0.261247		0.854899	1.66125	0.877762
0.075	1.50952	0.83125	1.02626				0.318581	0.23755	0.267974		0.854758	1.6832	0.876804
0.07542	1.62142	0.94089	0.98191				0.323833	0.24517	0.282292		0.854404	1.70419	0.875919
0.07583	1.54298	1.04601	0.94403				0.333723	0.252601	0.294182		0.855031	1.71594	0.874818
0.07625	1.54963	1.09786	0.99336				0.35087	0.259772	0.308113		0.855183	1.71768	0.874533
0.07667	1.60914	1.19335	1.0943				0.357239	0.26935	0.320551		0.855439	1.71184	0.874028
0.07708	1.66638	1.29589	1.1976				0.364073	0.281166	0.333968		0.855749	1.71523	0.873567
0.0775	1.72984	1.38245	1.30733				0.377581	0.294098	0.35088		0.856329	1.72585	0.873517
0.07792	1.79143	1.47559	1.42493				0.38789	0.306476	0.369313		0.856241	1.74574	0.873231
0.07833	1.85178	1.57059	1.54236				0.396649	0.321077	0.388093		0.856339	1.76097	0.872835
0.07875	1.92558	1.69034	1.65551				0.424196	0.335835	0.410246		0.857017	1.75885	0.872381
0.07917	1.99937	1.78893	1.77621				0.434779	0.34787	0.420027		0.856976	1.75311	0.872017
0.07958	2.07962	1.87282	1.88915				0.453462	0.357456	0.441727		0.857551	1.75624	0.87198
0.08	2.14556	1.98191	1.99048				0.465249	0.373702	0.46517		0.857855	1.75468	0.872385
0.08042	2.22995	2.08204	2.10799				0.481784	0.387684	0.488867		0.857993	1.75462	0.87248
0.08083	2.28986	2.18127	2.21406				0.498529	0.404919	0.512043		0.858082	1.75909	0.871886
0.08125	2.37356	2.27492	2.32273				0.515535	0.41523	0.541421		0.857802	1.77274	0.871936
0.08167	2.44775	2.36478	2.40495				0.527769	0.432546	0.556146		0.857125	1.76022	0.871583
0.08208	2.52333	2.47535	2.5239				0.554114	0.442373	0.592239		0.856857	1.75542	0.871112
0.0825	2.59764	2.57413	2.6269				0.569085	0.446504	0.607646		0.857628	1.7443	0.87071
0.08292	2.67614	2.63739	2.74213				0.592039	0.473458	0.632073		0.858284	1.74177	0.870284
0.08333	2.73164	2.7081	2.82124				0.607899	0.486114	0.663		0.85919	1.73699	0.869442
0.08375	2.80624	2.8067	2.90497				0.632255	0.506094	0.693019		0.859738	1.72846	0.868565
0.08417	2.8945	2.90068	3.00981				0.66378	0.522608	0.710498		0.859882	1.71833	0.868014
0.08458	2.98569	3.03514	3.09174				0.681383	0.532858	0.727608		0.860109	1.69821	0.867039
0.085	3.0402	3.0413	3.19126				0.697509	0.546308	0.758476		0.860499	1.67845	0.866601
0.08542	3.11239	3.1676	3.28437				0.726387	0.56469	0.787044		0.860875	1.65601	0.86657
0.08583	3.19071	3.2652	3.36344				0.752264	0.582275	0.829364		0.861177	1.64773	0.865648
0.08625	3.23434	3.28408	3.47204				0.779999	0.583573	0.846806		0.861957	1.65595	0.864804
0.08667	3.31438	3.39892	3.58472				0.809081	0.603027	0.873378		0.862403	1.64594	0.864316
0.08708	3.40903	3.49697	3.67941				0.824041	0.615527	0.911019		0.862353	1.6105	0.863697
0.0875	3.50626	3.5843	3.77231				0.843156	0.636263	0.928236		0.863016	1.58935	0.863717
0.08792	3.56141	3.64219	3.8756				0.859423	0.648853	0.960808		0.863551	1.59295	0.863938
0.08833	3.63669	3.75965	3.97696				0.884378	0.668321	0.988698		0.863951	1.61182	0.863851
0.08875	3.7034	3.80705	4.0507				0.914024	0.680585	0.996099		0.864519	1.61875	0.86397
0.08917	3.75929	3.92246	4.13618				0.940798	0.704769	1.03988		0.865285	1.62928	0.863847
0.08958	3.83268	4.01424	4.25109				0.958233	0.717698	1.05397		0.865627	1.64658	0.863531
0.09	3.91845	4.08805	4.34987				1.00431	0.731281	1.0989		0.866539	1.66852	0.863376
0.09042	3.98546	4.23502	4.459				0.988337	0.732149	1.10756		0.867352	1.67854	0.863437
0.09083	4.06734	4.33434	4.55453				1.03244	0.74534	1.15671		0.86844	1.68503	0.863934
0.09125	4.16702	4.36718	4.63917				1.04885	0.74557	1.16345		0.86942	1.69705	0.863815
0.09167	4.23358	4.48241	4.74542				1.05991	0.752665	1.18678		0.870491	1.73472	0.863805
0.09208	4.32415	4.57124	4.84422				1.09707	0.797152	1.19989		0.871001	1.75394	0.863229
0.0925	4.41256	4.74139	4.9632				1.12923	0.812992	1.22683		0.871625	1.75872	0.863529
0.09292	4.48467	4.81356	5.02055				1.14096	0.81481	1.23228		0.872266	1.75529	0.863531
0.09333	4.55407	4.89253	5.1229				1.16109	0.832107	1.31351		0.87261	1.74807	0.863289
0.09375	4.63598	4.96317	5.22942				1.2107	0.853042	1.30146		0.873068	1.75713	0.863439
0.09417	4.71299	5.09275	5.32502				1.22076	0.877923	1.3609		0.873651	1.77042	0.863512
0.09458	4.80906	5.21454	5.43489				1.25552	0.883743	1.39017		0.874316	1.77569	0.863607
0.095	4.8964	5.30201	5.54459				1.26157	0.884865	1.40179		0.875836	1.77327	0.863744
0.09542	4.96947	5.44135	5.65958				1.29627	0.902482	1.4334		0.877528	1.76456	0.863676
0.09583	5.03355	5.54015	5.75163				1.2954	0.918452	1.45102		0.878297	1.76025	0.863859
0.09625	5.15677	5.7371	5.86728				1.31111	0.931864	1.45876		0.878944	1.76618	0.863954
0.09667	5.20595	5.7335	5.98333				1.33998	0.913443	1.49529		0.879843	1.77529	0.864091
0.09708	5.31152	5.81896	6.12934				1.38577	0.947343	1.53038		0.880121	1.7721	0.863917
0.0975	5.43915	5.88661	6.22566				1.39422	0.981517	1.52698		0.880658	1.76949	0.863964
0.09792	5.4875	6.02901	6.27769				1.40874	0.999595	1.60197		0.881525	1.77728	0.86387
0.09833	5.57684	6.11267	6.43304				1.42773	0.996755	1.59698		0.882615	1.77288	0.863916
0.09875	5.70836	6.20863	6.54729				1.45488	1.01897	1.57288		0.883672	1.75044	0.863974
0.09917	5.79689	6.38287	6.63458				1.48281	1.03145	1.60372		0.884673	1.71695	0.86411
0.09958	5.82988	6.48682	6.7815				1.50705	1.0443	1.65544		0.885129	1.69489	0.864304
0.1	5.92919	6.61004	6.90206				1.50587	1.04803	1.67492		0.884878	1.68745	0.864822
0.10042	6.0337	6.68289	7.04528				1.56325	1.06413	1.68511		0.884948	1.68784	0.864791
0.10083	6.12703	6.79902	7.13802				1.58786	1.07744	1.71748		0.885375	1.68322	0.865149
0.10125	6.20157	6.86876	7.23867				1.57286	1.04972	1.71859		0.885339	1.66965	0.865386
0.10167	6.33877	7.05188	7.33774				1.5978	1.0858	1.75848		0.885929	1.66938	0.865332
0.10208	6.41468	7.0797	7.47424				1.62273	1.10351	1.77909		0.885947	1.66536	0.865763
0.1025	6.50124	7.2398	7.60571				1.63075	1.13502	1.82257		0.885895	1.65736	0.86634
0.10292	6.57683	7.36963	7.71274				1.6282	1.13711	1.85223		0.885405	1.65776	0.866496
0.10333	6.67502	7.46399	7.85692				1.69106	1.16184	1.87246		0.885539	1.67338	0.866757
0.10375	6.72715	7.57387	7.94008				1.6989	1.16424	1.92016		0.885129	1.71098	0.867001
0.10417	6.876	7.66604	8.08694				1.71103	1.1784	1.91198		0.885089	1.71975	0.867366
0.10458	6.95625	7.74037	8.20813				1.7154	1.1706	1.9472		0.885505	1.70971	0.867039
0.105	7.0203	7.93954	8.27162				1.73251	1.18889	1.9295		0.886361	1.69077	0.867597
0.10542	7.12077	8.06556	8.40375				1.72852	1.18095	1.9088		0.887003	1.67258	0.867814
0.10583	7.27935	8.18124	8.54576				1.76774	1.23758	1.95431		0.887244	1.66631	0.868139
0.10625	7.39603	8.2337	8.64802				1.77316	1.24017	2.01234		0.887754	1.65282	0.868254
0.10667	7.41382	8.28499	8.78642				1.79365	1.24699	2.03288		0.888895	1.64302	0.868197
0.10708	7.51474	8.5217	8.86167				1.80466	1.2508	2.07551		0.889685	1.64734	0.868065
0.1075	7.67419	8.64978	9.00154				1.8228	1.24824	2.06555		0.890388	1.65183	0.8682
0.10792	7.76448	8.74937	9.11947				1.84918	1.22456	2.07437		0.890543	1.64015	0.868299
0.10833	7.83476	8.90428	9.28471				1.8663	1.29117	2.04923		0.891809	1.62646	0.868055
0.10875	7.93137	8.99929	9.40073				1.88604	1.28211	2.09544		0.891716	1.64135	0.867783
0.10917	8.03716	9.01875	9.51359				1.90205	1.31802	2.13234		0.891301	1.64707	0.867787
0.10958	8.05564	9.10404	9.66446				1.88984	1.32177	2.20046		0.891197	1.63668	0.867062
0.11	8.23412	9.24948	9.72785				1.89842	1.32021	2.11324		0.891117	1.6366	0.8663
0.11042	8.40231	9.45482	9.85546				1.94224	1.33592	2.18732		0.891402	1.61071	0.866178
0.11083	8.44549	9.58732	9.98298				1.93973	1.3583	2.16545		0.89136	1.57778	0.86623
0.11125	8.51524	9.77202	10.1173				1.95391	1.38192	2.20512		0.891715	1.54736	0.866125
0.11167	8.61456	9.79859	10.2452				1.96691	1.37953	2.22024		0.892006	1.49751	0.866056
0.11208	8.68236	9.96269	10.3602				2.00178	1.38511	2.26427		0.892599	1.4366	0.866015
0.1125	8.77677	10.0543	10.472				1.99453	1.39293	2.23721		0.892949	1.3891	0.86579
0.11292	8.98248	10.0585	10.6122				2.00508	1.40617	2.27735		0.892372	1.33541	0.865674
0.11333	9.06575	10.1062	10.7388				2.0317	1.4142	2.23357		0.893355	1.27153	0.865576
0.11375	9.17668	10.357	10.8213				2.05092	1.41167	2.29872		0.894116	1.22298	0.865595
0.11417	9.28864	10.4087	11.0054				2.07163	1.42145	2.31095		0.894468	1.18984	0.865937
0.11458	9.36087	10.5555	11.0955				2.06741	1.46483	2.35472		0.894973	1.14098	0.866404
0.115	9.43384	10.5857	11.1726				2.06987	1.47457	2.34056		0.895321	1.10871	0.866194
0.11542	9.59416	10.8618	11.3086				2.11495	1.48926	2.32756		0.895685	1.08707	0.866362
0.11583	9.67368	11.0477	11.3861				2.12919	1.48139	2.40471		0.895231	1.07215	0.866445
0.11625	9.86559	11.1527	11.5683				2.1116	1.46456	2.39823		0.895831	1.06749	0.866397
0.11667	9.83824	11.1804	11.7371				2.15727	1.47817	2.43977		0.895473	1.0699	0.865978
0.11708	9.9733	11.3884	11.8011				2.16406	1.51094	2.42643		0.894764	1.08042	0.866005
0.1175	10.153	11.6343	11.9304				2.16494	1.53833	2.41038		0.895061	1.09082	0.865765
0.11792	10.2319	11.6957	12.0785				2.20347	1.53239	2.43211		0.894397	1.1184	0.865269
0.11833	10.3983	11.6869	12.2046				2.21268	1.52669	2.41796		0.894693	1.12739	0.864467
0.11875	10.4051	11.7286	12.4145				2.23002	1.53496	2.44296		0.895292	1.13878	0.86462
0.11917	10.5566	11.9051	12.5157				2.20052	1.56553	2.42486		0.895358	1.1478	0.864473
0.11958	10.6118	12.0264	12.6638				2.22558	1.5654	2.49827		0.895467	1.16169	0.864414
0.12	10.7314	12.0171	12.7001				2.25019	1.60335	2.5168		0.895784	1.17502	0.864082
0.12042	10.804	12.4132	12.8844				2.24191	1.57225	2.49687		0.895927	1.18501	0.864399
0.12083	10.9317	12.5264	13.0515				2.31011	1.53347	2.6054		0.895214	1.21423	0.864656
0.12125	11.01	12.8251	13.1704				2.32227	1.57667	2.62132		0.896089	1.26008	0.865072
0.12167	11.1431	12.793	13.2476				2.28237	1.57554	2.59316		0.897635	1.30724	0.865356
0.12208	11.2811	12.9246	13.4115				2.2984	1.62313	2.55468		0.897798	1.36126	0.86551
0.1225	11.4938	13.113	13.5469				2.31525	1.65101	2.63907		0.898292	1.39483	0.865537
0.12292	11.4581	13.1663	13.7363				2.34208	1.65043	2.59998		0.898167	1.45653	0.86603
0.12333	11.5248	13.4109	13.8099				2.39447	1.67601	2.63953		0.897917	1.51838	0.865964
0.12375	11.7354	13.5982	13.9915				2.43511	1.68501	2.659		0.897789	1.57019	0.866228
0.12417	11.7381	13.8026	14.1517				2.40761	1.68972	2.67709		0.898022	1.62513	0.866642
0.12458	11.9376	13.9603	14.3028				2.44512	1.69405	2.65928		0.897741	1.67521	0.866501
0.125	12.031	14.0812	14.4502				2.43406	1.68492	2.69284		0.898514	1.72905	0.866257
0.12542	12.1541	14.2872	14.7132				2.46028	1.68526	2.69372		0.899162	1.75655	0.866272
0.12583	12.3133	14.2627	14.8387				2.49363	1.6975	2.7278		0.898781	1.76805	0.866425
0.12625	12.399	14.5856	14.9197				2.49416	1.73269	2.7161		0.898724	1.76813	0.866426
0.12667	12.3551	14.5996	15.0705				2.54118	1.74037	2.73457		0.899247	1.75213	0.866361
0.12708	12.4367	14.7625	15.2072				2.49708	1.72852	2.74228		0.899826	1.71586	0.866854
0.1275	12.6246	14.8579	15.3679				2.51249	1.72579	2.75503		0.900106	1.67972	0.867536
0.12792	12.758	15.0822	15.6371				2.5145	1.73964	2.76337		0.900648	1.64685	0.867682
0.12833	12.8264	15.265	15.7596				2.56425	1.77094	2.76004		0.901044	1.62609	0.867761
0.12875	12.9627	15.6034	15.9682				2.55412	1.77358	2.8273		0.901334	1.62216	0.867912
0.12917	13.1775	15.7485	16.1176				2.59754	1.77037	2.81463		0.901568	1.62478	0.868369
0.12958	13.1887	15.9435	16.2431				2.64001	1.80404	2.86528		0.901374	1.62872	0.868512
0.13	13.4652	16.0884	16.4361				2.61796	1.81747	2.85379		0.901327	1.63036	0.868324
0.13042	13.3743	16.1411	16.5569				2.6003	1.8248	2.79618		0.902028	1.62057	0.868345
0.13083	13.4472	16.1032	16.7848				2.61927	1.86182	2.86912		0.902498	1.61816	0.868644
0.13125	13.5592	16.2016	16.9267				2.63943	1.84269	2.83329		0.902961	1.63619	0.869229
0.13167	13.694	16.396	17.105				2.62834	1.83479	2.86648		0.90346	1.67813	0.86917
0.13208	13.937	16.6483	17.4582				2.66015	1.86688	2.89007		0.904212	1.70827	0.868363
0.1325	14.0411	16.6853	17.6135				2.69419	1.85979	2.8933		0.90428	1.73936	0.868051
0.13292	13.9962	16.9102	17.7477				2.67673	1.87437	2.89727		0.905284	1.78107	0.868161
0.13333	14.2137	17.1205	17.8593				2.63393	1.88873	2.85795		0.906141	1.78992	0.867722
0.13375	14.4395	16.9794	17.9794				2.67734	1.884	2.92971		0.908044	1.78983	0.867568
0.13417	14.5002	17.4226	18.1335				2.68789	1.90034	2.88856		0.909307	1.79066	0.867705
0.13458	14.6043	17.4731	18.2249				2.65337	1.90903	2.95442		0.910563	1.80174	0.867874
0.135	14.7567	17.394	18.4644				2.68999	1.93826	2.93393		0.911446	1.82738	0.868086
0.13542	15.2042	17.4491	18.5598				2.7199	1.95815	2.9801		0.911765	1.84702	0.868125
0.13583	15.2785	17.7098	18.7244				2.69252	1.98032	3.02892		0.912003	1.86021	0.868516
0.13625	15.2664	17.9246	18.8262				2.72491	1.9721	3.00549		0.912536	1.87318	0.869074
0.13667	15.4942	17.9705	19.0766				2.74788	1.93401	3.01885		0.913015	1.87393	0.869686
0.13708	15.6282	18.0839	19.1654				2.74411	1.94414	2.98739		0.913988	1.88049	0.870178
0.1375	15.7034	18.3167	19.261				2.7734	1.94616	2.97047		0.914992	1.86913	0.870152
0.13792	15.8432	18.5421	19.4434				2.78723	1.95691	3.086		0.91539	1.87479	0.871101
0.13833	16.0551	18.7549	19.452				2.76955	1.96127	3.05397		0.915233	1.87905	0.871368
0.13875	16.0149	18.7091	19.7108				2.7799	1.98579	3.08448		0.91578	1.86911	0.871561
0.13917	16.3131	18.7117	19.9157				2.77422	2.01629	3.05941		0.916758	1.85692	0.872296
0.13958	16.4116	18.9517	20.0347				2.7581	1.98927	3.06474		0.917665	1.84434	0.872789
0.14	16.7321	18.8362	19.883				2.80083	2.03049	3.045		0.918932	1.84378	0.872981
0.14042	16.7233	19.4442	20.081				2.81718	2.02518	3.07339		0.92068	1.83877	0.872651
0.14083	16.7606	19.393	20.2848				2.82641	2.04663	3.10698		0.922833	1.83087	0.872999
0.14125	16.9298	19.4006	20.4688				2.84148	2.02912	3.05721		0.92541	1.8433	0.873654
0.14167	16.9913	19.6806	20.5581				2.88763	2.04007	3.10341		0.926965	1.83159	0.874414
0.14208	17.1449	20.0554	20.6429				2.86413	2.05313	3.08412		0.92772	1.83467	0.875572
0.1425	17.2753	19.9144	20.7722				2.85212	2.0712	3.11085		0.929277	1.82605	0.875639
0.14292	17.4234	20.0492	20.9965				2.8676	2.07596	3.1688		0.930601	1.82885	0.876436
0.14333	17.5533	19.9782	20.9307				2.8655	2.10498	3.14171		0.932534	1.84773	0.877057
0.14375	17.9322	20.233	21.0905				2.85006	2.10701	3.1065		0.933384	1.85222	0.877756
0.14417	17.9521	20.2972	21.163				2.8901	2.14088	3.14377		0.93392	1.85689	0.877997
0.14458	18.0774	20.2667	21.3333				2.87919	2.11826	3.18742		0.934188	1.85638	0.878739
0.145	18.1428	20.5827	21.4857				2.89776	2.10493	3.13627		0.934596	1.85292	0.879886
0.14542	18.1931	20.6938	21.524				2.93446	2.05377	3.13018		0.934884	1.85346	0.880496
0.14583	18.2562	21.17	21.7551				2.93072	2.058	3.13846		0.934434	1.83438	0.880849
0.14625	18.3373	21.1655	21.9912				2.94579	2.12908	3.22555		0.934862	1.8338	0.881306
0.14667	18.2377	20.9749	21.8529				2.92702	2.12647	3.19875		0.936032	1.83907	0.881401
0.14708	18.5496	20.8407	22.0632				2.9772	2.15147	3.2416		0.937288	1.84719	0.881964
0.1475	18.7963	21.1645	22.2367				2.95833	2.14723	3.25845		0.938648	1.84938	0.882234
0.14792	18.8345	21.6806	22.3666				3.00252	2.14241	3.23933		0.939252	1.83538	0.88259
0.14833	18.8152	21.5838	22.5246				3.00719	2.16796	3.21723		0.940481	1.83195	0.8829
0.14875	19.1569	21.9218	22.3766				3.02204	2.16532	3.26168		0.941996	1.81592	0.883619
0.14917	19.0048	21.6876	22.4557				3.02234	2.1794	3.24875		0.943908	1.80674	0.883941
0.14958	19.0521	21.6617	22.758				3.02636	2.18777	3.28395		0.945329	1.79006	0.883994
0.15	19.5419	21.7501	22.9293				3.04529	2.20177	3.38335		0.945547	1.75179	0.884411
0.15042	19.5925	21.9457	23.1527				3.06301	2.21503	3.1952		0.946161	1.72172	0.885225
0.15083	19.7634	22.8713	23.168				3.04782	2.18144	3.31483		0.947101	1.67649	0.885629
0.15125	19.9043	22.5553	23.0642				3.04925	2.18478	3.2779		0.947646	1.62258	0.886403
0.15167	19.8772	22.4546	23.3203				3.08302	2.2005	3.29765		0.947873	1.58055	0.886982
0.15208	20.165	22.7271	23.4136				3.11927	2.22558	3.32823		0.947906	1.55572	0.887447
0.1525	20.1492	22.923	23.4257				3.08794	2.24266	3.35408		0.947584	1.50974	0.888295
0.15292	20.0385	22.8381	23.5238				3.11944	2.28003	3.33043		0.947442	1.46953	0.888671
0.15333	20.3299	22.8678	23.5991				3.12264	2.27039	3.35542		0.947521	1.4625	0.889162
0.15375	20.2636	23.1417	24.0185				3.17665	2.25467	3.33722		0.947711	1.45522	0.889682
0.15417	20.4833	23.1981	23.8497				3.15077	2.26235	3.36965		0.947524	1.46414	0.890429
0.15458	20.4676	22.961	23.9054				3.15495	2.26187	3.28264		0.948563	1.4751	0.890728
0.155	20.5018	23.0981	23.8877				3.13516	2.29863	3.39719		0.948722	1.48729	0.891141
0.15542	20.7754	23.4161	24.1668				3.14352	2.29329	3.33935		0.948013	1.48629	0.891556
0.15583	20.7462	23.788	24.3054				3.20745	2.30263	3.42335		0.948005	1.47545	0.891685
0.15625	20.6809	23.856	24.1083				3.16677	2.35012	3.41195		0.947904	1.45111	0.892195
0.15667	21.0093	23.9182	24.5717				3.14435	2.34523	3.35023		0.947018	1.41066	0.892687
0.15708	21.0282	23.9973	24.571				3.16614	2.36373	3.35305		0.947013	1.39153	0.892936
0.1575	21.0109	23.9961	24.2852				3.17084	2.31256	3.4198		0.947169	1.36856	0.893144
0.15792	21.1585	23.9271	24.2612				3.23731	2.34248	3.34949		0.947256	1.31895	0.892887
0.15833	21.1945	23.7924	24.4757				3.22835	2.34201	3.43796		0.946726	1.25538	0.893082
0.15875	21.3571	24.6641	24.4866				3.27743	2.32844	3.45413		0.946683	1.19053	0.893038
0.15917	21.4543	24.4111	24.7153				3.25354	2.341	3.48257		0.946228	1.14392	0.893226
0.15958	21.8039	24.352	24.6391				3.21568	2.37551	3.5175		0.947132	1.10143	0.893387
0.16	21.8671	24.3269	24.8008				3.27009	2.39369	3.42091		0.947657	1.08338	0.89316
0.16042	22.1146	24.5672	25.11				3.29254	2.38725	3.43746		0.947347	1.07163	0.89316
0.16083	21.8719	24.984	25.009				3.27102	2.41814	3.49165		0.947039	1.06195	0.892504
0.16125	22.1539	25.1794	24.9441				3.2672	2.45246	3.50743		0.947345	1.05365	0.892448
0.16167	22.3312	25.2115	25.0985				3.30168	2.42967	3.46072		0.94783	1.04885	0.892293
0.16208	22.686	25.0517	25.2711				3.28849	2.42212	3.49556		0.947954	1.04357	0.892139
0.1625	22.7741	25.1077	25.408				3.26596	2.44557	3.40614		0.947847	1.04057	0.892688
0.16292	22.6658	25.2159	25.4526				3.32579	2.44624	3.4705		0.948144	1.04226	0.89256
0.16333	22.8445	24.9219	25.7814				3.33445	2.4214	3.52197		0.948831	1.04735	0.892689
0.16375	22.8757	25.5076	25.6004				3.28903	2.45133	3.48735		0.949107	1.05628	0.89251
0.16417	22.7395	25.581	25.8193				3.32815	2.4834	3.5237		0.948853	1.08307	0.892091
0.16458	22.7895	25.7846	25.9384				3.30862	2.45423	3.57086		0.948939	1.14136	0.891833
0.165	22.9654	25.5877	25.816				3.31139	2.50123	3.48702		0.948935	1.20934	0.891397
0.16542	23.0229	26.1411	26.1257				3.32932	2.49143	3.52325		0.949181	1.26489	0.891232
0.16583	23.3803	25.8618	26.0923				3.30146	2.4877	3.47375		0.94952	1.32784	0.890908
0.16625	23.1917	25.9946	26.1326				3.29201	2.5035	3.6261		0.949332	1.38568	0.890102
0.16667	23.3935	26.156	26.3679				3.32905	2.51737	3.62868		0.949122	1.42457	0.889972
0.16708	23.2277	26.4385	26.5541				3.2972	2.48908	3.60626		0.949039	1.44475	0.889448
0.1675	23.6929	26.2836	26.2208				3.31408	2.52603	3.55216		0.949081	1.46825	0.88916
0.16792							3.3033	2.50465	3.5022		0.948187	1.47975	0.888648
0.16833							3.3414	2.54385	3.55815		0.947907	1.48192	0.888546
0.16875							3.38606	2.52595	3.61275		0.948223	1.46979	0.888492
0.16917							3.39261	2.50371	3.60619		0.949101	1.41874	0.88892
0.16958	23.7031	27.995	27.7611				3.36754	2.53408	3.51235		0.949672	1.35514	0.889075
0.17	23.7618	28.3957	27.6505				3.38575	2.51952	3.58324		0.950414	1.30274	0.889493
0.17042	23.3001	28.2486	27.8553				3.42436	2.54141	3.6201		0.950734	1.24338	0.889888
0.17083	23.0636	28.0176	28.0025				3.39235	2.54734	3.58678		0.951374	1.19614	0.890406
0.17125	23.7929	27.9537	28.0855				3.40873	2.55735	3.57219		0.952369	1.1666	0.890318
0.17167	24.0249	28.1587	27.9313				3.41484	2.57369	3.56222		0.953039	1.15013	0.890608
0.17208	23.9825	28.1813	27.979				3.37937	2.56052	3.58312		0.953475	1.1236	0.890787
0.1725	24.0405	28.3935	27.8834				3.48741	2.58351	3.59159		0.954478	1.10246	0.891017
0.17292	24.2198	28.2932	27.9043				3.44647	2.57628	3.57504		0.955121	1.09553	0.891257
0.17333	24.3573	28.576	28.0634				3.46037	2.56634	3.58821		0.954619	1.11313	0.891492
0.17375	24.3754	28.6495	28.048				3.48153	2.54507	3.58295		0.954363	1.12504	0.891538
0.17417	24.3523	28.3794	28.2585				3.4609	2.58097	3.55481		0.954374	1.14252	0.891883
0.17458	24.3555	28.6234	28.0862				3.4587	2.60251	3.66787		0.954549	1.1546	0.892134
0.175	24.4983	28.9699	28.3435				3.48096	2.61615	3.65385		0.955245	1.15836	0.892286
0.17542	24.6685	28.8014	28.4371				3.49075	2.64285	3.64299		0.955507	1.15139	0.892228
0.17583	24.813	28.696	28.5289				3.50093	2.62415	3.65214		0.955674	1.14649	0.892685
0.17625	24.8179	28.2975	28.471				3.48758	2.62572	3.64605		0.956414	1.14907	0.893068
0.17667	24.773	28.5754	28.6564				3.5285	2.62301	3.6422		0.956682	1.15699	0.893256
0.17708	24.9781	28.8506	28.5367				3.5387	2.61597	3.66653		0.95684	1.17096	0.893115
0.1775	24.905	29.3015	28.513				3.54013	2.61331	3.64803		0.957495	1.17579	0.892869
0.17792	24.8665	28.8281	28.4712				3.49981	2.66915	3.63353		0.958887	1.14729	0.893015
0.17833	25.0404	29.0235	28.6213				3.53332	2.67449	3.70457		0.959605	1.12848	0.893334
0.17875	25.2219	29.2623	28.9206				3.45197	2.68481	3.6567		0.960243	1.10924	0.894031
0.17917	25.3873	29.5104	29.0322				3.4247	2.64228	3.6701		0.961244	1.0951	0.894612
0.17958	25.5511	29.4626	28.6019				3.48501	2.67727	3.69328		0.961814	1.08847	0.894879
0.18	25.3065	29.5443	28.9109				3.54651	2.70345	3.60783		0.962335	1.08521	0.895555
0.18042	25.4735	29.6514	29.0093				3.56295	2.71132	3.64458		0.963036	1.09263	0.895639
0.18083	25.5414	29.3211	28.8774				3.60334	2.6922	3.67206		0.963199	1.10904	0.896038
0.18125	25.6921	29.091	29.1323				3.55954	2.68461	3.70137		0.963897	1.11324	0.896725
0.18167	25.5226	29.4678	28.9757				3.54443	2.72087	3.70216		0.96434	1.10513	0.897885
0.18208	25.5323	29.5911	28.8615				3.53537	2.74462	3.74174		0.965001	1.10261	0.89896
0.1825	25.5916	29.9089	29.2279				3.63962	2.74149	3.76189		0.965321	1.10257	0.899567
0.18292	25.7157	29.6466	29.4494				3.60963	2.70156	3.68953		0.965897	1.10114	0.899873
0.18333	25.921	29.9516	29.2379				3.6314	2.70656	3.75822		0.967368	1.09664	0.899745
0.18375	26.0169	30.2025	29.2468				3.65419	2.73267	3.66935		0.968109	1.09357	0.899813
0.18417	25.8724	29.9029	29.2576				3.61768	2.73126	3.74331		0.969357	1.09292	0.900405
0.18458	26.0443	29.9175	29.31				3.60256	2.71969	3.76044		0.970556	1.0975	0.900922
0.185	26.1344	30.3676	29.2761				3.62583	2.74037	3.73464		0.971603	1.1018	0.901827
0.18542	25.9991	30.5444	29.3959				3.63216	2.76762	3.73949		0.972609	1.09176	0.902331
0.18583	26.3219	30.2043	29.3734				3.64269	2.77704	3.72161		0.973417	1.09005	0.902776
0.18625	26.4017	30.2527	29.6146				3.66598	2.79949	3.80361		0.975012	1.09828	0.903009
0.18667	26.483	30.4068	29.6095				3.64285	2.83362	3.75517		0.975414	1.11145	0.903649
0.18708	26.551	30.7583	29.5562				3.62716	2.75789	3.6941		0.976434	1.13209	0.904162
0.1875	26.6595	30.8245	29.4812				3.60737	2.77714	3.74449		0.977789	1.15043	0.905009
0.18792	26.5185	30.1865	29.5078				3.69638	2.81708	3.74862		0.978684	1.16888	0.905913
0.18833	26.5583	30.3576	29.7023				3.73916	2.82099	3.77177		0.979038	1.18368	0.906433
0.18875	26.4365	30.3297	29.5964				3.70861	2.80702	3.70389		0.979737	1.19778	0.907283
0.18917	26.4724	30.5392	29.5999				3.65096	2.83971	3.82618		0.980605	1.24075	0.907748
0.18958	26.3916	30.3446	29.492				3.66726	2.8603	3.77144		0.981192	1.29837	0.908149
0.19	26.7767	30.3701	29.5736				3.68145	2.82447	3.83507		0.982126	1.35739	0.908368
0.19042	26.8019	30.8233	29.7693				3.73988	2.88096	3.78149		0.983527	1.41412	0.908902
0.19083	26.7866	30.9957	29.5874				3.71752	2.87633	3.71731		0.984323	1.4735	0.909798
0.19125	26.8168	30.6127	29.8226				3.67522	2.86723	3.80831		0.985855	1.52922	0.909997
0.19167	27.1854	30.4805	29.9535				3.68875	2.86528	3.82079		0.987183	1.58206	0.910532
0.19208	27.0242	30.7939	29.9642				3.72187	2.8394	3.78539		0.987528	1.62028	0.910951
0.1925	26.9917	31.1345	29.9866				3.80978	2.8365	3.80362		0.987636	1.64183	0.911596
0.19292	27.2487	30.9594	30.1999				3.78819	2.83295	3.75581		0.988526	1.67756	0.912507
0.19333	26.9659	31.2747	30.2017				3.82233	2.86088	3.77926		0.988876	1.69077	0.912628
0.19375	27.2719	31.2058	30.1102				3.74937	2.86505	3.91387		0.989839	1.67069	0.913504
0.19417	27.285	31.1101	30.0217				3.72685	2.90284	3.85324		0.991148	1.6338	0.91441
0.19458	27.2297	30.9013	30.134				3.74416	2.91148	3.88279		0.99233	1.60989	0.91515
0.195	27.3499	31.0158	30.0534				3.79522	2.92301	3.78766		0.993139	1.57629	0.915716
0.19542	27.6337	30.7464	30.0115				3.74081	2.96779	3.85698		0.994115	1.52849	0.915982
0.19583	27.6304	30.813	30.2858				3.76565	2.91114	3.85774		0.994723	1.48796	0.916394
0.19625	27.49	30.8502	30.3581				3.74211	2.91171	3.92902		0.995105	1.45685	0.916645
0.19667	27.3536	31.2831	30.3446				3.77175	2.94221	3.82805		0.996586	1.44063	0.917568
0.19708	27.4515	31.6201	30.4161				3.77539	2.94031	3.88598		0.997978	1.45535	0.917858
0.1975	27.8959	31.3588	30.4235				3.80392	2.95279	3.86027		0.999144	1.47067	0.918124
0.19792	27.8217	31.5147	30.4249				3.82018	2.98559	3.81514		1.00055	1.51293	0.919251
0.19833	27.6567	31.749	30.3328				3.81414	2.97752	3.90866		1.00143	1.55073	0.919398
0.19875	27.7007	32.9951	30.1342				3.78691	2.9468	3.80841		1.00152	1.58032	0.919219
0.19917	27.7891	31.1841	30.523				3.80506	2.94915	3.84187		1.00122	1.5977	0.919377
0.19958	27.8453	31.4428	30.5814				3.85179	2.99252	3.87493		1.00206	1.62822	0.919313
0.2	27.9554	31.5716	30.5324				3.83117	2.99379	3.92125		1.00241	1.64532	0.919138
0.20042	27.9934	32.0486	30.4764				3.85463	2.96941	3.89518		1.00238	1.63562	0.919374
0.20083	28.0688	31.7474	30.4745				3.84941	2.99396	3.83113		1.00237	1.61129	0.919808
0.20125	28.4053	31.8319	30.4178				3.83842	2.98077	3.89004		1.00251	1.61301	0.919516
0.20167	28.0075	32.0135	30.6128				3.82056	2.98012	3.913		1.00273	1.59184	0.919828
0.20208	28.0903	31.9992	30.8262				3.87135	3.02035	3.85121		1.00295	1.55462	0.920095
0.2025	28.2012	31.9971	30.6864				3.87683	3.01482	3.85291		1.00291	1.5085	0.919725
0.20292	28.5709	31.8956	30.7583				3.86437	3.03317	3.86569		1.00322	1.46614	0.919922
0.20333	28.4709	32.1694	31.0001				3.85048	3.05724	3.94744		1.00383	1.4276	0.920501
0.20375	28.4329	31.8663	31.0458				3.93748	3.03673	3.92856		1.00553	1.38667	0.921231
0.20417	28.302	32.7307	31.3166				3.92627	3.03855	3.92442		1.00649	1.35059	0.922148
0.20458	28.3551	32.2727	31.1945				3.8666	3.08115	3.92773		1.0074	1.35867	0.922854
0.205	28.3111	32.1912	31.2309				3.89202	3.10105	3.90929		1.00885	1.37852	0.923091
0.20542	28.3745	32.4051	31.3161				3.95536	3.00958	3.94365		1.00963	1.40504	0.923464
0.20583	28.4477	32.297	31.3002				3.94328	2.9961	3.90614		1.00955	1.4181	0.923777
0.20625	28.5875	32.1576	31.241				3.91909	2.99176	3.97121		1.01003	1.44291	0.923319
0.20667	28.765	32.5786	31.4688				3.9584	3.03824	3.90381		1.01073	1.47167	0.923636
0.20708	28.6609	32.1862	31.7001				3.92181	3.06093	3.95372		1.01101	1.51105	0.923841
0.2075	28.5839	32.2435	31.7849				3.93592	3.11042	3.94514		1.0104	1.5578	0.924331
0.20792	28.7521	32.1657	31.6943				3.98818	3.11757	4.01554		1.01034	1.60861	0.924878
0.20833	28.7587	32.1826	31.653				3.95234	3.07373	3.96762		1.0098	1.65457	0.924913
0.20875	28.5989	32.6419	31.6751				3.90533	3.09919	3.99626		1.00926	1.69667	0.924818
0.20917	28.8438	32.7545	31.8531				3.92043	3.1077	3.98714		1.00872	1.72249	0.924976
0.20958	29.0273	33.1633	31.8652				3.9869	3.11956	4.00383		1.00819	1.73738	0.925411
0.21	29.073	32.9348	31.8338				3.98106	3.14904	4.00508		1.00821	1.73436	0.925355
0.21042	29.0909	32.6988	31.8367				3.98181	3.13444	3.99325		1.00847	1.70728	0.925169
0.21083	29.379	32.6484	31.8851				3.99115	3.15072	4.04614		1.00825	1.71229	0.925702
0.21125	28.9986	32.8873	31.787				3.98998	3.18356	3.97644		1.00797	1.72185	0.925781
0.21167	29.0259	32.7587	31.7452				4.04442	3.16082	4.00046		1.00841	1.69549	0.925938
0.21208	29.0446	32.8091	31.5398				3.99192	3.17334	4.01421		1.00928	1.67246	0.925556
0.2125	28.9258	32.945	31.6057				4.0124	3.15512	4.01365		1.00988	1.63143	0.924461
0.21292	28.9077	32.9751	31.5133				3.98364	3.14604	4.06896		1.01008	1.59002	0.92422
0.21333	29.1007	33.1243	31.5159				3.98616	3.16907	4.06767		1.00999	1.56792	0.924235
0.21375	29.066	32.7336	31.5681				4.00989	3.20816	4.04439		1.01063	1.56206	0.924371
0.21417	29.2705	32.766	31.7584				3.96685	3.17375	4.04569		1.01166	1.5802	0.924192
0.21458	29.6337	32.8811	31.722				4.04957	3.18973	3.98684		1.01236	1.61369	0.923903
0.215	29.4876	33.1137	31.8837				4.02389	3.21499	4.00959		1.01293	1.67528	0.923968
0.21542	29.4127	33.1547	31.8817				4.04362	3.24132	4.02675		1.01343	1.70529	0.923886
0.21583	29.2655	32.9513	31.7037				4.05245	3.22739	3.97047		1.01437	1.72714	0.923941
0.21625	29.4719	33.0803	31.8744				4.03301	3.2034	3.95433		1.01526	1.77456	0.923463
0.21667	29.6858	32.918	31.5783				4.07938	3.23987	4.01016		1.01579	1.81675	0.92301
0.21708	29.3527	33.3591	31.7337				4.07064	3.23485	3.99382		1.01602	1.86424	0.923252
0.2175	29.4141	33.1766	31.8536				4.11474	3.23587	4.10742		1.01668	1.92318	0.923174
0.21792	29.3657	33.6873	32.034				4.0909	3.25948	3.98995		1.01718	1.96397	0.923171
0.21833	29.3336	33.6196	31.9537				4.07822	3.1867	3.99787		1.01795	1.97765	0.922937
0.21875	29.2808	33.6871	32.0667				4.04382	3.14026	4.07393		1.01822	1.96748	0.923038
0.21917	29.7692	33.5419	31.9946				3.9967	3.21731	4.01548		1.01893	1.93389	0.923391
0.21958	29.766	33.7042	31.9206				4.08769	3.24364	3.96772		1.01993	1.90007	0.923855
0.22	29.8909	33.6271	32.0739				4.04978	3.24361	4.02445		1.0212	1.89336	0.924626
0.22042	29.976	33.2068	32.1507				4.04087	3.27225	4.07705		1.02186	1.8999	0.92468
0.22083	29.5544	33.5863	32.3257				4.02317	3.27243	3.98586		1.02228	1.90858	0.924924
0.22125	29.6936	33.6725	32.1576				4.07987	3.286	4.01653		1.02305	1.90896	0.925839
0.22167	29.9276	34.4106	32.5293				4.09517	3.31892	4.0673		1.02423	1.90702	0.926399
0.22208	30.1448	33.8598	32.6216				4.01626	3.30493	4.11747		1.02544	1.90922	0.926621
0.2225	29.9678	33.7508	32.7154				4.07075	3.32746	3.94553		1.02657	1.88626	0.926458
0.22292	30.0706	33.5746	32.6914				4.05368	3.33262	4.07812		1.02749	1.86166	0.926426
0.22333	30.0996	33.072	32.8078				4.08077	3.30046	4.08598		1.02865	1.84964	0.926187
0.22375	30.1577	33.6502	32.4663				4.12822	3.28934	4.05044		1.029	1.88493	0.926059
0.22417	29.9234	33.5911	32.5435				4.12448	3.31506	4.09495		1.02997	1.90539	0.925932
0.22458	29.9933	33.8263	32.6835				4.08215	3.31578	4.1025		1.03084	1.89932	0.925842
0.225	29.881	34.1007	32.6365				4.06527	3.27872	4.17214		1.03153	1.89314	0.925601
0.22542	30.062	33.5416	32.449				4.10707	3.29563	4.0968		1.03212	1.88057	0.925751
0.22583	29.8246	34.1786	32.3887				4.10605	3.30061	4.09125		1.03288	1.87449	0.925455
0.22625	29.7702	33.8561	32.2097				4.05635	3.31317	4.11609		1.03339	1.87757	0.925547
0.22667	29.7709	33.5548	32.2846				4.16385	3.29461	4.08695		1.03375	1.87011	0.926016
0.22708	30.1851	34.2037	32.4391				4.12739	3.31138	4.09066		1.03405	1.88483	0.926213
0.2275	30.188	34.2235	32.607				4.1343	3.34032	4.1052		1.03389	1.91337	0.926042
0.22792	29.9768	33.653	32.7392				4.10846	3.27206	4.08979		1.03309	1.94189	0.926171
0.22833	30.3595	34.1476	32.5415				4.11901	3.36246	4.06515		1.0336	1.94965	0.926027
0.22875	30.1921	34.2653	32.3787				4.10864	3.35909	4.11296		1.03375	1.95877	0.926008
0.22917	30.2826	34.6144	32.1534				4.13077	3.35001	4.09274		1.03414	1.96975	0.925898
0.22958	30.1864	33.8062	32.2646				4.15429	3.34937	4.09394		1.03448	1.96842	0.926437
0.23	30.3912	33.9386	32.5439				4.12944	3.3626	4.05982		1.0348	1.97699	0.926787
0.23042	30.4776	34.4127	32.6432				4.15733	3.37975	4.15143		1.0354	1.97959	0.927123
0.23083	30.5089	34.0317	32.8728				4.16774	3.39505	4.09348		1.0359	1.98511	0.927582
0.23125	30.9523	33.9917	32.5331				4.13945	3.40236	4.15044		1.03639	1.99964	0.92751
0.23167	31.1711	34.0713	32.5969				4.22194	3.39224	4.0953		1.03758	2.02278	0.927877
0.23208	30.9551	34.1411	32.7719				4.19278	3.35697	4.07184		1.03854	2.04278	0.929192
0.2325	31.0771	34.1323	32.8863				4.20058	3.36842	4.0988		1.04	2.0733	0.929997
0.23292	30.8096	34.129	33.1384				4.19238	3.36384	4.14727		1.04143	2.08789	0.931244
0.23333	30.8645	34.5709	32.9102				4.16242	3.36262	4.12964		1.04301	2.09709	0.932353
0.23375	30.9053	35.4464	32.7779				4.17107	3.37455	4.07772		1.0435	2.09779	0.933062
0.23417	30.8369	35.4803	33.1489				4.16975	3.38827	4.10489		1.0442	2.11443	0.933619
0.23458	30.7015	35.2983	33.2775				4.13165	3.42479	4.06505		1.04478	2.13864	0.934412
0.235	29.9922	34.3335	32.8989				4.169	3.44317	4.1505		1.04524	2.17259	0.935502
0.23542	30.7643	34.8477	32.9672				4.22621	3.42504	4.09955		1.04598	2.19589	0.935803
0.23583	31.0377	34.9496	33.2377				4.2251	3.40177	4.09585		1.04691	2.22052	0.936286
0.23625	30.8084	34.6869	32.87				4.21611	3.40434	4.11661		1.04734	2.24299	0.937412
0.23667	30.6739	34.6033	33.0319				4.21679	3.43788	4.08796		1.04803	2.25481	0.937964
0.23708	30.8699	34.8244	33.3648				4.23635	3.45313	4.07325		1.04869	2.25408	0.93893
0.2375	30.1464	34.655	33.6642				4.27109	3.44689	4.08591		1.04934	2.26326	0.939503
0.23792	30.8025	34.519	33.5442				4.23569	3.4609	4.1521		1.04936	2.28718	0.93997
0.23833	31.0052	34.8166	33.8059				4.22068	3.45083	4.15159		1.05021	2.329	0.940506
0.23875	30.8599	34.5936	33.8428				4.3012	3.3788	4.07021		1.0514	2.37173	0.941305
0.23917	30.7534	34.8696	33.5554				4.23094	3.43082	4.15022		1.05278	2.38691	0.942185
0.23958	31.1205	34.9315	33.5351				4.22634	3.45977	4.12476		1.05368	2.36958	0.942715
0.24	31.2018	35.3222	33.4547				4.20876	3.45283	4.22301		1.05466	2.35272	0.943483
0.24042	29.979	35.0512	33.7944				4.27585	3.4575	4.22987		1.05597	2.3276	0.944616
0.24083	30.2822	35.2796	33.7443				4.31009	3.46801	4.21247		1.05752	2.30079	0.945043
0.24125	30.8247	34.7777	33.7336				4.30357	3.4847	4.13739		1.05953	2.27133	0.945629
0.24167	30.9411	34.8275	33.7578				4.25622	3.50912	4.14336		1.06131	2.23634	0.945952
0.24208	31.0089	35.0261	33.8653				4.26234	3.5375	4.05098		1.06222	2.20958	0.946276
0.2425	30.8917	34.8772	33.8614				4.25094	3.53045	4.2005		1.06334	2.1843	0.946549
0.24292	30.9599	35.2217	33.8816				4.2803	3.48103	4.18678		1.06433	2.14761	0.946797
0.24333	30.8316	34.8474	33.8634				4.33871	3.49539	4.2075		1.0646	2.06817	0.946545
0.24375	32.3421	35.2225	33.7309				4.27453	3.54121	4.19094		1.0654	1.99397	0.946058
0.24417	31.1889	34.782	33.5797				4.27577	3.57049	4.18982		1.06597	1.94977	0.946138
0.24458	30.5607	35.1939	33.4885				4.26962	3.52951	4.15898		1.06677	1.91781	0.946651
0.245	30.73	35.6625	33.9011				4.28557	3.5099	4.20383		1.06728	1.86633	0.947216
0.24542	30.5737	35.1919	33.9592				4.29091	3.48574	4.14498		1.06761	1.804	0.948048
0.24583	30.5736	35.2796	33.8407				4.25305	3.52216	4.20113		1.06735	1.78012	0.948584
0.24625	30.6032	35.6618	34.001				4.28184	3.5398	4.1547		1.06775	1.76951	0.948807
0.24667	30.5697	35.6625	33.6788				4.28296	3.53167	4.15005		1.06796	1.74903	0.949417
0.24708	30.3874	35.705	33.8628				4.25595	3.51485	4.06252		1.06813	1.74169	0.950267
0.2475	30.4117	35.5494	33.9273				4.30149	3.52193	4.13299		1.06898	1.72911	0.951197
0.24792	30.5421	35.5034	33.7555				4.31583	3.53133	4.19133		1.06996	1.75432	0.95222
0.24833	30.5372	35.8443	33.7519				4.30343	3.53642	4.20633		1.07098	1.78761	0.953569
0.24875	30.6814	35.3823	33.6154				4.30409	3.57251	4.23899		1.07252	1.81087	0.954491
0.24917	30.4409	35.5976	33.7371				4.31311	3.60196	4.15776		1.07373	1.8329	0.954599
0.24958	30.5128	35.8164	33.8427				4.39515	3.59426	4.1702		1.0738	1.89281	0.955078
0.25	30.3903	35.5931	33.455				4.30967	3.55358	4.14239		1.0741	1.96543	0.955045
0.25042	30.422	35.7983	33.6045				4.32059	3.58077	4.0914		1.07447	1.99858	0.955457
0.25083	30.5633	35.8186	33.5078				4.24685	3.57762	4.1814		1.07499	2.02858	0.956548
0.25125	30.6709	35.9897	33.6787				4.31742	3.58047	4.12352		1.07639	2.06019	0.957217
0.25167	30.631	35.8712	33.5889				4.26698	3.59429	4.21457		1.07806	2.05962	0.957301
0.25208	30.5879	35.8248	33.8866				4.28432	3.56994	4.24324		1.07874	2.0693	0.957569
0.2525	30.5793	35.4281	33.3915				4.29102	3.58531	4.21237		1.07914	2.05937	0.958621
0.25292	30.6574	35.605	33.4766				4.28403	3.59379	4.19081		1.07908	2.06009	0.958846
0.25333	30.6678	35.9608	33.5444				4.31752	3.64972	4.20397		1.0791	2.06638	0.959112
0.25375	30.7944	35.9457	33.6779				4.30005	3.64536	4.1539		1.07927	2.05857	0.959877
0.25417	30.6095	35.5925	33.7481				4.34882	3.61477	4.21662		1.07978	2.04344	0.959751
0.25458	30.5901	36.0142	33.9585				4.35188	3.58981	4.20052		1.08018	2.02629	0.959994
0.255	30.6431	36.0669	33.9297				4.3207	3.60146	4.1283		1.08087	2.01653	0.959866
0.25542	30.7278	36.7993	33.6306				4.35374	3.61386	4.17817		1.081	1.99344	0.959583
0.25583	30.7173	36.0752	33.9928				4.30196	3.58284	4.23345		1.08062	1.98779	0.959788
0.25625	30.8187	36.5318	33.9887				4.31066	3.59552	4.17526		1.08021	1.99333	0.959746
0.25667	30.7333	36.5464	33.6968				4.35193	3.61269	4.11993		1.08018	1.98662	0.959719
0.25708	30.8801	36.1378	33.881				4.32905	3.61614	4.13664		1.08128	1.98541	0.958285
0.2575	30.8733	36.2452	34.0513				4.31527	3.59688	4.19111		1.0819	1.99	0.958274
0.25792	30.789	36.1023	34.0584				4.37628	3.64434	4.25656		1.08231	1.99919	0.958749
0.25833	30.7398	35.7569	34.1593				4.29905	3.65135	4.18793		1.08296	2.01941	0.958787
0.25875	30.7706	36.4626	34.3077				4.35029	3.63154	4.21688		1.0841	2.02997	0.959095
0.25917	30.8034	36.4271	34.2866				4.27681	3.64801	4.18485		1.08535	2.02419	0.959535
0.25958	30.8827	36.2375	34.3869				4.32292	3.65377	4.18372		1.08672	2.02518	0.959843
0.26	30.8808	35.7187	33.9441				4.32742	3.60572	4.16591		1.0875	2.04968	0.959466
0.26042	30.8285	37.6492	33.8822				4.41767	3.60651	4.19456		1.08855	2.04816	0.959013
0.26083	30.9712	36.7325	34.0116				4.31448	3.59213	4.13267		1.08892	2.04624	0.959457
0.26125	30.9138	36.4769	34.0228				4.30247	3.65567	4.19868		1.08886	2.04512	0.959807
0.26167	30.934	36.3345	34.1215				4.26761	3.64465	4.18921		1.08825	2.04728	0.961267
0.26208	30.9626	36.0297	34.3328				4.26695	3.64324	4.18219		1.08844	2.03998	0.961347
0.2625	30.9766	36.0771	34.0646				4.3558	3.62796	4.17559		1.0891	2.02181	0.961221
0.26292	31.053	36.5644	33.943				4.33097	3.63282	4.18829		1.08951	2.00537	0.960908
0.26333	30.8182	36.3851	34.0415				4.35991	3.62178	4.14748		1.08983	1.99617	0.960754
0.26375	31.097	36.3925	34.4587				4.39492	3.69005	4.1892		1.09046	1.99184	0.960534
0.26417	31.0264	36.5607	34.3091				4.38589	3.67404	4.13561		1.08997	1.99181	0.960715
0.26458	31.165	36.4524	34.2908				4.3573	3.65878	4.21405		1.08992	1.97564	0.961215
0.265	31.2745	36.5576	34.655				4.35697	3.66022	4.30544		1.09007	1.97493	0.961389
0.26542	31.0345	36.9054	34.5066				4.35624	3.68616	4.2154		1.0908	1.97338	0.961356
0.26583	31.1769	36.6528	34.5414				4.35497	3.68771	4.2287		1.09198	1.97147	0.960628
0.26625	31.258	36.7724	34.6584				4.43525	3.6666	4.1378		1.09332	1.97274	0.959808
0.26667	31.2863	36.3778	34.4786				4.39005	3.69249	4.15894		1.09433	1.97189	0.959642
0.26708	31.2069	37.0075	34.5614				4.36657	3.71098	4.17004		1.09456	1.97788	0.958896
0.2675	31.3653	36.6253	34.6649				4.33375	3.71399	4.22461		1.09499	1.97828	0.959226
0.26792	31.3934	36.5331	34.7993				4.42272	3.69914	4.23174		1.09511	1.96685	0.959257
0.26833	31.3302	36.6901	34.9319				4.41988	3.72393	4.27671		1.09476	1.9717	0.958902
0.26875	31.586	36.8737	34.916				4.39774	3.70208	4.18427		1.09578	1.96624	0.958527
0.26917	31.5343	36.6169	34.9323				4.35163	3.70318	4.18879		1.09677	1.95215	0.958357
0.26958	31.3793	37.0661	35.0999				4.38071	3.72396	4.2287		1.09747	1.93345	0.958284
0.27	31.5545	37.4191	34.9916				4.39222	3.70381	4.14373		1.0982	1.93426	0.958298
0.27042	31.5988	36.9504	35.0006				4.44422	3.7436	4.18903		1.09881	1.93294	0.958791
0.27083	31.5651	36.7178	34.9448				4.41459	3.70062	4.21453		1.09943	1.92721	0.95887
0.27125	31.5078	36.4693	34.8428				4.40726	3.75702	4.31381		1.10037	1.9279	0.959418
0.27167	31.5468	36.9359	35.0346				4.38141	3.7418	4.24139		1.10164	1.92779	0.960011
0.27208	31.5013	36.9653	34.9378				4.42419	3.77778	4.19303		1.10263	1.9159	0.960025
0.2725	31.4987	37.4032	34.953				4.4509	3.72524	4.27227		1.10286	1.90711	0.960507
0.27292	31.4556	37.1049	34.9369				4.35737	3.73456	4.18635		1.10356	1.89696	0.961048
0.27333	31.5146	37.3051	35.1039				4.39541	3.74572	4.21288		1.10382	1.88492	0.961292
0.27375	31.5786	37.2495	35.0368				4.4321	3.74351	4.12992		1.10423	1.89365	0.961763
0.27417	31.4804	37.4505	35.0289				4.4452	3.74856	4.22729		1.10509	1.90847	0.962257
0.27458	31.6279	37.0126	34.514				4.4265	3.76595	4.24068		1.10582	1.89792	0.962433
0.275	31.4638	37.4762	34.7765				4.44811	3.77533	4.18424		1.1061	1.89497	0.962379
0.27542	31.5961	37.0711	35.0618				4.37842	3.77286	4.21552		1.10655	1.90466	0.962483
0.27583	31.7239	37.3426	34.982				4.42788	3.7872	4.2785		1.10696	1.90447	0.961467
0.27625	31.7424	37.5776	35.1628				4.3694	3.78233	4.22632		1.10717	1.90524	0.96107
0.27667	31.824	37.1983	35.1739				4.41404	3.7809	4.19634		1.10734	1.91325	0.960522
0.27708	31.8362	37.3074	35.0089				4.41953	3.76895	4.21377		1.10901	1.93222	0.96003
0.2775	31.8743	37.1674	34.9213				4.38821	3.79596	4.24928		1.11	1.94107	0.959957
0.27792	31.91	37.5605	34.9132				4.42713	3.77844	4.18259		1.11115	1.94708	0.960004
0.27833	31.7091	37.2918	34.7835				4.39528	3.75718	4.18771		1.11249	1.94221	0.96016
0.27875	31.7768	37.4332	34.5916				4.39787	3.77262	4.18388		1.11271	1.93464	0.959839
0.27917	31.9269	37.1698	34.6218				4.41581	3.74376	4.20495		1.11255	1.93187	0.959817
0.27958	31.6795	37.2365	34.6636				4.44409	3.64427	4.24368		1.11363	1.93274	0.960282
0.28	31.8118	37.4617	34.6451				4.50155	3.72866	4.25154		1.11418	1.92632	0.960777
0.28042	31.7906	37.5527	34.632				4.4111	3.78918	4.18368		1.11439	1.92997	0.961436
0.28083	31.6974	37.6332	34.7218				4.43675	3.80933	4.21621		1.11432	1.93838	0.962247
0.28125	31.7602	37.5025	34.8766				4.47813	3.80866	4.18633		1.11453	1.94245	0.963086
0.28167	31.7396	38.1156	34.7281				4.46018	3.80872	4.2598		1.11469	1.9425	0.963551
0.28208	31.7999	37.3115	34.6605				4.43191	3.79012	4.25437		1.11556	1.95142	0.963888
0.2825	31.835	37.715	34.8211				4.39613	3.82321	4.15814		1.11659	1.96598	0.964211
0.28292	31.8085	37.6557	34.9393				4.29818	3.78356	4.18409		1.11704	1.97557	0.965057
0.28333	31.8408	37.7106	34.8721				4.42334	3.72788	4.2128		1.11802	1.97802	0.965855
0.28375	32.0083	38.3196	34.919				4.39815	3.75469	4.18584		1.11917	1.98572	0.96676
0.28417	32.1594	38.0153	34.7835				4.41572	3.79266	4.2462		1.11931	1.97045	0.967887
0.28458	31.9038	37.2782	34.928				4.41973	3.83946	4.1414		1.12034	1.95595	0.968858
0.285	32.0705	38.1514	34.7481				4.41874	3.81832	4.17696		1.1219	1.94354	0.969954
0.28542	31.9755	38.2216	34.978				4.45072	3.80132	4.19498		1.12385	1.92448	0.971182
0.28583	31.9769	37.9005	34.7088				4.40826	3.71082	4.1532		1.12432	1.90456	0.972511
0.28625	32.0704	37.8121	34.9602				4.43597	3.79893	4.21961		1.12471	1.86959	0.973862
0.28667	31.9606	37.8009	34.9968				4.3956	3.81493	4.17429		1.12568	1.82019	0.974263
0.28708	32.28	37.907	34.8798				4.41668	3.82914	4.19931		1.12616	1.77254	0.975395
0.2875	32.0987	37.8684	34.8826				4.49439	3.84226	4.21167		1.12735	1.75309	0.975765
0.28792	32.2603	37.7835	35.1813				4.51167	3.86543	4.23882		1.12848	1.74093	0.976593
0.28833	32.2692	38.1378	35.068				4.4301	3.8421	4.23793		1.12993	1.73895	0.977276
0.28875	32.3485	38.0782	34.9329				4.48198	3.82158	4.24199		1.13104	1.76134	0.977289
0.28917	32.117	38.2856	34.9611				4.47752	3.82131	4.21847		1.13181	1.76938	0.977168
0.28958	32.1819	38.4037	34.8935				4.40851	3.84594	4.2808		1.13191	1.76838	0.977677
0.29	32.3232	38.5806	35.0339				4.4204	3.86226	4.17998		1.13125	1.80055	0.977963
0.29042	32.3937	38.4598	35.2899				4.42711	3.84826	4.1959		1.13265	1.86084	0.978457
0.29083	32.4677	38.2874	35.517				4.47905	3.8734	4.16692		1.13445	1.93215	0.978647
0.29125	32.4918	37.9212	35.4003				4.37622	3.85713	4.19312		1.1357	2.01285	0.979835
0.29167	32.5861	38.0089	35.2374				4.4399	3.85047	4.12703		1.1361	2.0901	0.980114
0.29208	32.5374	38.1349	35.4247				4.42326	3.86799	4.26124		1.13655	2.14865	0.980487
0.2925	32.6255	38.446	35.5328				4.44294	3.85215	4.23708		1.13634	2.19587	0.98121
0.29292	32.6316	38.3949	35.7576				4.43525	3.8406	4.17547		1.13637	2.21813	0.981208
0.29333	32.538	38.5848	35.5806				4.50177	3.87538	4.10323		1.1374	2.24471	0.980803
0.29375	32.7344	39.096	35.5051				4.47666	3.86719	4.15309		1.13775	2.28105	0.981708
0.29417	32.4924	38.5389	35.5132				4.45383	3.87539	4.24732		1.13804	2.30754	0.982665
0.29458	32.5884	38.444	35.5602				4.54975	3.87086	4.26534		1.13933	2.31438	0.982787
0.295	32.6297	38.9794	35.578				4.50644	3.88006	4.27081		1.14054	2.28726	0.982813
0.29542	32.5983	38.3987	35.6846				4.48376	3.8895	4.19877		1.14163	2.24766	0.983211
0.29583	32.7421	38.2435	35.4778				4.5058	3.87235	4.25013		1.14163	2.1968	0.9835
0.29625	32.7721	38.8832	35.4801				4.48466	3.85581	4.29714		1.14308	2.15353	0.983873
0.29667	32.8647	39.5378	35.5957				4.49014	3.85872	4.19034		1.14385	2.11873	0.984641
0.29708	32.8265	38.7946	35.6931				4.43623	3.85502	4.19246		1.14502	2.08776	0.984613
0.2975	32.6986	38.8137	35.7315				4.46482	3.87235	4.1988		1.14564	2.05354	0.984976
0.29792	32.9449	38.6415	35.6608				4.51568	3.88384	4.25564		1.14524	2.01588	0.986548
0.29833	32.9626	38.6012	35.6562				4.51468	3.91493	4.2487		1.14579	1.97892	0.987239
0.29875	33.012	38.6291	35.8099				4.51779	3.89592	4.21751		1.14711	1.95892	0.986941
0.29917	32.843	39.0384	35.9096				4.49698	3.91635	4.2476		1.14788	1.93913	0.987292
0.29958	32.895	38.9667	35.6999				4.47854	3.86851	4.24208		1.14806	1.92716	0.987551
0.3	32.8584	39.1687	35.679				4.53397	3.92235	4.21291		1.1479	1.91949	0.987669
0.30042	32.9026	39.0505	35.8326				4.55916	3.91443	4.18305		1.1485	1.92664	0.987687
0.30083	33.0742	38.9313	35.5243				4.53919	3.92333	4.22458		1.14768	1.92641	0.988089
0.30125	32.9945	39.0025	35.5684				4.47227	3.96272	4.22772		1.14741	1.91311	0.98793
0.30167	33.0773	39.0954	35.4593				4.48844	3.92401	4.20318		1.14747	1.91071	0.988144
0.30208	33.0264	38.8824	35.6536				4.53327	3.90063	4.2867		1.147	1.92773	0.988677
0.3025	32.9882	40.3154	35.7746				4.4858	3.92441	4.26561		1.14831	1.92004	0.988869
0.30292	33.1658	39.3248	35.7064				4.5282	3.94444	4.27333		1.14883	1.91478	0.988525
0.30333	33.1135	38.8827	35.7672				4.54189	3.9419	4.23181		1.14939	1.90807	0.988544
0.30375	33.0833	38.7462	35.62				4.51056	3.97284	4.18866		1.14979	1.88215	0.988289
0.30417	33.1277	38.8293	35.6251				4.51279	3.92463	4.21828		1.14945	1.85323	0.987859
0.30458	33.2229	39.0643	35.5604				4.54118	3.94598	4.22417		1.14899	1.83198	0.987829
0.305	33.4128	39.0547	35.6531				4.55337	3.95348	4.21626		1.14866	1.81283	0.987971
0.30542	33.1394	39.1207	35.5951				4.47998	3.96579	4.24762		1.15005	1.80304	0.988159
0.30583	33.2278	38.6948	35.6418				4.55625	3.98346	4.25645		1.15077	1.7919	0.988574
0.30625	33.3642	39.2489	35.6155				4.49317	3.96124	4.26887		1.15171	1.76453	0.98864
0.30667	33.2039	39.008	35.4793				4.53248	3.96389	4.2773		1.15303	1.7316	0.988476
0.30708	33.3126	39.2768	35.81				4.50228	3.96055	4.21303		1.1531	1.70885	0.987605
0.3075	33.0542	39.3034	35.9057				4.49776	3.92943	4.20056		1.15301	1.67787	0.987504
0.30792	33.172	39.4531	35.8915				4.48153	3.94753	4.25609		1.15314	1.64615	0.987771
0.30833	33.3095	39.4819	36.0015				4.45888	3.96641	4.22738		1.15324	1.63785	0.988238
0.30875	33.3508	39.0536	35.8476				4.49386	3.97696	4.25216		1.15362	1.64362	0.98915
0.30917	33.4946	39.0075	36.1425				4.56785	3.945	4.25882		1.15406	1.64733	0.989173
0.30958	33.2539	39.3644	35.8783				4.51492	3.98382	4.18242		1.15525	1.65159	0.988855
0.31	33.4945	38.9875	36.1388				4.56041	3.97361	4.21324		1.15554	1.6567	0.988975
0.31042	33.3902	39.3763	36.1452				4.49833	3.96324	4.20416		1.1561	1.66868	0.989028
0.31083	33.4278	39.768	36.0472				4.50547	3.94221	4.24504		1.15633	1.66676	0.989229
0.31125	33.5706	39.3892	36.157				4.44997	3.96853	4.23301		1.15721	1.65618	0.989319
0.31167	33.3971	39.503	36.2115				4.5306	4.01183	4.20023		1.15794	1.67925	0.990003
0.31208	33.5697	39.5498	35.9787				4.46382	3.99175	4.16775		1.15875	1.71557	0.990145
0.3125	33.6163	39.5108	36.2762				4.4855	4.02479	4.1464		1.15882	1.74791	0.990256
0.31292	33.7052	39.4327	36.008				4.46896	3.9679	4.21534		1.15897	1.74336	0.98996
0.31333	33.7212	39.2917	36.2383				4.52101	3.96684	4.22135		1.15936	1.74443	0.989705
0.31375	33.6861	39.5941	36.0277				4.46453	3.97368	4.15853		1.16073	1.75501	0.989616
0.31417	33.5904	39.8477	36.2836				4.52198	3.97364	4.18054		1.16141	1.76644	0.990021
0.31458	33.6913	39.515	36.0833				4.50603	4.02022	4.20919		1.16219	1.7696	0.989593
0.315	33.7627	39.5348	36.3416				4.504	3.97715	4.16863		1.16271	1.7678	0.989394
0.31542	33.779	39.6501	36.1362				4.54633	4.01143	4.19239		1.1632	1.79634	0.989409
0.31583	33.7558	39.4269	36.2844				4.53911	3.97442	4.1663		1.16348	1.83031	0.989271
0.31625	33.9331	39.7373	36.168				4.51809	3.9756	4.18334		1.16451	1.83195	0.989119
0.31667	33.9052	39.5809	36.1414				4.50234	3.98431	4.24423		1.16554	1.83045	0.988968
0.31708	33.7833	39.851	36.236				4.4642	3.9996	4.25954		1.16671	1.83663	0.989198
0.3175	33.8322	40.086	36.2758				4.45781	3.99234	4.16886		1.16785	1.86281	0.98993
0.31792	33.9379	39.6627	36.2643				4.49363	3.95776	4.14591		1.16931	1.88123	0.990074
0.31833	34.0789	40.0325	36.3223				4.51681	3.97688	4.18178		1.1705	1.89041	0.989842
0.31875	33.9635	39.9621	36.2388				4.48376	4.03304	4.22657		1.17135	1.884	0.989657
0.31917	33.7917	40.054	36.1555				4.54445	4.01831	4.22555		1.17236	1.88649	0.990019
0.31958	33.9475	39.9244	36.2887				4.52042	4.03007	4.2165		1.17349	1.89049	0.990454
0.32	34.1569	40.196	36.4295				4.53094	4.00436	4.20855		1.17503	1.88881	0.990651
0.32042	34.186	39.8667	36.3058				4.49968	3.94344	4.20213		1.17605	1.88814	0.990685
0.32083	34.0464	40.3692	36.3787				4.48017	3.98103	4.21629		1.17689	1.89125	0.990761
0.32125	34.0974	39.8979	36.4443				4.50955	4.00379	4.26854		1.17834	1.90098	0.990794
0.32167	34.208	39.8475	36.5058				4.49376	3.9841	4.20383		1.17925	1.91427	0.990237
0.32208	34.119	40.1627	36.6073				4.50823	3.97667	4.17558		1.18045	1.91686	0.989577
0.3225	34.2857	40.1905	36.5403				4.56549	4.01645	4.18591		1.18198	1.91549	0.989607
0.32292	34.2968	40.1667	36.3864				4.53653	4.01183	4.17311		1.18283	1.91748	0.990314
0.32333	34.2912	40.7192	36.4978				4.54295	4.02842	4.20891		1.18347	1.92375	0.99082
0.32375	34.4435	40.1794	36.4019				4.53772	4.03377	4.16603		1.18375	1.92426	0.990681
0.32417	34.7162	40.0135	36.608				4.56284	4.01261	4.25923		1.18417	1.9192	0.990021
0.32458	34.5312	40.5017	36.4064				4.52351	4.01974	4.18023		1.18401	1.9231	0.990295
0.325	34.3841	40.3865	36.4				4.52228	4.00559	4.19618		1.18422	1.92434	0.990905
0.32542	34.2607	40.9121	36.4556				4.5339	4.01954	4.25669		1.18424	1.9239	0.991539
0.32583	34.3491	41.0414	36.6221				4.53995	4.02226	4.20123		1.1841	1.91617	0.992609
0.32625	34.4532	40.4163	36.592				4.53569	4.03236	4.1575		1.18423	1.93364	0.993442
0.32667	34.6778	40.9801	36.6036				4.55404	4.08709	4.22136		1.18481	2.00776	0.993809
0.32708	34.3902	40.7193	36.6607				4.63033	4.05947	4.16838		1.18523	2.146	0.994035
0.3275	34.4777	40.6578	36.5038				4.50546	4.06388	4.2133		1.18544	2.44547	0.994227
0.32792	34.5599	40.8354	36.5526				4.58647	4.03911	4.23473		1.1849	2.79711	0.994458
0.32833	34.5251	41.0019	36.5012				4.57662	4.02138	4.19025		1.18476	3.15449	0.995209
0.32875	34.4981	40.7928	36.5449				4.562	4.05308	4.18402		1.18489	3.52772	0.996364
0.32917	34.5031	40.7128	36.5002				4.54407	4.09741	4.21571		1.1851	3.88476	0.996412
0.32958	34.6689	41.0512	36.5164				4.55341	4.05325	4.18042		1.18543	4.22784	0.996792
0.33	34.8098	40.9551	36.5574				4.54031	4.02604	4.19564		1.18503	4.5684	0.99755
0.33042	34.8983	40.9137	36.3716				4.52293	4.06503	4.22903		1.1853	4.90687	0.998018
0.33083	34.8343	40.6779	36.6402				4.53081	4.00795	4.20857		1.18613	5.20453	0.998476
0.33125	34.6144	40.5221	36.8851				4.53594	4.06877	4.24295		1.18566	5.45825	0.999314
0.33167	34.7223	40.561	36.6286				4.55932	4.04895	4.2036		1.18462	5.64365	1.00008
0.33208	34.7499	40.6177	36.677				4.55955	4.08853	4.22555		1.18394	5.65946	1.00079
0.3325	34.9532	40.8589	36.8952				4.53493	4.06435	4.17612		1.18543	5.62597	1.00134
0.33292	35.097	41.165	36.8907				4.52832	4.05628	4.21773		1.18668	5.57505	1.00179
0.33333	35.0007	41.065	36.6947				4.52763	3.99515	4.11818		1.18693	5.49958	1.00212
0.33375	34.86	41.0157	36.978				4.54301	4.1252	4.21659		1.1874	5.42423	1.00314
0.33417	34.9584	40.6329	36.8819				4.54434	4.09463	4.182		1.18804	5.35374	1.00346
0.33458	35.0912	41.2801	36.879				4.5072	4.07876	4.17829		1.189	5.29358	1.00366
0.335	34.8897	41.2532	36.532				4.51906	4.08736	4.20223		1.18929	5.23674	1.0029
0.33542	34.91	41.0032	36.6589				4.53375	4.09797	4.2591		1.18906	5.18472	1.00302
0.33583	34.9281	41.1736	36.8298				4.50955	4.08026	4.22213		1.18916	5.12875	1.00358
0.33625	35.0921	40.8937	36.5931				4.51711	4.093	4.20593		1.19035	5.07219	1.00431
0.33667	35.0701	41.1662	36.8344				4.53778	4.11496	4.23113		1.19102	5.00729	1.00469
0.33708	35.1315	41.3583	36.5119				4.50916	4.07986	4.18501		1.19085	4.93077	1.0052
0.3375	35.1838	41.1539	36.6134				4.52368	4.08955	4.19098		1.19157	4.86261	1.00598
0.33792	34.9859	41.4451	36.3553				4.52123	4.06779	4.23776		1.19284	4.81472	1.00592
0.33833	35.1922	41.0664	36.7094				4.51379	4.04255	4.15964		1.1943	4.77824	1.00547
0.33875	35.2525	41.86	36.9336				4.51026	4.05056	4.18616		1.19514	4.7545	1.00578
0.33917	35.3309	43.5699	36.8799				4.51437	4.06094	4.13864		1.19605	4.72334	1.00621
0.33958	35.4576	41.4347	36.9069				4.50175	4.05052	4.21065		1.19734	4.66468	1.00777
0.34	35.4722	41.9736	37.1195				4.50489	4.08889	4.20794		1.19856	4.59608	1.00849
0.34042	35.4982	41.9385	36.8056				4.50754	4.08099	4.2028		1.20072	4.52292	1.00838
0.34083	35.462	41.6495	36.8269				4.50685	4.10692	4.21491		1.20157	4.45679	1.00879
0.34125	35.5835	43.2775	36.9714				4.50888	4.08084	4.23867		1.20275	4.40696	1.00958
0.34167	35.5725	42.0129	36.8602				4.49241	4.03949	4.25171		1.20402	4.36493	1.01006
0.34208	35.4264	41.9202	36.8518				4.5119	4.03154	4.25511		1.20444	4.32345	1.01004
0.3425	35.4768	42.1365	36.9632				4.52992	4.03408	4.26061		1.20466	4.26643	1.01163
0.34292	35.4992	41.9586	37.048				4.48694	4.04394	4.14359		1.20514	4.20595	1.01317
0.34333	35.5616	41.8215	37.172				4.51963	4.07612	4.27097		1.20556	4.15035	1.01391
0.34375	35.512	41.8643	37.1801				4.50595	4.10672	4.21451		1.20515	4.09113	1.01336
0.34417	35.6217	42.1124	37.2601				4.52787	4.07812	4.17579		1.20376	4.04777	1.0132
0.34458	35.7474	42.0811	37.0035				4.51464	4.05227	4.17282		1.20317	4.01088	1.01366
0.345	35.6425	42.4401	37.0587				4.53059	4.06772	4.17855		1.20277	3.98347	1.01448
0.34542	35.7382	42.0212	37.1605				4.50137	4.05528	4.20762		1.20274	3.94842	1.0141
0.34583	35.8897	41.8316	37.0071				4.54634	4.08794	4.21535		1.20267	3.91428	1.014
0.34625	35.846	42.0575	37.2037				4.53098	4.10781	4.15589		1.20264	3.88679	1.0145
0.34667	35.9678	42.0712	36.8967				4.51845	4.14066	4.13501		1.20181	3.86058	1.01515
0.34708	35.9826	42.005	37.2657				4.50685	4.10441	4.23061		1.20198	3.83929	1.01433
0.3475	35.9231	42.0774	37.4393				4.52314	4.08663	4.19546		1.20135	3.81232	1.01375
0.34792	36.1905	42.0751	37.4517				4.48915	4.08928	4.18345		1.20136	3.7723	1.01349
0.34833	36.0104	42.0341	37.2803				4.50077	4.09681	4.24803		1.20241	3.73736	1.01467
0.34875	35.9691	42.4009	37.1569				4.5386	4.08684	4.23099		1.20357	3.71358	1.0146
0.34917	36.0425	42.6305	37.3371				4.53032	4.11533	4.19468		1.20483	3.69334	1.01455
0.34958	36.1355	42.8469	37.4761				4.52977	4.10452	4.13137		1.20543	3.66862	1.0144
0.35	36.1915	42.6455	37.3177				4.5265	4.1129	4.19465		1.20618	3.6434	1.01423
0.35042	36.3482	42.4389	37.322				4.58782	4.12145	4.15261		1.20664	3.61287	1.01402
0.35083	36.3355	42.1877	37.3222				4.5538	4.08783	4.21788		1.20598	3.58038	1.01396
0.35125	36.2298	42.696	37.4984				4.54055	4.10594	4.14525		1.20613	3.55577	1.01403
0.35167	36.3728	42.6454	37.5689				4.5618	4.05818	4.16898		1.20581	3.53336	1.01414
0.35208	36.3685	42.2996	37.5097				4.55307	4.07665	4.21201		1.2059	3.5166	1.01396
0.3525	36.3596	42.5693	37.4714				4.57219	4.07356	4.19356		1.20612	3.51221	1.01405
0.35292	36.1467	42.6258	37.5183				4.57751	4.07733	4.15602		1.20723	3.50032	1.01334
0.35333	36.3825	42.5096	37.4835				4.54463	4.11983	4.13237		1.20845	3.49133	1.01367
0.35375	36.5233	42.5606	37.4734				4.55575	4.14584	4.13509		1.20949	3.47883	1.01328
0.35417	36.5791	42.5302	37.5038				4.55833	4.14239	4.20556		1.21069	3.45864	1.01306
0.35458	36.4736	42.4151	37.7047				4.54357	4.16099	4.13368		1.2112	3.44294	1.01326
0.355	36.7907	42.7907	37.2951				4.5291	4.10937	4.16983		1.21182	3.42515	1.01359
0.35542	36.5946	42.8455	37.0216				4.54856	4.12355	4.12763		1.21257	3.40897	1.01304
0.35583	36.57	42.8062	37.0634				4.52858	4.14388	4.16485		1.21346	3.38679	1.01292
0.35625	36.8657	44.794	37.3068				4.55388	4.14937	4.17495		1.21522	3.3726	1.01329
0.35667	36.6914	43.3461	37.0506				4.55196	4.11905	4.10227		1.21673	3.36553	1.01399
0.35708	36.7751	43.2623	37.5082				4.53231	4.12208	4.16675		1.21827	3.35636	1.01432
0.3575	36.685	43.4217	37.4541				4.56051	4.14245	4.15331		1.21757	3.35023	1.01471
0.35792	36.7121	42.9332	37.8968				4.55959	4.07533	4.16491		1.21718	3.32784	1.01461
0.35833	36.9177	42.7482	37.6287				4.54499	4.09435	4.11461		1.21621	3.30844	1.01513
0.35875	36.7381	42.7019	37.6024				4.55653	4.13399	4.20065		1.21491	3.29339	1.01532
0.35917	36.7094	42.8602	37.7623				4.54545	4.14072	4.17597		1.21487	3.28854	1.01569
0.35958	36.811	42.8817	37.4888				4.52881	4.14113	4.17735		1.21515	3.27839	1.01602
0.36	36.9933	43.0498	37.767				4.54641	4.16145	4.20319		1.21616	3.2615	1.0164
0.36042	36.9215	43.6253	37.7384				4.51391	4.16278	4.20837		1.21722	3.23176	1.01608
0.36083	37.0795	43.1268	37.8077				4.54212	4.1633	4.12562		1.21767	3.19553	1.01552
0.36125	36.9075	43.5969	37.6216				4.52294	4.14141	4.14812		1.21845	3.15403	1.01513
0.36167	36.9509	44.0166	37.5351				4.53953	4.10755	4.18657		1.21882	3.11819	1.01517
0.36208	36.835	43.6194	37.9409				4.54139	4.11225	4.23321		1.22006	3.09026	1.01536
0.3625	36.8492	43.554	37.6745				4.54137	4.15712	4.17467		1.22168	3.07037	1.01556
0.36292	37.1639	43.5972	37.8167				4.54794	4.14514	4.20569		1.22382	3.05092	1.01566
0.36333	37.1361	43.6817	37.8107				4.51936	4.09816	4.13624		1.22615	3.03696	1.01586
0.36375	37.0716	43.8825	37.5551				4.49055	4.10053	4.16782		1.22732	3.01415	1.01598
0.36417	37.2646	43.6579	37.174				4.52047	4.12117	4.14013		1.2273	3.00347	1.01559
0.36458	37.3204	44.0825	37.1056				4.51526	4.12511	4.15205		1.22738	2.99573	1.01521
0.365	37.2595	43.6174	36.923				4.5078	4.09264	4.18689		1.22641	2.99173	1.01501
0.36542	37.2807	43.7187	37.1699				4.49579	4.09769	4.18272		1.22558	2.97597	1.01527
0.36583	37.3397	43.8027	37.137				4.53285	4.09134	4.15181		1.22465	2.95381	1.01543
0.36625	37.2205	44.107	37.0733				4.53351	4.15463	4.10376		1.22444	2.92809	1.0154
0.36667	37.2242	43.3112	37.2247				4.52128	4.15986	4.13618		1.2246	2.90929	1.01511
0.36708	37.3591	43.5564	37.1666				4.53967	4.17781	4.1108		1.22431	2.90337	1.01548
0.3675	37.3658	44.2003	37.0577				4.508	4.14288	4.19879		1.22348	2.88819	1.01561
0.36792	37.4243	44.6517	36.689				4.49965	4.1305	4.14419		1.22375	2.86911	1.01602
0.36833	37.552	43.7778	37.1476				4.51681	4.16295	4.14043		1.2243	2.8445	1.01625
0.36875	37.6336	44.2619	37.0633				4.48914	4.12569	4.18092		1.22515	2.82441	1.01628
0.36917	37.4687	43.7794	36.814				4.49272	4.19959	4.15377		1.22538	2.80024	1.01649
0.36958	37.6355	44.3166	37.2048				4.49339	4.17248	4.15275		1.22653	2.78599	1.01636
0.37	37.633	44.2957	37.1133				4.52199	4.18993	4.07205		1.22766	2.78034	1.01637
0.37042	37.8157	43.9459	37.6839				4.51254	4.14028	4.13457		1.22875	2.77219	1.0165
0.37083	37.8711	44.3109	37.701				4.50896	4.121	4.14869		1.22951	2.7627	1.01694
0.37125	38.0232	44.279	37.7898				4.49652	4.16518	4.16614		1.23133	2.74204	1.01766
0.37167	37.9811	44.1999	38.0207				4.50279	4.14978	4.12868		1.23301	2.71017	1.01803
0.37208	37.8601	44.5851	37.7772				4.48946	4.13423	4.08886		1.23479	2.6832	1.01849
0.3725	38.1443	44.7891	37.7368				4.49007	4.09027	4.11455		1.23531	2.65811	1.01847
0.37292	37.9367	44.4282	37.7357				4.49442	4.12973	4.11697		1.23504	2.64933	1.01869
0.37333	38.068	44.8565	37.8212				4.50382	4.14165	4.14538		1.23594	2.64262	1.01902
0.37375	38.0237	44.4528	37.7048				4.49523	4.10785	4.17688		1.23714	2.64719	1.01924
0.37417	38.0713	45.2708	37.5817				4.51832	4.1051	4.19485		1.23781	2.65118	1.02001
0.37458	38.1656	44.8117	37.7789				4.51999	4.12975	4.16722		1.23803	2.64687	1.02059
0.375	38.2373	44.5249	37.9263				4.51601	4.12533	4.1378		1.23884	2.64011	1.02035
0.37542	38.4456	44.606	37.6774				4.48772	4.1268	4.13807		1.23957	2.63242	1.02035
0.37583	38.3123	44.4033	37.5866				4.49928	4.15137	4.16072		1.23875	2.62724	1.02097
0.37625	38.3433	44.8355	37.718				4.49979	4.11695	4.1326		1.23935	2.62705	1.02123
0.37667	38.3757	44.7506	37.871				4.50075	4.15963	4.11141		1.23891	2.62373	1.0213
0.37708	38.3615	45.273	37.8117				4.51023	4.17496	4.10541		1.23875	2.62154	1.02163
0.3775	38.3533	45.5042	37.6101					4.31888	4.1655		1.2395	2.62428	1.02201
0.37792	38.4066	45.2283	38.1419						4.29323		1.23978	2.62391	1.02279
0.37833	38.3677	45.2654	38.4495				5.09005	4.90856	4.35117		1.24048	2.62208	1.02382
0.37875	38.6613	45.1964	38.2053				4.99125	4.70142			1.24204	2.60751	1.02447
0.37917	38.5578	45.1455	38.3418				5.0967	4.61408	4.39715		1.24363	2.59965	1.02553
0.37958	38.5847	45.1354	38.321				5.10236	4.61782	4.32418		1.24447	2.59816	1.027
0.38	38.6865	45.2545	38.4252				4.98338		4.31968		1.24367	2.59099	1.02759
0.38042	38.6842	45.1551	38.7957				4.99907		4.34054		1.24429	2.58843	1.02791
0.38083	38.6471	45.1331	38.4704				5.06901	5.68883			1.24371	2.57984	1.02833
0.38125	38.8261	45.0103	38.0353				4.95405	5.7268	4.28621		1.24361	2.57465	1.02863
0.38167	38.8197	45.0186	37.7223				4.81295	5.54109	3.92634		1.24406	2.56949	1.02859
0.38208	38.9209	45.3268	38.2954				4.84675	5.41855	3.85997		1.24592	2.54563	1.02952
0.3825	38.7807	44.9801	38.6957				4.81112	5.39325	3.80548		1.24786	2.50618	1.03023
0.38292	38.8233	44.807	38.5165				4.84904	5.37016	3.77988		1.24926	2.47685	1.03091
0.38333	38.7547	44.5454	37.8966				4.8457	5.29634	3.74774		1.25003	2.4575	1.03124
0.38375	38.8266	45.0338	37.8689				4.75654	5.31895	3.73314		1.24913	2.44861	1.0317
0.38417	38.8375	45.4412	37.9091				4.80184	5.28842	3.7056		1.24836	2.44155	1.03244
0.38458	38.9509	45.1249	37.6096				4.77703	5.31943	3.69885		1.24943	2.43854	1.03311
0.385	38.897	45.1212	37.6029				4.75613	5.31099	3.68197		1.25014	2.4294	1.03349
0.38542	39.0735	45.3623	37.5027				4.70451	5.33028	3.66238		1.25244	2.42709	1.03469
0.38583	39.0315	45.2486	37.6982				4.75035	5.29344	3.66556		1.25502	2.4278	1.03518
0.38625	38.9556	45.2986	37.5222				4.72452	5.32751	3.65471		1.25674	2.42903	1.03662
0.38667	39.1445	45.467	37.354				4.73034	5.32648	3.66037		1.25787	2.43785	1.03693
0.38708	39.0211	45.2795	37.6283				4.68166	5.30744	3.64706		1.25705	2.45576	1.03698
0.3875	38.9594	45.3096	37.536				4.67976	5.2909	3.63157		1.25702	2.45406	1.03734
0.38792	39.1577	45.6133	37.6954				4.70076	5.29051	3.62996		1.25688	2.44983	1.03799
0.38833	39.141	45.4945	37.8752				4.78082	5.3023	3.63097		1.25787	2.43935	1.03828
0.38875	39.1969	45.3223	37.8168				4.76598	5.33378	3.64149		1.25929	2.42967	1.03862
0.38917	39.2415	45.4304	37.7566				4.71091	5.33015	3.6318		1.25965	2.41564	1.0398
0.38958	39.2944	45.5361	37.7796				4.69546	5.32273	3.63476		1.2599	2.40561	1.0404
0.39	39.2862	47.2548	37.913				4.70734	5.2695	3.64097		1.25825	2.39645	1.04015
0.39042	39.2147	45.8087	38.03				4.66029	5.19423	3.62266		1.25719	2.38941	1.04037
0.39083	39.551	45.2304	37.8936				4.55489	5.12779	3.61008		1.25626	2.38102	1.04004
0.39125	39.4799	45.4858	37.7553				4.56656	5.11881	3.60477		1.25423	2.36115	1.03989
0.39167	39.4867	45.3375	38.1624				4.57923	5.11995	3.6149		1.25471	2.33606	1.0408
0.39208	39.4529	45.759	38.1101				4.51706	5.15276	3.62236		1.25402	2.32222	1.04113
0.3925	39.3989	45.6906	38.0338				4.52746	5.12386	3.61983		1.25401	2.3162	1.0417
0.39292	39.4072	45.9523	38.0495				4.53111	5.10828	3.62454		1.25436	2.3178	1.0428
0.39333	39.4145	46.0829	38.1282				4.58426	5.08823	3.61627		1.25479	2.33376	1.04361
0.39375	39.4131	45.8003	38.1914				4.55809	5.10688	3.63196		1.2555	2.36503	1.04389
0.39417	39.2652	45.361	38.4477				4.61615	5.0992	3.63292		1.25563	2.38954	1.04393
0.39458	39.4662	45.8633	38.3754				4.58938	5.09024	3.61833		1.2558	2.40404	1.0437
0.395	39.5929	45.9644	37.9403				4.5427	5.11481	3.63141		1.2564	2.41815	1.04379
0.39542	39.662	46.0687	38.3985				4.54663	5.0928	3.63441		1.25679	2.44173	1.04428
0.39583	39.6395	46.1391	38.4232				4.57018	5.1113	3.64467		1.2569	2.47516	1.04509
0.39625	39.8224	46.3918	38.5096				4.61066	5.12482	3.65864		1.25623	2.50475	1.04521
0.39667	39.7554	45.9823	38.3077				4.60476	5.09145	3.64962		1.25708	2.53137	1.0457
0.39708	39.6621	45.6239	38.1186				4.59411	5.10635	3.6612		1.25797	2.55314	1.04571
0.3975	39.8198	45.9336	38.1443				4.56228	5.10158	3.668		1.25765	2.56182	1.04512
0.39792	39.6997	46.5242	38.3926				4.57229	5.12498	3.67494		1.25698	2.55672	1.04428
0.39833	39.8143	46.2929	38.447				4.62072	5.12106	3.6725		1.25763	2.54449	1.04339
0.39875	39.8192	46.1652	38.4692				4.60489	5.08252	3.67889		1.25851	2.53052	1.04344
0.39917	40.0835	46.1223	38.6183				4.62424	5.09298	3.66752		1.25888	2.51818	1.04383
0.39958	39.9079	46.5064	38.49				4.60969	5.09709	3.68198		1.25866	2.5041	1.04444
0.4	39.9728	46.5153	38.5501				4.61142	5.09222	3.69063		1.25849	2.49343	1.04457
0.40042	40.0541	46.3472	38.6425				4.61548	5.07758	3.68287		1.25862	2.50142	1.04409
0.40083	40.1074	46.67	38.7602				4.63791	5.08441	3.6838		1.25972	2.52555	1.04322
0.40125	40.0737	48.3244	38.629				4.62199	5.10403	3.68145		1.25912	2.55096	1.04242
0.40167	40.2251	46.3889	38.7308				4.61366	5.16103	3.69509		1.25844	2.57466	1.04202
0.40208	40.2916	46.5092	38.5683				4.61526	5.09713	3.70162		1.25926	2.59765	1.04134
0.4025	40.3806	46.4865	38.7241				4.61177	5.06358	3.70349		1.26016	2.60407	1.04106
0.40292	40.2918	46.9686	38.7216				4.63598	5.08815	3.70526		1.26055	2.60065	1.041
0.40333	40.3949	46.7663	38.6996				4.61894	5.11718	3.71818		1.26102	2.5939	1.04042
0.40375	40.3873	46.9231	38.9111				4.64286	5.0952	3.71837		1.262	2.58758	1.03951
0.40417	40.3184	46.7667	39.1494				4.64638	5.0769	3.72664		1.26319	2.58208	1.03879
0.40458	40.4717	47.287	38.9351				4.63262	5.11198	3.7406		1.26449	2.56779	1.03809
0.405	40.5669	47.0153	38.9079				4.66587	5.09916	3.74931		1.26557	2.53475	1.03753
0.40542	40.6419	47.1101	38.9205				4.66781	5.08639	3.742		1.26623	2.49001	1.03776
0.40583	40.5663	47.1316	38.7388				4.64835	5.07333	3.74131		1.26673	2.434	1.0383
0.40625	40.5754	47.088	38.7934				4.67884	5.05849	3.74415		1.26638	2.38166	1.03856
0.40667	40.6576	47.1511	38.8793				4.70157	5.0959	3.75956		1.26605	2.32981	1.03781
0.40708	40.7632	47.4492	38.9195				4.68571	5.12291	3.75353		1.26623	2.29235	1.03781
0.4075	40.9296	47.4139	39.071				4.70589	5.12393	3.76458		1.2665	2.26693	1.03798
0.40792	40.7554	47.0956	38.7646				4.69661	5.07158	3.7585		1.26651	2.256	1.03814
0.40833	40.7784	47.5488	38.9446				4.64478	5.10412	3.77187		1.26703	2.25617	1.0389
0.40875	40.9361	47.4201	39.0286				4.67169	5.08645	3.76567		1.26677	2.25814	1.03905
0.40917	40.86	47.593	38.9687				4.65876	5.06176	3.77637		1.26615	2.23763	1.039
0.40958	40.8919	47.3553	38.7957				4.66149	5.10019	3.77307		1.26567	2.21043	1.03964
0.41	40.9682	47.3941	38.922				4.7156	5.09701	3.79003		1.26597	2.1909	1.04069
0.41042	40.9346	47.4561	38.7313				4.66534	5.04301	3.78298		1.26728	2.1829	1.04054
0.41083	41.042	47.3294	38.8698				4.69191	5.0221	3.79513		1.26984	2.17239	1.04104
0.41125	41.1082	47.1377	39.0675				4.70858	5.09278	3.79681		1.27099	2.16437	1.04263
0.41167	41.178	47.4055	39.012				4.70405	5.08355	3.77661		1.27107	2.16368	1.04379
0.41208	41.1777	47.9595	38.9106				4.6516	5.0918	3.78269		1.27049	2.16262	1.04379
0.4125	41.3594	47.7405	39.1069				4.69527	5.0795	3.79421		1.27057	2.15707	1.04334
0.41292	41.3272	47.4703	38.9681				4.7156	5.10575	3.80967		1.27039	2.13659	1.04323
0.41333	41.3745	47.9712	38.9776				4.6819	5.08039	3.80866		1.27009	2.09651	1.04372
0.41375	41.3012	48.5827	39.1877				4.75324	5.0668	3.81288		1.27065	2.06947	1.04482
0.41417	41.2486	47.966	39.0592				4.68513	5.09013	3.80945		1.27199	2.03889	1.04533
0.41458	41.484	47.5221	38.9332				4.69941	5.06939	3.80928		1.27292	2.00596	1.04474
0.415	41.4938	48.4512	39.0855				4.6644	5.05352	3.81822		1.27251	1.96921	1.0451
0.41542	41.4027	48.2327	39.1464				4.70235	5.05306	3.82485		1.27121	1.92866	1.04537
0.41583	41.4811	48.3477	39.1595				4.74737	5.04947	3.81251		1.27123	1.88036	1.04524
0.41625	41.3998	47.998	38.9937				4.67773	5.04038	3.81714		1.27258	1.82458	1.04524
0.41667	41.5538	47.8129	38.8571				4.68705	5.02414	3.82249		1.2735	1.77591	1.04599
0.41708	41.6744	48.151	38.7613				4.67092	5.04871	3.83039		1.27285	1.73841	1.0479
0.4175	41.7281	48.493	39.421				4.64599	5.03539	3.82214		1.27239	1.69325	1.04875
0.41792	41.7436	48.2813	39.1531				4.64883	5.04563	3.83534		1.27316	1.66358	1.04903
0.41833	41.7714	48.3586	39.3107				4.64307	5.08236	3.83021		1.27477	1.64635	1.04841
0.41875	41.8412	48.3224	39.563				4.64557	5.02802	3.83408		1.2758	1.65001	1.04816
0.41917	41.9273	48.4651	39.3497				4.64397	4.98686	3.84316		1.2751	1.64822	1.04858
0.41958	41.8727	49.1778	39.4488				4.65226	5.06855	3.8359		1.2755	1.64319	1.04868
0.42	41.8446	48.9463	39.3773				4.64717	5.03247	3.84718		1.27546	1.65472	1.04905
0.42042	42.056	48.8473	39.4098				4.67953	5.0011	3.84418		1.2744	1.67902	1.04956
0.42083	42.1928	48.4901	39.6732				4.59568	5.0163	3.84845		1.27342	1.6925	1.04896
0.42125	42.0179	48.7363	39.4753				4.63955	5.00379	3.84712		1.27274	1.69056	1.04877
0.42167	42.1667	48.8966	39.4641				4.68622	5.00363	3.85576		1.27332	1.68061	1.04888
0.42208	42.0275	49.181	39.5725				4.63894	5.00826	3.83914		1.27444	1.69235	1.04939
0.4225	42.2512	51.9882	39.6422				4.63075	5.00736	3.84617		1.2755	1.71193	1.05006
0.42292	42.3294	49.557	39.7126				4.63713	5.02007	3.84591		1.27481	1.71643	1.05064
0.42333	42.3518	49.1874	39.6855				4.66077	4.9892	3.85752		1.27356	1.70427	1.05094
0.42375	42.3583	49.159	39.4843				4.63693	5.05078	3.86554		1.27382	1.68309	1.05033
0.42417	42.5645	48.8243	39.6454				4.67518	5.01171	3.85493		1.27322	1.6523	1.05001
0.42458	42.5393	49.0936	39.6333				4.6533	5.00544	3.8558		1.27216	1.60686	1.04939
0.425	42.5269	49.1594	39.6268				4.62956	4.97091	3.86114		1.27393	1.57822	1.04938
0.42542	42.5487	49.1684	39.6808				4.63519	4.97722	3.86005		1.27545	1.57945	1.04987
0.42583	42.6069	49.7305	39.6206				4.67963	5.00506	3.86252		1.27586	1.59778	1.0494
0.42625	42.5775	49.3259	39.8686				4.63333	4.98244	3.86617		1.27676	1.62117	1.04795
0.42667	42.6506	50.2261	39.9144				4.6317	4.92175	3.86569		1.27678	1.64299	1.04751
0.42708	42.7569	49.8131	39.8224				4.62543	4.94271	3.86082		1.27651	1.6729	1.04696
0.4275	42.7729	49.5376	39.9774				4.65035	4.97944	3.87236		1.27705	1.70582	1.04757
0.42792	42.8255	49.2842	39.9091				4.60541	4.98922	3.87371		1.27803	1.72967	1.04815
0.42833	42.9072	49.4705	39.9748				4.59914	5.00085	3.87601		1.27821	1.75465	1.04944
0.42875	42.8273	49.6247	40.1058				4.63429	4.96707	3.87572		1.27901	1.79561	1.05045
0.42917	42.9573	49.6523	40.1611				4.61966	4.99735	3.87721		1.28127	1.84552	1.05081
0.42958	42.9707	49.8515	40.2261				4.63997	4.96556	3.89008		1.28206	1.87625	1.05013
0.43	43.0597	49.9098	40.003				4.63387	4.93585	3.88563		1.28109	1.88114	1.05024
0.43042	43.027	50.1656	39.8097				4.6739	4.95994	3.89016		1.28191	1.88132	1.05084
0.43083	43.2393	49.8642	40.0373				4.63863	4.98834	3.88327		1.282	1.87408	1.05215
0.43125	43.4053	50.0441	40.184				4.66638	4.96278	3.87955		1.28182	1.86336	1.05234
0.43167	43.4077	50.2651	40.2029				4.58262	4.94374	3.88809		1.28106	1.83461	1.05289
0.43208	43.4228	49.8996	40.3727				4.58092	4.94613	3.88545		1.28019	1.80544	1.05333
0.4325	43.4252	49.9873	40.3253				4.64257	4.9819	3.88644		1.28011	1.78537	1.05314
0.43292	43.3352	50.4594	40.385				4.62454	4.93653	3.88318		1.27974	1.77284	1.05195
0.43333	43.4567	50.9779	40.5869				4.63752	4.95275	3.88512		1.27895	1.75151	1.05146
0.43375	43.6092	50.7148	40.6267				4.65247	4.91972	3.90084		1.27923	1.72543	1.05128
0.43417	43.6057	50.2936	40.3379				4.64214	4.95258	3.89028		1.27919	1.70743	1.05218
0.43458	43.5032	50.0868	40.5228				4.66116	4.89813	3.89195		1.27948	1.69197	1.05168
0.435	43.6167	50.6014	40.3959				4.63539	4.94467	3.88917		1.28002	1.66957	1.05241
0.43542	43.6294	50.6419	40.5371				4.65194	4.91466	3.89221		1.28003	1.63368	1.05239
0.43583	43.7888	50.4465	40.4716				4.64938	4.90916	3.89659		1.27894	1.59252	1.05271
0.43625	43.7781	50.413	40.327				4.66603	4.93859	3.90269		1.27972	1.56223	1.05269
0.43667	43.8646	50.9442	40.3098				4.71541	4.91032	3.90217		1.28033	1.5394	1.05192
0.43708	43.9809	51.2148	40.3136				4.64146	4.91633	3.90467		1.28069	1.51998	1.05156
0.4375	43.9591	51.1449	40.577				4.64118	4.89285	3.89104		1.28084	1.50343	1.05137
0.43792	43.9098	51.1345	40.5161				4.67197	4.9218	3.90486		1.28121	1.4883	1.05156
0.43833	44.117	50.8722	40.5064				4.65388	4.90004	3.90331		1.2802	1.4737	1.05186
0.43875	44.2093	51.4674	40.4929				4.65035	4.91377	3.91549		1.27954	1.45257	1.05088
0.43917	44.1955	51.7062	40.6226				4.6829	4.91812	3.89473		1.28182	1.44798	1.05134
0.43958	44.3232	51.1817	40.5965				4.65307	4.89306	3.90006		1.28339	1.45196	1.05109
0.44	44.2592	51.4077	40.5839				4.67093	4.86683	3.91203		1.28414	1.47107	1.05065
0.44042	44.3648	53.3668	40.6943				4.6516	4.87642	3.91249		1.28489	1.48197	1.05053
0.44083	44.4685	52.0403	40.6251				4.61326	4.90094	3.90004		1.28426	1.47847	1.0506
0.44125	44.5639	51.6827	40.577				4.61685	4.8719	3.90864		1.28525	1.47565	1.05063
0.44167	44.4174	52.5366	40.6517				4.61013	4.86992	3.90748		1.2861	1.47185	1.05032
0.44208	44.6397	52.1545	40.5015				4.63322	4.90041	3.90506		1.28703	1.47	1.05036
0.4425	44.6091	51.9357	40.6649				4.62463	4.8842	3.90435		1.28874	1.47582	1.04962
0.44292	44.6838	51.856	40.8371				4.64849	4.92093	3.90661		1.29018	1.49375	1.049
0.44333	44.8541	51.921	40.7157				4.61421	4.88799	3.91203		1.29071	1.5229	1.04906
0.44375	44.7469	51.5007	40.7616				4.61206	4.91096	3.92089		1.28896	1.54381	1.04869
0.44417	44.886	51.9361	40.7425				4.60955	4.88015	3.91411		1.28767	1.54562	1.04813
0.44458	44.8855	51.9584	40.7504				4.5791	4.87601	3.90788		1.28771	1.53891	1.04845
0.445	44.8065	52.2147	40.8805				4.5791	4.87793	3.9193		1.28971	1.56312	1.04793
0.44542	44.9568	51.9329	40.8151				4.63652	4.87728	3.90652		1.29097	1.60001	1.04702
0.44583	45.0685	52.1857	40.8471				4.58193	4.83626	3.908		1.29019	1.6331	1.04653
0.44625	45.093	52.2621	41.1608				4.57519	4.82964	3.9107		1.29013	1.67711	1.04623
0.44667	45.1705	52.2678	41.3641				4.57992	4.85273	3.9103		1.2917	1.72784	1.04606
0.44708	45.1871	52.1136	41.0797				4.56048	4.83921	3.90522		1.29229	1.76988	1.04602
0.4475	45.2979	52.0086	41.4827				4.5585	4.87005	3.91668		1.29218	1.79684	1.04605
0.44792	45.2494	52.2075	41.3114				4.56135	4.84816	3.90748		1.29342	1.81426	1.04592
0.44833	45.3012	52.1918	41.0889				4.57801	4.8593	3.90437		1.29379	1.82006	1.04573
0.44875	45.4134	52.4962	41.1929				4.58264	4.84667	3.90496		1.29394	1.83274	1.04566
0.44917	45.3603	52.8303	41.1637				4.57099	4.85105	3.90591		1.29386	1.85177	1.04472
0.44958	45.2165	53.7714	41.1841				4.56277	4.86058	3.90688		1.29335	1.8543	1.04422
0.45	45.3604	53.919	41.2242				4.54497	4.81897	3.91319		1.29341	1.84935	1.04446
0.45042	45.472	53.9982	41.2032				4.55813	4.86807	3.91173		1.29454	1.85066	1.04478
0.45083	45.3222	53.379	41.4332				4.58097	4.86601	3.90628		1.29561	1.85174	1.04479
0.45125	45.3326	53.2371	41.3943				4.55844	4.84815	3.91253		1.29525	1.84895	1.04563
0.45167	45.5756	53.1771	41.4915				4.57885	4.82918	3.91402		1.29535	1.8563	1.04584
0.45208	45.6978	53.0056	41.5613				4.56925	4.83616	3.90562		1.29588	1.88044	1.04545
0.4525	45.8082	53.1372	41.4306				4.5614	4.80586	3.90475		1.29552	1.91633	1.04628
0.45292	45.7824	53.052	41.7719				4.543	4.80548	3.90859		1.29581	1.96632	1.04721
0.45333	45.9869	53.0673	41.494				4.51963	4.82281	3.91466		1.29538	2.00479	1.04816
0.45375	45.8947	53.5987	41.7272				4.54283	4.8171	3.92071		1.2949	2.03087	1.04919
0.45417	45.91	53.5911	41.8569				4.50929	4.80951	3.91025		1.29511	2.05443	1.04949
0.45458	46.0784	53.5376	41.4673				4.49698	4.81334	3.91005		1.29597	2.09402	1.04974
0.455	46.0735	53.8332	41.4106				4.54528	4.81669	3.91507		1.2956	2.14101	1.05024
0.45542	46.1534	53.4364	41.5576				4.52478	4.81441	3.91567		1.29343	2.17742	1.05185
0.45583	46.1095	53.3996	41.5923				4.53905	4.81919	3.91742		1.292	2.19854	1.05212
0.45625	46.2233	53.5503	41.8453				4.54934	4.79619	3.92791		1.29192	2.20975	1.05298
0.45667	46.3512	53.5397	41.7636				4.52048	4.79644	3.91936		1.29169	2.2044	1.05392
0.45708	46.4054	53.724	41.8418				4.52219	4.80037	3.92542		1.29202	2.18078	1.05349
0.4575	46.4928	53.7818	42.0867				4.5557	4.80797	3.92543		1.29258	2.14596	1.0533
0.45792	46.5505	53.51	41.8822				4.58038	4.80864	3.93243		1.29259	2.12756	1.05313
0.45833	46.6391	54.3053	41.8263				4.52664	4.78615	3.93124		1.29299	2.12112	1.05315
0.45875	46.5859	54.7002	41.9741				4.51839	4.76998	3.93209		1.29371	2.12412	1.05369
0.45917	46.5799	54.2171	41.9765				4.52725	4.78671	3.93229		1.29373	2.10729	1.0541
0.45958	46.7419	54.3137	42.1803				4.54363	4.81321	3.93113		1.29331	2.06311	1.05383
0.46	46.7304	53.9079	42.1338				4.55991	4.81874	3.93502		1.29371	2.01714	1.05313
0.46042	46.7713	54.2107	42.0408				4.55032	4.77786	3.93325		1.29351	1.9887	1.05297
0.46083	46.8934	54.4111	42.1376				4.52697	4.74614	3.92898		1.29315	1.96714	1.05332
0.46125	47.0527	54.2878	42.1929				4.58041	4.7747	3.94571		1.29364	1.95003	1.05462
0.46167	47.0895	54.3519	42.4272				4.52707	4.77429	3.93758		1.29362	1.94549	1.0559
0.46208	47.0984	54.2976	42.379				4.52798	4.77998	3.93273		1.2939	1.94328	1.05608
0.4625	47.1593	54.6605	42.2889				4.52028	4.74726	3.94454		1.29461	1.93523	1.05567
0.46292	47.2163	54.5915	42.4798				4.52433	4.78317	3.94		1.29555	1.91961	1.0555
0.46333	47.2804	55.1089	42.4731				4.53437	4.78488	3.94063		1.29502	1.87522	1.05542
0.46375	47.2325	55.0688	42.3283				4.51571	4.75496	3.92515		1.29463	1.83087	1.05531
0.46417	47.37	55.2078	42.556				4.55288	4.77546	3.94472		1.29556	1.81134	1.05564
0.46458	47.3696	54.9991	42.3981				4.55068	4.76376	3.93014		1.29801	1.79863	1.05575
0.465	47.5745	54.9391	42.6328				4.5445	4.73958	3.94715		1.29986	1.78117	1.05648
0.46542	47.3794	54.976	42.6372				4.54812	4.79125	3.92543		1.29945	1.77177	1.05645
0.46583	47.6689	54.996	42.5598				4.56475	4.77294	3.93515		1.29855	1.77225	1.0556
0.46625	47.7015	55.2241	42.7905				4.53644	4.76932	3.93318		1.29833	1.76564	1.05492
0.46667	47.781	55.5542	42.5076				4.52874	4.79367	3.93075		1.29883	1.75218	1.05428
0.46708	47.8544	55.2809	42.5749				4.54206	4.74278	3.94444		1.29922	1.74979	1.05431
0.4675	47.9263	55.6858	42.5962				4.52419	4.73073	3.93551		1.29929	1.75554	1.05373
0.46792	47.9826	55.6182	42.522				4.50905	4.71086	3.93454		1.29961	1.78514	1.05388
0.46833	47.7903	55.6765	42.7696				4.51997	4.72564	3.9454		1.299	1.80832	1.05458
0.46875	47.9437	55.9107	42.7577				4.54417	4.72724	3.94205		1.29806	1.80982	1.05517
0.46917	48.1162	55.9418	42.6175				4.50741	4.72404	3.94076		1.29639	1.80904	1.05578
0.46958	48.095	56.0624	42.8569				4.50683	4.72584	3.94274		1.29579	1.79896	1.05535
0.47	48.3181	55.85	42.8961				4.5074	4.69777	3.94642		1.29546	1.76821	1.05478
0.47042	48.275	55.7029	42.8376				4.52077	4.71454	3.94153		1.29552	1.71834	1.05438
0.47083	48.4307	56.1372	42.8267				4.52089	4.70851	3.94199		1.29506	1.67877	1.0545
0.47125	48.4472	56.191	42.8244				4.53345	4.71095	3.94202		1.29382	1.66123	1.05497
0.47167	48.3144	55.8358	42.9156				4.5182	4.6966	3.94141		1.29293	1.62672	1.05512
0.47208	48.5466	56.0331	42.8815				4.49832	4.70601	3.93858		1.29294	1.58971	1.05594
0.4725	48.5632	56.1261	43.1436				4.50578	4.70186	3.93656		1.29283	1.5585	1.05597
0.47292	48.705	56.3166	43.2796				4.50994	4.70793	3.93573		1.29315	1.5384	1.05534
0.47333	48.7174	56.5848	43.1128				4.52438	4.7117	3.95013		1.29352	1.51649	1.05432
0.47375	48.8156	56.7533	43.4508				4.50324	4.67935	3.94485		1.29427	1.4898	1.05355
0.47417	48.883	56.4836	43.139				4.52103	4.69637	3.94032		1.29495	1.47835	1.05313
0.47458	48.8933	56.6204	43.1234				4.51989	4.70983	3.92766		1.29575	1.47875	1.05254
0.475	48.9571	56.7769	43.4084				4.49501	4.70179	3.93738		1.29634	1.47428	1.052
0.47542	49.0315	56.8466	43.4516				4.5165	4.67791	3.94069		1.29687	1.45854	1.0516
0.47583	49.0354	56.9369	43.3215				4.47349	4.68449	3.95349		1.29759	1.44227	1.0516
0.47625	49.1156	56.8897	43.4087				4.46451	4.68795	3.94185		1.2994	1.45145	1.05179
0.47667	49.2309	57.1149	43.4081				4.4971	4.67124	3.9378		1.29941	1.46169	1.0515
0.47708	49.3912	57.5403	43.4931				4.48677	4.6525	3.94086		1.2987	1.454	1.05146
0.4775	49.2746	57.2187	43.5231				4.50464	4.70285	3.93825		1.29853	1.43268	1.05138
0.47792	49.2964	57.468	43.5166				4.50186	4.67201	3.94487		1.29839	1.42746	1.05174
0.47833	49.3932	57.6083	43.6334				4.4881	4.68395	3.93982		1.29796	1.45066	1.0514
0.47875	49.565	57.5856	43.586				4.47931	4.67302	3.92986		1.29744	1.46558	1.05143
0.47917	49.5799	57.5162	43.554				4.45432	4.67738	3.92724		1.29837	1.46892	1.05197
0.47958	49.4926	57.7484	43.6835				4.474	4.67522	3.93606		1.29941	1.50425	1.0522
0.48	49.6128	58.0035	43.7954				4.43471	4.70042	3.93809		1.30064	1.56349	1.05213
0.48042	49.7327	57.8761	43.6438				4.44923	4.67972	3.94867		1.30059	1.60307	1.0516
0.48083	49.7637	58.0784	43.4525				4.41695	4.66116	3.93743		1.29954	1.62375	1.0509
0.48125	49.8256	58.2311	43.4974				4.42759	4.68205	3.92478		1.29904	1.63052	1.05036
0.48167	49.9663	57.9515	43.6886				4.45225	4.6509	3.94558		1.30055	1.62774	1.05016
0.48208	50.1492	57.7897	43.4626				4.43352	4.66119	3.9305		1.30265	1.63726	1.04968
0.4825	50.163	58.1724	43.7752				4.46225	4.64605	3.93621		1.3043	1.65238	1.04895
0.48292	50.1274	58.5767	44.153				4.44082	4.67742	3.93246		1.30482	1.65849	1.04867
0.48333	50.1523	58.5266	43.9967				4.46295	4.66659	3.94474		1.3063	1.67059	1.04848
0.48375	50.2435	58.2732	43.9149				4.45367	4.65559	3.9425		1.30705	1.68619	1.04824
0.48417	50.3596	58.2132	44.1341				4.47652	4.65851	3.93707		1.30693	1.68766	1.04852
0.48458	50.4791	58.4924	44.2379				4.43816	4.61493	3.94221		1.30685	1.66321	1.04894
0.485	50.451	58.5493	44.3544				4.45229	4.59456	3.92892		1.30766	1.63738	1.04972
0.48542	50.4117	58.7765	44.1758				4.44094	4.63654	3.93929		1.30846	1.60551	1.05034
0.48583	50.5208	59.0514	44.1952				4.41928	4.64802	3.92744		1.30975	1.59245	1.05083
0.48625	50.4154	58.9586	44.3712				4.43248	4.63381	3.94091		1.31034	1.60522	1.05061
0.48667	50.632	58.9603	44.3083				4.42456	4.6184	3.93721		1.31087	1.61641	1.05221
0.48708	50.7237	58.7943	44.445				4.42464	4.62315	3.93141		1.31191	1.61261	1.05392
0.4875	50.8563	58.7446	44.3944				4.42955	4.6238	3.93876		1.31245	1.60429	1.05515
0.48792	50.7879	58.8607	44.368				4.44751	4.62835	3.94643		1.31216	1.61483	1.05574
0.48833	51.1067	59.2362	44.3558				4.44697	4.62699	3.93433		1.31344	1.61685	1.05597
0.48875	51.261	58.9837	44.3749				4.41225	4.61577	3.93522		1.3153	1.60185	1.05589
0.48917	51.2157	59.4016	44.5374				4.42873	4.62894	3.92339		1.31506	1.59531	1.05588
0.48958	51.378	59.5175	44.8208				4.41771	4.60634	3.93283		1.31403	1.60733	1.05587
0.49	51.2056	59.3452	44.6985				4.42703	4.60981	3.93259		1.31391	1.63643	1.05606
0.49042	51.3417	59.1495	44.6367				4.42731	4.61577	3.94375		1.31356	1.65783	1.05648
0.49083	51.199	59.6805	44.7842				4.41986	4.61866	3.93782		1.31326	1.66427	1.05717
0.49125	51.406	60.0244	44.762				4.43236	4.6055	3.93608		1.31274	1.67572	1.05624
0.49167	51.6137	59.5801	44.6069				4.41223	4.59447	3.93423		1.31142	1.67937	1.0555
0.49208	51.7722	60.2625	44.6846				4.37592	4.61084	3.93477		1.31072	1.67955	1.05533
0.4925	51.8679	60.3481	44.9667				4.39015	4.63131	3.93828		1.30983	1.67321	1.05507
0.49292	51.9892	59.6631	44.8745				4.40588	4.63477	3.94541		1.30733	1.67647	1.05528
0.49333	51.8167	59.9676	44.9272				4.38654	4.59982	3.93903		1.30558	1.69011	1.05524
0.49375	52.0607	59.8858	45.1051				4.40959	4.56119	3.95601		1.30543	1.71075	1.05509
0.49417	52.0229	60.1446	44.8781				4.39634	4.59494	3.93823		1.30626	1.70758	1.05499
0.49458	52.0937	60.38	45.1059				4.38636	4.58795	3.94708		1.30745	1.68833	1.05528
0.495	52.1295	60.5905	45.0167				4.38563	4.59927	3.96307		1.30873	1.66985	1.05534
0.49542	52.1784	60.9965	44.9415				4.40923	4.57818	3.95476		1.30918	1.65701	1.05506
0.49583	52.3609	60.8908	45.1				4.43269	4.61178	3.95132		1.30869	1.64549	1.05503
0.49625	52.2946	60.7153	45.1834				4.40139	4.60506	3.94963		1.30782	1.64507	1.05431
0.49667	52.4782	60.5757	45.264				4.40044	4.59428	3.94984		1.30715	1.63729	1.05422
0.49708	52.7004	61.2277	45.372				4.40555	4.59538	3.96386		1.30695	1.61801	1.05533
0.4975	52.7098	61.2034	45.5379				4.40466	4.55638	3.95996		1.30712	1.61612	1.05567
0.49792	52.6139	67.0514	45.5693				4.39229	4.58858	3.95246		1.30728	1.61809	1.0559
0.49833	52.8954	61.5568	45.5332				4.41602	4.58489	3.942		1.30785	1.59298	1.05606
0.49875	52.8946	61.6178	45.6665				4.40986	4.5928	3.95032		1.30871	1.57393	1.05646
0.49917	53.0523	61.5237	45.6815				4.38603	4.57483	3.95864		1.30865	1.57049	1.05635
0.49958	53.2426	61.3358	45.6557				4.40928	4.55398	3.96127		1.30768	1.58099	1.05677
0.5	53.0506	61.7239	45.7594				4.41343	4.55176	3.94775		1.30687	1.60258	1.05725
0.50042	53.0626	61.3743	45.7189				4.41104	4.56791	3.94174		1.30654	1.61624	1.05781
0.50083	53.2651	61.6519	45.6867				4.39754	4.56734	3.9572		1.30875	1.63822	1.05875
0.50125	53.3647	61.6301	45.9282				4.40903	4.55269	3.94816		1.311	1.66193	1.05918
0.50167	53.3224	61.7438	45.9509				4.42003	4.54738	3.94109		1.31138	1.66841	1.05894
0.50208	53.4358	62.4618	45.9736				4.42197	4.55524	3.95676		1.31185	1.66256	1.05943
0.5025	53.5016	61.9007	45.9297				4.42938	4.58036	3.95682		1.31166	1.6528	1.05989
0.50292	53.6258	61.7683	45.8655				4.41714	4.55866	3.95658		1.31034	1.65961	1.06043
0.50333	53.5794	61.7798	45.9798				4.43882	4.55123	3.95816		1.30961	1.67327	1.06011
0.50375	53.7886	62.3132	45.8533				4.41075	4.54771	3.95342		1.30914	1.67674	1.06005
0.50417	53.8599	61.9123	46.0603				4.41537	4.57456	3.95942		1.30951	1.67083	1.05927
0.50458	53.8272	62.1205	46.0042				4.45235	4.56168	3.96318		1.30869	1.64474	1.05903
0.505	54.0367	62.4435	45.9796				4.42521	4.55526	3.96858		1.30674	1.62231	1.05842
0.50542	54.0754	62.6929	46.3095				4.42459	4.55529	3.9604		1.3047	1.59513	1.05734
0.50583	54.0897	62.8538	46.1579				4.42574	4.55816	3.95106		1.30442	1.58077	1.05683
0.50625	54.172	62.5971	46.2435				4.41528	4.56161	3.96027		1.30509	1.59326	1.05646
0.50667	54.1682	62.6745	46.2582				4.41143	4.5222	3.94844		1.30468	1.60912	1.05556
0.50708	54.2375	62.8692	46.256				4.41952	4.52566	3.96628		1.30486	1.62554	1.05477
0.5075	54.3454	62.9997	46.299				4.41162	4.535	3.9608		1.30532	1.64294	1.05389
0.50792	54.4379	63.1816	46.3659				4.41258	4.54227	3.97083		1.30432	1.66408	1.05354
0.50833	54.4486	63.6842	46.4253				4.41451	4.4994	3.96342		1.30397	1.68885	1.053
0.50875	54.6441	63.0358	46.6645				4.42321	4.5232	3.96086		1.30436	1.70994	1.05317
0.50917	54.6664	62.7135	46.414				4.42462	4.51354	3.95831		1.30627	1.73933	1.05326
0.50958	54.8041	63.2291	46.443				4.39623	4.49597	3.96073		1.30889	1.76012	1.05312
0.51	54.6817	63.4691	46.4734				4.40759	4.50684	3.96006		1.31026	1.76753	1.05318
0.51042	54.8712	63.8519	46.5571				4.41851	4.51175	3.97026		1.30938	1.78326	1.05238
0.51083	54.9454	63.5479	46.8371				4.39035	4.53389	3.9643		1.30946	1.7872	1.05172
0.51125	55.0459	64.3871	46.8383				4.38778	4.52529	3.94455		1.31077	1.7842	1.05139
0.51167	55.0376	64.1708	46.8631				4.39516	4.5233	3.95187		1.31135	1.78498	1.05123
0.51208	55.0678	64.4069	46.9034				4.38101	4.52412	3.96071		1.31264	1.79125	1.05116
0.5125	55.2272	64.2086	46.6167				4.37655	4.51216	3.96045		1.31353	1.79514	1.05103
0.51292	55.2508	64.2184	46.7802				4.37679	4.50987	3.95043		1.31279	1.79377	1.05048
0.51333	55.2158	64.2758	46.8674				4.38331	4.49264	3.95394		1.31289	1.79259	1.04974
0.51375	55.5115	64.537	46.7467				4.37003	4.48916	3.96042		1.31301	1.79298	1.049
0.51417	55.5964	64.564	47.1811				4.35445	4.5095	3.95427		1.31297	1.81261	1.04868
0.51458	55.5639	64.9309	47.2981				4.34268	4.49453	3.9499		1.31316	1.83489	1.04887
0.515	55.7259	64.796	47.2585				4.36181	4.48895	3.94393		1.31366	1.81054	1.04958
0.51542	55.7899	64.6323	47.2486				4.3514	4.48149	3.96828		1.31419	1.79224	1.04974
0.51583	55.8716	64.5773	47.2799				4.35538	4.5073	3.96158		1.31466	1.80175	1.04933
0.51625	56.1284	64.8205	47.3267				4.35652	4.51719	3.95768		1.31412	1.81233	1.04862
0.51667	56.1762	64.7272	47.2313				4.35545	4.49136	3.96199		1.31323	1.81408	1.04858
0.51708	56.092	64.9842	47.0929				4.36357	4.49803	3.95827		1.31343	1.80198	1.04888
0.5175	56.1464	64.8028	47.0705				4.34461	4.48763	3.9656		1.31452	1.78832	1.04936
0.51792	56.4229	65.0256	47.246				4.33182	4.49467	3.95841		1.3135	1.77622	1.04951
0.51833	56.3621	65.3344	47.4664				4.34441	4.47709	3.96208		1.31199	1.75935	1.04967
0.51875	56.4949	65.1048	47.484				4.32525	4.50108	3.95259		1.31164	1.73927	1.05003
0.51917	56.5308	65.3905	47.3348				4.32633	4.48982	3.95847		1.31073	1.73523	1.05054
0.51958	56.6174	65.5058	47.456				4.34906	4.45389	3.96722		1.31053	1.73721	1.0507
0.52	56.6505	65.9987	47.5203				4.33226	4.50188	3.95714		1.31034	1.72067	1.05133
0.52042	56.7329	66.0271	47.5686				4.31218	4.48668	3.95391		1.30865	1.6734	1.05189
0.52083	56.7861	68.7561	47.5022				4.33294	4.49199	3.95517		1.30813	1.63518	1.05281
0.52125	56.9035	65.963	47.7441				4.34977	4.46539	3.95163		1.30807	1.60045	1.05328
0.52167	56.922	66.3561	47.9657				4.32028	4.46352	3.95583		1.30814	1.56932	1.05354
0.52208	57.0591	66.6171	47.9134				4.30961	4.46653	3.95696		1.30787	1.54941	1.05425
0.5225	57.1449	66.2882	47.79				4.33385	4.47122	3.94839		1.30825	1.54894	1.05541
0.52292	57.016	66.3138	47.9477				4.30884	4.48658	3.96519		1.30939	1.5463	1.0561
0.52333	57.1924	66.2332	47.8274				4.32381	4.49136	3.96826		1.31003	1.52934	1.05709
0.52375	57.3349	66.698	48.1241				4.31943	4.50749	3.96604		1.31108	1.50396	1.05705
0.52417	57.482	66.7945	48.1065				4.31424	4.47801	3.96868		1.3126	1.49935	1.05672
0.52458	57.5619	66.8672	47.8665				4.28344	4.47903	3.95769		1.31325	1.50432	1.05639
0.525	57.6154	66.6994	47.916				4.30484	4.44466	3.97136		1.31396	1.52067	1.05662
0.52542	57.6738	67.1992	48.0793				4.31466	4.43434	3.95637		1.31431	1.5361	1.05686
0.52583	57.716	67.3281	48.3978				4.30343	4.44586	3.94931		1.31476	1.56677	1.05657
0.52625	57.8575	67.1607	48.476				4.32125	4.45755	3.9598		1.31502	1.61231	1.0566
0.52667	57.9352	66.7382	48.2884				4.31093	4.47503	3.9586		1.31525	1.62498	1.05666
0.52708	57.9566	67.0548	48.4197				4.28985	4.48174	3.94558		1.31609	1.60517	1.0564
0.5275	58.1001	67.0336	48.5153				4.30365	4.44537	3.96998		1.31686	1.60874	1.05609
0.52792	58.3693	67.6688	48.5664				4.31978	4.46993	3.9624		1.31728	1.64566	1.05504
0.52833	58.2184	67.1484	48.8424				4.31034	4.47662	3.97303		1.3175	1.6943	1.05487
0.52875	58.4623	68.0574	48.7452				4.33085	4.48469	3.95267		1.31595	1.72957	1.05517
0.52917	58.4537	67.9865	48.7768				4.30085	4.46135	3.9608		1.31477	1.75742	1.05537
0.52958	58.6012	67.9652	48.765				4.30062	4.46728	3.94234		1.31487	1.75319	1.05507
0.53	58.7246	68.0716	48.7712				4.30423	4.46714	3.94595		1.31632	1.70667	1.0549
0.53042	58.7112	67.8781	48.8113				4.32113	4.44861	3.94808		1.31843	1.63001	1.0555
0.53083	58.6612	68.4045	48.9203				4.30423	4.44768	3.95106		1.31905	1.55028	1.05556
0.53125	58.8114	68.5892	49.0975				4.32047	4.44915	3.95197		1.31859	1.49625	1.0554
0.53167	59.0681	68.7101	49.1614				4.29467	4.44849	3.9633		1.31854	1.45173	1.05525
0.53208	59.0916	71.406	49.4957				4.29096	4.44	3.95854		1.31897	1.38485	1.05525
0.5325	59.1814	69.5837	49.4931				4.2856	4.44075	3.94999		1.31929	1.29243	1.05515
0.53292	59.1322	69.0503	49.4528				4.29401	4.44545	3.95254		1.31889	1.18967	1.05543
0.53333	59.3387	68.7315	49.3512				4.31186	4.44182	3.95079		1.31864	1.0954	1.05551
0.53375	59.3557	69.3962	49.4711				4.29168	4.44919	3.95119		1.31893	1.00645	1.05493
0.53417	59.2943	69.417	49.3768				4.29707	4.41832	3.96142		1.3192	0.941614	1.05412
0.53458	59.4587	69.0408	49.5243				4.29491	4.41941	3.95173		1.31799	0.902302	1.05339
0.535	59.4562	69.4037	49.5059				4.27824	4.42467	3.95994		1.31546	0.875271	1.05263
0.53542	59.6997	69.4273	49.6791				4.32312	4.42507	3.95229		1.31444	0.846966	1.05201
0.53583	59.6822	69.4937	49.5998				4.31738	4.44707	3.95777		1.31453	0.820027	1.05164
0.53625	59.9945	69.5028	49.8338				4.31015	4.42281	3.95238		1.3134	0.795754	1.05041
0.53667	60.0118	69.9283	49.9788				4.31555	4.42134	3.94938		1.31076	0.776139	1.04979
0.53708	60.2985	69.7752	49.9034				4.29488	4.41566	3.95832		1.3084	0.757513	1.05044
0.5375	60.2341	69.9801	49.969				4.29737	4.41078	3.94304		1.30741	0.741178	1.05037
0.53792	60.2938	69.5546	50.0787				4.33984	4.40468	3.95224		1.30771	0.72789	1.05005
0.53833	60.5355	70.2903	50.1708				4.31345	4.4258	3.95636		1.30676	0.717654	1.04962
0.53875	60.3115	70.4959	50.1743				4.28982	4.40444	3.95571		1.30567	0.710606	1.05016
0.53917	60.4917	70.387	50.1853				4.33826	4.37335	3.95021		1.30521	0.705652	1.05054
0.53958	60.6722	70.1082	50.3311				4.31331	4.43034	3.94771		1.30574	0.70144	1.05018
0.54	60.7378	70.534	50.5811				4.30503	4.41903	3.94057		1.30609	0.697312	1.05007
0.54042	60.7484	70.2549	50.3585				4.30001	4.38315	3.94077		1.30654	0.693838	1.04984
0.54083	61.0667	70.4505	50.3948				4.30951	4.38498	3.94943		1.30654	0.690818	1.05073
0.54125	61.1955	70.7235	50.5067				4.32563	4.37424	3.95622		1.30718	0.688106	1.05059
0.54167	61.1911	70.956	50.6572				4.34523	4.39487	3.94379		1.30932	0.685638	1.04965
0.54208	61.1352	70.5395	50.6632				4.31258	4.41601	3.94756		1.31169	0.683684	1.04882
0.5425	61.2713	71.0437	50.7491				4.31099	4.42449	3.94683		1.31249	0.681876	1.04859
0.54292	61.3469	71.7824	50.7766				4.32929	4.38469	3.95735		1.31403	0.680097	1.04876
0.54333	61.3823	72.7782	50.7372				4.30441	4.38783	3.95188		1.31541	0.678541	1.04823
0.54375	61.4258	71.3719	50.6805				4.29125	4.40664	3.94834		1.31613	0.677158	1.04804
0.54417	61.488	71.5996	50.8503				4.2951	4.38878	3.94827		1.31577	0.67639	1.04873
0.54458	61.5632	71.4745	50.9653				4.29274	4.38389	3.95607		1.31542	0.676285	1.04893
0.545	61.88	72.0891	50.9866				4.29888	4.38961	3.94581		1.31619	0.675946	1.04904
0.54542	62.0733	71.9326	50.9545				4.28138	4.394	3.93356		1.31802	0.675427	1.04869
0.54583	62.0178	71.9876	51.1073				4.31688	4.37826	3.93951		1.31862	0.674788	1.04934
0.54625	62.1221	71.9365	51.3078				4.31686	4.37957	3.95882		1.31729	0.674202	1.05059
0.54667	62.2283	72.0364	51.2291				4.29169	4.38331	3.9456		1.3158	0.673323	1.05137
0.54708	62.078	71.9695	51.2373				4.28928	4.38379	3.94452		1.31535	0.672706	1.0522
0.5475	62.1876	72.7218	51.3168				4.3054	4.38476	3.94944		1.31425	0.672362	1.05299
0.54792	62.4954	72.5765	51.3182				4.28626	4.36089	3.95663		1.31391	0.672032	1.05405
0.54833	62.3685	72.3589	51.3678				4.29072	4.38434	3.96011		1.31543	0.671932	1.05477
0.54875	62.5423	72.7452	51.4993				4.30137	4.38217	3.95571		1.31716	0.671595	1.05471
0.54917	62.704	72.7704	51.5967				4.27742	4.37045	3.94002		1.31844	0.670892	1.05449
0.54958	62.6472	72.5827	51.7705				4.29017	4.38206	3.94149		1.31795	0.670699	1.05436
0.55	62.76	72.714	51.6482				4.28513	4.373	3.9477		1.31727	0.670776	1.05542
0.55042	63.0464	72.8114	51.6209				4.27254	4.39745	3.94551		1.31906	0.670857	1.05581
0.55083	62.9806	73.214	51.7966				4.30685	4.38252	3.94655		1.32111	0.670573	1.05551
0.55125	63.0747	73.2881	51.7883				4.27215	4.37524	3.94026		1.32194	0.670338	1.05598
0.55167	63.1197	73.2513	51.984				4.27226	4.36964	3.93285		1.32261	0.669978	1.05508
0.55208	63.2391	73.5222	51.8881				4.27678	4.37377	3.93066		1.32391	0.669564	1.05443
0.5525	63.1187	73.9962	52.0679				4.27768	4.37632	3.93181		1.32429	0.669213	1.05456
0.55292	63.2896	73.748	52.2756				4.28448	4.36625	3.93262		1.3236	0.668434	1.05485
0.55333	63.4057	73.6518	52.37				4.26264	4.38614	3.9392		1.32345	0.667662	1.05518
0.55375	63.676	74.0334	52.2694				4.27341	4.34451	3.93297		1.32317	0.667406	1.05619
0.55417	63.7785	73.8732	52.237				4.24913	4.35053	3.9247		1.32294	0.667187	1.05681
0.55458	63.7394	73.8337	52.255				4.27168	4.35228	3.92366		1.32217	0.667337	1.05607
0.555	63.824	74.2889	52.3606				4.25624	4.33818	3.93947		1.32044	0.667693	1.05538
0.55542	64.0433	74.6082	52.2409				4.23177	4.33953	3.93157		1.31922	0.66811	1.05474
0.55583	64.0597	76.4657	52.3341				4.24461	4.32862	3.92156		1.31894	0.668856	1.05393
0.55625	64.0937	74.9565	52.4357				4.25051	4.3544	3.92419		1.31904	0.669442	1.05416
0.55667	64.4048	75.0073	52.5853				4.25816	4.37144	3.92942		1.31886	0.670305	1.05434
0.55708	64.4653	74.9883	52.5882				4.24811	4.36188	3.941		1.31851	0.671258	1.05391
0.5575	64.7189	74.8822	52.5445				4.22302	4.34276	3.9305		1.31904	0.672043	1.05319
0.55792	64.461	74.953	52.4841				4.25861	4.34415	3.92187		1.31875	0.672631	1.05269
0.55833	64.5311	74.9356	52.5831				4.24476	4.33545	3.92285		1.31813	0.673243	1.05188
0.55875	64.5539	75.2433	52.6204				4.20979	4.32175	3.93491		1.31843	0.673697	1.05149
0.55917	64.8144	75.6853	52.6801				4.22176	4.34623	3.92498		1.31867	0.673954	1.05173
0.55958	64.9785	75.8256	52.5806				4.23927	4.35477	3.93037		1.31945	0.673634	1.05214
0.56	64.9387	75.7706	52.7467				4.20528	4.34522	3.92131		1.32065	0.673238	1.05212
0.56042	64.8889	75.5344	52.8691				4.2284	4.31531	3.92324		1.32124	0.673102	1.05223
0.56083	65.1641	75.7772	52.8406				4.22762	4.32468	3.91698		1.32153	0.673631	1.05199
0.56125	65.3149	75.6888	52.9544				4.20895	4.34105	3.92423		1.32162	0.674157	1.05193
0.56167	65.4429	76.4135	52.9021				4.21605	4.34951	3.92438		1.32191	0.674341	1.05233
0.56208	65.4444	76.1346	53.106				4.2189	4.35207	3.93381		1.32166	0.674755	1.05292
0.5625	65.4499	76.3446	53.1524				4.23931	4.32537	3.92667		1.32206	0.675313	1.05303
0.56292	65.6497	76.8319	53.2423				4.23589	4.33018	3.92334		1.32323	0.675687	1.05313
0.56333	65.7377	76.6311	53.4003				4.22232	4.34965	3.93448		1.3233	0.676201	1.05259
0.56375	65.7494	76.4921	53.5505				4.22247	4.34333	3.92259		1.32401	0.676676	1.05233
0.56417	65.8097	76.5532	53.5433				4.20844	4.32363	3.9069		1.32467	0.67772	1.05232
0.56458	65.9338	77.2826	53.6058				4.20524	4.32727	3.9073		1.32427	0.679358	1.05259
0.565	66.0787	77.2438	53.6586				4.21216	4.32383	3.91218		1.32218	0.680445	1.0529
0.56542	66.1908	77.3665	53.6175				4.22354	4.33917	3.90701		1.32009	0.680994	1.05314
0.56583	66.3185	77.2616	53.7222				4.20924	4.36419	3.9071		1.31911	0.681605	1.05297
0.56625	66.4829	77.1863	53.8956				4.19549	4.33105	3.90998		1.31859	0.682694	1.05192
0.56667	66.5233	77.2501	53.815				4.18747	4.29039	3.91209		1.3175	0.683968	1.05123
0.56708	66.8415	77.5967	53.8446				4.20373	4.31168	3.90694		1.31567	0.685089	1.05042
0.5675	66.5968	77.6643	53.9004				4.20001	4.32984	3.89825		1.31499	0.685919	1.04972
0.56792	66.7783	77.8183	53.9312				4.20452	4.3414	3.9112		1.31632	0.686601	1.04966
0.56833	66.824	77.6339	54.2213				4.21459	4.33496	3.91045		1.31658	0.68737	1.04942
0.56875	67.0295	77.8367	54.0976				4.2029	4.32719	3.90305		1.31545	0.688053	1.04878
0.56917	67.1291	77.9228	54.1895				4.21274	4.31842	3.90395		1.31411	0.688205	1.04823
0.56958	67.307	78.5191	54.2517				4.20934	4.31763	3.9023		1.31451	0.688523	1.04734
0.57	67.372	78.635	54.4532				4.2022	4.32999	3.89971		1.31595	0.689118	1.0469
0.57042	67.331	78.6841	54.375				4.18867	4.30562	3.9084		1.31681	0.68927	1.0469
0.57083	67.5498	78.6529	54.3821				4.1807	4.30369	3.90392		1.31842	0.689165	1.04709
0.57125	67.7816	78.9566	54.4537				4.21092	4.30504	3.89976		1.31982	0.688984	1.04699
0.57167	67.5967	78.859	54.5608				4.19847	4.30668	3.90295		1.32178	0.689083	1.04762
0.57208	67.6682	79.2036	54.6486				4.19265	4.32064	3.89987		1.32297	0.68974	1.04783
0.5725	67.862	79.0433	54.6891				4.21318	4.31627	3.90496		1.32201	0.690622	1.04742
0.57292	68.0752	78.9508	54.817				4.20161	4.30686	3.89919		1.32178	0.691512	1.04716
0.57333	67.9461	79.4673	55.054				4.22793	4.29764	3.90076		1.32317	0.692322	1.0474
0.57375	68.1712	79.6075	54.9452				4.21617	4.30162	3.90679		1.32471	0.693576	1.04762
0.57417	68.3242	79.6619	55.0803				4.20263	4.30792	3.91615		1.32654	0.694847	1.04799
0.57458	68.3167	79.7926	55.1179				4.20665	4.3219	3.91453		1.32603	0.695472	1.04754
0.575	68.7218	79.8929	55.2054				4.22454	4.33359	3.90892		1.32476	0.696005	1.04679
0.57542	68.6332	79.8028	55.2164				4.21357	4.3248	3.90409		1.32373	0.696746	1.04676
0.57583	68.7082	79.8221	55.247				4.209	4.31589	3.89802		1.32277	0.697812	1.04721
0.57625	68.9982	80.4469	55.337				4.20878	4.32269	3.90589		1.32155	0.699085	1.04678
0.57667	68.857	80.5152	55.5513				4.20711	4.32039	3.90667		1.31946	0.700302	1.04613
0.57708	68.918	80.7911	55.6756				4.2186	4.32076	3.90924		1.31876	0.701322	1.04623
0.5775	69.0902	80.6999	55.6539				4.19193	4.29727	3.90595		1.31834	0.702141	1.04622
0.57792	69.2259	80.654	55.5656				4.20948	4.27822	3.91788		1.31656	0.703028	1.04602
0.57833	69.3041	81.0938	55.7913				4.20588	4.29704	3.92516		1.31513	0.703927	1.0455
0.57875	69.576	81.177	55.7932				4.19914	4.30697	3.91357		1.31323	0.704851	1.04479
0.57917	69.5287	81.2877	55.8497				4.20217	4.28881	3.91165		1.31372	0.706133	1.04532
0.57958	69.4186	81.4822	56.008				4.19272	4.28756	3.91888		1.31574	0.707641	1.04643
0.58	69.6223	81.2875	56.0041				4.1974	4.28338	3.92129		1.31588	0.709093	1.04713
0.58042	69.8979	81.5319	55.8035				4.21295	4.2954	3.91717		1.3159	0.710369	1.04708
0.58083	70.1296	82.7228	55.7067				4.20692	4.31076	3.93207		1.31651	0.711173	1.04692
0.58125	70.0473	82.2692	55.7349				4.20789	4.32115	3.92379		1.31726	0.712117	1.04751
0.58167	70.1978	82.4472	55.9006				4.22517	4.29789	3.92203		1.3173	0.712978	1.04763
0.58208	70.1561	82.2844	55.8724				4.20411	4.29537	3.924		1.31688	0.713634	1.04757
0.5825	70.3792	82.3461	56.0479				4.19376	4.30793	3.92977		1.31654	0.714474	1.04732
0.58292	70.5339	82.3385	56.1251				4.21667	4.31216	3.93102		1.31654	0.715184	1.0477
0.58333	70.7349	82.7194	56.1565				4.21231	4.27727	3.91955		1.31692	0.715355	1.04837
0.58375	70.9528	82.8658	56.2946				4.21571	4.28098	3.92312		1.31656	0.71589	1.04849
0.58417	70.9932	83.0748	56.3282				4.20681	4.29144	3.92261		1.31613	0.716953	1.04827
0.58458	70.6954	82.5815	56.3429				4.20517	4.29019	3.92208		1.31661	0.717834	1.04812
0.585	70.9964	82.7622	56.36				4.21287	4.29182	3.91981		1.31651	0.718249	1.04806
0.58542	70.9812	82.7129	56.3995				4.21369	4.28398	3.92079		1.31711	0.718608	1.04836
0.58583	71.2689	84.3229	56.3714				4.20992	4.27378	3.91653		1.31735	0.718366	1.04842
0.58625	71.1338	83.5549	56.4457				4.19399	4.26706	3.91435		1.31762	0.718289	1.0488
0.58667	71.1857	83.8902	56.6252				4.20987	4.28985	3.92817		1.31845	0.718733	1.04951
0.58708	71.5391	83.5386	56.7447				4.21186	4.28254	3.9282		1.31878	0.718862	1.05051
0.5875	71.7278	85.3883	56.7899				4.20157	4.29447	3.92277		1.31861	0.718653	1.05156
0.58792	71.6746	84.4038	56.9104				4.21236	4.26605	3.9274		1.31829	0.718946	1.05278
0.58833	71.8002	84.4036	56.9326				4.23437	4.292	3.93199		1.31814	0.719237	1.05357
0.58875	71.8119	84.1679	57.0084				4.20472	4.29931	3.92525		1.31713	0.719633	1.05457
0.58917	72.1202	83.9891	57.1967				4.22939	4.26349	3.92827		1.31624	0.720238	1.0555
0.58958	72.1152	86.3996	57.4149				4.22688	4.28574	3.92815		1.31645	0.720682	1.05598
0.59	72.2524	84.8245	57.673				4.20378	4.27031	3.91811		1.31511	0.721305	1.05681
0.59042	72.3421	84.8238	57.755				4.20696	4.27815	3.92369		1.31469	0.722477	1.0573
0.59083	72.5651	84.5913	57.7486				4.19854	4.27799	3.93196		1.31475	0.723395	1.05761
0.59125	72.7882	84.9037	57.8617				4.2034	4.26066	3.92441		1.31405	0.724171	1.05764
0.59167	72.8171	85.0847	57.8984				4.20252	4.27563	3.91567		1.31475	0.725371	1.05685
0.59208	72.7891	85.1759	58.0066				4.18503	4.26822	3.91813		1.31603	0.726451	1.05597
0.5925	73.0773	85.2087	58.0874				4.21049	4.2852	3.91724		1.31757	0.726998	1.05542
0.59292	73.011	85.2111	58.1011				4.18041	4.27961	3.93014		1.31821	0.727328	1.05516
0.59333	73.1255	88.2564	58.2824				4.18239	4.2641	3.93048		1.31914	0.726935	1.05463
0.59375	73.2061	86.0337	58.1581				4.18093	4.26785	3.93125		1.31961	0.726363	1.0538
0.59417	73.2848	86.0648	58.3053				4.16641	4.27862	3.92847		1.31867	0.726553	1.05343
0.59458	73.3733	86.1671	58.3673				4.17308	4.2589	3.91087		1.3185	0.726999	1.05305
0.595	73.4848	86.2589	58.2496				4.17135	4.26973	3.91009		1.31912	0.727126	1.05343
0.59542	73.7217	86.2562	58.2965				4.14417	4.27756	3.92666		1.3193	0.727334	1.05376
0.59583	73.8517	86.4658	58.4821				4.17302	4.25592	3.92293		1.31931	0.727542	1.054
0.59625	73.8842	86.3238	58.4891				4.1575	4.25349	3.93157		1.31897	0.727538	1.05377
0.59667	74.0443	86.5221	58.6296				4.18152	4.25184	3.92466		1.31857	0.728552	1.05335
0.59708	74.1	86.8656	58.6059				4.17812	4.26712	3.92288		1.31851	0.729869	1.05305
0.5975	74.0601	87.0274	58.8153				4.17766	4.25785	3.92804		1.31863	0.730885	1.05292
0.59792	74.2134	86.6388	58.8371				4.14768	4.25046	3.92324		1.31801	0.732143	1.0529
0.59833	74.4513	87.1369	58.8424				4.15303	4.24846	3.92473		1.31705	0.733404	1.053
0.59875	74.4942	87.5141	58.8543				4.16348	4.26664	3.91658		1.31824	0.734421	1.05367
0.59917	74.5867	87.5403	59.0147				4.14962	4.23863	3.90917		1.3191	0.735288	1.05353
0.59958	74.539	87.2929	58.9924				4.15382	4.23389	3.9137		1.31827	0.735904	1.05279
0.6	74.7204	87.6071	58.9733				4.14168	4.25248	3.92576		1.31833	0.736827	1.05226
0.60042	74.7372	87.6672	59.1541				4.14448	4.24888	3.92655		1.31947	0.73784	1.05148
0.60083	75.0416	88.0557	59.3894				4.1489	4.25284	3.92607		1.32003	0.738803	1.05206
0.60125	75.2703	90.0184	59.2685				4.15429	4.25714	3.93068		1.31992	0.739289	1.05257
0.60167	75.4679	88.5923	59.2317				4.13492	4.26203	3.92262		1.31945	0.739753	1.05156
0.60208	75.3851	89.1818	59.3712				4.12794	4.2578	3.92058		1.32003	0.740126	1.05048
0.6025	75.4557	88.7377	59.4531				4.14371	4.25041	3.93153		1.32082	0.739866	1.04976
0.60292	75.5362	88.6051	59.6482				4.13871	4.23345	3.92509		1.32235	0.739569	1.04958
0.60333	75.7131	88.4542	59.6438				4.17683	4.27645	3.91954		1.32368	0.739524	1.0484
0.60375	75.7271	89.09	59.5947				4.15958	4.29001	3.9205		1.32476	0.739471	1.04761
0.60417	75.8163	88.9768	59.6708				4.15507	4.26176	3.92812		1.32589	0.739567	1.04682
0.60458	76.01	89.736	59.8012				4.14035	4.24494	3.93309		1.3261	0.739743	1.04582
0.605	76.181	89.5377	59.7745				4.14279	4.26318	3.9337		1.32597	0.740067	1.04593
0.60542	76.1173	89.5141	59.7252				4.13198	4.25429	3.93189		1.32583	0.740553	1.04585
0.60583	76.4256	90.4614	59.8477				4.14546	4.25126	3.92205		1.32623	0.74098	1.04486
0.60625	76.5625	89.4821	60.1454				4.11992	4.2826	3.92962		1.32608	0.741505	1.04495
0.60667	76.4901	89.9461	60.1365				4.13264	4.27025	3.92912		1.3251	0.742285	1.04521
0.60708	76.5471	89.826	60.1727				4.13404	4.26408	3.93186		1.32548	0.743512	1.04535
0.6075	76.7874	89.6412	60.3168				4.12718	4.24447	3.92083		1.32546	0.744739	1.04488
0.60792	76.7421	90.1952	60.2958				4.12882	4.27807	3.9266		1.32374	0.74586	1.04475
0.60833	76.8805	90.09	60.3077				4.11821	4.25971	3.92737		1.32189	0.746986	1.04499
0.60875	77.0798	90.4047	60.3138				4.14007	4.25827	3.92399		1.32071	0.748752	1.04555
0.60917	77.25	90.7268	60.4224				4.15015	4.24713	3.92814		1.32009	0.750191	1.04683
0.60958	77.3015	90.9517	60.5449				4.13264	4.26138	3.92343		1.32012	0.751543	1.04683
0.61	77.6427	90.9462	60.5115				4.11329	4.25194	3.93376		1.32025	0.753044	1.0467
0.61042	77.5685	90.9661	60.5415				4.13035	4.24477	3.93248		1.31954	0.754277	1.04778
0.61083	77.6597	91.3819	60.7068				4.14717	4.23925	3.93816		1.3192	0.755034	1.04814
0.61125	77.9042	91.6711	60.7097				4.11919	4.23023	3.93509		1.31944	0.755784	1.04845
0.61167	77.7283	91.6488	60.4914				4.13345	4.23116	3.9316		1.31817	0.756735	1.04804
0.61208	77.9626	91.6749	60.5823				4.11597	4.22325	3.93181		1.31836	0.757457	1.04742
0.6125	78.1625	91.8422	61.0111				4.14889	4.24017	3.93766		1.31924	0.758082	1.04744
0.61292	78.1746	91.787	60.8843				4.13695	4.24603	3.94457		1.32017	0.758873	1.04752
0.61333	78.2066	91.8748	60.8454				4.13436	4.24444	3.93759		1.32062	0.759129	1.04789
0.61375	78.2898	92.1121	60.9239				4.1469	4.25174	3.93351		1.32094	0.759216	1.04762
0.61417	78.5218	92.4517	61.1516				4.13598	4.23642	3.94298		1.31982	0.759241	1.04724
0.61458	78.7231	92.4188	61.3115				4.12768	4.24786	3.93503		1.31912	0.759329	1.04741
0.615	78.8507	92.7112	61.2006				4.1477	4.24889	3.93687		1.32045	0.760002	1.04808
0.61542	78.815	92.9361	61.1874				4.14562	4.22711	3.95015		1.32164	0.761229	1.04901
0.61583	79.0053	92.9433	61.3738				4.13078	4.24318	3.94718		1.32195	0.76244	1.04915
0.61625	79.1269	93.0411	61.2613				4.12596	4.26445	3.93969		1.32273	0.763665	1.04953
0.61667	79.2553	92.852	61.4469				4.14306	4.26058	3.9431		1.32196	0.765292	1.05028
0.61708	79.1696	93.2692	61.5838				4.12385	4.26736	3.93956		1.32111	0.766665	1.05118
0.6175	79.3597	93.7234	61.8395				4.14108	4.26327	3.94341		1.3205	0.767701	1.05236
0.61792	79.6798	94.0043	61.8334				4.11017	4.24475	3.93673		1.32048	0.768478	1.05279
0.61833	79.8202	93.5256	61.8047				4.1195	4.23591	3.94687		1.32009	0.769542	1.05296
0.61875	79.9383	93.4008	61.7467				4.1275	4.23485	3.94544		1.32081	0.770771	1.05411
0.61917	79.9628	93.7052	61.8805				4.14182	4.23023	3.95251		1.32188	0.771698	1.05402
0.61958	80.1152	94.2156	61.9922				4.13619	4.25266	3.94477		1.32153	0.772475	1.05296
0.62	80.4222	94.0874	62.0445				4.13307	4.23759	3.94666		1.32116	0.773513	1.05229
0.62042	80.2125	94.491	61.9953				4.13704	4.2482	3.94535		1.32101	0.774386	1.0525
0.62083	80.5119	94.7705	62.0663				4.14538	4.25636	3.94846		1.32099	0.775061	1.05245
0.62125	80.6048	94.7081	62.3519				4.12407	4.23935	3.95742		1.3219	0.775602	1.05233
0.62167	80.7552	95.2334	62.292				4.13485	4.26274	3.95596		1.32206	0.775987	1.05158
0.62208	80.7393	95.2788	62.3385				4.16497	4.2529	3.95997		1.32167	0.776683	1.05075
0.6225	81.0813	95.4258	62.3908				4.13463	4.25487	3.95939		1.32132	0.77801	1.05057
0.62292	81.1259	95.9453	62.3278				4.14742	4.22615	3.94371		1.32231	0.779433	1.05037
0.62333	81.1475	96.0135	62.5419				4.13775	4.25029	3.95209		1.32267	0.780472	1.04981
0.62375	81.4025	96.2725	62.5757				4.15534	4.2505	3.9533		1.32146	0.781327	1.04967
0.62417	81.2955	95.8639	62.6993				4.15187	4.22513	3.94924		1.32082	0.781446	1.04989
0.62458	81.5171	96.1867	62.7991				4.14546	4.23464	3.94595		1.31992	0.781309	1.0497
0.625	81.9913	96.1249	62.9961				4.15388	4.2631	3.96181		1.31962	0.781379	1.04954
0.62542	81.7806	96.5657	62.7523				4.17898	4.23681	3.95212		1.31911	0.781134	1.0492
0.62583	81.7906	96.6983	62.8639				4.16521	4.23976	3.95073		1.31737	0.781173	1.04846
0.62625	82.126	96.5005	62.9592				4.17975	4.23583	3.96112		1.31654	0.781839	1.0482
0.62667	82.0244	96.6767	62.9799				4.15493	4.21755	3.96167		1.31707	0.782113	1.04776
0.62708	82.2923	96.7438	62.8945				4.15351	4.22779	3.953		1.33367	0.91459	1.04791
0.6275	82.358	97.0082	63.0011				4.14802	4.2569	3.9548		1.36018	1.3638	1.04873
0.62792	82.434	98.666	63.1133				4.16396	4.23742	3.95516		1.37952	1.87283	1.04843
0.62833	82.66	97.3618	63.174				4.17412	4.23409	3.95897		1.38016	2.36602	1.04232
0.62875	82.6714	97.663	63.2479				4.16199	4.2226	3.96224		1.36514	2.8793	1.02847
0.62917	82.9547	97.4664	63.3393				4.15827	4.24878	3.95711		1.34475	3.02561	1.0097
0.62958	83.0765	97.8909	63.4924				4.1713	4.24351	3.96337		1.31877	2.9547	0.987576
0.63	83.2649	97.7246	63.6435				4.16928	4.24407	3.96464		1.28836	2.88408	0.964039
0.63042	83.1723	97.9195	63.6136				4.17408	4.23678	3.95716		1.2557	2.81313	0.93948
0.63083	83.2211	98.2517	63.6599				4.16562	4.23918	3.96224		1.22089	2.74179	0.913496
0.63125	83.4166	98.3842	63.699				4.16627	4.23334	3.95705		1.18407	2.68089	0.8865
0.63167	83.6349	98.4279	63.8945				4.16909	4.23052	3.96657		1.12938	2.56007	0.857883
0.63208	83.7124	98.1734	63.9114				4.15735	4.21976	3.96599		1.06192	2.26012	0.82816
0.6325	83.8284	98.0948	63.8441				4.16933	4.21351	3.96774		1.00088	4.06921	0.798723
0.63292	83.7929	98.7049	63.9295				4.16031	4.20464	3.97171		0.967801	5.51528	0.774942
0.63333	83.925	99.0791	64.0361				4.16119	4.19645	3.9573		0.953181	5.63626	0.758235
0.63375	84.0523	99.0626	64.0504				4.15034	4.21396	3.96051		0.940273	5.90556	0.746216
0.63417	84.256	99.3969	64.4329				4.14015	4.21889	3.96483		0.930301		0.736977
0.63458	84.2851	99.3113	64.4273				4.15621	4.2126	3.96506		0.923994		0.729304
0.635	84.44	99.5636	64.5326				4.14439	4.22327	3.96564		0.918936		0.7226
0.63542	84.5523	99.7494	64.5611				4.14538	4.21223	3.9625		0.914926		0.716706
0.63583	84.7678	99.8867	64.6575				4.14014	4.23162	3.95737		0.912137		0.71163
0.63625	84.7086	99.8133	64.635				4.13121	4.23616	3.96424		0.910318		0.707188
0.63667	84.914	100.33	64.8047				4.14228	4.21527	3.96179		0.909941		0.703344
0.63708	85.2121	100.055	64.7538				4.12623	4.23223	3.96156		0.91086		0.700133
0.6375	85.3098	100.162	64.8135				4.12126	4.23238	3.96445		0.903837	4.85675	0.69725
0.63792	85.1865	100.37	64.8816				4.11055	4.23153	3.9615		0.893938	4.53712	0.694744
0.63833	85.2467	100.416	65.0038				4.13988	4.22791	3.95845		0.887275	4.43869	0.692702
0.63875	85.4059	101.057	65.0586				4.11632	4.214	3.95396		0.881624	4.37559	0.690981
0.63917	85.4794	101.091	65.1176				4.10719	4.21997	3.96212		0.876613	4.37946	0.689575
0.63958	85.7679	101.091	65.2308				4.10662	4.23955	3.96054		0.873107	4.41073	0.688512
0.64	86.1353	101.554	65.2171				4.12822	4.23102	3.96413		0.870335	4.43922	0.68758
0.64042	85.9736	100.973	65.3995				4.10876	4.21978	3.96029		0.867475	4.46853	0.686576
0.64083	85.7695	101.537	65.5279				4.132	4.20149	3.9715		0.865554	4.49762	0.6855
0.64125	86.111	102.089	65.6167				4.13344	4.21987	3.96081		0.863589	4.51248	0.684314
0.64167	86.3281	101.693	65.4956				4.08621	4.20121	3.95759		0.860597	4.50249	0.683095
0.64208	86.3327	102.347	65.4774				4.0973	4.19918	3.95165		0.857885	4.47154	0.681935
0.6425	86.5866	102.023	65.5778				4.10823	4.22004	3.9537		0.855691	4.43099	0.680702
0.64292	86.6229	102.61	65.7462				4.11096	4.24058	3.96034		0.854711	4.38096	0.679377
0.64333	86.5852	102.25	65.6208				4.10238	4.22743	3.96309		0.855411	4.32207	0.678032
0.64375	86.5673	102.289	65.6351				4.12858	4.22684	3.95151		0.855785	4.23052	0.676876
0.64417	86.9223	103.648	65.8881				4.11307	4.21235	3.95702		0.855672	4.11559	0.675857
0.64458	87.07	103.403	65.953				4.09764	4.2094	3.963		0.855343	3.98826	0.674977
0.645	87.0627	103.398	66.0952				4.09872	4.21279	3.96183		0.855515	3.83966	0.674265
0.64542	87.2355	102.991	66.0415				4.1005	4.21109	3.95969		0.855165	3.70096	0.673776
0.64583	87.3297	103.307	66.1956				4.09042	4.22667	3.95719		0.854106	3.60716	0.67348
0.64625	87.3507	103.456	66.2074				4.10084	4.2127	3.96017		0.853487	3.54283	0.673391
0.64667	87.4041	103.398	66.3248				4.10204	4.22348	3.95523		0.85244	3.49227	0.67349
0.64708	87.6435	103.891	66.33				4.11016	4.23292	3.9546		0.851495	3.45174	0.67371
0.6475	87.7742	103.75	66.4289				4.09194	4.22392	3.95128		0.851727	3.42115	0.673913
0.64792	87.8966	103.86	66.6019				4.09104	4.22179	3.9553		0.851547	3.39711	0.673978
0.64833	88.0084	104.224	66.6145				4.08194	4.21044	3.95344		0.851093	3.37468	0.673772
0.64875	88.2054	104.062	66.7133				4.09499	4.22254	3.9653		0.851204	3.37884	0.673505
0.64917	88.2934	104.775	66.6285				4.07753	4.24956	3.95023		0.852248	3.4081	0.673129
0.64958	88.2805	104.856	66.9148				4.08143	4.24083	3.96575		0.853397	3.46452	0.672651
0.65	88.3172	104.685	66.9596				4.1164	4.22676	3.95668		0.854292	3.50351	0.672145
0.65042	88.4758	105.051	66.854				4.10327	4.2029	3.95452		0.855784	3.48332	0.671831
0.65083	88.6766	104.674	66.9935				4.11372	4.2247	3.96635		0.857185	3.43784	0.671528
0.65125	88.9426	105.238	66.9183				4.10578	4.22071	3.95876		0.858686	3.4168	0.671217
0.65167	88.9428	105.793	67.1513				4.10451	4.22012	3.96374		0.85927	3.43884	0.67094
0.65208	88.9176	105.433	67.3519				4.09492	4.21932	3.96765		0.857783	3.4792	0.670646
0.6525	88.9441	105.36	67.3261				4.0842	4.21899	3.95669		0.85575	3.50615	0.670508
0.65292	89.0838	105.86	67.4169				4.06508	4.21874	3.95169		0.854066	3.53935	0.670616
0.65333	89.4092	105.204	67.4781				4.07978	4.22475	3.96019		0.851492	3.59037	0.670818
0.65375	89.4349	106.091	67.5214				4.09765	4.215	3.96564		0.848511	3.63696	0.671125
0.65417	89.5594	106.039	67.7672				4.07586	4.22718	3.96912		0.845771	3.65239	0.671391
0.65458	89.6051	106.145	67.6119				4.08377	4.2243	3.96389		0.844453	3.65526	0.671529
0.655	89.8313	106.185	67.8974				4.09445	4.20518	3.95807		0.844272	3.65805	0.671514
0.65542	89.9864	106.533	67.8688				4.10907	4.21316	3.96332		0.845015	3.66628	0.671381
0.65583	90.0905	106.586	67.8041				4.09327	4.20414	3.97553		0.84744	3.67286	0.671048
0.65625	90.1259	106.97	67.9458				4.09845	4.20307	3.95967		0.850461	3.6488	0.670685
0.65667	90.3538	107.087	67.9752				4.10963	4.21287	3.96951		0.852995	3.59607	0.670407
0.65708	90.261	106.861	68.1745				4.1045	4.22156	3.96733		0.854944	3.55677	0.670217
0.6575	90.5388	107.277	68.1626				4.08688	4.22958	3.97776		0.857676	3.51551	0.670046
0.65792	90.5675	107.715	68.0871				4.1045	4.24142	3.97863		0.860976	3.43917	0.669867
0.65833	90.7345	107.797	68.2782				4.08767	4.23858	3.97684		0.863228	3.35338	0.669722
0.65875	90.7471	107.606	68.5056				4.08815	4.21825	3.98084		0.864347	3.28857	0.669669
0.65917	90.8442	107.758	68.3637				4.09217	4.2344	3.97813		0.864428	3.24512	0.669717
0.65958	90.9803	107.922	68.3824				4.1023	4.2625	3.96962		0.863283	3.23564	0.669752
0.66	91.1975	107.983	68.5756				4.10495	4.23225	3.97748		0.861337	3.24587	0.669749
0.66042	91.3541	108.57	68.635				4.08792	4.22624	3.97596		0.85817	3.26009	0.669912
0.66083	91.3205	108.377	68.8511				4.11833	4.19896	3.98207		0.854788	3.27691	0.670201
0.66125	91.6188	108.389	68.7708				4.12871	4.2238	3.98189		0.852047	3.30746	0.670498
0.66167	91.5614	108.566	68.791				4.12111	4.20926	3.98286		0.849638	3.33064	0.67066
0.66208	91.8384	108.697	69.0732				4.12279	4.21302	3.9788		0.846253	3.32875	0.670761
0.6625	91.9225	109.019	69.0473				4.11839	4.22824	3.97791		0.843088	3.33481	0.670815
0.66292	92.082	109.646	69.0973				4.12625	4.21089	3.98251		0.841075	3.35425	0.670864
0.66333	92.1036	109.044	69.068				4.12628	4.21386	3.98447		0.840304	3.35343	0.670876
0.66375	92.4278	109.231	69.128				4.13357	4.22889	3.97946		0.840199	3.3379	0.67074
0.66417	92.4035	109.786	69.3128				4.11732	4.20302	3.9835		0.841566	3.30333	0.670617
0.66458	92.474	109.725	69.2525				4.11193	4.23082	3.98249		0.844087	3.25009	0.670628
0.665	92.8214	109.585	69.3652				4.11944	4.22525	3.97946		0.846249	3.18119	0.67053
0.66542	92.75	109.637	69.3867				4.1246	4.20743	3.98627		0.848396	3.10831	0.670284
0.66583	92.8049	110.109	69.5235				4.10333	4.19442	3.99138		0.851215	3.021	0.670043
0.66625	93.1269	110.478	69.5874				4.115	4.20842	3.98223		0.85423	2.94592	0.669871
0.66667	93.2155	110.736	69.5481				4.11238	4.23999	3.98155		0.857573	2.9039	0.669791
0.66708	93.4978	110.905	69.7061				4.1201	4.25063	3.98741		0.861415	2.87128	0.669885
0.6675	93.3372	111.09	69.8407				4.12956	4.20245	3.99263		0.866316	2.84029	0.670037
0.66792	93.4369	110.512	69.8636				4.12828	4.21527	3.99247		0.870653	2.82942	0.670188
0.66833	93.7393	111.361	69.9205				4.12173	4.21124	3.98577		0.87387	2.82698	0.670362
0.66875	93.6437	111.573	69.9755				4.13097	4.21607	3.99162		0.875029	2.82962	0.670404
0.66917	93.9855	111.419	70.1046				4.1148	4.21517	3.99307		0.87471	2.84012	0.670364
0.66958	93.9869	111.883	70.1387				4.14232	4.19331	3.98913		0.874479	2.84732	0.670529
0.67	94.1506	111.607	70.2428				4.1123	4.19668	3.99379		0.875159	2.85585	0.670881
0.67042	94.315	111.851	70.0244				4.14411	4.18729	3.99367		0.874971	2.88077	0.671461
0.67083	94.5041	112.235	70.175				4.14071	4.20572	4.00199		0.873983	2.91195	0.672344
0.67125	94.6904	112.582	70.3396				4.13385	4.21459	3.99135		0.873747	2.94717	0.673358
0.67167	94.5014	112.254	70.3428				4.12734	4.20764	3.99		0.87362	2.96955	0.67427
0.67208	94.8221	112.286	70.3808				4.14033	4.20955	3.98573		0.873649	2.98424	0.675006
0.6725	94.6173	112.355	70.3992				4.12157	4.19973	3.99196		0.874052	2.99766	0.675662
0.67292	94.9528	112.596	70.3153				4.12742	4.21747	3.9944		0.874551	3.0051	0.67642
0.67333	95.0836	112.863	70.1825				4.13032	4.20905	3.987		0.876732	3.01001	0.677455
0.67375	95.1786	112.883	70.2301				4.12895	4.19009	3.99465		0.879426	3.00144	0.678501
0.67417	95.3676	112.927	70.3849				4.10842	4.20968	3.99271		0.881291	2.99315	0.679265
0.67458	95.4232	112.801	70.53				4.10993	4.18799	3.99047		0.881465	2.98951	0.679753
0.675	95.4655	113.022	70.4872				4.12688	4.1894	3.98273		0.881979	2.99035	0.679893
0.67542	95.7566	113.878	70.6273				4.13521	4.2076	3.99077		0.884052	2.98768	0.679652
0.67583	95.7499	113.603	70.637				4.14082	4.18281	3.98025		0.885172	2.97642	0.679102
0.67625	96.0156	113.792	70.7175				4.1236	4.18379	3.98412		0.885192	2.97667	0.678537
0.67667	95.9062	113.805	70.6645				4.09994	4.19145	3.99075		0.884348	2.94455	0.67809
0.67708	95.8805	115.243	70.6485				4.13037	4.18302	3.99694		0.88434	2.87111	0.677666
0.6775	96.2198	114.12	70.8034				4.12754	4.20563	3.99074		0.886428	2.7928	0.677247
0.67792	96.2156	113.948	70.905				4.09849	4.21098	3.98551		0.887756	2.72004	0.676587
0.67833	96.3766	114.152	70.8679				4.11803	4.1919	3.97917		0.888114	2.66441	0.675827
0.67875	96.6402	114.554	71.3366				4.11525	4.19201	3.98723		0.888424	2.61596	0.675142
0.67917	96.8396	115.037	71.2847				4.10536	4.20392	3.98961		0.889002	2.56143	0.674628
0.67958	96.8007	114.765	71.2412				4.10056	4.1965	3.99884		0.889493	2.5141	0.674267
0.68	96.8958	115.247	71.272				4.1047	4.2087	3.992		0.88976	2.48298	0.674015
0.68042	96.7831	114.937	71.3864				4.11108	4.20411	3.98331		0.891335	2.46267	0.673927
0.68083	96.9491	115.045	71.3905				4.11373	4.20337	3.98873		0.894442	2.4371	0.67372
0.68125	97.1498	115.214	71.4433				4.10825	4.18841	3.98801		0.89819	2.42962	0.673378
0.68167	97.3521	115.057	71.7028				4.1015	4.19197	3.99943		0.901103	2.4374	0.673181
0.68208	97.3969	115.505	71.7356				4.09161	4.20813	3.98723		0.901484	2.46472	0.673094
0.6825	97.5401	117.19	71.7393				4.07581	4.19311	3.98299		0.900881	2.51767	0.673145
0.68292	97.5818	115.86	71.7881				4.0945	4.19428	3.98469		0.900269	2.57919	0.673307
0.68333	97.6223	115.832	71.8301				4.10631	4.20855	3.98797		0.899862	2.63922	0.673627
0.68375	97.738	116.107	72.0148				4.08701	4.20327	3.99512		0.900243	2.69511	0.674782
0.68417	97.9233	115.885	72.0619				4.06951	4.18672	3.98284		0.901941	2.73347	0.677239
0.68458	98.2358	116.208	71.9111				4.07677	4.21348	3.98202		0.903931	2.74652	0.679571
0.685	98.1016	116.357	71.989				4.07455	4.20542	3.97416		0.905089	2.74935	0.680972
0.68542	98.1993	116.344	71.975				4.07362	4.20054	3.97956		0.904597	2.74233	0.681958
0.68583	98.259	116.477	72.2292				4.06934	4.19768	3.99146		0.902975	2.72911	0.682813
0.68625	98.6658	116.47	72.2299				4.07472	4.21413	3.98021		0.901016	2.714	0.683492
0.68667	98.6648	116.856	72.473				4.09682	4.19657	3.98344		0.89887	2.68187	0.683909
0.68708	98.7092	117.269	72.4438				4.05165	4.20527	3.98673		0.897531	2.62226	0.684091
0.6875	98.7365	117.535	72.5595				4.07709	4.18622	3.98216		0.897317	2.53485	0.68424
0.68792	98.8382	117.437	72.5867				4.06434	4.18876	3.98538		0.897967	2.45389	0.684387
0.68833	98.876	117.584	72.5606				4.09194	4.19088	3.98968		0.899365	2.39476	0.683636
0.68875	98.9013	117.3	72.5072				4.08597	4.19148	3.99072		0.899216	2.33622	0.681489
0.68917	99.1487	117.341	72.6505				4.08446	4.1861	3.98909		0.898097	2.2638	0.679476
0.68958	99.2935	117.528	72.8103				4.07084	4.19762	3.98118		0.897559	2.18709	0.678267
0.69	99.3989	118.546	72.7934				4.07091	4.19886	3.99142		0.897544	2.12682	0.677512
0.69042	99.4773	118.337	72.763				4.05115	4.21065	3.98476		0.897472	2.08532	0.676966
0.69083	99.4875	118.142	72.7532				4.05923	4.18934	3.99057		0.897169	2.06039	0.676479
0.69125	99.6422	118.763	73.1274				4.07557	4.21495	3.98537		0.899036	2.064	0.676076
0.69167	99.6534	118.747	73.9153				4.05561	4.2229	3.98156		0.902452	2.09958	0.675794
0.69208	99.8033	118.727	73.8206				4.07121	4.20463	3.98612		0.904892	2.14792	0.675636
0.6925	99.962	118.657	73.4716				4.09206	4.18959	3.99454		0.905523	2.17599	0.675508
0.69292	100.104	118.835	73.534				4.05522	4.19158	3.99429		0.904338	2.17998	0.675439
0.69333	100.234	119.294	73.6786				4.07102	4.19692	3.98981		0.904495	2.1863	0.675376
0.69375	100.167	119.386	73.6698				4.08587	4.22489	3.98981		0.906454	2.21171	0.675257
0.69417	100.418	119.214	73.8051				4.0615	4.19906	3.99638		0.90765	2.24685	0.67525
0.69458	100.769	119.798	73.8293				4.05649	4.17635	3.98902		0.908879	2.28529	0.675251
0.695	100.644	119.736	73.7803				4.06824	4.19891	3.99683		0.911627	2.31069	0.675188
0.69542	100.772	119.572	73.6764				4.06445	4.18678	3.97985		0.915914	2.31961	0.675268
0.69583	101.064	120.034	73.8469				4.07321	4.18841	3.99181		0.91814	2.29967	0.675605
0.69625	100.893	119.447	74.0738				4.06205	4.2023	3.99415		0.918027	2.24584	0.676086
0.69667	101.009	119.904	73.9999				4.06243	4.20774	3.99804		0.920213	2.19001	0.676425
0.69708	101.161	120.648	73.9212				4.07326	4.21473	4.00075		0.924617	2.14893	0.676604
0.6975	101.294	120.562	74.1713				4.0737	4.19689	3.99728		0.931054	2.11235	0.676741
0.69792	101.287	120.841	74.1881				4.07031	4.18836	3.99946		0.937381	2.05423	0.677001
0.69833	101.452	120.844	74.2294				4.08041	4.20835	3.99667		0.94128	1.97772	0.677242
0.69875	101.443	121.043	74.2995				4.06606	4.23475	4.00063		0.943205	1.89771	0.67734
0.69917	101.652	121.279	74.353				4.06613	4.21438	3.99794		0.943458	1.8124	0.677496
0.69958	101.796	121.102	74.5888				4.06216	4.19018	4.0053		0.941821	1.73964	0.677679
0.7	101.893	121.067	74.5547				4.07579	4.2071	4.00341		0.9571	1.6913	0.716065
0.70042	101.829	121.374	74.4324				4.07947	4.22411	3.99676		0.980822	1.65976	0.79072
0.70083	101.965	121.314	74.4366				4.08858	4.23316	3.99501		1.31273	1.62946	0.848334
0.70125	102.154	121.809	74.4606				4.07707	4.21589	4.00409		1.60592	1.60158	0.879442
0.70167	102.108	122.131	74.5132				4.08126	4.21235	4.00709		1.68166	1.57897	0.898503
0.70208	102.139	122.126	74.7108				4.0857	4.22083	4.01054		1.71829	1.57749	0.869309
0.7025	102.445	121.839	74.8149				4.08366	4.21547	4.00774		1.73858	1.60279	1.4389
0.70292	102.522	122.462	74.9459				4.10311	4.21035	4.00058		1.75159	1.62836	2.27671
0.70333	102.776	122.456	74.8269				4.10108	4.22234	4.00143		1.76131	1.63638	2.65734
0.70375	102.736	122.155	74.7555				4.07578	4.21395	4.00803		1.76884	1.63778	2.76967
0.70417	102.779	122.469	74.8439				4.09035	4.22012	4.01508		1.77414	1.65888	2.84509
0.70458	102.814	122.444	74.9868				4.07909	4.22178	4.00864		1.75916	1.68973	2.86591
0.705	102.95	122.839	74.8456				4.07955	4.21693	3.99996		1.73531	1.72247	2.84109
0.70542	103.179	122.582	74.8226				4.07714	4.22814	4.00788		1.40315	1.76723	2.82756
0.70583	103.352	123.21	75.1681				4.08711	4.24043	4.00521		1.10723	1.81786	2.8367
0.70625	103.363	123.029	75.5022				4.09778	4.21293	4.0128		1.02712	1.86638	2.85505
0.70667	103.461	123.45	75.5425				4.08945	4.20799	4.01136		0.984139	1.89687	2.91955
0.70708	103.538	123.376	75.4401				4.08164	4.20128	4.01006		0.956351	1.9177	2.38377
0.7075	103.663	123.658	75.5768				4.10572	4.18076	4.00889		0.936892	1.95351	1.57883
0.70792	103.932	123.342	75.6684				4.1094	4.20983	4.00945		0.922799	2.01624	1.2303
0.70833	103.845	123.584	75.6559				4.08153	4.2145	4.01228		0.912509	2.10131	1.14951
0.70875	103.942	123.666	75.7477				4.07823	4.21761	4.01989		0.905074	2.16907	1.10528
0.70917	104.013	123.913	76.1324				4.08447	4.20974	4.0187		0.899676	2.21071	1.07689
0.70958	104.443	124.041	76.0738				4.10294	4.21465	4.01215		0.895749	2.24621	1.05753
0.71	104.688	124.694	76.1246				4.10852	4.20435	4.02086		0.893053	2.29347	1.04388
0.71042	104.573	126.163	76.1718				4.10546	4.20746	4.02639		0.89139	2.3414	1.03417
0.71083	104.754	124.311	76.1873				4.11515	4.18949	4.01683		0.890395	2.39103	1.0272
0.71125	104.856	124.548	76.2304				4.0905	4.1907	4.02127		0.890029	2.44917	1.02223
0.71167	104.844	124.103	76.102				4.09533	4.19726	4.0225		0.890285	2.5062	1.01878
0.71208	105.198	124.727	76.2313				4.10331	4.21138	4.0225		0.890903	2.56857	1.01644
0.7125	105.182	124.904	76.6403				4.09988	4.2202	4.02018		0.89165	2.61728	1.01524
0.71292	105.462	124.716	76.7382				4.09789	4.19139	4.01686		0.892538	2.64779	1.01482
0.71333	105.448	125.037	77.1212				4.09398	4.19404	4.02167		0.893558	2.69064	1.01506
0.71375	105.517	125.647	77.0304				4.09036	4.17563	4.01528		0.894749	2.73619	1.0159
0.71417	105.472	125.38	77.1533				4.09333	4.19771	4.01828		0.896369	2.77642	1.01713
0.71458	105.604	125.799	77.186				4.12639	4.23001	4.0146		0.89832	2.80594	1.01866
0.715	105.58	125.687	77.4932				4.11292	4.19585	4.0181		0.900539	2.8235	1.0205
0.71542	105.947	126.111	77.6442				4.09832	4.19117	4.01628		0.903127	2.8194	1.02281
0.71583	105.71	125.892	77.8483				4.12192	4.18838	4.02298		0.905833	2.82494	1.02558
0.71625	106.02	126.072	77.8634				4.12006	4.19754	4.01634		0.908511	2.84873	1.02863
0.71667	106.163	126.719	77.8444				4.11211	4.21513	4.02239		0.91117	2.86798	1.03155
0.71708	106.276	126.721	77.7964				4.12744	4.19429	4.02488		0.913948	2.89187	1.03428
0.7175	106.351	126.199	77.9904				4.14461	4.20635	4.0264		0.91687	2.90464	1.03709
0.71792	106.397	126.328	78.341				4.11631	4.19895	4.02925		0.919795	2.89798	1.04007
0.71833	106.419	126.547	78.7363				4.11908	4.20673	4.02593		0.922663	2.89906	1.04316
0.71875	106.614	126.286	79.025				4.12516	4.21356	4.02511		0.925279	2.90194	1.04642
0.71917	106.601	126.605	79.3539				4.13435	4.20664	4.02964		0.927706	2.915	1.04974
0.71958	106.794	126.647	79.1605				4.10016	4.2125	4.02088		0.929979	2.93763	1.05294
0.72	106.741	126.811	79.2283				4.12944	4.18837	4.01947		0.932092	2.97846	1.056
0.72042	106.88	127.32	79.2308				4.11583	4.2005	4.01757		0.934137	3.01162	1.05896
0.72083	107.272	127.505	79.1962				4.10482	4.21238	4.02619		0.936239	3.02087	1.06185
0.72125	107.277	127.403	79.3767				4.0926	4.18961	4.01904		0.93852	3.00973	1.065
0.72167	107.18	127.705	79.2618				4.12235	4.19997	4.01624		0.94087	3.00772	1.0684
0.72208	107.197	127.699	79.3392				4.11532	4.19898	4.01833		0.943222	3.03782	1.07184
0.7225	107.367	127.745	79.695				4.11593	4.18325	4.02021		0.945579	3.06759	1.0752
0.72292	107.567	128.392	80.0789				4.11559	4.20038	4.01814		0.94784	3.08221	1.07869
0.72333	107.459	127.878	80.0873				4.09462	4.2111	4.02022		0.950117	3.07015	1.08207
0.72375	107.568	128.311	80.2401				4.09271	4.20831	4.02242		0.952585	3.02697	1.08522
0.72417	107.45	128.282	80.4483				4.09253	4.19502	4.03086		0.955281	2.97956	1.08846
0.72458	107.376	128.499	80.664				4.0988	4.19997	4.02584		0.958052	2.92081	1.09181
0.725	107.596	128.523	80.757				4.10096	4.20637	4.02007		0.960672	2.86574	1.09524
0.72542	107.693	128.177	80.7015				4.11112	4.2043	4.02033		0.963079	2.82368	1.09874
0.72583	107.634	128.737	81.0336				4.09272	4.21397	4.02734		0.965421	2.79451	1.10241
0.72625	107.735	128.95	81.149				4.09804	4.19621	4.01576		0.967788	2.79047	1.10602
0.72667	107.76	129.052	81.1175				4.09663	4.18682	4.01896		0.970239	2.79518	1.10948
0.72708	108.007	128.679	81.2531				4.08256	4.21014	4.01804		0.972723	2.79165	1.11287
0.7275	108.035	128.909	81.3144				4.07156	4.211	4.0268		0.97541	2.79677	1.11611
0.72792	108.007	128.743	81.4044				4.08296	4.20177	4.02037		0.978173	2.85738	1.11917
0.72833	108.017	129.133	81.5634				4.11125	4.21191	4.02039		0.980831	2.94056	1.12235
0.72875	108.096	129.825	81.7213				4.10016	4.21157	4.02706		0.983321	2.97614	1.12563
0.72917	108.067	129.689	81.762				4.08241	4.19836	4.02796		0.985679	2.9855	1.12904
0.72958	108.217	129.689	81.7417				4.08132	4.19317	4.02084		0.988158	2.97094	1.1325
0.73	108.303	129.668	81.7767				4.08098	4.20528	4.02146		0.990878	2.93587	1.13587
0.73042	108.408	129.953	81.9942				4.08441	4.20171	4.01892		0.99366	2.90399	1.13903
0.73083	108.555	130.028	81.8856				4.08407	4.1922	4.01242		0.996571	2.82474	1.14211
0.73125	108.397	130.501	82.0242				4.06986	4.19959	4.01384		0.999559	2.70342	1.14537
0.73167	108.519	129.989	82.1284				4.08466	4.19574	4.02239		1.00254	2.58781	1.1488
0.73208	108.473	130.396	82.1178				4.0817	4.20828	4.01813		1.0054	2.4697	1.15262
0.7325	108.532	130.377	82.2788				4.07417	4.21975	4.01417		1.00809	2.31874	1.15694
0.73292	108.624	130.335	82.6593				4.0661	4.20546	4.01201		1.01068	2.15991	1.16109
0.73333	108.596	130.843	82.7624				4.06016	4.21185	4.01519		1.01329	2.05	1.16465
0.73375	108.737	130.805	82.8712				4.05533	4.21629	4.01208		1.01584	1.97753	1.16792
0.73417	108.759	131.138	82.8109				4.04685	4.19035	4.01348		1.0182	1.91915	1.17117
0.73458	108.803	131.388	82.8086				4.03911	4.17996	4.02705		1.02052	1.87565	1.17458
0.735	108.973	131.154	82.8662				4.0725	4.1949	4.02389		1.02293	1.82759	1.17857
0.73542	109.2	131.548	82.9832				4.05411	4.19605	4.01583		1.02535	1.78508	1.18296
0.73583	109.114	131.377	83.0145				4.05354	4.20951	4.01352		1.02771	1.75528	1.18732
0.73625	109.193	131.401	83.1406				4.0553	4.20393	4.0192		1.03017	1.72945	1.19154
0.73667	109.457	132.571	83.1743				4.04103	4.20738	4.02285		1.0328	1.70754	1.19559
0.73708	109.378	131.619	83.2123				4.04953	4.20627	4.02661		1.03554	1.69286	1.19935
0.7375	109.487	132.221	83.4356				4.06364	4.20525	4.03256		1.03837	1.68669	1.20297
0.73792	109.504	131.944	83.4721				4.04459	4.18037	4.01944		1.04113	1.68773	1.20734
0.73833	109.756	132.459	83.4259				4.04237	4.191	4.0243		1.04389	1.69944	1.21219
0.73875	109.838	132.445	83.5072				4.05238	4.18554	4.02495		1.04678	1.71554	1.21692
0.73917	109.663	132.297	83.5799				4.06019	4.17986	4.01813		1.04971	1.73825	1.22147
0.73958	109.699	132.784	83.7529				4.06788	4.17451	4.02673		1.05241	1.77751	1.22557
0.74	109.915	132.151	83.7858				4.05828	4.19598	4.01793		1.05495	1.81985	1.22952
0.74042	110.062	132.191	83.9947				4.0629	4.20741	4.01917		1.05746	1.85958	1.23357
0.74083	110.053	132.513	84.061				4.05194	4.18218	4.02317		1.05974	1.90643	1.2376
0.74125	110.403	132.676	84.0615				4.06358	4.18712	4.0279		1.06171	1.97196	1.24109
0.74167	110.192	133.214	84.0443				4.03822	4.18236	4.02775		1.0637	2.07467	1.24432
0.74208	110.351	133.461	84.2985				4.05602	4.21098	4.02792		1.06556	2.25989	1.24773
0.7425	110.498	132.917	84.4102				4.05174	4.21207	4.01583		1.06724	2.49728	1.25119
0.74292	110.477	133.069	84.5631				4.06284	4.20096	4.02328		1.0689	2.69706	1.25464
0.74333	110.648	132.865	84.6864				4.05833	4.18941	4.02324		1.07057	2.84993	1.25803
0.74375	110.927	133.696	84.6556				4.06948	4.20447	4.02646		1.07237	2.96995	1.26113
0.74417	111.134	133.273	84.7725				4.06962	4.21858	4.02474		1.07432	3.09393	1.26385
0.74458	111.126	134.077	84.7101				4.06598	4.20768	4.02515		1.07608	3.24571	1.26634
0.745	111.44	134.056	84.9105				4.06335	4.19538	4.02703		1.07794	3.36829	1.26844
0.74542	111.444	134.038	85.0628				4.06658	4.17946	4.02101		1.08	3.46491	1.27032
0.74583	111.558	133.759	85.1085				4.07568	4.18661	4.03689		1.08211	3.54869	1.2725
0.74625	111.627	133.751	85.1506				4.08092	4.19958	4.03311		1.08405	3.6567	1.27475
0.74667	111.59	134.024	85.2137				4.08671	4.1884	4.02778		1.08587	3.67637	1.27714
0.74708	111.656	134.793	85.29				4.10256	4.19607	4.0291		1.08798	3.64936	1.27922
0.7475	111.741	134.138	85.4144				4.08628	4.19068	4.02863		1.09025	3.69659	1.28088
0.74792	112.092	134.706	85.5351				4.08455	4.20172	4.04085		1.0923	3.78657	1.28247
0.74833	112.426	134.374	85.6683				4.09647	4.19274	4.03584		1.09408	3.89899	1.28433
0.74875	112.469	134.351	85.7931				4.10177	4.20716	4.03375		1.09594	3.99441	1.28644
0.74917	112.509	134.448	85.8555				4.09652	4.21204	4.03016		1.09798	4.06778	1.2885
0.74958	112.599	134.793	85.8591				4.09322	4.21364	4.03383		1.09986	4.18171	1.29073
0.75	112.676	134.438	86.0489				4.10026	4.21162	4.0301		1.10162	4.30582	1.29316
0.75042	112.878	134.795	86.0435				4.08692	4.20213	4.03538		1.10349	4.41392	1.29571
0.75083	112.864	134.928	86.0665				4.11645	4.18663	4.03101		1.10561	4.44125	1.29855
0.75125	112.968	134.633	86.1927				4.09588	4.18196	4.03279		1.10808	4.46884	1.3013
0.75167	113.053	134.822	86.2141				4.11309	4.1985	4.04626		1.11032	4.48036	1.30387
0.75208	113.08	135.099	86.2874				4.11465	4.20345	4.04868		1.11219	4.41914	1.30646
0.7525	113.202	135.036	86.4238				4.12225	4.20223	4.03988		1.11404	4.37428	1.30914
0.75292	113.435	135.44	86.5194				4.10695	4.17456	4.04466		1.11591	4.3751	1.3118
0.75333	113.346	135.521	86.5804				4.12564	4.17246	4.03934		1.11767	4.37452	1.31481
0.75375	113.432	135.226	86.6488				4.11715	4.18453	4.03942		1.11971	4.32998	1.31819
0.75417	113.499	134.949	86.7884				4.11235	4.20575	4.03839		1.12197	4.21669	1.32142
0.75458	113.468	135.146	86.8406				4.10791	4.18689	4.04413		1.12419	4.06348	1.32439
0.755	113.568	135.415	86.836				4.10541	4.19235	4.0338		1.1264	3.89842	1.32704
0.75542	113.769	135.616	87.02				4.10951	4.17338	4.03515		1.1283	3.73453	1.32963
0.75583	113.768	135.512	87.2026				4.10423	4.17797	4.03244		1.13002	3.56188	1.33252
0.75625	113.956	136.323	87.4167				4.11334	4.19531	4.03858		1.13194	3.39297	1.3357
0.75667	114.119	136.196	87.4347				4.10446	4.19402	4.03585		1.13421	3.25205	1.33887
0.75708	113.973	136.501	87.4764				4.11325	4.18247	4.03131		1.13649	3.08904	1.3421
0.7575	114.056	136.118	87.6049				4.10407	4.18694	4.0318		1.1387	2.87735	1.34545
0.75792	114.141	136.045	87.8055				4.07907	4.19366	4.03535		1.14095	2.66258	1.34852
0.75833	114.361	137.393	88.0375				4.0789	4.18088	4.04071		1.1429	2.48977	1.35121
0.75875	114.383	136.017	88.0713				4.071	4.17439	4.03896		1.14457	2.38386	1.35403
0.75917	114.287	136.166	88.1201				4.08566	4.17711	4.02937		1.14644	2.34905	1.35726
0.75958	114.553	136.222	88.1916				4.0754	4.16421	4.0333		1.1485	2.40513	1.36097
0.76	114.499	137.08	88.2158				4.08831	4.16419	4.02927		1.15072	2.54001	1.36496
0.76042	114.67	136.894	88.4232				4.08824	4.18526	4.02815		1.15289	2.73094	1.36862
0.76083	114.9	136.582	88.5461				4.07394	4.17594	4.03111		1.15474	2.95907	1.37195
0.76125	115.038	136.967	88.7136				4.06207	4.17275	4.03684		1.15655	3.18454	1.37532
0.76167	115.055	137.303	88.7975				4.07005	4.17218	4.03303		1.15871	3.40651	1.37862
0.76208	115.208	137.221	88.7763				4.06413	4.16108	4.0224		1.16103	3.6212	1.38185
0.7625	115.218	137.318	88.7644				4.05363	4.17121	4.02579		1.16323	3.85298	1.38533
0.76292	115.404	137.502	88.8247				4.06545	4.19836	4.02322		1.16544	4.08929	1.38912
0.76333	115.325	137.239	88.898				4.05148	4.19318	4.0291		1.16752	4.31353	1.3929
0.76375	115.495	137.154	89.1084				4.04987	4.18392	4.02207		1.16944	4.5154	1.39641
0.76417	115.57	137.321	89.0828				4.04853	4.18343	4.03026		1.1714	4.63435	1.3995
0.76458	115.532	137.412	89.055				4.05461	4.17469	4.03281		1.17345	4.66721	1.4021
0.765	115.68	138.184	89.025				4.0507	4.19042	4.01961		1.17562	4.61943	1.4047
0.76542	115.564	138.14	89.1072				4.05097	4.17879	4.02757		1.17777	4.49482	1.40753
0.76583	115.584	137.776	89.405				4.03566	4.16313	4.02339		1.17985	4.40848	1.4103
0.76625	115.775	137.931	89.3012				4.03792	4.19795	4.02504		1.18179	4.35012	1.41288
0.76667	115.89	137.793	89.393				4.05017	4.18662	4.02382		1.1837	4.33416	1.41508
0.76708	115.983	138.249	89.1423				4.05595	4.19121	4.01922		1.18587	4.31552	1.41681
0.7675	116.098	138.217	88.0278				4.04876	4.17304	4.01851		1.18812	4.25979	1.41825
0.76792	116.037	138.799	89.121				4.06846	4.17273	4.02686		1.19042	4.22783	1.41989
0.76833	116.407	138.65	89.2167				4.05414	4.17656	4.02975		1.19284	4.23825	1.42184
0.76875	116.231	138.323	89.4186				4.04528	4.17785	4.02294		1.19525	4.23939	1.42367
0.76917	116.296	138.534	89.6515				4.04702	4.17947	4.02457		1.19765	4.23762	1.42514
0.76958	116.406	138.553	89.6022				4.05816	4.17717	4.02387		1.19998	4.3023	1.42641
0.77	116.323	138.703	89.6805				4.03542	4.16621	4.02824		1.20243	4.41109	1.42758
0.77042	116.385	139.199	89.827				4.03741	4.18032	4.01796		1.20508	4.46703	1.42877
0.77083	116.693	138.904	90.0506				4.03955	4.18468	4.01467		1.20771	4.47401	1.43042
0.77125	116.656	138.942	90.0057				4.03286	4.18207	4.02492		1.21029	4.40996	1.43262
0.77167	116.747	139.184	90.0978				4.04594	4.17243	4.01966		1.2127	4.3077	1.43496
0.77208	116.781	139.186	90.2937				4.06406	4.16987	4.01507		1.21496	4.19996	1.43733
0.7725	117.17	139.457	90.3891				4.05278	4.17568	4.02312		1.21706	4.08908	1.43963
0.77292	117.18	139.239	90.3461				4.06718	4.18318	4.02404		1.21861	3.97968	1.44167
0.77333	117.319	139.641	90.423				4.07483	4.18948	4.02308		1.21957	3.93619	1.4439
0.77375	117.368	139.538	90.7274				4.07632	4.19225	4.02377		1.22026	3.93691	1.44656
0.77417	117.283	139.532	90.6052				4.06878	4.1772	4.02406		1.22099	3.91397	1.44922
0.77458	117.355	140.123	91.237				4.06313	4.16754	4.01981		1.22157	3.91242	1.45178
0.775	117.454	139.913	91.4395				4.06078	4.15607	4.01686		1.22188	3.94734	1.45427
0.77542	117.511	140.045	91.4642				4.08343	4.17992	4.02232		1.22219	3.97344	1.45652
0.77583	117.569	140.015	91.4724				4.0853	4.17721	4.01502		1.22261	3.98106	1.45875
0.77625	117.913	139.743	91.6657				4.08831	4.17562	4.01911		1.22292	4.01629	1.46104
0.77667	117.989	140.05	91.6652				4.08714	4.19012	4.01407		1.22315	4.10686	1.4633
0.77708	117.834	140.351	91.8619				4.07848	4.16927	4.01652		1.22368	4.22161	1.46522
0.7775	117.861	140.195	91.9976				4.08222	4.16377	4.01584		1.22487	4.3187	1.46695
0.77792	117.951	140.032	92.0476				4.08106	4.17185	4.01139		1.22647	4.36514	1.46868
0.77833	117.964	140.126	92.0841				4.09187	4.15708	4.01956		1.228	4.3527	1.47063
0.77875	118.247	140.08	92.2983				4.09506	4.18221	4.02002		1.22941	4.3217	1.47301
0.77917	118.222	140.291	92.1264				4.08474	4.17767	4.02161		1.23106	4.28924	1.47548
0.77958	118.291	140.299	92.274				4.095	4.16462	4.02444		1.23269	4.23474	1.47787
0.78	118.348	140.438	92.4006				4.07196	4.15268	4.01369		1.23417	4.22205	1.48019
0.78042	118.231	140.499	92.501				4.07134	4.13782	4.01453		1.23562	4.27641	1.48234
0.78083	118.295	140.628	92.4798				4.09076	4.16154	4.01744		1.23727	4.33311	1.48459
0.78125	118.526	141.135	92.6492				4.09294	4.15338	4.01522		1.23923	4.35344	1.48679
0.78167	118.434	140.729	92.6443				4.09417	4.14982	4.01616		1.24111	4.32983	1.48898
0.78208	118.402	141.156	92.7217				4.07313	4.13708	4.01105		1.24278	4.29068	1.49139
0.7825	118.593	141.068	92.8236				4.06274	4.13238	4.0067		1.24439	4.25967	1.49395
0.78292	118.631	141.659	92.8903				4.06288	4.15797	4.01285		1.24621	4.2721	1.49637
0.78333	118.461	141.211	92.8571				4.05871	4.15903	4.01457		1.24815	4.28571	1.49849
0.78375	118.646	141.408	92.9672				4.07015	4.15594	4.00537		1.25013	4.25044	1.50097
0.78417	118.674	141.395	93.2905				4.05614	4.15815	4.00519		1.25234	4.1889	1.50393
0.78458	118.916	141.396	93.342				4.04482	4.15978	4.00965		1.25456	4.12301	1.50676
0.785	118.974	141.488	93.272				4.05	4.16325	4.00309		1.25688	4.07642	1.50939
0.78542	118.848	141.546	93.4123				4.04507	4.15614	4.01384		1.25888	4.03437	1.51199
0.78583	118.877	141.578	93.5277				4.03537	4.14418	4.00996		1.26072	4.00239	1.51466
0.78625	119.011	141.637	93.6573				4.03202	4.14719	4.01107		1.26264	3.95771	1.51742
0.78667	118.941	141.938	93.8475				4.04671	4.14869	4.00426		1.26441	3.88537	1.52003
0.78708	119.169	141.988	93.6711				4.02879	4.13478	4.00771		1.26631	3.82053	1.52236
0.7875	118.953	141.831	93.692				4.05119	4.14105	4.00287		1.26852	3.7716	1.52452
0.78792	119.098	142.418	93.8566				4.04383	4.1456	4.00057		1.27076	3.73799	1.52648
0.78833	119.017	142.302	94.1469				4.02006	4.15807	3.99843		1.27273	3.73391	1.52765
0.78875	119.126	142.431	94.3132				4.01496	4.16129	3.99741		1.27466	3.77188	1.52823
0.78917	119.069	142.387	94.2221				4.02578	4.15187	4.00346		1.27671	3.83711	1.529
0.78958	119.494	142.509	94.3194				4.02409	4.14839	3.99731		1.2786	3.9075	1.5297
0.79	119.409	143.189	94.435				4.03474	4.15905	4.00131		1.28078	3.98947	1.53015
0.79042	119.431	142.588	94.433				4.01351	4.15657	3.99929		1.2831	4.07507	1.53038
0.79083	119.705	142.605	94.5196				4.03636	4.14694	3.99421		1.28514	4.16977	1.53035
0.79125	119.544	142.302	94.6319				4.01628	4.15004	3.99758		1.2871	4.28287	1.53036
0.79167	119.724	142.689	94.71				4.0054	4.14704	4.00135		1.28923	4.37992	1.53048
0.79208	119.635	142.57	94.8827				4.00423	4.15032	4.00125		1.2911	4.43181	1.53043
0.7925	119.863	142.788	94.8778				4.01527	4.14525	3.99152		1.29243	4.46387	1.53057
0.79292	120.178	142.528	95.0029				4.01965	4.14054	3.99467		1.29362	4.45457	1.53157
0.79333	119.993	143.572	95.3324				4.01085	4.14269	3.99871		1.29486	4.37807	1.53306
0.79375	120.053	145.343	95.3163				4.01899	4.1467	3.98891		1.296	4.26708	1.53444
0.79417	119.929	142.633	95.3714				4.01942	4.14101	3.99079		1.29683	4.11545	1.53584
0.79458	120.145	142.698	95.453				3.99848	4.12383	3.99483		1.29735	3.92732	1.53722
0.795	119.943	142.965	95.6323				4.0074	4.12829	3.9882		1.29774	3.74691	1.53885
0.79542	120.316	142.82	95.768				4.01375	4.13402	3.9845		1.29861	3.6028	1.54075
0.79583	120.316	143.172	95.6916				4.01902	4.14852	3.99368		1.30018	3.47085	1.54254
0.79625	120.041	143.355	95.949				4.01438	4.12273	3.99401		1.30159	3.31231	1.54437
0.79667	120.402	143.406	96.2181				4.00797	4.12451	3.99143		1.30263	3.14513	1.5463
0.79708	120.667	143.449	96.2184				4.01538	4.13898	3.98993		1.30388	2.98004	1.54811
0.7975	120.599	143.542	96.3926				4.00751	4.14395	3.98909		1.30549	2.85022	1.54935
0.79792	120.689	143.437	96.4254				4.01164	4.13976	3.98015		1.30718	2.77859	1.55014
0.79833	120.829	143.428	96.6155				4.01494	4.14112	3.99187		1.30884	2.7249	1.55094
0.79875	120.767	144.002	96.5985				4.01232	4.12746	3.98574		1.31059	2.69268	1.55188
0.79917	120.526	143.754	96.6557				4.02179	4.12471	3.98905		1.31234	2.67146	1.55313
0.79958	120.703	144.295	96.9213				4.01045	4.12802	3.9884		1.31413	2.6482	1.55447
0.8	120.716	144.137	96.8456				4.00494	4.13601	3.98459		1.31607	2.63066	1.55582
0.80042	120.804	144.063	97.0531				3.99493	4.12153	3.98632		1.31788	2.6551	1.55719
0.80083	120.927	144.107	96.9724				3.98827	4.12591	3.99545		1.31973	2.7296	1.55859
0.80125	120.97	143.989	97.0688				4.02035	4.13766	3.99208		1.32184	2.86168	1.56021
0.80167	121.026	144.11	97.3445				4.00854	4.13461	3.98916		1.3239	3.05548	1.56173
0.80208	121.126	144.718	97.4035				4.01438	4.12811	3.99139		1.32553	3.23434	1.56318
0.8025	121.184	145.046	97.3808				4.02123	4.12615	3.98742		1.32681	3.33419	1.56473
0.80292	121.168	144.459	97.4748				4.01884	4.13667	3.98546		1.32809	3.36178	1.56626
0.80333	121.249	144.705	97.5326				4.02249	4.13799	3.99257		1.32967	3.35384	1.56779
0.80375	121.152	144.568	97.6391				4.01742	4.12168	3.99223		1.33137	3.34807	1.56931
0.80417	121.273	145.086	97.7512				4.03437	4.12914	3.98551		1.33259	3.33686	1.57067
0.80458	121.23	145.123	97.8102				4.01646	4.13844	3.98798		1.33319	3.29039	1.57209
0.805	121.497	145.082	97.9481				4.01377	4.13047	3.98534		1.33355	3.19979	1.57369
0.80542	121.527	144.812	98.0162				4.04859	4.13525	3.98562		1.33376	3.11218	1.57515
0.80583	121.486	144.9	98.0172				4.04086	4.13345	3.9919		1.3336	3.0399	1.57644
0.80625	121.536	145.511	98.1892				4.01878	4.13387	3.99415		1.33366	2.97481	1.57766
0.80667	121.66	145.093	98.2595				4.03093	4.12007	3.9917		1.33437	2.94164	1.57884
0.80708	121.791	144.579	98.2169				4.03278	4.13316	3.98555		1.33544	2.96207	1.57992
0.8075	121.801	144.766	98.3124				4.02964	4.11344	3.98402		1.33657	3.0289	1.58093
0.80792	121.894	145.329	98.3605				4.03026	4.11688	3.98863		1.33735	3.1172	1.58213
0.80833	122.135	145.082	98.5305				4.01847	4.1114	3.98583		1.33823	3.19355	1.58368
0.80875	121.969	144.984	98.6183				4.01624	4.12179	3.98131		1.33946	3.23878	1.58576
0.80917	122.068	145.406	98.6653				4.03745	4.12065	3.97411		1.34066	3.28254	1.58819
0.80958	122.145	145.295	98.8104				4.02807	4.11546	3.98054		1.89452	3.31975	1.59754
0.81	122.082	145.314	98.7054				4.04212	4.12349	3.98163		3.18638	3.32431	1.70876
0.81042	122.204	145.513	98.684				4.03052	4.11836	3.97711			3.25681	1.84274
0.81083	122.252	145.385	98.9014				4.01387	4.13504	3.98142			3.09854	1.89888
0.81125	122.17	145.583	99.0538				4.03373	4.11922	3.98199			2.91271	1.93078
0.81167	122.209	146.292	99.134				4.01658	4.1157	3.9776			2.74315	1.95154
0.81208	122.439	145.508	99.181				4.03342	4.10406	3.97138			2.58959	1.96605
0.8125	122.421	145.301	99.1539				4.04077	4.1041	3.97656			2.44018	1.97632
0.81292	122.572	145.606	99.18				4.01956	4.11673	3.97557			2.30696	1.98323
0.81333	122.545	145.765	99.2902				4.03158	4.11842	3.97892			2.20539	1.98768
0.81375	122.594	146.991	99.2884				4.01603	4.11491	3.98308			2.10892	1.99055
0.81417	122.775	145.678	99.4639				4.02406	4.11096	3.97949			2.01	1.98537
0.81458	122.818	146.017	99.4936				4.00863	4.10522	3.9722			1.92932	1.87731
0.815	122.893	146.007	99.6078				4.00648	4.10451	3.98101		2.76319	1.88485	1.74567
0.81542	122.787	146.405	99.4872				3.98735	4.10525	3.96901		2.43775	1.87441	1.69152
0.81583	122.579	146.58	99.7207				4.00612	4.11119	3.9719		2.3256	1.88276	1.66156
0.81625	122.684	146.178	99.7991				4.00864	4.11632	3.97184		2.25757	1.89684	1.64273
0.81667	122.693	146.63	99.7478				4.00668	4.11852	3.9719		2.2113	1.90991	1.62986
0.81708	122.863	145.793	99.9226				4.00765	4.10136	3.97165		2.18256	1.91922	1.62042
0.8175	122.873	146.018	99.9507				4.01563	4.10817	3.9707		2.16507	1.9289	1.61337
0.81792	122.907	146.246	100.08				4.00973	4.10722	3.96644		2.16061	1.93892	1.60808
0.81833	122.853	146.31	100.179				3.99663	4.11246	3.97019		2.16886	1.9459	1.60401
0.81875	123.097	146.624	100.217				3.99118	4.1002	3.97774		2.17499	1.95164	1.60101
0.81917	122.772	146.49	100.166				4.00554	4.09671	3.9782		2.17315	1.95332	1.59894
0.81958	122.61	146.503	100.224				3.99426	4.0966	3.97511		2.17136	1.95221	1.59757
0.82	122.675	146.527	100.482				3.99292	4.09433	3.97151		2.17245	1.95198	1.59669
0.82042	122.882	146.618	100.429				3.98986	4.08422	3.96543		2.1736	1.95462	1.59584
0.82083	122.693	146.845	100.516				3.99526	4.1005	3.9585		2.17417	1.96109	1.59495
0.82125	122.811	146.5	100.496				3.9756	4.10867	3.96732		2.17612	1.96746	1.59419
0.82167	122.631	146.431	100.673				3.98344	4.11171	3.96189		2.17846	1.97315	1.59382
0.82208	122.84	146.572	100.763				3.97775	4.10295	3.97039		2.17898	1.98451	1.59397
0.8225	122.747	146.172	100.766				3.96935	4.10774	3.9675		2.17882	2.02768	1.59421
0.82292	122.933	146.408	101.057				3.98472	4.1107	3.96265		2.17404	2.10289	1.5941
0.82333	122.536	146.753	100.928				3.96639	4.09231	3.96828		2.17122	2.21475	1.59375
0.82375	122.692	146.256	100.901				3.96276	4.09836	3.95428		2.17821	2.33648	1.5936
0.82417	122.718	146.548	100.922				3.96497	4.0817	3.95775		2.18619	2.43798	1.59358
0.82458	122.857	146.84	101.124				3.98077	4.08216	3.96142		2.19141	2.55343	1.59339
0.825	122.541	146.419	101.338				3.96604	4.09011	3.96257		2.19945	2.68529	1.59329
0.82542	122.734	146.514	101.225				3.96349	4.07484	3.96263		2.20813	2.8365	1.59349
0.82583	122.832	146.761	101.396				3.97793	4.08318	3.95598		2.21525	2.96696	1.59409
0.82625	122.638	146.501	101.463				3.97608	4.10019	3.95186		2.22575	3.0373	1.59478
0.82667	122.654	146.896	101.285				3.97146	4.08199	3.95768		2.2366	3.08083	1.59525
0.82708	122.679	147.029	101.538				3.97737	4.09915	3.96185		2.23821	3.13941	1.5957
0.8275	122.576	147.38	101.549				3.97876	4.09359	3.95093		2.23149	3.23262	1.59635
0.82792	122.672	147.3	101.521				3.95979	4.08297	3.94563		2.22131	3.30086	1.59714
0.82833	122.745	146.914	101.684				3.95143	4.09176	3.95149		2.21178	3.33549	1.59782
0.82875	122.74	148.913	101.755				3.97021	4.07914	3.95177		2.20316	3.37329	1.59858
0.82917	122.935	147.049	101.821				3.95604	4.07727	3.94564		2.19634	3.40918	1.59966
0.82958	122.697	146.501	101.911				3.96644	4.07856	3.95029		2.19104	3.42966	1.60095
0.83	122.764	146.496	101.947				3.95623	4.0716	3.94382		2.18611	3.40388	1.6022
0.83042	122.895	146.661	101.991				3.96267	4.06655	3.95217		2.177	3.3722	1.60333
0.83083	122.836	146.93	102.134				3.95728	4.07287	3.94239		2.15709	3.40247	1.6046
0.83125	122.899	146.72	102.206				3.96215	4.07742	3.94415		2.13456	3.45011	1.60603
0.83167	122.962	146.983	102.196				3.97197	4.08206	3.94316		2.11898	3.43724	1.60749
[truncated: 5,741 more rows]
