# Supplementary material for: Extracellular electron transfer increases fermentation in lactic acid bacteria via a hybrid metabolism
Source: eLife. 2022 Feb 11;11:e70684. doi: 10.7554/eLife.70684 (PMC8837199; doi:10.7554/eLife.70684)
Supplement: Figure 2—figure supplement 1—source data 1. [file elife-70684-fig2-figsupp1-data1.xlsx]

## Sheet: Sheet1
EET locus homology matches at species level via tBLASTx from complete Lactobacillales genome dataset.
Species	Database (# strains)	atpase1	atpase2	dmkb	eeta	eetb	fmna	fmnb	ndh2	ppla
Abiotrophia defectiva	1	1	1	1	1	1	1	1	1	1
Acetilactobacillus jinshanensis	1	1	1	0	0	0	1	0	0	0
Aerococcus christensenii	1	1	1	1	1	1	1	1	1	0
Aerococcus sanguinicola	1	1	1	0	0	0	1	1	0	0
Aerococcus urinae	3	3	3	0	0	0	3	3	0	0
Aerococcus urinaeequi	3	3	3	0	0	0	3	3	0	0
Aerococcus urinaehominis	1	1	1	0	0	0	1	1	0	0
Aerococcus viridans	1	1	1	0	1	0	1	1	0	0
Amylolactobacillus amylophilus	1	1	1	1	1	1	1	1	1	1
Apilactobacillus kunkeei	1	1	1	1	0	0	1	0	0	0
Bombilactobacillus bombi	1	1	1	1	0	0	1	1	0	0
Carnobacterium divergens	1	1	1	1	1	1	1	1	1	1
Carnobacterium inhibens	1	1	1	1	1	1	1	1	1	1
Carnobacterium maltaromaticum	2	2	2	2	1	2	2	2	2	2
Companilactobacillus alimentarius	1	1	1	1	0	0	1	1	0	0
Companilactobacillus allii	1	1	1	1	0	0	1	1	0	0
Companilactobacillus crustorum	1	1	1	1	0	0	1	1	0	0
Companilactobacillus farciminis	1	1	1	1	0	0	1	1	0	0
Companilactobacillus futsaii	3	3	3	3	0	0	3	3	0	0
Companilactobacillus ginsenosidimutans	1	1	1	1	0	0	1	1	0	0
Companilactobacillus heilongjiangensis	1	1	1	1	0	0	1	1	0	0
Companilactobacillus metriopterae	1	1	1	1	0	0	1	0	0	0
Companilactobacillus pabuli	1	1	1	1	0	0	1	1	0	0
Companilactobacillus zhachilii	1	1	1	1	0	0	1	1	0	0
Dolosigranulum pigrum	1	1	1	1	1	1	1	1	0	0
Enterococcus avium	3	3	3	3	3	1	3	2	3	1
Enterococcus casseliflavus	8	8	8	8	8	8	8	8	8	8
Enterococcus cecorum	1	1	1	1	1	1	1	1	1	1
Enterococcus durans	2	2	2	2	2	2	2	2	2	2
Enterococcus faecalis	51	51	51	51	51	51	51	51	51	51
Enterococcus faecium	183	183	183	178	181	178	183	178	178	178
Enterococcus gallinarum	3	3	3	3	3	3	3	3	3	3
Enterococcus gilvus	1	1	1	1	0	0	1	1	1	0
Enterococcus hirae	12	12	12	12	12	12	12	12	12	12
Enterococcus lactis	1	1	1	1	1	1	1	1	1	1
Enterococcus mundtii	6	6	6	6	6	6	6	6	6	6
Enterococcus saigonensis	1	1	1	1	1	1	1	1	1	1
Enterococcus thailandicus	1	1	1	1	1	1	1	1	1	1
Enterococcus wangshanyuanii	1	1	1	1	1	1	1	1	1	1
Fructilactobacillus fructivorans	1	1	1	1	0	0	1	0	0	0
Fructilactobacillus lindneri	2	2	2	2	0	0	2	0	0	0
Fructilactobacillus sanfranciscensis	2	2	2	2	0	0	2	0	0	0
Furfurilactobacillus rossiae	4	4	4	4	4	4	4	4	4	0
Jeotgalibaca arthritidis	1	1	1	1	1	1	1	1	1	1
Jeotgalibaca ciconiae	1	1	1	1	1	1	1	1	1	1
Jeotgalibaca dankookensis	1	1	1	1	1	1	1	1	1	1
Jeotgalibaca porci	1	1	1	1	1	1	1	1	1	1
Lacticaseibacillus casei	4	4	4	4	4	4	4	4	4	4
Lacticaseibacillus paracasei	46	46	46	46	46	46	46	46	46	46
Lacticaseibacillus rhamnosus	28	28	28	28	28	28	28	28	28	28
Lacticaseibacillus zeae	1	1	1	1	1	1	1	1	1	1
Lactiplantibacillus argentoratensis	1	1	1	1	1	1	1	1	1	1
Lactiplantibacillus paraplantarum	3	3	3	3	3	3	3	3	3	3
Lactiplantibacillus pentosus	5	5	5	5	5	5	5	5	5	5
Lactiplantibacillus plantarum	138	138	138	138	138	138	138	138	138	138
Lactobacillus acetotolerans	4	4	4	1	1	1	4	4	1	2
Lactobacillus acidophilus	8	8	8	0	0	0	8	8	8	0
Lactobacillus amylolyticus	2	2	2	0	0	0	2	2	0	0
Lactobacillus amylovorus	3	3	3	1	0	0	3	3	1	1
Lactobacillus apis	1	1	1	0	0	0	1	1	0	0
Lactobacillus crispatus	8	8	8	8	0	0	8	8	8	0
Lactobacillus delbrueckii	25	25	25	0	0	0	25	25	0	0
Lactobacillus gasseri	5	5	5	5	0	0	5	5	0	0
Lactobacillus helsingborgensis	1	1	1	1	1	1	1	1	1	1
Lactobacillus helveticus	17	17	17	17	0	0	17	17	0	0
Lactobacillus iners	7	7	7	0	0	0	7	0	0	0
Lactobacillus jensenii	2	2	2	1	0	0	2	2	1	0
Lactobacillus johnsonii	14	14	14	14	0	0	14	14	0	0
Lactobacillus kefiranofaciens	3	3	3	3	0	0	3	3	3	0
Lactobacillus kullabergensis	1	1	1	0	0	0	1	1	0	0
Lactobacillus paragasseri	3	3	3	3	0	0	3	3	0	0
Lactobacillus ultunensis	1	1	1	1	0	0	1	1	1	0
Lactococcus garvieae	9	9	9	9	9	9	9	9	9	0
Lactococcus lactis	47	47	47	47	47	47	47	47	47	1
Lactococcus petauri	1	1	1	1	1	1	1	1	1	0
Lactococcus piscium	1	1	1	1	1	1	1	1	1	0
Lactococcus raffinolactis	6	6	6	6	6	6	6	6	6	0
Lapidilactobacillus dextrinicus	1	1	1	0	0	0	1	1	0	0
Latilactobacillus curvatus	11	11	11	11	10	11	11	11	7	11
Latilactobacillus graminis	1	1	1	1	1	1	1	1	1	1
Latilactobacillus sakei	20	20	20	0	0	0	20	0	0	0
Lentilactobacillus buchneri	3	3	3	3	0	0	3	0	3	0
Lentilactobacillus curieae	1	1	1	1	0	0	1	1	1	0
Lentilactobacillus hilgardii	3	3	3	3	0	0	3	3	3	0
Lentilactobacillus kefiri	1	1	1	1	0	0	1	0	1	0
Lentilactobacillus parabuchneri	3	3	3	3	0	0	3	0	3	0
Leuconostoc carnosum	2	2	2	2	0	0	2	0	2	0
Leuconostoc citreum	6	6	6	6	0	0	6	6	6	0
Leuconostoc garlicum	1	1	1	1	0	0	1	0	1	0
Leuconostoc gelidum	6	6	6	6	0	0	6	0	6	0
Leuconostoc kimchii	2	2	2	2	0	0	2	0	2	0
Leuconostoc lactis	4	4	4	4	0	0	4	0	4	0
Leuconostoc mesenteroides	20	20	20	20	0	0	20	0	20	0
Leuconostoc pseudomesenteroides	3	3	3	3	0	0	3	0	3	0
Leuconostoc suionicum	2	2	2	2	0	0	2	0	2	0
Levilactobacillus brevis	18	18	18	18	0	0	18	0	0	0
Levilactobacillus koreensis	1	1	1	1	0	0	1	0	0	0
Levilactobacillus suantsaii	1	1	1	1	0	0	1	1	0	0
Levilactobacillus zymae	1	1	1	1	0	0	1	1	0	0
Ligilactobacillus acidipiscis	1	1	1	1	0	0	1	1	1	0
Ligilactobacillus agilis	1	1	1	1	0	0	1	1	1	0
Ligilactobacillus animalis	2	2	2	2	0	0	2	2	2	0
Ligilactobacillus murinus	3	3	3	3	0	0	3	3	3	0
Ligilactobacillus ruminis	1	1	1	0	0	0	1	1	0	0
Ligilactobacillus saerimneri	1	1	1	1	0	0	1	0	0	0
Ligilactobacillus salivarius	9	9	9	9	0	0	9	9	9	0
Limosilactobacillus fermentum	22	22	22	22	0	0	22	22	22	0
Limosilactobacillus frumenti	1	1	1	1	0	0	1	1	1	0
Limosilactobacillus gastricus	1	1	1	1	0	0	1	1	1	0
Limosilactobacillus mucosae	2	2	2	1	0	0	2	2	1	0
Limosilactobacillus pontis	1	1	1	0	0	0	1	1	0	0
Limosilactobacillus reuteri	19	19	19	19	0	0	19	19	19	0
Limosilactobacillus vaginalis	1	1	1	1	0	0	1	1	1	0
Liquorilactobacillus hordei	1	1	1	1	0	0	1	1	1	0
Liquorilactobacillus mali	1	1	1	1	0	0	1	1	1	0
Liquorilactobacillus nagelii	1	1	1	1	0	0	1	1	1	0
Loigolactobacillus backii	5	5	5	5	5	5	5	5	5	0
Loigolactobacillus coryniformis	3	3	3	3	3	3	3	3	3	3
Melissococcus plutonius	4	4	4	0	0	0	4	0	0	0
Oenococcus oeni	6	6	6	6	6	6	6	6	6	6
Oenococcus sicerae	1	1	1	1	1	1	1	1	1	1
Paucilactobacillus hokkaidonensis	1	1	1	1	1	0	1	0	0	0
Paucilactobacillus nenjiangensis	1	1	1	1	0	0	1	1	1	0
Paucilactobacillus oligofermentans	1	1	1	1	0	0	1	1	1	0
Pediococcus acidilactici	19	19	19	0	0	0	19	0	0	0
Pediococcus claussenii	3	3	3	3	0	0	3	0	3	0
Pediococcus damnosus	5	5	5	0	0	0	5	0	0	0
Pediococcus inopinatus	1	1	1	0	1	0	1	0	0	0
Pediococcus pentosaceus	19	19	19	0	0	0	19	19	0	0
Schleiferilactobacillus harbinensis	2	2	2	2	0	0	2	0	2	0
Secundilactobacillus malefermentans	1	1	1	0	0	0	1	1	0	0
Secundilactobacillus paracollinoides	3	3	3	3	0	0	3	3	3	0
Streptococcus acidominimus	1	1	1	1	1	1	1	1	1	1
Streptococcus agalactiae	79	79	79	79	0	0	79	79	79	0
Streptococcus anginosus	9	9	9	0	0	0	9	9	0	0
Streptococcus australis	3	3	3	0	0	0	3	3	0	0
Streptococcus canis	6	6	6	6	6	6	6	6	6	6
Streptococcus chenjunshii	1	1	1	0	0	0	1	1	0	0
Streptococcus constellatus	6	6	6	0	0	0	6	0	0	0
Streptococcus cristatus	4	4	4	0	0	0	4	4	0	0
Streptococcus dysgalactiae	25	25	25	25	25	25	25	25	25	18
Streptococcus equi	14	14	14	0	0	0	14	14	0	0
Streptococcus equinus	7	7	7	3	0	0	7	7	0	0
Streptococcus ferus	1	1	1	1	0	0	1	1	0	0
Streptococcus gallolyticus	7	7	7	0	0	0	7	7	0	0
Streptococcus gordonii	11	11	11	0	0	0	11	11	0	0
Streptococcus gwangjuense	1	1	1	0	0	0	1	1	0	0
Streptococcus halotolerans	1	1	1	1	1	1	1	1	1	1
Streptococcus himalayensis	1	1	1	0	0	0	1	0	0	0
Streptococcus infantarius	3	3	3	0	0	0	3	3	0	0
Streptococcus iniae	6	6	6	6	0	0	6	6	6	0
Streptococcus intermedius	7	7	7	0	0	0	7	7	0	0
Streptococcus koreensis	1	1	1	0	0	0	1	1	0	0
Streptococcus lutetiensis	6	6	6	0	0	0	6	6	0	0
Streptococcus macedonicus	1	1	1	0	0	0	1	1	0	0
Streptococcus marmotae	1	1	1	1	1	1	1	1	1	1
Streptococcus merionis	1	1	1	0	0	0	1	1	0	0
Streptococcus milleri	2	2	2	0	0	0	2	1	0	0
Streptococcus mitis	8	8	8	0	0	0	8	8	0	0
Streptococcus mutans	20	20	20	0	0	0	20	20	0	0
Streptococcus oralis	13	13	13	0	0	0	13	13	0	0
Streptococcus pantholopis	1	1	1	0	0	0	1	1	0	0
Streptococcus parasanguinis	2	2	2	0	0	0	2	2	0	0
Streptococcus parauberis	1	1	1	1	0	0	1	1	1	0
Streptococcus pasteurianus	3	3	3	0	0	0	3	3	0	0
Streptococcus periodonticum	1	1	1	0	0	0	1	1	0	0
Streptococcus pluranimalium	2	2	2	2	2	2	2	2	2	2
Streptococcus pneumoniae	81	81	81	0	0	0	81	81	0	0
Streptococcus porcinus	4	4	4	4	0	0	4	4	4	0
Streptococcus pseudopneumoniae	1	1	1	0	0	0	1	1	0	0
Streptococcus pseudoporcinus	3	3	3	3	0	0	3	3	3	0
Streptococcus pyogenes	217	217	217	0	0	0	217	217	0	0
Streptococcus ratti	1	1	1	0	0	0	1	1	0	0
Streptococcus respiraculi	1	1	1	1	1	1	1	1	1	1
Streptococcus ruminantium	1	1	1	1	1	1	1	1	1	1
Streptococcus salivarius	17	17	17	0	0	0	17	17	0	0
Streptococcus sanguinis	7	7	7	0	0	0	7	7	0	0
Streptococcus sobrinus	6	6	6	0	0	0	6	6	0	0
Streptococcus suis	64	64	64	64	64	64	64	64	64	64
Streptococcus thermophilus	65	65	65	65	0	0	65	65	0	0
Streptococcus troglodytae	1	1	1	0	0	0	1	1	0	0
Streptococcus uberis	4	4	4	4	0	0	4	4	4	0
Streptococcus urinalis	1	1	1	1	0	0	1	1	1	0
Streptococcus vestibularis	1	1	1	1	0	0	1	1	0	0
Streptococcus viridans	1	1	1	0	0	0	1	1	0	0
Suicoccus acidiformans	1	1	1	0	1	1	1	1	0	0
Tetragenococcus halophilus	5	5	5	5	5	5	5	5	5	4
Tetragenococcus koreensis	1	1	1	1	1	1	1	1	1	1
Tetragenococcus osmophilus	1	1	1	1	1	1	1	1	1	1
Vagococcus carniphilus	1	1	1	1	1	1	1	1	1	1
Vagococcus coleopterorum	1	1	1	1	1	1	1	1	1	1
Vagococcus hydrophili	1	1	1	1	1	1	1	1	1	1
Vagococcus penaei	1	1	1	1	1	1	1	1	1	1
Vagococcus teuberi	1	1	1	1	1	1	1	1	1	1
Weissella ceti	3	3	3	3	0	0	3	0	3	0
Weissella cibaria	10	10	10	10	0	0	10	10	10	0
Weissella confusa	3	3	3	3	0	0	3	0	3	0
Weissella cryptocerci	1	1	1	1	1	1	1	1	1	0
Weissella diestrammenae	1	1	1	0	0	0	1	0	1	0
Weissella hellenica	2	2	2	2	0	0	2	0	2	0
Weissella jogaejeotgali	1	1	1	1	0	0	1	0	1	0
Weissella koreensis	3	3	3	0	0	0	3	0	3	0
Weissella paramesenteroides	1	1	1	1	0	0	1	0	1	0
Weissella soli	1	1	1	1	0	0	1	0	1	0
Weissella viridescens	1	1	1	1	0	0	1	0	1	0
Carnobacterium sp. 17-4,	1	1	1	1	1	1	1	1	1	1
Carnobacterium sp. CP1	1	1	1	1	1	1	1	1	1	1
Carnobacterium sp. CS13	1	1	1	1	1	1	1	1	1	1
Enterococcus sp. CR-Ec1	1	1	1	1	1	1	1	1	1	1
Enterococcus sp. DA9	1	1	1	1	1	1	1	1	1	1
Enterococcus sp. FDAARGOS_375	1	1	1	1	1	1	1	1	1	1
Enterococcus sp. FDAARGOS_553	1	1	1	1	1	1	1	1	1	1
Enterococcus sp. M190262	1	1	1	1	1	1	1	1	1	1
Jeotgalibaca sp. PTS2502	1	1	1	1	1	1	1	1	1	1
Lactobacillus sp. 3B(2020)	1	1	1	1	0	0	1	1	1	0
Lactobacillus sp. BHWM-4	1	1	1	1	0	0	1	0	0	0
Lactobacillus sp. CBA3605	1	1	1	1	1	1	1	1	1	1
Lactobacillus sp. CBA3606	1	1	1	1	1	1	1	1	1	1
Lactobacillus sp. D1501	1	1	1	1	1	1	1	1	1	1
Lactobacillus sp. JM1	1	1	1	1	0	0	1	1	0	0
Lactobacillus sp. wkB8	1	1	1	1	1	1	1	1	1	1
Lactococcus sp. 1JSPR-7	1	1	1	1	1	1	1	1	1	0
Lactococcus sp. KACC	1	1	1	1	1	1	1	1	1	0
Lactococcus sp. TMW21612	1	1	1	1	1	1	1	1	1	0
Lactococcus sp. TMW21615	1	1	1	1	1	1	1	1	1	0
Leuconostoc sp. C2,	1	1	1	1	0	0	1	0	1	0
Leuconostoc sp. LN180020	1	1	1	1	0	0	1	1	1	0
Marinilactibacillus sp. 15R	1	1	1	1	1	1	1	1	1	1
Oenococcus sp. UCMA	1	1	1	1	1	1	1	1	1	0
Streptococcus sp. 'group	1	1	1	1	0	0	1	1	1	0
Streptococcus sp. 116-D4	1	1	1	0	0	0	1	1	0	0
Streptococcus sp. 1643	1	1	1	0	0	0	1	1	0	0
Streptococcus sp. A12	1	1	1	0	0	0	1	1	0	0
Streptococcus sp. CNU	3	3	3	0	0	0	3	3	0	0
Streptococcus sp. DAT741	1	1	1	1	1	1	1	1	1	1
Streptococcus sp. FDAARGOS_192	1	1	1	0	0	0	1	1	0	0
Streptococcus sp. FDAARGOS_520	1	1	1	1	0	0	1	1	1	0
Streptococcus sp. FDAARGOS_521	1	1	1	1	0	0	1	1	1	0
Streptococcus sp. FDAARGOS_522	1	1	1	1	0	0	1	1	1	0
Streptococcus sp. I-G2,	1	1	1	0	0	0	1	1	0	0
Streptococcus sp. I-P16,	1	1	1	0	0	0	1	1	0	0
Streptococcus sp. KS	1	1	1	0	0	0	1	1	0	0
Streptococcus sp. LPB0220	1	1	1	0	0	0	1	1	0	0
Streptococcus sp. NCTC	1	1	1	1	1	1	1	1	1	1
Streptococcus sp. NPS	1	1	1	0	0	0	1	1	0	0
Streptococcus sp. oral	2	2	2	0	0	0	2	2	0	0
Vagococcus sp. CF-49	1	1	1	1	1	1	1	1	1	1
Vagococcus sp. MN-17	1	1	1	1	1	1	1	1	1	1
Weissella sp. HDW19	1	1	1	0	0	0	1	0	1	0
