# Supplementary material for: Extracellular electron transfer increases fermentation in lactic acid bacteria via a hybrid metabolism
Source: eLife. 2022 Feb 11;11:e70684. doi: 10.7554/eLife.70684 (PMC8837199; doi:10.7554/eLife.70684)
Supplement: Figure 2—figure supplement 2—source data 1. [file elife-70684-fig2-figsupp2-data1.xlsx]

## Sheet: Panel B
Relative expression of EET genes by two L. plantarum strains (versus L. plantarum NCIMB8826) through RT-PCR.
raw Ct	L. plantarum NCIMB8826 (control)	L. plantarum 8.1	L. plantarum ATCC 700965	dCT	L. plantarum NCIMB8826 (control)	L. plantarum 8.1	L. plantarum ATCC 700965	Avg Control dCT	L. plantarum NCIMB8826 (control)	ddCT	L. plantarum 8.1	L. plantarum ATCC 700965	fold change	L. plantarum 8.1	L. plantarum ATCC 700965	Log 2 Fold change	L. plantarum 8.1	L. plantarum ATCC 700965
rpoB (control)	18.901	22.2097	23.5463
	18.4227	25.4493	20.703
	18.5253	19.7853	21.197
ndh2	16.0967	24.926	25.0397		-2.80433	2.71633	1.49333		-2.89289		5.60922	4.38622		0.0204859	0.0478207		-5.60922	-4.38622
	15.5913	27.8663	20.844		-2.83133	2.417	0.141				5.30989	3.03389		0.0252095	0.122098		-5.30989	-3.03389
	15.4823	23.5507	20.8703		-3.043	3.76533	-0.326667				6.65822	2.56622		0.00990092	0.168846		-6.65822	-2.56622
pplA	17.5857	27.61	23.7183		-1.31533	5.40033	0.172		-1.66733		7.06767	1.83933		0.00745453	0.279451		-7.06767	-1.83933
	16.8773	29.8583	20.662		-1.54533	4.409	-0.041				6.07633	1.62633		0.0148198	0.32391		-6.07633	-1.62633
	16.384	26.6253	20.6097		-2.14133	6.84	-0.587333				8.50733	1.08		0.00274813	0.473029		-8.50733	-1.08

## Sheet: Panel C
Relative expression of EET genes L. plantarum NCIMB8826 under several growth conditions (versus mMRS control) through RT-PCR.
raw Ct	mMRS	DHNA	Iron	Both	dCT	mMRS	DHNA	Iron	Both	Avgerage control Ct	mMRS	ddCT	DHNA	Iron	Both	Fold change	DHNA	Iron	Both	Log 2 Fold change	DHNA	Iron	Both
rpoB (control)	18.9543	18.211	18.5837	19.0197
	18.715	18.5353	18.4443	19.1577
	18.8413	18.916	18.0217	18.674
ndh2	20.108	19.5143	19.8623	19.672		1.15367	1.30333	1.27867	0.652333		1.32833		-0.025	-0.0496667	-0.676		1.01748	1.03503	1.5977		0.025	0.0496667	0.676
	19.918	19.8033	19.6387	19.4433		1.203	1.268	1.19433	0.285667				-0.0603333	-0.134	-1.04267		1.04271	1.09733	2.06003		0.0603333	0.134	1.04267
	20.4697	20.1813	19.4053	19.0003		1.62833	1.26533	1.38367	0.326333				-0.063	0.0553333	-1.002		1.04464	0.962372	2.00277		0.063	-0.0553333	1.002
pplA	19.3743	19.0923	19.2267	18.8107		0.42	0.881333	0.643	-0.209		0.613444		0.267889	0.0295556	-0.822444		0.830534	0.979722	1.7684		-0.267889	-0.0295556	0.822444
	19.0217	19.6103	19.1177	18.6153		0.306667	1.075	0.673333	-0.542333				0.461556	0.0598889	-1.15578		0.726203	0.959338	2.22804		-0.461556	-0.0598889	1.15578
	19.955	19.5353	18.744	18.0833		1.11367	0.619333	0.722333	-0.590667				0.00588889	0.108889	-1.20411		0.995926	0.927302	2.30395		-0.00588889	-0.108889	1.20411
