# Supplementary material for: Extracellular electron transfer increases fermentation in lactic acid bacteria via a hybrid metabolism
Source: eLife. 2022 Feb 11;11:e70684. doi: 10.7554/eLife.70684 (PMC8837199; doi:10.7554/eLife.70684)
Supplement: Figure 2—source data 1. [file elife-70684-fig2-data1.xlsx]

## Sheet: Panel A
EET locus homology matches at genus level via tBLASTx from complete Lactobacillales genome dataset.
Genus	Database (# strains)	atpase1	atpase2	dmkb	eeta	eetb	fmna	fmnb	ndh2	ppla
Abiotrophia	1	1	1	1	1	1	1	1	1	1
Acetilactobacillus	1	1	1	0	0	0	1	0	0	0
Aerococcus	10	10	10	1	2	1	10	10	1	0
Amylolactobacillus	1	1	1	1	1	1	1	1	1	1
Apilactobacillus	1	1	1	1	0	0	1	0	0	0
Bombilactobacillus	1	1	1	1	0	0	1	1	0	0
Carnobacterium	7	7	7	7	6	7	7	7	7	7
Companilactobacillus	12	12	12	12	0	0	12	11	0	0
Dolosigranulum	1	1	1	1	1	1	1	1	0	0
Enterococcus	280	279	279	274	276	271	279	273	274	271
Fructilactobacillus	5	5	5	5	0	0	5	0	0	0
Furfurilactobacillus	4	4	4	4	4	4	4	4	4	0
Jeotgalibaca	5	5	5	5	5	5	5	5	5	5
Lacticaseibacillus	79	79	79	79	79	79	79	79	79	79
Lactiplantibacillus	147	147	147	147	147	147	147	147	147	147
Lactobacillus	112	112	112	62	6	6	112	106	29	8
Lactococcus	68	68	68	68	68	68	68	68	68	1
Lapidilactobacillus	1	1	1	0	0	0	1	1	0	0
Latilactobacillus	32	32	32	12	11	12	32	12	8	12
Lentilactobacillus	11	11	11	11	0	0	11	4	11	0
Leuconostoc	48	48	48	48	0	0	48	7	48	0
Levilactobacillus	21	21	21	21	0	0	21	2	0	0
Ligilactobacillus	18	18	18	17	0	0	18	17	16	0
Limosilactobacillus	47	47	47	45	0	0	47	47	45	0
Liquorilactobacillus	3	3	3	3	0	0	3	3	3	0
Loigolactobacillus	8	8	8	8	8	8	8	8	8	3
Marinilactibacillus	1	1	1	1	1	1	1	1	1	1
Melissococcus	4	4	4	0	0	0	4	0	0	0
Oenococcus	8	8	8	8	8	8	8	8	8	7
Paucilactobacillus	3	3	3	3	1	0	3	2	2	0
Pediococcus	47	47	47	3	1	0	47	19	3	0
Schleiferilactobacillus	2	2	2	2	0	0	2	0	2	0
Secundilactobacillus	4	4	4	3	0	0	4	4	3	0
Streptococcus	752	752	752	276	104	104	752	744	206	97
Suicoccus	1	1	1	0	1	1	1	1	0	0
Tetragenococcus	7	7	7	7	7	7	7	7	7	6
Vagococcus	7	7	7	7	7	7	7	7	7	7
Weissella	28	28	28	23	1	1	28	11	28	0

## Sheet: Panel B
Strain	L. plantarum NCIMB8826	L. plantarum NCIMB700965	L. plantarum 8.1	L. plantarum AJ11	L. plantarum B1.3	L. plantarum ATCC 202195	L. pentosus BGM48	L. casei BL23	L. rhamnosus GG	E. faecium ATCC 8459	E. faecalis ATCC 29212	L. murinus ASF361	L. lactis IL1403	L. brevis ATCC 367	P. pentosaceus ATCC 25745	S. agalactiae ATCC 27956
[Fe2+] (mM)	0.420561	0.028722	0.026445	0.15544	0.134213	0.162887	0.315368	0.408316	0.505413	0.189426	0.344108	0	0	0.00547919	0	0
	0.456702	0.025175	0.023309	0.145957	0.13778	0.142878	0.248615	0.401001	0.500021	0.228097	0.338091	0	0	0.00601613	0	0
	0.373592	0.027005	0.024429	0.16104	0.142487	0.147731	0.301948	0.399524	0.492757	0.202744	0.338531	0	0	0.00519282	0	0

## Sheet: Panel C
Relative expression of EET genes in L. plantarum (through RNA-seq) under both DHNA and Iron supplementation (versus mMRS control).
Locus Name	Locus Tag	EET Gene	Product	COG ID#	Primary COG description	GeneID (Entrez)	BOTH - Log2 FC	BOTH - p-adjusted
hepB1	lp_1066	dmkB	heptaprenyl diphosphate synthase component II	COG0142	Coenzyme transport and metabolism	1063454	0.18	0.426
hepA	lp_1067	eetB	heptaprenyl diphosphate synthase component I	COG4769	Function unknown	1063445	0.39	0.072
lp_1068	lp_1068	eetA	extracellular protein, DUF1312 famliy	COG5341	Function unknown	1063442	0.38	0.09
ndh2	lp_1069	ndh2	NADH dehydrogenase, membrane-anchored	COG1252	Energy production and conversion	1063441	0.63	0
lp_1070	lp_1070	pplA	lipoprotein precursor, FMN-binding protein	COG4939	Function unknown	1063433	0.67	0
apbE1	lp_1072	fmnB	thiamin biosynthesis lipoprotein ApbE	COG1477	Coenzyme transport and metabolism	1063429	0.32	0.102
lp_1073	lp_1073	ATPase2	ABC transporter, ATP-binding protein	COG1122	Inorganic ion transport and metabolism	1063428	0.15	0.513
lp_1074	lp_1074	ATPase1	ABC transporter, ATP-binding protein	COG1122	Inorganic ion transport and metabolism	1063425	-0.01	0.967
lp_1075	lp_1075	fmnA	ABC transporter, permease protein	COG0619	Inorganic ion transport and metabolism	1063416	0.19	0.447
