# Supplementary material for: Extracellular electron transfer increases fermentation in lactic acid bacteria via a hybrid metabolism
Source: eLife. 2022 Feb 11;11:e70684. doi: 10.7554/eLife.70684 (PMC8837199; doi:10.7554/eLife.70684)
Supplement: Figure 3—figure supplement 1—source data 1. [file elife-70684-fig3-figsupp1-data1.xlsx]

## Sheet: Panel A
ORP reduction by L. plantarum in mMRS supplemented with iron and DHNA.
Time (hr)	mMRS + Iron			mMRS + Iron + DHNA			mMRS + Iron control	mMRS + Iron + DHNA control
0	57.7065	75.5151	67.8479	118.38	112.731	102.365	90.4859	161.3
1	45.9964	65.1197	58.7571	90.7679	94.914	63.9177	86.8724	160.787
2	12.0755	29.8287	37.6735	-130.365	-98.5524	-144.306	84.9357	158.89
3	-38.2751	-26.6257	-6.66971	-194.091	-192.109	-198.178	83.3993	158.49
4	-56.1023	-57.181	-33.1377	-261.416	-275.326	-284.568	82.8494	156.721
5	-54.0673	-51.4938	-32.8642	-269.732	-294.671	-299.405	82.8849	154.69
6	-47.2297	-37.851	-26.5608	-265.258	-293.071	-356.684	82.8379	154.681
7	-33.0359	-27.2516	-8.54777	-265.81	-296.651	-331.425	83.0167	153.859
8	14.357	10.6398	27.8398	-282.161	-287.74	-339.459	83.8236	153.264
9	55.1168	57.5898	65.0435	-325.757	-301.082	-333.743	84.5771	152.78
10	80.2283	82.1872	89.6288	-301.987	-295.624	-326.094	84.8307	152.795
11	88.1501	94.4131	95.4274	-289.217	-289.547	-318.141	84.8581	152.954
12	90.2866	99.0461	97.4135	-290.331	-283.428	-311.941	85.2695	154.211

## Sheet: Panel B
Growth (OD600) of L. plantarum strains in mMRS + DHNA + Iron.
Time (hr)	WT			Δndh2			ΔpplA
0	0.030667	0.003667	0.027667	0.021667	0.037667	0.018667	0.026667	0.014667	0.029667
1	0.034333	0.009333	0.028333	0.027333	0.039333	0.026333	0.031333	0.018333	0.028333
2	0.043667	0.011667	0.037667	0.036667	0.050667	0.031667	0.038667	0.027667	0.035667
3	0.067667	0.036667	0.060667	0.066667	0.083667	0.062667	0.061667	0.045667	0.055667
4	0.113667	0.081667	0.105667	0.125667	0.150667	0.119667	0.102667	0.073667	0.094667
5	0.203	0.162	0.19	0.231	0.263	0.228	0.179	0.135	0.158
6	0.329667	0.277667	0.313667	0.375667	0.413667	0.371667	0.289667	0.232667	0.261667
7	0.544333	0.470333	0.505333	0.618333	0.671333	0.607333	0.438333	0.360333	0.396333
8	0.848667	0.750667	0.795667	0.923667	0.986667	0.896667	0.681667	0.554667	0.599667
9	1.233	1.096	1.145	1.268	1.342	1.216	1.034	0.867	0.932
10	1.63867	1.47367	1.54067	1.62667	1.69067	1.55067	1.41667	1.25767	1.31967
11	1.92633	1.74933	1.85833	1.89833	1.96933	1.83833	1.79733	1.63233	1.69333
12	2.14967	1.96667	2.09367	2.12567	2.19667	2.04567	2.13067	1.99267	2.03667
13	2.29833	2.11133	2.26233	2.27633	2.34933	2.20033	2.35233	2.24533	2.27533
14	2.41367	2.20767	2.37467	2.37867	2.45167	2.30567	2.49267	2.41167	2.42667
15	2.48	2.279	2.443	2.456	2.513	2.377	2.588	2.52	2.529
16	2.539	2.327	2.496	2.502	2.56	2.424	2.652	2.598	2.598
17	2.576	2.359	2.53	2.534	2.595	2.459	2.696	2.652	2.643
18	2.60367	2.38367	2.55667	2.55967	2.62067	2.48367	2.72967	2.68867	2.67367
19	2.623	2.402	2.578	2.579	2.642	2.502	2.753	2.717	2.695
20	2.642	2.417	2.592	2.593	2.658	2.517	2.769	2.735	2.71
21	2.653	2.428	2.601	2.605	2.67	2.526	2.781	2.75	2.716
22	2.664	2.438	2.609	2.619	2.681	2.534	2.787	2.759	2.724
23	2.67333	2.44833	2.61533	2.62533	2.68833	2.53733	2.79033	2.76233	2.72333
24	2.67667	2.45167	2.61667	2.63267	2.69267	2.53967	2.79167	2.76467	2.72267

## Sheet: Panel C
pH measured from Figure 3B.
Control	WT	Δndh2	ΔpplA
6.51	3.85	3.85	4
6.57	3.83	3.85	3.98
	3.85	3.85	3.98

## Sheet: Panel D
pH from Figure 3 - Figure Supplement 1A.
mMRS + Iron Control	mMRS + DHNA + Iron Control	mMRS + Iron	mMRS + Iron + DHNA
6.55	6.53	3.93	4.01
		3.96	4
		3.95	4

## Sheet: Panel E
Reduction of iron by L. plantarum strains at mid-exponential phase.
Group	WT	Δndh2	WT	ΔpplA
[Fe+2] (mM)	0.294168	0.029069	0.376364	0.033943
	0.253845	0.027921	0.330963	0.027067
	0.301224	0.026772	0.31843	0.034807

## Sheet: Panel F
Reduction of iron by L. plantarum strains at stationary phase.
Group	WT	Δndh2	WT	ΔpplA
[Fe+2] (mM)	0.041282	0.000234	0.0393	0.030656
	0.048224	0.001021	0.049164	0.034853
	0.073025	0.001021	0.044824	0.030011
