# Supplementary material for: Extracellular electron transfer increases fermentation in lactic acid bacteria via a hybrid metabolism
Source: eLife. 2022 Feb 11;11:e70684. doi: 10.7554/eLife.70684 (PMC8837199; doi:10.7554/eLife.70684)
Supplement: Figure 3—source data 1. [file elife-70684-fig3-data1.xlsx]

## Sheet: Panel A
Iron reduction by L. plantarum NCIMB8826 and two FLEET deletion mutants.
Strain	WT	Δndh2	ΔpplA
[Fe2+] (mM)	0.210264	0.031264	0.031861
	0.206456	0.033915	0.035707
	0.198428	0.038955	0.038881

## Sheet: Panel B
Reduction of environmental redox potential (mV) by L. plantarum strains.
Time (hrs)	Control		WT			ndh2			pplA
0	202.27	122.255	114.978	101.269	106.515	102.915	115.142	109.059	70.4622	86.477	72.0641
1	196.28	119.458	-141.877	-106.795	-113.351	-23.2435	12.2466	-10.8404	-65.7392	-76.439	-102.461
2	193.431	116.818	-198.559	-170.433	-180.303	-109.954	-133.167	-117.662	-164.038	-165.929	-157.904
3	190.758	114.178	-285.168	-249.265	-264.634	-154.295	-165.758	-155.865	-217.817	-194.938	-190.82
4	188.33	111.59	-405.245	-301.005	-365.878	-195.548	-201.923	-187.029	-257.944	-246.033	-260.813
5	185.902	109.725	-382.774	-365.895	-362.631	-258.104	-272.811	-261.999	-301.554	-263.285	-258.543
6	184.229	108.544	-373.399	-309.752	-345.778	-262.535	-285.296	-236.86	-297.688	-264.347	-260.775
7	182.808	107.705	-354.358	-326.653	-353.94	-292.504	-302.57	-268.862	-257.312	-248.083	-246.866
8	181.386	106.866	-352.66	-350.288	-351.148	-305.101	-309.551	-291.12	-293.003	-251.03	-241.106
9	179.964	106.027	-346.88	-340.935	-344.98	-308.883	-311.774	-294.057	-253.8	-243.142	-243.522
10	179.106	105.187	-338.15	-334.251	-340.657	-305.256	-302.67	-298.125	-302.213	-242.667	-250.437
11	178.623	104.649	-329.96	-326.219	-334.015	-297.243	-297.133	-295.798	-280.643	-266.837	-289.672
12	178.14	104.711	-326.023	-321.66	-329.321	-287.666	-289.626	-283.308	-305.43	-286.867	-284.737

## Sheet: Panel C
Current production by L. plantarum NCIMB8826 and two FLEET-deletion mutants.
	uA/cm2	uA/cm2	uA/cm2		uA/cm2	uA/cm2	uA/cm2		uA/cm2	uA/cm2	uA/cm2
time/d	wt	wt	wt		ppla	ppla	ppla		ndh2	ndh2	ndh2
0.0840978	0.191636	0.312957	0.263436		24.5705	23.3434	23.9255		6.31346	4.94911	7.57505
0.0845144	0.116489	0.143049	0.198429		24.2796	23.3723	23.9316		6.22629	4.95081	7.39404
0.0849311	0.0936599	0.114716	0.158554		24.3687	23.3669	23.9041		6.20672	4.94987	7.45043
0.0853478	0.0833488	0.10208	0.140179		24.6364	23.4798	23.89		6.24653	4.93956	7.51712
0.0857644	0.0761031	0.094161	0.129965		24.5175	23.5049	23.9101		6.28892	4.91744	7.58668
0.0861811	0.0730053	0.0886071	0.123705		24.3949	23.4623	23.9679		6.26942	4.94738	7.58122
0.0865978	0.0694337	0.0857167	0.118908		24.5158	23.3958	23.8501		6.20235	4.9336	7.51377
0.0870144	0.0677843	0.082579	0.114905		24.4617	23.4837	23.8942		6.22254	4.93512	7.53941
0.0874311	0.0654825	0.081084	0.112373		24.4846	23.551	23.9357		6.23643	4.93856	7.34505
0.0878478	0.0647727	0.0790212	0.110874		24.3149	23.583	24.0174		6.24186	4.94708	7.39623
0.0882644	0.0634465	0.0776418	0.109063		24.2293	23.496	24.0373		6.2215	4.93018	7.45685
0.0886811	0.0624944	0.0767484	0.107792		24.5527	23.471	24.0344		6.26143	4.93664	7.65563
0.0890978	0.0624011	0.0755954	0.106568		24.3202	23.4605	24.1112		6.29233	4.94945	7.44144
0.0895144	0.060815	0.075071	0.105847		24.5557	23.3555	24.0462		6.23552	4.9724	7.46445
0.0899311	0.0605433	0.0742428	0.10507		24.6423	23.2991	24.0353		6.2113	4.97546	7.62439
0.0903478	0.0604055	0.0734608	0.104328		24.4983	23.3329	24.0038		6.23262	4.95165	7.5091
0.0907644	0.0601919	0.0733911	0.103999		24.5506	23.3888	24.0459		6.25917	4.95075	7.47233
0.0911811	0.059499	0.0725761	0.103793		24.5448	23.481	24.0956		6.24851	4.96195	7.37753
0.0915978	0.0587939	0.0720127	0.102759		24.4367	23.5604	24.0962		6.21942	4.94951	7.40176
0.0920144	0.0591783	0.0716938	0.102778		24.5255	23.4315	24.1382		6.21406	4.94165	7.53955
0.0924311	0.0583432	0.0714446	0.102285		24.2741	23.4508	24.1728		6.20645	4.96524	7.47535
0.0928478	0.058429	0.0709274	0.101766		24.5046	23.4358	24.1449		6.22741	4.97062	7.49239
0.0932644	0.0581333	0.0708806	0.101695		24.2832	23.4352	24.164		6.18477	4.96136	7.44011
0.0936811	0.057962	0.0710235	0.100921		24.543	23.5073	24.1489		6.2076	4.9522	7.53276
0.0940978	0.05785	0.0701191	0.100692		24.4811	23.5651	24.1663		6.19609	4.94418	7.60958
0.0945144	0.0571573	0.0702415	0.100639		24.784	23.5081	24.1764		6.20303	4.94724	7.66511
0.0949311	0.0571125	0.0699942	0.100697		24.7588	23.4647	24.1748		6.19736	4.94975	7.49122
0.0953478	0.0574946	0.0696719	0.0995688		25.2329	23.5064	24.1911		6.20088	4.96041	7.51286
0.0957644	0.0567671	0.0699804	0.100356		24.9069	23.4783	24.2055		6.20977	4.96802	7.61214
0.0961811	0.0569589	0.0693969	0.0996245		24.7123	23.4821	24.1479		6.18799	4.96259	7.55546
0.0965978	0.0567741	0.0691505	0.0999769		24.8652	23.4232	24.1825		6.15764	4.9679	7.39476
0.0970144	0.0563614	0.0692486	0.0996117		24.9856	23.4616	24.2621		6.16337	4.93004	7.57059
0.0974311	0.0565769	0.0692987	0.0993857		24.8903	23.5772	24.3187		6.20639	4.93232	7.44417
0.0978478	0.0565547	0.0690577	0.0991538		25.0378	23.5461	24.2917		6.18255	4.94133	7.50041
0.0982644	0.0564348	0.0688322	0.0984689		24.8344	23.5508	24.305		6.23147	4.93753	7.70884
0.0986811	0.0563144	0.0687212	0.0987658		24.9621	23.5271	24.3543		6.24698	4.93122	7.65664
0.0990978	0.0560937	0.0687996	0.0989675		24.8816	23.4867	24.3495		6.23207	4.93521	7.55739
0.0995144	0.0561839	0.0684819	0.0987146		25.0288	23.5686	24.3783		6.23048	4.92778	7.50058
0.0999311	0.0557019	0.0685382	0.0985172		24.8472	23.5497	24.3856		6.20889	4.92263	7.40528
0.100348	0.0558912	0.0684333	0.098407		24.7737	23.6004	24.3385		6.24217	4.94503	7.62393
0.100764	0.0560462	0.0676228	0.0983418		25.0441	23.5715	24.4262		6.23115	4.96732	7.39345
0.101181	0.0555328	0.06842	0.0984139		25.0573	23.5431	24.4465		6.22836	4.96443	7.44133
0.101598	0.0556206	0.068074	0.0984876		25.0939	23.6191	24.4508		6.24825	4.95936	7.634
0.102014	0.0553755	0.0678238	0.0985745		24.9371	23.6063	24.4153		6.28143	4.96112	7.60069
0.102431	0.0556533	0.0678215	0.0974688		25.293	23.5675	24.4938		6.25107	4.94683	7.49573
0.102848	0.0554835	0.0681133	0.0975009		25.3424	23.5569	24.4479		6.26268	4.9441	7.35307
0.103264	0.0554442	0.0675899	0.0974338		24.9808	23.5471	24.4775		6.22054	4.94615	7.52196
0.103681	0.0555541	0.0676926	0.0977253		25.2161	23.5799	24.4952		6.22691	4.9544	7.62348
0.104098	0.0552679	0.0674054	0.0982437		25.5244	23.6853	24.4578		6.23383	4.94452	7.51081
0.104514	0.0554321	0.0673602	0.0978335		25.2234	23.5467	24.4789		6.20693	4.95096	7.42214
0.104931	0.055348	0.0676941	0.0976675		25.0964	23.5647	24.5366		6.21444	4.94705	7.49033
0.105348	0.0553794	0.0675454	0.0974721		25.0165	23.6403	24.5309		6.23126	4.93584	7.35267
0.105764	0.0555847	0.0675497	0.097398		25.0852	23.5731	24.5772		6.25926	4.93831	7.47867
0.106181	0.05519	0.0674957	0.0969632		25.1517	23.5351	24.5191		6.24338	4.96092	7.55419
0.106598	0.054843	0.0673367	0.0975366		25.3797	23.5566	24.5687		6.26651	4.92654	7.56494
0.107014	0.0552418	0.0674972	0.0975126		25.442	23.5938	24.6195		6.27103	4.94068	7.50899
0.107431	0.0549181	0.0677118	0.096936		25.2801	23.5703	24.5893		6.25272	4.96155	7.57671
0.107848	0.0550684	0.0675607	0.097031		25.3329	23.5732	24.5691		6.23416	4.96887	7.38307
0.108264	0.0549642	0.0672225	0.096764		25.4231	23.529	24.5876		6.21904	4.9672	7.60021
0.108681	0.055023	0.0673551	0.0973214		25.6962	23.6619	24.6132		6.26294	4.96938	7.56333
0.109098	0.0551769	0.0671825	0.0977113		25.4936	23.7021	24.6249		6.26173	4.97005	7.65507
0.109514	0.0555795	0.0674073	0.0972635		25.5436	23.6162	24.702		6.22957	4.97421	7.63782
0.109931	0.0546978	0.0673082	0.0970444		25.7138	23.6902	24.7085		6.22387	4.94873	7.55296
0.110348	0.0547443	0.067418	0.0970329		25.6892	23.6073	24.7023		6.26752	4.93954	7.47397
0.110764	0.0548492	0.0671623	0.0975762		25.8728	23.5915	24.7735		6.24175	4.95118	7.31012
0.111181	0.055041	0.0672151	0.0966786		25.7045	23.5696	24.7157		6.22035	4.96012	7.51755
0.111598	0.0545912	0.0669771	0.0970933		25.3597	23.5652	24.7315		6.23577	4.95914	7.57436
0.112014	0.054882	0.0671964	0.0975315		25.673	23.5663	24.7675		6.22162	4.95001	7.38256
0.112431	0.0546714	0.0671193	0.0974406		25.5355	23.5966	24.7873		6.24121	4.97124	7.54969
0.112848	0.0554354	0.0673551	0.0964052		25.8306	23.5911	24.7549		6.2153	4.98398	7.69731
0.113264	0.05501	0.0670035	0.0970652		25.8404	23.5687	24.7714		6.23385	4.97817	7.57027
0.113681	0.0545786	0.0671035	0.0965343		25.7883	23.5891	24.7397		6.24792	4.96165	7.49549
0.114098	0.0552935	0.0671358	0.0964229		26.0189	23.6504	24.731		6.21828	4.96462	7.55344
0.114514	0.0549724	0.0673346	0.0969671		26.0051	23.701	24.7269		6.20768	4.96404	7.44117
0.114931	0.0547899	0.0670215	0.0969066		25.7589	23.7049	24.6938		6.22153	4.96317	7.49419
0.115348	0.0546589	0.0667723	0.0970735		25.9044	23.753	24.7587		6.22453	4.98123	7.51785
0.115764	0.0550836	0.0674813	0.0971336		26.1156	23.6396	24.7311		6.23412	4.96391	7.50251
0.116181	0.0552213	0.0671244	0.0963161		26.1366	23.6773	24.7086		6.22942	4.95288	7.58192
0.116598	0.0548579	0.0671297	0.0971713		26.0962	23.6524	24.7306		6.28688	4.9458	7.66408
0.117014	0.054939	0.0671118	0.0963777		26.0582	23.6334	24.8201		6.26188	4.94611	7.40042
0.117431	0.0552799	0.066855	0.0961717		26.1461	23.6332	24.8619		6.2413	4.96488	7.37922
0.117848	0.0547879	0.0669234	0.0960204		26.0436	23.5692	24.808		6.24157	4.98517	7.5283
0.118264	0.0542248	0.0674395	0.0969352		26.1969	23.6486	24.9092		6.23946	4.98504	7.43415
0.118681	0.0548949	0.0670489	0.0964481		26.0931	23.7037	24.9366		6.26809	4.97438	7.41762
0.119098	0.0550749	0.0672928	0.0968126		26.0944	23.6979	24.9902		6.2229	4.9665	7.45539
0.119514	0.05458	0.0668694	0.0966345		25.8947	23.6899	24.9356		6.2323	4.94496	7.38925
0.119931	0.0550319	0.066826	0.0968621		26.0606	23.6759	24.9657		6.26312	4.96436	7.54495
0.120348	0.0548671	0.0672372	0.0966348		25.9491	23.6761	25.0164		6.23672	4.97455	7.35742
0.120764	0.0547855	0.067245	0.0966702		25.8722	23.6726	24.9611		6.23865	4.95942	7.48504
0.121181	0.0549818	0.0668574	0.0960504		25.9583	23.718	24.9556		6.23417	4.97574	7.61432
0.121598	0.0547475	0.0669343	0.0960783		26.0695	23.707	24.9441		6.23194	4.99043	7.3422
0.122014	0.0545796	0.0668776	0.0960793		26.3469	23.6649	24.9544		6.23488	4.98019	7.50793
0.122431	0.0551106	0.066665	0.09566		26.6018	23.6586	24.9624		6.23812	4.94938	7.50847
0.122848	0.0549664	0.0671593	0.0959259		26.6263	23.5781	25.0462		6.25123	4.94608	7.42187
0.123264	0.0547936	0.0669379	0.0957657		26.5272	23.6718	25.0762		6.22371	4.96249	7.51237
0.123681	0.0548343	0.0669159	0.0963327		26.4908	23.6116	25.0429		6.17009	4.9546	7.4761
0.124098	0.0546584	0.0667944	0.0958385		26.4207	23.6118	25.0589		6.20489	4.94771	7.40315
0.124514	0.0542924	0.0666779	0.096168		26.139	23.6891	25.1235		6.24897	4.95326	7.46401
0.124931	0.0551197	0.0666984	0.0961609		26.4025	23.7151	25.1376		6.20847	4.94874	7.46307
0.125348	0.0549172	0.0666946	0.0959283		26.4576	23.7288	25.0778		6.17668	4.93843	7.38726
0.125764	0.0545853	0.0668403	0.0955232		26.3079	23.7945	25.0658		6.2071	4.93548	7.49261
0.126181	0.0544399	0.0667445	0.0957272		26.4056	23.6589	25.1099		6.24095	4.97194	7.33734
0.126598	0.0544997	0.0666053	0.0957475		26.4795	23.6283	25.0894		6.18882	4.96662	7.42026
0.127014	0.0548351	0.066585	0.0962043		26.4603	23.6763	25.1366		6.18259	4.95953	7.51687
0.127431	0.0548105	0.0664082	0.0963623		26.3716	23.6864	25.1182		6.21225	4.96745	7.54171
0.127848	0.0549411	0.0664132	0.0959986		26.4342	23.7435	25.1349		6.24303	4.96962	7.54634
0.128264	0.0543091	0.0664922	0.0961164		26.4276	23.6896	25.0823		6.23446	4.97059	7.46699
0.128681	0.0548522	0.0664918	0.0964188		26.3889	23.806	25.1264		6.21216	4.95297	7.48436
0.129098	0.0545333	0.0665593	0.0959887		26.6078	23.7827	25.1611		6.21088	4.95621	7.4975
0.129514	0.0549257	0.0666626	0.0961958		26.8635	23.7908	25.2274		6.2155	4.97995	7.4738
0.129931	0.0546557	0.0667822	0.096607		26.8075	23.7941	25.1576		6.21134	4.99225	7.39224
0.130348	0.0547856	0.0666562	0.0961332		26.8349	23.797	25.1157		6.21881	4.96503	7.42506
0.130764	0.0544681	0.0664672	0.0958237		26.6884	23.7728	25.1241		6.22596	4.95357	7.34628
0.131181	0.0544384	0.0666176	0.0956582		26.4788	23.751	25.1403		6.19687	4.96842	7.32708
0.131598	0.0543621	0.0664046	0.0961041		26.4999	23.7441	25.1424		6.18815	4.98444	7.38903
0.132014	0.054339	0.0666178	0.0992815		26.5191	23.7214	25.2324		6.19956	4.97966	7.54778
0.132431	0.0547526	0.0666101	0.096281		26.6936	23.7048	25.3051		6.20715	4.95886	7.40158
0.132848	0.0544611	0.0665511	0.0956882		26.9138	23.7169	25.2148		6.19509	4.92177	7.48377
0.133264	0.0546492	0.066343	0.0958559		26.852	23.7008	25.2753		6.1806	4.92321	7.52586
0.133681	0.0544052	0.066366	0.0955141		26.7748	23.7708	25.2691		6.21627	4.96188	7.49603
0.134098	0.0542163	0.0662761	0.0958053		26.7978	23.7829	25.3098		6.20115	4.97776	7.45598
0.134514	0.054578	0.0664019	0.096163		27.0621	23.7236	25.3434		6.18524	4.95841	7.49007
0.134931	0.0546667	0.0664111	0.0955191		26.7604	23.6541	25.3518		6.16821	4.93586	7.4917
0.135348	0.0547073	0.0664252	0.0958573		26.8051	23.7625	25.3965		6.15389	4.93545	7.42866
0.135764	0.0542284	0.0662714	0.0957362		27.0552	23.7254	25.3613		6.1434	4.93736	7.45492
0.136181	0.0548721	0.0665357	0.0956591		27.2984	23.7427	25.4077		6.12973	4.95388	7.44343
0.136598	0.054477	0.0665023	0.0956932		27.1747	23.7077	25.4595		6.13208	4.96441	7.58088
0.137014	0.0544353	0.0668745	0.0954919		27.0245	23.7988	25.4587		6.15172	4.97091	7.61262
0.137431	0.0547265	0.0664744	0.0956084		26.9967	23.8208	25.4227		6.16489	4.963	7.39368
0.137848	0.0541236	0.0667702	0.0957634		27.014	23.8252	25.4521		6.13919	4.94384	7.34089
0.138264	0.054276	0.0665488	0.0962065		26.8576	23.8126	25.4217		6.1554	4.94076	7.39428
0.138681	0.054169	0.0664446	0.0957951		26.833	23.7556	25.4792		6.16263	4.9422	7.32952
0.139098	0.0546785	0.0665046	0.0960415		27.0609	23.7994	25.4616		6.14876	4.94896	7.30247
0.139514	0.0543733	0.0666933	0.0955962		27.2765	23.7282	25.4616		6.15423	4.96042	7.50634
0.139931	0.0548384	0.066523	0.0955846		27.2099	23.8037	25.4864		6.18078	4.95384	7.489
0.140348	0.054319	0.0662085	0.095635		27.3138	23.8197	25.5249		6.19515	4.94494	7.5832
0.140764	0.0542448	0.0667824	0.0957039		27.2509	23.7885	25.4751		6.17718	4.94596	7.51187
0.141181	0.0545919	0.0662196	0.0964388		27.2444	23.8088	25.547		6.19478	4.95578	7.57762
0.141598	0.0541685	0.0667288	0.0962382		27.2297	23.8119	25.546		6.20074	4.9623	7.52216
0.142014	0.0544607	0.0664127	0.0963876		27.0278	23.7666	25.5784		6.17465	4.96915	7.54841
0.142431	0.0548283	0.0666633	0.095577		27.2631	23.837	25.5974		6.14589	4.98967	7.37743
0.142848	0.0546769	0.0666224	0.0959662		27.5452	23.8608	25.6048		6.17332	4.99475	7.39468
0.143264	0.0548026	0.0666008	0.0958953		27.7566	23.8923	25.6669		6.18172	4.97995	7.41601
0.143681	0.0544729	0.0665902	0.0955525		27.572	23.8552	25.6941		6.1681	4.95223	7.41562
0.144098	0.054605	0.066705	0.096088		27.5629	23.9109	25.658		6.18274	4.93738	7.50553
0.144514	0.0538017	0.0666949	0.0960186		27.6731	23.8979	25.6795		6.15889	4.9515	7.5044
0.144931	0.0544002	0.0665254	0.0964244		27.8955	23.9081	25.6609		6.16536	4.96955	7.47021
0.145348	0.0551633	0.0666656	0.0960384		27.8412	23.8927	25.6876		6.17656	4.94609	7.47293
0.145764	0.0539771	0.0666706	0.0954675		27.9535	23.8864	25.6841		6.17503	4.96025	7.58163
0.146181	0.0545633	0.0665193	0.095803		27.582	23.8478	25.7284		6.19639	4.98302	7.38164
0.146598	0.0540316	0.0668047	0.0960261		27.7654	23.7893	25.7709		6.20351	4.97445	7.3893
0.147014	0.0544191	0.0664499	0.0959663		27.7162	23.834	25.7291		6.19783	4.95258	7.43773
0.147431	0.054241	0.066484	0.0963275		27.6444	23.7746	25.7762		6.24476	4.96668	7.56365
0.147848	0.0543831	0.066613	0.0966138		27.7641	23.7977	25.8301		6.21922	4.98004	7.49674
0.148264	0.0545318	0.0669335	0.0963931		27.6283	23.8153	25.8183		6.17234	4.96337	7.39313
0.148681	0.0549526	0.0666204	0.0958817		27.7253	23.873	25.8712		6.1234	4.95194	7.53741
0.149098	0.0547749	0.0666073	0.095681		27.4869	23.9607	25.9022		6.17135	4.9464	7.49826
0.149514	0.0545965	0.066739	0.0959821		27.8882	23.9766	25.8202		6.23364	4.93348	7.47261
0.149931	0.0547539	0.06672	0.0964098		27.7483	23.9057	25.8982		6.24416	4.9472	7.36358
0.150348	0.0546923	0.0665296	0.0953529		28.0881	23.8787	25.8797		6.22969	4.96392	7.45636
0.150764	0.0545612	0.0668813	0.0954893		28.12	23.9029	25.8872		6.24923	4.97417	7.40404
0.151181	0.0543769	0.0666191	0.095388		28.079	23.8017	25.9151		6.21421	4.98176	7.36435
0.151598	0.0547421	0.0667081	0.0961305		27.9186	23.8437	25.9057		6.1959	4.98177	7.61465
0.152014	0.0543091	0.0669258	0.0955384		27.9967	23.914	25.9047		6.18984	4.98498	7.44557
0.152431	0.0544376	0.0667663	0.0954676		28.1409	23.8981	25.9973		6.21582	4.96602	7.42697
0.152848	0.0545723	0.0665568	0.0956129		28.1177	23.9339	25.9515		6.2053	4.94755	7.53381
0.153264	0.0544604	0.0669584	0.0957803		28.1081	23.8843	25.987		6.18285	4.95186	7.40024
0.153681	0.0543729	0.0663055	0.0956581		28.2815	23.8858	26.0355		6.1927	4.92996	7.44455
0.154098	0.0544191	0.0668648	0.0954775		28.3577	23.8986	25.9553		6.17139	4.93123	7.45793
0.154514	0.0542271	0.0667159	0.0954111		28.2182	23.9158	26.0132		6.18725	4.96191	7.45862
0.154931	0.0545	0.066357	0.0955449		28.1555	23.9982	26.015		6.16953	4.967	7.48528
0.155348	0.0544354	0.0668622	0.095795		28.0994	23.9321	26.0617		6.1555	4.94064	7.29696
0.155764	0.0543975	0.0667332	0.0959969		28.3327	23.8637	26.0722		6.17451	4.94623	7.23822
0.156181	0.0546088	0.0668144	0.0948851		28.1951	23.8524	26.0202		6.17571	4.95605	7.4575
0.156598	0.0544134	0.0665261	0.0952775		28.5618	23.9826	26.123		6.15542	4.9455	7.67283
0.157014	0.0540803	0.0667763	0.0955451		28.5275	24.0276	26.062		6.15175	4.94227	7.41109
0.157431	0.0547845	0.0666373	0.0959012		28.3771	23.9952	26.1128		6.16047	4.91608	7.37784
0.157848	0.0546492	0.0665942	0.0954248		28.4313	23.8833	26.0459		6.19753	4.93295	7.45209
0.158264	0.054071	0.0668118	0.0949861		28.5441	23.9203	25.9942		6.1645	4.93949	7.41907
0.158681	0.0549007	0.0667465	0.0958947		28.6263	24.0028	26.0414		6.18185	4.93105	7.25838
0.159098	0.0539655	0.0667536	0.095242		28.5339	23.8626	26.1073		6.21093	4.92761	7.42914
0.159514	0.054471	0.0666675	0.0950558		28.5552	23.9151	26.1454		6.18383	4.9377	7.4274
0.159931	0.0537477	0.0666473	0.0950495		28.8703	23.8892	26.0605		6.19275	4.93917	7.4492
0.160348	0.0543814	0.0665358	0.0951601		28.6048	23.8319	26.1758		6.15975	4.93479	7.56007
0.160764	0.054097	0.0667103	0.0948995		28.8763	23.9362	26.167		6.17057	4.94965	7.49408
0.161181	0.0539759	0.0668795	0.0956859		28.7133	24.0235	26.1818		6.1863	4.94636	7.36438
0.161598	0.0542061	0.0666915	0.0952513		28.6513	24.1114	26.2398		6.16506	4.92314	7.42476
0.162014	0.0541061	0.0668614	0.0945583		28.5914	23.9937	26.1573		6.16841	4.93542	7.45688
0.162431	0.05425	0.0666855	0.0948275		28.6356	23.9817	26.0662		6.18179	4.94692	7.40706
0.162848	0.0544328	0.0665678	0.094704		28.693	24.0431	26.1191		6.15754	4.95541	7.41066
0.163264	0.0547504	0.0667254	0.0951752		28.7556	24.0159	26.2105		6.13782	4.93493	7.48666
0.163681	0.054146	0.0671493	0.0951547		28.7264	23.9924	26.2228		6.16685	4.89714	7.29618
0.164098	0.0542331	0.0666522	0.0950862		28.8047	23.9812	26.2628		6.18736	4.92575	7.5754
0.164514	0.0538454	0.0668305	0.0948668		28.9132	24.0199	26.2392		6.1451	4.95549	7.4921
0.164931	0.0544392	0.0666186	0.0948663		28.8973	24.014	26.2925		6.15759	4.97108	7.42543
0.165348	0.0545563	0.0668051	0.0948274		28.9737	23.9868	26.3528		6.19081	4.96569	7.43417
0.165764	0.0541486	0.0667448	0.0952749		29.1881	24.0186	26.3109		6.18737	4.96943	7.54088
0.166181	0.054193	0.0667091	0.0954592		28.956	24.0078	26.3466		6.16551	4.95417	7.47079
0.166598	0.0542937	0.0667543	0.0952855		28.88	24.0337	26.3506		6.17776	4.92266	7.38028
0.167014	0.0541114	0.0664781	0.0949894		28.8956	24.0478	26.3942		6.21573	4.92602	7.34049
0.167431	0.0545164	0.0668893	0.0957829		29.0548	24.0667	26.4183		6.20157	4.9356	7.4725
0.167848	0.0545045	0.066639	0.0947853		29.1826	24.0544	26.3547		6.18249	4.93493	7.35887
0.168264	0.0546892	0.0669509	0.0952424		29.1777	24.0427	26.3391		6.16142	4.95415	7.39127
0.168681	0.054326	0.0666849	0.0952991		29.0833	24.0083	26.4096		6.2226	4.97689	7.41995
0.169098	0.0543337	0.0668346	0.0950151		29.1154	23.9558	26.4165		6.20872	4.96585	7.47575
0.169514	0.0541354	0.0668583	0.0949503		29.1654	24.0402	26.3911		6.17948	4.96462	7.43956
0.169931	0.054106	0.0665976	0.0951829		29.2177	24.0352	26.399		6.17116	4.94671	7.51904
0.170348	0.0547758	0.0668082	0.095193		29.2267	23.9875	26.4087		6.19632	4.95579	7.50026
0.170764	0.053862	0.0671659	0.0958084		29.0481	24.0068	26.4329		6.19227	4.97265	7.402
0.171181	0.0544185	0.0667685	0.0958374		29.0418	24.1495	26.4762		6.16936	4.97733	7.38532
0.171598	0.0539203	0.0665951	0.0958679		29.2806	24.0747	26.4654		6.16609	4.9677	7.61411
0.172014	0.0542063	0.066997	0.0946858		29.3138	24.0411	26.4699		6.18654	4.96463	7.33041
0.172431	0.0545378	0.0668003	0.0954491		29.6274	24.0202	26.52		6.16299	4.96017	7.4925
0.172848	0.0549267	0.0670593	0.0951061		29.3827	24.011	26.5777		6.18085	4.9548	7.46044
0.173264	0.0544742	0.0669164	0.0949229		29.4711	24.0094	26.4777		6.22866	4.94448	7.35168
0.173681	0.0549226	0.0666377	0.0950465		29.5307	24.0365	26.4469		6.22401	4.94016	7.44022
0.174098	0.0541816	0.0669902	0.0950568		29.2751	24.0834	26.4731		6.20016	4.9337	7.34326
0.174514	0.0544463	0.0670832	0.0953891		29.3231	24.0557	26.467		6.1789	4.94285	7.41395
0.174931	0.0545403	0.0671271	0.0951815		29.4698	24.0458	26.3745		6.20121	4.94017	7.48822
0.175348	0.0544525	0.067462	0.0952095		29.4421	24.0667	26.4749		6.18088	4.95904	7.53696
0.175764	0.0544404	0.0669136	0.0950738		29.6696	24.0202	26.5215		6.1538	4.97458	7.5108
0.176181	0.0544553	0.0673073	0.0955345		29.7043	23.9724	26.4958		6.16165	4.94492	7.44643
0.176598	0.0549625	0.0668925	0.0953089		29.8599	24.0229	26.5713		6.18333	4.94426	7.40511
0.177014	0.0544637	0.0670744	0.0953816		29.916	24.0407	26.6314		6.17834	4.9543	7.42095
0.177431	0.0543774	0.0672801	0.0958258		30.0688	24.0492	26.6268		6.1583	4.98017	7.40632
0.177848	0.0545745	0.0669204	0.0954473		29.6028	23.9709	26.6762		6.1655	4.98548	7.30291
0.178264	0.054367	0.0674189	0.0952401		29.4387	24.1647	26.7116		6.17369	4.9661	7.32587
0.178681	0.0544368	0.0668314	0.0953059		29.4535	24.1112	26.7531		6.19171	4.94786	7.3484
0.179098	0.0544497	0.0670063	0.0949274		29.568	24.0543	26.7411		6.16231	4.95702	7.40164
0.179514	0.0546083	0.0672557	0.095724		29.8089	24.0429	26.74		6.19371	4.95705	7.40067
0.179931	0.0547151	0.0669348	0.0954749		29.9083	24.1126	26.7093		6.18207	4.95295	7.38121
0.180348	0.0544433	0.066951	0.0957323		29.7981	24.1211	26.7639		6.18726	4.94901	7.38035
0.180764	0.0544941	0.0670473	0.0955894		30.1752	24.1408	26.8003		6.17554	4.92254	7.27235
0.181181	0.0541654	0.0672638	0.095111		30.0624	24.1009	26.8159		6.17415	4.93369	7.4963
0.181598	0.0551098	0.0669108	0.0953089		30.0895	24.1451	26.7895		6.20002	4.93942	7.51899
0.182014	0.0546352	0.0671145	0.0955748		30.2149	24.1594	26.7823		6.1408	4.94018	7.41839
0.182431	0.0544873	0.0670624	0.0954243		30.2408	24.2183	26.8209		6.15362	4.9449	7.39618
0.182848	0.0546922	0.0669979	0.0952901		30.4115	24.1484	26.8959		6.19102	4.96775	7.58206
0.183264	0.0546273	0.0670687	0.0953737		30.5664	24.1672	26.844		6.166	4.96026	7.57322
0.183681	0.0544201	0.0671582	0.0949563		30.719	24.2116	26.866		6.14086	4.96233	7.65199
0.184098	0.0546009	0.0666371	0.0950334		30.3193	24.1569	26.9156		6.16409	4.97912	7.43765
0.184514	0.0543951	0.0668961	0.0948392		30.506	24.1449	26.9355		6.18979	4.96087	7.46215
0.184931	0.0544974	0.0669049	0.094587		30.4146	24.1711	26.9442		6.17175	4.94353	7.40401
0.185348	0.0547238	0.0671519	0.0953364		30.4249	24.1604	26.9586		6.14055	4.93596	7.46789
0.185764	0.0545825	0.0670765	0.0953728		30.5557	24.1015	27.0332		6.15869	4.92768	7.48956
0.186181	0.0551167	0.0672389	0.094668		30.4188	24.1202	27.0104		6.16374	4.94532	7.47181
0.186598	0.054585	0.0668843	0.0950592		30.469	24.1692	26.9935		6.14337	4.94752	7.46712
0.187014	0.0545466	0.0665754	0.0947393		30.2464	24.1436	27.0139		6.12014	4.91604	7.42739
0.187431	0.0540798	0.0671762	0.0945948		30.4829	24.1661	27.0523		6.17067	4.9243	7.46856
0.187848	0.0540376	0.0670213	0.094806		30.6132	24.1864	27.0434		6.1862	4.93566	7.37967
0.188264	0.0541664	0.0667807	0.0949997		30.636	24.1159	27.1191		6.18767	4.94123	7.46809
0.188681	0.0546537	0.0671962	0.0951372		30.5706	24.0929	27.1114		6.16327	4.92972	7.5375
0.189098	0.0544677	0.0668274	0.0949775		30.7517	24.1886	27.0899		6.15991	4.93251	7.34936
0.189514	0.0540462	0.0668032	0.0954051		30.5143	24.1938	27.1138		6.173	4.94663	7.43365
0.189931	0.0543481	0.0670332	0.0945851		30.3052	24.1624	27.1309		6.13843	4.96185	7.52763
0.190348	0.0545255	0.0668568	0.095153		30.2916	24.1867	27.1511		6.13041	4.95848	7.41965
0.190764	0.0544708	0.0666718	0.0944655		30.6635	24.2562	27.1745		6.14616	4.93971	7.31542
0.191181	0.0548778	0.066766	0.0948747		30.6412	24.2152	27.1426		6.14924	4.93538	7.49156
0.191598	0.0547438	0.067007	0.0952492		30.7919	24.2786	27.2533		6.14518	4.95282	7.38013
0.192014	0.0541703	0.0669341	0.0948154		30.6391	24.1182	27.1737		6.15026	4.93321	7.47793
0.192431	0.0541207	0.0668794	0.0959834		30.8478	24.0951	27.1285		6.15735	4.91117	7.36013
0.192848	0.0539607	0.0670936	0.0957187		30.7934	24.2404	27.2406		6.17652	4.91937	7.30769
0.193264	0.0544143	0.0669171	0.0950526		30.9829	24.1959	27.2197		6.18693	4.94994	7.48459
0.193681	0.0547315	0.0667553	0.095236		30.7593	24.1815	27.2289		6.1473	4.94699	7.58937
0.194098	0.0543444	0.0668583	0.0947777		30.6165	24.1601	27.1499		6.13692	4.93192	7.51013
0.194514	0.0540605	0.0669765	0.0948598		30.8847	24.1903	27.2715		6.14053	4.93415	7.36792
0.194931	0.0546065	0.0667944	0.0948791		30.7944	24.2471	27.2453		6.14918	4.93328	7.48823
0.195348	0.0536939	0.0669645	0.0954325		30.8573	24.2826	27.2619		6.13823	4.94662	7.46399
0.195764	0.0542615	0.0669275	0.0948563		31.0886	24.2501	27.2942		6.1292	4.95815	7.52469
0.196181	0.0540869	0.0673733	0.0958813		31.2518	24.255	27.3256		6.16713	4.94402	7.39075
0.196598	0.0543958	0.0666569	0.0949727		30.953	24.2689	27.2841		6.15492	4.95174	7.4631
0.197014	0.054096	0.0672356	0.0951276		30.9697	24.1676	27.2259		6.16022	4.93781	7.40302
0.197431	0.0546859	0.066909	0.095338		31.153	24.1735	27.2164		6.16772	4.9492	7.38118
0.197848	0.0540973	0.067287	0.0952407		31.1951	24.1788	27.1685		6.15525	4.95863	7.29797
0.198264	0.0548504	0.066834	0.0956036		31.2278	24.1954	27.193		6.12037	4.97213	7.41115
0.198681	0.0542704	0.0670135	0.0958143		31.256	24.1871	27.2392		6.16408	4.95667	7.33575
0.199098	0.0543191	0.0670705	0.0959773		31.5178	24.1727	27.2681		6.14972	4.94557	7.22927
0.199514	0.0547233	0.0670874	0.0956096		31.153	24.2471	27.2961		6.16433	4.92164	7.31756
0.199931	0.0543466	0.0670635	0.0957679		31.2564	24.2666	27.3464		6.1795	4.93492	7.34038
0.200348	0.0549493	0.067321	0.0955823		31.4591	24.2872	27.3359		6.13706	4.95186	7.33515
0.200764	0.0546612	0.0671678	0.0952258		31.583	24.3581	27.3517		6.09182	4.94551	7.34955
0.201181	0.0542581	0.0669868	0.0959305		31.6519	24.2926	27.3568		6.11988	4.92411	7.42247
0.201598	0.0545808	0.0671227	0.0959101		31.6756	24.2642	27.3865		6.15933	4.91462	7.52979
0.202014	0.0549724	0.0671943	0.0958465		31.6737	24.2311	27.4024		6.13672	4.92794	7.38466
0.202431	0.0544078	0.0674387	0.0959498		31.829	24.2177	27.4502		6.11386	4.91812	7.33398
0.202848	0.0545696	0.0673835	0.0951048		31.8185	24.254	27.499		6.16042	4.91856	7.37555
0.203264	0.0544928	0.0673444	0.095972		31.6274	24.244	27.4857		6.18302	4.94618	7.4698
0.203681	0.0544199	0.0670859	0.0950639		31.8154	24.2471	27.5417		6.15322	4.93324	7.50599
0.204098	0.0544559	0.0672651	0.0954842		31.8462	24.222	27.6056		6.1333	4.9219	7.33722
0.204514	0.0540225	0.0671641	0.0952616		31.7069	24.2354	27.5284		6.12185	4.9215	7.28103
0.204931	0.0540243	0.067132	0.0949267		32.1348	24.2503	27.5096		6.14911	4.91739	7.30353
0.205348	0.0544317	0.0671326	0.095282		32.2557	24.29	27.5651		6.15163	4.91167	7.4268
0.205764	0.0540109	0.0672221	0.0955472		31.9642	24.3576	27.5552		6.16577	4.92805	7.36558
0.206181	0.0544493	0.0668708	0.0955951		31.9754	24.4172	27.569		6.18966	4.93138	7.12621
0.206598	0.0543608	0.0670172	0.095432		31.7234	24.3235	27.6112		6.14253	4.93231	7.09216
0.207014	0.054189	0.0676123	0.0953031		31.8957	24.3874	27.6664		6.12914	4.93286	7.34498
0.207431	0.0544141	0.0672778	0.0955691		31.9323	24.4005	27.637		6.11885	4.91582	7.4388
0.207848	0.0541038	0.0673541	0.0948793		31.9065	24.353	27.6404		6.15586	4.92184	7.28825
0.208264	0.0546655	0.0673994	0.0953601		32.0169	24.2992	27.6416		6.11489	4.90159	7.18166
0.208681	0.0545072	0.0673188	0.0957147		32.0941	24.3248	27.6753		6.10426	4.90631	7.24403
0.209098	0.0548042	0.0670734	0.0952648		32.2743	24.3002	27.7068		6.12884	4.91023	7.33045
0.209514	0.0546191	0.0671508	0.0951897		32.3038	24.2817	27.7052		6.16398	4.9411	7.26287
0.209931	0.0545994	0.0674411	0.0954563		32.1625	24.2815	27.7232		6.13159	4.94942	7.27039
0.210348	0.0545109	0.067131	0.0953883		32.3207	24.2793	27.7686		6.14457	4.94678	7.40292
0.210764	0.0548073	0.067403	0.0946306		32.6875	24.4014	27.746		6.147	4.92365	7.33953
0.211181	0.0548582	0.0671951	0.0952958		32.4901	24.3069	27.7554		6.14174	4.9212	7.37777
0.211598	0.054721	0.0672897	0.0951595		32.4859	24.2953	27.7429		6.10041	4.94557	7.32534
0.212014	0.0548612	0.0671589	0.0953124		32.6995	24.2403	27.7758		6.11426	4.91042	7.32244
0.212431	0.0544535	0.06743	0.0952467		32.4695	24.2233	27.8005		6.12114	4.93212	7.2836
0.212848	0.0546394	0.0675166	0.0951763		32.6508	24.2734	27.812		6.06757	4.94266	7.25464
0.213264	0.0543913	0.0672783	0.0949936		32.62	24.2544	27.8587		6.05229	4.92836	7.32047
0.213681	0.0544085	0.067069	0.0950172		32.5888	24.3555	27.8472		6.05841	4.94337	7.39722
0.214098	0.0542759	0.0672899	0.0952795		32.5782	24.3592	27.8988		6.06635	4.94885	7.29718
0.214514	0.0543581	0.0672099	0.0949145		32.6581	24.4458	27.8997		6.07694	4.93857	7.23986
0.214931	0.0546957	0.067409	0.0951709		32.7605	24.351	27.9003		6.06171	4.92887	7.33636
0.215348	0.0546468	0.0671809	0.0946855		32.8137	24.2716	27.9432		6.10421	4.93675	7.35715
0.215764	0.054655	0.0667834	0.0947921		32.8046	24.2794	27.9998		6.09133	4.93633	7.36542
0.216181	0.054419	0.0675329	0.0948606		32.7192	24.3195	28.0802		6.05852	4.90711	7.2879
0.216598	0.0550958	0.0669646	0.0947563		32.867	24.2947	28.03		6.05274	4.91381	7.26862
0.217014	0.0542331	0.0673624	0.0947493		32.9634	24.2931	28.0823		6.05961	4.93436	7.25776
0.217431	0.0544485	0.067133	0.0951124		33.0453	24.3154	28.1355		6.08433	4.95631	7.33518
0.217848	0.0546544	0.0672664	0.0945312		33.1422	24.3386	28.1101		6.08459	4.94972	7.52348
0.218264	0.0545688	0.0669108	0.0947743		33.2707	24.2481	28.1055		6.09622	4.97147	7.51087
0.218681	0.0541856	0.0672409	0.0947186		32.9426	24.2624	28.1514		6.13616	4.95378	7.45885
0.219098	0.0542391	0.0674507	0.0953103		33.2968	24.2863	28.2096		6.10479	4.92897	7.63274
0.219514	0.0544453	0.0674127	0.0950985		33.1955	24.2876	28.145		6.08409	4.93453	7.45135
0.219931	0.0544932	0.0673431	0.094817		32.9336	24.3836	28.1693		6.07691	4.93026	7.30277
0.220348	0.0541321	0.0670895	0.0947692		33.3648	24.3712	28.1486		6.11811	4.92511	7.24647
0.220764	0.0544959	0.0671004	0.0948678		33.4393	24.3959	28.1269		6.10708	4.95273	7.34938
0.221181	0.0545243	0.0670499	0.094782		33.1788	24.4671	28.0673		6.08818	4.96456	7.36842
0.221598	0.0544828	0.0673584	0.0946523		33.2447	24.3446	28.0951		6.11983	4.95164	7.34915
0.222014	0.0543825	0.067163	0.0949164		33.3058	24.3452	28.0813		6.09907	4.95565	7.40381
0.222431	0.0544177	0.067343	0.0947966		33.501	24.2657	28.0569		6.0771	4.95379	7.35354
0.222848	0.0544664	0.0673014	0.0946133		33.5119	24.2442	28.0594		6.06824	4.9523	7.35433
0.223264	0.0546663	0.0672309	0.0948803		33.6103	24.2858	28.0084		6.1545	4.93959	7.35244
0.223681	0.0545306	0.0671963	0.0949173		33.6923	24.3605	28.0437		6.10813	4.92862	7.17043
0.224098	0.0546089	0.0671128	0.0949874		33.5908	24.3394	28.1125		6.09266	4.91794	7.2807
0.224514	0.0537231	0.0673034	0.0951972		33.5662	24.304	28.107		6.10146	4.91708	7.22182
0.224931	0.0543933	0.0675108	0.0953232		33.5695	24.4341	28.2083		6.14439	4.90559	7.25869
0.225348	0.0544997	0.0671014	0.0951121		33.6246	24.5027	28.2213		6.1032	4.91557	7.4146
0.225764	0.0539035	0.0674385	0.0953558		33.61	24.5959	28.2407		6.09443	4.92195	7.29834
0.226181	0.0540127	0.0675472	0.0949343		33.5428	24.5468	28.2631		6.09724	4.93309	7.27286
0.226598	0.0540813	0.0670955	0.0944837		33.6311	24.4489	28.2974		6.09998	4.93177	7.34576
0.227014	0.0543494	0.0674111	0.0950566		33.7586	24.5074	28.2284		6.07669	4.93584	7.32885
0.227431	0.054532	0.0675023	0.0948711		33.694	24.484	28.2822		6.14619	4.91735	7.32795
0.227848	0.0543191	0.0670626	0.0947462		33.6534	24.555	28.2858		6.14716	4.91579	7.27073
0.228264	0.0544306	0.0674039	0.0947521		33.8425	24.5936	28.3363		6.08734	4.92352	7.3647
0.228681	0.0542599	0.0670025	0.0950881		33.6032	24.5157	28.3915		6.09473	4.89134	7.30709
0.229098	0.0544508	0.0674653	0.0947932		34.1869	24.4519	28.4026		6.15163	4.90611	7.28833
0.229514	0.0544639	0.0677086	0.0949383		34.0032	24.5386	28.3199		6.09155	4.91512	7.29522
0.229931	0.0537982	0.0674697	0.0951656		34.0175	24.5438	28.3191		6.06583	4.92978	7.3536
0.230348	0.0540372	0.0671999	0.0950084		34.1071	24.4834	28.334		6.12624	4.93839	7.32348
0.230764	0.0545729	0.0674777	0.0947674		34.0094	24.494	28.3688		6.12718	4.94414	7.34461
0.231181	0.0543931	0.0673797	0.0949554		34.2135	24.4454	28.3687		6.11315	4.9495	7.51464
0.231598	0.0542256	0.0672046	0.0945582		34.3764	24.4606	28.4471		6.09071	4.94665	7.5407
0.232014	0.0543345	0.0678841	0.0954693		34.4678	24.4382	28.4452		6.06535	4.93545	7.47771
0.232431	0.0539323	0.0671293	0.0950359		34.0926	24.4289	28.523		6.08941	4.95073	7.32681
0.232848	0.0547678	0.0676431	0.0952334		34.1872	24.4628	28.543		6.09371	4.94137	7.171
0.233264	0.0543213	0.0674043	0.0947343		34.3637	24.4839	28.4956		6.05864	4.93522	7.04871
0.233681	0.054374	0.0676097	0.0952259		34.3564	24.5278	28.474		6.08876	4.93929	7.16827
0.234098	0.054242	0.0676562	0.0956161		34.4167	24.5251	28.4877		6.08884	4.93014	7.16284
0.234514	0.0543772	0.067311	0.0948527		34.5801	24.529	28.5328		6.07876	4.92557	7.32396
0.234931	0.0542114	0.0671926	0.0956445		34.5449	24.5957	28.5702		6.05861	4.92953	7.45054
0.235348	0.0545004	0.0675707	0.095052		34.5248	24.6505	28.4928		6.061	4.9328	7.27119
0.235764	0.054653	0.067222	0.0954603		34.476	24.5587	28.5207		6.03888	4.92308	7.37985
0.236181	0.05445	0.0677766	0.0952574		34.6512	24.541	28.5589		6.05294	4.90485	7.29275
0.236598	0.0542909	0.0672425	0.0956854		34.7121	24.507	28.5095		6.08415	4.91086	7.33904
0.237014	0.0541016	0.067461	0.0956532		34.9244	24.6076	28.7227		6.04022	4.9205	7.1901
0.237431	0.0546663	0.0676085	0.0954708		34.686	24.5694	32.991		6.01618	4.91187	7.15257
0.237848	0.0541612	0.0676019	0.0959645		34.72	24.5678	35.0268		6.04323	4.91056	7.29134
0.238264	0.0545349	0.0673363	0.0956775		34.8639	24.5732	35.882		6.05288	4.92316	7.35097
0.238681	0.0541231	0.0673903	0.0960855		34.8696	24.5307	35.6714		6.05387	4.92169	7.309
0.239098	0.0544343	0.0675173	0.0952037		34.8268	24.5394	35.5241		6.04554	4.914	7.21337
0.239514	0.0546583	0.0676633	0.0956689		35.2951	24.5342	35.4955		6.05905	4.89455	7.18973
0.239931	0.0545658	0.0675146	0.0957704		35.1043	24.4197	35.3665		6.0769	4.92186	7.3225
0.240348	0.0544843	0.0674926	0.0956552		35.2174	24.5009	34.9974		6.06783	4.91559	7.38358
0.240764	0.0544519	0.0676767	0.0950656		35.084	24.5787	35.0011		6.0504	4.91046	7.28034
0.241181	0.0543927	0.0677038	0.095274		35.1291	24.551	35.0598		6.0521	4.92289	7.40499
0.241598	0.0545651	0.0677225	0.0951091		35.0614	24.5316	34.8878		6.08667	4.93483	7.45726
0.242014	0.0546234	0.067729	0.0950847		35.4271	24.545	34.8931		6.1025	4.95546	7.47011
0.242431	0.0546324	0.0678164	0.0952107		35.4754	24.6346	34.9143		6.0521	4.93106	7.35496
0.242848	0.0546028	0.0672264	0.0958061		35.2901	24.6067	34.8031		6.05963	4.92232	7.28368
0.243264	0.0545838	0.0676788	0.0949805		35.2194	24.5499	35.1788		6.07813	4.91622	7.37443
0.243681	0.055341	0.0674547	0.0957583		35.4601	24.4805	34.8687		6.07607	4.94695	7.3555
0.244098	0.0543566	0.0676237	0.0957579		35.3729	24.5055	34.608		6.07577	4.93284	7.20289
0.244514	0.0543876	0.0677287	0.0953101		35.5541	24.6126	34.3302		6.08397	4.93889	7.34298
0.244931	0.0544461	0.068087	0.0948142		35.4646	24.6455	34.1904		6.09385	4.92291	7.4048
0.245348	0.054877	0.0675513	0.0951416		35.7409	24.5646	34.3328		6.05926	4.92584	7.3743
0.245764	0.0546015	0.067947	0.0952561		35.5502	24.6172	33.9703		6.05432	4.93385	7.0771
0.246181	0.0544988	0.0676092	0.0950237		35.5484	24.6142	33.8104		6.10354	4.92292	7.22875
0.246598	0.0546299	0.0675354	0.0956165		35.6242	24.585	34.1323		6.06435	4.94048	7.2534
0.247014	0.0547801	0.0674135	0.0949421		35.5514	24.5671	34.0069		6.06842	4.91446	7.33844
0.247431	0.0545725	0.0680416	0.0955802		35.6681	24.6289	34.0421		6.06717	4.89623	7.38099
0.247848	0.0544443	0.0675902	0.095083		35.8326	24.5654	34.0102		6.06914	4.91033	7.34962
0.248264	0.0546938	0.0676301	0.0953889		35.8294	24.6226	33.9449		6.05511	4.92118	7.26962
0.248681	0.0548202	0.0674902	0.0956878		35.6843	24.6514	34.0021		6.03681	4.9139	7.35815
0.249098	0.0550727	0.0673537	0.0950935		35.7594	24.6409	33.9611		6.05921	4.92003	7.39321
0.249514	0.054828	0.0676243	0.0957076		35.8399	24.5935	33.8488		6.09274	4.93416	7.32636
0.249931	0.0548102	0.0671502	0.0953834		35.9773	24.5957	33.7199		6.10386	4.93369	7.23139
0.250348	0.0546411	0.0676933	0.0952429		35.9214	24.5833	33.8847		6.09475	4.89745	7.15688
0.250764	0.0544959	0.0674948	0.0952448		36.0352	24.5789	33.9389		6.09158	4.90634	7.26038
0.251181	0.0547627	0.0674729	0.0949276		36.1108	24.6382	34.0509		6.08112	4.91823	7.14992
0.251598	0.0541343	0.0675971	0.0948537		36.2953	24.5904	33.6419		6.09133	4.92155	7.27242
0.252014	0.0544991	0.0678016	0.0947073		35.9525	24.6199	33.8609		6.08281	4.9015	7.34428
0.252431	0.0550627	0.0670994	0.0950188		36.1136	24.643	33.6833		6.09418	4.92162	7.23561
0.252848	0.0540674	0.0674675	0.0949898		35.9252	24.6033	33.8289		6.06197	4.93567	7.24561
0.253264	0.0547824	0.0675483	0.0950493		36.5551	24.6136	33.8735		6.04113	4.91802	7.2673
0.253681	0.0544421	0.0674309	0.0945086		36.5544	24.6423	33.7176		6.07441	4.91302	7.37515
0.254098	0.0550591	0.0674893	0.0954656		36.6799	24.6064	33.6203		6.10664	4.9134	7.33437
0.254514	0.0546066	0.0674825	0.0950156		36.5912	24.6414	33.4777		6.06698	4.9131	7.21904
0.254931	0.0546832	0.0673197	0.0948096		36.3625	24.6353	33.5463		6.07761	4.89984	7.11783
0.255348	0.0544447	0.0673886	0.0948282		36.3421	24.542	33.2435		6.10525	4.92509	7.26203
0.255764	0.0546023	0.0679123	0.0948434		36.7855	24.6522	33.5446		6.06511	4.93841	7.36259
0.256181	0.0543383	0.0672829	0.0945314		36.7686	24.5486	33.4233		6.06322	4.92506	7.25079
0.256598	0.0542382	0.0674382	0.0947271		36.6316	24.5744	33.2656		6.09089	4.90746	7.13305
0.257014	0.054684	0.0675219	0.0956275		36.924	24.5643	33.2006		6.07219	4.90467	7.33887
0.257431	0.0550698	0.0672566	0.09547		36.9593	24.6344	33.2679		6.09099	4.91674	7.22337
0.257848	0.053956	0.0669514	0.0949119		36.8921	24.6372	33.178		6.10119	4.90003	7.23247
0.258264	0.0543281	0.067238	0.0949215		36.6907	24.623	33.2141		6.1024	4.9055	7.28097
0.258681	0.0541777	0.067362	0.094824		36.9307	24.6904	33.2374		6.08321	4.90272	7.36683
0.259098	0.0544139	0.0669681	0.0956388		36.8592	24.6757	33.4394		6.10152	4.90295	7.36921
0.259514	0.0544056	0.0671674	0.0949886		37.0193	24.5816	33.146		6.12046	4.91261	7.20969
0.259931	0.0541578	0.0674924	0.0950168		37.1575	24.5389	33.3724		6.11982	4.89713	7.35211
0.260348	0.0542153	0.0672528	0.0944176		37.1963	24.5685	33.357		6.06872	4.88665	7.28628
0.260764	0.0541905	0.0674952	0.095161		37.3716	24.6278	33.1678		6.08816	4.90402	7.16674
0.261181	0.0544749	0.0671437	0.0950953		37.4525	24.6577	33.2849		6.06168	4.92138	7.22222
0.261598	0.0544158	0.0673298	0.0952949		37.3024	24.6887	33.295		6.054	4.92218	7.21202
0.262014	0.0542203	0.0673438	0.0950981		37.4411	24.7296	33.3387		6.04983	4.9063	7.16457
0.262431	0.0540447	0.0675375	0.0948755		37.153	24.7091	33.1593		6.06874	4.90803	7.12211
0.262848	0.0546252	0.0671238	0.0948479		37.3249	24.7225	33.2998		6.06241	4.89479	7.11269
0.263264	0.0538199	0.0675896	0.0946301		37.5859	24.6866	33.1049		6.04818	4.89037	7.30051
0.263681	0.0548436	0.0674965	0.0948607		37.6418	24.787	33.3691		6.05941	4.89152	7.18374
0.264098	0.0544154	0.0675364	0.0945038		37.4026	24.7191	33.3244		6.06213	4.90919	7.13838
0.264514	0.0537834	0.0675642	0.0950097		37.5129	24.6638	33.2875		6.05696	4.90448	7.18452
0.264931	0.0542342	0.067674	0.0941887		37.6533	24.6818	32.9777		6.05068	4.90196	7.35625
0.265348	0.0544271	0.0679597	0.0948869		37.7551	24.6425	33.1648		6.05625	4.90956	7.30581
0.265764	0.054244	0.0672135	0.0947514		37.9947	24.7482	33.0291		6.07825	4.90071	7.24991
0.266181	0.0544196	0.0675385	0.0942093		38.151	24.6894	32.9774		6.05453	4.88805	7.29386
0.266598	0.0543335	0.0677999	0.0943982		38.0503	24.7485	33.1819		6.05439	4.89181	7.34416
0.267014	0.0543214	0.0675668	0.094396		37.9641	24.6459	33.0348		6.04223	4.88714	7.30762
0.267431	0.0544113	0.0676508	0.0946985		37.7036	24.5788	33.088		6.0308	4.90652	7.20132
0.267848	0.0547181	0.0676995	0.0943947		37.6199	24.7626	33.1145		6.0104	4.91252	7.11305
0.268264	0.0543519	0.0675716	0.094403		38.0204	24.7739	32.8181		6.02709	4.90211	7.27795
0.268681	0.0543623	0.067579	0.094684		38.0794	24.7126	32.9885		6.03546	4.90451	7.27442
0.269098	0.0545413	0.0673434	0.0951387		38.1303	24.7477	33.1985		6.03594	4.90214	7.29547
0.269514	0.0541386	0.0675053	0.0952993		38.169	24.7097	33.2801		6.01992	4.88595	7.1999
0.269931	0.05446	0.0676302	0.0950174		38.2341	24.7158	32.9154		6.00108	4.90307	7.1515
0.270348	0.0544369	0.0675015	0.0954149		38.1989	24.7538	33.0763		6.00811	4.91147	7.25181
0.270764	0.0543166	0.0677292	0.0953399		38.1281	24.7191	33.0138		6.03727	4.92504	7.29052
0.271181	0.0550157	0.0676276	0.0951725		38.3661	24.6405	32.9497		6.04629	4.91469	7.12197
0.271598	0.0549973	0.0673856	0.0953586		38.0749	24.6304	32.9341		6.02342	4.88124	7.27821
0.272014	0.0544352	0.0675499	0.0952691		38.5444	24.6486	33.099		6.01102	4.88429	7.26796
0.272431	0.0545978	0.0679144	0.0946041		38.3984	24.6215	32.8998		6.01567	4.90673	7.41785
0.272848	0.0546608	0.0675592	0.0953694		38.3917	24.6042	32.8016		6.01753	4.89178	7.1907
0.273264	0.0548222	0.0679474	0.0949611		38.5053	24.708	32.7998		6.03345	4.90155	7.05851
0.273681	0.0541731	0.0673145	0.0949618		38.5849	24.6828	32.9962		6.03253	4.91696	7.2894
0.274098	0.0546269	0.0677615	0.0943605		38.631	24.7594	33.2374		6.05043	4.9005	7.25992
0.274514	0.0542247	0.0681159	0.094136		38.6159	24.7716	32.9205		6.05816	4.88723	7.40152
0.274931	0.0544946	0.0677429	0.0947631		38.6665	24.68	33.306		6.05631	4.90987	7.30401
0.275348	0.0550612	0.0676416	0.0949248		38.5059	24.7028	32.9003		6.02551	4.90179	7.41701
0.275764	0.0541887	0.0674857	0.094446		38.7574	24.7136	33.0503		6.02436	4.88995	7.22987
0.276181	0.0549714	0.0672693	0.0943428		38.9549	24.6472	33.0752		6.03492	4.89564	7.27817
0.276598	0.0544906	0.0676894	0.094759		38.9933	24.6795	33.0803		6.05264	4.90216	7.2631
0.277014	0.0547208	0.0676974	0.0950589		39.2303	24.7185	32.9518		6.03809	4.89523	7.27008
0.277431	0.0542475	0.0675644	0.0945542		39.1521	24.7646	33.1963		6.0501	4.91788	7.27932
0.277848	0.0541308	0.0679097	0.094509		39.0488	24.7422	32.9689		6.02786	4.93463	7.19059
0.278264	0.0548169	0.0676223	0.0946333		39.0322	24.731	32.9544		6.01345	4.93742	7.02957
0.278681	0.054311	0.0678519	0.0946636		39.4224	24.7576	32.8906		6.01705	4.92607	7.33889
0.279098	0.0547511	0.0673473	0.0943907		39.25	24.7701	33.0943		6.03812	4.91632	7.43902
0.279514	0.0548395	0.0679246	0.094883		39.2354	24.7723	33.0726		6.01975	4.91061	7.28447
0.279931	0.0544783	0.0675864	0.0942939		39.5817	24.7172	33.2301		6.03918	4.90683	7.28842
0.280348	0.0543343	0.0675347	0.0948354		39.6797	24.7596	33.3034		6.02795	4.88804	7.375
0.280764	0.0546505	0.0677425	0.0952927		39.4867	24.8531	32.8477		6.04129	4.87932	7.21135
0.281181	0.0541903	0.067789	0.0944461		39.6862	24.8855	33.3505		6.04632	4.88367	7.16966
0.281598	0.0544408	0.0676917	0.0944301		39.611	24.8647	33.3567		6.03298	4.881	7.40273
0.282014	0.054122	0.0675273	0.0942364		39.6715	24.8257	33.2462		6.03969	4.89627	7.44926
0.282431	0.0543971	0.0675217	0.0947946		39.8597	24.7386	32.8917		6.00442	4.90633	7.3434
0.282848	0.0541732	0.0677852	0.0943657		39.6811	24.8616	32.992		6.03778	4.91221	7.33922
0.283264	0.0545381	0.0679	0.0949762		39.7596	24.7567	32.9193		6.07331	4.89363	7.25574
0.283681	0.0544023	0.0675987	0.0952224		39.8289	24.7931	32.7147		6.05226	4.90284	7.26582
0.284098	0.0540759	0.0677773	0.0943871		39.6435	24.8075	32.7603		6.04681	4.90287	7.2281
0.284514	0.0539537	0.0672669	0.0950359		39.6615	24.7386	32.6754		6.02462	4.88352	7.04751
0.284931	0.0545086	0.0674979	0.0949403		39.9197	24.7296	32.7174		6.03129	4.86409	7.1477
0.285348	0.0543567	0.0677659	0.0943773		39.9887	24.7224	33.092		6.02048	4.88339	7.26481
0.285764	0.0545728	0.0674838	0.0950777		39.832	24.7837	32.9791		6.02708	4.90392	7.15752
0.286181	0.0545617	0.0674228	0.094152		40.1559	24.7531	33.1399		6.05718	4.91129	7.34121
0.286598	0.0546011	0.067635	0.094384		40.2658	24.7621	33.1179		6.05814	4.91441	7.0982
0.287014	0.0542252	0.0675511	0.0941615		40.0176	24.7192	33.1698		6.0426	4.91814	7.09668
0.287431	0.05463	0.0677515	0.0940884		40.3169	24.8144	33.2526		6.06494	4.89669	7.07099
0.287848	0.0541795	0.0672706	0.0944754		40.7068	24.841	32.9038		6.06841	4.87711	7.12559
0.288264	0.0542626	0.0674915	0.0941093		40.3442	24.8132	32.9812		6.03714	4.88995	7.22511
0.288681	0.0546398	0.0674535	0.094484		40.318	24.815	33.2039		6.00458	4.88121	7.15558
0.289098	0.0542165	0.0674429	0.0943872		40.4342	24.759	32.8569		6.01804	4.86737	7.28299
0.289514	0.0540372	0.067532	0.0946993		40.8255	24.776	32.9631		6.01956	4.86961	7.2671
0.289931	0.054371	0.0675817	0.0949155		40.8468	24.8569	33.0979		6.01541	4.88084	7.18846
0.290348	0.0547119	0.0675578	0.0951198		40.8113	24.7891	33.1436		6.01495	4.87766	7.35444
0.290764	0.0545589	0.0677833	0.0946223		40.7978	24.75	32.9273		6.02136	4.88389	7.25647
0.291181	0.0545754	0.0676157	0.0949247		40.7492	24.7639	32.9675		6.03252	4.89147	7.25507
0.291598	0.0546641	0.06841	0.0947582		40.7447	24.8175	32.6726		6.02851	4.90891	7.28861
0.292014	0.0541896	0.0677452	0.0949768		41.0593	24.8269	32.8732		6.04955	4.88811	7.29855
0.292431	0.0545872	0.0678589	0.0944018		41.2282	24.8078	33.0798		6.05423	4.89084	7.25148
0.292848	0.0544402	0.0676556	0.0943162		41.1164	24.8409	33.3192		6.04727	4.9021	7.36837
0.293264	0.0541466	0.0676837	0.0947703		41.0675	24.8676	32.9661		6.05169	4.88958	7.30451
0.293681	0.0546869	0.0677379	0.0944701		41.3164	24.8345	32.7866		6.02579	4.8838	7.21213
0.294098	0.0538575	0.067478	0.0942699		41.0438	24.7739	32.9302		6.02696	4.89331	7.21765
0.294514	0.0547165	0.0675587	0.0950254		41.4438	24.7802	33.0541		6.02404	4.89672	7.12446
0.294931	0.0541934	0.0678947	0.0943904		41.3852	24.8155	33.0055		6.02322	4.88962	7.08289
0.295348	0.0547373	0.0678287	0.0958384		41.4476	24.7965	33.1205		6.02659	4.88992	6.95173
0.295764	0.0544171	0.0679155	0.0957426		41.647	24.9003	33.3155		6.02641	4.89604	7.18968
0.296181	0.0542869	0.0678205	0.0955584		41.4878	24.8565	33.1362		6.03294	4.8979	7.21586
0.296598	0.0542008	0.0677279	0.0954236		41.4826	24.8423	33.0342		6.01654	4.8934	7.1844
0.297014	0.0542169	0.0677918	0.095483		41.6284	24.8503	33.013		6.01029	4.91697	7.23273
0.297431	0.0545039	0.0679665	0.0955987		41.6818	24.7402	33.0046		6.0011	4.92214	7.17194
0.297848	0.0545482	0.0676251	0.0958156		41.8966	24.8437	33.273		5.97805	4.90729	7.17327
0.298264	0.054086	0.0679859	0.0959085		42.003	24.9387	33.4706		5.99807	4.89518	7.22868
0.298681	0.0545928	0.0679999	0.095441		41.9181	24.8661	33.1322		5.99374	4.89269	7.27803
0.299098	0.0548426	0.068127	0.0950572		41.6944	24.8783	33.2272		5.99154	4.88736	7.17155
0.299514	0.0542975	0.0678572	0.0959731		41.9849	24.8433	33.3044		5.98683	4.90091	7.21713
0.299931	0.0545704	0.0684493	0.0954912		42.0932	24.81	33.2707		5.97253	4.91386	7.29798
0.300348	0.0546734	0.0680128	0.0958128		42.1215	24.8033	33.1867		6.242	4.90347	7.15556
0.300764	0.0543212	0.0680287	0.0955465		42.0386	24.7854	33.2232		8.58812	4.80988	7.15122
0.301181	0.0545049	0.0683257	0.0960206		42.07	24.853	33.2951		8.89074	4.79215	7.1508
0.301598	0.0541553	0.0679259	0.0949659		41.9924	24.7703	33.1759		8.96359	5.37225	7.14194
0.302014	0.0549845	0.0682938	0.0961046		42.136	24.7019	32.8561		8.80644	5.47135	7.14173
0.302431	0.0543367	0.0680488	0.09533		42.2048	24.6061	32.5322		8.68548	5.43859	7.86554
0.302848	0.0546427	0.0681898	0.0953581		42.1388	24.5247	32.7335		8.54254	5.34623	8.64557
0.303264	0.0539549	0.0681058	0.0956104		65.2695	24.5463	32.6043		8.65763	5.28294	8.71882
0.303681	0.0547026	0.0679292	0.0958206		48.685	24.3888	32.6659		8.53986	5.23162	8.531
0.304098	0.0547126	0.068075	0.0954645		46.0765	24.2332	32.8735		8.49037	5.16064	8.45137
0.304514	0.0547771	0.0680718	0.0951642		45.0595	24.0922	33.5397		8.54141	5.16833	8.51218
0.304931	0.0545336	0.0680658	0.0956759		44.3558	24.2816	33.0332		8.52342	5.17101	8.52395
0.305348	0.0549721	0.067744	0.0963498		44.0491	24.3284	32.6069		8.56389	5.16735	8.55858
0.305764	0.0547281	0.0681402	0.0956749		43.931	24.2407	32.6376		8.58944	5.0779	8.48616
0.306181	0.0541879	0.0684729	0.0956967		43.7643	24.0239	32.4647		8.52292	5.01935	8.74916
0.306598	0.0545713	0.06816	0.0954556		43.6835	24.1339	32.5966		8.44934	4.99096	8.43859
0.307014	0.0554054	0.0678522	0.0957591		43.5027	24.0182	32.551		8.38701	5.0003	8.2033
0.307431	0.0541137	0.0678729	0.0959934		43.5238	23.9019	32.315		8.46483	4.94913	8.0661
0.307848	0.0544837	0.0680273	0.0956285		43.4791	23.7572	32.0984		8.31258	4.95145	7.93651
0.308264	0.0547809	0.0679848	0.0956923		43.4443	23.7764	32.2162		8.3854	4.93493	8.00877
0.308681	0.0551454	0.0680651	0.0957399		43.4544	23.7319	31.9363		8.2863	4.93155	8.34233
0.309098	0.0544633	0.0679711	0.09579		43.4624	23.9812	32.0089		8.33753	4.8908	8.28994
0.309514	0.0550562	0.0678322	0.0957468		43.3707	23.9471	32.0153		8.28992	4.88542	8.39433
0.309931	0.0547328	0.0680284	0.0953872		43.4474	23.8662	32.2433		8.27009	4.90184	8.11429
0.310348	0.0545309	0.0678903	0.0957802		43.4215	24.069	32.5406		8.21779	4.8307	8.16302
0.310764	0.0545675	0.0679852	0.0954833		43.3295	23.9058	32.3152		8.18686	4.80933	8.05513
0.311181	0.0548335	0.0677907	0.0954558		43.4045	23.8411	32.6191		8.26496	4.80705	8.25594
0.311598	0.0542081	0.0679553	0.0949918		43.38	24.0813	32.5137		8.24791	4.81184	8.08504
0.312014	0.0547405	0.0675228	0.0953805		43.3798	23.8701	32.5256		8.24026	4.78934	8.0712
0.312431	0.0548372	0.0677443	0.0958871		43.4041	23.6739	32.2647		8.18766	4.79177	8.12774
0.312848	0.0543402	0.0677729	0.0952195		43.3499	23.8872	32.3577		8.19496	4.76306	8.15953
0.313264	0.0544718	0.0681497	0.0956611		43.373	23.9447	32.0315		8.20263	4.73698	8.09889
0.313681	0.0546705	0.0680852	0.0952571		43.4333	23.8541	32.0067		8.22637	4.7274	8.11372
0.314098	0.0541276	0.067934	0.0954996		43.4364	23.687	31.9917		8.21853	4.72684	8.03607
0.314514	0.0542848	0.067765	0.0953251		43.4651	23.5677	32.2003		8.16744	4.67462	8.01014
0.314931	0.0546128	0.0674706	0.0947201		43.4554	23.6502	32.4261		8.17419	4.7451	8.09198
0.315348	0.0546261	0.0677544	0.095316		43.5714	23.6855	32.6587		8.12506	4.7365	8.04356
0.315764	0.0545669	0.0680569	0.0944673		43.6072	23.8969	32.0885		8.09229	4.74394	8.04548
0.316181	0.0540521	0.0679113	0.0948789		43.5836	23.7116	32.1987		8.0763	4.78678	8.08305
0.316598	0.054531	0.0683177	0.0948157		43.6675	23.6977	32.2328		8.07923	4.77778	8.03088
0.317014	0.0542448	0.0679328	0.094399		43.6219	23.6363	32.1759		8.08402	4.79153	7.97303
0.317431	0.0545576	0.0678854	0.0950854		43.6657	23.7671	32.3755		8.11437	4.81582	8.19824
0.317848	0.0544441	0.0679751	0.0947605		43.7228	23.7313	32.5284		8.13038	4.76663	8.03944
0.318264	0.0542581	0.0678408	0.0955449		43.8156	23.6162	32.2241		8.10448	4.71397	7.91969
0.318681	0.0545596	0.0679093	0.0956117		43.7618	23.7265	32.2334		8.08574	4.81389	7.86634
0.319098	0.0544287	0.0679407	0.0949685		43.8971	23.6088	32.2216		8.02286	4.751	7.77134
0.319514	0.0543584	0.0679298	0.0954479		43.901	23.6155	32.2813		8.00384	4.72631	8.27986
0.319931	0.0545717	0.0677956	0.0952203		43.935	23.38	32.2327		8.00154	4.71354	8.21988
0.320348	0.0547285	0.067863	0.0952268		44.0167	23.6603	32.1241		7.93356	4.67223	8.16905
0.320764	0.0543256	0.0680792	0.0958271		44.0181	23.6147	32.2424		7.95538	4.64118	8.17299
0.321181	0.0545111	0.0680348	0.0950199		44.0123	23.6261	32.4909		7.95491	4.67878	8.29194
0.321598	0.0539811	0.0679912	0.0953449		44.1687	23.4194	32.5106		7.98241	4.72903	7.95065
0.322014	0.0540697	0.0679704	0.0956242		44.2399	23.417	32.5269		7.9823	4.70212	7.87155
0.322431	0.0543758	0.0678827	0.0953019		44.2283	23.7167	32.1854		7.94749	4.73615	7.89991
0.322848	0.0546322	0.067834	0.0961145		44.2771	23.4457	32.2503		7.91732	4.72139	8.02651
0.323264	0.054593	0.0679486	0.0951781		44.3331	23.4733	32.318		7.86029	4.65306	8.09133
0.323681	0.0543392	0.068098	0.0956722		44.3994	23.5363	32.3057		7.89419	4.63426	8.06194
0.324098	0.0545639	0.0679063	0.0955705		44.4442	23.5918	32.0841		7.84051	4.68775	8.0696
0.324514	0.0545345	0.0683294	0.0952357		44.4406	23.3949	31.9893		7.80501	4.67743	7.71205
0.324931	0.0545636	0.0680145	0.0952519		44.4778	23.5064	31.9979		7.82866	4.63023	7.94644
0.325348	0.0542201	0.068118	0.0950087		44.5668	23.7472	32.2815		7.81611	4.70254	7.94659
0.325764	0.0543599	0.0681279	0.0950664		44.6856	23.5726	32.2771		7.84186	4.67075	7.7679
0.326181	0.0549164	0.0679989	0.0952955		44.7046	23.7895	32.1716		7.92749	4.62947	7.94266
0.326598	0.0544895	0.0679264	0.0954858		44.7472	24.1977	32.3818		7.89571	4.65356	7.68522
0.327014	0.0546894	0.0680078	0.0951541		44.7919	23.8729	32.4463		7.84574	4.65565	7.7445
0.327431	0.054591	0.0681498	0.0952506		44.8046	23.6453	32.1809		7.85244	4.59563	7.92677
0.327848	0.0548413	0.0681085	0.0953035		44.8857	23.6471	32.162		7.76478	4.62834	7.85441
0.328264	0.0543453	0.0678518	0.0946187		44.8973	23.7804	32.2044		7.88949	4.67159	7.75323
0.328681	0.0544383	0.0682861	0.0944867		45.0567	23.6219	32.2968		7.84592	4.59112	7.92337
0.329098	0.0548401	0.068327	0.0946665		45.0177	23.652	32.268		7.86752	4.66875	7.96191
0.329514	0.0545807	0.0683508	0.0950181		45.0351	23.748	32.1974		7.95205	4.76495	8.13953
0.329931	0.0548363	0.0680804	0.0951152		45.1635	23.6259	32.2694		7.75585	4.73131	7.9764
0.330348	0.0547249	0.068195	0.0951531		45.2379	23.4459	32.5018		7.74325	4.72348	7.8445
0.330764	0.0545501	0.0684534	0.0949936		45.2596	23.749	32.511		7.78643	4.6962	7.90866
0.331181	0.0546257	0.0680964	0.0956555		45.3793	23.6765	32.4448		7.7808	4.66409	7.71553
0.331598	0.0548866	0.0682154	0.0946912		45.4557	23.6581	32.5237		7.7348	4.60756	7.83859
0.332014	0.0543968	0.0685509	0.0957159		45.4679	23.6295	32.5043		7.70816	4.67674	7.89665
0.332431	0.0549368	0.0679413	0.0946419		45.5206	23.489	32.6358		7.7488	4.75259	7.91953
0.332848	0.0547863	0.0685169	0.0950192		45.5833	23.6157	32.6026		7.75676	4.68855	7.70378
0.333264	0.0542625	0.0678669	0.0957021		45.6824	23.5205	32.4482		7.7182	4.64795	7.99162
0.333681	0.0548631	0.0685606	0.0948807		45.7468	23.5428	32.4121		7.79204	4.60548	8.05246
0.334098	0.0545753	0.0681865	0.0955567		45.7968	23.403	32.6199		7.77427	4.601	7.97127
0.334514	0.05476	0.0682312	0.0953319		45.7697	23.645	32.5622		7.69156	4.58295	7.91299
0.334931	0.0548392	0.0677112	0.0951288		45.8252	23.7141	32.5808		7.71274	4.68665	8.05444
0.335348	0.0546105	0.0683599	0.0951459		45.9189	23.5806	32.5251		7.79858	4.67799	7.78888
0.335764	0.0549535	0.0683183	0.0947872		45.9075	23.5359	32.3107		7.81555	4.6488	7.66939
0.336181	0.0546721	0.0679621	0.0947045		45.984	23.5161	32.3513		7.72246	4.65458	7.67981
0.336598	0.0551329	0.0682347	0.0950248		46.1099	23.2665	32.3435		7.70201	4.68803	7.6644
0.337014	0.0545553	0.0680948	0.0947847		46.2583	23.6422	32.4462		7.60552	4.64343	7.55838
0.337431	0.0548459	0.0681776	0.0955382		46.3373	23.9832	32.4239		7.59667	4.64379	7.66803
0.337848	0.0549775	0.0681337	0.0949301		46.4191	24.012	32.4505		7.6738	4.65374	7.77455
0.338264	0.0546781	0.0683084	0.0951205		46.3715	23.7806	32.5068		7.64233	4.62587	7.72001
0.338681	0.0546918	0.0680595	0.0948654		46.4726	23.7257	32.5482		7.62874	4.66094	8.039
0.339098	0.0546017	0.0682569	0.0947529		46.5398	23.9016	32.4483		7.63601	4.71525	8.01337
0.339514	0.0549846	0.0681415	0.094492		46.5568	23.7074	32.7119		7.62744	4.71747	7.80817
0.339931	0.054692	0.0677155	0.0942183		46.7185	23.7282	32.7079		7.65156	4.65336	7.59851
0.340348	0.0544765	0.0679044	0.0941644		46.7107	23.6371	32.6989		7.7174	4.70287	7.6952
0.340764	0.0544942	0.0678111	0.0940534		46.809	23.6576	33.0532		7.62404	4.69788	7.76063
0.341181	0.0547555	0.0682286	0.0941493		46.8557	23.5908	32.8078		7.62356	4.70255	7.57292
0.341598	0.0544962	0.0676564	0.0948143		46.9402	23.3816	32.9575		7.61728	4.71039	7.49803
0.342014	0.0550327	0.0681671	0.0944739		47.0194	23.3228	32.9643		7.62364	4.76581	7.63535
0.342431	0.0548232	0.0675505	0.094436		47.1008	23.3416	32.5848		7.61901	4.72921	7.64252
0.342848	0.0546127	0.0683568	0.0942243		47.0833	23.4803	33.0159		7.54808	4.67845	7.67069
0.343264	0.0547296	0.0678192	0.0948288		47.234	23.6368	33.1283		7.5626	4.73162	7.76757
0.343681	0.054792	0.0680744	0.0947444		47.3218	23.7263	33.0632		7.5969	4.75577	7.51528
0.344098	0.0543783	0.0679451	0.0949062		47.3861	23.7145	32.7057		7.59078	4.79039	7.50854
0.344514	0.0545406	0.0677823	0.0944307		47.3606	23.6132	32.9305		7.55462	4.80096	7.76521
0.344931	0.0546095	0.0681455	0.095271		47.5376	23.5993	32.9621		7.52244	4.7715	7.7104
0.345348	0.0543325	0.0678098	0.0956936		47.5154	23.8528	32.6425		7.52239	4.75115	7.71844
0.345764	0.054659	0.0682642	0.0953084		47.5746	23.6495	32.9705		7.51578	4.75678	7.7228
0.346181	0.0549624	0.0676959	0.0951927		47.6915	23.573	32.943		7.53135	4.76725	7.59087
0.346598	0.05453	0.0680197	0.0953692		47.727	23.5704	32.8776		7.52839	4.79116	7.66076
0.347014	0.0546334	0.0678055	0.0943473		47.725	23.6092	33.163		7.52834	4.76777	7.92007
0.347431	0.0550991	0.068074	0.0948113		47.8187	23.4593	33.3763		7.53615	4.79507	7.7171
0.347848	0.0544567	0.0679776	0.0950561		47.9304	23.6957	33.5018		7.50884	4.73903	7.76462
0.348264	0.0541761	0.0679804	0.0945169		48.0931	23.6434	32.997		7.47993	4.67335	7.68821
0.348681	0.0542755	0.0678548	0.0946995		48.1136	23.6602	33.1987		7.50246	4.67705	7.44314
0.349098	0.0545756	0.0676849	0.0946766		48.1314	23.7091	33.1961		7.4621	4.73366	8.02098
0.349514	0.0544668	0.0682222	0.0949379		48.198	23.9249	33.0881		7.49638	4.73445	7.87857
0.349931	0.0547906	0.0679613	0.0948857		48.2991	23.6464	33.3377		7.51325	4.73476	7.8325
0.350348	0.0548594	0.0679391	0.0948511		48.3568	23.7273	33.4797		7.51661	4.76853	7.85119
0.350764	0.0550068	0.0679399	0.0944804		48.4673	23.7365	33.3073		7.48782	4.72616	7.50882
0.351181	0.0549897	0.0681253	0.0947682		48.4967	23.7813	33.1179		7.46123	4.75194	7.48413
0.351598	0.0549042	0.0677883	0.0941008		48.5715	23.6695	33.0916		7.50235	4.75448	7.6873
0.352014	0.054367	0.0681371	0.0952654		48.6712	23.7498	33.2712		7.50492	4.74502	7.56625
0.352431	0.0546639	0.0678668	0.0947135		48.7533	23.7911	33.4934		7.47246	4.75337	7.77783
0.352848	0.0545084	0.0679654	0.095076		48.8593	23.6118	33.446		7.40634	4.74538	7.66523
0.353264	0.0550521	0.0682903	0.0944857		48.9477	23.7593	33.3423		7.46234	4.73585	7.51453
0.353681	0.0546634	0.0679406	0.0947974		49.0172	23.7542	33.4999		7.45218	4.76435	7.56119
0.354098	0.0546426	0.067935	0.0948233		49.0658	23.8641	33.2948		7.50831	4.73982	7.53794
0.354514	0.0549192	0.0677178	0.0948098		49.1653	23.7293	33.3372		7.47046	4.74288	7.65533
0.354931	0.0549268	0.0682891	0.094417		49.184	23.676	33.4765		7.45952	4.746	7.9143
0.355348	0.0548342	0.0681812	0.0945143		49.229	23.5249	33.5676		7.36771	4.73657	7.60295
0.355764	0.0548831	0.0680877	0.0948037		49.3482	23.8194	33.4905		7.40646	4.75782	7.6632
0.356181	0.0544429	0.0680952	0.0948577		49.4547	23.868	33.5418		7.44038	4.78027	7.39184
0.356598	0.0544856	0.0683432	0.0949267		49.5097	23.9185	33.6196		7.43741	4.75111	7.68334
0.357014	0.0547053	0.0680596	0.0946256		49.6026	23.968	33.546		7.40287	4.73037	7.7416
0.357431	0.0550901	0.0680579	0.0948067		49.6535	24.0065	33.3374		7.39048	4.7483	7.55791
0.357848	0.0547833	0.0681155	0.0946937		49.776	23.7568	33.6482		7.38338	4.74486	7.5584
0.358264	0.054782	0.0680958	0.0947849		49.8214	23.5347	33.8779		7.43152	4.754	7.37899
0.358681	0.0546196	0.068007	0.0946718		49.9449	23.9205	33.6254		7.41215	4.73386	7.88207
0.359098	0.0551861	0.0680876	0.0951146		49.9688	24.0358	33.5333		7.39217	4.78021	7.51132
0.359514	0.0547115	0.0680089	0.0946123		49.9903	24.1143	33.4703		7.37075	4.77702	7.55442
0.359931	0.0544457	0.06846	0.0947493		50.1508	23.855	33.3298		7.36221	4.74041	7.44469
0.360348	0.0546604	0.068161	0.0944827		50.2703	23.6794	33.1045		7.38314	4.7617	7.73301
0.360764	0.0550784	0.0679754	0.0950881		50.2599	23.8729	33.404		7.39425	4.7622	7.57807
0.361181	0.0549374	0.0682121	0.0946477		50.365	23.7885	33.6475		7.35753	4.72965	7.63578
0.361598	0.0550976	0.0683177	0.0948804		50.4303	23.6141	33.5268		7.30388	4.73107	7.53574
0.362014	0.0548001	0.0684691	0.0944878		50.5539	23.8329	33.7604		7.32013	4.74575	7.83139
0.362431	0.0547975	0.0682532	0.095254		50.6525	23.9407	33.9132		7.34089	4.73429	7.59844
0.362848	0.0548259	0.068742	0.0947086		50.7514	23.931	33.8902		7.40981	4.76602	7.59726
0.363264	0.0553061	0.0681295	0.0945494		50.8397	23.7588	33.8023		7.38017	4.78022	7.39931
0.363681	0.0551985	0.0685942	0.0943881		50.9466	23.9266	33.7957		7.33181	4.76129	7.76094
0.364098	0.0548135	0.0682444	0.0947367		50.9569	23.9134	33.7847		7.33436	4.74687	7.51229
0.364514	0.0548542	0.0680391	0.0943803		51.06	23.8352	33.9206		7.31013	4.70185	7.51613
0.364931	0.0549851	0.0685969	0.0943429		51.1151	23.7481	33.8272		7.34988	4.74077	7.58818
0.365348	0.0545011	0.0679977	0.0949063		51.1982	23.8819	33.5915		7.36544	4.72539	7.51307
0.365764	0.0554038	0.0681859	0.0945424		51.3059	23.7903	34.0211		7.32269	4.72871	7.63683
0.366181	0.054966	0.0680488	0.0943578		51.4499	23.7558	33.8112		7.29164	4.74588	7.44375
0.366598	0.0551768	0.0681292	0.0942821		51.4376	23.7347	34.103		7.26944	4.72895	7.73238
0.367014	0.0549202	0.0681809	0.0946013		51.4791	23.9587	33.7794		7.29542	4.74758	7.58989
0.367431	0.0544656	0.0681745	0.0943757		51.5863	23.7553	33.9944		7.25023	4.76294	7.3652
0.367848	0.0545784	0.0684518	0.0948282		51.6556	23.6841	33.7324		7.27833	4.76991	7.19948
0.368264	0.0554599	0.0681915	0.094893		51.763	23.9671	34.0592		7.28838	4.71585	7.30691
0.368681	0.0550117	0.0682197	0.0938633		51.8984	23.9344	34.0915		7.33899	4.76006	7.35574
0.369098	0.0545333	0.0683672	0.0941904		51.9071	23.902	33.9201		7.28079	4.77199	7.66414
0.369514	0.0556654	0.0681579	0.0941427		52.0132	23.8243	33.9371		7.27966	4.72327	7.37483
0.369931	0.0550174	0.0681116	0.0941569		52.0797	23.7213	34.0369		7.26157	4.7259	7.75302
0.370348	0.0552022	0.068097	0.0943301		52.0852	23.8974	34.066		7.29389	4.74271	7.67593
0.370764	0.0545877	0.0681507	0.0949037		52.2412	24.0057	34.2327		7.30198	4.71862	7.69017
0.371181	0.0548196	0.0683019	0.0935805		52.2897	24.0451	34.4423		7.2948	4.72774	7.50481
0.371598	0.0551726	0.0681907	0.0941778		52.3922	24.1146	34.245		7.28822	4.71501	7.38103
0.372014	0.0548206	0.0682972	0.0945843		52.4388	24.0063	34.0336		7.25731	4.70625	7.45355
0.372431	0.0553825	0.0682275	0.0945442		52.5768	23.8533	34.4517		7.2899	4.75885	7.30239
0.372848	0.0549615	0.06806	0.0940525		52.6403	23.9984	34.2978		7.26387	4.75342	7.53737
0.373264	0.0547645	0.0682218	0.0940295		52.6531	23.8343	34.1088		7.27869	4.72179	7.43636
0.373681	0.0550327	0.0685869	0.0942813		52.8144	23.7086	34.0533		7.24729	4.71171	7.55103
0.374098	0.0549115	0.0681271	0.0944411		52.981	23.8662	34.3352		7.29806	4.75042	7.28905
0.374514	0.0549933	0.0682135	0.0945923		52.9498	23.8833	34.7201		7.2387	4.74598	7.26661
0.374931	0.0550201	0.0679837	0.0941348		53.0493	23.9272	34.2567		7.25825	4.72133	7.50942
0.375348	0.0553193	0.067839	0.0942531		53.1244	23.6651	34.2732		7.24536	4.76122	7.62176
0.375764	0.0548214	0.0682226	0.0944882		53.164	23.7557	34.6174		7.21977	4.7464	7.48854
0.376181	0.0549551	0.0679987	0.0942233		53.2678	23.9314	34.7095		7.24805	4.72066	7.50761
0.376598	0.0551154	0.0678081	0.0946959		53.3608	24.0798	34.2278		7.25296	4.69706	7.35734
0.377014	0.054918	0.0682375	0.09484		53.4576	24.0323	34.3691		7.23087	4.7017	7.34015
0.377431	0.0541118	0.0683146	0.0948351		53.6681	24.0458	34.3462		7.20801	4.69832	7.5132
0.377848	0.0550108	0.0680932	0.0942372		53.6301	23.9567	34.4672		7.1546	4.72733	7.5879
0.378264	0.0548302	0.0680435	0.0944875		53.7058	23.9204	34.4993		7.17897	4.72659	7.52233
0.378681	0.0546996	0.0679946	0.0941211		53.7905	24.0828	34.4855		7.16697	4.70586	7.57943
0.379098	0.0548277	0.0678489	0.0950457		53.9742	24.1521	34.4004		7.202	4.69351	7.54572
0.379514	0.0551649	0.067746	0.0946915		53.895	24.0107	34.5138		7.17816	4.71385	7.53771
0.379931	0.0550056	0.0680934	0.0944966		54.0287	23.8481	34.7827		7.16818	4.6925	7.53141
0.380348	0.054677	0.0679494	0.0945338		54.0463	24.2588	34.3279		7.16406	4.66733	7.42553
0.380764	0.0549019	0.0680177	0.0942711		54.1687	24.1588	34.412		7.17372	4.69986	7.3115
0.381181	0.054764	0.0678161	0.0945661		54.3225	23.9989	34.7977		7.17952	4.68278	7.19769
0.381598	0.0550194	0.0679254	0.0939869		54.4167	24.0747	34.8879		7.1999	4.69898	7.40425
0.382014	0.0549039	0.0680256	0.0946523		54.4501	24.0292	34.4441		7.24019	4.72698	7.23937
0.382431	0.054625	0.0678527	0.0943916		54.544	23.9492	34.5928		7.20778	4.74041	7.33546
0.382848	0.0547125	0.0679143	0.0947185		54.6895	24.2525	34.7989		7.19275	4.73105	7.48173
0.383264	0.0547072	0.0678188	0.0941619		54.7055	24.1429	34.6697		7.19256	4.73402	7.23631
0.383681	0.0552151	0.0679731	0.0943821		54.8328	24.1809	34.5112		7.22235	4.71444	7.53987
0.384098	0.055216	0.0679697	0.0940591		54.8592	24.2698	34.8435		7.17811	4.67965	7.47269
0.384514	0.0547083	0.068067	0.0944536		54.9944	24.2039	34.7348		7.15167	4.68646	7.28192
0.384931	0.0551379	0.0681668	0.094277		55.0599	24.2096	34.7089		7.1523	4.71221	7.42962
0.385348	0.0547939	0.0678822	0.0941258		55.1584	24.2882	34.6294		7.12188	4.70728	7.38279
0.385764	0.0548948	0.0679234	0.0943326		55.0987	24.2507	34.61		7.27137	4.65355	7.47865
0.386181	0.0550204	0.0682963	0.0947432		55.2237	24.1098	34.7405		7.15841	4.67666	7.55103
0.386598	0.0546804	0.0684159	0.0937608		55.3218	24.0651	34.8724		7.16883	4.69763	7.47342
0.387014	0.0553309	0.0683086	0.0943249		55.3896	23.8736	34.998		7.10779	4.68545	7.39097
0.387431	0.0548382	0.0680134	0.0939519		55.4712	24.0988	34.7837		7.08906	4.70878	7.39367
0.387848	0.0547878	0.068014	0.0943781		55.6684	24.2186	34.6868		7.11111	4.70794	7.38853
0.388264	0.0551639	0.0683107	0.0940711		55.7254	24.1561	35.0949		7.04638	4.67641	7.41783
0.388681	0.055101	0.0677545	0.0948115		55.8068	24.0237	35.0556		7.07244	4.66506	7.71137
0.389098	0.0544386	0.0682921	0.0939693		55.8267	24.1467	35.0384		7.05815	4.70701	7.4852
0.389514	0.0550117	0.0681428	0.0944383		55.9605	24.2523	35.1981		7.10205	4.68382	7.36255
0.389931	0.0550656	0.0678767	0.0942395		56.0315	24.1663	35.0713		7.07407	4.68968	7.42387
0.390348	0.0547951	0.0684097	0.0942797		56.1508	24.3418	35.1176		7.09061	4.75261	7.19299
0.390764	0.0547046	0.068167	0.0941797		56.2229	24.5544	35.1198		7.08527	4.70494	7.19961
0.391181	0.0550895	0.0678527	0.0940812		56.2923	24.2635	35.2188		7.03682	4.65572	7.4052
0.391598	0.0549874	0.0681006	0.0947713		56.4454	24.1245	35.3139		7.03779	4.67256	7.63355
0.392014	0.0547129	0.0682684	0.0945065		56.452	23.8993	35.3066		7.09284	4.67389	7.50345
0.392431	0.0551096	0.0679148	0.0940953		56.5038	24.1705	35.468		7.06721	4.66138	7.47155
0.392848	0.0546982	0.068626	0.0939846		56.6348	24.125	35.1749		7.06867	4.65909	7.18842
0.393264	0.0549743	0.0680905	0.0944041		56.6887	24.0432	35.161		7.03598	4.71576	7.38707
0.393681	0.0549656	0.0684627	0.0945172		56.7446	24.1992	35.2507		7.02453	4.71874	7.32218
0.394098	0.0553729	0.0683788	0.0940955		56.8925	24.0251	35.2451		7.02378	4.68289	7.45148
0.394514	0.0545504	0.0682211	0.0941008		57.0013	24.0614	35.2564		6.99246	4.66956	7.35723
0.394931	0.0552851	0.0682774	0.0940486		57.18	24.2936	35.1988		7.00396	4.66859	7.34498
0.395348	0.0551428	0.0686828	0.0940305		57.2039	24.1239	35.267		7.01247	4.69566	7.38164
0.395764	0.0547859	0.0682481	0.0939291		57.1869	24.3287	35.3122		6.99001	4.68273	7.3736
0.396181	0.0550571	0.0681786	0.0941299		57.2578	24.2112	35.353		6.9984	4.70854	7.40123
0.396598	0.055499	0.068317	0.094185		57.3399	24.1186	35.3814		7.03552	4.71878	7.38146
0.397014	0.0550867	0.0684694	0.0946375		57.4088	24.3837	35.3904		7.02302	4.7013	7.53267
0.397431	0.0554567	0.0683966	0.0943117		57.5358	24.3254	35.3538		6.99009	4.70901	7.47112
0.397848	0.0549968	0.0682505	0.0941837		57.6338	24.0985	35.3965		7.01544	4.72623	7.24419
0.398264	0.0555461	0.0684547	0.0943381		57.8419	23.9945	35.4887		7.01505	4.73083	7.50147
0.398681	0.0551206	0.0683651	0.0937937		57.8135	24.1411	35.425		6.94912	4.71023	7.49383
0.399098	0.0554055	0.0685658	0.0944509		57.9932	24.4127	35.4713		6.96496	4.74939	7.23749
0.399514	0.0552326	0.0688918	0.0943108		57.9884	24.345	35.2848		7.01431	4.7178	7.21466
0.399931	0.0551046	0.0683039	0.0943003		58.0321	24.4291	35.4909		7.00471	4.7263	7.25114
0.400348	0.054702	0.0685605	0.0942732		58.0916	24.4017	35.8281		6.97337	4.74706	7.30442
0.400764	0.0551236	0.0684742	0.0943744		58.2737	24.4053	35.8824		6.96931	4.75691	7.362
0.401181	0.0554008	0.0686808	0.0940085		58.2847	24.3253	35.5524		6.98419	4.74591	7.48423
0.401598	0.0549009	0.0683043	0.0944919		58.4405	24.3332	35.5371		6.98238	4.7436	7.30002
0.402014	0.0553706	0.0685491	0.0943267		58.5059	24.3523	35.5103		6.9692	4.74674	7.45126
0.402431	0.0551754	0.0684885	0.0944876		58.6629	24.2007	35.3927		6.96318	4.74026	7.44909
0.402848	0.0551275	0.068464	0.094732		58.7293	24.3425	35.8164		6.98106	4.722	7.39589
0.403264	0.0553828	0.0687333	0.0942975		58.811	24.4353	35.8799		7.01877	4.70989	7.25013
0.403681	0.0546017	0.0687328	0.0948476		58.9198	24.3829	35.9878		6.93747	4.69822	7.17143
0.404098	0.05504	0.0685018	0.0946545		58.9628	24.3892	35.7272		6.91784	4.70808	7.20241
0.404514	0.0558306	0.0686022	0.0944061		58.9831	24.2123	35.7335		6.95452	4.70188	7.32981
0.404931	0.0555215	0.0687809	0.0939398		59.1434	24.2004	36.0578		6.94793	4.69653	7.57029
0.405348	0.0556416	0.0683061	0.0941419		59.1567	24.1946	36.0318		6.95136	4.70654	7.54872
0.405764	0.055351	0.0685065	0.0942526		59.2816	24.2753	36.2096		6.91875	4.70352	7.4292
0.406181	0.0551518	0.0688024	0.0940636		59.3805	24.2436	36.019		6.90671	4.73215	7.6527
0.406598	0.055234	0.0679802	0.0943999		59.4899	24.2736	36.0691		6.93292	4.74237	7.45869
0.407014	0.0553984	0.068598	0.0942857		59.5824	24.2438	35.8591		6.9044	4.71787	7.67252
0.407431	0.0550325	0.0682445	0.0939539		59.6712	24.216	35.6664		6.90917	4.69757	7.42142
0.407848	0.0556966	0.0685384	0.0936559		59.757	24.3549	36.0103		6.93333	4.7307	7.45795
0.408264	0.0549104	0.0684025	0.0940662		59.7898	24.3455	36.348		6.95438	4.71131	7.32362
0.408681	0.0553367	0.068259	0.0946296		59.9498	24.6493	36.2684		6.98575	4.67586	7.11248
0.409098	0.0550914	0.0679522	0.0942174		59.954	24.3661	35.8289		6.92613	4.70001	7.33113
0.409514	0.055518	0.0686363	0.093936		60.0644	24.3386	35.8477		6.93599	4.75624	7.4279
0.409931	0.0549396	0.0684178	0.0940698		60.0639	24.4026	35.9985		6.93893	4.72461	7.42264
0.410348	0.0548327	0.0685847	0.0941418		60.3085	24.4202	36.229		6.95773	4.70815	7.40446
0.410764	0.0554362	0.068206	0.0939069		60.2949	24.3974	36.3775		6.90451	4.76273	7.17187
0.411181	0.0555461	0.0680199	0.094006		60.4124	24.2574	36.1673		6.87753	4.72975	7.4843
0.411598	0.0553162	0.0685054	0.094253		60.5066	24.168	36.1144		6.89818	4.74428	7.4782
0.412014	0.055186	0.0675898	0.0943555		60.5538	24.2418	36.4395		6.89693	4.72229	7.30014
0.412431	0.0553448	0.0681949	0.0945193		60.6599	24.2294	36.3562		6.86049	4.75574	7.28334
0.412848	0.0548999	0.0682113	0.0941535		60.6949	24.2438	36.2528		6.87652	4.76029	7.47623
0.413264	0.0555195	0.0681629	0.0937189		60.7796	24.3698	36.2196		6.87982	4.72195	7.31823
0.413681	0.0548286	0.0682156	0.0942333		60.853	24.4638	36.447		6.90295	4.7163	7.39842
0.414098	0.0551962	0.0683948	0.0940718		60.9798	24.5474	36.4928		6.93884	4.74228	7.30194
0.414514	0.0552769	0.0681251	0.0941837		61.0612	24.4159	36.3415		6.91073	4.69861	7.24011
0.414931	0.0552796	0.0683596	0.0945084		61.1331	24.4005	36.3828		6.87919	4.72186	7.15627
0.415348	0.0552572	0.0681612	0.0944395		61.2409	24.3774	36.4182		6.93628	4.76261	7.24852
0.415764	0.0553618	0.0679961	0.0935453		61.2864	24.455	36.2995		6.95767	4.7361	7.35428
0.416181	0.0552887	0.0681567	0.0938098		61.3918	24.6281	36.4083		6.90707	4.73276	6.96562
0.416598	0.0550897	0.0683275	0.0936078		61.4143	24.5973	36.4444		6.91725	4.74274	7.17051
0.417014	0.0554392	0.0683976	0.0935481		61.5689	24.4943	36.3512		6.88551	4.75652	7.46432
0.417431	0.0556015	0.0682958	0.0937895		61.6863	24.6032	36.4208		6.8691	4.69642	7.47545
0.417848	0.0552011	0.0682963	0.0941394		61.7775	24.5361	36.2828		6.84407	4.72733	7.4917
0.418264	0.0552643	0.0682011	0.0939616		61.7979	24.6372	36.3748		6.87864	4.7355	7.28373
0.418681	0.0549698	0.0683525	0.0938024		61.9296	24.4278	36.363		6.81362	4.71859	7.43969
0.419098	0.0546253	0.0683464	0.0941179		61.9932	24.4951	36.3333		6.80365	4.70771	7.04025
0.419514	0.0552971	0.0679362	0.0937016		62.1084	24.4563	36.5054		6.83979	4.75939	7.19653
0.419931	0.0550943	0.0682385	0.0938637		62.1627	24.4995	36.8451		6.85326	4.72628	7.20333
0.420348	0.0550272	0.0681254	0.0938126		62.283	24.3556	36.615		6.81205	4.74959	7.28519
0.420764	0.0548769	0.0683455	0.0944229		62.356	24.3464	36.5391		6.76061	4.73423	7.25548
0.421181	0.0550586	0.0686744	0.0943463		62.4677	24.7029	36.564		6.80526	4.75591	7.18459
0.421598	0.0555164	0.0681418	0.0942267		62.595	24.5897	36.6847		6.81059	4.74351	7.20449
0.422014	0.0551409	0.0685418	0.0944331		62.6015	24.7427	36.8903		6.75866	4.71744	7.16336
0.422431	0.0549954	0.068165	0.0938694		62.6768	24.7855	36.7334		6.76681	4.70595	7.22551
0.422848	0.0551389	0.0685456	0.0938863		62.7777	24.4641	36.563		6.78396	4.74326	7.19793
0.423264	0.0555204	0.0686799	0.094122		62.9097	24.4656	36.7084		6.784	4.73679	7.12473
0.423681	0.0550023	0.0681844	0.0941109		62.9606	24.4688	36.744		6.80486	4.72948	7.13139
0.424098	0.0555235	0.06857	0.0936146		63.0478	24.6223	36.8401		6.7591	4.74346	7.14947
0.424514	0.0559827	0.0683458	0.0942325		63.1094	24.7321	36.6845		6.77227	4.75266	6.97324
0.424931	0.0553267	0.0687345	0.0939093		63.263	24.6242	36.6549		6.78396	4.71114	7.08746
0.425348	0.0554869	0.0685132	0.0940749		63.2895	24.4435	36.7935		6.77188	4.69985	7.11954
0.425764	0.05498	0.0683445	0.0943885		63.4168	24.4865	36.7526		6.79182	4.71846	7.46305
0.426181	0.0557694	0.0681225	0.0946004		63.5528	24.5941	36.4896		6.7895	4.73503	7.18274
0.426598	0.0559091	0.0684013	0.0943653		63.5473	24.4918	36.8774		6.77685	4.74691	7.01639
0.427014	0.0558874	0.0682161	0.0941538		63.6214	24.4682	36.8937		6.79671	4.75203	7.27421
0.427431	0.0555044	0.0686589	0.0942699		63.7281	24.7645	37.0768		6.77681	4.72521	7.23322
0.427848	0.0554165	0.0683019	0.094502		63.7986	24.7361	37.0265		6.75634	4.72834	7.27719
0.428264	0.0560895	0.0684734	0.0945399		63.9381	24.6665	36.9222		6.732	4.76747	7.19312
0.428681	0.0553554	0.0681629	0.0945198		63.9144	24.7827	37.0863		6.76728	4.77412	7.27278
0.429098	0.0561284	0.0688626	0.094249		64.1272	24.8025	37.071		6.74336	4.77871	7.3415
0.429514	0.0553842	0.0683436	0.0940085		64.1802	24.8707	37.3207		6.73583	4.73039	7.57458
0.429931	0.0557523	0.0685817	0.0947836		64.1367	24.7709	37.4529		6.77869	4.74945	7.32723
0.430348	0.0560048	0.068556	0.0947214		64.303	24.8167	37.5801		6.78637	4.78235	7.28329
0.430764	0.0558045	0.0683343	0.0945681		64.3383	24.6849	37.5946		6.77942	4.75465	7.26937
0.431181	0.0559611	0.0683083	0.0944068		64.4794	24.7616	37.7323		6.7927	4.77007	7.10569
0.431598	0.0556437	0.0691168	0.0945358		64.5406	24.6255	37.5765		6.7576	4.74465	7.24225
0.432014	0.0557431	0.0684449	0.0943912		64.62	24.5976	37.5514		6.73155	4.76673	7.10738
0.432431	0.055313	0.0684014	0.0942192		64.6545	24.5104	37.1245		6.72316	4.74054	7.25842
0.432848	0.0557676	0.0688357	0.094152		64.8259	24.6099	37.2188		6.75591	4.76916	7.36343
0.433264	0.0558101	0.0687182	0.0943522		64.9404	24.5627	37.3421		6.73066	4.76662	7.27206
0.433681	0.055327	0.0687575	0.0943076		65.0347	24.5048	37.5782		6.76576	4.73851	7.27609
0.434098	0.055589	0.0685008	0.0944934		65.1303	24.6629	37.4239		6.76356	4.759	7.15312
0.434514	0.0559308	0.0686084	0.0943756		65.2124	24.4424	37.502		6.76342	4.7375	7.06108
0.434931	0.0557765	0.0685121	0.0944943		65.1951	24.4488	37.5976		6.72811	4.73921	7.02951
0.435348	0.0560933	0.0688888	0.0943446		65.3903	24.6295	37.4539		6.77863	4.73999	7.22411
0.435764	0.0561352	0.0682437	0.0934855		65.4405	24.636	37.8909		6.79523	4.75739	7.18097
0.436181	0.0553971	0.0682063	0.0941803		65.5423	24.4965	37.8557		6.78326	4.76098	7.15534
0.436598	0.0560455	0.0684834	0.0941502		65.6311	24.5904	37.8113		6.7293	4.75622	7.13359
0.437014	0.0557869	0.0686181	0.0941949		65.7611	24.5401	37.8435		6.72342	4.72879	7.11202
0.437431	0.0556386	0.0686438	0.0940489		65.7761	24.6359	37.7662		6.71582	4.74952	7.24817
0.437848	0.0559881	0.0684932	0.0940924		65.9418	24.8175	37.7751		6.68992	4.76008	6.97283
0.438264	0.0557716	0.0687126	0.0938338		65.996	24.8772	37.5976		6.74527	4.74553	7.16135
0.438681	0.0558976	0.0683455	0.0939973		66.0504	24.6611	37.5837		6.73974	4.76478	7.30197
0.439098	0.0558094	0.0684065	0.0940316		66.1061	24.6364	37.6601		6.72607	4.79167	7.46331
0.439514	0.0551571	0.0682597	0.0943736		66.1729	24.9162	37.8324		6.73177	4.7397	7.34813
0.439931	0.0558922	0.0683309	0.0940073		66.3048	24.9058	37.9318		6.75884	4.72335	7.15017
0.440348	0.0563826	0.0684151	0.0945099		66.3569	24.8218	37.9664		6.76659	4.7328	7.16329
0.440764	0.0560748	0.0684304	0.0941366		66.4462	24.8649	38.0098		6.76507	4.74686	7.08677
0.441181	0.0559839	0.0685758	0.0938209		66.5023	24.7703	38.2208		6.72033	4.72383	7.21578
0.441598	0.0560597	0.0686149	0.0939069		66.6477	24.7529	38.099		6.68015	4.75354	7.16298
0.442014	0.055932	0.068156	0.0935326		66.7158	24.9777	38.1105		6.71338	4.72711	7.27041
0.442431	0.0559653	0.0688559	0.0942166		66.8279	24.8643	38.083		6.70357	4.72184	7.28104
0.442848	0.0562143	0.0684444	0.0942211		66.7925	24.866	37.8351		6.67685	4.74253	7.25477
0.443264	0.0556647	0.0684009	0.0939072		66.8781	24.7746	38.0853		6.69481	4.76798	7.23305
0.443681	0.0555824	0.0683449	0.0937476		66.9059	24.7666	38.0473		6.66978	4.75955	7.10841
0.444098	0.0562828	0.0681589	0.0940043		67.0853	24.6561	38.0113		6.65052	4.76806	7.12093
0.444514	0.0554853	0.0684207	0.0938924		67.1625	24.9185	38.3872		6.65346	4.72217	7.1498
0.444931	0.0562219	0.0688019	0.0934644		67.3085	24.8555	38.4256		6.68499	4.74959	7.09594
0.445348	0.0558294	0.0678748	0.093683		67.3638	24.8967	38.2387		6.75488	4.74233	7.0797
0.445764	0.0559039	0.0683169	0.0934696		67.5451	24.7964	38.2463		6.68408	4.74452	7.13969
0.446181	0.0556685	0.0687655	0.0933947		67.5407	24.9781	37.9659		6.6767	4.75049	7.25801
0.446598	0.056325	0.0681629	0.0940181		67.649	25.0479	38.1157		6.71966	4.76427	7.20128
0.447014	0.0557927	0.0679794	0.0941419		67.6986	24.8686	38.329		6.72373	4.78828	7.3248
0.447431	0.0560234	0.0682361	0.0939858		67.8404	24.7833	38.2917		6.71492	4.7627	7.18281
0.447848	0.0564554	0.0683684	0.0942363		67.922	25.0516	38.2945		6.67698	4.78588	7.29177
0.448264	0.056351	0.0685601	0.0934205		67.9524	24.8491	38.4795		6.66718	4.73139	7.34777
0.448681	0.0555297	0.0684201	0.0934173		68.0819	24.8042	38.1742		6.6095	4.71578	7.18324
0.449098	0.0561114	0.0684897	0.0934368		68.1555	24.731	38.4315		6.62318	4.72963	7.10765
0.449514	0.0555648	0.067933	0.0937936		68.1913	25.0593	38.2825		6.62021	4.75691	7.27348
0.449931	0.0554606	0.0685822	0.093417		68.3127	24.8494	38.5629		6.64159	4.74195	7.51505
0.450348	0.0555257	0.0686617	0.0940681		68.3467	24.7353	38.7755		6.64712	4.73484	7.33253
0.450764	0.0561683	0.0684202	0.0940673		68.4474	24.9368	38.6103		6.65395	4.75605	7.20857
0.451181	0.0556662	0.068138	0.0944112		68.4541	24.967	38.4473		6.64964	4.7475	7.25466
0.451598	0.0563891	0.068512	0.0938177		68.5432	25.0849	38.4278		6.68223	4.71971	7.12012
0.452014	0.0556496	0.0685973	0.0933789		68.6791	25.0498	38.6277		6.64501	4.71845	7.43457
0.452431	0.0557995	0.0685206	0.0941744		68.7845	24.8685	38.2557		6.59782	4.73446	7.28369
0.452848	0.0557956	0.0679459	0.093595		68.8499	24.8641	38.5602		6.62952	4.74939	7.14668
0.453264	0.0560461	0.0687449	0.0941257		68.9348	24.9671	38.7493		6.66676	4.75094	7.12771
0.453681	0.0555872	0.0681566	0.0942147		69.0177	25.1185	38.8372		6.62454	4.75834	7.23672
0.454098	0.0558256	0.0688604	0.0942037		69.136	25.2421	38.8088		6.65099	4.73684	6.8871
0.454514	0.0558835	0.068357	0.0938241		69.1936	24.9227	38.7219		6.63845	4.73931	6.86047
0.454931	0.0560532	0.0686137	0.094032		69.268	24.9453	38.4555		6.62431	4.76789	6.74373
0.455348	0.0559432	0.0686062	0.0941779		69.3597	25.212	38.5965		6.60555	4.76002	7.18816
0.455764	0.0556846	0.0683462	0.0939827		69.3748	24.9585	38.9803		6.61298	4.74967	7.16876
0.456181	0.0557257	0.0686174	0.0934552		69.4411	24.8918	38.6978		6.5733	4.77387	6.97595
0.456598	0.0557391	0.0684899	0.0937456		69.5711	24.9404	38.6324		6.59153	4.76679	6.99745
0.457014	0.0559454	0.0685002	0.0940425		69.6255	24.9144	38.7751		6.60164	4.7585	7.02236
0.457431	0.0560765	0.068732	0.0939484		69.7163	24.7079	38.8205		6.57637	4.73642	7.10222
0.457848	0.0561784	0.0686344	0.0935858		69.8418	24.8818	38.9008		6.62207	4.7543	7.29455
0.458264	0.0555459	0.0683228	0.0937527		69.877	24.9525	38.6618		6.65115	4.74962	7.15658
0.458681	0.0558492	0.0684986	0.0943704		70.042	25.0603	38.8109		6.61653	4.73081	7.09556
0.459098	0.0558394	0.0682169	0.0939919		70.0402	25.0523	38.9634		6.59444	4.76292	7.00638
0.459514	0.0557907	0.0686263	0.093585		70.1711	25.1319	39.0141		6.57555	4.73958	6.96855
0.459931	0.0562617	0.0687387	0.0938469		70.3642	25.2253	39.0972		6.54655	4.70213	6.83655
0.460348	0.055956	0.0689249	0.0939733		70.4372	24.8556	39.1536		6.56275	4.7561	6.82637
0.460764	0.0559018	0.0687802	0.093823		70.5379	24.7607	39.344		6.60974	4.78674	7.14375
0.461181	0.0560267	0.0685528	0.0940315		70.6147	25.0913	38.9987		6.58355	4.76346	7.1431
0.461598	0.0561984	0.0684682	0.0945338		70.628	25.0609	38.9843		6.72913	4.75299	7.0764
0.462014	0.056067	0.0686303	0.0943982		70.7137	24.8838	38.9574		6.59337	4.75934	7.06419
0.462431	0.0563015	0.068572	0.0941829		70.8176	25.1276	39.0418		6.53447	4.73843	6.72031
0.462848	0.0560065	0.0690944	0.0938884		70.7956	25.1036	39.1237		6.53725	4.73554	6.92299
0.463264	0.0566037	0.0684568	0.0942267		70.8856	24.8773	39.238		6.52676	4.75066	7.22554
0.463681	0.056164	0.0688084	0.0941148		71.0356	25.0554	39.4167		6.53349	4.79543	7.03754
0.464098	0.056111	0.0686758	0.0936177		71.1509	25.07	39.1896		6.52766	4.74274	6.97554
0.464514	0.0561002	0.0685872	0.0939904		71.2144	25.1412	39.3682		6.52051	4.72473	6.86341
0.464931	0.0563586	0.0687207	0.0938655		71.3139	25.1608	39.3194		6.51631	4.75092	6.93951
0.465348	0.0565473	0.0688444	0.0945183		71.3217	25.4147	39.3803		6.5203	4.77614	6.96188
0.465764	0.0561	0.0688602	0.0939978		71.5291	25.2766	39.3605		6.53002	4.76512	7.38311
0.466181	0.0565456	0.0685454	0.0938414		71.5074	25.1152	39.6242		6.50152	4.74775	7.16312
0.466598	0.0566385	0.0688228	0.0939833		71.6193	25.1458	39.3983		6.55085	4.76217	7.13004
0.467014	0.056364	0.0690581	0.0938585		71.7068	25.0579	39.5616		6.55217	4.73588	7.22492
0.467431	0.0564724	0.0683738	0.0942455		71.7863	25.3322	39.6877		6.55132	4.77104	7.21311
0.467848	0.0562028	0.0689494	0.0938159		71.8055	25.478	39.4082		6.54406	4.78332	7.38303
0.468264	0.0564945	0.0686922	0.0942147		71.8836	25.2114	39.5081		6.53151	4.77284	7.31203
0.468681	0.0566001	0.06865	0.0937419		72.0226	25.1873	39.6156		6.55017	4.74785	7.09399
0.469098	0.0566048	0.0690229	0.0935751		72.1528	25.2938	39.392		6.58065	4.74068	6.90886
0.469514	0.0567161	0.0684376	0.0938363		72.2959	25.3972	39.5779		6.52221	4.7499	6.96055
0.469931	0.05669	0.0687987	0.0941397		72.251	25.2986	40.0055		6.52321	4.76141	6.96379
0.470348	0.0565927	0.0687107	0.0938891		72.4029	24.9897	39.8935		6.5371	4.74713	6.92139
0.470764	0.0565119	0.0685113	0.0938937		72.4515	25.2733	39.7202		6.513	4.76046	6.89978
0.471181	0.0563626	0.0686238	0.0937773		72.5153	25.3128	39.4677		6.51668	4.7677	6.91144
0.471598	0.0565928	0.0688572	0.0939239		72.522	25.0695	39.7817		6.54926	4.75252	7.01264
0.472014	0.0565742	0.068869	0.0940016		72.7016	25.0728	39.9224		6.54643	4.73271	7.06389
0.472431	0.0564792	0.0687486	0.0937386		72.7507	24.982	39.9062		6.51214	4.7349	7.10182
0.472848	0.0571719	0.0685986	0.0932494		72.7896	25.0932	39.7826		6.61515	4.74174	7.14687
0.473264	0.0569058	0.0691845	0.0939233		72.8597	25.2469	39.7403		6.48828	4.69729	7.20901
0.473681	0.0564073	0.0686994	0.0935262		72.9606	24.9788	39.873		6.46426	4.69266	7.2034
0.474098	0.0564722	0.0687276	0.0943969		73.0889	25.0938	39.8632		6.51319	4.72885	7.21131
0.474514	0.0563202	0.0686441	0.0932038		73.2254	25.0763	40.0179		6.48682	4.74601	7.19198
0.474931	0.0567649	0.0690668	0.0941087		73.2065	25.3217	40.2533		6.45085	4.73292	7.19338
0.475348	0.0564226	0.0685315	0.0940041		73.2846	25.2152	40.0636		6.48826	4.77459	6.97712
0.475764	0.0569719	0.0688152	0.0939109		73.4283	25.1856	40.2076		6.45678	4.74415	6.9951
0.476181	0.057262	0.0685572	0.0938947		73.5289	25.1006	39.9719		6.48343	4.72246	7.0202
0.476598	0.0568618	0.0687951	0.0934506		73.4814	25.2376	40.1183		6.4688	4.74329	7.00126
0.477014	0.0562725	0.0689012	0.0941534		73.5875	25.1948	40.1565		6.50038	4.7765	6.89465
0.477431	0.0568319	0.0686447	0.0934004		73.7345	25.1578	40.1291		6.50265	4.78874	7.00256
0.477848	0.0564818	0.0684315	0.0941798		73.9099	25.1404	40.0215		6.48799	4.76861	7.03499
0.478264	0.056507	0.068662	0.0936724		73.9782	25.2331	40.2343		6.55144	4.7712	7.07129
0.478681	0.0572836	0.0688414	0.0939698		74.0207	25.2956	40.359		6.45673	4.77804	7.26191
0.479098	0.0568537	0.0685227	0.0938182		74.0674	25.3678	40.4167		6.43429	4.74346	7.08084
0.479514	0.0565426	0.0686428	0.0942506		74.0988	25.3121	40.1172		6.43804	4.71125	7.34714
0.479931	0.0567145	0.0687305	0.0939336		74.2325	25.2665	40.3497		6.48202	4.73517	7.04064
0.480348	0.0567906	0.0681471	0.0940501		74.2388	25.2132	40.4101		6.52846	4.7388	7.03972
0.480764	0.0561756	0.068751	0.0937691		74.3648	25.259	40.4306		6.45077	4.74288	7.14658
0.481181	0.0567694	0.0687228	0.0933853		74.4366	25.2464	40.3146		6.46818	4.74127	6.99757
0.481598	0.0565476	0.0684313	0.0937594		74.4835	25.3422	40.4581		6.48442	4.75294	7.11293
0.482014	0.056652	0.0683748	0.0933616		74.5255	25.0857	40.4609		6.46472	4.74918	7.14859
0.482431	0.0567292	0.0686588	0.0939067		74.6488	25.23	40.1503		6.44906	4.75899	7.02354
0.482848	0.0568838	0.0686411	0.0937838		74.7357	25.0659	40.4651		6.41732	4.77281	7.00058
0.483264	0.05687	0.0685739	0.0937031		74.8148	25.23	40.4172		6.44698	4.79016	7.05914
0.483681	0.0566288	0.0684598	0.0937305		74.9465	25.3821	40.3953		6.41541	4.73384	7.30604
0.484098	0.0566716	0.0685121	0.0937743		75.0079	25.2869	40.3883		6.41425	4.76106	6.91174
0.484514	0.0563044	0.0687448	0.0934212		75.0895	25.3699	40.6648		6.45533	4.78147	7.14125
0.484931	0.0562464	0.0681744	0.0938223		75.1665	25.4012	40.8697		6.47882	4.78254	7.33048
0.485348	0.0570028	0.0685886	0.0938213		75.2929	25.4224	40.6663		6.46315	4.74277	6.96283
0.485764	0.0572476	0.0688488	0.0937432		75.3637	25.6765	40.8651		6.48044	4.75216	7.31128
0.486181	0.0569411	0.0687668	0.0939397		75.3627	25.5391	40.5671		6.43224	4.77344	7.08498
0.486598	0.056831	0.068286	0.094034		75.4551	25.2864	40.5983		6.37414	4.75852	7.01922
0.487014	0.0564726	0.0684928	0.0937042		75.646	25.1443	40.7461		6.37932	4.76621	7.04293
0.487431	0.056824	0.0688842	0.0940673		75.6556	25.3875	40.9843		6.41939	4.78111	7.01174
0.487848	0.0562108	0.0683238	0.093845		75.7252	25.3727	41.201		6.38111	4.75749	7.11348
0.488264	0.0571085	0.0686911	0.0939991		75.833	25.3757	40.9394		6.4077	4.75313	6.93337
0.488681	0.0567098	0.0685992	0.0944638		76.0018	25.4343	40.8934		6.39037	4.74524	7.04497
0.489098	0.056769	0.0684213	0.0942555		75.9999	25.2456	41.1555		6.40378	4.77082	7.10748
0.489514	0.0566315	0.0689681	0.0944424		75.9906	25.1446	41.1048		6.44028	4.77645	7.2454
0.489931	0.0565666	0.0685875	0.0941109		76.1117	25.4505	41.0145		6.38207	4.73635	7.1531
0.490348	0.0566932	0.0689539	0.0939607		76.2455	25.3823	40.8601		6.35794	4.75674	7.17538
0.490764	0.0565765	0.0684754	0.0942414		76.4566	25.4504	40.8789		6.40254	4.76796	7.01087
0.491181	0.0569572	0.0683119	0.0938913		76.4697	25.41	41.2266		6.35877	4.74264	7.082
0.491598	0.0565999	0.0687171	0.0942071		76.5434	25.4583	41.1337		6.34202	4.74387	7.0031
0.492014	0.0570797	0.0684068	0.0938625		76.61	25.2673	41.2394		6.37802	4.76763	7.13447
0.492431	0.05698	0.0689366	0.0944117		76.6853	25.2764	41.0402		6.3859	4.75612	7.01477
0.492848	0.0567874	0.0685796	0.0935503		76.8563	25.1483	41.1782		6.38535	4.73822	7.03404
0.493264	0.0569097	0.0686453	0.0943204		76.9157	25.4062	41.3654		6.38701	4.74502	7.11382
0.493681	0.0565177	0.0685606	0.0936734		76.947	25.2557	41.6737		6.42054	4.79846	7.10147
0.494098	0.0570256	0.0690042	0.0944539		76.9927	25.4433	41.4401		6.42846	4.80719	7.21422
0.494514	0.0568376	0.0685679	0.094011		77.1026	25.529	41.5068		6.41823	4.79137	7.17806
0.494931	0.0573951	0.0689845	0.0943131		77.1731	25.2984	41.7824		6.43344	4.80946	7.16043
0.495348	0.0569333	0.068439	0.0941523		77.2285	25.2979	41.5045		6.41726	4.81276	7.04146
0.495764	0.0568872	0.0688553	0.0942922		77.3256	25.3043	41.6271		6.3974	4.77483	7.05087
0.496181	0.0570271	0.0687705	0.0939535		77.3753	25.3357	41.6032		6.37371	4.75431	7.19989
0.496598	0.0577404	0.0685484	0.0940177		77.5465	25.401	41.8738		6.36851	4.77133	7.14386
0.497014	0.0570886	0.0688583	0.0943621		77.5497	25.5175	41.5161		6.35918	4.76801	7.03044
0.497431	0.0572021	0.0685598	0.0942094		77.7187	25.1559	41.5494		6.34056	4.77336	6.95864
0.497848	0.0570461	0.0690324	0.0936589		77.7149	25.2667	41.6181		6.33478	4.79714	6.92577
0.498264	0.0567764	0.0686709	0.0943798		77.8624	25.2256	41.5367		6.33586	4.81725	7.07796
0.498681	0.0570893	0.0691808	0.0940333		77.9321	25.2348	41.8129		6.35003	4.79095	6.88577
0.499098	0.0571828	0.0687869	0.0941424		77.9765	25.4922	41.6879		6.35916	4.77527	6.94391
0.499514	0.0570813	0.0691459	0.0940521		78.0841	25.3614	41.4828		6.34559	4.74319	7.05443
0.499931	0.0569816	0.0690575	0.0940998		78.1353	25.4106	41.9577		6.398	4.74476	7.41735
0.500348	0.0573827	0.069053	0.0945535		78.2252	25.6123	41.7481		6.39647	4.73693	7.08643
0.500764	0.0574211	0.0691139	0.0939637		78.317	25.6767	41.8116		6.41526	4.77123	7.03487
0.501181	0.0571376	0.0695578	0.0942144		78.3691	25.5956	41.8896		6.40306	4.77829	6.81277
0.501598	0.0576161	0.0688898	0.0943984		78.4941	25.3526	41.792		6.46445	4.73164	6.90615
0.502014	0.0575928	0.0689583	0.0939011		78.569	25.4784	42.1682		6.39949	4.72417	6.80864
0.502431	0.0573068	0.0692883	0.0941232		78.6568	25.7233	42.4206		6.41365	4.7437	7.20261
0.502848	0.0573185	0.0694208	0.0943427		78.7386	25.791	42.2366		6.35889	4.74482	7.15174
0.503264	0.0573566	0.0691779	0.0942327		78.7343	25.6247	42.4052		6.34363	4.76344	7.02601
0.503681	0.0573104	0.0692244	0.0941614		78.8078	25.4915	42.3902		6.33921	4.76492	6.80135
0.504098	0.0578287	0.0690505	0.0946053		79.05	25.5283	42.4053		6.3498	4.73483	6.94809
0.504514	0.0572935	0.0692799	0.0938702		79.1114	25.481	42.3704		6.3835	4.71995	6.79595
0.504931	0.0571424	0.0688369	0.0938644		79.1275	25.4732	42.4077		6.40667	4.74209	6.76059
0.505348	0.0574756	0.0692375	0.0933265		79.2265	25.4241	42.125		6.42408	4.78569	6.79653
0.505764	0.0577124	0.0689486	0.0933677		79.317	25.6707	42.2186		6.33958	4.76997	6.82234
0.506181	0.0572047	0.0697189	0.0942936		79.3969	25.7635	42.1274		6.33291	4.77878	7.08787
0.506598	0.0578707	0.0689278	0.0938017		79.4467	25.6059	42.1976		6.32508	4.77581	6.91131
0.507014	0.0575387	0.068704	0.0944724		79.5514	25.7037	42.5611		6.36416	4.75744	7.12725
0.507431	0.0578101	0.0691764	0.0940448		79.5422	25.6408	42.2612		6.40836	4.76992	6.96025
0.507848	0.057483	0.0690285	0.0942095		79.6871	25.6877	42.1478		6.30086	4.77993	6.949
0.508264	0.0574367	0.0691394	0.0941099		79.8056	25.73	42.4543		6.33207	4.80052	6.95068
0.508681	0.0576181	0.0691092	0.0951424		79.8425	25.6761	42.6916		6.37554	4.78294	7.21464
0.509098	0.0577585	0.0688234	0.0944167		79.9223	25.5984	42.376		6.37005	4.7909	7.12703
0.509514	0.0573807	0.0691771	0.0943063		80.009	25.4266	42.3814		6.27768	4.77981	6.98923
0.509931	0.0575808	0.0688833	0.0946554		80.1702	25.5539	42.6725		6.32061	4.80402	7.04134
0.510348	0.0578537	0.0690712	0.094087		80.1826	25.5746	42.4474		6.3231	4.7511	7.17227
0.510764	0.0572945	0.068989	0.094242		80.2279	25.669	42.3857		6.28684	4.78825	7.01922
0.511181	0.0572456	0.0691406	0.0942452		80.3336	25.4702	42.6095		6.29018	4.78201	6.95657
0.511598	0.0574165	0.0688642	0.0942715		80.4617	25.3589	42.7219		6.34738	4.80971	6.97223
0.512014	0.0578449	0.0688602	0.0938323		80.4902	25.6263	42.8113		6.31647	4.78771	6.98926
0.512431	0.0574349	0.0691744	0.0946893		80.5726	25.6863	42.7418		6.28991	4.77653	7.02448
0.512848	0.0572835	0.0691083	0.0938477		80.6137	25.6883	42.8652		6.28534	4.79947	7.18264
0.513264	0.0574503	0.0686266	0.0935721		80.7149	26.0122	43.0716		6.29367	4.76358	6.9749
0.513681	0.057837	0.0688549	0.0944952		80.8056	25.6457	43.0881		6.33119	4.76655	6.95231
0.514098	0.0571403	0.0687758	0.0940383		80.9277	25.6627	43.0896		6.31766	4.79011	7.1299
0.514514	0.0576471	0.0689025	0.0940165		81.0319	25.7784	42.9881		6.31248	4.79612	7.12873
0.514931	0.0578533	0.0688944	0.0940525		81.0966	25.6026	42.7757		6.30368	4.75762	6.94404
0.515348	0.0580154	0.0692852	0.0939712		81.2116	25.683	43.2693		6.27108	4.75368	6.76804
0.515764	0.05764	0.0689201	0.0941681		81.3402	25.7975	43.0199		6.29211	4.76964	6.84001
0.516181	0.0578637	0.0687865	0.0940475		81.3618	25.7053	43.0741		6.33085	4.77485	6.87871
0.516598	0.0574337	0.0686993	0.0943416		81.3525	25.6134	42.7886		6.33207	4.76555	6.94928
0.517014	0.0571584	0.0691077	0.0936232		81.4043	25.4921	43.1062		6.32728	4.80294	7.10049
0.517431	0.0578464	0.0687178	0.0942753		81.5651	25.5734	43.2712		6.34829	4.80159	7.01897
0.517848	0.0575006	0.0692585	0.0940601		81.6463	25.7423	43.3813		6.36502	4.77757	6.98193
0.518264	0.0572786	0.0688561	0.094183		81.7053	25.7327	43.2207		6.34509	4.77734	6.9035
0.518681	0.0576318	0.0689635	0.0942898		81.8114	25.7567	43.3359		6.29792	4.79507	6.87867
0.519098	0.0575416	0.0687948	0.0949195		81.8072	25.8089	43.458		6.29845	4.77889	6.93546
0.519514	0.0575867	0.0690004	0.094937		81.9198	25.6999	43.6669		6.26896	4.77481	6.84238
0.519931	0.0574015	0.0688539	0.0945312		82.055	25.9145	43.4112		6.47032	4.81133	6.8879
0.520348	0.0576536	0.0687464	0.0941394		82.0586	25.748	43.2451		6.27216	4.83104	6.79411
0.520764	0.0577261	0.0691529	0.0946184		82.1364	25.6674	43.3068		6.21307	4.77231	6.90178
0.521181	0.0576975	0.0687727	0.0937281		82.1841	25.6751	43.5746		6.23032	4.74911	7.07931
0.521598	0.057639	0.0690881	0.094286		82.2386	25.6867	43.5369		6.21826	4.77088	6.90316
0.522014	0.0573568	0.0685896	0.0947841		82.4059	25.5436	43.5508		6.25102	4.75449	7.11458
0.522431	0.0577165	0.0690337	0.0944421		82.4543	25.811	43.6519		6.29373	4.76918	6.97828
0.522848	0.0574048	0.0688307	0.0943703		82.5387	25.8177	43.6344		6.26429	4.76859	6.81107
0.523264	0.0574226	0.0689928	0.0946082		82.5745	25.7612	43.6105		6.27664	4.7754	6.94861
0.523681	0.0582312	0.069262	0.0948665		82.6929	25.9705	43.8628		6.25144	4.76577	6.93421
0.524098	0.0577014	0.0687669	0.0945564		82.7834	25.9198	43.689		6.26218	4.73477	6.84833
0.524514	0.0572508	0.0689799	0.0944703		82.8497	25.879	43.9225		6.31686	4.7657	6.76887
0.524931	0.0576439	0.0695298	0.0948542		82.956	25.5178	43.7891		6.21809	4.80283	6.95541
0.525348	0.0576707	0.068759	0.0947869		83.0443	25.6693	43.9085		6.25718	4.80626	6.95763
0.525764	0.0574658	0.0690013	0.0941777		83.0404	25.7367	43.7631		6.19163	4.76774	7.01088
0.526181	0.0578481	0.0690553	0.0941369		83.228	25.6775	43.9393		6.24174	4.78912	6.99975
0.526598	0.057085	0.0688157	0.0940002		83.2111	25.7745	43.8321		6.23467	4.81403	7.00225
0.527014	0.0573977	0.0687709	0.0947793		83.3327	25.9669	43.8961		6.21379	4.75785	6.90722
0.527431	0.057662	0.0689868	0.0944989		83.3774	25.8936	44.0197		6.2131	4.73784	7.04388
0.527848	0.0575119	0.0689958	0.0951377		83.4386	25.8872	43.9621		6.2306	4.7761	6.95164
0.528264	0.057286	0.0690862	0.0945666		83.5943	25.8453	44.083		6.20674	4.81946	6.98583
0.528681	0.058117	0.0690056	0.0939369		83.6522	25.7483	44.0578		6.19232	4.80582	6.84435
0.529098	0.0575113	0.0690367	0.0948982		83.7325	25.7134	43.9733		6.19082	4.79226	7.08279
0.529514	0.0574236	0.0691042	0.0941883		83.7386	25.9309	44.0694		6.21821	4.82889	7.09495
0.529931	0.0579434	0.0692053	0.0940898		83.9552	25.8928	44.2591		6.23912	4.80368	6.9144
0.530348	0.0575974	0.0688004	0.0946923		84.0162	25.7167	44.3169		6.22532	4.77215	7.12025
0.530764	0.0574327	0.0688406	0.0941958		83.9658	25.6565	44.2889		6.22314	4.80334	6.97596
0.531181	0.0577878	0.0686584	0.0944705		84.0813	25.7804	44.3818		6.2166	4.82406	7.00048
0.531598	0.0575873	0.0690932	0.0944215		84.1545	25.6439	44.5641		6.23287	4.79446	7.14921
0.532014	0.057649	0.0691253	0.094355		84.2912	25.6383	44.4665		6.19497	4.80493	6.89847
0.532431	0.057603	0.0689478	0.094458		84.3947	25.9052	44.1735		6.23506	4.81815	6.92338
0.532848	0.0577445	0.0690265	0.0943445		84.4088	26.0397	44.3398		6.21499	4.78345	6.98235
0.533264	0.0574698	0.0688174	0.0945555		84.475	25.9031	44.3324		6.21814	4.77041	6.87888
0.533681	0.0577223	0.0692336	0.0945447		84.6113	26.0155	44.3538		6.23378	4.77154	7.02238
0.534098	0.0584385	0.0689345	0.0951152		84.681	25.9387	44.3124		6.2768	4.79057	7.17337
0.534514	0.0578249	0.0691268	0.0941502		84.6426	25.9357	44.7765		6.23193	4.79808	6.81596
0.534931	0.0577239	0.0692894	0.0944378		84.8003	25.9761	44.9098		6.18641	4.78503	6.81883
0.535348	0.0576396	0.069244	0.0944887		84.9374	25.8643	44.7589		6.19771	4.8342	6.8761
0.535764	0.0577068	0.0691386	0.0947126		84.9876	25.8049	44.6493		6.20077	4.81108	6.89014
0.536181	0.0578477	0.0692292	0.094815		85.0362	25.9376	44.882		6.23139	4.79592	6.8668
0.536598	0.0578232	0.0689262	0.0946249		85.0787	25.9441	44.828		6.2419	4.78581	6.83202
0.537014	0.0576372	0.0689708	0.0946802		85.1962	25.8697	44.5851		6.22641	4.79965	7.11721
0.537431	0.057988	0.0691488	0.0946212		85.2446	25.9293	44.8738		6.24853	4.81413	7.18928
0.537848	0.0579295	0.0690179	0.0947347		85.3567	25.9647	44.722		6.22284	4.79063	6.91313
0.538264	0.0582722	0.0691518	0.0947861		85.4367	25.9916	44.7135		6.17771	4.78331	6.77022
0.538681	0.0579121	0.0692669	0.0954501		85.5631	25.9451	44.7437		6.2002	4.78153	6.94079
0.539098	0.0573666	0.0693387	0.0951377		85.6372	26.034	45.1256		6.23909	4.80052	6.90748
0.539514	0.0581487	0.0691467	0.0947995		85.6795	25.9081	45.047		6.20206	4.78303	6.93988
0.539931	0.0580052	0.0692515	0.0949817		85.713	25.971	44.8829		6.21811	4.77948	6.82034
0.540348	0.0577579	0.069105	0.0945062		85.7863	26.0623	44.8373		6.21409	4.78283	7.04536
0.540764	0.0585118	0.0695657	0.0947775		85.7984	26.1496	44.9719		6.22184	4.77654	6.93499
0.541181	0.0578251	0.0692953	0.0951719		85.9418	26.179	45.0043		6.21822	4.7889	7.00606
0.541598	0.0579439	0.0694314	0.0945396		85.9268	25.9639	45.0765		6.20355	4.81085	6.761
0.542014	0.0578668	0.0691433	0.0949169		86.0099	25.785	44.9701		6.19581	4.77361	7.11188
0.542431	0.0581005	0.0691625	0.0942863		86.1588	25.9823	45.0872		6.16334	4.76787	7.00957
0.542848	0.0580298	0.0695098	0.0947215		86.2032	26.1426	44.802		6.19337	4.75612	7.01469
0.543264	0.0575993	0.069443	0.0944816		86.308	26.1911	45.0871		6.20967	4.80311	6.84511
0.543681	0.0582687	0.0693698	0.0945491		86.3706	26.1988	45.4185		6.15046	4.80588	6.92603
0.544098	0.0583064	0.069482	0.0947832		86.411	26.1512	45.3808		6.17643	4.78622	6.95273
0.544514	0.0585191	0.0694131	0.0946413		86.4883	26.0144	45.443		6.14568	4.78546	6.8535
0.544931	0.0581501	0.0693501	0.094583		86.5724	25.8892	45.2084		6.15561	4.7868	6.87141
0.545348	0.058186	0.0692326	0.0945136		86.643	26.0267	45.5448		6.19708	4.75083	6.95834
0.545764	0.0581025	0.0692765	0.0946557		86.7532	26.0921	45.1703		6.17512	4.76257	6.88755
0.546181	0.0584413	0.0693438	0.0945953		86.8683	26.1779	45.098		6.17695	4.7943	6.83582
0.546598	0.0581479	0.069481	0.0942254		86.9827	26.1841	45.3784		6.18155	4.77212	6.9099
0.547014	0.0579176	0.0695172	0.0939472		86.9896	26.1795	45.5515		6.20182	4.79837	6.82708
0.547431	0.0581197	0.0692366	0.09514		87.034	26.0697	45.888		6.17552	4.83316	7.03533
0.547848	0.0584539	0.0695732	0.0951551		87.0691	25.9723	45.5731		6.20666	4.81923	6.72616
0.548264	0.0583339	0.0694567	0.0946149		87.1523	26.1642	45.5231		6.19979	4.8152	6.96886
0.548681	0.0587361	0.0693752	0.0945677		87.2516	26.1805	45.7842		6.16249	4.80193	6.75296
0.549098	0.0583635	0.069754	0.0947499		87.2863	26.1958	45.5293		6.18685	4.79873	6.82439
0.549514	0.0577318	0.0690423	0.094755		87.4853	26.1316	45.8289		6.19823	4.81175	6.8926
0.549931	0.058137	0.069538	0.0950598		87.5708	26.1612	45.6645		6.18244	4.77996	6.74427
0.550348	0.0578912	0.0695704	0.0944926		87.5591	25.9499	45.7672		6.1389	4.74399	6.74954
0.550764	0.0583965	0.0693055	0.0944335		87.5927	25.8127	45.6396		6.11621	4.75368	6.87577
0.551181	0.0581342	0.0697007	0.0950093		87.6692	25.9074	46.0367		6.16374	4.77361	6.85498
0.551598	0.0580746	0.069651	0.0946009		87.7911	25.9056	46.017		6.1852	4.76528	6.99043
0.552014	0.0583845	0.0693718	0.0945159		87.8446	25.9948	45.661		6.15613	4.80486	6.90367
0.552431	0.0586741	0.0693413	0.0950114		87.9092	26.1491	46.2542		6.16814	4.84738	6.68634
0.552848	0.058102	0.0694385	0.0950333		88.0168	26.2588	46.0565		6.20829	4.83669	6.71503
0.553264	0.0588213	0.0693902	0.0949763		88.0579	26.1462	45.8749		6.1555	4.80342	6.66196
0.553681	0.05824	0.0694548	0.0949821		88.1161	26.0039	46.045		6.15849	4.80704	6.85748
0.554098	0.0582484	0.069583	0.0952929		88.2083	26.2468	46.1543		6.17578	4.80756	6.86209
0.554514	0.0582891	0.069453	0.0951486		88.3467	26.3648	46.1601		6.18383	4.80233	6.90883
0.554931	0.0582683	0.0696531	0.0951192		88.4472	26.1923	46.1548		6.14732	4.80964	6.83925
0.555348	0.0586106	0.069344	0.0945569		88.4933	26.1068	46.3061		6.14333	4.82631	6.83135
0.555764	0.0588381	0.0700008	0.0950975		88.504	26.2164	46.27		6.1476	4.83027	6.7604
0.556181	0.0586404	0.0695811	0.0945231		88.6017	26.2347	46.5036		6.15317	4.7807	6.70436
0.556598	0.0589059	0.0698665	0.0948152		88.6719	26.0197	46.2788		6.10806	4.74593	6.69753
0.557014	0.058227	0.069607	0.0945434		88.777	26.0152	46.4816		6.16366	4.81966	6.71142
0.557431	0.0584566	0.0695266	0.0949005		88.8535	26.3164	46.0804		6.11877	4.80135	6.88911
0.557848	0.0583965	0.0695924	0.094878		88.877	26.3953	46.2782		6.14023	4.79247	6.92249
0.558264	0.05808	0.0694003	0.0949193		88.9421	26.397	46.3696		6.20702	4.80332	6.68558
0.558681	0.0580819	0.0691251	0.0948506		88.99	26.1839	46.481		6.14583	4.80091	6.98963
0.559098	0.0586946	0.0692979	0.0946419		89.214	26.0362	46.9265		6.153	4.80123	6.87836
0.559514	0.0584531	0.0696072	0.0947164		89.1793	26.1433	46.8069		6.13465	4.80336	6.74672
0.559931	0.0583468	0.0692482	0.0953063		89.239	26.0968	46.7454		6.13398	4.83746	6.65555
0.560348	0.0587168	0.0691958	0.0952526		89.2913	26.3058	46.5437		6.09714	4.82576	6.63852
0.560764	0.0581562	0.0694409	0.0951521		89.3256	26.2393	46.8871		6.16001	4.81061	6.7491
0.561181	0.0585955	0.0694293	0.0953012		89.461	26.2196	46.6494		6.16341	4.78488	6.77045
0.561598	0.0584178	0.0690028	0.0947305		89.4914	26.1867	46.6392		6.1402	4.79831	6.70067
0.562014	0.0587067	0.069239	0.0949101		89.5685	26.2425	46.701		6.1381	4.81017	6.70912
0.562431	0.0584184	0.069268	0.095287		89.6695	26.2732	46.8778		6.17519	4.78144	6.74937
0.562848	0.0589043	0.0692962	0.0946562		89.7243	26.2928	46.8347		6.11753	4.79438	6.56262
0.563264	0.0583803	0.069623	0.0950905		89.8407	26.2641	46.4819		6.10323	4.81907	6.66452
0.563681	0.0585759	0.0697076	0.0951204		89.9054	26.2818	46.8564		6.0999	4.78189	6.97169
0.564098	0.0583769	0.0693475	0.0953975		90.0279	26.2891	47.1662		6.09099	4.78496	6.81705
0.564514	0.0585698	0.0697088	0.0948176		90.0512	26.185	46.9184		6.12761	4.84426	6.64631
0.564931	0.0588981	0.0697187	0.0953042		90.1435	25.9626	47.0602		6.0867	4.82374	6.6866
0.565348	0.0579628	0.0697198	0.0955827		90.2171	26.1684	46.956		6.06945	4.78085	6.68707
0.565764	0.058645	0.0692141	0.0949436		90.1968	26.0016	47.241		6.12551	4.79582	6.75003
0.566181	0.0586162	0.0696597	0.0952924		90.3088	26.1387	47.2643		6.11721	4.80238	6.61936
0.566598	0.058272	0.0690394	0.0955809		90.382	26.2597	47.0546		6.0931	4.78448	6.65439
0.567014	0.0583344	0.0691593	0.0954689		90.4331	26.2938	47.2681		6.12347	4.77953	6.75259
0.567431	0.0584015	0.0691677	0.0953155		90.4986	26.2189	47.2269		6.11471	4.78433	6.72668
0.567848	0.0584657	0.0696217	0.0948875		90.4676	26.2001	47.3179		6.08937	4.77759	6.98839
0.568264	0.0580205	0.0692903	0.0957078		90.6023	26.3144	47.2832		6.08565	4.79501	6.85242
0.568681	0.0585584	0.0693248	0.0950465		90.6922	26.3466	47.3494		6.11864	4.82694	6.72895
0.569098	0.0581711	0.0693637	0.0952281		90.8121	26.3834	47.3997		6.145	4.82539	6.97225
0.569514	0.058369	0.0690678	0.0948506		90.8926	26.2739	47.5481		6.0906	4.77968	6.8066
0.569931	0.0584544	0.0693739	0.0954756		90.9499	26.4822	47.3836		6.07061	4.78859	6.88294
0.570348	0.0584088	0.0694084	0.0951361		90.9813	26.4635	47.5709		6.05852	4.80651	6.68931
0.570764	0.0584783	0.0691656	0.0952287		91.0205	26.5426	47.6826		6.07233	4.81959	6.78593
0.571181	0.0587013	0.0693434	0.0949584		91.1024	26.4024	47.5806		6.06251	4.80504	6.66586
0.571598	0.0579772	0.0693489	0.0951117		91.1963	26.1162	47.5902		6.08314	4.82526	6.92
0.572014	0.0584095	0.0691357	0.0952527		91.2382	26.174	47.5719		6.09207	4.80884	6.84157
0.572431	0.0587295	0.0691557	0.0951777		91.3022	26.2433	47.3741		6.08337	4.81681	6.85283
0.572848	0.0584022	0.0693807	0.0952046		91.3082	26.4078	47.5046		6.08509	4.75779	6.7638
0.573264	0.0583567	0.069355	0.0953807		91.4334	26.4084	47.5326		6.06153	4.80899	6.76768
0.573681	0.0581804	0.0692235	0.0948654		91.4607	26.4761	47.7371		6.0736	4.82729	6.68835
0.574098	0.0582641	0.0690372	0.0950055		91.5695	26.4067	47.6356		6.08377	4.80019	6.64798
0.574514	0.0582405	0.0693784	0.0952593		91.639	26.2942	47.8293		6.04957	4.82677	6.67912
0.574931	0.0586485	0.0691823	0.0948881		91.6263	26.3187	47.8999		6.07849	4.83967	6.67654
0.575348	0.0580678	0.0690188	0.0946228		91.7595	26.2383	48.0082		6.06936	4.8221	6.49087
0.575764	0.058821	0.0692748	0.0949881		91.7943	26.3651	48.2253		6.0249	4.77097	6.62286
0.576181	0.0585371	0.0694827	0.0944701		91.8661	26.5922	48.0643		6.05905	4.7826	6.76567
0.576598	0.0583148	0.0693005	0.0946338		91.8867	26.5338	47.8521		6.11158	4.80738	6.84724
0.577014	0.0587502	0.0690368	0.0950419		91.8998	26.5628	47.8864		6.12391	4.78047	6.70126
0.577431	0.0586048	0.0693819	0.095133		91.9365	26.5296	47.9881		6.06963	4.77939	6.62949
0.577848	0.0584635	0.0696111	0.0951953		92.1632	26.3969	48.2474		6.05446	4.80525	6.85573
0.578264	0.0581823	0.0696494	0.0948393		92.2372	26.3165	48.33		6.06696	4.79829	6.90916
0.578681	0.0579136	0.0691949	0.095493		92.261	26.3928	48.2125		6.04251	4.79185	6.60541
0.579098	0.0581828	0.0696138	0.0951707		92.2814	26.3034	48.5309		6.0649	4.81495	6.46017
0.579514	0.0580225	0.0693878	0.0952595		92.3923	26.411	48.2807		6.0438	4.83888	6.59086
0.579931	0.0585125	0.0694451	0.0947564		92.4759	26.4035	48.2949		6.05126	4.82942	6.53533
0.580348	0.0582468	0.0694011	0.0946001		92.5613	26.3279	48.316		6.06714	4.79966	6.70417
0.580764	0.0580851	0.0692263	0.0952636		92.5907	26.5185	48.5172		6.05581	4.81048	6.86298
0.581181	0.0585284	0.0694235	0.0947795		92.6254	26.6114	48.2795		6.08684	4.80704	6.74926
0.581598	0.0582995	0.0693642	0.095226		92.6237	26.5968	48.2849		6.08062	4.80196	6.74677
0.582014	0.0586019	0.0695001	0.0948823		92.8196	26.652	48.6459		6.02216	4.80104	6.61636
0.582431	0.0581755	0.0692504	0.0956193		92.8458	26.844	48.529		6.04519	4.76739	6.80388
0.582848	0.0582619	0.0697271	0.0954033		93.0007	26.6053	48.7092		6.03177	4.78747	6.83212
0.583264	0.0583365	0.0693181	0.0954516		93.0114	26.6525	48.554		6.02748	4.81496	6.78745
0.583681	0.0585063	0.0697322	0.0950486		93.0404	26.4488	48.4076		6.00708	4.80084	6.84361
0.584098	0.0585668	0.0695185	0.0950585		93.0691	26.4155	48.7157		6.02831	4.81832	6.78917
0.584514	0.0585137	0.0696529	0.0954795		93.169	26.4462	48.7458		6.04646	4.85696	6.74742
0.584931	0.058419	0.0696599	0.0950874		93.2012	26.4786	49.0001		6.05331	4.80299	6.82103
0.585348	0.0579123	0.069491	0.0953613		93.2763	26.6545	48.6954		6.0417	4.76935	6.76179
0.585764	0.0579403	0.0692243	0.0948515		93.2943	26.6151	48.7236		6.06684	4.7974	6.76092
0.586181	0.0587788	0.0698012	0.095197		93.3774	26.4693	48.6636		6.06997	4.7995	6.70454
0.586598	0.0584631	0.0691941	0.0957619		93.5219	26.4996	48.7994		6.0432	4.79414	6.81114
0.587014	0.0583013	0.0693126	0.0952945		93.6471	26.5204	48.7473		6.0293	4.79251	6.66153
0.587431	0.0587458	0.0695957	0.0953003		93.595	26.7514	48.7789		6.02068	4.79995	6.56204
0.587848	0.058913	0.0695498	0.0956493		93.6702	26.7156	48.6537		6.01784	4.79267	6.61928
0.588264	0.0580053	0.0695725	0.0951798		93.75	26.6107	48.6806		6.01661	4.77765	6.82139
0.588681	0.0589784	0.0694794	0.0956042		93.7953	26.3536	48.8901		6.03945	4.80074	6.78031
0.589098	0.0586198	0.0696724	0.095067		93.8377	26.4924	48.9184		6.03274	4.8226	6.84254
0.589514	0.0589944	0.0700472	0.0953837		93.8063	26.4799	49.3053		6.01239	4.80061	6.7973
0.589931	0.0585516	0.0696961	0.0953925		93.9315	26.5439	49.5414		5.99819	4.77038	6.93592
0.590348	0.0588604	0.0697296	0.0950998		94.0932	26.5038	49.4984		6.06103	4.84693	6.71887
0.590764	0.0588589	0.0693029	0.0956314		94.1848	26.5922	49.4419		6.04377	4.84738	6.67401
0.591181	0.0589793	0.0696795	0.0951517		94.1823	26.7947	49.4262		6.00726	4.82752	6.72778
0.591598	0.058784	0.0699273	0.0953305		94.2267	26.7277	49.6319		6.01314	4.83585	6.80327
0.592014	0.0588744	0.0696295	0.0950113		94.2685	26.6862	49.3926		5.96694	4.83497	6.65895
0.592431	0.0587479	0.0697661	0.0953857		94.2983	26.5398	49.4254		5.97703	4.82132	6.57175
0.592848	0.0587413	0.0695781	0.0954384		94.3291	26.5481	49.6366		5.96858	4.79215	6.62347
0.593264	0.0587346	0.0694327	0.0952958		94.4343	26.5103	49.6371		5.95218	4.79768	6.53374
0.593681	0.0585976	0.0696223	0.0949238		94.5251	26.7518	49.5983		5.97197	4.79436	6.47487
0.594098	0.059012	0.0697851	0.0950282		94.6088	26.7112	49.5547		5.96469	4.76094	6.71047
0.594514	0.0587156	0.0694777	0.0952309		94.5733	26.6112	49.5871		5.99188	4.76763	6.96722
0.594931	0.059089	0.0700849	0.0947448		94.7555	26.4861	49.7474		6.02055	4.80779	6.80192
0.595348	0.0590129	0.0697793	0.0952191		94.7071	26.8113	49.7047		6.01774	4.75152	6.86322
0.595764	0.0584738	0.0697854	0.0947002		94.7723	26.4927	49.8057		5.99506	4.73853	6.9963
0.596181	0.059142	0.0702384	0.0952576		94.8208	26.5601	49.9077		5.96837	4.78839	6.84414
0.596598	0.058714	0.0694243	0.0952337		94.8945	26.7113	49.8546		5.98931	4.78979	6.81143
0.597014	0.0591122	0.0699988	0.094748		94.9863	26.5766	49.9061		5.96862	4.77074	6.68455
0.597431	0.0588939	0.0698492	0.0947362		95.0157	26.8394	49.878		5.98282	4.77159	6.68469
0.597848	0.0592048	0.0699921	0.0952653		95.0717	26.5361	49.9152		6.00183	4.79647	6.81602
0.598264	0.0587859	0.0699114	0.0950275		95.1508	26.6122	50.0595		6.00525	4.8073	6.95772
0.598681	0.0587948	0.0696829	0.0952101		95.2485	26.5334	49.8455		6.00328	4.81377	6.73185
0.599098	0.0587499	0.0696625	0.0954079		95.3373	26.613	50.3631		5.97867	4.81593	6.85861
0.599514	0.0588003	0.0702025	0.0947556		95.2973	26.5084	50.1188		5.97792	4.84454	6.82279
0.599931	0.0590031	0.0693764	0.0949161		95.4212	26.6075	50.0513		5.96142	4.8132	6.67394
0.600348	0.0589693	0.0698508	0.0949903		95.5024	26.7998	50.0993		6.01353	4.77464	6.70403
0.600764	0.059095	0.0695375	0.0947808		95.5892	26.7835	50.1742		6.02105	4.77311	6.75584
0.601181	0.0591646	0.0695195	0.095286		95.6124	26.4983	50.3236		6.00712	4.74691	6.67328
0.601598	0.0593315	0.0694004	0.0953204		95.6179	26.6211	50.2737		6.03745	4.7445	6.63947
0.602014	0.0592145	0.0694889	0.0952056		95.7193	26.6791	50.5106		6.03122	4.76628	6.83666
0.602431	0.0586359	0.0693127	0.0953192		95.7721	26.6981	50.6039		5.96927	4.78977	6.68752
0.602848	0.0590205	0.0694504	0.0948519		95.8122	26.941	50.6251		5.99205	4.79325	6.52923
0.603264	0.0589689	0.0695902	0.0952193		95.8699	26.8938	50.4849		6.0027	4.77062	6.78192
0.603681	0.0586943	0.0695797	0.0952091		95.8362	26.7061	50.5302		5.97596	4.80914	6.80523
0.604098	0.058777	0.0696867	0.0953529		95.9007	26.7246	50.5178		5.97838	4.83758	6.65783
0.604514	0.0590711	0.069517	0.0952789		95.9613	27.0111	50.7118		5.97467	4.81502	6.73533
0.604931	0.0590684	0.0698496	0.0952029		95.9575	26.6493	50.936		5.99961	4.78579	6.60768
0.605348	0.0589991	0.0697584	0.0952653		96.0919	26.4346	50.7716		6.02158	4.78107	6.73926
0.605764	0.0585893	0.069427	0.0950095		96.1614	26.566	51.1263		6.00802	4.84483	6.62345
0.606181	0.0589734	0.0694242	0.0955702		96.2317	26.8042	50.9929		5.97655	4.82309	6.74826
0.606598	0.0588355	0.0692991	0.0957046		96.2661	26.5601	50.9247		5.98019	4.75788	6.80971
0.607014	0.0586905	0.0694419	0.0953407		96.2773	26.4164	50.9918		5.97642	4.76202	6.56989
0.607431	0.0591399	0.0696298	0.0950246		96.3231	26.7309	51.0037		5.97488	4.77766	6.61187
0.607848	0.059314	0.0697458	0.0954175		96.3783	26.8765	51.0392		5.94704	4.74426	6.54014
0.608264	0.0588843	0.0696971	0.0957532		96.4589	26.8339	51.1227		5.94652	4.70786	6.70995
0.608681	0.0587108	0.0698466	0.0953112		96.4708	26.7367	50.858		5.99707	4.78462	6.72456
0.609098	0.0589761	0.0692219	0.0953642		96.5921	26.7433	50.9418		6.02813	4.80803	6.79134
0.609514	0.0585661	0.0694828	0.0951061		96.5961	26.8353	51.2584		5.97307	4.76618	6.47438
0.609931	0.0587911	0.0693777	0.0954246		96.6568	26.767	51.1541		5.94385	4.73413	6.6744
0.610348	0.058758	0.0693757	0.0951978		96.7331	26.8043	51.0659		5.95125	4.76718	6.65909
0.610764	0.058121	0.0696747	0.0954713		96.7064	26.877	51.0005		5.96072	4.77766	6.74132
0.611181	0.0587699	0.0693447	0.0955172		96.7342	26.8224	51.2443		5.93482	4.79695	6.753
0.611598	0.0584806	0.0694827	0.0953153		96.8473	26.7157	51.3646		5.95384	4.83797	6.67965
0.612014	0.0591748	0.0694255	0.0950669		97.0125	26.7101	51.431		5.95009	4.84904	6.74664
0.612431	0.0590574	0.0697152	0.0956925		96.9937	26.7412	51.193		5.97233	4.80164	6.60837
0.612848	0.0585622	0.0692383	0.0953985		97.0256	26.4637	51.0784		6.09289	4.76833	6.52537
0.613264	0.0586515	0.0695316	0.095337		97.0214	26.5249	51.3792		6.01885	4.77381	6.6526
0.613681	0.0586601	0.069531	0.0947572		97.3357	26.6806	51.2574		5.95169	4.8054	6.6468
0.614098	0.058972	0.0695605	0.0952103		97.3378	27.0075	51.2716		5.94322	4.7999	6.67617
0.614514	0.0585721	0.0691638	0.0954275		97.1696	26.7902	53.0874		5.94078	4.82933	6.87899
0.614931	0.0588755	0.0696316	0.095702		97.0027	24.856	48.2333		6.99765	4.87734	6.8387
0.615348	0.0584235	0.0693252	0.0953837		96.8925	23.9512	46.2789		9.37992	6.20652	6.76165
0.615764	0.0585109	0.069473	0.0952483		96.7743	23.5854	45.3424		9.06031	5.62521	6.88965
0.616181	0.0591385	0.0692853	0.0952834		96.8276	23.4594	44.8435		8.85297	5.32453	6.84163
0.616598	0.0589242	0.0695029	0.0952376		96.6286	23.4357	44.4549		8.82271	5.27724	6.88331
0.617014	0.0584973	0.0694687	0.0957609		96.4465	23.3567	44.0831		8.68401	5.19586	6.79721
0.617431	0.0583567	0.0694338	0.0953514		96.3455	23.3504	43.7727		8.63064	5.16521	6.89494
0.617848	0.0588566	0.0693276	0.0953018		96.2624	23.3457	43.5957		8.52342	5.12084	6.8753
0.618264	0.058567	0.0694569	0.0954828		96.1586	23.2858	43.2845		8.37179	5.12491	7.01237
0.618681	0.0588142	0.0694924	0.0952861		96.1857	23.2967	43.0663		8.3843	5.14322	6.75998
0.619098	0.0587783	0.0694412	0.0951823		96.0651	23.2739	42.8754		8.41383	5.11492	6.97129
0.619514	0.0590226	0.069528	0.0956754		96.0637	23.2493	42.7198		8.35634	5.10164	6.93132
0.619931	0.0586223	0.0691743	0.0951803		96.019	23.2606	42.5402		8.31615	5.07987	6.95874
0.620348	0.0591565	0.0691805	0.0953315		96.0677	23.273	42.4157		8.3095	5.06043	6.75095
0.620764	0.0588719	0.0692587	0.0956746		96.0425	23.269	42.3148		8.33905	5.06462	6.66429
0.621181	0.0585911	0.0693313	0.0951164		96.0273	23.2756	42.1896		8.29665	5.04418	6.68935
0.621598	0.0582984	0.0690274	0.0953301		96.0595	23.3194	42.0826		8.27469	5.03208	6.80528
0.622014	0.0585804	0.0693185	0.0953297		96.093	23.3239	41.9093		8.28294	5.03784	6.81592
0.622431	0.0590077	0.0694157	0.0956844		96.1323	23.346	41.6965		8.27282	5.04326	7.08389
0.622848	0.0587699	0.0694957	0.0957201		96.0047	23.3664	41.5819		8.25204	5.04089	6.77663
0.623264	0.0589748	0.0697062	0.0953649		95.9643	23.3633	41.4751		8.21643	5.02666	6.593
0.623681	0.0594276	0.0694295	0.0956127		95.9549	23.3618	41.3932		8.18001	5.01563	6.76003
0.624098	0.0586504	0.0694141	0.0955982		95.9907	23.3893	41.3208		8.19125	5.01884	6.68435
0.624514	0.0591372	0.069771	0.0954101		96.0136	23.3966	41.2762		8.14245	4.98893	6.56331
0.624931	0.0593289	0.069563	0.095487		96.0152	23.4388	41.2383		8.1101	4.99248	6.77462
0.625348	0.0590232	0.0694934	0.0948029		96.2474	23.4781	42.0145		8.10295	4.9859	6.94993
0.625764	0.0590281	0.0696042	0.0955431		96.1043	23.6015	43.4896		8.13583	4.95761	6.8069
0.626181	0.0587351	0.0697153	0.0956543		96.0698	23.6194	43.9822		8.10151	4.91122	6.75192
0.626598	0.0584266	0.0694764	0.0952218		96.0873	23.663	44.0371		8.10301	4.89076	6.68386
0.627014	0.0593838	0.0694055	0.0953006		96.1232	23.7237	44.1815		8.07216	4.8846	6.65704
0.627431	0.0591213	0.0694972	0.0954619		96.1118	23.7518	44.1872		8.08139	4.8821	6.63556
0.627848	0.0590633	0.0694624	0.0948943		96.1089	23.7342	44.208		8.07366	4.88008	6.82052
0.628264	0.0586738	0.0697908	0.0953451		96.0955	23.7223	44.3015		8.05782	4.84531	6.73289
0.628681	0.0589558	0.0695558	0.0953894		96.209	23.7281	44.2919		8.05447	4.82687	6.59194
0.629098	0.0588872	0.0696064	0.0958342		96.2048	23.7321	44.3307		8.03177	4.83364	6.46556
0.629514	0.0591142	0.0697752	0.0952203		96.2587	23.7231	44.4315		8.03346	4.86376	6.62836
0.629931	0.0597145	0.069735	0.094966		96.2349	23.7551	44.3277		8.02756	4.85382	6.45809
0.630348	0.0590226	0.0692136	0.0953913		96.2339	23.7676	44.4131		7.9836	4.8715	6.83859
0.630764	0.0589153	0.0696521	0.0953825		96.2237	23.78	44.6443		8.01327	4.86955	6.78432
0.631181	0.0589909	0.0700563	0.0950791		96.2495	23.7881	44.6701		7.96757	4.8354	6.57975
0.631598	0.0588029	0.0695141	0.0959673		96.3045	23.7835	44.7593		7.92923	4.83539	6.6891
0.632014	0.0588239	0.0697525	0.0955701		96.3472	23.7869	44.8776		7.95768	4.86449	6.89818
0.632431	0.0582465	0.0696412	0.0954207		96.3548	23.8124	45.0065		7.8713	4.85013	6.86839
0.632848	0.0594378	0.0703069	0.095052		96.3664	23.8104	44.9508		7.82941	4.81491	6.72089
0.633264	0.0590904	0.0697312	0.0954246		96.3172	23.8217	45.0655		7.86849	4.801	6.8268
0.633681	0.0593266	0.0696522	0.0956558		96.3779	23.8312	45.1689		7.89462	4.83079	6.67705
0.634098	0.0588196	0.0699123	0.0952286		96.4221	23.8303	45.1227		7.88907	4.82814	6.72138
0.634514	0.0587601	0.069698	0.0950455		96.5054	23.8575	45.0533		7.83693	4.8084	6.79181
0.634931	0.0594917	0.0697993	0.0950474		96.446	23.8997	45.2713		7.8338	4.7814	6.63504
0.635348	0.0596619	0.0697595	0.0954503		96.4843	23.8835	45.3316		7.83296	4.80531	6.59615
0.635764	0.0595718	0.0694886	0.0954006		96.5322	23.8933	45.2995		7.80317	4.81117	6.66799
0.636181	0.0593418	0.0698104	0.0955198		96.581	23.9293	45.3064		7.80444	4.78027	6.82498
0.636598	0.0593009	0.069629	0.0957439		96.6351	23.935	45.3786		7.77858	4.79465	6.70355
0.637014	0.0591089	0.0697952	0.0955179		96.6401	23.9071	45.4136		7.75725	4.80793	6.50729
0.637431	0.0587757	0.0699618	0.0959596		96.6934	23.9132	45.4616		7.76057	4.79903	6.57993
0.637848	0.0592111	0.0699279	0.0954327		96.6348	23.9412	45.4927		7.73517	4.81862	6.57443
0.638264	0.0589746	0.0698556	0.0956952		96.6394	23.9935	45.5574		7.72478	4.80605	6.37653
0.638681	0.0594093	0.0694526	0.0958016		96.6918	24.0399	45.6271		7.70929	4.8059	6.57547
0.639098	0.0592776	0.0700145	0.0955209		96.7615	24.0113	45.6405		7.67729	4.79507	6.61927
0.639514	0.059774	0.0699129	0.0957789		96.8024	24.0225	45.6428		7.68511	4.81194	6.56782
0.639931	0.0586567	0.0695398	0.0955992		96.8791	24.0336	45.8286		7.66301	4.81255	6.60118
0.640348	0.0596359	0.0698586	0.0957849		96.8813	24.0223	45.7865		7.67527	4.83248	6.62351
0.640764	0.0593769	0.0695931	0.0950554		96.921	24.0222	45.8114		7.67594	4.79491	6.60682
0.641181	0.059246	0.0695204	0.0960164		96.8907	24.0252	45.7791		7.61865	4.81796	6.47923
0.641598	0.0592161	0.0699047	0.0951958		97.0074	24.024	45.8108		7.64076	4.87088	6.39877
0.642014	0.0593675	0.0701053	0.095318		97.0502	24.051	45.915		7.63485	4.83439	6.42016
0.642431	0.0593052	0.0698392	0.0955067		97.0843	24.0626	45.9259		7.59908	4.80468	6.4204
0.642848	0.0597963	0.0698845	0.0952495		97.0458	24.0566	45.9297		7.616	4.82076	6.63731
0.643264	0.0594015	0.0702004	0.0957625		97.0168	24.0947	45.9167		7.5988	4.80486	6.56929
0.643681	0.0595073	0.0695034	0.095541		97.109	24.1019	46.115		7.57947	4.78391	6.67839
0.644098	0.059447	0.0699468	0.0959934		97.1245	24.1113	46.0339		7.55911	4.8156	6.62081
0.644514	0.0595135	0.06996	0.0957948		97.1431	24.1268	46.0032		7.55847	4.82145	6.68982
0.644931	0.0591916	0.0699445	0.0952867		97.1632	24.1172	46.024		7.55554	4.84019	6.77128
0.645348	0.0592761	0.0698799	0.0951242		97.3275	24.1191	45.9719		7.54739	4.82017	6.68637
0.645764	0.0594972	0.0697935	0.0955717		97.3299	24.1335	46.1515		7.55044	4.81832	6.45788
0.646181	0.059314	0.069358	0.0953515		97.2785	24.1459	46.222		7.55022	4.84604	6.72213
0.646598	0.0592436	0.0701627	0.0952322		97.3022	24.1831	46.2356		7.54625	4.80088	6.73716
0.647014	0.0587284	0.0696032	0.0954012		97.366	24.2062	46.2591		7.5174	4.80558	6.77215
0.647431	0.059341	0.0700609	0.0952654		97.4024	24.2191	46.2995		7.4448	4.8071	6.4246
0.647848	0.0593739	0.069862	0.0948305		97.457	24.2425	46.2669		7.48252	4.81699	6.42107
0.648264	0.0595909	0.0700655	0.0952349		97.5326	24.2434	46.2984		7.48361	4.82176	6.5639
0.648681	0.0592601	0.0696756	0.0953794		97.5289	24.2283	46.2967		7.46132	4.81324	6.50038
0.649098	0.0594168	0.0698752	0.0954206		97.5494	24.2676	46.3241		7.45455	4.80899	6.56792
0.649514	0.0594785	0.0694806	0.0956677		97.599	24.2764	46.4252		7.44773	4.79162	6.53888
0.649931	0.0596383	0.0697413	0.0949657		97.555	24.2522	46.397		7.43876	4.81386	6.6301
0.650348	0.059371	0.0698749	0.0958535		97.7459	24.3158	46.394		7.45074	4.79369	6.69588
0.650764	0.0596341	0.0695298	0.0956954		97.6996	24.3197	46.5449		7.4435	4.787	6.48609
0.651181	0.0593852	0.0696075	0.0952939		97.7167	24.3195	46.4833		7.37546	4.78559	6.49368
0.651598	0.0594542	0.0694591	0.0952483		97.804	24.3051	46.4945		7.38541	4.78209	6.55059
0.652014	0.0591084	0.0695719	0.095132		97.8606	24.3222	46.635		7.37974	4.79876	6.85914
0.652431	0.0593506	0.0694884	0.0954293		97.8772	24.3499	46.6152		7.38832	4.80123	6.72784
0.652848	0.0594454	0.0700609	0.0957996		97.883	24.3693	46.5983		7.39812	4.78932	6.41812
0.653264	0.059751	0.0695386	0.0960032		97.9368	24.4077	46.5665		7.38609	4.78569	6.60551
0.653681	0.0589487	0.0697731	0.0963172		97.9973	24.4214	46.6511		7.355	4.78854	6.5481
0.654098	0.059576	0.0696872	0.0962526		97.9712	24.4155	46.7142		7.33576	4.80147	6.66945
0.654514	0.0596979	0.0698104	0.096065		98.0492	24.4427	46.9163		7.30614	4.83063	6.75633
0.654931	0.0598321	0.0695701	0.0956769		98.0499	24.4738	46.9077		7.35631	4.82404	6.68858
0.655348	0.0594921	0.0696837	0.0959627		98.1321	24.4412	46.9076		7.33863	4.81891	6.68317
0.655764	0.0592356	0.0695344	0.0959209		98.1564	24.4515	46.8837		7.33147	4.82023	6.55868
0.656181	0.0593672	0.0697124	0.0954085		98.1508	24.4731	46.8265		7.32403	4.82838	6.55066
0.656598	0.0592017	0.069446	0.0957047		98.1847	24.4896	46.9228		7.32011	4.82154	6.6373
0.657014	0.0593004	0.069565	0.0958042		98.2191	24.5199	46.9108		7.33185	4.84021	6.6357
0.657431	0.0596947	0.0692579	0.0956306		98.2639	24.5401	47.0329		7.32674	4.80394	6.5612
0.657848	0.0595149	0.0695763	0.0957448		98.3575	24.5181	47.0416		7.31338	4.80081	6.48224
0.658264	0.0591209	0.0697807	0.0953246		98.3745	24.5434	47.0958		7.28419	4.79953	6.60526
0.658681	0.0600538	0.0692168	0.0956156		98.2972	24.584	47.1171		7.27076	4.78984	6.63331
0.659098	0.0597014	0.0693589	0.0954955		98.3043	24.5947	47.2192		7.26763	4.7935	6.58518
0.659514	0.0589953	0.0694464	0.0953396		98.3763	24.6119	47.1707		7.2685	4.82212	6.50135
0.659931	0.0596598	0.0696078	0.0960903		98.3902	24.6155	47.1641		7.24732	4.79954	6.70849
0.660348	0.0595878	0.0694168	0.0955304		98.3598	24.6509	47.1739		7.24224	4.77345	6.33323
0.660764	0.0595554	0.0694807	0.0954441		98.4285	24.6744	47.1321		7.24655	4.78836	6.40692
0.661181	0.0594681	0.0697268	0.0956189		98.4316	24.6926	47.2084		7.24469	4.80225	6.50378
0.661598	0.0592988	0.0696627	0.0955354		98.4633	24.6866	47.2935		7.21722	4.80927	6.71033
0.662014	0.0586252	0.0698296	0.0959353		98.5787	24.6976	47.4372		7.21904	4.78584	6.73914
0.662431	0.0591374	0.0697683	0.0952822		98.56	24.6932	47.3385		7.199	4.79196	6.71521
0.662848	0.059519	0.0692561	0.0952719		98.6839	24.7214	47.303		7.20427	4.79841	6.65034
0.663264	0.0591475	0.0699799	0.0950228		98.6639	24.7514	47.4397		7.19933	4.79223	6.50542
0.663681	0.0595666	0.0696937	0.0957671		98.7214	24.7674	47.3991		7.18775	4.78019	6.46437
0.664098	0.0590032	0.0696971	0.0953002		98.7195	24.7745	47.4468		7.21635	4.79818	6.38503
0.664514	0.0595786	0.0692312	0.0957376		98.7268	24.7512	47.4723		7.1864	4.80849	6.59862
0.664931	0.059728	0.0693248	0.0960422		98.7157	24.7754	47.5007		7.16654	4.79732	6.51752
0.665348	0.0596027	0.0698338	0.0957501		98.7261	24.81	47.5174		7.17642	4.80228	6.59344
0.665764	0.0597371	0.0694518	0.0959131		98.7743	24.8465	47.5914		7.18667	4.7804	6.4301
0.666181	0.0594967	0.0694962	0.0956072		98.8131	24.8298	47.7231		7.15912	4.781	6.50461
0.666598	0.0596909	0.0695045	0.0959157		98.8497	24.849	47.6082		7.12614	4.80003	6.63177
0.667014	0.0596068	0.0694884	0.0955867		98.9424	24.8986	47.6904		7.14355	4.8164	6.53933
0.667431	0.0594362	0.0695435	0.0957329		98.8893	24.892	47.7485		7.11718	4.79644	6.46739
0.667848	0.0593085	0.0699321	0.0953229		98.968	24.858	47.7148		7.13625	4.78285	6.49669
0.668264	0.0598436	0.0689912	0.0950799		98.9695	24.9081	47.6601		7.1225	4.79831	6.62642
0.668681	0.0596378	0.0697572	0.0952936		98.9918	24.9296	47.7101		7.08595	4.81368	6.62984
0.669098	0.0594489	0.0696203	0.0953751		99.0465	24.9197	47.7012		7.08927	4.83108	6.47736
0.669514	0.0593866	0.070101	0.095263		98.9851	24.963	47.7702		7.09497	4.81666	6.4898
0.669931	0.0593602	0.0698283	0.0952401		98.9631	24.9818	47.7874		7.10354	4.81644	6.5356
0.670348	0.0598401	0.0692722	0.0953147		99.0611	24.9878	47.9112		7.08308	4.82753	6.49957
0.670764	0.0596533	0.0696083	0.0949681		99.1107	25.0005	47.8395		7.06733	4.81982	6.57
0.671181	0.0593534	0.0696208	0.0952611		99.1292	25.0351	47.7701		7.08463	4.78386	6.7351
0.671598	0.0593431	0.0699814	0.0954104		99.2499	25.0126	47.9083		7.05941	4.77509	6.63798
0.672014	0.0597868	0.0696917	0.0949448		99.3027	25.0041	47.9715		7.03787	4.78667	6.43748
0.672431	0.0594695	0.0694202	0.0951322		99.3443	25.0294	47.9168		7.03967	4.78871	6.60209
0.672848	0.0600898	0.0698013	0.0954655		99.2942	25.016	47.9931		7.03809	4.78857	6.58712
0.673264	0.0593297	0.069839	0.0955288		99.3715	25.0526	47.9879		7.00467	4.7637	6.48429
0.673681	0.059209	0.0692866	0.0949684		99.3684	25.1042	48.0067		7.01181	4.78559	6.53022
0.674098	0.05943	0.0695221	0.0956122		99.4136	25.1115	48.0572		7.01191	4.77791	6.52133
0.674514	0.0594033	0.0694038	0.095346		99.4039	25.1152	48.0223		6.97025	4.76699	6.50273
0.674931	0.0593721	0.0699176	0.0954473		99.4438	25.1454	48.1277		6.93968	4.75796	6.41455
0.675348	0.058965	0.0694801	0.0956721		99.4928	25.1395	48.0918		6.97193	4.78154	6.23233
0.675764	0.0595093	0.0693162	0.095141		99.5663	25.1656	48.0838		6.96511	4.7835	6.59423
0.676181	0.0598235	0.0696723	0.0952114		99.5791	25.2297	48.0852		6.9511	4.81151	6.49114
0.676598	0.0595233	0.069558	0.0950341		99.5902	25.2024	48.0861		6.9281	4.81849	6.48232
0.677014	0.0595939	0.0697032	0.095036		99.5467	25.2048	48.2933		6.93326	4.79105	6.41603
0.677431	0.0590122	0.0698021	0.0953333		99.6193	25.2067	48.2942		6.95001	4.80491	6.48955
0.677848	0.0600411	0.0696728	0.0950974		99.6263	25.1955	48.2529		6.91229	4.8133	6.40283
0.678264	0.0601054	0.07007	0.0951868		99.6518	25.2218	48.2926		6.91069	4.81762	6.45748
0.678681	0.0601638	0.069695	0.0951819		99.607	25.2611	48.3726		6.89325	4.78898	6.58828
0.679098	0.0596457	0.0696851	0.095154		99.704	25.2694	48.3591		6.91515	4.81133	6.48926
0.679514	0.0599038	0.069407	0.0952783		99.6121	25.2882	48.2763		6.89038	4.81235	6.56923
0.679931	0.0600917	0.0694603	0.0943965		99.704	25.292	48.367		6.89164	4.82128	6.49671
0.680348	0.0596181	0.0693798	0.0952892		99.7413	25.3108	48.5001		6.89568	4.81214	6.507
0.680764	0.0601234	0.0695931	0.0950413		99.7131	25.3209	48.4119		6.88282	4.81107	6.43698
0.681181	0.0597157	0.0696765	0.0954382		99.7733	25.3488	48.4129		6.86993	4.76598	6.49049
0.681598	0.0600774	0.0695031	0.0951809		99.8299	25.3382	48.4839		6.88373	4.78151	6.48209
0.682014	0.0598775	0.0694154	0.0948261		99.9204	25.3793	48.5443		6.87123	4.80433	6.60164
0.682431	0.0599782	0.0698581	0.0948956		99.8675	25.3766	48.51		6.82196	4.81994	6.58198
0.682848	0.0594318	0.0698205	0.0953399		99.8939	25.396	48.6243		6.85198	4.84432	6.53313
0.683264	0.0597235	0.0696274	0.0953277		100.056	25.4524	48.6202		6.87555	4.83537	6.47212
0.683681	0.0595764	0.0701799	0.0952616		99.962	25.4312	48.6619		6.8623	4.83476	6.37412
0.684098	0.0598789	0.0696376	0.0956012		99.9567	25.414	48.7668		6.84058	4.81707	6.46377
0.684514	0.0599552	0.0699448	0.0955585		99.9754	25.4221	48.7828		6.82639	4.82352	6.64792
0.684931	0.0601542	0.0698473	0.0949063		99.9957	25.4435	48.7727		6.84218	4.79304	6.60181
0.685348	0.0598008	0.0696742	0.0952259		100.061	25.4505	48.674		6.8119	4.77511	6.72765
0.685764	0.0596705	0.0703671	0.0951074		100.016	25.4537	48.7795		6.80908	4.80082	6.41983
0.686181	0.0594728	0.0698239	0.0952263		99.9881	25.4593	48.848		6.80513	4.80929	6.61806
0.686598	0.0598862	0.0696354	0.0951119		100.012	25.4844	48.8566		6.80107	4.79286	6.51077
0.687014	0.0603398	0.0699714	0.0948216		100.08	25.5219	48.8591		6.81671	4.79131	6.58633
0.687431	0.060445	0.0701063	0.0949856		100.081	25.5581	48.8615		6.84066	4.80308	6.5861
0.687848	0.0594995	0.0694108	0.0957703		100.093	25.5725	48.9891		6.8037	4.82691	6.29172
0.688264	0.0596957	0.0699907	0.0951972		100.099	25.5944	49.0221		6.78789	4.82803	6.50621
0.688681	0.0600286	0.0695438	0.0957004		100.121	25.5941	49.0059		6.78504	4.80643	6.74491
0.689098	0.0602635	0.0702372	0.095233		100.173	25.5925	49.0788		6.78155	4.77411	6.71967
0.689514	0.0604718	0.0697398	0.0949076		100.192	25.581	48.9265		6.77194	4.81816	6.63718
0.689931	0.0605167	0.0695746	0.0956469		100.174	25.6081	48.8552		6.7787	4.82835	6.3946
0.690348	0.0600861	0.0697372	0.0954585		100.127	25.5884	49.0267		6.76919	4.83936	6.34531
0.690764	0.0601857	0.0695835	0.095661		100.173	25.5807	49.0833		6.74045	4.82313	6.45758
0.691181	0.059953	0.0699493	0.0951759		100.25	25.6137	49.1986		6.75745	4.83	6.53663
0.691598	0.0601849	0.0694416	0.0952545		100.389	25.6305	49.2341		6.76859	4.79619	6.7051
0.692014	0.059932	0.0697021	0.0955602		100.343	25.6654	49.1923		6.7475	4.77879	6.50538
0.692431	0.0602997	0.069884	0.0954187		100.304	25.6526	49.3595		6.75005	4.79022	6.41254
0.692848	0.0600854	0.0698974	0.095539		100.341	25.6965	49.4396		6.74016	4.81476	6.46447
0.693264	0.05976	0.0700229	0.0953993		100.337	25.6931	49.3415		6.74547	4.8228	6.43398
0.693681	0.0599931	0.0693465	0.0951678		100.385	25.7043	49.3933		6.71729	4.83372	6.4751
0.694098	0.0602207	0.069506	0.0952769		100.421	25.6947	49.3781		6.74197	4.82068	6.29633
0.694514	0.0600614	0.0697184	0.094973		100.407	25.737	49.4362		6.74279	4.8019	6.47905
0.694931	0.0595766	0.0698459	0.0955888		100.369	25.7568	49.4386		6.72244	4.7735	6.41702
0.695348	0.0603658	0.0694483	0.0952294		100.458	25.7894	49.3926		6.71177	4.80301	6.40611
0.695764	0.059829	0.0698717	0.0950755		100.535	25.8036	49.5343		6.70503	4.79921	6.45836
0.696181	0.0597799	0.0695466	0.0951168		100.493	25.8019	49.6168		6.70914	4.7828	6.41608
0.696598	0.0598578	0.0695307	0.0954102		100.513	25.7955	49.7084		6.697	4.80011	6.38693
0.697014	0.0597062	0.0698075	0.0952123		100.51	25.8556	49.7144		6.70121	4.8277	6.45374
0.697431	0.059429	0.0692923	0.0952341		100.525	25.869	49.704		6.68105	4.79077	6.44186
0.697848	0.0597704	0.0695778	0.0953493		100.499	25.8558	49.6242		6.6737	4.77979	6.2961
0.698264	0.060422	0.0695915	0.0949206		100.47	25.8271	49.6911		6.6643	4.79251	6.31824
0.698681	0.0597711	0.0693875	0.0950971		100.554	25.9056	49.7275		6.67818	4.79499	6.27772
0.699098	0.0602192	0.0695543	0.0952909		100.568	25.9388	49.7348		6.64791	4.79112	6.48341
0.699514	0.0594067	0.0695657	0.0958688		100.644	25.8938	49.769		6.66194	4.77353	6.53352
0.699931	0.0600846	0.069296	0.0956719		100.632	25.8796	49.8016		6.66968	4.78667	6.65438
0.700348	0.0599218	0.0697926	0.0954163		100.665	25.9182	49.8711		6.64765	4.81731	6.6646
0.700764	0.0597963	0.0695652	0.0956829		100.65	25.9189	49.9166		6.6617	4.81217	6.75259
0.701181	0.0600845	0.0695772	0.0952516		100.707	25.9402	49.9173		6.68045	4.80959	6.47915
0.701598	0.0599368	0.0694772	0.095653		100.811	25.9677	49.9729		6.65061	4.80876	6.38817
0.702014	0.0601241	0.0694093	0.0952264		100.72	25.97	50.0633		6.59762	4.80211	6.58628
0.702431	0.0595486	0.0695449	0.0957567		100.733	26.0036	49.9149		6.60891	4.83108	6.42611
0.702848	0.0598012	0.0693621	0.0953637		100.768	26.0004	50.0814		6.60978	4.83027	6.54644
0.703264	0.0597984	0.0696945	0.095601		100.792	25.9937	50.0776		6.61187	4.83149	6.59535
0.703681	0.059663	0.0693222	0.0954335		100.787	26.0265	50.099		6.58837	4.82672	6.60415
0.704098	0.0595797	0.0693831	0.095174		100.791	26.0514	50.2141		6.60527	4.81307	6.44839
0.704514	0.05988	0.0691413	0.0956969		100.816	26.0475	50.2276		6.5977	4.79963	6.31275
0.704931	0.0602415	0.0696983	0.0948996		100.784	26.0356	50.3211		6.58405	4.79761	6.52295
0.705348	0.0600145	0.0700306	0.0954316		100.839	26.0787	50.1882		6.55784	4.79967	6.33955
0.705764	0.0600414	0.069216	0.0956338		100.853	26.0497	50.096		6.53039	4.82485	6.53716
0.706181	0.0596724	0.0695125	0.0951652		100.87	26.0564	50.368		6.5377	4.82376	6.66459
0.706598	0.0600841	0.0692068	0.094877		100.925	26.0487	50.4595		6.55663	4.80143	6.66936
0.707014	0.060174	0.0694844	0.0955182		100.887	26.0557	50.3077		6.53348	4.79358	6.45583
0.707431	0.0600576	0.0695235	0.09559		100.831	26.1026	50.4717		6.54575	4.78516	6.56964
0.707848	0.0602513	0.0692468	0.095522		100.859	26.121	50.4013		6.54059	4.81241	6.56656
0.708264	0.0604961	0.0693747	0.0957726		100.893	26.1005	50.5004		6.55446	4.82164	6.33198
0.708681	0.0597501	0.0692543	0.0953719		100.913	26.1242	50.4586		6.53118	4.79955	6.52898
0.709098	0.0595917	0.0695406	0.0950362		100.89	26.1082	50.4105		6.50108	4.78658	6.56998
0.709514	0.0600983	0.0693414	0.0956517		100.91	26.1414	50.3504		6.51959	4.80768	6.32154
0.709931	0.0598831	0.0694945	0.0955556		100.914	26.1639	50.4939		6.5138	4.78308	6.53311
0.710348	0.0596476	0.0694363	0.0958422		100.949	26.1705	50.6066		6.51489	4.80971	6.51517
0.710764	0.0599018	0.0694636	0.0948718		100.991	26.1808	50.645		6.51316	4.83166	6.45426
0.711181	0.0591668	0.0690187	0.0945976		100.954	26.2152	50.6545		6.5121	4.84496	6.56821
0.711598	0.0597484	0.0695531	0.0951976		100.886	26.2303	50.6004		6.47714	4.81072	6.48459
0.712014	0.0600444	0.068924	0.095316		100.908	26.2616	50.7124		6.48636	4.82126	6.37594
0.712431	0.0603622	0.0695077	0.0951027		100.958	26.2565	50.6878		6.5022	4.81427	6.51279
0.712848	0.0600413	0.0689574	0.0954675		101.027	26.2689	50.6951		6.44706	4.81757	6.41517
0.713264	0.0596653	0.069096	0.0955639		100.975	26.2788	50.6792		6.49289	4.80867	6.47698
0.713681	0.0598053	0.0692486	0.0955349		100.984	26.2533	50.8778		6.50403	4.78557	6.44973
0.714098	0.0598322	0.0690179	0.0947658		101.036	26.2835	50.8217		6.47847	4.80859	6.39338
0.714514	0.0595308	0.0690061	0.0950863		101.047	26.304	50.8195		6.4626	4.83519	6.36513
0.714931	0.059496	0.0693049	0.0954273		101.082	26.3473	50.8498		6.46963	4.80954	6.40333
0.715348	0.0600309	0.0694117	0.0953197		101.12	26.3506	50.9577		6.46377	4.79109	6.4928
0.715764	0.0594399	0.0689798	0.0950853		101.186	26.3554	51.0283		6.45145	4.81047	6.36503
0.716181	0.060313	0.069283	0.0952369		101.17	26.3811	51.0619		6.45398	4.82399	6.47808
0.716598	0.0596	0.0688195	0.0950885		101.144	26.4319	51.0006		6.45672	4.8352	6.36396
0.717014	0.060119	0.0692749	0.0950265		101.076	26.4304	51.0699		6.42984	4.83078	6.54211
0.717431	0.0600221	0.0693605	0.095369		101.106	26.3848	50.9996		6.44243	4.84979	6.56302
0.717848	0.0597362	0.0691598	0.0952055		101.073	26.4104	51.0196		6.43605	4.79822	6.55023
0.718264	0.05975	0.069434	0.0949679		101.107	26.4455	51.0399		6.45413	4.77554	6.56593
0.718681	0.0596609	0.068973	0.09499		101.124	26.4349	51.0505		6.44736	4.81931	6.5566
0.719098	0.0598896	0.0697227	0.0949555		101.129	26.4601	51.1553		6.45104	4.85183	6.32165
0.719514	0.0600402	0.0690215	0.0945426		101.121	26.4299	51.2126		6.4232	4.82205	6.45803
0.719931	0.0597269	0.0690966	0.0953451		101.087	26.4371	51.2718		6.41576	4.82375	6.44523
0.720348	0.0598449	0.0695028	0.0947517		101.203	26.4692	51.2609		6.419	4.83499	6.4544
0.720764	0.0603361	0.0690126	0.0952115		101.22	26.5052	51.424		6.4104	4.82803	6.58036
0.721181	0.0595967	0.0694756	0.0948977		101.145	26.5327	51.4897		6.41777	4.83797	6.48775
0.721598	0.0602552	0.0688004	0.094877		101.202	26.5681	51.4932		6.41617	4.86019	6.52533
0.722014	0.0594816	0.0691662	0.0948279		101.156	26.5403	51.5685		6.43376	4.83721	6.608
0.722431	0.0598961	0.0695074	0.0946549		101.209	26.557	51.4972		6.3948	4.81431	6.70608
0.722848	0.0594169	0.0693377	0.0951287		101.238	26.5671	51.6018		6.4123	4.81559	6.57087
0.723264	0.0600767	0.0693294	0.0949465		101.172	26.573	51.5302		6.40474	4.82332	6.45746
0.723681	0.0598034	0.0693087	0.0950311		101.166	26.5653	51.5677		6.4027	4.80914	6.44271
0.724098	0.0598794	0.0689162	0.0945962		101.203	26.5907	51.7512		6.39961	4.81884	6.44215
0.724514	0.0599602	0.0690006	0.0949535		101.29	26.5924	51.7038		6.39305	4.82244	6.47181
0.724931	0.0594606	0.0694079	0.095329		101.186	26.6527	51.7892		6.37491	4.80125	6.41057
0.725348	0.060168	0.0698197	0.0948727		101.19	26.6677	51.8134		6.37155	4.81372	6.47766
0.725764	0.0594856	0.0691725	0.0951587		101.21	26.6458	51.7683		6.4	4.81836	6.56272
0.726181	0.0599812	0.0692898	0.0952907		101.198	26.6376	51.8696		6.37161	4.80658	6.49619
0.726598	0.0596901	0.0692578	0.094703		101.247	26.6238	51.764		6.35344	4.80864	6.57529
0.727014	0.0599693	0.0693	0.0947434		101.193	26.6398	51.809		6.37272	4.81603	6.43764
0.727431	0.060085	0.0691919	0.0945613		101.129	26.6568	51.8841		6.36676	4.82746	6.39086
0.727848	0.0601204	0.0694429	0.0951033		101.21	26.724	51.8801		6.37525	4.83085	6.40522
0.728264	0.060444	0.0694033	0.094988		101.204	26.7123	51.9757		6.34263	4.79264	6.38184
0.728681	0.059507	0.0697314	0.0955595		101.187	26.6929	52.0075		6.35144	4.81191	6.46032
0.729098	0.0601749	0.06927	0.0950797		101.187	26.7156	52.0665		6.3563	4.80787	6.34503
0.729514	0.0602674	0.0693916	0.0948117		101.158	26.7175	52.0503		6.33245	4.76949	6.42935
0.729931	0.0601948	0.0694158	0.0954752		101.189	26.7641	52.0754		6.32222	4.81547	6.3172
0.730348	0.0598611	0.0693401	0.0946185		101.161	26.8213	51.9818		6.33948	4.84318	6.27998
0.730764	0.0604984	0.0694492	0.0949688		101.166	26.797	52.0713		6.3134	4.82017	6.16376
0.731181	0.0597943	0.0696564	0.0950376		101.115	26.7883	51.9974		6.3204	4.83038	6.32918
0.731598	0.0599484	0.069347	0.0947615		101.213	26.7917	52.1288		6.34424	4.83089	6.35139
0.732014	0.0597088	0.0693829	0.0952696		101.226	26.8181	52.21		6.30187	4.81636	6.22682
0.732431	0.0593224	0.0694052	0.0951028		101.184	26.8133	52.1697		6.29843	4.83871	6.48968
0.732848	0.0597627	0.069582	0.0948316		101.167	26.7914	52.3325		6.31056	4.8289	6.39126
0.733264	0.0600449	0.0694602	0.0950586		101.181	26.8612	52.3538		6.31898	4.81083	6.58705
0.733681	0.0605728	0.069898	0.0946562		101.201	26.8453	52.3176		6.29923	4.85106	6.52197
0.734098	0.0605281	0.0694376	0.094931		101.179	26.8086	52.38		6.3064	4.85572	6.52352
0.734514	0.0602274	0.0691662	0.0949568		101.179	26.8449	52.4238		6.27967	4.85852	6.52023
0.734931	0.060774	0.06947	0.094917		101.085	26.9016	52.4188		6.27047	4.83495	6.50581
0.735348	0.0601491	0.0693173	0.0948994		101.047	26.8967	52.4487		6.27827	4.83512	6.31419
0.735764	0.0599746	0.0695053	0.0947879		101.113	26.8385	52.3957		6.2762	4.83364	6.44472
0.736181	0.060293	0.0696654	0.0950549		101.171	26.8912	52.4226		6.28221	4.81549	6.51988
0.736598	0.0603817	0.0697039	0.0950695		101.177	26.8826	52.5154		6.25091	4.82332	6.37504
0.737014	0.0600023	0.0694988	0.0954527		101.18	26.8627	52.5383		6.24185	4.84995	6.3825
0.737431	0.0602521	0.0698249	0.0950458		101.158	26.8575	52.5401		6.2762	4.843	6.49525
0.737848	0.0601686	0.0702339	0.0948549		101.116	26.8722	52.4429		6.24301	4.84331	6.45872
0.738264	0.0604589	0.0694219	0.0950573		101.088	26.9272	52.6514		6.24412	4.83956	6.37158
0.738681	0.0603825	0.069789	0.094723		101.112	26.9325	52.6926		6.26219	4.83164	6.28799
0.739098	0.060465	0.0695986	0.0950789		101.11	26.9367	52.7675		6.2528	4.81507	6.40609
0.739514	0.0601506	0.0697965	0.0954288		101.102	26.9945	52.7533		6.2564	4.81504	6.42118
0.739931	0.0609685	0.069505	0.0947554		101.068	27.0006	52.8543		6.23079	4.83193	6.37671
0.740348	0.060814	0.0699061	0.0949428		101.045	27.029	52.7893		6.23765	4.82682	6.34286
0.740764	0.0603717	0.0697368	0.094578		101.105	27.057	52.7989		6.22066	4.82952	6.50551
0.741181	0.0608419	0.0696493	0.0951042		101.091	27.069	52.8304		6.22843	4.83444	6.41438
0.741598	0.06033	0.0696993	0.0949783		101.028	27.0555	52.8899		6.22686	4.85414	6.43941
0.742014	0.0596005	0.0691962	0.0952546		101.046	27.0526	52.8782		6.23076	4.8242	6.39404
0.742431	0.060305	0.0697136	0.0951142		101.165	27.0812	52.9726		6.21187	4.82187	6.42444
0.742848	0.0606583	0.0693326	0.0952		101.221	27.1027	52.9093		6.21047	4.83396	6.67829
0.743264	0.0601696	0.0695809	0.0951546		101.179	27.0843	52.8952		6.20511	4.82234	6.48169
0.743681	0.0599445	0.0696274	0.0946831		101.11	27.1274	53.0052		6.15379	4.83841	6.32389
0.744098	0.0602397	0.0691924	0.0950012		101.068	27.1334	53.1199		6.17259	4.82375	6.35035
0.744514	0.0603057	0.0696038	0.0949465		101.051	27.1413	53.1301		6.20207	4.8353	6.36772
0.744931	0.0598144	0.069568	0.0950796		100.987	27.1298	53.0707		6.18078	4.82492	6.29653
0.745348	0.0602788	0.069298	0.0946642		100.984	27.1846	53.2079		6.16583	4.83696	6.4111
0.745764	0.0603556	0.0698094	0.09458		100.995	27.1792	53.2549		6.18164	4.86865	6.47807
0.746181	0.0603155	0.0693391	0.0949593		100.974	27.1647	53.2256		6.20122	4.85071	6.16867
0.746598	0.0597241	0.0693281	0.0948865		100.96	27.1411	53.2096		6.15722	4.83089	6.38281
0.747014	0.0603466	0.0692463	0.0949778		100.856	27.1746	53.2404		6.17924	4.80319	6.55326
0.747431	0.0600864	0.0695496	0.0945772		100.923	27.2006	53.3074		6.16353	4.82653	6.43835
0.747848	0.0605469	0.06943	0.0946717		100.944	27.2179	53.2435		6.14962	4.82945	6.54741
0.748264	0.0603361	0.0692132	0.0945888		100.977	27.1909	53.3783		6.14435	4.81836	6.48233
0.748681	0.0598172	0.0696088	0.0947876		100.9	27.2141	53.4681		6.17029	4.83115	6.47764
0.749098	0.0598486	0.0693644	0.0948418		100.887	27.2622	53.3414		6.17446	4.84483	6.29302
0.749514	0.0600348	0.069165	0.0948309		100.878	27.2623	53.3515		6.17461	4.85306	6.35195
0.749931	0.0603062	0.0697105	0.0961304		100.909	27.2637	53.4241		6.13703	4.83619	6.21099
0.750348	0.0601939	0.0693678	0.0955247		100.875	27.2309	53.5523		6.13909	4.85433	6.37456
0.750764	0.0593301	0.0692814	0.095398		100.94	27.2727	53.4367		6.13719	4.8206	6.48031
0.751181	0.0595431	0.0689983	0.0944079		100.976	27.3121	53.658		6.14188	4.81506	6.33741
0.751598	0.0604905	0.0692831	0.0947793		100.87	27.3178	53.6733		6.13246	4.83323	6.42058
0.752014	0.0597572	0.0695264	0.0949271		100.842	27.3402	53.6699		6.10652	4.81691	6.40075
0.752431	0.0597596	0.0690304	0.0946657		100.855	27.305	53.7058		6.12306	4.84425	6.50257
0.752848	0.0596454	0.0691267	0.0951981		100.811	27.3121	53.6964		6.12956	4.8442	6.30612
0.753264	0.0598891	0.0689298	0.0953468		100.907	27.3188	53.8112		6.12795	4.86695	6.39572
0.753681	0.0601432	0.0693056	0.0949692		100.812	27.3571	53.7709		6.11498	4.83212	6.35722
0.754098	0.059715	0.0688065	0.0945412		100.766	27.3401	53.8849		6.11392	4.84065	6.24136
0.754514	0.059953	0.0690272	0.0945665		100.773	27.361	53.8741		6.10658	4.87211	6.33432
0.754931	0.0605271	0.0690175	0.094353		100.732	27.4078	53.899		6.11178	4.84542	6.41953
0.755348	0.0600946	0.0691426	0.0944496		100.642	27.4387	53.863		6.10293	4.83729	6.17674
0.755764	0.0598245	0.0691312	0.0942007		100.671	27.4561	53.8491		6.10381	4.86331	6.3396
0.756181	0.0596898	0.0690337	0.0945325		100.702	27.4284	53.9792		6.08233	4.82725	6.31932
0.756598	0.0592256	0.0691786	0.0945153		100.778	27.4527	53.9576		6.09347	4.83153	6.30565
0.757014	0.0598852	0.0689521	0.0940609		100.784	27.4567	54.0209		6.0833	4.85173	6.31243
0.757431	0.0602203	0.0691986	0.0944755		100.781	27.4775	53.9635		6.10701	4.85308	6.51483
0.757848	0.0604085	0.0692973	0.0945564		100.731	27.5071	53.9902		6.07683	4.84952	6.48882
0.758264	0.0603857	0.0691215	0.0939632		100.612	27.5386	54.048		6.08576	4.86059	6.63137
0.758681	0.059884	0.0688766	0.0942437		100.711	27.5108	54.1306		6.10575	4.85331	6.5592
0.759098	0.0596241	0.0689707	0.0943951		100.653	27.5107	54.2671		6.09709	4.87225	6.44377
0.759514	0.060088	0.0690897	0.0943483		100.609	27.5303	54.1507		6.08651	4.85609	6.35511
0.759931	0.0599557	0.0686342	0.0943552		100.602	27.5326	54.1869		6.0921	4.8581	6.38326
0.760348	0.0596832	0.068997	0.0947976		100.584	27.5613	54.2912		6.08251	4.85052	6.44251
0.760764	0.0597989	0.0687026	0.0936781		100.572	27.5534	54.3081		6.05673	4.84149	6.40033
0.761181	0.0596383	0.0688489	0.0947673		100.52	27.5764	54.3913		6.06778	4.86789	6.44055
0.761598	0.0599753	0.0690723	0.094511		100.409	27.5956	54.3749		6.0592	4.86085	6.35836
0.762014	0.0601232	0.0692304	0.0944119		100.459	27.6032	54.2639		6.05363	4.8506	6.35043
0.762431	0.0593969	0.0688017	0.0940561		100.519	27.6132	54.2667		6.05696	4.83037	6.38332
0.762848	0.0597664	0.0694727	0.0943207		100.43	27.6241	54.3748		6.05175	4.82073	6.36282
0.763264	0.0602593	0.0689244	0.0942713		100.367	27.6466	54.3779		6.03117	4.83561	6.32509
0.763681	0.0600463	0.0690812	0.0942916		100.434	27.6875	54.4492		6.03875	4.85533	6.4149
0.764098	0.0598014	0.0688037	0.093943		100.492	27.6916	54.512		6.0496	4.83591	6.46322
0.764514	0.0594528	0.0688969	0.09442		100.403	27.6809	54.485		6.03508	4.84866	6.46175
0.764931	0.0600355	0.0691554	0.0943256		100.411	27.6656	54.4952		6.05389	4.87408	6.46711
0.765348	0.0601584	0.0692183	0.0942451		100.351	27.6836	54.6561		6.05398	4.89121	6.30934
0.765764	0.0593449	0.0690329	0.0937724		100.439	27.6913	54.543		6.04967	4.86943	6.30913
0.766181	0.0595882	0.0691992	0.0942435		100.365	27.7335	54.7356		6.03357	4.86038	6.46839
0.766598	0.060194	0.0692964	0.0947168		100.262	27.7103	54.7235		6.01189	4.86275	6.51259
0.767014	0.0598053	0.0689143	0.0945593		100.221	27.7358	54.7237		6.02577	4.87822	6.35883
0.767431	0.0599195	0.0688246	0.0944611		100.288	27.7389	54.6387		6.01194	4.84146	6.31119
0.767848	0.0596923	0.0692161	0.0944132		100.246	27.7658	54.8038		6.02231	4.85875	6.37732
0.768265	0.0600591	0.0688866	0.0950397		100.184	27.7702	54.8089		6.0313	4.88193	6.39031
0.768681	0.0596305	0.0689247	0.0945427		100.169	27.8266	54.9081		6.03338	4.8686	6.33172
0.769098	0.0597314	0.0691456	0.0941519		100.149	27.8482	54.9507		6.02211	4.84512	6.43547
0.769515	0.0597294	0.0689731	0.0941622		100.138	27.7968	54.9208		6.03553	4.85159	6.45488
0.769931	0.0597992	0.0689863	0.0945607		100.076	27.8424	54.9372		6.01878	4.85232	6.37338
0.770348	0.059685	0.0689787	0.0942359		100.044	27.8243	54.8512		5.99963	4.8539	6.31012
0.770765	0.0596519	0.0686727	0.0945929		100.006	27.7976	55.2125		5.99806	4.85876	6.50947
0.771181	0.0599502	0.0688004	0.0941959		100.055	27.8277	55.1467		6.00917	4.85523	6.30745
0.771598	0.05962	0.0688869	0.0944681		100.131	27.7901	55.1078		6.02154	4.84575	6.5198
0.772015	0.0597374	0.069023	0.0939144		100.024	27.8418	55.0214		6.00075	4.86805	6.31529
0.772431	0.0598719	0.0689133	0.0941862		99.9975	27.8699	54.9797		6.00478	4.8798	6.31037
0.772848	0.0596478	0.0689112	0.0952149		100.046	27.917	54.886		6.01024	4.88276	6.44877
0.773265	0.0599063	0.0687354	0.0940438		99.9375	27.8933	54.9134		6.01627	4.86854	6.49029
0.773681	0.0598922	0.0686746	0.094284		99.9022	27.8702	55.0328		5.97522	4.85868	6.52113
0.774098	0.0595796	0.0688862	0.0946322		99.9188	27.8796	55.0469		5.98596	4.86173	6.49709
0.774515	0.0601666	0.0690843	0.0940111		99.8597	27.9391	55.1242		5.99915	4.83344	6.36551
0.774931	0.059902	0.0689505	0.0944885		99.888	27.9835	55.1206		5.97496	4.84304	6.43772
0.775348	0.059864	0.0683967	0.0944411		99.871	27.9556	55.1725		5.98443	4.85709	6.35486
0.775765	0.0598979	0.0687315	0.0946639		99.8223	27.9379	55.2295		5.9782	4.87366	6.31375
0.776181	0.0599222	0.0687501	0.0942822		99.7827	27.9411	55.2501		5.98047	4.85912	6.52949
0.776598	0.0598297	0.0689794	0.0944975		99.6957	28.0138	55.2869		5.97652	4.88826	6.41787
0.777015	0.0604609	0.0688877	0.0938435		99.7384	28.013	55.2445		5.9879	4.87514	6.36808
0.777431	0.0603839	0.0687752	0.0942535		99.6485	27.9743	55.1888		5.98017	4.86353	6.38819
0.777848	0.0596249	0.0689028	0.0940814		99.5944	28.0305	55.2574		5.96976	4.87212	6.39532
0.778265	0.0599358	0.0686466	0.0944391		99.6519	28.0936	55.4481		5.97677	4.86095	6.55428
0.778681	0.0596757	0.0687236	0.0942127		99.6706	28.0441	55.341		5.98558	4.86471	6.56507
0.779098	0.0596081	0.0690361	0.0940453		99.6909	28.0161	55.5629		5.94077	4.86094	6.54109
0.779515	0.0600492	0.0684649	0.0941717		99.6914	28.0363	55.6503		5.95953	4.83159	6.32085
0.779931	0.0598721	0.0691264	0.0941559		99.5852	28.0402	55.4906		5.95041	4.88747	6.47855
0.780348	0.0605592	0.0686248	0.09428		99.6041	28.0483	55.4389		5.939	4.86329	6.45864
0.780765	0.0600578	0.0685562	0.0944011		99.5607	28.0687	55.4513		5.95399	4.90437	6.51027
0.781181	0.0596439	0.0691224	0.0940472		99.5106	28.1149	55.5564		5.97355	4.89501	6.50313
0.781598	0.0598895	0.0691152	0.0934003		99.569	28.1413	55.597		5.94797	4.86264	6.40759
0.782015	0.0601766	0.0691356	0.0941301		99.5297	28.1813	55.5635		5.96541	4.88598	6.30109
0.782431	0.0604522	0.0686536	0.0938523		99.4873	28.1737	55.6607		5.94884	4.88855	6.35684
0.782848	0.0601314	0.0688474	0.093508		99.3892	28.1404	55.7378		5.95117	4.86146	6.28625
0.783265	0.0603453	0.0683085	0.0935278		99.354	28.1305	55.7919		5.93592	4.88533	6.28993
0.783681	0.0599522	0.0690662	0.093385		99.3243	28.136	55.7298		5.92533	4.85615	6.28825
0.784098	0.0599717	0.0689002	0.0938021		99.2737	28.1813	55.8409		5.92852	4.86927	6.29779
0.784515	0.0599467	0.0685357	0.0931088		99.2717	28.1508	55.8368		5.89743	4.84821	6.2197
0.784931	0.0594257	0.0686668	0.0937659		99.2	28.2033	55.9601		5.92216	4.85849	6.48477
0.785348	0.0596832	0.0686753	0.0938858		99.2265	28.2588	55.9986		5.94157	4.87642	6.64643
0.785765	0.0598931	0.0689545	0.0934584		99.2412	28.2628	55.8615		5.92531	4.872	6.40549
0.786181	0.059441	0.0685119	0.0932047		99.2034	28.2472	56.0065		5.92364	4.88433	6.50945
0.786598	0.0597735	0.0687225	0.0934198		99.1088	28.2639	55.9802		5.91084	4.88375	6.43337
0.787015	0.0593644	0.0682817	0.0940161		99.094	28.1996	55.9564		5.92432	4.87621	6.48061
0.787431	0.0596899	0.0685454	0.0928382		98.9516	28.2398	56.0314		5.90288	4.87833	6.27653
0.787848	0.0600724	0.0686366	0.0934037		98.9734	28.2517	55.9863		5.92198	4.89477	6.29843
0.788265	0.0597743	0.0684585	0.0933922		98.9957	28.2896	56.0274		5.94429	4.89966	6.38399
0.788681	0.05943	0.0682488	0.0931159		98.8646	28.2801	56.1478		5.93424	4.87203	6.41392
0.789098	0.0598193	0.0686349	0.0932146		98.9059	28.3118	56.3836		5.90286	4.87762	6.41477
0.789515	0.059687	0.0681789	0.0929127		98.8084	28.3452	56.2897		5.90665	4.88353	6.3208
0.789931	0.0600867	0.0686239	0.0930505		98.808	28.3476	56.2549		5.90239	4.89879	6.32224
0.790348	0.0597946	0.0683532	0.0929471		98.7616	28.3735	56.259		5.88314	4.88264	6.3383
0.790765	0.0596105	0.0687203	0.0931227		98.7767	28.3676	56.238		5.90821	4.90832	6.23625
0.791181	0.0590151	0.0681945	0.0924967		98.6886	28.3909	56.3567		5.89164	4.90641	6.52226
0.791598	0.0598567	0.0684622	0.0924457		98.5909	28.4255	56.4076		5.90767	4.90672	6.51697
0.792015	0.0596758	0.068295	0.0926548		98.7203	28.4271	56.3928		5.89775	4.93241	6.51179
0.792431	0.0595104	0.068659	0.0927013		98.6098	28.4272	56.3699		5.89543	4.92452	6.26164
0.792848	0.0595821	0.0682448	0.0924189		98.634	28.4165	56.542		5.88229	4.88795	6.38866
0.793265	0.0596963	0.0684357	0.0926083		98.5136	28.4246	56.5332		5.86461	4.91273	6.34244
0.793681	0.05924	0.0685092	0.0926977		98.5293	28.4743	56.5146		5.88697	4.90755	6.30184
0.794098	0.0594723	0.0678639	0.0927614		98.4126	28.4748	56.6651		5.87866	4.91775	6.39667
0.794515	0.0600356	0.0685648	0.0924535		98.4017	28.4527	56.5901		5.8667	4.9115	6.37205
0.794931	0.0595431	0.0682772	0.0927733		98.4766	28.4731	56.5424		5.88414	4.90966	6.40793
0.795348	0.0602159	0.0686222	0.0925746		98.4585	28.484	56.5842		5.8644	4.90014	6.46323
0.795765	0.0599427	0.0684358	0.0927055		98.3355	28.4895	56.6521		5.85569	4.87235	6.59815
0.796181	0.0586651	0.0684579	0.0930001		98.3883	28.4783	56.5941		5.84249	4.88464	6.38522
0.796598	0.0598296	0.0683899	0.092026		98.382	28.5034	56.7801		5.86371	4.90758	6.23256
0.797015	0.0598615	0.0685202	0.0927935		98.3338	28.5348	56.775		5.84043	4.91278	6.32737
0.797431	0.059327	0.0683719	0.0926491		98.2243	28.5837	56.8129		5.8253	4.85526	6.38979
0.797848	0.0593029	0.0683113	0.0920961		98.1905	28.5335	56.658		5.84746	4.89152	6.35134
0.798265	0.0589248	0.068198	0.0923039		98.1687	28.5377	56.8269		5.85251	4.89042	6.27673
0.798681	0.0593216	0.0684467	0.0917864		98.1299	28.6185	56.7307		5.83488	4.89337	6.47668
0.799098	0.0598956	0.0687546	0.0927065		98.2258	28.646	56.798		5.84759	4.91862	6.15053
0.799515	0.0592611	0.0682235	0.0917826		98.1283	28.6423	56.9114		5.85141	4.89173	6.19218
0.799931	0.0593201	0.0681914	0.0923685		98.0086	28.6197	56.9311		5.83506	4.90418	6.23343
0.800348	0.0593979	0.0680957	0.0923219		97.977	28.6165	56.8872		5.84315	4.92643	6.31075
0.800765	0.0589432	0.0681797	0.0927345		97.9893	28.6645	56.9313		5.84584	4.92078	6.18084
0.801181	0.0595124	0.0685818	0.0919578		97.9314	28.6633	56.9228		5.81368	4.93362	6.35139
0.801598	0.0597044	0.0680435	0.0920232		97.9232	28.6326	56.9536		5.81434	4.9427	6.34204
0.802015	0.0589556	0.0681803	0.0922533		97.9519	28.6467	57.0311		5.83062	4.88234	6.36013
0.802431	0.0597716	0.0677089	0.0923366		97.8616	28.6837	57.1478		5.81161	4.89497	6.20117
0.802848	0.0592431	0.0682269	0.0924939		97.8267	28.7395	57.1253		5.79957	4.87642	6.44031
0.803265	0.0591669	0.0682206	0.0919305		97.7503	28.7038	57.1267		5.81434	4.88716	6.46177
0.803681	0.0595824	0.0678014	0.0918197		97.7211	28.6994	57.1997		5.80883	4.90787	6.36376
0.804098	0.0591211	0.0679258	0.0917784		97.685	28.7407	57.1728		5.81526	4.91102	6.28871
0.804515	0.0592258	0.0679825	0.091805		97.6315	28.7019	57.2809		5.80406	4.92235	6.39746
0.804931	0.0592002	0.0679746	0.0921525		97.6203	28.7433	57.1286		5.81016	4.90423	6.31707
0.805348	0.0594063	0.0680028	0.0919045		97.5415	28.7684	57.2206		5.80797	4.89898	6.33608
0.805765	0.0592415	0.0676372	0.0919737		97.5641	28.7559	57.2032		5.81244	4.90076	6.35968
0.806181	0.0593794	0.0684216	0.0918935		97.5679	28.7953	57.2319		5.7944	4.88543	6.3594
0.806598	0.0595115	0.0680308	0.0925545		97.5563	28.7818	57.3666		5.81134	4.89959	6.40314
0.807015	0.0590692	0.0678377	0.0919711		97.4267	28.7886	57.2242		5.80417	4.91188	6.44695
0.807431	0.0594008	0.067919	0.0923107		97.3366	28.8042	57.4147		5.80123	4.92085	6.30185
0.807848	0.0589535	0.068035	0.0923409		97.3155	28.7786	57.4631		5.80743	4.88192	6.43037
0.808265	0.0585326	0.0680264	0.0917839		97.2813	28.781	57.549		5.81163	4.89556	6.19209
0.808681	0.0590615	0.0682084	0.0924219		97.3314	28.8207	57.5332		5.79687	4.92725	6.44654
0.809098	0.0588237	0.0680485	0.0921251		97.2483	28.8313	57.6305		5.78633	4.93515	6.32429
0.809515	0.0589938	0.0681646	0.0919863		97.1118	28.8705	57.6321		5.81274	4.90854	6.25297
0.809931	0.0592509	0.0680262	0.0924164		97.0528	28.8983	57.6598		5.78725	4.88216	6.27591
0.810348	0.0592125	0.0676727	0.0919619		96.987	28.8993	57.7253		5.79851	4.87462	6.25095
0.810765	0.0593404	0.0678562	0.0923923		96.9959	28.8443	57.8599		5.79335	4.89548	6.31556
0.811181	0.0593309	0.0680489	0.0923021		97.0489	28.9281	57.7427		5.78199	4.90154	6.40501
0.811598	0.058872	0.0676585	0.092512		97.0037	28.9141	57.7376		5.75761	4.90747	6.28586
0.812015	0.0590378	0.0680321	0.0920474		96.9379	28.903	57.7263		5.77528	4.90613	6.52557
0.812431	0.0592555	0.0681069	0.0925628		96.9851	28.9309	57.7182		5.76313	4.90435	6.45352
0.812848	0.0591101	0.067895	0.0922783		96.8985	28.9422	57.8345		5.75358	4.91387	6.44523
0.813265	0.0593798	0.067978	0.0924007		96.9194	28.9567	57.9316		5.73988	4.89971	6.53506
0.813681	0.059093	0.0676802	0.0924472		96.8217	28.9851	57.8398		5.76413	4.90459	6.41576
0.814098	0.0595039	0.0676661	0.0926495		96.7524	28.9707	57.9409		5.75059	4.90682	6.44197
0.814515	0.0596085	0.0677436	0.0923383		96.7211	28.9977	57.9199		5.74522	4.9032	6.42474
0.814931	0.059608	0.068235	0.0923925		96.738	28.9972	57.8944		5.75101	4.87751	6.34584
0.815348	0.0593037	0.0674192	0.0924482		96.6334	29.0258	57.9849		5.75287	4.87129	6.35215
0.815765	0.0588837	0.0678869	0.0921142		96.6186	29.0133	57.919		5.74798	4.90856	6.40491
0.816181	0.0597721	0.0677912	0.0925425		96.6819	29.0369	58.0071		5.74921	4.9224	6.41597
0.816598	0.0588177	0.0678523	0.0923334		96.6683	29.0863	58.145		5.76021	4.93021	6.40895
0.817015	0.0592215	0.0677945	0.0924645		96.5992	29.1234	58.1952		5.72981	4.92808	6.41316
0.817431	0.0591333	0.0678168	0.0924287		96.4489	29.1189	58.1337		5.72699	4.93543	6.35324
0.817848	0.0593115	0.0676499	0.0921423		96.3674	29.1034	58.2623		5.72441	4.90091	6.30644
0.818265	0.0593308	0.0679682	0.0924736		96.3515	29.0982	58.1643		5.73955	4.88269	6.27524
0.818681	0.0590852	0.0676549	0.0924756		96.3019	29.1446	58.0435		5.73845	4.89444	6.21025
0.819098	0.0592556	0.0675796	0.0919409		96.2897	29.0671	58.1149		5.75062	4.90985	6.18007
0.819515	0.0595284	0.0679653	0.0920229		96.1744	29.0936	58.3131		5.74386	4.90893	6.32648
0.819931	0.0593579	0.0677437	0.0923612		96.1056	29.0863	58.3208		5.72608	4.92528	6.36927
0.820348	0.0585256	0.0678207	0.0924151		96.0916	29.1237	58.2268		5.72927	4.9576	6.29669
0.820765	0.0596795	0.0675286	0.0917888		96.0492	29.153	58.3922		5.74069	4.93813	6.2992
0.821181	0.0594453	0.0675785	0.092269		96.0284	29.2089	58.3205		5.72152	4.91439	6.48773
0.821598	0.0590559	0.0681468	0.0919071		96.0019	29.2204	58.4505		5.7272	4.92143	6.55272
0.822015	0.0594044	0.0678732	0.0924531		95.9174	29.1701	58.4541		5.72947	4.91165	6.34037
0.822431	0.0591398	0.0681483	0.0921422		95.9252	29.207	58.5691		5.72133	4.89997	6.37784
0.822848	0.0590262	0.0678056	0.0925706		95.8332	29.19	58.5615		5.70626	4.9305	6.36819
0.823265	0.0593289	0.0675399	0.0920651		95.7438	29.2178	58.647		5.73069	4.93335	6.24123
0.823681	0.0589707	0.0678929	0.0923904		95.7201	29.1886	58.7503		5.7237	4.89931	6.47747
0.824098	0.0588464	0.0676791	0.0923463		95.7042	29.2229	58.7669		5.73176	4.91226	6.52368
0.824515	0.0590039	0.0677585	0.0920159		95.6699	29.2673	58.6641		5.71171	4.92968	6.29077
0.824931	0.0595736	0.0678889	0.0926043		95.6761	29.2396	58.6351		5.71858	4.92465	6.28157
0.825348	0.0590433	0.0676717	0.0919555		95.6405	29.2427	58.7666		5.71737	4.91692	6.48069
0.825765	0.0591516	0.0674503	0.0923505		95.619	29.2767	58.7624		5.729	4.92623	6.36108
0.826181	0.059569	0.0675898	0.0921625		95.5856	29.2589	58.7895		5.72694	4.93431	6.28519
0.826598	0.0595052	0.0678588	0.0920465		95.5007	29.3059	58.8018		5.7215	4.91222	6.43685
0.827015	0.0593444	0.0677034	0.0924212		95.4765	29.3318	58.9989		5.7202	4.95153	6.46893
0.827431	0.0591104	0.0678055	0.0923018		95.4219	29.3042	59.1139		5.7167	4.95198	6.19107
0.827848	0.0589931	0.067901	0.0925686		95.4052	29.3477	59.1101		5.73244	4.93414	6.21103
0.828265	0.0587631	0.0677245	0.0924748		95.2971	29.3953	59.1438		5.71427	4.89766	6.4361
0.828681	0.0588834	0.0676444	0.0920844		95.3456	29.4049	59.0169		5.71663	4.93157	6.33121
0.829098	0.0593742	0.067725	0.0925943		95.3037	29.4262	59.1139		5.71185	4.87632	6.39683
0.829515	0.0592949	0.0679545	0.0922375		95.2939	29.4341	59.1478		5.71709	4.89381	6.4319
0.829931	0.05911	0.0676971	0.0927935		95.2226	29.4223	59.2819		5.71653	4.91464	6.18958
0.830348	0.0592459	0.0673284	0.0926024		95.1329	29.461	59.1871		5.72172	4.89419	6.37776
0.830765	0.0592633	0.0676173	0.0923271		95.0946	29.5015	59.1651		5.71918	4.88627	6.37654
0.831182	0.058756	0.0676602	0.0924274		95.0323	29.538	59.2344		5.72048	4.95963	6.13967
0.831598	0.059249	0.067393	0.0927551		94.9421	29.489	59.2399		5.7042	4.92546	6.25847
0.832015	0.0591335	0.0676622	0.0926771		94.9269	29.4852	59.2802		5.6899	4.9129	6.44786
0.832432	0.0590357	0.0678103	0.0925884		94.8445	29.5023	59.4494		5.70533	4.91906	6.48689
0.832848	0.0594104	0.067414	0.09258		94.8119	29.5659	59.4845		5.70053	4.92952	6.18859
0.833265	0.0592403	0.0676213	0.0922334		94.7504	29.5867	59.3626		5.66995	4.9176	6.19243
0.833682	0.0591566	0.0678434	0.0925282		94.7687	29.5506	59.4193		5.69524	4.9278	6.33641
0.834098	0.0588486	0.0673192	0.0918518		94.753	29.5877	59.5722		5.69688	4.93849	6.42693
0.834515	0.0593896	0.0676825	0.0924725		94.6073	29.5998	59.4806		5.67927	4.93097	6.44222
0.834932	0.0595672	0.0675389	0.0918185		94.5224	29.5566	59.5348		5.669	4.91335	6.2383
0.835348	0.0589233	0.0675777	0.0918026		94.4017	29.598	59.5063		5.66931	4.93755	6.27805
0.835765	0.0589775	0.0676956	0.0923563		94.3374	29.5635	59.7393		5.69734	4.94048	6.40794
0.836182	0.0588602	0.0668689	0.0922464		94.3325	29.5798	59.6707		5.6785	4.93409	6.27128
0.836598	0.0593504	0.0671825	0.0924131		94.3155	29.5903	59.7629		5.67793	4.92281	6.24078
0.837015	0.0587625	0.0676428	0.0920194		94.307	29.6436	59.6809		5.68087	4.94991	6.26742
0.837432	0.0594344	0.067337	0.0918884		94.2845	29.6413	59.6513		5.66716	4.92854	6.31947
0.837848	0.0591241	0.0675618	0.0920113		94.238	29.6518	59.7102		5.68644	4.9404	6.23779
0.838265	0.059399	0.0669672	0.0915773		94.1808	29.7022	59.6943		5.69134	4.9149	6.25609
0.838682	0.058537	0.0675944	0.0921573		94.1525	29.6996	59.8024		5.67536	4.90964	6.33625
0.839098	0.0587147	0.0674193	0.0924625		94.0891	29.7359	59.7009		5.66019	4.93677	6.39634
0.839515	0.059068	0.0668725	0.0923082		93.9958	29.6841	59.7254		5.66756	4.92789	6.30828
0.839932	0.059411	0.0677267	0.0917324		93.9354	29.7148	59.8257		5.6846	4.96123	6.3831
0.840348	0.0591303	0.0673201	0.0921267		93.9896	29.7467	59.8663		5.67178	4.96122	6.39336
0.840765	0.0593758	0.0671738	0.0917663		94.0056	29.7413	60.1166		5.66849	4.95877	6.32376
0.841182	0.0591557	0.067719	0.092204		93.872	29.7522	60.0132		5.67788	4.98623	6.32102
0.841598	0.0590097	0.0670278	0.0921947		93.806	29.7475	59.9479		5.67486	4.94003	6.3612
0.842015	0.058342	0.067616	0.0920283		93.7158	29.7488	59.9046		5.65715	4.92614	6.33794
0.842432	0.0592638	0.0673241	0.0916103		93.763	29.8069	60.0092		5.66151	4.92178	6.44932
0.842848	0.0591404	0.0676405	0.0923345		93.7514	29.8447	60.0812		5.65694	4.91198	6.33102
0.843265	0.0587852	0.0675133	0.0923049		93.6477	29.8445	60.2316		5.66199	4.93006	6.39855
0.843682	0.0587222	0.0673708	0.0915662		93.6323	29.8076	60.1277		5.66878	4.94681	6.21592
0.844098	0.0590531	0.0672181	0.0921471		93.5778	29.8452	60.1533		5.66072	4.92795	6.32022
0.844515	0.0589165	0.0675549	0.091379		93.4941	29.896	60.1426		5.65284	4.92116	6.19053
0.844932	0.0589753	0.0670699	0.0917448		93.4288	29.9415	60.2047		5.6465	4.92626	6.27765
0.845348	0.0593471	0.0673999	0.0911218		93.3812	29.9058	60.3886		5.65186	4.93717	6.4104
0.845765	0.0590951	0.0673068	0.0915911		93.3641	29.9518	60.3003		5.64493	4.91025	6.42096
0.846182	0.0597004	0.0671627	0.0915538		93.3713	29.9053	60.2542		5.64766	4.95555	6.47845
0.846598	0.0590189	0.0671049	0.0913228		93.3097	29.9047	60.2698		5.65097	4.92178	6.40746
0.847015	0.0586327	0.067068	0.0908819		93.237	29.8975	60.3315		5.66005	4.92483	6.39973
0.847432	0.0587344	0.0673611	0.0911098		93.2347	29.936	60.5042		5.63128	4.91563	6.43873
0.847848	0.05886	0.0671097	0.0911338		93.1449	29.9308	60.5128		5.64604	4.95392	6.43688
0.848265	0.0589163	0.0670563	0.0914198		93.1146	29.9251	60.4214		5.62794	4.95494	6.46116
0.848682	0.0587032	0.0671227	0.0909427		93.0204	29.9623	60.5022		5.64337	4.94807	6.43094
0.849098	0.0587311	0.066882	0.0911168		92.9141	29.9618	60.3864		5.62584	4.93617	6.20748
0.849515	0.0590056	0.0673285	0.0909489		92.904	29.9776	60.4273		5.63038	4.94947	6.44264
0.849932	0.0586187	0.0669298	0.0905158		92.9068	29.9937	60.5698		5.62266	4.93463	6.32276
0.850348	0.0587541	0.0670213	0.0910165		92.8558	30.0116	60.6113		5.59837	4.95393	6.40847
0.850765	0.0591293	0.0669777	0.0906634		92.8473	30.0258	60.6696		5.61109	4.94822	6.21046
0.851182	0.0584183	0.0670782	0.0907836		92.7316	30.018	60.7235		5.61745	4.92172	6.34506
0.851598	0.0583878	0.0669223	0.0907713		92.7758	30.0346	60.7499		5.60855	4.91314	6.39396
0.852015	0.0590153	0.0672042	0.0906275		92.66	30.0775	60.6931		5.62755	4.95725	6.35163
0.852432	0.0585212	0.0669689	0.0908184		92.6456	30.0631	60.7058		5.62059	4.96269	6.27541
0.852848	0.0587459	0.0669496	0.0910113		92.6901	30.0836	60.7662		5.60274	4.95154	6.37548
0.853265	0.058226	0.0670846	0.0908269		92.6006	30.0916	60.7368		5.59514	4.92118	6.27775
0.853682	0.0589623	0.0669179	0.0906907		92.4753	30.127	60.777		5.59869	4.92818	6.2447
0.854098	0.0585545	0.0670612	0.0908636		92.4379	30.106	60.7565		5.60599	4.91682	6.42228
0.854515	0.0580401	0.067063	0.0907774		92.372	30.1745	60.8556		5.59696	4.92626	6.44435
0.854932	0.0583999	0.0666938	0.0902338		92.3667	30.1797	60.7796		5.59446	4.95607	6.38682
0.855348	0.0590272	0.0667675	0.0910895		92.2987	30.1963	60.9413		5.60451	4.9642	6.15087
0.855765	0.0585968	0.0672495	0.090503		92.288	30.2037	60.8727		5.59733	4.96394	6.10659
0.856182	0.0582525	0.0668836	0.0903473		92.2542	30.1826	60.8634		5.58612	4.95474	6.23119
0.856598	0.0586268	0.0664985	0.091175		92.1738	30.1844	60.9302		5.57551	4.93173	6.35454
0.857015	0.0581967	0.0669989	0.0906034		92.1115	30.2549	60.9628		5.58363	4.91641	6.22417
0.857432	0.0584444	0.066793	0.0901602		92.1587	30.268	60.9679		5.59092	4.94488	6.22725
0.857848	0.0585106	0.0671379	0.0903896		92.072	30.224	61.0133		5.57917	4.93474	6.24663
0.858265	0.0588205	0.0664643	0.0906989		91.9914	30.2147	60.9481		5.57491	4.96013	6.33223
0.858682	0.0578629	0.0670302	0.0908837		91.9551	30.239	61.0543		5.56133	4.95704	6.36638
0.859098	0.0583984	0.0670046	0.0907366		91.9818	30.217	60.983		5.5664	4.94373	6.42742
0.859515	0.0585064	0.067182	0.090304		91.9024	30.2728	61.0662		5.55631	4.9177	6.17011
0.859932	0.0587584	0.0671385	0.0910316		91.8212	30.3053	61.1584		5.55988	4.94687	6.28271
0.860348	0.0581142	0.0669106	0.0911853		91.7892	30.3265	61.25		5.56401	4.9652	6.31875
0.860765	0.0587305	0.0673547	0.0905773		91.6474	30.3691	61.2373		5.57764	4.93685	6.36711
0.861182	0.0587025	0.0666002	0.090415		91.5602	30.4159	61.3182		5.57885	4.94668	6.35668
0.861598	0.0585266	0.0668624	0.090504		91.5162	30.3897	61.3189		5.54944	4.9048	6.38849
0.862015	0.0583786	0.06693	0.0911076		91.4916	30.3848	61.4335		5.55346	4.91107	6.2812
0.862432	0.0587222	0.067232	0.090776		91.5168	30.3741	61.2795		5.57366	4.94461	6.29955
0.862848	0.0587047	0.067295	0.0909605		91.4791	30.3531	61.3684		5.57036	4.9381	6.33858
0.863265	0.0588111	0.0668972	0.0903202		91.4454	30.3661	61.3735		5.55775	4.91411	6.31192
0.863682	0.0586308	0.0665166	0.0912727		91.3255	30.3608	61.3917		5.5555	4.94194	6.25747
0.864098	0.0590862	0.0670371	0.0904379		91.3447	30.3827	61.4715		5.55081	4.95774	6.23882
0.864515	0.0583074	0.06682	0.0907643		91.2787	30.4338	61.5014		5.55783	4.93363	6.39603
0.864932	0.0584652	0.0667509	0.0906011		91.2547	30.4558	61.4953		5.55509	4.95296	6.43816
0.865348	0.05871	0.0668363	0.0908949		91.1703	30.455	61.567		5.56514	4.97001	6.33182
0.865765	0.058365	0.0668735	0.0912108		91.1009	30.4513	61.6112		5.54959	4.97257	6.39587
0.866182	0.058221	0.0670651	0.0905154		91.1287	30.4565	61.7231		5.55271	4.95952	6.23325
0.866598	0.0586984	0.0669645	0.0905752		91.0356	30.4501	61.6735		5.56048	4.95844	6.31401
0.867015	0.058585	0.0668508	0.0912765		90.9398	30.4427	61.566		5.53481	4.96079	6.46131
0.867432	0.0590945	0.0671423	0.0911277		90.9779	30.5362	61.583		5.55016	4.92712	6.29622
0.867848	0.0583511	0.0666673	0.0909248		90.9306	30.5086	61.6175		5.54429	4.9395	6.20457
0.868265	0.0582787	0.0667021	0.0910505		90.8944	30.5222	61.6284		5.53584	4.97236	6.32834
0.868682	0.0587497	0.0668949	0.0904122		90.844	30.5327	61.7262		5.54006	4.95287	6.29211
0.869098	0.05854	0.0666683	0.0907181		90.8376	30.6087	61.6732		5.53538	4.96563	6.44636
0.869515	0.0583783	0.066751	0.0906518		90.7388	30.6177	61.7045		5.52276	4.95291	6.30539
0.869932	0.0584971	0.067321	0.0903639		90.7031	30.6158	61.832		5.53003	4.9557	6.34004
0.870348	0.0585368	0.066549	0.0905047		90.6679	30.6006	61.7888		5.52252	4.99658	6.32838
0.870765	0.0578564	0.066812	0.0907475		90.5816	30.624	61.9262		5.5302	4.98481	6.36302
0.871182	0.058786	0.0667691	0.0906865		90.5652	30.6324	61.9564		5.53656	4.95308	6.31291
0.871598	0.0582148	0.0668472	0.0909459		90.5817	30.6175	61.8938		5.52809	4.97845	6.35433
0.872015	0.0587141	0.0664353	0.0903243		90.4929	30.6299	61.9513		5.53739	4.97333	6.19992
0.872432	0.0585532	0.0668436	0.0907667		90.4148	30.6329	62.0112		5.51641	4.97381	6.40365
0.872848	0.0584552	0.066823	0.0905366		90.434	30.6616	62.0851		5.53274	4.97241	6.35757
0.873265	0.0593611	0.0668081	0.0909806		90.3659	30.7249	62.1788		5.54355	4.96249	6.21998
0.873682	0.0586428	0.0665035	0.0904557		90.3329	30.731	62.1654		5.53202	4.97046	6.10733
0.874098	0.059139	0.0670391	0.091092		90.2825	30.7245	62.2526		5.52973	4.94377	6.24221
0.874515	0.0581518	0.0665974	0.0902133		90.1499	30.7001	62.3417		5.52048	4.94531	6.17474
0.874932	0.0584323	0.0669689	0.0910661		90.0984	30.7097	62.1934		5.5394	4.96222	6.38536
0.875348	0.0587847	0.066496	0.0905936		90.1235	30.7787	62.1583		5.54049	4.96436	6.29064
0.875765	0.0589056	0.066748	0.0899347		90.0776	30.8343	62.2171		5.54159	4.95735	6.23499
0.876182	0.0588061	0.0667588	0.0913466		90.0153	30.8425	62.205		5.53422	4.94722	6.23155
0.876598	0.0586738	0.0666014	0.0904783		89.9515	30.8362	62.2673		5.52181	4.98123	6.25504
0.877015	0.0585284	0.0671702	0.0906397		89.8871	30.8594	62.4644		5.51368	4.97491	6.36646
0.877432	0.0585719	0.0665701	0.0909524		89.8813	30.8875	62.4497		5.54336	4.98166	6.50342
0.877848	0.0583768	0.066714	0.0901835		89.8645	30.907	62.6806		5.52924	4.96955	6.34182
0.878265	0.0582462	0.0666175	0.0907213		89.821	30.8798	62.6165		5.53057	4.96877	6.24837
0.878682	0.058772	0.0667818	0.0906172		89.7248	30.8495	62.5173		5.52213	4.95687	6.18611
0.879098	0.058402	0.0671477	0.0908069		89.6576	30.8943	62.3974		5.52127	5.00345	6.14708
0.879515	0.0584225	0.0666938	0.0907045		89.5886	30.9522	62.4566		5.52799	4.98636	6.20001
0.879932	0.0587928	0.0666935	0.0913225		89.4912	30.9421	62.4756		5.52213	5.02702	6.17415
0.880348	0.0588872	0.0670253	0.0903317		89.5172	30.918	62.5632		5.50132	4.99355	6.24515
0.880765	0.0585552	0.0665417	0.0912711		89.5102	30.9544	62.7504		5.49825	4.97115	6.17667
0.881182	0.0591165	0.0669564	0.0907991		89.423	30.975	62.7629		5.51696	4.95417	6.14161
0.881598	0.0586116	0.066764	0.0904972		89.3419	30.9636	62.7472		5.51148	4.97023	6.18902
0.882015	0.0586104	0.0668249	0.0907239		89.3371	30.9901	62.6879		5.54534	4.96368	6.45341
0.882432	0.0581401	0.0667595	0.0907052		89.2816	31.0028	62.6681		5.52591	4.92388	6.2718
0.882848	0.0586792	0.0667405	0.0909791		89.2313	31.0005	62.7753		5.51034	4.95074	6.2407
0.883265	0.0586392	0.0667441	0.0912215		89.1945	31.0489	62.8836		5.51602	4.96483	6.10441
0.883682	0.0589944	0.0669156	0.090165		89.1704	31.0071	62.8964		5.50742	4.9741	6.19436
0.884098	0.0587169	0.0664951	0.090749		89.113	31.0123	62.9458		5.51184	4.96858	6.16098
0.884515	0.0586982	0.0667051	0.0907239		89.0561	31.0786	62.9752		5.49164	4.96887	6.31881
0.884932	0.0589081	0.0666319	0.090675		89.0352	31.0954	62.9505		5.48278	5.0011	6.22938
0.885348	0.0587007	0.0669551	0.0907174		88.9636	31.0762	63.0526		5.51848	5.00407	6.45527
0.885765	0.0589063	0.0664793	0.0901559		88.9158	31.095	63.1707		5.51666	4.9727	6.35119
0.886182	0.0586842	0.0665801	0.090785		88.8694	31.0876	63.1224		5.50894	4.96269	6.27517
0.886598	0.0587699	0.0663952	0.0908909		88.8158	31.1245	63.0844		5.52222	4.99326	6.13963
0.887015	0.0591846	0.0664662	0.090571		88.7284	31.1091	63.0522		5.52519	4.97315	6.23696
0.887432	0.0588312	0.0663475	0.0907387		88.6961	31.1026	63.2276		5.48691	4.9946	6.21498
0.887848	0.0584879	0.0664735	0.0905013		88.6674	31.1351	63.2375		5.51015	5.00791	6.1173
0.888265	0.0580456	0.066807	0.091067		88.6268	31.19	63.3154		5.52332	5.01671	6.2044
0.888682	0.0585133	0.0666094	0.0907593		88.5962	31.1747	63.1896		5.51034	4.9946	6.32506
0.889098	0.058664	0.066127	0.0906041		88.5865	31.1995	63.3594		5.51048	4.98169	6.29965
0.889515	0.0583413	0.0662358	0.090773		88.5054	31.2088	63.2898		5.50419	4.96304	6.31337
0.889932	0.0587913	0.0665691	0.0904753		88.4718	31.1885	63.3155		5.48692	4.99533	6.12702
0.890348	0.0581454	0.0663455	0.0903017		88.4175	31.135	63.283		5.46569	4.96661	6.19812
0.890765	0.0588916	0.0666716	0.0901712		88.4062	31.2169	63.445		5.48918	4.98421	6.44974
0.891182	0.0586064	0.0666855	0.0900555		88.3441	31.2486	63.2966		5.50077	4.99985	6.25017
0.891598	0.0582328	0.0666384	0.0902494		88.3698	31.2986	63.4276		5.49122	4.98928	6.35171
0.892015	0.0587158	0.0664234	0.0902842		88.2183	31.3109	63.4363		5.49284	4.98419	6.25572
0.892432	0.0577188	0.0666004	0.090554		88.1967	31.3193	63.4246		5.49345	4.9834	6.31779
0.892848	0.0587561	0.0664749	0.0905525		88.1199	31.3302	63.4238		5.49173	4.96523	6.37539
0.893265	0.058523	0.0663289	0.0902477		88.0979	31.3462	63.418		5.49341	4.96266	6.31309
0.893682	0.0579407	0.066567	0.0898895		88.0333	31.3311	63.4585		5.4927	4.95331	6.20139
0.894099	0.0586382	0.0663381	0.0901429		88.0782	31.3377	63.4207		5.50497	4.97503	6.34759
0.894515	0.0583966	0.0664255	0.0899524		87.9537	31.3569	63.5541		5.47997	5.00621	6.21906
0.894932	0.0586401	0.0663353	0.0898902		87.9004	31.4356	63.5707		5.47663	5.01519	6.1964
0.895349	0.0583689	0.0664083	0.0902554		87.8624	31.4558	63.5792		5.47932	4.98458	6.28921
0.895765	0.0583466	0.0662881	0.0907619		87.7941	31.4445	63.6027		5.47377	4.99456	6.20083
0.896182	0.0582992	0.0668616	0.0902511		87.7775	31.4195	63.6662		5.46504	4.99215	6.26248
0.896599	0.0582194	0.0664629	0.0897697		87.7218	31.4258	63.695		5.47476	4.95185	6.29937
0.897015	0.058301	0.0661486	0.0899176		87.6981	31.4277	63.875		5.48968	4.99148	6.27889
0.897432	0.0583578	0.0662464	0.0901766		87.6169	31.4647	63.8146		5.48715	4.99837	6.19984
0.897849	0.0583833	0.0664195	0.0900323		87.5713	31.5561	63.8032		5.4687	5.00667	6.38611
0.898265	0.0583946	0.0664169	0.0899631		87.5641	31.5245	63.7656		5.46314	5.00888	6.31088
0.898682	0.0584366	0.0661093	0.0903324		87.491	31.5313	63.704		5.44592	4.97565	6.10154
0.899099	0.0586735	0.0662858	0.0895173		87.4994	31.5356	63.6955		5.45933	4.98479	6.08805
0.899515	0.0583765	0.0661957	0.090254		87.4128	31.5086	63.8962		5.46456	4.99109	6.13004
0.899932	0.0577446	0.0662031	0.0897251		87.3598	31.5399	63.8797		5.456	4.99345	6.30111
0.900349	0.0582312	0.0664171	0.089594		87.281	31.5528	63.7786		5.46007	5.00483	6.17267
0.900765	0.0583376	0.0662026	0.0896602		87.2424	31.5683	63.8908		5.47772	5.00192	6.38376
0.901182	0.0579429	0.0661355	0.0899669		87.2168	31.5653	63.8798		5.46638	4.9797	6.39
0.901599	0.0583472	0.0662768	0.089671		87.1715	31.5689	64.0013		5.45228	4.95827	6.32435
0.902015	0.0578063	0.0661324	0.0895122		87.1393	31.6124	64.0755		5.43958	4.98566	6.41352
0.902432	0.0583094	0.0660147	0.0893982		87.0389	31.5927	64.0136		5.45787	4.96975	6.45277
0.902849	0.0580951	0.0661099	0.0899626		86.9573	31.6066	64.0286		5.44054	4.99606	6.26406
0.903265	0.0581091	0.0662863	0.0899721		86.9628	31.6316	64.0577		5.45566	5.01048	6.28588
0.903682	0.0581726	0.0661491	0.0895065		86.9347	31.6413	64.2346		5.45627	4.98465	6.30731
0.904099	0.0586417	0.0658783	0.0900365		86.8709	31.6787	64.1689		5.45916	4.98054	6.15221
0.904515	0.0581626	0.0661978	0.0899734		86.8777	31.6725	64.2204		5.42761	4.98903	6.38278
0.904932	0.0579868	0.0662199	0.0896772		86.8675	31.7137	64.1137		5.44902	5.01063	6.35202
0.905349	0.0576164	0.0664591	0.0899328		86.7656	31.7022	64.0587		5.45056	5.0144	6.2366
0.905765	0.0583422	0.0659755	0.0896431		86.7659	31.7363	64.0431		5.43922	5.01432	6.22767
0.906182	0.0584162	0.0663945	0.0897725		86.6783	31.7302	64.2354		5.43077	5.00259	6.27976
0.906599	0.0580498	0.0662446	0.0900489		86.6458	31.7565	64.026		5.42554	5.01381	6.29171
0.907015	0.0576726	0.066081	0.0896447		86.569	31.7752	64.1694		5.43153	5.04047	6.30682
0.907432	0.058735	0.0663852	0.0901068		86.5389	31.7832	64.2297		5.42043	5.02543	6.26687
0.907849	0.0583874	0.0659317	0.0899196		86.4082	31.8199	64.2879		5.42005	5.03381	6.26446
0.908265	0.0579166	0.0662529	0.0896681		86.3883	31.8634	64.3292		5.42465	5.00091	6.31757
0.908682	0.0585033	0.0658891	0.0896146		86.3754	31.8716	64.3892		5.43336	5.03662	6.45063
0.909099	0.0579854	0.0660893	0.0902914		86.326	31.8274	64.3764		5.42967	5.02359	6.2702
0.909515	0.0581413	0.0660354	0.089806		86.3205	31.8653	64.6047		5.45479	5.00738	6.272
0.909932	0.0583205	0.0665102	0.0898034		86.2239	31.9196	64.4975		5.4448	4.99975	6.1376
0.910349	0.0583218	0.0665024	0.0894126		86.1808	31.9354	64.4183		5.4165	4.98172	6.19624
0.910765	0.0574674	0.0661825	0.090133		86.1272	31.9012	64.4561		5.4283	4.99305	6.28317
0.911182	0.05819	0.0665433	0.0901555		86.1068	31.858	64.6223		5.42871	5.0082	6.37594
0.911599	0.0584202	0.0659031	0.0897182		86.0712	31.8794	64.5321		5.42031	4.9899	6.42966
0.912015	0.0583639	0.0662044	0.0900568		86.0251	31.9537	64.6636		5.42241	4.97622	6.17155
0.912432	0.0578521	0.066024	0.090176		85.993	31.9792	64.5701		5.42024	5.01605	6.25014
0.912849	0.0582947	0.0661855	0.0898229		85.953	31.9824	64.5834		5.42504	5.0078	6.22999
0.913265	0.0584073	0.066541	0.0895061		85.8957	32.0256	64.8419		5.41828	4.98535	6.30703
0.913682	0.0581057	0.0659479	0.0896584		85.8366	31.9884	64.8097		5.39359	4.97125	6.24189
0.914099	0.0579796	0.0667152	0.0902869		85.7741	32.0523	65.0698		5.41315	4.94714	6.31824
0.914515	0.0579007	0.0661793	0.0904623		85.7627	32.0821	65.8919		5.41176	4.96994	6.28127
0.914932	0.0585634	0.0666275	0.0898393		85.6852	32.0375	65.6367		5.42964	4.99116	6.22325
0.915349	0.0580336	0.06592	0.0901447		85.6388	32.0281	65.4031		5.43117	4.98352	6.10726
0.915765	0.058401	0.066252	0.0899896		85.6122	32.0359	65.3509		5.40371	5.00447	6.13084
[truncated: 5,407 more rows]

## Sheet: Panel D
Current production from L. plantarum NCIMB8826 and two strains of Lactococcus lactis.
time/d	NCIMB8826 (mA)	NCIMB8826			time/d	Il1403 (mA)	Il1403 (mA)				time/d	KF147 (mA)	KF147 (mA)
0	1.12905	1.70539			0	0.0133179	0.00423718				0	0.0336535	0.204904
0.000416667	0.449742	0.473659			0.000416667	0.013193	0.00335882				0.000416667	0.0215114	0.1345
0.000833333	0.411619	0.445809			0.000833333	0.0132995	0.00327322				0.000833333	0.0165009	0.12301
0.00125	0.40374	0.428808			0.00125	0.0132201	0.00318841				0.00125	0.0139614	0.117363
0.00166667	0.387313	0.413105			0.00166667	0.0131628	0.00308784				0.00166667	0.0124037	0.113884
0.00208333	0.380367	0.407443			0.00208333	0.0131512	0.00326379				0.00208333	0.0113281	0.110361
0.0025	0.373502	0.398544			0.0025	0.0130738	0.00316626				0.0025	0.0105589	0.107172
0.00291667	0.374801	0.395041			0.00291667	0.0131924	0.0031307				0.00291667	0.0100199	0.105007
0.00333333	0.369857	0.386856			0.00333333	0.0132059	0.00310872				0.00333333	0.00957548	0.10382
0.00375	0.363507	0.378959			0.00375	0.0133172	0.00309716				0.00375	0.00925374	0.10219
0.00416667	0.364313	0.383163			0.00416667	0.0132549	0.00303178				0.00416667	0.00900755	0.100253
0.00458333	0.370164	0.360985			0.00458333	0.0132203	0.00326523				0.00458333	0.00872418	0.0984775
0.005	0.350403	0.33856			0.005	0.0132065	0.00273275				0.005	0.00850726	0.0964161
0.00541667	0.343897	0.330312			0.00541667	0.0130662	0.00266515				0.00541667	0.00836336	0.0955619
0.00583333	0.339838	0.330848			0.00583333	0.0131891	0.00260323				0.00583333	0.00823512	0.0945762
0.00625	0.331004	0.319627			0.00625	0.0131542	0.00260776				0.00625	0.00808528	0.0931178
0.00666667	0.330856	0.321286			0.00666667	0.0131776	0.00258519				0.00666667	0.00797903	0.0913141
0.00708333	0.325826	0.322013			0.00708333	0.0131197	0.00254424				0.00708333	0.00788242	0.0904765
0.0075	0.326038	0.317096			0.0075	0.0129913	0.00270404				0.0075	0.00782634	0.0894009
0.00791667	0.321689	0.311616			0.00791667	0.0129615	0.00258746				0.00791667	0.0077271	0.0876876
0.00833333	0.323269	0.310525			0.00833333	0.0132455	0.00257932				0.00833333	0.00764183	0.0871038
0.00875	0.316824	0.308875			0.00875	0.0131389	0.00253828				0.00875	0.007657	0.0855971
0.00916667	0.316556	0.306868			0.00916667	0.0130149	0.00253603				0.00916667	0.00754286	0.0840665
0.00958333	0.31659	0.302822			0.00958333	0.0132607	0.00249287				0.00958333	0.00750586	0.0837627
0.01	0.315714	0.298946			0.01	0.0131063	0.00254676				0.01	0.00747278	0.0821252
0.0104167	0.311918	0.299797			0.0104167	0.0129758	0.00254944				0.0104167	0.00736108	0.0816831
0.0108333	0.311371	0.300774			0.0108333	0.0130469	0.00248146				0.0108333	0.00734656	0.0803678
0.01125	0.311836	0.300144			0.01125	0.0129796	0.00240433				0.01125	0.00734402	0.0799644
0.0116667	0.311066	0.298614			0.0116667	0.01307	0.00239164				0.0116667	0.00725013	0.0786276
0.0120833	0.306432	0.295465			0.0120833	0.0129994	0.0024699				0.0120833	0.00725681	0.0772736
0.0125	0.305229	0.293906			0.0125	0.0131424	0.00247297				0.0125	0.00728609	0.0767141
0.0129167	0.303759	0.293299			0.0129167	0.0130513	0.00242625				0.0129167	0.00721841	0.0755997
0.0133333	0.301074	0.290908			0.0133333	0.0131024	0.00247129				0.0133333	0.00716222	0.0748581
0.01375	0.301087	0.286554			0.01375	0.0129296	0.00245032				0.01375	0.00717463	0.0740525
0.0141667	0.301472	0.285075			0.0141667	0.0129807	0.00245007				0.0141667	0.0070824	0.0730138
0.0145833	0.296185	0.284353			0.0145833	0.0129577	0.00240501				0.0145833	0.00709633	0.0718953
0.015	0.295971	0.283978			0.015	0.0131064	0.00245661				0.015	0.0070443	0.0709395
0.0154167	0.293762	0.283298			0.0154167	0.0130131	0.00238805				0.0154167	0.0070517	0.0707346
0.0158333	0.293955	0.282369			0.0158333	0.0130579	0.00239456				0.0158333	0.00702445	0.0696283
0.01625	0.292564	0.277794			0.01625	0.0131615	0.00236811				0.01625	0.00697108	0.0686283
0.0166667	0.292296	0.274679			0.0166667	0.0130805	0.00249367				0.0166667	0.00701213	0.0679053
0.0170833	0.290244	0.277672			0.0170833	0.0129742	0.00239905				0.0170833	0.00696871	0.0670979
0.0175	0.289947	0.272681			0.0175	0.0131015	0.00241993				0.0175	0.00690725	0.066207
0.0179167	0.286866	0.264466			0.0179167	0.0129947	0.00239642				0.0179167	0.00697029	0.0653978
0.0183333	0.287018	0.263005			0.0183333	0.0130382	0.00247206				0.0183333	0.00693695	0.0646361
0.01875	0.284446	0.269232			0.01875	0.0129894	0.00249903				0.01875	0.00690824	0.063884
0.0191667	0.330997	0.972795			0.0191667	0.0130102	0.00246128				0.0191667	0.00691149	0.0634081
0.0195833	0.312501	0.334362			0.0195833	0.0129739	0.00260438				0.0195833	0.00686471	0.0625312
0.02	0.287792	0.272275			0.02	0.0129413	0.00983513				0.02	0.0067868	0.0618677
0.0204167	0.27646	0.258833			0.0204167	0.0129058	0.00703353				0.0204167	0.00685822	0.0609367
0.0208333	0.271582	0.253918			0.0208333	0.0130577	0.00672417				0.0208333	0.00677561	0.0602862
0.02125	0.271513	0.254018			0.02125	0.0130177	0.00687829				0.02125	0.00678998	0.0599678
0.0216667	0.268157	0.254157			0.0216667	0.0129623	0.00717852				0.0216667	0.00678386	0.05962
0.0220833	0.266779	0.249769			0.0220833	0.0129879	0.00757976				0.0220833	0.00679168	0.0592133
0.0225	0.268241	0.246316			0.0225	0.0129621	0.00804259				0.0225	0.00675935	0.0582156
0.0229167	0.266861	0.247635			0.0229167	0.0130365	0.00847895				0.0229167	0.00673004	0.0573857
0.0233333	0.266668	0.245374			0.0233333	0.012946	0.00893542				0.0233333	0.0067052	0.0569864
0.02375	0.267243	0.247793			0.02375	0.0129308	0.00942232				0.02375	0.00674527	0.056274
0.0241667	0.266756	0.248622			0.0241667	0.0128812	0.0100383				0.0241667	0.00670343	0.0553011
0.0245833	0.268372	0.246048			0.0245833	0.0128841	0.0106144				0.0245833	0.00672518	0.0552106
0.025	0.267885	0.245189			0.025	0.0129332	0.0111272				0.025	0.00669135	0.0545291
0.0254167	0.266024	0.243378			0.0254167	0.012764	0.0117085				0.0254167	0.0066718	0.0540771
0.0258333	0.265806	0.246958			0.0258333	0.0128898	0.0122644				0.0258333	0.00671847	0.0533018
0.02625	0.267255	0.247409			0.02625	0.0129933	0.0127002				0.02625	0.00670915	0.0528666
0.0266667	0.264657	0.24361			0.0266667	0.013017	0.013143				0.0266667	0.00666907	0.0522663
0.0270833	0.263772	0.243848			0.0270833	0.0128482	0.0136672				0.0270833	0.00664716	0.0516126
0.0275	0.264801	0.239305			0.0275	0.0128807	0.0140956				0.0275	0.00663298	0.0513181
0.0279167	0.265314	0.245073			0.0279167	0.0129979	0.0144816				0.0279167	0.00662399	0.0506955
0.0283333	0.265468	0.249216			0.0283333	0.0129386	0.0149804				0.0283333	0.00665794	0.0507031
0.02875	0.266462	0.246332			0.02875	0.0129169	0.0152058				0.02875	0.00656847	0.0501608
0.0291667	0.264973	0.242827			0.0291667	0.0129573	0.0156015				0.0291667	0.00661218	0.0495954
0.0295833	0.265054	0.242687			0.0295833	0.0129628	0.0158355				0.0295833	0.00655027	0.0488768
0.03	0.260146	0.245973			0.03	0.0128446	0.0161857				0.03	0.00658211	0.0483556
0.0304167	0.263169	0.240656			0.0304167	0.0128333	0.0164586				0.0304167	0.00654794	0.0481627
0.0308333	0.262486	0.24473			0.0308333	0.0128859	0.0167772				0.0308333	0.00655505	0.0477271
0.03125	0.26109	0.242549			0.03125	0.0129033	0.0170156				0.03125	0.00655466	0.0472629
0.0316667	0.2626	0.241268			0.0316667	0.0129227	0.0173631				0.0316667	0.00655274	0.0467811
0.0320833	0.260304	0.241639			0.0320833	0.0128878	0.0176881				0.0320833	0.0065745	0.0461428
0.0325	0.259456	0.243443			0.0325	0.0127954	0.0179548				0.0325	0.00649449	0.0457077
0.0329167	0.257849	0.243351			0.0329167	0.012808	0.0183475				0.0329167	0.00654061	0.0453384
0.0333333	0.259517	0.242014			0.0333333	0.0127884	0.018575				0.0333333	0.00648308	0.0448165
0.03375	0.259105	0.240224			0.03375	0.0128225	0.0187691				0.03375	0.00651414	0.0446895
0.0341667	0.256321	0.23893			0.0341667	0.0129078	0.0191261				0.0341667	0.00652184	0.0445383
0.0345833	0.260508	0.239038			0.0345833	0.0128113	0.0194658				0.0345833	0.00652008	0.0439101
0.035	0.261824	0.238662			0.035	0.0127504	0.0199557				0.035	0.00653139	0.0434836
0.0354167	0.259075	0.23941			0.0354167	0.0128785	0.0200356				0.0354167	0.00647009	0.0429719
0.0358333	0.258423	0.238546			0.0358333	0.0126789	0.0202527				0.0358333	0.00651466	0.0428285
0.03625	0.258439	0.235431			0.03625	0.0127504	0.0206638				0.03625	0.00646776	0.0422381
0.0366667	0.257989	0.237391			0.0366667	0.0127717	0.0211012				0.0366667	0.00645176	0.0418226
0.0370833	0.25816	0.239496			0.0370833	0.0128723	0.021317				0.0370833	0.00640581	0.0417248
0.0375	0.257308	0.237135			0.0375	0.0129388	0.0216979				0.0375	0.00648937	0.0415348
0.0379167	0.257216	0.238099			0.0379167	0.0128014	0.02209				0.0379167	0.00643332	0.0413917
0.0383333	0.254594	0.237746			0.0383333	0.0128594	0.022437				0.0383333	0.00645243	0.0406501
0.03875	0.254995	0.238217			0.03875	0.0128583	0.0228449				0.03875	0.00640663	0.0403191
0.0391667	0.257236	0.237362			0.0391667	0.0128349	0.0228993				0.0391667	0.0064512	0.0401385
0.0395833	0.255632	0.236837			0.0395833	0.0128544	0.022934				0.0395833	0.00644059	0.0398582
0.04	0.257228	0.234658			0.04	0.0128583	0.0236202				0.04	0.00641665	0.0392293
0.0404167	0.254595	0.235578			0.0404167	0.0128113	0.0237342				0.0404167	0.00643774	0.0387724
0.0408333	0.254873	0.236066			0.0408333	0.0127745	0.0239407				0.0408333	0.00638418	0.0387002
0.04125	0.255003	0.231087			0.04125	0.0127697	0.0241492				0.04125	0.00633699	0.0384494
0.0416667	0.253495	0.233841			0.0416667	0.0127851	0.0245454				0.0416667	0.00649589	0.0380712
0.0420833	0.253984	0.234059			0.0420833	0.0127593	0.0248182				0.0420833	0.00636179	0.0378039
0.0425	0.253218	0.233537			0.0425	0.0128311	0.0250908				0.0425	0.00643596	0.0371753
0.0429167	0.252674	0.231734			0.0429167	0.0125479	0.0255304				0.0429167	0.00635883	0.0369169
0.0433333	0.251956	0.231873			0.0433333	0.0127911	0.0257775				0.0433333	0.00636159	0.0368585
0.04375	0.251794	0.232719			0.04375	0.0127522	0.026336				0.04375	0.00630981	0.0363713
0.0441667	0.249852	0.229648			0.0441667	0.0127762	0.0265794				0.0441667	0.00639829	0.0362936
0.0445833	0.250913	0.23019			0.0445833	0.0127491	0.0264817				0.0445833	0.00633272	0.0359669
0.045	0.248897	0.229194			0.045	0.0127399	0.0270051				0.045	0.00639245	0.035759
0.0454167	0.250735	0.230732			0.0454167	0.0126967	0.0271445				0.0454167	0.00631918	0.0355031
0.0458333	0.24973	0.230993			0.0458333	0.0127405	0.0273169				0.0458333	0.00633027	0.0351115
0.04625	0.248772	0.230768			0.04625	0.0127168	0.0275035				0.04625	0.00638939	0.0347501
0.0466667	0.249219	0.22881			0.0466667	0.0128038	0.0278186				0.0466667	0.00632138	0.0346563
0.0470833	0.249465	0.23023			0.0470833	0.0126415	0.0281515				0.0470833	0.00631453	0.0344525
0.0475	0.247203	0.230996			0.0475	0.0128191	0.0286875				0.0475	0.00632352	0.0341359
0.0479167	0.247807	0.231841			0.0479167	0.0125858	0.0288702				0.0479167	0.00630564	0.0343396
0.0483333	0.248586	0.229132			0.0483333	0.0127381	0.0289786				0.0483333	0.00632076	0.0342036
0.04875	0.251616	0.225171			0.04875	0.0126821	0.0296968				0.04875	0.00630073	0.0334922
0.0491667	0.248869	0.231792			0.0491667	0.0127325	0.029788				0.0491667	0.00624921	0.0331745
0.0495833	0.24666	0.230373			0.0495833	0.0126568	0.0301349				0.0495833	0.00630551	0.0328801
0.05	0.246551	0.226037			0.05	0.0127983	0.0302594				0.05	0.00626181	0.0326293
0.0504167	0.246494	0.225768			0.0504167	0.0127793	0.0305428				0.0504167	0.0062848	0.0324312
0.0508333	0.243587	0.225217			0.0508333	0.012704	0.0307183				0.0508333	0.0062245	0.0322597
0.05125	0.244714	0.225363			0.05125	0.0126919	0.0311065				0.05125	0.00627684	0.0322869
0.0516667	0.244256	0.226474			0.0516667	0.0127406	0.0312598				0.0516667	0.00624733	0.0316811
0.0520833	0.244514	0.2281			0.0520833	0.0127579	0.0311702				0.0520833	0.00622564	0.0315715
0.0525	0.245768	0.223764			0.0525	0.0125584	0.0317897				0.0525	0.00622245	0.0314802
0.0529167	0.244705	0.226677			0.0529167	0.0127008	0.0323573				0.0529167	0.00618347	0.0311433
0.0533333	0.241209	0.226321			0.0533333	0.0126545	0.0327099				0.0533333	0.00620707	0.0308646
0.05375	0.243152	0.224742			0.05375	0.0126685	0.0328954				0.05375	0.00621728	0.0305728
0.0541667	0.244008	0.223795			0.0541667	0.0127966	0.0329308				0.0541667	0.00612779	0.0303345
0.0545833	0.240933	0.225218			0.0545833	0.0126073	0.0332348				0.0545833	0.0061985	0.0301422
0.055	0.242104	0.223021			0.055	0.0126834	0.033549				0.055	0.00621114	0.0300086
0.0554167	0.242457	0.22504			0.0554167	0.0127412	0.0339925				0.0554167	0.00620114	0.0298319
0.0558333	0.240655	0.221894			0.0558333	0.0127233	0.0341322				0.0558333	0.00618237	0.0294255
0.05625	0.24055	0.22161			0.05625	0.0125218	0.0342262				0.05625	0.00622571	0.0295361
0.0566667	0.243633	0.220773			0.0566667	0.0126418	0.0348103				0.0566667	0.00621045	0.0290995
0.0570833	0.241406	0.2249			0.0570833	0.0128463	0.0350981				0.0570833	0.00610302	0.0288938
0.0575	0.242132	0.221857			0.0575	0.0126853	0.0351727				0.0575	0.0061682	0.0287656
0.0579167	0.240335	0.220154			0.0579167	0.0126816	0.0354476				0.0579167	0.00615333	0.0286828
0.0583333	0.239068	0.219793			0.0583333	0.0126652	0.03561				0.0583333	0.00617293	0.0285977
0.05875	0.23882	0.22097			0.05875	0.0127457	0.0356571				0.05875	0.00611389	0.0282679
0.0591667	0.238975	0.219019			0.0591667	0.0126633	0.0360339				0.0591667	0.00612437	0.028014
0.0595833	0.239906	0.221125			0.0595833	0.0126888	0.0360426				0.0595833	0.00619518	0.0280063
0.06	0.23721	0.222179			0.06	0.0127705	0.0365168				0.06	0.00616769	0.0278141
0.0604167	0.23796	0.216942			0.0604167	0.0127693	0.0368089				0.0604167	0.00610164	0.0275489
0.0608333	0.236602	0.219504			0.0608333	0.0126488	0.0374437				0.0608333	0.0061414	0.0274366
0.06125	0.237077	0.220723			0.06125	0.0127555	0.0378803				0.06125	0.00610054	0.0272691
0.0616667	0.236836	0.221844			0.0616667	0.0126868	0.0381158				0.0616667	0.00616756	0.0278517
0.0620833	0.235866	0.219637			0.0620833	0.0127675	0.0379226				0.0620833	0.00612411	0.0270292
0.0625	0.236364	0.219116			0.0625	0.0127143	0.038289				0.0625	0.00612252	0.0268607
0.0629167	0.236931	0.21749			0.0629167	0.0126857	0.0384969				0.0629167	0.00608894	0.0268867
0.0633333	0.235714	0.219119			0.0633333	0.0125366	0.0383205				0.0633333	0.00612112	0.0265625
0.06375	0.235108	0.219682			0.06375	0.0125509	0.0390545				0.06375	0.00612219	0.026522
0.0641667	0.235369	0.217859			0.0641667	0.0126534	0.0391565				0.0641667	0.00608511	0.0263411
0.0645833	0.234203	0.216475			0.0645833	0.0127513	0.039529				0.0645833	0.00606103	0.02613
0.065	0.233035	0.218581			0.065	0.012639	0.0396537				0.065	0.00605372	0.0260919
0.0654167	0.232924	0.216854			0.0654167	0.0126329	0.0389634				0.0654167	0.00613117	0.0259031
0.0658333	0.233263	0.21768			0.0658333	0.0128196	0.0395856				0.0658333	0.0060809	0.0256495
0.06625	0.232844	0.216303			0.06625	0.0126775	0.0400112				0.06625	0.00606815	0.0253188
0.0666667	0.231975	0.217035			0.0666667	0.0125652	0.0400954				0.0666667	0.00603853	0.025548
0.0670833	0.232932	0.216875			0.0670833	0.0126776	0.039934				0.0670833	0.00606614	0.0252833
0.0675	0.233772	0.213814			0.0675	0.0127533	0.0408193				0.0675	0.00611671	0.0250962
0.0679167	0.233602	0.213442			0.0679167	0.0125645	0.0412647				0.0679167	0.00607766	0.0248559
0.0683333	0.230201	0.215489			0.0683333	0.0126138	0.0411546				0.0683333	0.00611141	0.0248211
0.06875	0.232809	0.216144			0.06875	0.0125743	0.0407767				0.06875	0.00608226	0.0247574
0.0691667	0.230347	0.213481			0.0691667	0.0127286	0.0412896				0.0691667	0.00607998	0.0245805
0.0695833	0.229945	0.215003			0.0695833	0.0127639	0.0413781				0.0695833	0.00603993	0.0244665
0.07	0.230658	0.216428			0.07	0.0127933	0.0414997				0.07	0.00599072	0.024463
0.0704167	0.229359	0.212565			0.0704167	0.0126979	0.0416075				0.0704167	0.00604795	0.024212
0.0708333	0.230475	0.211116			0.0708333	0.0126869	0.0415547				0.0708333	0.00600859	0.0240253
0.07125	0.229171	0.214328			0.07125	0.0127717	0.0418607				0.07125	0.00605203	0.0239673
0.0716667	0.229714	0.213712			0.0716667	0.0126305	0.0426116				0.0716667	0.00601388	0.0240079
0.0720833	0.228539	0.213656			0.0720833	0.0126315	0.0424724				0.0720833	0.00600147	0.0237197
0.0725	0.229045	0.21379			0.0725	0.0126663	0.0428154				0.0725	0.00608103	0.0236684
0.0729167	0.227749	0.215126			0.0729167	0.0126625	0.0430056				0.0729167	0.00601289	0.0236413
0.0733333	0.228276	0.215153			0.0733333	0.0126401	0.0435063				0.0733333	0.00604744	0.0235857
0.07375	0.226297	0.216093			0.07375	0.0125942	0.0435113				0.07375	0.0059909	0.0234602
0.0741667	0.22747	0.216517			0.0741667	0.0127231	0.0442371				0.0741667	0.00599065	0.023439
0.0745833	0.22724	0.218134			0.0745833	0.0126823	0.0439635				0.0745833	0.00603268	0.0233174
0.075	0.227247	0.213003			0.075	0.0126043	0.0437573				0.075	0.0060101	0.0230299
0.0754167	0.225746	0.214346			0.0754167	0.0126402	0.0448665				0.0754167	0.00597352	0.0230758
0.0758333	0.227633	0.213916			0.0758333	0.0126981	0.0448939				0.0758333	0.0060819	0.022991
0.07625	0.227623	0.211246			0.07625	0.0126424	0.0447734				0.07625	0.00603806	0.022694
0.0766667	0.225945	0.212331			0.0766667	0.0126573	0.0447622				0.0766667	0.00598648	0.0227845
0.0770833	0.224353	0.212191			0.0770833	0.0127289	0.0450596				0.0770833	0.00597244	0.0227031
0.0775	0.225571	0.212016			0.0775	0.012631	0.0446258				0.0775	0.00594471	0.0224475
0.0779167	0.225823	0.211507			0.0779167	0.0126577	0.0452562				0.0779167	0.00601469	0.02234
0.0783333	0.226268	0.211528			0.0783333	0.0127288	0.0450105				0.0783333	0.00595197	0.0223481
0.07875	0.22494	0.213058			0.07875	0.0127162	0.0448575				0.07875	0.00601319	0.0221004
0.0791667	0.224414	0.208913			0.0791667	0.0126353	0.0452095				0.0791667	0.00596083	0.0219834
0.0795833	0.224254	0.208876			0.0795833	0.0127331	0.0455464				0.0795833	0.00598235	0.0220831
0.08	0.223498	0.209508			0.08	0.0126438	0.0459491				0.08	0.00594656	0.0218967
0.0804167	0.226393	0.210319			0.0804167	0.0126934	0.0464334				0.0804167	0.00597453	0.0218895
0.0808333	0.22546	0.209134			0.0808333	0.012744	0.0463695				0.0808333	0.00593016	0.0217913
0.08125	0.222273	0.209815			0.08125	0.0126265	0.0462569				0.08125	0.00598007	0.0216855
0.0816667	0.222059	0.209244			0.0816667	0.0126684	0.0468921				0.0816667	0.0059629	0.0216994
0.0820833	0.224101	0.209163			0.0820833	0.0125652	0.0466859				0.0820833	0.00599867	0.0222476
0.0825	0.22219	0.208074			0.0825	0.0126448	0.0472765				0.0825	0.0059203	0.0215115
0.0829167	0.223995	0.208186			0.0829167	0.0126794	0.0468112				0.0829167	0.00592912	0.0212932
0.0833333	0.222503	0.209651			0.0833333	0.012649	0.0459998				0.0833333	0.00598708	0.0212957
0.08375	0.222119	0.209362			0.08375	0.0126733	0.0481469				0.08375	0.00596136	0.0212976
0.0841667	0.221556	0.21257			0.0841667	0.0127302	0.0482186				0.0841667	0.005973	0.0208828
0.0845833	0.220897	0.209416			0.0845833	0.0126673	0.04978				0.0845833	0.00591338	0.0210119
0.085	0.219314	0.211745			0.085	0.0126037	0.0492595				0.085	0.00594191	0.0210542
0.0854167	0.21976	0.209986			0.0854167	0.012662	0.0492715				0.0854167	0.00593073	0.0209222
0.0858333	0.219401	0.206894			0.0858333	0.0125973	0.0493389				0.0858333	0.00594296	0.0208091
0.08625	0.22088	0.205629			0.08625	0.0127056	0.0489884				0.08625	0.00596321	0.0207327
0.0866667	0.222723	0.206588			0.0866667	0.0125282	0.0479678				0.0866667	0.00589609	0.0206435
0.0870833	0.220385	0.210299			0.0870833	0.012561	0.0489597				0.0870833	0.00587772	0.0206104
0.0875	0.219794	0.209351			0.0875	0.0126179	0.0485051				0.0875	0.00591326	0.0205435
0.0879167	0.220184	0.206745			0.0879167	0.0126086	0.0492595				0.0879167	0.00593581	0.0203889
0.0883333	0.219674	0.209161			0.0883333	0.0126341	0.0485984				0.0883333	0.00593731	0.02031
0.08875	0.218355	0.206846			0.08875	0.0126552	0.0493887				0.08875	0.00586189	0.0201527
0.0891667	0.218959	0.207788			0.0891667	0.0126485	0.0496218				0.0891667	0.00591117	0.0201598
0.0895833	0.219912	0.206713			0.0895833	0.0126193	0.049128				0.0895833	0.0059468	0.0200417
0.09	0.218712	0.207021			0.09	0.0126762	0.0489929				0.09	0.00590436	0.0200136
0.0904167	0.218559	0.204571			0.0904167	0.0126032	0.0496995				0.0904167	0.00585809	0.0198559
0.0908333	0.218075	0.205682			0.0908333	0.0126307	0.049409				0.0908333	0.00584082	0.0199058
0.09125	0.217526	0.208547			0.09125	0.0126808	0.0499954				0.09125	0.0058931	0.0198202
0.0916667	0.21652	0.205792			0.0916667	0.0125994	0.0498205				0.0916667	0.00586123	0.0198152
0.0920833	0.217219	0.206751			0.0920833	0.0125839	0.0496766				0.0920833	0.00587305	0.0196074
0.0925	0.217577	0.208696			0.0925	0.0125923	0.0494761				0.0925	0.00589614	0.019543
0.0929167	0.215791	0.210002			0.0929167	0.0126629	0.0500292				0.0929167	0.0058889	0.0195357
0.0933333	0.215406	0.206173			0.0933333	0.0126945	0.0501054				0.0933333	0.00583843	0.0194546
0.09375	0.21554	0.206272			0.09375	0.0126198	0.0490751				0.09375	0.00586534	0.0193827
0.0941667	0.217072	0.207348			0.0941667	0.0125683	0.0499775				0.0941667	0.00586408	0.0193817
0.0945833	0.21483	0.207309			0.0945833	0.0127226	0.0496536				0.0945833	0.00586128	0.0192509
0.095	0.213538	0.205813			0.095	0.0125962	0.0492755				0.095	0.00587329	0.0192242
0.0954167	0.215376	0.204977			0.0954167	0.0125243	0.0493533				0.0954167	0.00585558	0.0192883
0.0958333	0.217684	0.208613			0.0958333	0.0126928	0.0501133				0.0958333	0.00587921	0.0191301
0.09625	0.215007	0.206565			0.09625	0.0126483	0.0489441				0.09625	0.00589917	0.0190898
0.0966667	0.215042	0.204636			0.0966667	0.0127213	0.0491842				0.0966667	0.00586631	0.018945
0.0970833	0.215487	0.204353			0.0970833	0.0126259	0.0497423				0.0970833	0.00586329	0.0189285
0.0975	0.21361	0.203334			0.0975	0.0126008	0.0500918				0.0975	0.00587555	0.0188697
0.0979167	0.21358	0.20218			0.0979167	0.0125484	0.0498557				0.0979167	0.00580621	0.018608
0.0983333	0.214549	0.202751			0.0983333	0.0126403	0.0494936				0.0983333	0.00583042	0.0187263
0.09875	0.213507	0.20366			0.09875	0.0125526	0.0495096				0.09875	0.00582326	0.018674
0.0991667	0.214448	0.204405			0.0991667	0.0126634	0.0498715				0.0991667	0.00582974	0.0185852
0.0995833	0.216621	0.206219			0.0995833	0.0126264	0.0494434				0.0995833	0.00578837	0.0185104
0.1	0.214434	0.207524			0.1	0.0126381	0.0493703				0.1	0.00589302	0.0183469
0.100417	0.213377	0.205415			0.100417	0.0127121	0.0499657				0.100417	0.00584247	0.018222
0.100833	0.213723	0.204458			0.100833	0.012754	0.0502128				0.100833	0.00578143	0.0186773
0.10125	0.214309	0.203453			0.10125	0.012698	0.0498674				0.10125	0.00578543	0.0184749
0.101667	0.21343	0.203464			0.101667	0.0125265	0.0487138				0.101667	0.00579615	0.0181988
0.102083	0.214751	0.204027			0.102083	0.012821	0.0497681				0.102083	0.00584584	0.0181529
0.1025	0.213222	0.203903			0.1025	0.0126761	0.0499472				0.1025	0.00576978	0.0181135
0.102917	0.212291	0.202965			0.102917	0.0126717	0.0489504				0.102917	0.00583604	0.0181066
0.103333	0.211711	0.203136			0.103333	0.0125554	0.0482883				0.103333	0.00578069	0.0179821
0.10375	0.213034	0.202094			0.10375	0.0125062	0.0481745				0.10375	0.00579156	0.0180422
0.104167	0.212992	0.203091			0.104167	0.0127538	0.0485486				0.104167	0.00580829	0.0178363
0.104583	0.212126	0.20198			0.104583	0.0126787	0.0482548				0.104583	0.00581399	0.0178642
0.105	0.212212	0.202339			0.105	0.0127427	0.0496333				0.105	0.00579165	0.0178022
0.105417	0.211681	0.2037			0.105417	0.0127275	0.0496495				0.105417	0.00578791	0.0178364
0.105833	0.210111	0.203386			0.105833	0.0127788	0.0498119				0.105833	0.00580376	0.0175938
0.10625	0.208987	0.202572			0.10625	0.0126056	0.0492085				0.10625	0.00578229	0.0175594
0.106667	0.210073	0.201931			0.106667	0.0126088	0.0486553				0.106667	0.00579642	0.0175362
0.107083	0.210154	0.20182			0.107083	0.0125715	0.0490916				0.107083	0.00571623	0.0175476
0.1075	0.209484	0.202011			0.1075	0.0125475	0.0488589				0.1075	0.00584415	0.0175111
0.107917	0.211348	0.200542			0.107917	0.0125405	0.0486939				0.107917	0.00571205	0.0174752
0.108333	0.210694	0.202817			0.108333	0.0127252	0.0492298				0.108333	0.00580373	0.0174067
0.10875	0.210158	0.204641			0.10875	0.012857	0.049197				0.10875	0.00571277	0.017352
0.109167	0.211893	0.202905			0.109167	0.0126874	0.0492865				0.109167	0.00579388	0.0172149
0.109583	0.210665	0.201214			0.109583	0.0126939	0.0487603				0.109583	0.00572207	0.0172629
0.11	0.208886	0.203511			0.11	0.0126992	0.0487975				0.11	0.00577629	0.0172125
0.110417	0.211092	0.202886			0.110417	0.012584	0.0488611				0.110417	0.00579954	0.0170973
0.110833	0.211104	0.202884			0.110833	0.0125298	0.0484558				0.110833	0.00570184	0.0171611
0.11125	0.209314	0.201554			0.11125	0.0126775	0.0478541				0.11125	0.0057191	0.0170845
0.111667	0.209529	0.201442			0.111667	0.012725	0.0479706				0.111667	0.00574782	0.0170548
0.112083	0.209685	0.200969			0.112083	0.0125709	0.0490284				0.112083	0.00575006	0.0170046
0.1125	0.210553	0.203398			0.1125	0.0126668	0.0489638				0.1125	0.00576994	0.0169806
0.112917	0.208536	0.202464			0.112917	0.0125837	0.0483992				0.112917	0.00573053	0.0169529
0.113333	0.21025	0.201416			0.113333	0.0125725	0.0486046				0.113333	0.00572547	0.016802
0.11375	0.208635	0.202667			0.11375	0.0126473	0.0486397				0.11375	0.00571988	0.0167682
0.114167	0.207122	0.200179			0.114167	0.0128519	0.0476945				0.114167	0.00570459	0.0167281
0.114583	0.207616	0.20203			0.114583	0.0125625	0.0464076				0.114583	0.00576965	0.0165258
0.115	0.209802	0.200957			0.115	0.0127591	0.0466776				0.115	0.00574729	0.01657
0.115417	0.207401	0.200484			0.115417	0.0127781	0.0483581				0.115417	0.00570062	0.016687
0.115833	0.20816	0.199755			0.115833	0.0125857	0.0479144				0.115833	0.00570264	0.0165844
0.11625	0.208026	0.199991			0.11625	0.0126768	0.0491274				0.11625	0.0057238	0.0164596
0.116667	0.208874	0.201284			0.116667	0.012652	0.0499007				0.116667	0.00572283	0.0164776
0.117083	0.208858	0.201403			0.117083	0.0126721	0.0497313				0.117083	0.00567643	0.0164414
0.1175	0.208945	0.199922			0.1175	0.0126944	0.0487721				0.1175	0.00571441	0.0163506
0.117917	0.208127	0.199661			0.117917	0.0127887	0.0497888				0.117917	0.00577994	0.0160977
0.118333	0.207291	0.199243			0.118333	0.0125942	0.0494965				0.118333	0.00571613	0.0166361
0.11875	0.209047	0.20111			0.11875	0.0125168	0.0488572				0.11875	0.00571086	0.0162271
0.119167	0.209114	0.201148			0.119167	0.0126736	0.0490568				0.119167	0.00567634	0.0161345
0.119583	0.208113	0.202076			0.119583	0.012562	0.0477498				0.119583	0.00570565	0.016157
0.12	0.208529	0.201029			0.12	0.012568	0.0485311				0.12	0.00569659	0.016095
0.120417	0.208811	0.201747			0.120417	0.0126206	0.0489905				0.120417	0.00573782	0.0161698
0.120833	0.207656	0.203146			0.120833	0.0127852	0.048078				0.120833	0.00572429	0.0160201
0.12125	0.206786	0.201511			0.12125	0.0125174	0.047393				0.12125	0.00570604	0.0159953
0.121667	0.206681	0.199853			0.121667	0.0126309	0.0476251				0.121667	0.00572458	0.0159349
0.122083	0.206798	0.201329			0.122083	0.0126488	0.0480343				0.122083	0.00568646	0.0159424
0.1225	0.207336	0.202817			0.1225	0.0127196	0.0482633				0.1225	0.00569328	0.0158105
0.122917	0.206862	0.200622			0.122917	0.0126663	0.0474793				0.122917	0.00567167	0.0159643
0.123333	0.208454	0.199031			0.123333	0.0126878	0.0477102				0.123333	0.00569006	0.0157964
0.12375	0.20635	0.201294			0.12375	0.012573	0.0480066				0.12375	0.00565378	0.0160338
0.124167	0.207137	0.198538			0.124167	0.0127124	0.0476609				0.124167	0.0056556	0.0157446
0.124583	0.208287	0.197598			0.124583	0.0126787	0.0464189				0.124583	0.00572678	0.0156302
0.125	0.207545	0.198417			0.125	0.0125151	0.0449691				0.125	0.0056407	0.0157035
0.125417	0.206507	0.2029			0.125417	0.0126687	0.0446686				0.125417	0.00569219	0.015591
0.125833	0.207441	0.199472			0.125833	0.01268	0.0447255				0.125833	0.00562159	0.0156275
0.12625	0.205368	0.199186			0.12625	0.0127002	0.0443315				0.12625	0.00569329	0.0154487
0.126667	0.204643	0.199654			0.126667	0.0125393	0.0443242				0.126667	0.00565422	0.0155275
0.127083	0.206781	0.198998			0.127083	0.0127808	0.0445882				0.127083	0.00569073	0.0154808
0.1275	0.207071	0.200097			0.1275	0.012604	0.0440847				0.1275	0.00565931	0.0156155
0.127917	0.205965	0.19957			0.127917	0.0125663	0.0433544				0.127917	0.00563434	0.0153208
0.128333	0.206257	0.198134			0.128333	0.0125435	0.0435683				0.128333	0.00560604	0.015406
0.12875	0.207154	0.198888			0.12875	0.0126853	0.0450104				0.12875	0.00560557	0.0153434
0.129167	0.205261	0.197353			0.129167	0.0124729	0.0451767				0.129167	0.00569226	0.0153456
0.129583	0.204638	0.200485			0.129583	0.0125468	0.0439134				0.129583	0.00562152	0.0153102
0.13	0.204314	0.198523			0.13	0.0124975	0.0445624				0.13	0.00568058	0.0151867
0.130417	0.205146	0.198697			0.130417	0.0127343	0.0448754				0.130417	0.00566405	0.0151226
0.130833	0.205118	0.19886			0.130833	0.0126677	0.04452				0.130833	0.00563787	0.0151722
0.13125	0.205583	0.199031			0.13125	0.0124516	0.0435729				0.13125	0.0056653	0.0151057
0.131667	0.205351	0.19637			0.131667	0.0125068	0.0432204				0.131667	0.00569463	0.0150274
0.132083	0.205791	0.198036			0.132083	0.0125978	0.0436656				0.132083	0.00561055	0.0149118
0.1325	0.205357	0.19797			0.1325	0.0125614	0.043904				0.1325	0.00564305	0.0152501
0.132917	0.206111	0.19765			0.132917	0.0126424	0.0434647				0.132917	0.0056235	0.0150255
0.133333	0.206195	0.197009			0.133333	0.0124528	0.0440761				0.133333	0.00570621	0.0148205
0.13375	0.203528	0.199146			0.13375	0.0124747	0.0432759				0.13375	0.00565726	0.0154502
0.134167	0.204006	0.198887			0.134167	0.0125567	0.0427732				0.134167	0.00561052	0.0147638
0.134583	0.204425	0.196171			0.134583	0.012579	0.0436965				0.134583	0.005639	0.0147432
0.135	0.205125	0.198556			0.135	0.012469	0.0435244				0.135	0.00561866	0.0148569
0.135417	0.203611	0.198927			0.135417	0.0125966	0.0425808				0.135417	0.00563652	0.014735
0.135833	0.205139	0.199414			0.135833	0.0125458	0.0419628				0.135833	0.00566218	0.0153065
0.13625	0.203	0.197155			0.13625	0.012615	0.0422974				0.13625	0.00562275	0.0147104
0.136667	0.202369	0.195771			0.136667	0.0124607	0.0415253				0.136667	0.00565242	0.0146238
0.137083	0.202719	0.195458			0.137083	0.0125937	0.0421974				0.137083	0.00560246	0.0151141
0.1375	0.203923	0.198672			0.1375	0.0125985	0.0423849				0.1375	0.0056158	0.0145757
0.137917	0.203186	0.198672			0.137917	0.0124654	0.0424322				0.137917	0.00564861	0.0146372
0.138333	0.203522	0.199394			0.138333	0.0125125	0.0426933				0.138333	0.00568878	0.0145689
0.13875	0.203487	0.199406			0.13875	0.012434	0.0415199				0.13875	0.00561175	0.014794
0.139167	0.202379	0.196741			0.139167	0.0123866	0.0419503				0.139167	0.00566766	0.0145876
0.139583	0.202734	0.197744			0.139583	0.0125194	0.0418215				0.139583	0.00562751	0.0145711
0.14	0.203562	0.196801			0.14	0.0124251	0.0417264				0.14	0.005553	0.0144562
0.140417	0.204229	0.195215			0.140417	0.0124181	0.0409276				0.140417	0.00559298	0.0145318
0.140833	0.203015	0.197021			0.140833	0.0125936	0.0410489				0.140833	0.00558375	0.0145141
0.14125	0.203125	0.195426			0.14125	0.0125953	0.0414254				0.14125	0.00560018	0.0143743
0.141667	0.203565	0.195642			0.141667	0.0125481	0.0405354				0.141667	0.00562191	0.0143561
0.142083	0.204524	0.19584			0.142083	0.0125389	0.0404565				0.142083	0.00560945	0.0143661
0.1425	0.204218	0.196347			0.1425	0.0123912	0.0399223				0.1425	0.00560881	0.0143783
0.142917	0.203573	0.197079			0.142917	0.0125772	0.0405101				0.142917	0.00553904	0.0142772
0.143333	0.202766	0.196432			0.143333	0.0123877	0.0399057				0.143333	0.0056201	0.0143649
0.14375	0.202314	0.197258			0.14375	0.0124649	0.0388802				0.14375	0.00559929	0.0143555
0.144167	0.204745	0.196944			0.144167	0.0124627	0.0393668				0.144167	0.00555622	0.0142396
0.144583	0.202818	0.198066			0.144583	0.0125359	0.0399305				0.144583	0.00560981	0.0141675
0.145	0.20426	0.198426			0.145	0.0124886	0.0399848				0.145	0.00552772	0.0141574
0.145417	0.203556	0.19826			0.145417	0.0125877	0.0400351				0.145417	0.00563381	0.0141799
0.145833	0.202279	0.197381			0.145833	0.0124984	0.0387929				0.145833	0.00557508	0.0140796
0.14625	0.202714	0.197689			0.14625	0.0123649	0.0392466				0.14625	0.00561437	0.014063
0.146667	0.203902	0.197234			0.146667	0.0124334	0.0396725				0.146667	0.00561403	0.0140443
0.147083	0.201242	0.196143			0.147083	0.0124192	0.0398286				0.147083	0.00556031	0.0139804
0.1475	0.200221	0.196292			0.1475	0.0124613	0.0394165				0.1475	0.00559115	0.0141216
0.147917	0.20182	0.195205			0.147917	0.0125424	0.0395686				0.147917	0.00559811	0.0139127
0.148333	0.201519	0.197669			0.148333	0.0123995	0.0393901				0.148333	0.00556466	0.0140017
0.14875	0.203156	0.197509			0.14875	0.012455	0.0392033				0.14875	0.00559031	0.0140784
0.149167	0.202027	0.197716			0.149167	0.0124371	0.0388558				0.149167	0.00561553	0.0139618
0.149583	0.204492	0.196839			0.149583	0.0123877	0.0388642				0.149583	0.00562159	0.0140311
0.15	0.204909	0.198012			0.15	0.0124617	0.0385604				0.15	0.00557706	0.0139328
0.150417	0.203897	0.195131			0.150417	0.0123993	0.0381688				0.150417	0.00559992	0.013897
0.150833	0.203338	0.197392			0.150833	0.0123639	0.0383785				0.150833	0.00558385	0.0138376
0.15125	0.203281	0.199468			0.15125	0.0124191	0.0376776				0.15125	0.00558064	0.0138459
0.151667	0.203461	0.195533			0.151667	0.0124365	0.038344				0.151667	0.00559295	0.0137916
0.152083	0.204661	0.195195			0.152083	0.0124707	0.0375897				0.152083	0.00553432	0.0137501
0.1525	0.202706	0.196942			0.1525	0.0123772	0.0377267				0.1525	0.00557735	0.0137213
0.152917	0.202977	0.195556			0.152917	0.0123231	0.0378996				0.152917	0.00558951	0.0137521
0.153333	0.2032	0.196414			0.153333	0.0123446	0.0384787				0.153333	0.00556515	0.0137036
0.15375	0.202947	0.196612			0.15375	0.0123502	0.0376294				0.15375	0.00558262	0.0137051
0.154167	0.203025	0.195945			0.154167	0.0122378	0.0380144				0.154167	0.0055069	0.0137163
0.154583	0.20279	0.195386			0.154583	0.0124918	0.036911				0.154583	0.00549349	0.0136201
0.155	0.203435	0.194606			0.155	0.0122852	0.0374802				0.155	0.00563505	0.0136282
0.155417	0.201621	0.195805			0.155417	0.0123049	0.0379193				0.155417	0.0055546	0.013435
0.155833	0.203263	0.196346			0.155833	0.0123818	0.0375818				0.155833	0.00553574	0.0136121
0.15625	0.203519	0.196803			0.15625	0.0124133	0.0370613				0.15625	0.0055649	0.013584
0.156667	0.202594	0.196448			0.156667	0.0123567	0.0370842				0.156667	0.00553334	0.0137438
0.157083	0.202426	0.195363			0.157083	0.0123388	0.0360953				0.157083	0.00555871	0.0134348
0.1575	0.202916	0.194678			0.1575	0.012354	0.0369029				0.1575	0.00561024	0.0135876
0.157917	0.203378	0.195433			0.157917	0.0123831	0.0373647				0.157917	0.00554468	0.0133993
0.158333	0.202498	0.197725			0.158333	0.0123951	0.0366936				0.158333	0.00547532	0.0134618
0.15875	0.202297	0.196555			0.15875	0.0123543	0.0365432				0.15875	0.00554527	0.0132427
0.159167	0.203587	0.198742			0.159167	0.0123569	0.0362057				0.159167	0.00552605	0.013363
0.159583	0.20419	0.196796			0.159583	0.0121976	0.0360764				0.159583	0.00556137	0.013412
0.16	0.203796	0.19512			0.16	0.0122531	0.0357183				0.16	0.00552426	0.0132467
0.160417	0.203164	0.19516			0.160417	0.0122882	0.0357416				0.160417	0.00556162	0.013873
0.160833	0.202584	0.193488			0.160833	0.0123691	0.0356405				0.160833	0.00556524	0.0132128
0.16125	0.203149	0.196917			0.16125	0.012331	0.0353178				0.16125	0.00548589	0.0132484
0.161667	0.204072	0.194523			0.161667	0.0124213	0.0347381				0.161667	0.00559593	0.0132091
0.162083	0.202885	0.195966			0.162083	0.012417	0.0350087				0.162083	0.00545168	0.0132206
0.1625	0.201131	0.197432			0.1625	0.0122863	0.0365012				0.1625	0.00553743	0.0131927
0.162917	0.202681	0.196763			0.162917	0.012351	0.0351907				0.162917	0.00552093	0.0131062
0.163333	0.202889	0.196331			0.163333	0.0123228	0.0346064				0.163333	0.00546361	0.0131592
0.16375	0.202065	0.1959			0.16375	0.0124116	0.0339966				0.16375	0.00555901	0.013047
0.164167	0.203701	0.193891			0.164167	0.0123738	0.034362				0.164167	0.00549306	0.0130389
0.164583	0.202363	0.193629			0.164583	0.0122728	0.0347968				0.164583	0.00546148	0.0131595
0.165	0.202136	0.195522			0.165	0.0123406	0.0356047				0.165	0.00554906	0.0130397
0.165417	0.202915	0.194417			0.165417	0.0123021	0.0349108				0.165417	0.00554181	0.0129645
0.165833	0.203375	0.195054			0.165833	0.0121939	0.0341637				0.165833	0.00540299	0.0128907
0.16625	0.202626	0.196056			0.16625	0.012422	0.0336978				0.16625	0.00556138	0.0131868
0.166667	0.201762	0.197228			0.166667	0.01219	0.0343258				0.166667	0.00547374	0.0129653
0.167083	0.201386	0.19701			0.167083	0.0122854	0.0346843				0.167083	0.00555268	0.0130712
0.1675	0.202693	0.195991			0.1675	0.0122911	0.0345011				0.1675	0.00547959	0.0129147
0.167917	0.203192	0.197151			0.167917	0.0123111	0.0346534				0.167917	0.00554492	0.0127969
0.168333	0.201493	0.194782			0.168333	0.0122866	0.0341153				0.168333	0.00550032	0.0128661
0.16875	0.20473	0.194632			0.16875	0.0122481	0.0337453				0.16875	0.00552815	0.0127597
0.169167	0.202298	0.196747			0.169167	0.0122509	0.0336689				0.169167	0.00550706	0.0128271
0.169583	0.202811	0.195415			0.169583	0.0123925	0.0340662				0.169583	0.00551713	0.0127
0.17	0.20248	0.19558			0.17	0.012266	0.0342796				0.17	0.00547884	0.012726
0.170417	0.203423	0.195217			0.170417	0.0124176	0.0344553				0.170417	0.00552328	0.0126574
0.170833	0.20188	0.196078			0.170833	0.0122589	0.0342866				0.170833	0.00549702	0.0127198
0.17125	0.200423	0.194973			0.17125	0.012378	0.0342663				0.17125	0.00549734	0.0129996
0.171667	0.202032	0.196104			0.171667	0.0123092	0.0342474				0.171667	0.00540246	0.0124561
0.172083	0.201728	0.195611			0.172083	0.0122229	0.0339505				0.172083	0.00553003	0.0124046
0.1725	0.202162	0.195476			0.1725	0.0122491	0.0338955				0.1725	0.00547563	0.0125416
0.172917	0.202407	0.196213			0.172917	0.0122402	0.0337838				0.172917	0.00543325	0.0124831
0.173333	0.201028	0.195767			0.173333	0.0122157	0.0338193				0.173333	0.0054452	0.0125495
0.17375	0.202014	0.196409			0.17375	0.0121001	0.033621				0.17375	0.00546894	0.0125108
0.174167	0.202773	0.194483			0.174167	0.0122049	0.033454				0.174167	0.00545234	0.0124526
0.174583	0.202223	0.195178			0.174583	0.0122743	0.0324944				0.174583	0.00543765	0.0124403
0.175	0.202214	0.194287			0.175	0.0123445	0.0326814				0.175	0.00546066	0.0125027
0.175417	0.202928	0.195134			0.175417	0.012168	0.0328216				0.175417	0.00546006	0.0130142
0.175833	0.202421	0.197364			0.175833	0.0121881	0.0329211				0.175833	0.00548028	0.0123388
0.17625	0.202163	0.195188			0.17625	0.0123512	0.0328737				0.17625	0.00539277	0.012395
0.176667	0.20302	0.19505			0.176667	0.0122246	0.0328491				0.176667	0.00550095	0.0123807
0.177083	0.201584	0.193817			0.177083	0.0122748	0.0326661				0.177083	0.00546776	0.0123276
0.1775	0.201228	0.195605			0.1775	0.0122739	0.032501				0.1775	0.00544935	0.0123667
0.177917	0.201501	0.195915			0.177917	0.0123272	0.0322775				0.177917	0.00541013	0.0122862
0.178333	0.201494	0.194693			0.178333	0.0121101	0.032277				0.178333	0.0054684	0.0122134
0.17875	0.201872	0.196046			0.17875	0.0121751	0.0320077				0.17875	0.0053819	0.0123077
0.179167	0.200951	0.195986			0.179167	0.0123678	0.0323905				0.179167	0.00547006	0.0121732
0.179583	0.201111	0.194641			0.179583	0.0121506	0.0322645				0.179583	0.00543818	0.0122533
0.18	0.202974	0.194532			0.18	0.0122933	0.0318151				0.18	0.00539565	0.0122332
0.180417	0.202319	0.195063			0.180417	0.0124686	0.0320646				0.180417	0.00540442	0.0121751
0.180833	0.202759	0.197086			0.180833	0.0122106	0.0318409				0.180833	0.00543378	0.0121438
0.18125	0.203287	0.196365			0.18125	0.0123318	0.0316999				0.18125	0.00546377	0.0121719
0.181667	0.203841	0.194945			0.181667	0.0122642	0.0315099				0.181667	0.00543629	0.0120208
0.182083	0.201853	0.195948			0.182083	0.0122856	0.031241				0.182083	0.00540169	0.0122216
0.1825	0.20045	0.196059			0.1825	0.0121917	0.0309075				0.1825	0.00543572	0.0126771
0.182917	0.20114	0.192756			0.182917	0.0122406	0.0313018				0.182917	0.0054241	0.0120832
0.183333	0.20255	0.193085			0.183333	0.0120859	0.0312948				0.183333	0.00544312	0.0119838
0.18375	0.202646	0.19587			0.18375	0.0122629	0.0317461				0.18375	0.00541201	0.0120099
0.184167	0.20241	0.197297			0.184167	0.0123445	0.031189				0.184167	0.00543851	0.012036
0.184583	0.201515	0.195008			0.184583	0.0123091	0.031389				0.184583	0.00541801	0.0119261
0.185	0.202894	0.19621			0.185	0.0123002	0.0311373				0.185	0.00542472	0.0119627
0.185417	0.201886	0.195573			0.185417	0.0123643	0.0305184				0.185417	0.00546827	0.0119446
0.185833	0.20277	0.194527			0.185833	0.0121871	0.030479				0.185833	0.00537009	0.0119531
0.18625	0.201403	0.195529			0.18625	0.0122753	0.0301824				0.18625	0.00540531	0.0119794
0.186667	0.202253	0.196387			0.186667	0.0123328	0.0304913				0.186667	0.00534555	0.0119185
0.187083	0.20187	0.195722			0.187083	0.0122265	0.0299833				0.187083	0.00538756	0.0119379
0.1875	0.202919	0.194595			0.1875	0.0123083	0.0304812				0.1875	0.00539215	0.011803
0.187917	0.202405	0.196281			0.187917	0.0123892	0.0298451				0.187917	0.00539605	0.011802
0.188333	0.201632	0.196087			0.188333	0.0123032	0.0302572				0.188333	0.00541437	0.0117851
0.18875	0.201684	0.195578			0.18875	0.0123075	0.0303195				0.18875	0.00539484	0.0117576
0.189167	0.201322	0.197714			0.189167	0.0122958	0.0303349				0.189167	0.005338	0.011792
0.189583	0.202545	0.196127			0.189583	0.0123597	0.0301978				0.189583	0.00544495	0.0117007
0.19	0.202186	0.19521			0.19	0.0122316	0.0301332				0.19	0.00536497	0.0116716
0.190417	0.201566	0.194741			0.190417	0.0123008	0.0302397				0.190417	0.00543958	0.011747
0.190833	0.20189	0.194569			0.190833	0.0122095	0.0297226				0.190833	0.00543788	0.0117361
0.19125	0.201486	0.195323			0.19125	0.0123398	0.0296371				0.19125	0.0054149	0.0115539
0.191667	0.202396	0.193245			0.191667	0.0124761	0.0289449				0.191667	0.00537695	0.0119925
0.192083	0.201431	0.195221			0.192083	0.0125018	0.0293517				0.192083	0.00547128	0.0116681
0.1925	0.200845	0.194787			0.1925	0.0123235	0.0295577				0.1925	0.00532662	0.0115689
0.192917	0.204593	0.194434			0.192917	0.0125126	0.0290079				0.192917	0.0054454	0.0115299
0.193333	0.204794	0.192775			0.193333	0.0123649	0.0291183				0.193333	0.00538157	0.0116331
0.19375	0.202742	0.193434			0.19375	0.0122649	0.0292194				0.19375	0.00537838	0.0114639
0.194167	0.203496	0.194377			0.194167	0.0124212	0.0291062				0.194167	0.00537422	0.0114941
0.194583	0.203172	0.194698			0.194583	0.0125378	0.0292475				0.194583	0.00539699	0.0114892
0.195	0.201663	0.195844			0.195	0.0123841	0.0287387				0.195	0.00541786	0.0114302
0.195417	0.201072	0.195327			0.195417	0.0123153	0.0282777				0.195417	0.00537693	0.0114324
0.195833	0.200868	0.194204			0.195833	0.0122874	0.0284921				0.195833	0.00540564	0.0113916
0.19625	0.201614	0.193399			0.19625	0.0122501	0.0286358				0.19625	0.00537823	0.0113795
0.196667	0.201519	0.193629			0.196667	0.0123152	0.0285913				0.196667	0.00536163	0.0120925
0.197083	0.202936	0.194382			0.197083	0.0124874	0.0282747				0.197083	0.00539461	0.0113778
0.1975	0.203212	0.197591			0.1975	0.0124146	0.0284691				0.1975	0.00535076	0.0113029
0.197917	0.201979	0.196966			0.197917	0.0123907	0.0285061				0.197917	0.005328	0.0113783
0.198333	0.201909	0.195688			0.198333	0.0123886	0.0284538				0.198333	0.00543873	0.0113594
0.19875	0.201833	0.194285			0.19875	0.0122353	0.0286911				0.19875	0.0053561	0.0114037
0.199167	0.202808	0.196892			0.199167	0.0123281	0.0281871				0.199167	0.00533392	0.0113951
0.199583	0.202477	0.197032			0.199583	0.012432	0.0273268				0.199583	0.00536064	0.011154
0.2	0.201139	0.196957			0.2	0.0124059	0.0273456				0.2	0.00536217	0.0111597
0.200417	0.201702	0.197249			0.200417	0.0123534	0.0280358				0.200417	0.00533236	0.0114391
0.200833	0.202515	0.19524			0.200833	0.0124049	0.0279978				0.200833	0.00537809	0.0112064
0.20125	0.203307	0.193879			0.20125	0.0125313	0.0280135				0.20125	0.00528166	0.0111691
0.201667	0.202898	0.195464			0.201667	0.012525	0.0279585				0.201667	0.00532461	0.011101
0.202083	0.201428	0.195616			0.202083	0.0124217	0.0281645				0.202083	0.00538218	0.0113542
0.2025	0.202587	0.19546			0.2025	0.0123495	0.0282902				0.2025	0.00534809	0.0116995
0.202917	0.203116	0.19449			0.202917	0.0123648	0.0276536				0.202917	0.00537265	0.0109867
0.203333	0.203096	0.194167			0.203333	0.0125077	0.0278399				0.203333	0.00531607	0.0111874
0.20375	0.204341	0.19585			0.20375	0.0124379	0.0281058				0.20375	0.0053547	0.0111608
0.204167	0.204395	0.196182			0.204167	0.0124516	0.0279733				0.204167	0.00536752	0.0111177
0.204583	0.204078	0.196396			0.204583	0.0124829	0.0271654				0.204583	0.00532557	0.0111792
0.205	0.202336	0.195001			0.205	0.0125083	0.0275602				0.205	0.0053345	0.0112599
0.205417	0.203687	0.196794			0.205417	0.0125214	0.02762				0.205417	0.00535467	0.0110349
0.205833	0.20447	0.198268			0.205833	0.0126008	0.0273005				0.205833	0.0053322	0.0111033
0.20625	0.202322	0.19542			0.20625	0.0124773	0.0270885				0.20625	0.00531002	0.0110491
0.206667	0.203903	0.19443			0.206667	0.0125705	0.0269822				0.206667	0.00534193	0.0110358
0.207083	0.203867	0.194937			0.207083	0.0125181	0.0267444				0.207083	0.00533861	0.0110305
0.2075	0.203422	0.193752			0.2075	0.0124677	0.0269483				0.2075	0.00533224	0.0109343
0.207917	0.20285	0.193213			0.207917	0.0125602	0.0271533				0.207917	0.00530928	0.0109938
0.208333	0.203152	0.193864			0.208333	0.0124309	0.0272431				0.208333	0.00525319	0.0108887
0.20875	0.20241	0.195697			0.20875	0.0125757	0.0270323				0.20875	0.00534346	0.0108509
0.209167	0.202576	0.196273			0.209167	0.0125634	0.0267398				0.209167	0.00526189	0.0113476
0.209583	0.201762	0.19462			0.209583	0.0125052	0.0265314				0.209583	0.00536413	0.0108145
0.21	0.202832	0.196158			0.21	0.0126189	0.0271112				0.21	0.00528138	0.0109253
0.210417	0.203588	0.194973			0.210417	0.0125775	0.0265573				0.210417	0.00533318	0.0108724
0.210833	0.202627	0.194652			0.210833	0.0125773	0.0268				0.210833	0.00531726	0.0109877
0.21125	0.203414	0.195262			0.21125	0.012511	0.0269225				0.21125	0.0053311	0.0112079
0.211667	0.202409	0.194571			0.211667	0.0127482	0.0272019				0.211667	0.00529327	0.0110225
0.212083	0.201823	0.192459			0.212083	0.0125982	0.0269764				0.212083	0.00533592	0.0107105
0.2125	0.202567	0.197161			0.2125	0.0129187	0.0262897				0.2125	0.00531627	0.0107938
0.212917	0.202475	0.194972			0.212917	0.0125759	0.0266125				0.212917	0.0052978	0.0107931
0.213333	0.200973	0.195599			0.213333	0.0125924	0.0264782				0.213333	0.00531064	0.0112028
0.21375	0.201596	0.19602			0.21375	0.0127267	0.0268372				0.21375	0.00531226	0.0108198
0.214167	0.201929	0.196386			0.214167	0.0127208	0.0266129				0.214167	0.00525481	0.0108081
0.214583	0.202427	0.195293			0.214583	0.0125327	0.0265779				0.214583	0.00536465	0.0107657
0.215	0.202737	0.196876			0.215	0.012706	0.0265741				0.215	0.00531574	0.0107892
0.215417	0.201926	0.197251			0.215417	0.0126716	0.0264154				0.215417	0.00531073	0.0107237
0.215833	0.203046	0.195546			0.215833	0.0126393	0.0261802				0.215833	0.00531911	0.0107084
0.21625	0.202866	0.196647			0.21625	0.0126444	0.0263523				0.21625	0.00528762	0.0106433
0.216667	0.202399	0.197189			0.216667	0.0127919	0.0264282				0.216667	0.00531789	0.0106705
0.217083	0.202736	0.195471			0.217083	0.0127488	0.0253679				0.217083	0.00527914	0.0107262
0.2175	0.202506	0.197098			0.2175	0.0127565	0.0260106				0.2175	0.00525429	0.0105751
0.217917	0.203002	0.196775			0.217917	0.012722	0.0262114				0.217917	0.00532219	0.0106615
0.218333	0.201337	0.194608			0.218333	0.0126243	0.0261594				0.218333	0.00532945	0.0105326
0.21875	0.203076	0.195733			0.21875	0.0127539	0.0261239				0.21875	0.00524339	0.0105664
0.219167	0.204097	0.196704			0.219167	0.0126567	0.0257585				0.219167	0.00533629	0.010596
0.219583	0.203625	0.193705			0.219583	0.0128579	0.0256956				0.219583	0.00527626	0.0105302
0.22	0.205105	0.19303			0.22	0.0126497	0.0256824				0.22	0.00529136	0.0106162
0.220417	0.203941	0.194135			0.220417	0.0126855	0.0256838				0.220417	0.00526136	0.0104749
0.220833	0.203315	0.195876			0.220833	0.0127597	0.0259714				0.220833	0.00530709	0.0105375
0.22125	0.202971	0.195018			0.22125	0.0127141	0.0258268				0.22125	0.00531633	0.0103956
0.221667	0.203164	0.195049			0.221667	0.0128382	0.0254065				0.221667	0.00523162	0.010485
0.222083	0.202272	0.197271			0.222083	0.0129225	0.0256732				0.222083	0.00526637	0.0104448
0.2225	0.203095	0.19572			0.2225	0.0127936	0.0247245				0.2225	0.00530898	0.0104641
0.222917	0.2033	0.195939			0.222917	0.0128798	0.0252087				0.222917	0.00525836	0.010441
0.223333	0.202615	0.196201			0.223333	0.0127394	0.0251498				0.223333	0.00526987	0.0106298
0.22375	0.201551	0.195325			0.22375	0.0127596	0.0252702				0.22375	0.00532104	0.0104101
0.224167	0.20321	0.194408			0.224167	0.0127925	0.0251421				0.224167	0.00523767	0.0103627
0.224583	0.201624	0.194368			0.224583	0.0128974	0.0253697				0.224583	0.00526491	0.0102969
0.225	0.201519	0.194585			0.225	0.0129552	0.0249625				0.225	0.00528267	0.0103208
0.225417	0.203838	0.194599			0.225417	0.0128412	0.0249921				0.225417	0.00524722	0.0103638
0.225833	0.204332	0.194911			0.225833	0.0128809	0.0250067				0.225833	0.00524549	0.0103016
0.22625	0.203992	0.194791			0.22625	0.0130782	0.0251491				0.22625	0.00526338	0.0108764
0.226667	0.203739	0.194983			0.226667	0.0130383	0.0247994				0.226667	0.00521951	0.0102317
0.227083	0.203461	0.195641			0.227083	0.0129762	0.0249057				0.227083	0.00529485	0.0103048
0.2275	0.202831	0.196315			0.2275	0.0130966	0.0250391				0.2275	0.00530465	0.0103403
0.227917	0.204402	0.193342			0.227917	0.0130254	0.0253385				0.227917	0.00520983	0.0102996
0.228333	0.203714	0.193978			0.228333	0.0130778	0.0250101				0.228333	0.00521007	0.0101713
0.22875	0.203223	0.195068			0.22875	0.0130328	0.0252372				0.22875	0.00528406	0.010273
0.229167	0.203456	0.194892			0.229167	0.0129098	0.0246396				0.229167	0.00524422	0.0102357
0.229583	0.203533	0.195545			0.229583	0.0130478	0.0246996				0.229583	0.00527651	0.0101185
0.23	0.20312	0.195928			0.23	0.0128844	0.024746				0.23	0.00526692	0.0101444
0.230417	0.203567	0.196034			0.230417	0.0130896	0.0246967				0.230417	0.00527996	0.010252
0.230833	0.203648	0.19758			0.230833	0.0131201	0.0244825				0.230833	0.00522857	0.0101728
0.23125	0.203401	0.197752			0.23125	0.0129779	0.0244562				0.23125	0.00528059	0.0101744
0.231667	0.205372	0.196698			0.231667	0.0130862	0.024618				0.231667	0.0052377	0.0101487
0.232083	0.203321	0.195474			0.232083	0.0129574	0.0244878				0.232083	0.00526672	0.0102329
0.2325	0.202179	0.195476			0.2325	0.0130656	0.0243875				0.2325	0.00528868	0.0100213
0.232917	0.204716	0.193498			0.232917	0.0129992	0.0240632				0.232917	0.005255	0.0101533
0.233333	0.203959	0.194051			0.233333	0.0131199	0.0245378				0.233333	0.00527574	0.0100126
0.23375	0.203313	0.194426			0.23375	0.0132056	0.0241865				0.23375	0.00524503	0.0104198
0.234167	0.203508	0.195647			0.234167	0.0132181	0.0241028				0.234167	0.00525156	0.00984536
0.234583	0.203197	0.197622			0.234583	0.0131253	0.0240113				0.234583	0.00525784	0.00994344
0.235	0.202951	0.195777			0.235	0.013091	0.0242529				0.235	0.00516932	0.0108149
0.235417	0.202413	0.194889			0.235417	0.0130969	0.0240839				0.235417	0.00527834	0.00997811
0.235833	0.202981	0.194209			0.235833	0.0131825	0.0238278				0.235833	0.0051959	0.0100184
0.23625	0.204013	0.195207			0.23625	0.0132391	0.0240193				0.23625	0.00521653	0.0100757
0.236667	0.203179	0.196182			0.236667	0.0133059	0.0237546				0.236667	0.00524662	0.00994127
0.237083	0.203791	0.196328			0.237083	0.0133248	0.0232438				0.237083	0.0052146	0.00999828
0.2375	0.207091	0.196368			0.2375	0.0131173	0.0233463				0.2375	0.0052346	0.00998213
0.237917	0.206531	0.195304			0.237917	0.0133174	0.0237059				0.237917	0.00519356	0.00999286
0.238333	0.205152	0.196545			0.238333	0.0133456	0.0233414				0.238333	0.00521581	0.00989985
0.23875	0.204715	0.198105			0.23875	0.0131577	0.0234342				0.23875	0.00522824	0.00993565
0.239167	0.205128	0.194851			0.239167	0.013403	0.0235936				0.239167	0.00521613	0.00991876
0.239583	0.204855	0.194312			0.239583	0.0134033	0.0235765				0.239583	0.00523063	0.00991711
0.24	0.204646	0.195205			0.24	0.01334	0.0237818				0.24	0.00527717	0.00981561
0.240417	0.204566	0.19654			0.240417	0.013282	0.0234406				0.240417	0.00525733	0.00983972
0.240833	0.205217	0.196184			0.240833	0.013442	0.0235466				0.240833	0.00522232	0.00973417
0.24125	0.204538	0.195026			0.24125	0.0133488	0.0235585				0.24125	0.0051396	0.00983017
0.241667	0.205911	0.196344			0.241667	0.013451	0.0236098				0.241667	0.00528821	0.00977937
0.242083	0.204595	0.196163			0.242083	0.0133808	0.022928				0.242083	0.00519543	0.00976467
0.2425	0.205373	0.194519			0.2425	0.0135262	0.0231895				0.2425	0.00523137	0.00979811
0.242917	0.205361	0.194339			0.242917	0.0134242	0.0234481				0.242917	0.00515848	0.00970315
0.243333	0.204668	0.193583			0.243333	0.0134881	0.0232302				0.243333	0.00522997	0.00978713
0.24375	0.205867	0.194896			0.24375	0.0136474	0.0230904				0.24375	0.00519285	0.00974553
0.244167	0.205324	0.19508			0.244167	0.0134058	0.0231021				0.244167	0.00522296	0.00972572
0.244583	0.205336	0.19571			0.244583	0.0135106	0.0232113				0.244583	0.00522213	0.00977236
0.245	0.205135	0.195785			0.245	0.0136084	0.0224742				0.245	0.00520391	0.00980693
0.245417	0.205148	0.195774			0.245417	0.0136659	0.0231924				0.245417	0.00516408	0.00968211
0.245833	0.20346	0.19723			0.245833	0.0135623	0.022917				0.245833	0.00519755	0.00970306
0.24625	0.203517	0.195649			0.24625	0.0137656	0.0231016				0.24625	0.00524341	0.00968763
0.246667	0.204358	0.196323			0.246667	0.0135918	0.0229393				0.246667	0.00519007	0.00972653
0.247083	0.204554	0.197607			0.247083	0.0136673	0.0223553				0.247083	0.0052227	0.00967699
0.2475	0.204183	0.195227			0.2475	0.0135813	0.0220242				0.2475	0.00516918	0.00960651
0.247917	0.205128	0.195124			0.247917	0.013704	0.0224709				0.247917	0.00517428	0.00967405
0.248333	0.204065	0.197248			0.248333	0.013746	0.0227703				0.248333	0.00520467	0.00958527
0.24875	0.205029	0.195184			0.24875	0.0137886	0.0229637				0.24875	0.00515589	0.00954038
0.249167	0.205649	0.194701			0.249167	0.0138412	0.0228234				0.249167	0.0052135	0.00945721
0.249583	0.205737	0.195422			0.249583	0.0136793	0.0227762				0.249583	0.00521039	0.00955375
0.25	0.205035	0.195532			0.25	0.0139416	0.0228561				0.25	0.00520737	0.00955556
0.250417	0.205597	0.196276			0.250417	0.0137646	0.0226229				0.250417	0.00521293	0.00946554
0.250833	0.205283	0.195908			0.250833	0.0136855	0.0228073				0.250833	0.00520212	0.00952133
0.25125	0.204931	0.195987			0.25125	0.0139366	0.0228375				0.25125	0.00512952	0.00961946
0.251667	0.205127	0.195138			0.251667	0.0139344	0.0228996				0.251667	0.00522346	0.00950908
0.252083	0.206303	0.195161			0.252083	0.0137859	0.0224337				0.252083	0.00518638	0.00949928
0.2525	0.207027	0.19606			0.2525	0.0139248	0.0226714				0.2525	0.0051541	0.0096113
0.252917	0.206692	0.196733			0.252917	0.0138	0.022615				0.252917	0.00518216	0.00947297
0.253333	0.207074	0.195943			0.253333	0.0137083	0.0224314				0.253333	0.00515645	0.00960625
0.25375	0.206056	0.195569			0.25375	0.0138206	0.0225531				0.25375	0.00521134	0.00943921
0.254167	0.205618	0.196318			0.254167	0.0138571	0.0225296				0.254167	0.00518059	0.0094677
0.254583	0.20685	0.196539			0.254583	0.0140829	0.022555				0.254583	0.00513619	0.00944818
0.255	0.206454	0.194891			0.255	0.0140269	0.0223165				0.255	0.00518036	0.00936275
0.255417	0.206228	0.196175			0.255417	0.0139837	0.0223486				0.255417	0.00516631	0.00939848
0.255833	0.205619	0.195374			0.255833	0.0139727	0.0223737				0.255833	0.00511737	0.00944234
0.25625	0.205123	0.19674			0.25625	0.0141145	0.0222224				0.25625	0.00515538	0.00935684
0.256667	0.206775	0.195589			0.256667	0.0140446	0.0224586				0.256667	0.00513911	0.00937883
0.257083	0.206884	0.194932			0.257083	0.0139014	0.0220873				0.257083	0.00514074	0.00938836
0.2575	0.206322	0.196157			0.2575	0.0141368	0.02225				0.2575	0.00515629	0.00918124
0.257917	0.206779	0.19621			0.257917	0.0139804	0.0221939				0.257917	0.00512185	0.00925319
0.258333	0.207911	0.197243			0.258333	0.0141653	0.0222338				0.258333	0.00519114	0.00933343
0.25875	0.20844	0.197952			0.25875	0.0141805	0.0223645				0.25875	0.00509784	0.00928488
0.259167	0.20699	0.196121			0.259167	0.0142789	0.0221147				0.259167	0.00513527	0.00933273
0.259583	0.208087	0.19543			0.259583	0.0143226	0.0217304				0.259583	0.00507254	0.00922546
0.26	0.206761	0.194882			0.26	0.0141884	0.0215545				0.26	0.00519021	0.00923981
0.260417	0.205558	0.195476			0.260417	0.0143245	0.0218618				0.260417	0.00516387	0.00931771
0.260833	0.20783	0.19679			0.260833	0.0143395	0.0219419				0.260833	0.00513586	0.009266
0.26125	0.208335	0.19656			0.26125	0.014364	0.0218409				0.26125	0.00506919	0.0092889
0.261667	0.207798	0.196409			0.261667	0.0144775	0.0220106				0.261667	0.00520521	0.00975039
0.262083	0.206259	0.195536			0.262083	0.0143123	0.0215672				0.262083	0.00514375	0.00902754
0.2625	0.206776	0.197719			0.2625	0.014449	0.0215289				0.2625	0.00514933	0.00902861
0.262917	0.207076	0.197892			0.262917	0.0142201	0.021666				0.262917	0.00512556	0.00902422
0.263333	0.207324	0.197736			0.263333	0.0143161	0.0215032				0.263333	0.00514556	0.00908243
0.26375	0.208574	0.196006			0.26375	0.0144786	0.0214054				0.26375	0.00511758	0.00922642
0.264167	0.207777	0.196426			0.264167	0.0145109	0.0213763				0.264167	0.00520015	0.00923017
0.264583	0.2062	0.196842			0.264583	0.0146478	0.02167				0.264583	0.0050894	0.00939644
0.265	0.207885	0.196213			0.265	0.0144863	0.0218649				0.265	0.00516999	0.00905352
0.265417	0.208251	0.197949			0.265417	0.0144562	0.0214861				0.265417	0.00509705	0.009009
0.265833	0.208425	0.195042			0.265833	0.0144687	0.0215932				0.265833	0.00511355	0.0090482
0.26625	0.20844	0.195836			0.26625	0.0145699	0.0215864				0.26625	0.00515447	0.00902517
0.266667	0.208662	0.196035			0.266667	0.0145748	0.0217727				0.266667	0.00513991	0.00896122
0.267083	0.207888	0.196659			0.267083	0.0145636	0.0217016				0.267083	0.00513748	0.00910799
0.2675	0.20818	0.19631			0.2675	0.0146285	0.0215754				0.2675	0.00516465	0.00891415
0.267917	0.207991	0.197206			0.267917	0.0145477	0.021261				0.267917	0.00510586	0.00888198
0.268333	0.208095	0.197677			0.268333	0.0148084	0.0213194				0.268333	0.00516843	0.00903139
0.26875	0.208602	0.197802			0.26875	0.0148929	0.0220526				0.26875	0.00510135	0.00896525
0.269167	0.20896	0.196576			0.269167	0.0149408	0.0215425				0.269167	0.00515457	0.00891828
0.269583	0.208171	0.196702			0.269583	0.0146747	0.0212727				0.269583	0.00514962	0.00896224
0.27	0.207439	0.196063			0.27	0.0148059	0.0212396				0.27	0.00513187	0.00901196
0.270417	0.208454	0.196946			0.270417	0.0147172	0.0215639				0.270417	0.00513376	0.0088914
0.270833	0.207454	0.197338			0.270833	0.0148637	0.0214671				0.270833	0.0051102	0.00887878
0.27125	0.207623	0.197164			0.27125	0.0147386	0.0213235				0.27125	0.0050994	0.00888432
0.271667	0.209296	0.197445			0.271667	0.0148596	0.0213854				0.271667	0.005137	0.00887347
0.272083	0.210489	0.196171			0.272083	0.0149824	0.0214784				0.272083	0.00516868	0.00885493
0.2725	0.209784	0.196732			0.2725	0.0146909	0.0213312				0.2725	0.00517335	0.00883075
0.272917	0.208924	0.198052			0.272917	0.0149855	0.0215056				0.272917	0.0051424	0.00888611
0.273333	0.209979	0.1972			0.273333	0.0149852	0.0212442				0.273333	0.00513754	0.00942788
0.27375	0.208646	0.194631			0.27375	0.0149825	0.0209848				0.27375	0.00516718	0.00867637
0.274167	0.20976	0.197356			0.274167	0.0153002	0.0214727				0.274167	0.00511987	0.00879302
0.274583	0.209887	0.196934			0.274583	0.0149662	0.0211281				0.274583	0.00513876	0.00874874
0.275	0.209442	0.197554			0.275	0.0151636	0.0211074				0.275	0.00511533	0.00875641
0.275417	0.209421	0.197929			0.275417	0.0151006	0.0210496				0.275417	0.00510293	0.00880961
0.275833	0.210129	0.197493			0.275833	0.0152004	0.0211961				0.275833	0.00515935	0.00875586
0.27625	0.212907	0.197229			0.27625	0.0150895	0.021145				0.27625	0.00514133	0.00876303
0.276667	0.209582	0.197151			0.276667	0.0151671	0.0212293				0.276667	0.00514211	0.00867103
0.277083	0.211488	0.198322			0.277083	0.0151428	0.0212934				0.277083	0.00512582	0.00872168
0.2775	0.210759	0.196985			0.2775	0.0152647	0.0208189				0.2775	0.00512885	0.0087414
0.277917	0.211273	0.197034			0.277917	0.0153619	0.0210174				0.277917	0.0051314	0.00865119
0.278333	0.212027	0.195386			0.278333	0.0151774	0.0210333				0.278333	0.0051698	0.00864453
0.27875	0.211266	0.196653			0.27875	0.0151998	0.0209954				0.27875	0.00510598	0.00863769
0.279167	0.210577	0.19629			0.279167	0.0151721	0.0208385				0.279167	0.00519488	0.00865368
0.279583	0.210891	0.197959			0.279583	0.0153419	0.0212219				0.279583	0.00515796	0.00864572
0.28	0.211266	0.19832			0.28	0.0153828	0.021167				0.28	0.00511135	0.00862992
0.280417	0.211542	0.198222			0.280417	0.0153171	0.0210654				0.280417	0.00515137	0.00855618
0.280833	0.211644	0.197036			0.280833	0.0152732	0.0209637				0.280833	0.00511863	0.0085761
0.28125	0.211491	0.199022			0.28125	0.0154806	0.0206834				0.28125	0.00512943	0.00856833
0.281667	0.211397	0.198812			0.281667	0.0153672	0.0209008				0.281667	0.00517845	0.00854119
0.282083	0.211746	0.197066			0.282083	0.0155771	0.0203818				0.282083	0.00513774	0.00861881
0.2825	0.212591	0.196871			0.2825	0.0154317	0.0203996				0.2825	0.00512666	0.00914346
0.282917	0.212796	0.196966			0.282917	0.0155946	0.0205738				0.282917	0.00512512	0.0081989
0.283333	0.213284	0.197219			0.283333	0.0156047	0.0206979				0.283333	0.00511938	0.00892659
0.28375	0.211295	0.197125			0.28375	0.0156442	0.0205971				0.28375	0.0051678	0.00864721
0.284167	0.211003	0.198421			0.284167	0.0156149	0.0210644				0.284167	0.00513748	0.00859109
0.284583	0.210738	0.196718			0.284583	0.0156306	0.0204417				0.284583	0.00512229	0.00854338
0.285	0.210401	0.196247			0.285	0.0156542	0.0204746				0.285	0.00516428	0.00849811
0.285417	0.211804	0.197578			0.285417	0.0158671	0.0201119				0.285417	0.00515202	0.00850897
0.285833	0.211518	0.197016			0.285833	0.0158506	0.0200639				0.285833	0.00514765	0.00853786
0.28625	0.211528	0.198621			0.28625	0.0160067	0.0204473				0.28625	0.00513076	0.0085292
0.286667	0.212181	0.198631			0.286667	0.0156899	0.0204168				0.286667	0.00515662	0.00874491
0.287083	0.211489	0.196982			0.287083	0.015876	0.0203469				0.287083	0.00513848	0.00876003
0.2875	0.212252	0.196166			0.2875	0.0159494	0.0202713				0.2875	0.0051753	0.00811276
0.287917	0.212441	0.196535			0.287917	0.0158211	0.0204038				0.287917	0.00518454	0.0083855
0.288333	0.212557	0.197283			0.288333	0.0159747	0.0203927				0.288333	0.00513055	0.00901584
0.28875	0.213699	0.197704			0.28875	0.0159721	0.0201605				0.28875	0.00522246	0.00816337
0.289167	0.212835	0.197871			0.289167	0.0158801	0.0203071				0.289167	0.00514651	0.00828258
0.289583	0.212	0.198354			0.289583	0.0159903	0.0200012				0.289583	0.00516247	0.0083841
0.29	0.212818	0.196629			0.29	0.0161003	0.0202548				0.29	0.00513607	0.00833396
0.290417	0.212169	0.196575			0.290417	0.0162164	0.0201541				0.290417	0.00519802	0.00838356
0.290833	0.21272	0.198678			0.290833	0.0160416	0.0200287				0.290833	0.00516888	0.00846633
0.29125	0.213314	0.197667			0.29125	0.0162789	0.020117				0.29125	0.00509777	0.00844143
0.291667	0.212421	0.198753			0.291667	0.0163002	0.0200553				0.291667	0.00514555	0.00832363
0.292083	0.212036	0.199902			0.292083	0.0161181	0.0200171				0.292083	0.00519249	0.00840777
0.2925	0.213416	0.198961			0.2925	0.0161766	0.0198845				0.2925	0.00513405	0.0083068
0.292917	0.213693	0.198445			0.292917	0.0164487	0.0200888				0.292917	0.00518259	0.00879121
0.293333	0.21362	0.197995			0.293333	0.0162669	0.0198845				0.293333	0.0051256	0.00809515
0.29375	0.214012	0.198014			0.29375	0.0165288	0.0197134				0.29375	0.00516443	0.00809223
0.294167	0.214087	0.19826			0.294167	0.0164265	0.0198877				0.294167	0.00512011	0.00826547
0.294583	0.215088	0.198312			0.294583	0.0164343	0.0198003				0.294583	0.00518109	0.00856245
0.295	0.213951	0.199159			0.295	0.0165266	0.0198535				0.295	0.00513835	0.00858163
0.295417	0.213942	0.197753			0.295417	0.0164307	0.0197628				0.295417	0.00516996	0.00791752
0.295833	0.214239	0.198979			0.295833	0.0163625	0.0197323				0.295833	0.00522303	0.0081588
0.29625	0.215222	0.197996			0.29625	0.0164638	0.0189873				0.29625	0.00517252	0.00808893
0.296667	0.214099	0.199382			0.296667	0.0163722	0.0191821				0.296667	0.00519294	0.0087529
0.297083	0.214289	0.198224			0.297083	0.0165778	0.0196757				0.297083	0.0051335	0.00799233
0.2975	0.21402	0.19821			0.2975	0.0168499	0.0197202				0.2975	0.00517401	0.00808606
0.297917	0.213613	0.197995			0.297917	0.0167867	0.0198058				0.297917	0.00517427	0.00811161
0.298333	0.213623	0.198192			0.298333	0.0167118	0.0198844				0.298333	0.00516562	0.00809008
0.29875	0.214391	0.199155			0.29875	0.0166844	0.0197305				0.29875	0.005127	0.00820431
0.299167	0.213234	0.19814			0.299167	0.0169337	0.0196588				0.299167	0.00521138	0.00807564
0.299583	0.213436	0.196646			0.299583	0.0169904	0.0197896				0.299583	0.00514842	0.00808559
0.3	0.214128	0.196829			0.3	0.0167335	0.019745				0.3	0.00510697	0.00852911
0.300417	0.215115	0.198445			0.300417	0.016955	0.0195125				0.300417	0.00522706	0.00830537
0.300833	0.214249	0.198638			0.300833	0.0169722	0.019552				0.300833	0.00511963	0.00800343
0.30125	0.213315	0.198474			0.30125	0.0169108	0.0197844				0.30125	0.00516432	0.00817319
0.301667	0.215354	0.199195			0.301667	0.0171477	0.0195792				0.301667	0.00519918	0.00803468
0.302083	0.215134	0.198866			0.302083	0.0170783	0.0195126				0.302083	0.00519113	0.00807298
0.3025	0.214537	0.197794			0.3025	0.0171209	0.019271				0.3025	0.00519484	0.00804558
0.302917	0.216241	0.197894			0.302917	0.0171985	0.0192259				0.302917	0.00515825	0.00828163
0.303333	0.215855	0.198742			0.303333	0.0171186	0.0189796				0.303333	0.00519254	0.00790508
0.30375	0.214932	0.198985			0.30375	0.0171309	0.0193282				0.30375	0.00518805	0.00786972
0.304167	0.216103	0.198906			0.304167	0.01738	0.0191953				0.304167	0.00514269	0.00820777
0.304583	0.216515	0.199644			0.304583	0.0175218	0.0193797				0.304583	0.00518321	0.00778449
0.305	0.216674	0.196305			0.305	0.0174396	0.0193553				0.305	0.00518008	0.00794125
0.305417	0.216444	0.198928			0.305417	0.0173709	0.0194354				0.305417	0.00516891	0.00788762
0.305833	0.215452	0.198848			0.305833	0.0170854	0.0193145				0.305833	0.00515674	0.00787984
0.30625	0.215599	0.197177			0.30625	0.0174523	0.019377				0.30625	0.00515577	0.0079651
0.306667	0.215151	0.197544			0.306667	0.0176791	0.0193938				0.306667	0.0052242	0.00789213
0.307083	0.216358	0.198913			0.307083	0.0176633	0.0190407				0.307083	0.00517969	0.0084261
0.3075	0.214695	0.199158			0.3075	0.0176648	0.0191166				0.3075	0.00520079	0.00778515
0.307917	0.21601	0.198154			0.307917	0.0175287	0.0192453				0.307917	0.00520222	0.00774659
0.308333	0.216078	0.198482			0.308333	0.0178054	0.019275				0.308333	0.00523925	0.00779915
0.30875	0.216327	0.199548			0.30875	0.0179051	0.0191402				0.30875	0.00516984	0.00810349
0.309167	0.217131	0.198803			0.309167	0.0177509	0.0191497				0.309167	0.00520116	0.007828
0.309583	0.217123	0.200019			0.309583	0.0176903	0.0191979				0.309583	0.00522237	0.00783493
0.31	0.216766	0.199917			0.31	0.01796	0.0190059				0.31	0.00513743	0.00785187
0.310417	0.216025	0.199893			0.310417	0.0179599	0.0191669				0.310417	0.00522158	0.00781035
0.310833	0.217531	0.198986			0.310833	0.0181372	0.0189979				0.310833	0.00518683	0.00779263
0.31125	0.217063	0.200025			0.31125	0.0179685	0.0191181				0.31125	0.00522689	0.00781413
0.311667	0.21567	0.198651			0.311667	0.0180581	0.0191799				0.311667	0.00520301	0.00776024
0.312083	0.217186	0.199667			0.312083	0.0180952	0.018695				0.312083	0.00526204	0.00775971
0.3125	0.217718	0.200223			0.3125	0.0180486	0.0191188				0.3125	0.00518797	0.00834275
0.312917	0.217291	0.19941			0.312917	0.0181786	0.0188459				0.312917	0.00521687	0.0076917
0.313333	0.217663	0.198157			0.313333	0.0181812	0.019021				0.313333	0.00527658	0.00763969
0.31375	0.219283	0.199173			0.31375	0.0183335	0.019051				0.31375	0.00522304	0.00769325
0.314167	0.219782	0.199897			0.314167	0.0182684	0.0185608				0.314167	0.00522939	0.00799858
0.314583	0.218887	0.20017			0.314583	0.0184549	0.0186854				0.314583	0.0052612	0.00821885
0.315	0.219413	0.200531			0.315	0.0182059	0.0186883				0.315	0.00524065	0.00782038
0.315417	0.220908	0.200135			0.315417	0.018431	0.0186667				0.315417	0.00520037	0.00752503
0.315833	0.21999	0.199468			0.315833	0.018536	0.0186847				0.315833	0.00526299	0.00762773
0.31625	0.220264	0.198862			0.31625	0.0185848	0.0188063				0.31625	0.00519831	0.00763216
0.316667	0.219272	0.19914			0.316667	0.0184807	0.0187973				0.316667	0.00521269	0.00800299
0.317083	0.219533	0.199989			0.317083	0.0186607	0.0187949				0.317083	0.00524883	0.0076607
0.3175	0.219217	0.199693			0.3175	0.0186213	0.0187295				0.3175	0.00523962	0.0078593
0.317917	0.219327	0.200338			0.317917	0.0189121	0.0186981				0.317917	0.00525319	0.00764539
0.318333	0.21927	0.201085			0.318333	0.0190127	0.018616				0.318333	0.00522002	0.00764639
0.31875	0.218386	0.200605			0.31875	0.0188259	0.0188034				0.31875	0.00528217	0.00803893
0.319167	0.219171	0.199605			0.319167	0.0185825	0.0185709				0.319167	0.00523863	0.00794584
0.319583	0.219613	0.19935			0.319583	0.0188866	0.0185397				0.319583	0.00527545	0.00744269
0.32	0.219317	0.199049			0.32	0.0190779	0.0187624				0.32	0.00528339	0.00743467
0.320417	0.219208	0.199529			0.320417	0.0190828	0.0186155				0.320417	0.00526296	0.0075987
0.320833	0.219995	0.199747			0.320833	0.0192003	0.0186894				0.320833	0.00523861	0.00761904
0.32125	0.219385	0.199959			0.32125	0.0191574	0.0186002				0.32125	0.00527032	0.00758102
0.321667	0.220346	0.200057			0.321667	0.018899	0.0184251				0.321667	0.00525215	0.00764023
0.322083	0.219207	0.200312			0.322083	0.0191735	0.0186123				0.322083	0.00523276	0.0076212
0.3225	0.219897	0.19922			0.3225	0.019037	0.0186813				0.3225	0.00526663	0.00811515
0.322917	0.220473	0.199253			0.322917	0.019155	0.0185406				0.322917	0.0052644	0.00737761
0.323333	0.220024	0.200543			0.323333	0.0191462	0.018313				0.323333	0.00526309	0.00746851
0.32375	0.220351	0.199149			0.32375	0.0194142	0.0184746				0.32375	0.00527562	0.00796242
0.324167	0.220251	0.199162			0.324167	0.0194456	0.0185609				0.324167	0.00522271	0.00728504
0.324583	0.22061	0.200295			0.324583	0.0192221	0.0184199				0.324583	0.00527499	0.00741985
0.325	0.220653	0.198216			0.325	0.019478	0.0183438				0.325	0.00528232	0.0075531
0.325417	0.221378	0.198046			0.325417	0.0195613	0.0185032				0.325417	0.00530148	0.00747015
0.325833	0.221519	0.199249			0.325833	0.0197991	0.0184045				0.325833	0.00532365	0.00745397
0.32625	0.22047	0.199309			0.32625	0.0195599	0.0181283				0.32625	0.00527602	0.00747086
0.326667	0.221559	0.199111			0.326667	0.0194749	0.0179474				0.326667	0.0052695	0.00797868
0.327083	0.221383	0.200621			0.327083	0.0199231	0.0182626				0.327083	0.0052887	0.00726313
0.3275	0.22128	0.200908			0.3275	0.019857	0.0186187				0.3275	0.00529189	0.00733586
0.327917	0.220861	0.20002			0.327917	0.0198497	0.0187883				0.327917	0.00529829	0.0074443
0.328333	0.221936	0.200437			0.328333	0.0198781	0.0187552				0.328333	0.00529252	0.00746895
0.32875	0.222358	0.201507			0.32875	0.0203285	0.0185477				0.32875	0.00528977	0.00740885
0.329167	0.221671	0.20035			0.329167	0.0201346	0.0185164				0.329167	0.0053248	0.00747592
0.329583	0.222342	0.199365			0.329583	0.0201765	0.0184611				0.329583	0.00530367	0.00737223
0.33	0.220966	0.199575			0.33	0.0201765	0.0184633				0.33	0.00535669	0.00739625
0.330417	0.220778	0.199902			0.330417	0.0202147	0.0184893				0.330417	0.00533075	0.00741049
0.330833	0.220734	0.200556			0.330833	0.0203323	0.0182524				0.330833	0.00530852	0.00787457
0.33125	0.220887	0.199511			0.33125	0.020006	0.0183749				0.33125	0.00534691	0.0072691
0.331667	0.22083	0.199591			0.331667	0.0203251	0.0182707				0.331667	0.0053388	0.00725608
0.332083	0.221405	0.200405			0.332083	0.0205212	0.018242				0.332083	0.0053365	0.00723929
0.3325	0.221481	0.199643			0.3325	0.0201292	0.0181482				0.3325	0.00536489	0.00730667
0.332917	0.221941	0.200009			0.332917	0.0204331	0.0179758				0.332917	0.00534946	0.00727673
0.333333	0.22169	0.201333			0.333333	0.0205518	0.0179717				0.333333	0.00535342	0.00737202
0.33375	0.222464	0.200525			0.33375	0.0206464	0.0181988				0.33375	0.00537569	0.00731836
0.334167	0.222349	0.200864			0.334167	0.0209496	0.0180708				0.334167	0.00532006	0.00730143
0.334583	0.222114	0.200658			0.334583	0.0209498	0.0181214				0.334583	0.0052927	0.00783574
0.335	0.221802	0.198809			0.335	0.0206643	0.0181144				0.335	0.00540124	0.00723744
0.335417	0.221761	0.200659			0.335417	0.0208912	0.0179397				0.335417	0.00529237	0.00717292
0.335833	0.222852	0.201263			0.335833	0.0211587	0.0178246				0.335833	0.00543239	0.00721384
0.33625	0.222159	0.201485			0.33625	0.0207953	0.0177849				0.33625	0.00543266	0.00720788
0.336667	0.22271	0.199971			0.336667	0.0210948	0.0177915				0.336667	0.0053778	0.0071986
0.337083	0.22285	0.19957			0.337083	0.0213396	0.0179141				0.337083	0.00537965	0.00727615
0.3375	0.222434	0.199406			0.3375	0.0211903	0.01784				0.3375	0.00541286	0.00737242
0.337917	0.221998	0.199875			0.337917	0.0211534	0.0178359				0.337917	0.00535286	0.00732946
0.338333	0.221748	0.201185			0.338333	0.0211964	0.0177887				0.338333	0.00540487	0.00720995
0.33875	0.222036	0.200388			0.33875	0.0211749	0.0178499				0.33875	0.0054448	0.00766676
0.339167	0.222332	0.200913			0.339167	0.0211404	0.0178701				0.339167	0.00537998	0.00713441
0.339583	0.223689	0.2019			0.339583	0.0215222	0.0178959				0.339583	0.00537409	0.00714686
0.34	0.223277	0.202181			0.34	0.0217558	0.0176498				0.34	0.00548058	0.00700496
0.340417	0.223254	0.201184			0.340417	0.021852	0.0175676				0.340417	0.00541586	0.00715769
0.340833	0.22301	0.199575			0.340833	0.0216823	0.0177535				0.340833	0.00542868	0.00711948
0.34125	0.223968	0.200503			0.34125	0.0217031	0.0175438				0.34125	0.00541788	0.00717383
0.341667	0.222385	0.19908			0.341667	0.0217798	0.0173436				0.341667	0.00545231	0.00709733
0.342083	0.22354	0.200926			0.342083	0.0218402	0.0175065				0.342083	0.00543312	0.00774733
0.3425	0.223471	0.200438			0.3425	0.0219796	0.017119				0.3425	0.00548881	0.00707153
0.342917	0.224254	0.200676			0.342917	0.0219027	0.0170973				0.342917	0.00540931	0.00705425
0.343333	0.223888	0.201044			0.343333	0.022087	0.0173952				0.343333	0.00547312	0.00702171
0.34375	0.22455	0.201826			0.34375	0.022052	0.0173286				0.34375	0.00546715	0.00703909
0.344167	0.224302	0.201368			0.344167	0.0220859	0.0173092				0.344167	0.0054456	0.00707398
0.344583	0.224903	0.201577			0.344583	0.0222532	0.0173641				0.344583	0.00550008	0.00713039
0.345	0.22504	0.199934			0.345	0.0223963	0.017418				0.345	0.0054092	0.00708538
0.345417	0.224648	0.200913			0.345417	0.0222875	0.0174163				0.345417	0.00545014	0.00726153
0.345833	0.225264	0.199981			0.345833	0.0225027	0.0174717				0.345833	0.00551686	0.00684224
0.34625	0.224648	0.200401			0.34625	0.0225084	0.0174405				0.34625	0.0054233	0.00725964
0.346667	0.22374	0.200182			0.346667	0.0226974	0.0173784				0.346667	0.00550411	0.00700856
0.347083	0.224234	0.200165			0.347083	0.0224821	0.0173135				0.347083	0.00549194	0.00745002
0.3475	0.225452	0.200333			0.3475	0.0228134	0.017381				0.3475	0.00544675	0.00703246
0.347917	0.224988	0.199873			0.347917	0.0227589	0.0173508				0.347917	0.00555929	0.00694288
0.348333	0.225855	0.19996			0.348333	0.0229087	0.0173951				0.348333	0.00547174	0.00690319
0.34875	0.226792	0.201581			0.34875	0.0230447	0.0173751				0.34875	0.00551055	0.0070334
0.349167	0.22713	0.200469			0.349167	0.0231174	0.017322				0.349167	0.00554766	0.00700165
0.349583	0.226471	0.19955			0.349583	0.0232955	0.0173821				0.349583	0.00548419	0.00703103
0.35	0.225137	0.199931			0.35	0.023305	0.0174004				0.35	0.00556199	0.00692891
0.350417	0.225342	0.200207			0.350417	0.0233045	0.0173093				0.350417	0.00548651	0.00732801
0.350833	0.225267	0.199302			0.350833	0.0231842	0.0173179				0.350833	0.00560828	0.00691588
0.35125	0.225204	0.19947			0.35125	0.0231591	0.0173433				0.35125	0.00547819	0.00751684
0.351667	0.225122	0.200747			0.351667	0.0234346	0.0172333				0.351667	0.00552927	0.00671024
0.352083	0.226438	0.201237			0.352083	0.0234127	0.0172445				0.352083	0.00557157	0.00703507
0.3525	0.226807	0.201077			0.3525	0.0234147	0.0171911				0.3525	0.0055518	0.00696448
0.352917	0.225548	0.200094			0.352917	0.0239137	0.017007				0.352917	0.0056049	0.00679929
0.353333	0.22621	0.20092			0.353333	0.0233748	0.0171017				0.353333	0.00553169	0.00688312
0.35375	0.226387	0.203324			0.35375	0.0234719	0.016977				0.35375	0.00561195	0.00697642
0.354167	0.226993	0.200731			0.354167	0.0240343	0.0163999				0.354167	0.00556309	0.00711283
0.354583	0.227368	0.201141			0.354583	0.0238159	0.016503				0.354583	0.00560799	0.00706994
0.355	0.226914	0.202192			0.355	0.0241182	0.0171017				0.355	0.00554172	0.00676163
0.355417	0.226717	0.201608			0.355417	0.0240564	0.0170295				0.355417	0.00561188	0.00685689
0.355833	0.225267	0.200955			0.355833	0.0237043	0.0169864				0.355833	0.00561632	0.0068928
0.35625	0.224468	0.200577			0.35625	0.024194	0.016803				0.35625	0.00554978	0.00679489
0.356667	0.225802	0.200011			0.356667	0.0247011	0.01675				0.356667	0.00567147	0.00686379
0.357083	0.226266	0.200001			0.357083	0.0243907	0.0170443				0.357083	0.00558709	0.00691415
0.3575	0.226469	0.200148			0.3575	0.0243836	0.0170782				0.3575	0.00569436	0.00682673
0.357917	0.226391	0.199202			0.357917	0.0247519	0.0170907				0.357917	0.00565775	0.00686717
0.358333	0.226948	0.201215			0.358333	0.0250269	0.0170508				0.358333	0.00565283	0.00675667
0.35875	0.226359	0.202304			0.35875	0.0248374	0.01699				0.35875	0.00571391	0.0067895
0.359167	0.226629	0.20144			0.359167	0.0248781	0.0170801				0.359167	0.00567876	0.00682159
0.359583	0.226937	0.20067			0.359583	0.024793	0.0171647				0.359583	0.00564363	0.00734326
0.36	0.22691	0.200494			0.36	0.0249149	0.0170549				0.36	0.00568521	0.00703694
0.360417	0.227616	0.201548			0.360417	0.0250206	0.0170359				0.360417	0.00565917	0.00660681
0.360833	0.227843	0.201555			0.360833	0.0251491	0.0170081				0.360833	0.00569878	0.00664334
0.36125	0.227842	0.200574			0.36125	0.0252033	0.0170455				0.36125	0.00562253	0.00673583
0.361667	0.227587	0.201107			0.361667	0.0249282	0.0168599				0.361667	0.00579394	0.00673485
0.362083	0.228531	0.200395			0.362083	0.0251676	0.016589				0.362083	0.00571643	0.00678039
0.3625	0.227374	0.199828			0.3625	0.0252504	0.0169135				0.3625	0.00565102	0.00690307
0.362917	0.227006	0.200758			0.362917	0.025546	0.0169682				0.362917	0.00576139	0.0069082
0.363333	0.226272	0.200231			0.363333	0.0254785	0.0169336				0.363333	0.00565999	0.0070729
0.36375	0.227099	0.20163			0.36375	0.0260066	0.0168093				0.36375	0.00576044	0.00658661
0.364167	0.226964	0.199443			0.364167	0.0256333	0.016841				0.364167	0.00569943	0.00663123
0.364583	0.227451	0.200344			0.364583	0.0258989	0.0169493				0.364583	0.00572578	0.00697667
0.365	0.227085	0.199614			0.365	0.0261175	0.0169389				0.365	0.00574881	0.00655503
0.365417	0.227542	0.199603			0.365417	0.0261962	0.0169162				0.365417	0.00569625	0.00665001
0.365833	0.228581	0.199401			0.365833	0.0259635	0.0168017				0.365833	0.00572398	0.00673796
0.36625	0.228484	0.199938			0.36625	0.0258689	0.016855				0.36625	0.00570082	0.00663184
0.366667	0.228232	0.200007			0.366667	0.0259427	0.0168409				0.366667	0.0057255	0.00696563
0.367083	0.227392	0.200264			0.367083	0.0258235	0.0167467				0.367083	0.00574573	0.00657686
0.3675	0.227231	0.200784			0.3675	0.0261759	0.0166755				0.3675	0.00573085	0.0070431
0.367917	0.230993	0.200832			0.367917	0.025991	0.0166814				0.367917	0.00578583	0.00644863
0.368333	0.229275	0.200574			0.368333	0.0263713	0.0167921				0.368333	0.00578178	0.00667751
0.36875	0.229111	0.199394			0.36875	0.026457	0.0167872				0.36875	0.00577155	0.00662615
0.369167	0.228858	0.19962			0.369167	0.026813	0.0167484				0.369167	0.00567914	0.00664885
0.369583	0.228535	0.20095			0.369583	0.0269552	0.0166991				0.369583	0.00577173	0.00667571
0.37	0.229108	0.200716			0.37	0.0266741	0.016803				0.37	0.00573704	0.00652713
0.370417	0.229725	0.200658			0.370417	0.0267961	0.0167804				0.370417	0.00581041	0.00679531
0.370833	0.229746	0.20127			0.370833	0.0271773	0.0167909				0.370833	0.00577703	0.00649083
0.37125	0.229256	0.201824			0.37125	0.0271411	0.0167762				0.37125	0.00569533	0.00730261
0.371667	0.229328	0.201487			0.371667	0.0270563	0.0166495				0.371667	0.0058008	0.00639652
0.372083	0.228927	0.201284			0.372083	0.0272914	0.0165958				0.372083	0.00577395	0.00649486
0.3725	0.229478	0.201749			0.3725	0.0272898	0.0166616				0.3725	0.005771	0.00653872
0.372917	0.22885	0.200405			0.372917	0.0274847	0.0167473				0.372917	0.00579279	0.00659682
0.373333	0.229734	0.200534			0.373333	0.0278004	0.0166855				0.373333	0.00572253	0.00653688
0.37375	0.229513	0.2006			0.37375	0.0276539	0.0166925				0.37375	0.00572728	0.00657078
0.374167	0.22885	0.201399			0.374167	0.0279392	0.0166486				0.374167	0.00577936	0.00729694
0.374583	0.229695	0.20071			0.374583	0.0279228	0.0166433				0.374583	0.00576012	0.00627494
0.375	0.229327	0.200408			0.375	0.0276997	0.0165566				0.375	0.00573826	0.00662491
0.375417	0.229833	0.201594			0.375417	0.0278393	0.0165595				0.375417	0.00579302	0.00646208
0.375833	0.230254	0.200611			0.375833	0.0281902	0.0165901				0.375833	0.00577405	0.00664297
0.37625	0.229155	0.199922			0.37625	0.0284231	0.0165951				0.37625	0.0056942	0.00643402
0.376667	0.228345	0.199862			0.376667	0.0285042	0.0165827				0.376667	0.00576221	0.00646027
0.377083	0.229217	0.199487			0.377083	0.0283409	0.0165891				0.377083	0.00579156	0.00655232
0.3775	0.23012	0.200103			0.3775	0.0286615	0.0164911				0.3775	0.00577453	0.00697103
0.377917	0.230689	0.201297			0.377917	0.0284479	0.0165174				0.377917	0.00580659	0.00655067
0.378333	0.230553	0.201806			0.378333	0.028498	0.0164656				0.378333	0.00578788	0.00626321
0.37875	0.230606	0.201598			0.37875	0.0288659	0.0165434				0.37875	0.00574308	0.00654546
0.379167	0.230004	0.201366			0.379167	0.0287295	0.0164467				0.379167	0.00582326	0.00648676
0.379583	0.230753	0.200941			0.379583	0.0289174	0.0165029				0.379583	0.00573788	0.00654682
0.38	0.232014	0.201596			0.38	0.0290977	0.0164587				0.38	0.00574877	0.0063773
0.380417	0.231651	0.201273			0.380417	0.0291899	0.0164193				0.380417	0.00583968	0.0064786
0.380833	0.231207	0.20201			0.380833	0.0287928	0.016413				0.380833	0.00580495	0.00647052
0.38125	0.231614	0.201159			0.38125	0.0293395	0.0163727				0.38125	0.00579287	0.00644851
0.381667	0.231473	0.199368			0.381667	0.0294824	0.016338				0.381667	0.00578359	0.0068759
0.382083	0.230571	0.200486			0.382083	0.0296892	0.0163767				0.382083	0.00570132	0.00631461
0.3825	0.231094	0.200355			0.3825	0.0299746	0.0163186				0.3825	0.00580685	0.00636758
0.382917	0.23105	0.200848			0.382917	0.0296216	0.0163571				0.382917	0.00576103	0.00642933
0.383333	0.232232	0.200941			0.383333	0.0300894	0.0162011				0.383333	0.00579575	0.00640483
0.38375	0.232621	0.202573			0.38375	0.030038	0.0162792				0.38375	0.00577753	0.00641239
0.384167	0.232721	0.201605			0.384167	0.0300871	0.0163523				0.384167	0.00576192	0.00637313
0.384583	0.231825	0.201457			0.384583	0.0302253	0.0162872				0.384583	0.0057241	0.00639864
0.385	0.232796	0.201049			0.385	0.0298161	0.0163474				0.385	0.00581413	0.00640137
0.385417	0.232582	0.20077			0.385417	0.0305643	0.0161849				0.385417	0.00574385	0.00636508
0.385833	0.2321	0.200469			0.385833	0.0305078	0.0162489				0.385833	0.00578078	0.0063997
0.38625	0.232206	0.199657			0.38625	0.0305583	0.0162711				0.38625	0.00582141	0.00693085
0.386667	0.232381	0.200049			0.386667	0.0305744	0.016313				0.386667	0.00569265	0.00625478
0.387083	0.233079	0.200954			0.387083	0.0303232	0.0162393				0.387083	0.0057751	0.00620318
0.3875	0.233645	0.200495			0.3875	0.0310393	0.0161648				0.3875	0.00579101	0.00637494
0.387917	0.232543	0.200313			0.387917	0.0311506	0.0162357				0.387917	0.0057499	0.00632936
0.388333	0.232491	0.199924			0.388333	0.0310081	0.01624				0.388333	0.00572941	0.0064431
0.38875	0.232505	0.200959			0.38875	0.031499	0.0161436				0.38875	0.00581504	0.00632209
0.389167	0.233612	0.199522			0.389167	0.0311551	0.0161647				0.389167	0.00574395	0.00637687
0.389583	0.233283	0.198869			0.389583	0.0310987	0.0161644				0.389583	0.00577737	0.00629255
0.39	0.233411	0.199094			0.39	0.0314037	0.0162176				0.39	0.00574392	0.00681313
0.390417	0.23335	0.200397			0.390417	0.0317014	0.0161098				0.390417	0.00582477	0.00619984
0.390833	0.233051	0.200352			0.390833	0.0317326	0.0160026				0.390833	0.00577678	0.00619122
0.39125	0.232359	0.200772			0.39125	0.0318523	0.0160389				0.39125	0.00580461	0.00622447
0.391667	0.233278	0.201265			0.391667	0.0324448	0.0160101				0.391667	0.00573746	0.00621645
0.392083	0.23318	0.200749			0.392083	0.0320377	0.0160392				0.392083	0.00577323	0.00631944
0.3925	0.233178	0.199513			0.3925	0.0320249	0.016019				0.3925	0.00574676	0.00629565
0.392917	0.233877	0.200251			0.392917	0.0327952	0.0160926				0.392917	0.00578235	0.00628972
0.393333	0.232742	0.20016			0.393333	0.0323766	0.0159585				0.393333	0.00578935	0.00628663
0.39375	0.232875	0.20049			0.39375	0.0330872	0.0159515				0.39375	0.00568179	0.0068422
0.394167	0.234312	0.200258			0.394167	0.0331117	0.0159093				0.394167	0.0057801	0.00604359
0.394583	0.233793	0.201535			0.394583	0.0331102	0.015879				0.394583	0.00580425	0.00641666
0.395	0.233801	0.201235			0.395	0.0333254	0.0158965				0.395	0.00579857	0.00605504
0.395417	0.233591	0.199855			0.395417	0.0329914	0.0159613				0.395417	0.00575542	0.00617317
0.395833	0.234088	0.200678			0.395833	0.0330911	0.0157942				0.395833	0.00571509	0.00632044
0.39625	0.233584	0.200335			0.39625	0.033801	0.0158893				0.39625	0.00589338	0.00618415
0.396667	0.23364	0.201996			0.396667	0.0333697	0.0159623				0.396667	0.00574233	0.00618181
0.397083	0.233515	0.201151			0.397083	0.0334036	0.0159952				0.397083	0.00576163	0.00622077
0.3975	0.233492	0.201397			0.3975	0.0334635	0.0158078				0.3975	0.00568771	0.00679839
0.397917	0.232622	0.202741			0.397917	0.0340694	0.0159287				0.397917	0.00575642	0.00583891
0.398333	0.233131	0.202702			0.398333	0.0344496	0.0159127				0.398333	0.00576119	0.00615968
0.39875	0.232957	0.200847			0.39875	0.0340131	0.0158576				0.39875	0.00570804	0.00620657
0.399167	0.233225	0.201812			0.399167	0.033929	0.0157508				0.399167	0.00574657	0.00651477
0.399583	0.232956	0.201699			0.399583	0.0344778	0.0156654				0.399583	0.00576957	0.0064649
0.4	0.233439	0.202397			0.4	0.0345847	0.0156808				0.4	0.00573606	0.00629282
0.400417	0.234351	0.202689			0.400417	0.0344923	0.0157383				0.400417	0.00575713	0.00590499
0.400833	0.234073	0.201981			0.400833	0.0344813	0.0157513				0.400833	0.00580249	0.0060207
0.40125	0.234355	0.201223			0.40125	0.0346453	0.0157555				0.40125	0.00573718	0.00608992
0.401667	0.234701	0.200597			0.401667	0.0348546	0.0157667				0.401667	0.0057583	0.00616477
0.402083	0.235282	0.201655			0.402083	0.0352735	0.0158494				0.402083	0.00581562	0.0061738
0.4025	0.234086	0.201046			0.4025	0.0349181	0.0158216				0.4025	0.00574717	0.00614116
0.402917	0.234872	0.200848			0.402917	0.0350168	0.0157982				0.402917	0.00570581	0.00659218
0.403333	0.235524	0.20217			0.403333	0.035603	0.0157346				0.403333	0.00573539	0.0058522
0.40375	0.234801	0.202231			0.40375	0.0350653	0.0156086				0.40375	0.00570578	0.00607127
0.404167	0.23511	0.202484			0.404167	0.0356526	0.0156116				0.404167	0.00579423	0.00612859
0.404583	0.235532	0.201704			0.404583	0.0357185	0.0156454				0.404583	0.0057609	0.00615068
0.405	0.234969	0.200751			0.405	0.0353965	0.0156216				0.405	0.00573436	0.00641544
0.405417	0.23529	0.200519			0.405417	0.0359836	0.0155954				0.405417	0.00573485	0.00597592
0.405833	0.23645	0.200718			0.405833	0.0366584	0.0156147				0.405833	0.00576576	0.00606294
0.40625	0.235519	0.201995			0.40625	0.0362049	0.0156927				0.40625	0.00577155	0.00669839
0.406667	0.235504	0.20203			0.406667	0.0366977	0.0155784				0.406667	0.00566238	0.00579198
0.407083	0.236137	0.202583			0.407083	0.0361611	0.015675				0.407083	0.00570426	0.00606782
0.4075	0.235351	0.202496			0.4075	0.036552	0.0157005				0.4075	0.00574707	0.00598426
0.407917	0.235893	0.201284			0.407917	0.0365821	0.0155887				0.407917	0.00575574	0.00656283
0.408333	0.236982	0.2017			0.408333	0.0367583	0.0155649				0.408333	0.00574059	0.00578228
0.40875	0.236719	0.202339			0.40875	0.0369102	0.0155278				0.40875	0.0057652	0.00597302
0.409167	0.23715	0.201671			0.409167	0.0371078	0.0151462				0.409167	0.00575077	0.00659773
0.409583	0.237196	0.201736			0.409583	0.0372775	0.0149992				0.409583	0.0056934	0.00558068
0.41	0.237076	0.201558			0.41	0.0379245	0.0152208				0.41	0.00567009	0.00621568
0.410417	0.236118	0.201925			0.410417	0.0376375	0.0152588				0.410417	0.00581995	0.00636344
0.410833	0.237664	0.202406			0.410833	0.0377504	0.0152326				0.410833	0.00568884	0.00559174
0.41125	0.236877	0.202941			0.41125	0.037361	0.0152816				0.41125	0.00573396	0.00613864
0.411667	0.235874	0.202743			0.411667	0.0373652	0.0153365				0.411667	0.00568438	0.00597392
0.412083	0.236717	0.203152			0.412083	0.0375954	0.0154402				0.412083	0.00578462	0.00585143
0.4125	0.237275	0.203097			0.4125	0.0384243	0.0153718				0.4125	0.00569079	0.00634654
0.412917	0.237692	0.203035			0.412917	0.0382627	0.0154186				0.412917	0.00569928	0.00570951
0.413333	0.238798	0.202833			0.413333	0.0384798	0.0154253				0.413333	0.00577494	0.00614685
0.41375	0.238502	0.202495			0.41375	0.0388663	0.01547				0.41375	0.00571816	0.00582432
0.414167	0.237398	0.200981			0.414167	0.0389951	0.0153628				0.414167	0.00569299	0.00594114
0.414583	0.237536	0.202446			0.414583	0.0392162	0.0154353				0.414583	0.0057526	0.00592154
0.415	0.237426	0.203035			0.415	0.0389125	0.0153889				0.415	0.00570375	0.00599061
0.415417	0.237757	0.202795			0.415417	0.0391819	0.0153911				0.415417	0.00567399	0.0064086
0.415833	0.237736	0.203508			0.415833	0.0389951	0.0155585				0.415833	0.0056959	0.00562241
0.41625	0.238304	0.203989			0.41625	0.0389553	0.0155088				0.41625	0.0057459	0.00647884
0.416667	0.238115	0.203963			0.416667	0.0396001	0.0154697				0.416667	0.00567327	0.00596614
0.417083	0.23941	0.204129			0.417083	0.0394989	0.0154304				0.417083	0.00571566	0.00553638
0.4175	0.237644	0.203833			0.4175	0.0401478	0.0154097				0.4175	0.00575764	0.00600953
0.417917	0.238305	0.202659			0.417917	0.0401389	0.0153818				0.417917	0.00572267	0.00610299
0.418333	0.23845	0.203602			0.418333	0.0397998	0.0153556				0.418333	0.00571248	0.0057504
0.41875	0.239252	0.203841			0.41875	0.0404457	0.0152264				0.41875	0.00574454	0.00643241
0.419167	0.239534	0.203985			0.419167	0.0411302	0.0151413				0.419167	0.00578739	0.0055994
0.419583	0.238892	0.203222			0.419583	0.0411485	0.0151369				0.419583	0.00570629	0.00576058
0.42	0.238762	0.20236			0.42	0.0407791	0.0150956				0.42	0.00571234	0.0058484
0.420417	0.239461	0.202939			0.420417	0.0408975	0.0151831				0.420417	0.0056923	0.00636608
0.420833	0.240164	0.20337			0.420833	0.040987	0.0151563				0.420833	0.00576772	0.00558801
0.42125	0.239742	0.203464			0.42125	0.0412897	0.0148497				0.42125	0.00569438	0.00610327
0.421667	0.239994	0.204541			0.421667	0.0411556	0.0148999				0.421667	0.00566016	0.0061649
0.422083	0.242064	0.204019			0.422083	0.041004	0.0148893				0.422083	0.00576335	0.00566512
0.4225	0.241476	0.202936			0.4225	0.04171	0.0151574				0.4225	0.00567756	0.00596065
0.422917	0.24095	0.203405			0.422917	0.0421369	0.0150356				0.422917	0.00574288	0.00568326
0.423333	0.240593	0.203273			0.423333	0.0420918	0.0149883				0.423333	0.00571253	0.00578456
0.42375	0.240616	0.202714			0.42375	0.0423817	0.0149958				0.42375	0.00568288	0.00600485
0.424167	0.240803	0.204372			0.424167	0.0427628	0.0150141				0.424167	0.00571654	0.00584755
0.424583	0.241266	0.204944			0.424583	0.0424315	0.014912				0.424583	0.00572364	0.00572924
0.425	0.241364	0.205093			0.425	0.0432407	0.0149077				0.425	0.00573746	0.00599611
0.425417	0.240534	0.204538			0.425417	0.0433146	0.0147609				0.425417	0.00568485	0.00563045
0.425833	0.241446	0.203525			0.425833	0.0428231	0.014913				0.425833	0.00574225	0.0064652
0.42625	0.24013	0.203953			0.42625	0.0435136	0.0148506				0.42625	0.0057304	0.0058484
0.426667	0.241558	0.204747			0.426667	0.0438016	0.0148779				0.426667	0.00567847	0.00554068
0.427083	0.241585	0.20398			0.427083	0.0436581	0.0151344				0.427083	0.00575563	0.00573947
0.4275	0.240777	0.204129			0.4275	0.04378	0.0150856				0.4275	0.00571974	0.00573319
0.427917	0.242307	0.204515			0.427917	0.0435861	0.0148905				0.427917	0.00565754	0.006132
0.428333	0.242889	0.204343			0.428333	0.0439911	0.0147868				0.428333	0.00572898	0.00555638
0.42875	0.24217	0.204813			0.42875	0.0440962	0.014922				0.42875	0.005668	0.00576798
0.429167	0.242257	0.20396			0.429167	0.04442	0.0149542				0.429167	0.00571601	0.00623135
0.429583	0.242905	0.204771			0.429583	0.0447011	0.0149154				0.429583	0.00568921	0.00576853
0.43	0.242647	0.204102			0.43	0.0446679	0.0149904				0.43	0.00571432	0.00629682
0.430417	0.242693	0.204794			0.430417	0.0442054	0.0150348				0.430417	0.00563898	0.00555912
0.430833	0.243384	0.204731			0.430833	0.0442895	0.015174				0.430833	0.00573332	0.00551714
0.43125	0.243592	0.203711			0.43125	0.0453348	0.0150665				0.43125	0.00567389	0.00574966
0.431667	0.243104	0.204848			0.431667	0.0451823	0.0149727				0.431667	0.00569531	0.00566198
0.432083	0.24313	0.204788			0.432083	0.0459442	0.0150676				0.432083	0.00572477	0.00573449
0.4325	0.242634	0.205223			0.4325	0.0456001	0.0150758				0.4325	0.00569332	0.00581317
0.432917	0.242287	0.206106			0.432917	0.0452711	0.0151249				0.432917	0.0056351	0.00563691
0.433333	0.242834	0.206973			0.433333	0.0457691	0.0152397				0.433333	0.0057063	0.00610481
0.43375	0.244054	0.205127			0.43375	0.0465866	0.0151825				0.43375	0.00569109	0.00562563
0.434167	0.243834	0.204385			0.434167	0.0461926	0.0152612				0.434167	0.00559621	0.00558023
0.434583	0.243681	0.204733			0.434583	0.0466499	0.0151144				0.434583	0.00573508	0.00624799
0.435	0.243254	0.205471			0.435	0.046714	0.0149834				0.435	0.00571706	0.00536818
0.435417	0.244062	0.205732			0.435417	0.0471281	0.0150423				0.435417	0.005697	0.00557238
0.435833	0.244943	0.205395			0.435833	0.0469949	0.0150882				0.435833	0.00563128	0.00570565
0.43625	0.244233	0.205089			0.43625	0.0470007	0.0149081				0.43625	0.00568596	0.00564548
0.436667	0.243797	0.205245			0.436667	0.0472452	0.0148688				0.436667	0.00568889	0.00565382
0.437083	0.244403	0.206434			0.437083	0.0477576	0.0149452				0.437083	0.00572582	0.0056389
0.4375	0.243904	0.205625			0.4375	0.0484636	0.0148735				0.4375	0.00560052	0.00562972
0.437917	0.244221	0.205024			0.437917	0.0477711	0.0148389				0.437917	0.00564176	0.00558433
0.438333	0.24457	0.205565			0.438333	0.0480465	0.0147737				0.438333	0.00569823	0.00564218
0.43875	0.245431	0.205918			0.43875	0.0482948	0.0147862				0.43875	0.00564944	0.00560715
0.439167	0.24566	0.206438			0.439167	0.0488714	0.0147182				0.439167	0.00566491	0.00557172
0.439583	0.245312	0.205175			0.439583	0.0485007	0.0148666				0.439583	0.00566796	0.00562682
0.44	0.244783	0.205627			0.44	0.0493974	0.0148037				0.44	0.00567176	0.00566996
0.440417	0.245829	0.205812			0.440417	0.0489531	0.0148461				0.440417	0.00570451	0.00603351
0.440833	0.24542	0.206575			0.440833	0.0493403	0.0147069				0.440833	0.00565143	0.00573888
0.44125	0.245205	0.206374			0.44125	0.0492512	0.0146633				0.44125	0.00565789	0.00550007
0.441667	0.246413	0.206202			0.441667	0.0493749	0.0146344				0.441667	0.00572667	0.00576588
0.442083	0.246966	0.205728			0.442083	0.0504062	0.0148237				0.442083	0.00563106	0.00592036
0.4425	0.246453	0.204283			0.4425	0.0504857	0.0148887				0.4425	0.00567912	0.00543191
0.442917	0.246452	0.206424			0.442917	0.0503803	0.0151255				0.442917	0.00567592	0.00550492
0.443333	0.24591	0.207301			0.443333	0.0506108	0.0149225				0.443333	0.00566164	0.00574791
0.44375	0.246253	0.207318			0.44375	0.0514324	0.0150475				0.44375	0.0056623	0.00551672
0.444167	0.247637	0.20685			0.444167	0.0510543	0.0150359				0.444167	0.00565972	0.00553137
0.444583	0.246984	0.206732			0.444583	0.0508655	0.0149042				0.444583	0.00568896	0.00556136
0.445	0.24726	0.207904			0.445	0.0514893	0.0149247				0.445	0.0056845	0.00561559
0.445417	0.24704	0.206781			0.445417	0.0518414	0.0150352				0.445417	0.00562296	0.00552454
0.445833	0.247367	0.206703			0.445833	0.051852	0.0151701				0.445833	0.00569998	0.00563931
0.44625	0.247751	0.20594			0.44625	0.0521035	0.0150495				0.44625	0.00567266	0.0060739
0.446667	0.248277	0.207743			0.446667	0.052057	0.0150059				0.446667	0.00563568	0.00539682
0.447083	0.247863	0.207155			0.447083	0.0516757	0.0151292				0.447083	0.00564748	0.00593438
0.4475	0.24819	0.20664			0.4475	0.0520314	0.0151285				0.4475	0.00556368	0.00517248
0.447917	0.247817	0.206886			0.447917	0.0520495	0.0150298				0.447917	0.00565627	0.00582498
0.448333	0.247789	0.207429			0.448333	0.0522519	0.014935				0.448333	0.00567085	0.00559652
0.44875	0.247504	0.20688			0.44875	0.0528718	0.0148454				0.44875	0.00567646	0.0054111
0.449167	0.247977	0.207265			0.449167	0.0527449	0.0148548				0.449167	0.00559493	0.00602059
0.449583	0.24849	0.207808			0.449583	0.0527729	0.0147982				0.449583	0.00565198	0.00557833
0.45	0.248238	0.208434			0.45	0.0530174	0.0148044				0.45	0.0056779	0.00501721
0.450417	0.247921	0.208923			0.450417	0.0534247	0.0148941				0.450417	0.00567267	0.00560862
0.450833	0.248291	0.207428			0.450833	0.0536815	0.0148161				0.450833	0.00565016	0.00554957
0.45125	0.249269	0.206743			0.45125	0.0544403	0.0148508				0.45125	0.00568808	0.00605762
0.451667	0.248495	0.206702			0.451667	0.054298	0.0147514				0.451667	0.00563701	0.00534143
0.452083	0.248394	0.208154			0.452083	0.0550173	0.0147407				0.452083	0.00562977	0.0052798
0.4525	0.249397	0.209731			0.4525	0.0547155	0.014836				0.4525	0.00567917	0.00600879
0.452917	0.248414	0.207571			0.452917	0.0543665	0.0149605				0.452917	0.00567601	0.00550003
0.453333	0.248566	0.206717			0.453333	0.0556572	0.0148493				0.453333	0.00564161	0.00590285
0.45375	0.249032	0.206899			0.45375	0.0555561	0.0147376				0.45375	0.00562346	0.00500904
0.454167	0.249586	0.207608			0.454167	0.0549977	0.0147199				0.454167	0.00561737	0.0053664
0.454583	0.249592	0.207356			0.454583	0.055672	0.0147173				0.454583	0.00569966	0.0059404
0.455	0.249386	0.207362			0.455	0.0557594	0.0147314				0.455	0.00560534	0.00506251
0.455417	0.248709	0.208054			0.455417	0.0557921	0.0147227				0.455417	0.00562508	0.00543124
0.455833	0.249362	0.208117			0.455833	0.0561797	0.0147114				0.455833	0.00558593	0.00538994
0.45625	0.249648	0.207828			0.45625	0.0570081	0.0146766				0.45625	0.00565795	0.00571342
0.456667	0.24973	0.20823			0.456667	0.0568973	0.0147347				0.456667	0.00557076	0.00517477
0.457083	0.249609	0.20854			0.457083	0.0568824	0.0146642				0.457083	0.00563619	0.00565194
0.4575	0.249872	0.207736			0.4575	0.0573641	0.0146899				0.4575	0.00566905	0.00571013
0.457917	0.250628	0.207291			0.457917	0.0579647	0.0146139				0.457917	0.00555465	0.00512143
0.458333	0.251668	0.207254			0.458333	0.0578389	0.0147546				0.458333	0.00563115	0.0053959
0.45875	0.251694	0.208053			0.45875	0.0575545	0.0147036				0.45875	0.00562773	0.00572027
0.459167	0.251723	0.207954			0.459167	0.0579659	0.014634				0.459167	0.0055603	0.00523367
0.459583	0.251839	0.207248			0.459583	0.0586428	0.0147609				0.459583	0.00562142	0.00596082
0.46	0.251702	0.208179			0.46	0.0592437	0.0147991				0.46	0.00566913	0.00499482
0.460417	0.25119	0.209058			0.460417	0.0594772	0.0147452				0.460417	0.00562692	0.00610106
0.460833	0.251193	0.208737			0.460833	0.0588015	0.0146458				0.460833	0.00558836	0.00479441
0.46125	0.252068	0.208425			0.46125	0.0593988	0.0146983				0.46125	0.00562175	0.00602238
0.461667	0.252709	0.208954			0.461667	0.0601234	0.0146238				0.461667	0.00556221	0.00501446
0.462083	0.251731	0.208812			0.462083	0.0601814	0.0145657				0.462083	0.00563949	0.0052516
0.4625	0.251839	0.207956			0.4625	0.0601076	0.0146358				0.4625	0.00557022	0.00616604
0.462917	0.251616	0.208078			0.462917	0.0603029	0.0146415				0.462917	0.00572615	0.00482245
0.463333	0.251604	0.207938			0.463333	0.0602197	0.0147646				0.463333	0.00559967	0.00534389
0.46375	0.252183	0.208872			0.46375	0.0605976	0.0146369				0.46375	0.005671	0.00550532
0.464167	0.25279	0.208737			0.464167	0.0598333	0.0147211				0.464167	0.00560623	0.00548127
0.464583	0.252252	0.208771			0.464583	0.0612127	0.0147213				0.464583	0.00564885	0.00517581
0.465	0.252048	0.207746			0.465	0.0618783	0.0147673				0.465	0.00564007	0.00528583
0.465417	0.252641	0.208853			0.465417	0.0615517	0.0147449				0.465417	0.00555211	0.00574661
0.465833	0.253992	0.208963			0.465833	0.0622636	0.014601				0.465833	0.0056268	0.00515395
0.46625	0.25453	0.208546			0.46625	0.0623003	0.0145419				0.46625	0.00557934	0.00589025
0.466667	0.254292	0.208607			0.466667	0.0622701	0.0144902				0.466667	0.00561373	0.00497511
0.467083	0.254061	0.208751			0.467083	0.0626397	0.014548				0.467083	0.00559341	0.00543569
0.4675	0.253865	0.209866			0.4675	0.0625543	0.0145389				0.4675	0.00558666	0.00538482
0.467917	0.254076	0.209975			0.467917	0.0627826	0.0144912				0.467917	0.00564699	0.00518987
0.468333	0.254639	0.210513			0.468333	0.0636596	0.0145232				0.468333	0.00566315	0.00592006
0.46875	0.254805	0.209768			0.46875	0.0636328	0.0145874				0.46875	0.00557505	0.0049853
0.469167	0.254765	0.208458			0.469167	0.0637122	0.0145154				0.469167	0.00563535	0.00514336
0.469583	0.255046	0.209055			0.469583	0.0654025	0.0145119				0.469583	0.00557274	0.00537976
0.47	0.254469	0.209457			0.47	0.0650029	0.0145766				0.47	0.00562909	0.00593947
0.470417	0.25502	0.209553			0.470417	0.0638303	0.0145549				0.470417	0.00558491	0.00474443
0.470833	0.255787	0.210851			0.470833	0.0641687	0.0145712				0.470833	0.00558592	0.00532045
0.47125	0.255018	0.210167			0.47125	0.0644452	0.0142895				0.47125	0.00568176	0.00555477
0.471667	0.254254	0.210913			0.471667	0.0654225	0.0144211				0.471667	0.00560418	0.00567959
0.472083	0.253933	0.209953			0.472083	0.0651882	0.0146465				0.472083	0.00560552	0.00549393
0.4725	0.254476	0.210195			0.4725	0.0654338	0.0147781				0.4725	0.00557021	0.00503081
0.472917	0.254764	0.209142			0.472917	0.0651817	0.0147187				0.472917	0.00557331	0.00497761
0.473333	0.255009	0.208077			0.473333	0.0661444	0.014651				0.473333	0.00565356	0.00569269
0.47375	0.254696	0.208134			0.47375	0.0662013	0.0147073				0.47375	0.00555045	0.00492682
0.474167	0.254621	0.210027			0.474167	0.0659834	0.0146499				0.474167	0.00559149	0.00521498
0.474583	0.255093	0.209681			0.474583	0.0671276	0.0146591				0.474583	0.00557708	0.00519224
0.475	0.255612	0.210312			0.475	0.0675324	0.0147272				0.475	0.00557516	0.00582787
0.475417	0.255623	0.210595			0.475417	0.0666193	0.014765				0.475417	0.00557933	0.00484718
0.475833	0.256024	0.209621			0.475833	0.0672453	0.0147252				0.475833	0.00556067	0.00519812
0.47625	0.255734	0.210106			0.47625	0.0682974	0.014696				0.47625	0.0056501	0.00515268
0.476667	0.25576	0.210607			0.476667	0.0678063	0.0147369				0.476667	0.00555814	0.00570765
0.477083	0.255938	0.211154			0.477083	0.0685347	0.0147609				0.477083	0.00556517	0.00484711
0.4775	0.25646	0.211929			0.4775	0.068792	0.0147283				0.4775	0.00561924	0.00514569
0.477917	0.256936	0.21102			0.477917	0.0687511	0.0147036				0.477917	0.00556629	0.00551226
0.478333	0.257069	0.209594			0.478333	0.0698228	0.0146305				0.478333	0.00556819	0.00560347
0.47875	0.255967	0.210558			0.47875	0.0695282	0.0146809				0.47875	0.00564468	0.00476172
0.479167	0.255132	0.210553			0.479167	0.0702091	0.0146153				0.479167	0.00560492	0.00514916
0.479583	0.256973	0.210119			0.479583	0.0710518	0.0145177				0.479583	0.00548812	0.00555949
0.48	0.257493	0.21097			0.48	0.0704023	0.0145169				0.48	0.00560624	0.00522228
0.480417	0.257063	0.211156			0.480417	0.0705477	0.0145212				0.480417	0.00559017	0.00488749
0.480833	0.25707	0.210568			0.480833	0.070803	0.0145896				0.480833	0.00556622	0.0052552
0.48125	0.256815	0.212055			0.48125	0.0711555	0.0144688				0.48125	0.00552311	0.00499601
0.481667	0.257384	0.210974			0.481667	0.0717608	0.0144853				0.481667	0.00559734	0.00585341
0.482083	0.257335	0.210781			0.482083	0.0711144	0.0145532				0.482083	0.00558852	0.00458561
0.4825	0.258283	0.211577			0.4825	0.0708906	0.0144728				0.4825	0.00553923	0.00536165
0.482917	0.257354	0.212636			0.482917	0.0725005	0.0144791				0.482917	0.00560465	0.00503484
0.483333	0.257721	0.212475			0.483333	0.0733308	0.0144693				0.483333	0.00549121	0.00504953
0.48375	0.257783	0.21259			0.48375	0.0729416	0.0146014				0.48375	0.00557285	0.00559264
0.484167	0.257843	0.211463			0.484167	0.0722379	0.014556				0.484167	0.00557287	0.00548258
0.484583	0.258434	0.212592			0.484583	0.0722367	0.01462				0.484583	0.00555331	0.0048339
0.485	0.258285	0.212439			0.485	0.0731915	0.0146042				0.485	0.00557452	0.00509561
0.485417	0.259062	0.211628			0.485417	0.0732399	0.0144898				0.485417	0.00559624	0.00495187
0.485833	0.258608	0.212482			0.485833	0.0735289	0.014481				0.485833	0.00550399	0.00502481
0.48625	0.258615	0.21176			0.48625	0.0742453	0.0145777				0.48625	0.0055975	0.00510051
0.486667	0.258581	0.212266			0.486667	0.0739765	0.0146002				0.486667	0.0055933	0.00514255
0.487083	0.259167	0.212447			0.487083	0.0751767	0.0145858				0.487083	0.00562072	0.00513396
0.4875	0.259287	0.211401			0.4875	0.0752552	0.0146675				0.4875	0.00553486	0.00516443
0.487917	0.25906	0.210927			0.487917	0.0757065	0.0145181				0.487917	0.00553505	0.00511119
0.488333	0.259697	0.211888			0.488333	0.0753101	0.0144684				0.488333	0.00555595	0.00492671
0.48875	0.259845	0.210804			0.48875	0.0751166	0.014429				0.48875	0.0055236	0.00512919
0.489167	0.259759	0.211622			0.489167	0.0760565	0.0144262				0.489167	0.00548955	0.00557692
0.489583	0.260092	0.212351			0.489583	0.0757956	0.0143655				0.489583	0.00559545	0.00494263
0.49	0.260135	0.211953			0.49	0.0761489	0.0143844				0.49	0.00558289	0.004804
0.490417	0.260055	0.212106			0.490417	0.0764709	0.0143832				0.490417	0.00555878	0.00504446
0.490833	0.260579	0.211816			0.490833	0.0759803	0.0144069				0.490833	0.0054937	0.00509117
0.49125	0.259602	0.211725			0.49125	0.0764103	0.0144246				0.49125	0.00557726	0.00577088
0.491667	0.259596	0.211827			0.491667	0.0778845	0.0144951				0.491667	0.005579	0.00451849
0.492083	0.260224	0.21144			0.492083	0.0774035	0.0145674				0.492083	0.00553829	0.00557402
0.4925	0.259668	0.211739			0.4925	0.0766728	0.0144371				0.4925	0.00550422	0.00485442
0.492917	0.259558	0.211477			0.492917	0.078114	0.0144218				0.492917	0.00553729	0.0052789
0.493333	0.260243	0.212128			0.493333	0.0790576	0.0144149				0.493333	0.00552824	0.00484066
0.49375	0.259175	0.212309			0.49375	0.0792273	0.0145058				0.49375	0.00550413	0.00502475
0.494167	0.260463	0.211987			0.494167	0.0789881	0.0145604				0.494167	0.00551916	0.00501959
0.494583	0.260285	0.211746			0.494583	0.0788027	0.0144994				0.494583	0.0055385	0.00531672
0.495	0.26013	0.212666			0.495	0.0795363	0.0144374				0.495	0.00548323	0.00487071
0.495417	0.259803	0.212367			0.495417	0.0796842	0.0143665				0.495417	0.00549962	0.00500265
0.495833	0.260213	0.212565			0.495833	0.0803073	0.0144628				0.495833	0.00556017	0.00563037
0.49625	0.260656	0.212041			0.49625	0.0807273	0.0144656				0.49625	0.00555224	0.00459495
0.496667	0.260874	0.212652			0.496667	0.0808698	0.0144893				0.496667	0.00551667	0.00498833
0.497083	0.260463	0.213193			0.497083	0.0814975	0.0144401				0.497083	0.00552979	0.00535157
0.4975	0.260099	0.212902			0.4975	0.0818571	0.0144023				0.4975	0.00548917	0.00484672
0.497917	0.260883	0.21194			0.497917	0.0809557	0.0143625				0.497917	0.0055556	0.0055423
0.498333	0.26112	0.21217			0.498333	0.0811265	0.0143835				0.498333	0.00555081	0.00447285
0.49875	0.261343	0.212656			0.49875	0.0819142	0.0143972				0.49875	0.00548968	0.00504273
0.499167	0.261242	0.212658			0.499167	0.0816469	0.0144305				0.499167	0.00557069	0.00543856
0.499583	0.260679	0.212581			0.499583	0.0819223	0.0144291				0.499583	0.00551761	0.00447727
0.5	0.261383	0.212088			0.5	0.0822644	0.0144131				0.5	0.00551955	0.00495026
0.500417	0.262032	0.212086			0.500417	0.0839006	0.0143295				0.500417	0.00555266	0.00509389
0.500833	0.261462	0.211525			0.500833	0.0837179	0.014323				0.500833	0.00551289	0.00490446
0.50125	0.261177	0.211028			0.50125	0.0828317	0.0143882				0.50125	0.00556231	0.00558129
0.501667	0.261796	0.211682			0.501667	0.0836701	0.0144193				0.501667	0.00549409	0.00465162
0.502083	0.261865	0.211633			0.502083	0.0839417	0.0143115				0.502083	0.00550201	0.00484387
0.5025	0.26179	0.211567			0.5025	0.085015	0.0143224				0.5025	0.00550268	0.00511063
0.502917	0.26208	0.213197			0.502917	0.0849696	0.014292				0.502917	0.00549086	0.00529257
0.503333	0.261678	0.212797			0.503333	0.0847206	0.0143035				0.503333	0.00549525	0.00521875
0.50375	0.261604	0.211882			0.50375	0.0853935	0.0143478				0.50375	0.00551167	0.00449823
0.504167	0.261901	0.212489			0.504167	0.0863518	0.014308				0.504167	0.00545344	0.00476436
0.504583	0.261852	0.21297			0.504583	0.0857656	0.0143658				0.504583	0.00551718	0.00548743
0.505	0.262166	0.213535			0.505	0.0867498	0.0143932				0.505	0.00549713	0.00459791
0.505417	0.262932	0.212024			0.505417	0.0856477	0.0143271				0.505417	0.00543393	0.00560512
0.505833	0.262445	0.21179			0.505833	0.0857298	0.0144153				0.505833	0.00552406	0.00487755
0.50625	0.262337	0.212532			0.50625	0.0879056	0.0143514				0.50625	0.00543077	0.00445459
0.506667	0.26226	0.212877			0.506667	0.0866546	0.0143404				0.506667	0.00546909	0.00495713
0.507083	0.262125	0.211968			0.507083	0.0879141	0.0143488				0.507083	0.00550809	0.00538649
0.5075	0.263144	0.212222			0.5075	0.0877514	0.0144224				0.5075	0.0054607	0.00465493
0.507917	0.26296	0.213126			0.507917	0.0870674	0.0143974				0.507917	0.00548662	0.0048446
0.508333	0.262494	0.213049			0.508333	0.0879525	0.0143686				0.508333	0.00545602	0.00491079
0.50875	0.263539	0.213927			0.50875	0.0872749	0.0143402				0.50875	0.00551178	0.00548196
0.509167	0.263593	0.213209			0.509167	0.0881606	0.0143621				0.509167	0.00542118	0.00453458
0.509583	0.263578	0.211658			0.509583	0.0898229	0.0143034				0.509583	0.00554246	0.00467749
0.51	0.263719	0.21377			0.51	0.0904516	0.0142754				0.51	0.0055072	0.00483545
0.510417	0.263104	0.213708			0.510417	0.0903248	0.0143832				0.510417	0.00548166	0.00529369
0.510833	0.26359	0.212636			0.510833	0.0906639	0.0144056				0.510833	0.00547674	0.00456352
0.51125	0.263979	0.212225			0.51125	0.0898556	0.014255				0.51125	0.00549653	0.00540484
0.511667	0.263933	0.214328			0.511667	0.0901806	0.0142141				0.511667	0.00541831	0.00456082
0.512083	0.263341	0.213844			0.512083	0.0903588	0.014262				0.512083	0.005473	0.00475115
0.5125	0.263959	0.21317			0.5125	0.0925089	0.0142522				0.5125	0.00553662	0.00541124
0.512917	0.263551	0.212921			0.512917	0.0911018	0.0142045				0.512917	0.00544165	0.00454554
0.513333	0.26406	0.212748			0.513333	0.092031	0.0143014				0.513333	0.00543466	0.0048289
0.51375	0.264449	0.213401			0.51375	0.0929719	0.0143145				0.51375	0.00543149	0.00479589
0.514167	0.26433	0.213227			0.514167	0.093282	0.014364				0.514167	0.00545983	0.00501239
0.514583	0.264223	0.213112			0.514583	0.0937429	0.014347				0.514583	0.0054532	0.00492544
0.515	0.264285	0.213531			0.515	0.0937431	0.014355				0.515	0.00537365	0.00487703
0.515417	0.264226	0.212776			0.515417	0.09291	0.0143886				0.515417	0.00550456	0.00547855
0.515833	0.264396	0.212974			0.515833	0.0928491	0.0143225				0.515833	0.00547255	0.00473286
0.51625	0.263741	0.212473			0.51625	0.093455	0.014308				0.51625	0.00536235	0.00451159
0.516667	0.264293	0.212091			0.516667	0.0961746	0.0143102				0.516667	0.00547023	0.00476501
0.517083	0.264221	0.212073			0.517083	0.0945831	0.0143374				0.517083	0.0054332	0.00476091
0.5175	0.264644	0.212503			0.5175	0.0945883	0.0141909				0.5175	0.00544785	0.00477532
0.517917	0.264021	0.213455			0.517917	0.0953968	0.0142045				0.517917	0.00549986	0.00484511
0.518333	0.264721	0.213433			0.518333	0.0945794	0.0141691				0.518333	0.00549064	0.0048009
0.51875	0.264057	0.213325			0.51875	0.0955447	0.0142566				0.51875	0.00541959	0.00484439
0.519167	0.264314	0.213754			0.519167	0.0953713	0.0141979				0.519167	0.00546964	0.00506933
0.519583	0.263965	0.212329			0.519583	0.0975922	0.0142191				0.519583	0.00546006	0.00470105
0.52	0.264668	0.212535			0.52	0.0961761	0.0141887				0.52	0.00548767	0.00505828
0.520417	0.265034	0.213465			0.520417	0.0965162	0.0142029				0.520417	0.00543769	0.00462252
0.520833	0.264859	0.213833			0.520833	0.0977226	0.0142301				0.520833	0.00545813	0.00481818
0.52125	0.264675	0.214283			0.52125	0.0983191	0.014323				0.52125	0.00546822	0.0047385
0.521667	0.264916	0.213779			0.521667	0.0977541	0.0142406				0.521667	0.0054163	0.00510953
0.522083	0.265194	0.213919			0.522083	0.0968153	0.0142626				0.522083	0.00545778	0.00465384
0.5225	0.265305	0.213343			0.5225	0.0985003	0.0142324				0.5225	0.00542644	0.00501931
0.522917	0.265469	0.214145			0.522917	0.0983242	0.0142596				0.522917	0.00542809	0.00451924
0.523333	0.265466	0.213275			0.523333	0.0991854	0.014161				0.523333	0.00541213	0.00476053
0.52375	0.264914	0.21283			0.52375	0.0989392	0.0141362				0.52375	0.00541326	0.00472802
0.524167	0.265246	0.212019			0.524167	0.100553	0.0141021				0.524167	0.00542351	0.00556811
0.524583	0.265288	0.211974			0.524583	0.099838	0.0141521				0.524583	0.00544852	0.00412651
0.525	0.265339	0.212055			0.525	0.101835	0.0141949				0.525	0.00543842	0.00509163
0.525417	0.265433	0.212524			0.525417	0.10196	0.0141957				0.525417	0.00545647	0.00507445
0.525833	0.264948	0.212946			0.525833	0.102115	0.0142476				0.525833	0.00544459	0.00434021
0.52625	0.264883	0.212453			0.52625	0.103853	0.0142928				0.52625	0.00539779	0.00470115
0.526667	0.264575	0.21288			0.526667	0.102998	0.0143872				0.526667	0.00548685	0.00462893
0.527083	0.265164	0.213582			0.527083	0.102646	0.0143176				0.527083	0.00534445	0.00558348
0.5275	0.265283	0.214651			0.5275	0.103066	0.0142651				0.5275	0.00546963	0.00426675
0.527917	0.265068	0.21388			0.527917	0.104109	0.0143497				0.527917	0.00546849	0.00465998
0.528333	0.265056	0.214265			0.528333	0.102693	0.014366				0.528333	0.00542467	0.00465062
0.52875	0.265946	0.213616			0.52875	0.103236	0.0142845				0.52875	0.00537125	0.00484756
0.529167	0.26476	0.213444			0.529167	0.105337	0.0142632				0.529167	0.00544813	0.00460087
0.529583	0.265865	0.214362			0.529583	0.104938	0.0141718				0.529583	0.00540929	0.00462841
0.53	0.265744	0.213416			0.53	0.104427	0.0141832				0.53	0.00540837	0.00518489
0.530417	0.265682	0.213387			0.530417	0.105812	0.0141436				0.530417	0.00536576	0.00431348
0.530833	0.265479	0.213394			0.530833	0.105736	0.0140972				0.530833	0.00546613	0.00530007
0.53125	0.265461	0.213235			0.53125	0.106277	0.0141232				0.53125	0.00540749	0.0047792
0.531667	0.265759	0.21246			0.531667	0.104404	0.0141319				0.531667	0.00535947	0.00447849
0.532083	0.265712	0.213537			0.532083	0.106004	0.0140574				0.532083	0.00544122	0.00460007
0.5325	0.26608	0.213302			0.5325	0.106893	0.0140842				0.5325	0.00539466	0.005515
0.532917	0.266868	0.213527			0.532917	0.104878	0.0140657				0.532917	0.0053698	0.00466812
0.533333	0.26661	0.214008			0.533333	0.107056	0.0139686				0.533333	0.00540122	0.00488477
0.53375	0.267114	0.213679			0.53375	0.107505	0.0140044				0.53375	0.00546873	0.00440235
0.534167	0.267487	0.214338			0.534167	0.108194	0.0141067				0.534167	0.00539954	0.00451576
0.534583	0.266525	0.214647			0.534583	0.108514	0.0141192				0.534583	0.0053778	0.00461457
0.535	0.266407	0.213813			0.535	0.110335	0.0140607				0.535	0.00539093	0.00465658
0.535417	0.266515	0.214191			0.535417	0.108949	0.0139539				0.535417	0.00542709	0.00521826
0.535833	0.26673	0.213513			0.535833	0.110251	0.014005				0.535833	0.00533422	0.00455522
0.53625	0.268038	0.21418			0.53625	0.109454	0.014031				0.53625	0.00547654	0.00454311
0.536667	0.268121	0.214386			0.536667	0.110088	0.014076				0.536667	0.00531441	0.00466945
0.537083	0.266645	0.214635			0.537083	0.110544	0.0140082				0.537083	0.0053898	0.00464716
0.5375	0.267801	0.214088			0.5375	0.110886	0.0140936				0.5375	0.00541705	0.0045555
0.537917	0.266891	0.214256			0.537917	0.112374	0.0141151				0.537917	0.00537711	0.00455022
0.538333	0.267347	0.213345			0.538333	0.111884	0.0141718				0.538333	0.00538693	0.00470752
0.53875	0.267807	0.213671			0.53875	0.11313	0.0140198				0.53875	0.00543366	0.00504844
0.539167	0.267581	0.213538			0.539167	0.112986	0.0140161				0.539167	0.00535031	0.00448673
0.539583	0.268123	0.213026			0.539583	0.11309	0.0139897				0.539583	0.00534017	0.00456351
0.54	0.268105	0.214456			0.54	0.114581	0.0140229				0.54	0.00539626	0.00531691
0.540417	0.268059	0.213781			0.540417	0.113946	0.0140165				0.540417	0.00533133	0.00452634
0.540833	0.26768	0.214078			0.540833	0.115272	0.0141281				0.540833	0.00542777	0.00448662
0.54125	0.268888	0.213851			0.54125	0.115439	0.0139867				0.54125	0.00532664	0.00464293
0.541667	0.268821	0.214608			0.541667	0.114391	0.0139769				0.541667	0.00535872	0.00465144
0.542083	0.269722	0.214759			0.542083	0.114737	0.014015				0.542083	0.00542636	0.00520463
0.5425	0.269281	0.215171			0.5425	0.116172	0.0140084				0.5425	0.00530728	0.00435067
0.542917	0.269357	0.214372			0.542917	0.116551	0.0140386				0.542917	0.00543378	0.00453457
0.543333	0.269734	0.214347			0.543333	0.116666	0.0139637				0.543333	0.00533764	0.00460246
0.54375	0.269875	0.2153			0.54375	0.116372	0.0140403				0.54375	0.00539929	0.00468257
0.544167	0.268875	0.215016			0.544167	0.116628	0.0140105				0.544167	0.00537469	0.00456929
0.544583	0.26943	0.214384			0.544583	0.116836	0.0139422				0.544583	0.00535118	0.00463843
0.545	0.26961	0.214269			0.545	0.116686	0.0139265				0.545	0.00534489	0.00465234
0.545417	0.269412	0.214218			0.545417	0.118046	0.013984				0.545417	0.00539683	0.00462429
0.545833	0.269363	0.214147			0.545833	0.118086	0.0140026				0.545833	0.00530734	0.00465571
0.54625	0.269409	0.214613			0.54625	0.118245	0.0137258				0.54625	0.00545935	0.00451436
0.546667	0.268871	0.213706			0.546667	0.119777	0.0138497				0.546667	0.00531863	0.00508033
0.547083	0.271828	0.214654			0.547083	0.118628	0.0138367				0.547083	0.00545822	0.00445983
0.5475	0.271781	0.213902			0.5475	0.118771	0.0137996				0.5475	0.00529826	0.00450354
0.547917	0.270667	0.214282			0.547917	0.120046	0.0138475				0.547917	0.00536154	0.00463333
0.548333	0.270467	0.214702			0.548333	0.121181	0.0138274				0.548333	0.00536906	0.00457082
0.54875	0.27036	0.215507			0.54875	0.121549	0.013704				0.54875	0.00533546	0.00465408
0.549167	0.270599	0.214975			0.549167	0.121118	0.013733				0.549167	0.00537244	0.00473784
0.549583	0.270953	0.214956			0.549583	0.120528	0.0138446				0.549583	0.00529199	0.00490642
0.55	0.27033	0.215765			0.55	0.12096	0.0137871				0.55	0.00542157	0.00435528
0.550417	0.270663	0.214169			0.550417	0.121705	0.0136211				0.550417	0.00535388	0.00477053
0.550833	0.271383	0.214833			0.550833	0.121548	0.0138102				0.550833	0.00550272	0.00436596
0.55125	0.27109	0.215345			0.55125	0.121398	0.0137536				0.55125	0.00539285	0.00460897
0.551667	0.270828	0.214968			0.551667	0.122201	0.0137035				0.551667	0.005455	0.00455641
0.552083	0.270458	0.215022			0.552083	0.123389	0.013705				0.552083	0.0054247	0.00455291
0.5525	0.269796	0.215544			0.5525	0.121226	0.0136658				0.5525	0.00542145	0.00453371
0.552917	0.270459	0.215262			0.552917	0.122097	0.0136966				0.552917	0.00536577	0.00472169
0.553333	0.27096	0.214621			0.553333	0.123504	0.0136768				0.553333	0.00533206	0.00453716
0.55375	0.270573	0.215069			0.55375	0.122653	0.0137603				0.55375	0.00547556	0.00456584
0.554167	0.271538	0.214355			0.554167	0.123965	0.0136966				0.554167	0.00527485	0.00501516
0.554583	0.27116	0.215788			0.554583	0.124757	0.0138082				0.554583	0.00540269	0.00459908
0.555	0.271996	0.215803			0.555	0.125398	0.0138211				0.555	0.00536314	0.00450606
0.555417	0.271291	0.215427			0.555417	0.123722	0.0137276				0.555417	0.0054225	0.00468833
0.555833	0.270784	0.215769			0.555833	0.123589	0.0135262				0.555833	0.00533771	0.00500247
0.55625	0.271312	0.215125			0.55625	0.124505	0.0134722				0.55625	0.00540764	0.00412309
0.556667	0.271595	0.215918			0.556667	0.1252	0.0135518				0.556667	0.0053999	0.00434131
0.557083	0.271713	0.215315			0.557083	0.125361	0.0135364				0.557083	0.0053938	0.00474357
0.5575	0.272416	0.214015			0.5575	0.127002	0.0136497				0.5575	0.00538905	0.00441143
0.557917	0.272331	0.215233			0.557917	0.127501	0.0135899				0.557917	0.00540936	0.00447997
0.558333	0.272183	0.214921			0.558333	0.126869	0.0135781				0.558333	0.00538798	0.00447273
0.55875	0.272307	0.215487			0.55875	0.126333	0.0135035				0.55875	0.00537531	0.00448064
0.559167	0.272412	0.215595			0.559167	0.128562	0.0135655				0.559167	0.00540249	0.00513263
0.559583	0.272607	0.215077			0.559583	0.129394	0.0134389				0.559583	0.0054097	0.00438534
0.56	0.272508	0.215193			0.56	0.128241	0.0134101				0.56	0.00535341	0.00429691
0.560417	0.272666	0.215975			0.560417	0.128556	0.0133858				0.560417	0.00531228	0.00450767
0.560833	0.272519	0.215894			0.560833	0.130711	0.0134607				0.560833	0.00535941	0.00459238
0.56125	0.27353	0.216759			0.56125	0.129545	0.013418				0.56125	0.00538827	0.00487603
0.561667	0.272535	0.215846			0.561667	0.128265	0.0133754				0.561667	0.00532946	0.00450026
0.562083	0.272503	0.216438			0.562083	0.128823	0.0134667				0.562083	0.00537747	0.0044537
0.5625	0.272182	0.216611			0.5625	0.129915	0.0133812				0.5625	0.0053406	0.00448123
0.562917	0.271758	0.21634			0.562917	0.128769	0.0135266				0.562917	0.00525759	0.00446462
0.563333	0.272485	0.216011			0.563333	0.130272	0.0135995				0.563333	0.00535484	0.00443252
0.56375	0.271795	0.216837			0.56375	0.128914	0.0134862				0.56375	0.00535705	0.00450136
0.564167	0.272271	0.215871			0.564167	0.130299	0.013416				0.564167	0.00522123	0.00452946
0.564583	0.272775	0.215947			0.564583	0.130106	0.0135008				0.564583	0.00537027	0.00445431
0.565	0.272656	0.216053			0.565	0.132144	0.0133515				0.565	0.00525222	0.00451368
0.565417	0.272359	0.216559			0.565417	0.132128	0.0133384				0.565417	0.00536107	0.00453998
0.565833	0.273001	0.215976			0.565833	0.13231	0.0133426				0.565833	0.00525434	0.00495494
0.56625	0.272638	0.215588			0.56625	0.132128	0.013198				0.56625	0.00535514	0.00424695
0.566667	0.273306	0.21625			0.566667	0.131659	0.0133007				0.566667	0.0052579	0.00466177
0.567083	0.273736	0.215814			0.567083	0.133543	0.0134392				0.567083	0.00526219	0.00445158
0.5675	0.274051	0.216196			0.5675	0.133672	0.0134822				0.5675	0.00537215	0.00436889
0.567917	0.273881	0.216447			0.567917	0.132761	0.0135717				0.567917	0.00531035	0.00510941
0.568333	0.274629	0.21718			0.568333	0.134524	0.013395				0.568333	0.00529029	0.00428354
0.56875	0.273645	0.216979			0.56875	0.134545	0.0133838				0.56875	0.00527616	0.00503668
0.569167	0.274142	0.216338			0.569167	0.135724	0.0134197				0.569167	0.00532487	0.00406932
0.569583	0.274572	0.217028			0.569583	0.136083	0.0133844				0.569583	0.00529748	0.00448982
0.57	0.274877	0.217618			0.57	0.136202	0.0133534				0.57	0.00536592	0.00472592
0.570417	0.273956	0.217209			0.570417	0.136411	0.0131778				0.570417	0.00525653	0.00483569
0.570833	0.27404	0.217316			0.570833	0.135824	0.0131908				0.570833	0.00532227	0.0043916
0.57125	0.273554	0.216301			0.57125	0.135512	0.0133116				0.57125	0.00525131	0.00428805
0.571667	0.275117	0.217022			0.571667	0.135017	0.0132185				0.571667	0.00536279	0.00435608
0.572083	0.275482	0.217157			0.572083	0.135654	0.0132379				0.572083	0.00528956	0.00465001
0.5725	0.275181	0.217761			0.5725	0.136259	0.0131431				0.5725	0.00536479	0.00496986
0.572917	0.275649	0.217538			0.572917	0.137858	0.0132213				0.572917	0.00529057	0.00434065
0.573333	0.275811	0.218273			0.573333	0.137034	0.0132558				0.573333	0.00535473	0.00424973
0.57375	0.275388	0.217047			0.57375	0.137431	0.0133647				0.57375	0.00523655	0.00438002
0.574167	0.275726	0.217259			0.574167	0.137796	0.013292				0.574167	0.00536328	0.00438985
0.574583	0.275756	0.217431			0.574583	0.139985	0.0133873				0.574583	0.00527954	0.00493961
0.575	0.276528	0.218081			0.575	0.138406	0.0133091				0.575	0.00523813	0.00433278
0.575417	0.276134	0.217338			0.575417	0.139866	0.0131954				0.575417	0.00536162	0.00426108
0.575833	0.275472	0.217309			0.575833	0.140157	0.0133254				0.575833	0.00527307	0.00441826
0.57625	0.276572	0.218282			0.57625	0.141625	0.0132511				0.57625	0.00528298	0.00440088
0.576667	0.276122	0.217563			0.576667	0.140274	0.0131981				0.576667	0.00528287	0.00442459
0.577083	0.27587	0.217539			0.577083	0.143451	0.0131888				0.577083	0.00530735	0.00440117
0.5775	0.276169	0.217481			0.5775	0.140828	0.0132284				0.5775	0.00528146	0.00506773
0.577917	0.275944	0.217593			0.577917	0.140009	0.0131364				0.577917	0.00534325	0.00435505
0.578333	0.276155	0.218246			0.578333	0.139927	0.013248				0.578333	0.00527744	0.00420124
0.57875	0.277282	0.219073			0.57875	0.140996	0.0133152				0.57875	0.00535703	0.00428845
0.579167	0.276362	0.218805			0.579167	0.141468	0.0131947				0.579167	0.00528176	0.00453087
0.579583	0.276468	0.219098			0.579583	0.141335	0.0132665				0.579583	0.00525427	0.00432782
0.58	0.276646	0.219065			0.58	0.14187	0.013325				0.58	0.00535351	0.0044047
0.580417	0.276778	0.219434			0.580417	0.141159	0.0131919				0.580417	0.00525763	0.00449311
0.580833	0.277778	0.219377			0.580833	0.140689	0.0131687				0.580833	0.00537543	0.00452172
0.58125	0.277821	0.220014			0.58125	0.142147	0.0132225				0.58125	0.00533298	0.00431326
0.581667	0.277327	0.220289			0.581667	0.143577	0.0133091				0.581667	0.00532799	0.00527847
0.582083	0.277374	0.219817			0.582083	0.142496	0.0131988				0.582083	0.00525074	0.00400664
0.5825	0.278381	0.219276			0.5825	0.142745	0.0132373				0.5825	0.00529627	0.00482071
0.582917	0.277967	0.218545			0.582917	0.143274	0.0133158				0.582917	0.00528946	0.00411334
0.583333	0.27853	0.218968			0.583333	0.141556	0.0132731				0.583333	0.00531591	0.00458131
0.58375	0.279131	0.219558			0.58375	0.143073	0.0132356				0.58375	0.00525777	0.00410101
0.584167	0.278748	0.219184			0.584167	0.143558	0.0132773				0.584167	0.00529832	0.00465104
0.584583	0.278959	0.220202			0.584583	0.146287	0.0132823				0.584583	0.00529401	0.00458038
0.585	0.27997	0.219218			0.585	0.145379	0.0132613				0.585	0.00528173	0.00408051
0.585417	0.280531	0.218339			0.585417	0.145037	0.0132751				0.585417	0.0053189	0.00429025
0.585833	0.279601	0.218294			0.585833	0.143146	0.0132813				0.585833	0.00525109	0.00501633
0.58625	0.280204	0.218874			0.58625	0.142548	0.0133656				0.58625	0.00533413	0.00394323
0.586667	0.280321	0.219833			0.586667	0.14347	0.0132007				0.586667	0.00526686	0.00455174
0.587083	0.280364	0.21937			0.587083	0.144992	0.0132181				0.587083	0.00533845	0.00441003
0.5875	0.280038	0.219476			0.5875	0.146071	0.0132363				0.5875	0.00523292	0.00433287
0.587917	0.279937	0.219499			0.587917	0.143971	0.0132536				0.587917	0.00535442	0.00443213
0.588333	0.280537	0.219757			0.588333	0.144816	0.0132236				0.588333	0.00521874	0.00424317
0.58875	0.280541	0.219801			0.58875	0.145685	0.0130887				0.58875	0.00533739	0.00431353
0.589167	0.280568	0.219944			0.589167	0.144875	0.013119				0.589167	0.00526612	0.00428306
0.589583	0.280773	0.219868			0.589583	0.144851	0.0131645				0.589583	0.00522273	0.00430497
0.59	0.281413	0.221341			0.59	0.144552	0.013153				0.59	0.00529332	0.0043148
0.590417	0.28033	0.22017			0.590417	0.14714	0.0131008				0.590417	0.00528672	0.00481393
0.590833	0.28084	0.220437			0.590833	0.148536	0.0130797				0.590833	0.00529593	0.00408423
0.59125	0.28095	0.220936			0.59125	0.147469	0.0130898				0.59125	0.00525707	0.00423202
0.591667	0.281391	0.220472			0.591667	0.146157	0.0130733				0.591667	0.00530352	0.00433785
0.592083	0.281302	0.220068			0.592083	0.147114	0.0131729				0.592083	0.00523927	0.00471585
0.5925	0.280729	0.219816			0.5925	0.14642	0.0130453				0.5925	0.0053348	0.00399187
0.592917	0.281269	0.221014			0.592917	0.146159	0.0131105				0.592917	0.00520237	0.00429505
0.593333	0.281654	0.221461			0.593333	0.146705	0.0130524				0.593333	0.00531768	0.00469988
0.59375	0.281815	0.220847			0.59375	0.147792	0.013005				0.59375	0.00519425	0.00418605
0.594167	0.281242	0.220343			0.594167	0.148047	0.0131268				0.594167	0.0053097	0.00484513
0.594583	0.281871	0.221092			0.594583	0.147228	0.0130153				0.594583	0.00520426	0.00393547
0.595	0.281435	0.222117			0.595	0.150432	0.01309				0.595	0.0052537	0.0046757
0.595417	0.282427	0.222462			0.595417	0.148074	0.0130865				0.595417	0.00524184	0.00402451
0.595833	0.282565	0.221291			0.595833	0.14532	0.0131277				0.595833	0.00526606	0.0041378
0.59625	0.282396	0.221346			0.59625	0.146952	0.0130943				0.59625	0.005347	0.00423607
0.596667	0.283085	0.221949			0.596667	0.146554	0.0130699				0.596667	0.0052044	0.00462538
0.597083	0.282755	0.222856			0.597083	0.148856	0.0131586				0.597083	0.00517736	0.00424715
0.5975	0.282571	0.222535			0.5975	0.149678	0.013093				0.5975	0.00532855	0.00395577
0.597917	0.282892	0.222421			0.597917	0.148149	0.0130293				0.597917	0.0052283	0.00500677
0.598333	0.283433	0.222979			0.598333	0.148914	0.0130418				0.598333	0.00529395	0.00401369
0.59875	0.283917	0.222766			0.59875	0.148935	0.0130801				0.59875	0.00531723	0.0041878
0.599167	0.28465	0.223093			0.599167	0.150183	0.0130709				0.599167	0.0052425	0.00477583
0.599583	0.284148	0.223806			0.599583	0.148894	0.0129536				0.599583	0.00523133	0.00398387
0.6	0.284286	0.22362			0.6	0.147704	0.0130042				0.6	0.00523195	0.00417626
0.600417	0.284407	0.223448			0.600417	0.148051	0.0129946				0.600417	0.0052715	0.00425827
0.600833	0.284075	0.223836			0.600833	0.151296	0.0130072				0.600833	0.00523683	0.00471926
0.60125	0.284428	0.222837			0.60125	0.148364	0.0131191				0.60125	0.0052019	0.00396105
0.601667	0.285413	0.224249			0.601667	0.148689	0.013172				0.601667	0.00530933	0.00414517
0.602083	0.285239	0.22335			0.602083	0.149518	0.0132662				0.602083	0.0052354	0.00469402
0.6025	0.285182	0.223481			0.6025	0.148746	0.0133195				0.6025	0.00525094	0.00402965
0.602917	0.285448	0.222926			0.602917	0.151086	0.0132609				0.602917	0.00520468	0.00403704
0.603333	0.285765	0.223534			0.603333	0.150456	0.0133366				0.603333	0.00525717	0.00416935
0.60375	0.285468	0.223857			0.60375	0.150275	0.0134426				0.60375	0.00527297	0.00421453
0.604167	0.285653	0.223119			0.604167	0.150118	0.0133288				0.604167	0.00520425	0.00425204
0.604583	0.28537	0.223613			0.604583	0.150903	0.0132948				0.604583	0.00520571	0.00418008
0.605	0.285022	0.223859			0.605	0.148587	0.0131181				0.605	0.00518341	0.00422266
0.605417	0.285271	0.224338			0.605417	0.149576	0.0128951				0.605417	0.00526755	0.00422806
0.605833	0.285387	0.224399			0.605833	0.150496	0.0129331				0.605833	0.00524865	0.00452774
0.60625	0.286063	0.225536			0.60625	0.15166	0.0130654				0.60625	0.00523053	0.00389881
0.606667	0.286318	0.225079			0.606667	0.149719	0.0131176				0.606667	0.00521218	0.00426829
0.607083	0.286236	0.225657			0.607083	0.151119	0.0131347				0.607083	0.00525975	0.00429381
0.6075	0.286514	0.22536			0.6075	0.149621	0.0131982				0.6075	0.00525146	0.00412688
0.607917	0.286821	0.22564			0.607917	0.150277	0.013029				0.607917	0.00522179	0.0041739
0.608333	0.286175	0.225757			0.608333	0.148894	0.0130964				0.608333	0.00524025	0.00508861
0.60875	0.286478	0.22458			0.60875	0.14922	0.0131984				0.60875	0.00523121	0.00418963
0.609167	0.286036	0.224886			0.609167	0.152635	0.0130204				0.609167	0.0052383	0.00380433
0.609583	0.28776	0.224371			0.609583	0.151385	0.0131174				0.609583	0.00524956	0.00438989
0.61	0.290799	0.225144			0.61	0.150369	0.0130058				0.61	0.00520474	0.00405575
0.610417	0.288471	0.225877			0.610417	0.151999	0.0128969				0.610417	0.00524682	0.00477225
0.610833	0.288596	0.224719			0.610833	0.152165	0.013025				0.610833	0.00528243	0.0037781
0.61125	0.289188	0.225424			0.61125	0.151879	0.0130614				0.61125	0.00525356	0.00473773
0.611667	0.288344	0.225529			0.611667	0.150972	0.0130097				0.611667	0.00528191	0.00387852
0.612083	0.288701	0.22602			0.612083	0.151597	0.0130295				0.612083	0.00516869	0.00410675
0.6125	0.28876	0.226197			0.6125	0.150523	0.0130952				0.6125	0.00524832	0.00415714
0.612917	0.289114	0.225889			0.612917	0.150477	0.0131776				0.612917	0.00522636	0.00482751
0.613333	0.289134	0.225829			0.613333	0.150959	0.0132125				0.613333	0.0052913	0.00369809
0.61375	0.288847	0.2262			0.61375	0.15095	0.0130617				0.61375	0.00520031	0.00420829
0.614167	0.289321	0.226196			0.614167	0.150066	0.0131716				0.614167	0.00527073	0.00411222
0.614583	0.29002	0.227114			0.614583	0.153994	0.0131831				0.614583	0.00519138	0.00475179
0.615	0.290027	0.227396			0.615	0.153241	0.0132529				0.615	0.00526076	0.00412872
0.615417	0.289889	0.226856			0.615417	0.151808	0.0131483				0.615417	0.00519918	0.00393348
0.615833	0.290026	0.227178			0.615833	0.151235	0.0131504				0.615833	0.00521907	0.00454517
0.61625	0.28962	0.227129			0.61625	0.150734	0.0129843				0.61625	0.00524526	0.00402455
0.616667	0.290519	0.226943			0.616667	0.151731	0.0130362				0.616667	0.00536605	0.00412965
0.617083	0.290541	0.228297			0.617083	0.153876	0.013085				0.617083	0.00537263	0.00392143
0.6175	0.290682	0.228			0.6175	0.153742	0.0130112				0.6175	0.00518805	0.00417734
0.617917	0.290889	0.228292			0.617917	0.153546	0.013116				0.617917	0.00527521	0.0042107
0.618333	0.291814	0.228739			0.618333	0.151903	0.0130851				0.618333	0.00523495	0.00398717
0.61875	0.291541	0.22895			0.61875	0.151956	0.0130665				0.61875	0.00521088	0.00418807
0.619167	0.292144	0.228411			0.619167	0.153322	0.0129329				0.619167	0.00517009	0.0040807
0.619583	0.292572	0.228398			0.619583	0.15288	0.0129787				0.619583	0.00526346	0.004099
0.62	0.292546	0.229006			0.62	0.15368	0.0129607				0.62	0.00520858	0.00400716
0.620417	0.29225	0.228971			0.620417	0.152622	0.0129668				0.620417	0.00521193	0.00451277
0.620833	0.292018	0.228363			0.620833	0.153175	0.0130147				0.620833	0.00523769	0.0044023
0.62125	0.291764	0.228183			0.62125	0.152752	0.0130583				0.62125	0.00528355	0.00388027
0.621667	0.292927	0.228978			0.621667	0.154452	0.0131126				0.621667	0.0051806	0.0039462
0.622083	0.292722	0.229052			0.622083	0.154516	0.0131257				0.622083	0.00521797	0.00402988
0.6225	0.292189	0.228754			0.6225	0.153429	0.0130842				0.6225	0.0051943	0.00403522
0.622917	0.29349	0.229155			0.622917	0.155905	0.0130991				0.622917	0.00524808	0.00408785
0.623333	0.293151	0.229416			0.623333	0.154093	0.0131553				0.623333	0.00523672	0.00406807
0.62375	0.293788	0.230498			0.62375	0.152527	0.0131419				0.62375	0.00524483	0.00405641
0.624167	0.295203	0.229062			0.624167	0.155204	0.0131155				0.624167	0.00524629	0.00424538
0.624583	0.294525	0.230131			0.624583	0.154924	0.0130368				0.624583	0.00519606	0.00404157
0.625	0.293788	0.230298			0.625	0.152964	0.0129186				0.625	0.00520299	0.00410417
0.625417	0.293427	0.231515			0.625417	0.1522	0.0130439				0.625417	0.00533401	0.00411363
0.625833	0.294136	0.231695			0.625833	0.151537	0.0130031				0.625833	0.0052698	0.0041305
0.62625	0.294565	0.230866			0.62625	0.153643	0.0131333				0.62625	0.00521795	0.00416731
0.626667	0.295323	0.231351			0.626667	0.154136	0.0130664				0.626667	0.00533223	0.00403012
0.627083	0.295132	0.231543			0.627083	0.155399	0.0130226				0.627083	0.00524839	0.00417112
0.6275	0.29523	0.23144			0.6275	0.156321	0.0129516				0.6275	0.00526748	0.0041235
0.627917	0.295666	0.231569			0.627917	0.156216	0.0130221				0.627917	0.00527352	0.00415799
0.628333	0.295736	0.232013			0.628333	0.156082	0.0130704				0.628333	0.00525001	0.00411206
0.62875	0.295785	0.230516			0.62875	0.155337	0.0130986				0.62875	0.00528972	0.00468997
0.629167	0.296027	0.231032			0.629167	0.155322	0.013055				0.629167	0.0052342	0.00373786
0.629583	0.295865	0.231806			0.629583	0.155355	0.0130083				0.629583	0.00525265	0.00425449
0.63	0.295277	0.232029			0.63	0.155828	0.0129745				0.63	0.00530081	0.00431297
0.630417	0.295642	0.231038			0.630417	0.154494	0.0130301				0.630417	0.00521787	0.00371039
0.630833	0.296221	0.231233			0.630833	0.153279	0.0129569				0.630833	0.00522275	0.0041953
0.63125	0.29549	0.230758			0.63125	0.155307	0.0128626				0.63125	0.00525244	0.00471423
0.631667	0.297205	0.231901			0.631667	0.154368	0.012902				0.631667	0.00531352	0.00403522
0.632083	0.297745	0.232834			0.632083	0.154644	0.0129808				0.632083	0.00523072	0.00398133
0.6325	0.297972	0.231954			0.6325	0.154351	0.0129887				0.6325	0.00523351	0.00426248
0.632917	0.297351	0.232221			0.632917	0.155173	0.0129222				0.632917	0.00521422	0.00418489
0.633333	0.297601	0.232725			0.633333	0.155441	0.0129046				0.633333	0.00524493	0.00377193
0.63375	0.298489	0.232634			0.63375	0.155667	0.01292				0.63375	0.00523177	0.0043064
0.634167	0.298039	0.233507			0.634167	0.157705	0.0129228				0.634167	0.00529374	0.00440766
0.634583	0.297854	0.233044			0.634583	0.155669	0.0128364				0.634583	0.00521794	0.00365938
0.635	0.29846	0.233049			0.635	0.155988	0.012957				0.635	0.00523869	0.00456606
0.635417	0.298645	0.232923			0.635417	0.155793	0.0129174				0.635417	0.00550357	0.00478483
0.635833	0.298835	0.23282			0.635833	0.15454	0.0128995				0.635833	0.00556545	0.00785028
0.63625	0.298576	0.233859			0.63625	0.156306	0.0130155				0.63625	0.00599451	0.012766
0.636667	0.299548	0.233343			0.636667	0.154466	0.0131804				0.636667	0.00762973	0.018129
0.637083	0.298949	0.233125			0.637083	0.156431	0.0129812				0.637083	0.00987837	0.0244547
0.6375	0.298377	0.233914			0.6375	0.157267	0.0129769				0.6375	0.0117696	0.0310518
0.637917	0.299524	0.233507			0.637917	0.156091	0.0130146				0.637917	0.0140427	0.0376044
0.638333	0.299852	0.233603			0.638333	0.156629	0.0130462				0.638333	0.016184	0.0443834
0.63875	0.30022	0.233504			0.63875	0.157299	0.0130844				0.63875	0.01853	0.051838
0.639167	0.301277	0.233536			0.639167	0.155983	0.0130565				0.639167	0.0205844	0.0587877
0.639583	0.300089	0.233202			0.639583	0.157087	0.0131172				0.639583	0.0227525	0.066465
0.64	0.300731	0.233182			0.64	0.157196	0.0130533				0.64	0.0249019	0.0732296
0.640417	0.300787	0.233825			0.640417	0.155822	0.0130031				0.640417	0.0270176	0.0797287
0.640833	0.302085	0.234747			0.640833	0.158346	0.013135				0.640833	0.0293917	0.0856954
0.64125	0.301285	0.23478			0.64125	0.15758	0.0130714				0.64125	0.031163	0.0924046
0.641667	0.301214	0.234824			0.641667	0.156475	0.0130181				0.641667	0.0332195	0.0988801
0.642083	0.301299	0.234549			0.642083	0.15682	0.013061				0.642083	0.0350938	0.10344
0.6425	0.30194	0.234995			0.6425	0.157832	0.0129743				0.6425	0.0371724	0.1099
0.642917	0.302418	0.234565			0.642917	0.156883	0.0130627				0.642917	0.03893	0.115696
0.643333	0.301966	0.235029			0.643333	0.156931	0.0130925				0.643333	0.0412121	0.121054
0.64375	0.301537	0.234596			0.64375	0.158452	0.0130552				0.64375	0.0430756	0.126837
0.644167	0.301604	0.23398			0.644167	0.157877	0.0129485				0.644167	0.0452785	0.13209
0.644583	0.301955	0.234465			0.644583	0.158695	0.0129117				0.644583	0.0471282	0.138746
0.645	0.301772	0.235025			0.645	0.156976	0.0130087				0.645	0.0489661	0.144071
0.645417	0.302737	0.235227			0.645417	0.159068	0.0130828				0.645417	0.0511176	0.151444
0.645833	0.303485	0.235723			0.645833	0.15698	0.0130779				0.645833	0.0532025	0.155177
0.64625	0.302319	0.234863			0.64625	0.158623	0.0130623				0.64625	0.0549947	0.159778
0.646667	0.303424	0.234828			0.646667	0.158486	0.0130681				0.646667	0.0576838	0.166457
0.647083	0.303443	0.2358			0.647083	0.15459	0.0129463				0.647083	0.0593076	0.172098
0.6475	0.30263	0.235747			0.6475	0.156053	0.0128863				0.6475	0.0608952	0.177028
0.647917	0.303167	0.236115			0.647917	0.157198	0.0130301				0.647917	0.0636654	0.18123
0.648333	0.303196	0.236808			0.648333	0.158688	0.0130467				0.648333	0.0652711	0.187692
0.64875	0.303667	0.236783			0.64875	0.158525	0.01297				0.64875	0.0672869	0.192865
0.649167	0.304217	0.236256			0.649167	0.160307	0.0129441				0.649167	0.0695952	0.196779
0.649583	0.304695	0.236904			0.649583	0.159543	0.0129824				0.649583	0.0715673	0.202623
0.65	0.30443	0.236321			0.65	0.157248	0.0129441				0.65	0.0732275	0.20665
0.650417	0.30493	0.237952			0.650417	0.155596	0.0129784				0.650417	0.075066	0.213204
0.650833	0.305131	0.238309			0.650833	0.15899	0.0129161				0.650833	0.076827	0.216205
0.65125	0.304714	0.238063			0.65125	0.15985	0.0129999				0.65125	0.079347	0.22223
0.651667	0.304478	0.237579			0.651667	0.160971	0.0129845				0.651667	0.0812162	0.227069
0.652083	0.30459	0.237506			0.652083	0.158369	0.0130341				0.652083	0.0825009	0.229863
0.6525	0.304695	0.237163			0.6525	0.159059	0.0129941				0.6525	0.083923	0.235604
0.652917	0.305011	0.237129			0.652917	0.159306	0.0129769				0.652917	0.086728	0.237419
0.653333	0.305668	0.237748			0.653333	0.159815	0.0130693				0.653333	0.0897755	0.242342
0.65375	0.306252	0.23828			0.65375	0.159159	0.0128934				0.65375	0.0905172	0.247585
0.654167	0.30709	0.238409			0.654167	0.159574	0.0129677				0.654167	0.0924397	0.251383
0.654583	0.306582	0.238957			0.654583	0.15864	0.0129847				0.654583	0.0951881	0.256266
0.655	0.30614	0.23876			0.655	0.157529	0.0129098				0.655	0.0963253	0.259301
0.655417	0.306192	0.238087			0.655417	0.156619	0.0128703				0.655417	0.0977914	0.263818
0.655833	0.307001	0.238542			0.655833	0.157366	0.0129734				0.655833	0.0995216	0.269131
0.65625	0.306807	0.238705			0.65625	0.159305	0.0130046				0.65625	0.102208	0.272683
0.656667	0.306501	0.23831			0.656667	0.159326	0.012976				0.656667	0.10445	0.278482
0.657083	0.307608	0.238938			0.657083	0.160136	0.0129946				0.657083	0.10525	0.27977
0.6575	0.307234	0.238524			0.6575	0.160279	0.0130695				0.6575	0.108545	0.284584
0.657917	0.307068	0.238412			0.657917	0.158664	0.013078				0.657917	0.109063	0.286842
0.658333	0.307933	0.239903			0.658333	0.158378	0.0129019				0.658333	0.110495	0.291064
0.65875	0.30771	0.23958			0.65875	0.158003	0.0129668				0.65875	0.112692	0.295383
0.659167	0.308479	0.238781			0.659167	0.161062	0.0129344				0.659167	0.113459	0.299671
0.659583	0.308302	0.240411			0.659583	0.161159	0.0130755				0.659583	0.116327	0.30063
0.66	0.307734	0.239988			0.66	0.159654	0.0129744				0.66	0.117769	0.303557
0.660417	0.308365	0.239298			0.660417	0.158482	0.0129426				0.660417	0.119248	0.309038
0.660833	0.308331	0.239656			0.660833	0.159659	0.0130967				0.660833	0.121191	0.314804
0.66125	0.307983	0.23993			0.66125	0.159115	0.0130843				0.66125	0.122569	0.318028
0.661667	0.308875	0.239526			0.661667	0.160608	0.0128962				0.661667	0.124398	0.323525
0.662083	0.308693	0.239978			0.662083	0.159289	0.0130077				0.662083	0.125444	0.325108
0.6625	0.308554	0.239978			0.6625	0.160497	0.0129719				0.6625	0.128055	0.326739
0.662917	0.308868	0.241075			0.662917	0.159661	0.0130146				0.662917	0.129301	0.33015
0.663333	0.309147	0.241012			0.663333	0.160275	0.012899				0.663333	0.131131	0.331099
0.66375	0.309046	0.240976			0.66375	0.160135	0.0129562				0.66375	0.132568	0.333916
0.664167	0.309165	0.241262			0.664167	0.160554	0.012966				0.664167	0.134419	0.338474
0.664583	0.3093	0.239764			0.664583	0.160741	0.0128979				0.664583	0.13518	0.34062
0.665	0.310197	0.2407			0.665	0.159705	0.0128782				0.665	0.137367	0.341524
0.665417	0.310083	0.241405			0.665417	0.159205	0.0129212				0.665417	0.138939	0.346858
0.665833	0.30972	0.242306			0.665833	0.162269	0.0128907				0.665833	0.140525	0.353388
0.66625	0.310431	0.242505			0.66625	0.159762	0.0128886				0.66625	0.143065	0.352908
0.666667	0.311063	0.241306			0.666667	0.15904	0.0129335				0.666667	0.144109	0.357507
0.667083	0.310258	0.242174			0.667083	0.159552	0.0129174				0.667083	0.144574	0.359143
0.6675	0.310322	0.241335			0.6675	0.159556	0.0128768				0.6675	0.146597	0.360311
0.667917	0.310517	0.24128			0.667917	0.159066	0.0128725				0.667917	0.147179	0.363951
0.668333	0.310045	0.241138			0.668333	0.160893	0.0129435				0.668333	0.150813	0.368618
0.66875	0.310708	0.242246			0.66875	0.159907	0.0129565				0.66875	0.150655	0.367697
0.669167	0.311492	0.242505			0.669167	0.15979	0.012947				0.669167	0.152645	0.369757
0.669583	0.310897	0.242387			0.669583	0.160681	0.0130442				0.669583	0.154512	0.369604
0.67	0.310907	0.242759			0.67	0.161042	0.0129894				0.67	0.155699	0.373653
0.670417	0.311231	0.242811			0.670417	0.160709	0.0129673				0.670417	0.157545	0.373983
0.670833	0.311561	0.241809			0.670833	0.160804	0.0130437				0.670833	0.158335	0.371339
0.67125	0.312349	0.242526			0.67125	0.16172	0.0128639				0.67125	0.16074	0.379571
0.671667	0.311736	0.24309			0.671667	0.162274	0.0129539				0.671667	0.161315	0.380528
0.672083	0.311653	0.242627			0.672083	0.162462	0.0129812				0.672083	0.162217	0.384919
0.6725	0.312042	0.242745			0.6725	0.161781	0.0130258				0.6725	0.165321	0.388856
0.672917	0.312093	0.242734			0.672917	0.162253	0.0129786				0.672917	0.167052	0.392226
0.673333	0.31152	0.242555			0.673333	0.16101	0.0129778				0.673333	0.168423	0.396528
0.67375	0.311668	0.24217			0.67375	0.160605	0.0129098				0.67375	0.170537	0.396527
0.674167	0.312133	0.243874			0.674167	0.162538	0.0129949				0.674167	0.171799	0.398664
0.674583	0.311309	0.242989			0.674583	0.162229	0.0130496				0.674583	0.172291	0.398428
0.675	0.311783	0.243674			0.675	0.159785	0.013016				0.675	0.173617	0.401606
0.675417	0.312961	0.243525			0.675417	0.160047	0.0130954				0.675417	0.17574	0.403282
0.675833	0.313667	0.244134			0.675833	0.161575	0.0131224				0.675833	0.175593	0.407662
0.67625	0.313642	0.243986			0.67625	0.161619	0.0130395				0.67625	0.176637	0.411426
0.676667	0.313577	0.243963			0.676667	0.162435	0.0130054				0.676667	0.179019	0.414561
0.677083	0.313961	0.244168			0.677083	0.16121	0.013013				0.677083	0.181519	0.415462
0.6775	0.312786	0.2446			0.6775	0.161915	0.013122				0.6775	0.182305	0.419992
0.677917	0.313667	0.243723			0.677917	0.162121	0.0131485				0.677917	0.183094	0.414422
0.678333	0.313681	0.243213			0.678333	0.161753	0.0130584				0.678333	0.18489	0.419123
0.67875	0.313932	0.243752			0.67875	0.161711	0.0130314				0.67875	0.186008	0.427959
0.679167	0.314281	0.24443			0.679167	0.160206	0.0130184				0.679167	0.187718	0.430498
0.679583	0.313994	0.245365			0.679583	0.160602	0.0131609				0.679583	0.188021	0.433515
0.68	0.314708	0.245211			0.68	0.15937	0.0131116				0.68	0.188169	0.434377
0.680417	0.315284	0.244293			0.680417	0.158654	0.0130677				0.680417	0.190326	0.437986
0.680833	0.317845	0.245302			0.680833	0.159916	0.0131179				0.680833	0.19098	0.442525
0.68125	0.315982	0.245555			0.68125	0.161051	0.0130865				0.68125	0.193012	0.442137
0.681667	0.316082	0.246636			0.681667	0.160828	0.0131222				0.681667	0.195548	0.443197
0.682083	0.315995	0.246006			0.682083	0.163445	0.0130231				0.682083	0.195858	0.44794
0.6825	0.31507	0.245691			0.6825	0.163376	0.0130398				0.6825	0.19582	0.449571
0.682917	0.31545	0.246166			0.682917	0.161672	0.0129584				0.682917	0.198735	0.453192
0.683333	0.31518	0.246529			0.683333	0.16273	0.0129985				0.683333	0.199882	0.451318
0.68375	0.315504	0.246398			0.68375	0.162532	0.0129383				0.68375	0.200178	0.452957
0.684167	0.315405	0.245915			0.684167	0.160801	0.0128811				0.684167	0.200446	0.457336
0.684583	0.316687	0.246065			0.684583	0.162064	0.0129164				0.684583	0.201638	0.462619
0.685	0.315945	0.246144			0.685	0.161032	0.0129785				0.685	0.200544	0.462168
0.685417	0.31696	0.24605			0.685417	0.164495	0.0130142				0.685417	0.202857	0.463587
0.685833	0.317381	0.246944			0.685833	0.16288	0.0129802				0.685833	0.203651	0.465867
0.68625	0.31697	0.246056			0.68625	0.161898	0.0130079				0.68625	0.204317	0.468483
0.686667	0.317133	0.246506			0.686667	0.160992	0.012968				0.686667	0.204762	0.464776
0.687083	0.318533	0.24644			0.687083	0.162275	0.0128832				0.687083	0.205068	0.469451
0.6875	0.3182	0.246833			0.6875	0.162466	0.0129593				0.6875	0.204816	0.467008
0.687917	0.31834	0.246158			0.687917	0.162716	0.0129878				0.687917	0.204369	0.471334
0.688333	0.318509	0.246578			0.688333	0.163349	0.0129444				0.688333	0.203282	0.467812
0.68875	0.318105	0.246018			0.68875	0.162778	0.0130201				0.68875	0.207066	0.470476
0.689167	0.319138	0.246956			0.689167	0.163767	0.013041				0.689167	0.205713	0.471889
0.689583	0.319086	0.247923			0.689583	0.16444	0.012904				0.689583	0.204563	0.46932
0.69	0.318595	0.249064			0.69	0.163571	0.0129308				0.69	0.203082	0.466621
0.690417	0.319397	0.24892			0.690417	0.161412	0.0129763				0.690417	0.203624	0.466622
0.690833	0.319821	0.248268			0.690833	0.162368	0.01304				0.690833	0.204304	0.467121
0.69125	0.319532	0.247929			0.69125	0.163726	0.0130669				0.69125	0.203107	0.46389
0.691667	0.320364	0.248764			0.691667	0.16334	0.0129982				0.691667	0.203385	0.466864
0.692083	0.319939	0.248529			0.692083	0.164367	0.013022				0.692083	0.203082	0.463436
0.6925	0.319522	0.248382			0.6925	0.162713	0.0129808				0.6925	0.204418	0.460472
0.692917	0.320955	0.247758			0.692917	0.161964	0.0129366				0.692917	0.203576	0.458555
0.693333	0.320205	0.248603			0.693333	0.164745	0.0128642				0.693333	0.203172	0.45508
0.69375	0.320375	0.249122			0.69375	0.16331	0.0129986				0.69375	0.20224	0.454761
0.694167	0.320086	0.24938			0.694167	0.163586	0.0130052				0.694167	0.202119	0.455481
0.694583	0.320677	0.249217			0.694583	0.162742	0.0129536				0.694583	0.20058	0.459187
0.695	0.320499	0.248712			0.695	0.162116	0.0129909				0.695	0.199565	0.451895
0.695417	0.320899	0.249437			0.695417	0.163233	0.0129717				0.695417	0.202822	0.454203
0.695833	0.321971	0.249128			0.695833	0.162694	0.013056				0.695833	0.200031	0.451433
0.69625	0.321099	0.249884			0.69625	0.163495	0.0130566				0.69625	0.199917	0.445486
0.696667	0.321658	0.249679			0.696667	0.164895	0.0130553				0.696667	0.19799	0.447984
0.697083	0.32127	0.249618			0.697083	0.163883	0.0130908				0.697083	0.19769	0.442853
0.6975	0.321097	0.249472			0.6975	0.163991	0.0130242				0.6975	0.197893	0.439885
0.697917	0.32198	0.249429			0.697917	0.162549	0.0128727				0.697917	0.197192	0.438759
0.698333	0.322201	0.250803			0.698333	0.163015	0.0128572				0.698333	0.196874	0.438841
0.69875	0.32233	0.250877			0.69875	0.1637	0.0128894				0.69875	0.196931	0.437254
0.699167	0.322552	0.25032			0.699167	0.162354	0.0129762				0.699167	0.197125	0.441682
0.699583	0.321934	0.251166			0.699583	0.163292	0.0130535				0.699583	0.195859	0.436842
0.7	0.321543	0.250741			0.7	0.164446	0.0130129				0.7	0.195602	0.432947
0.700417	0.322682	0.250811			0.700417	0.163622	0.01298				0.700417	0.195703	0.429118
0.700833	0.322351	0.251066			0.700833	0.165579	0.0129466				0.700833	0.194243	0.42625
0.70125	0.322106	0.250609			0.70125	0.16523	0.012895				0.70125	0.194532	0.426629
0.701667	0.323045	0.251217			0.701667	0.165203	0.0130051				0.701667	0.19369	0.424006
0.702083	0.323324	0.251345			0.702083	0.164883	0.0128878				0.702083	0.192582	0.417797
0.7025	0.324236	0.251236			0.7025	0.162329	0.0130569				0.7025	0.19478	0.416948
0.702917	0.324068	0.25052			0.702917	0.16457	0.0130676				0.702917	0.193932	0.415814
0.703333	0.323717	0.251174			0.703333	0.166374	0.0129664				0.703333	0.192074	0.410589
0.70375	0.323289	0.250314			0.70375	0.164499	0.0130387				0.70375	0.191923	0.411336
0.704167	0.323669	0.250698			0.704167	0.164082	0.0130445				0.704167	0.191187	0.407333
0.704583	0.324556	0.251297			0.704583	0.162439	0.0130048				0.704583	0.190911	0.40523
0.705	0.324408	0.251545			0.705	0.164004	0.0130425				0.705	0.190657	0.398338
0.705417	0.32498	0.251773			0.705417	0.164439	0.0129577				0.705417	0.190549	0.397298
0.705833	0.324614	0.251411			0.705833	0.16381	0.0130205				0.705833	0.191315	0.399467
0.70625	0.324241	0.251484			0.70625	0.164299	0.013027				0.70625	0.189595	0.393658
0.706667	0.32459	0.251791			0.706667	0.163851	0.0130387				0.706667	0.188162	0.390805
0.707083	0.32455	0.252573			0.707083	0.165024	0.0129804				0.707083	0.188315	0.38699
0.7075	0.32384	0.25234			0.7075	0.163669	0.0128685				0.7075	0.185998	0.389617
0.707917	0.325049	0.252402			0.707917	0.163002	0.0129153				0.707917	0.185836	0.38532
0.708333	0.325153	0.25194			0.708333	0.164352	0.0129217				0.708333	0.186717	0.383101
0.70875	0.325427	0.252006			0.70875	0.163929	0.0129918				0.70875	0.186354	0.381748
0.709167	0.325222	0.252756			0.709167	0.165166	0.0128896				0.709167	0.185652	0.380239
0.709583	0.325269	0.252907			0.709583	0.164779	0.0130595				0.709583	0.187469	0.376569
0.71	0.325325	0.252753			0.71	0.163215	0.0130136				0.71	0.187487	0.372363
0.710417	0.326823	0.252562			0.710417	0.163337	0.0130053				0.710417	0.184816	0.372163
0.710833	0.327024	0.253385			0.710833	0.163699	0.012962				0.710833	0.18425	0.366276
0.71125	0.326791	0.25291			0.71125	0.165272	0.0129421				0.71125	0.185153	0.368975
0.711667	0.327101	0.252795			0.711667	0.165494	0.0129382				0.711667	0.18375	0.364773
0.712083	0.326261	0.253495			0.712083	0.16435	0.0129542				0.712083	0.183744	0.358885
0.7125	0.326938	0.253277			0.7125	0.163249	0.0129157				0.7125	0.183312	0.358574
0.712917	0.327716	0.254211			0.712917	0.164762	0.0130174				0.712917	0.182651	0.356759
0.713333	0.327308	0.25465			0.713333	0.163733	0.0129111				0.713333	0.181604	0.350319
0.71375	0.328565	0.254248			0.71375	0.163554	0.0128665				0.71375	0.18256	0.354234
0.714167	0.328189	0.254268			0.714167	0.165021	0.0128798				0.714167	0.182565	0.35178
0.714583	0.327307	0.253477			0.714583	0.163885	0.0129048				0.714583	0.181145	0.345975
0.715	0.327306	0.253621			0.715	0.164475	0.0127489				0.715	0.17929	0.346754
0.715417	0.327311	0.253578			0.715417	0.164978	0.012889				0.715417	0.180862	0.345467
0.715833	0.327776	0.25434			0.715833	0.164556	0.0129603				0.715833	0.181439	0.342034
0.71625	0.327599	0.254712			0.71625	0.163712	0.0129389				0.71625	0.180829	0.340057
0.716667	0.327409	0.254701			0.716667	0.162661	0.0129297				0.716667	0.178504	0.338111
0.717083	0.327616	0.254783			0.717083	0.164208	0.0128469				0.717083	0.178229	0.332732
0.7175	0.327705	0.254709			0.7175	0.165646	0.0129482				0.7175	0.179534	0.328995
0.717917	0.328393	0.253681			0.717917	0.164745	0.012925				0.717917	0.179685	0.329176
0.718333	0.328549	0.254221			0.718333	0.163663	0.0129061				0.718333	0.177235	0.326139
0.71875	0.328468	0.254735			0.71875	0.164313	0.0128936				0.71875	0.17602	0.322578
0.719167	0.327761	0.254864			0.719167	0.164594	0.0129081				0.719167	0.176829	0.322996
0.719583	0.328441	0.256541			0.719583	0.16573	0.0129525				0.719583	0.177422	0.319641
0.72	0.328399	0.256385			0.72	0.165391	0.0128942				0.72	0.176795	0.318553
0.720417	0.329299	0.256035			0.720417	0.164716	0.0129926				0.720417	0.176653	0.313112
0.720833	0.32929	0.256131			0.720833	0.164214	0.0129777				0.720833	0.175968	0.313352
0.72125	0.328686	0.256331			0.72125	0.164019	0.0129465				0.72125	0.174692	0.309653
0.721667	0.329508	0.256028			0.721667	0.16488	0.0128748				0.721667	0.176098	0.31032
0.722083	0.33002	0.256166			0.722083	0.164633	0.0128808				0.722083	0.176429	0.308338
0.7225	0.329934	0.255888			0.7225	0.165595	0.012841				0.7225	0.175131	0.304137
0.722917	0.330124	0.25541			0.722917	0.164956	0.0129184				0.722917	0.174233	0.300339
0.723333	0.330184	0.255742			0.723333	0.165061	0.0129514				0.723333	0.173693	0.303983
0.72375	0.329562	0.256376			0.72375	0.165715	0.0129538				0.72375	0.173405	0.300747
0.724167	0.329961	0.256216			0.724167	0.166172	0.0128148				0.724167	0.173248	0.295288
0.724583	0.330136	0.25696			0.724583	0.164916	0.0129422				0.724583	0.173699	0.293998
0.725	0.329842	0.256772			0.725	0.164781	0.0129594				0.725	0.172205	0.292292
0.725417	0.330612	0.257648			0.725417	0.164412	0.0128875				0.725417	0.172239	0.293213
0.725833	0.33092	0.257892			0.725833	0.163303	0.0129237				0.725833	0.172442	0.290089
0.72625	0.331459	0.258313			0.72625	0.164198	0.0128648				0.72625	0.171782	0.285103
0.726667	0.331726	0.257739			0.726667	0.164728	0.0128449				0.726667	0.172279	0.286516
0.727083	0.331645	0.257586			0.727083	0.164128	0.0129272				0.727083	0.172432	0.284861
0.7275	0.332115	0.257686			0.7275	0.165146	0.0129285				0.7275	0.171022	0.279308
0.727917	0.332557	0.25848			0.727917	0.165004	0.0129576				0.727917	0.170676	0.27893
0.728333	0.332846	0.258516			0.728333	0.164616	0.0129633				0.728333	0.171688	0.277505
0.72875	0.332934	0.258206			0.72875	0.165601	0.012962				0.72875	0.169663	0.278271
0.729167	0.334028	0.25763			0.729167	0.165981	0.0129636				0.729167	0.170622	0.271778
0.729583	0.333508	0.25787			0.729583	0.163446	0.0129394				0.729583	0.16997	0.273555
0.73	0.333242	0.258726			0.73	0.162721	0.012913				0.73	0.16851	0.27517
0.730417	0.33358	0.257736			0.730417	0.166499	0.0128512				0.730417	0.170448	0.269232
0.730833	0.333469	0.258654			0.730833	0.166695	0.0128946				0.730833	0.171227	0.268205
0.73125	0.333366	0.259166			0.73125	0.16434	0.012858				0.73125	0.169978	0.266903
0.731667	0.334008	0.259617			0.731667	0.163535	0.0127587				0.731667	0.169458	0.26363
0.732083	0.334022	0.259291			0.732083	0.165579	0.0129172				0.732083	0.170408	0.264303
0.7325	0.333601	0.25915			0.7325	0.16526	0.012875				0.7325	0.169181	0.262704
0.732917	0.333783	0.259964			0.732917	0.163577	0.0129203				0.732917	0.168753	0.260335
0.733333	0.333826	0.260678			0.733333	0.164917	0.0128806				0.733333	0.170048	0.258698
0.73375	0.333468	0.260153			0.73375	0.165577	0.012933				0.73375	0.169324	0.258531
0.734167	0.33483	0.260008			0.734167	0.165533	0.0129055				0.734167	0.169032	0.256083
0.734583	0.334942	0.260475			0.734583	0.165604	0.0128773				0.734583	0.168593	0.256154
0.735	0.334989	0.260872			0.735	0.166483	0.0128689				0.735	0.169977	0.25342
0.735417	0.335784	0.260673			0.735417	0.1641	0.0128737				0.735417	0.168953	0.252619
0.735833	0.335787	0.261185			0.735833	0.164227	0.0129092				0.735833	0.166866	0.24992
0.73625	0.336245	0.261402			0.73625	0.165028	0.0128855				0.73625	0.167078	0.248401
0.736667	0.336433	0.261135			0.736667	0.166671	0.0128564				0.736667	0.167033	0.24865
0.737083	0.335973	0.260527			0.737083	0.165014	0.0128765				0.737083	0.168254	0.245462
0.7375	0.336765	0.2617			0.7375	0.165927	0.0127758				0.7375	0.167681	0.244716
0.737917	0.336258	0.261565			0.737917	0.166513	0.012734				0.737917	0.167575	0.241923
0.738333	0.335735	0.260582			0.738333	0.165377	0.0127979				0.738333	0.167186	0.241055
0.73875	0.337293	0.260401			0.73875	0.164294	0.0130164				0.73875	0.168903	0.241072
0.739167	0.33695	0.261909			0.739167	0.16651	0.0129322				0.739167	0.165626	0.241726
0.739583	0.33712	0.262314			0.739583	0.165925	0.0128444				0.739583	0.167787	0.240123
0.74	0.337322	0.261961			0.74	0.165939	0.0128327				0.74	0.167131	0.238425
0.740417	0.337383	0.262798			0.740417	0.16408	0.0127518				0.740417	0.166478	0.235734
0.740833	0.337373	0.263385			0.740833	0.166291	0.0127885				0.740833	0.16572	0.235614
0.74125	0.337867	0.262847			0.74125	0.167159	0.0128974				0.74125	0.165497	0.234092
0.741667	0.337804	0.263565			0.741667	0.165904	0.0128219				0.741667	0.166608	0.232319
0.742083	0.337962	0.263586			0.742083	0.166252	0.0128046				0.742083	0.167518	0.233672
0.7425	0.338866	0.264459			0.7425	0.165524	0.0128855				0.7425	0.165077	0.231429
0.742917	0.339403	0.26503			0.742917	0.164957	0.0129802				0.742917	0.164671	0.230328
0.743333	0.340049	0.263717			0.743333	0.163478	0.012819				0.743333	0.164333	0.229159
0.74375	0.340157	0.263734			0.74375	0.166978	0.0128824				0.74375	0.165737	0.227655
0.744167	0.339652	0.263668			0.744167	0.167104	0.0128732				0.744167	0.165622	0.22596
0.744583	0.339856	0.263831			0.744583	0.166644	0.0128448				0.744583	0.166008	0.224607
0.745	0.340455	0.264777			0.745	0.168819	0.0128483				0.745	0.16487	0.225935
0.745417	0.340155	0.264925			0.745417	0.167781	0.0127963				0.745417	0.16368	0.223906
0.745833	0.34015	0.264963			0.745833	0.16685	0.0129122				0.745833	0.163667	0.22245
0.74625	0.340002	0.26485			0.74625	0.166949	0.0129709				0.74625	0.164437	0.224027
0.746667	0.3399	0.264728			0.746667	0.167112	0.0128924				0.746667	0.163894	0.223104
0.747083	0.341438	0.264253			0.747083	0.16894	0.0127972				0.747083	0.163807	0.220383
0.7475	0.341646	0.26417			0.7475	0.165252	0.012913				0.7475	0.163171	0.219465
0.747917	0.340668	0.265101			0.747917	0.167241	0.0129467				0.747917	0.163546	0.218264
0.748333	0.342054	0.265409			0.748333	0.16729	0.0129921				0.748333	0.164273	0.217421
0.74875	0.342019	0.265824			0.74875	0.16764	0.0128961				0.74875	0.163301	0.215884
0.749167	0.341556	0.266031			0.749167	0.168577	0.0128915				0.749167	0.161218	0.213548
0.749583	0.342563	0.265471			0.749583	0.16611	0.0129015				0.749583	0.161567	0.212579
0.75	0.342318	0.266937			0.75	0.165588	0.0128185				0.75	0.163442	0.212811
0.750417	0.34227	0.265431			0.750417	0.167067	0.012774				0.750417	0.162557	0.21112
0.750833	0.343305	0.265695			0.750833	0.165946	0.0129059				0.750833	0.164947	0.209754
0.75125	0.342418	0.265927			0.75125	0.16581	0.0128178				0.75125	0.163754	0.208116
0.751667	0.342842	0.266929			0.751667	0.167932	0.0129099				0.751667	0.164205	0.2077
0.752083	0.343267	0.266761			0.752083	0.167525	0.012768				0.752083	0.162781	0.206877
0.7525	0.34376	0.268013			0.7525	0.164176	0.0127431				0.7525	0.162098	0.208421
0.752917	0.343775	0.26828			0.752917	0.165267	0.0128974				0.752917	0.162391	0.205816
0.753333	0.344702	0.268156			0.753333	0.16388	0.0129412				0.753333	0.162444	0.205113
0.75375	0.344664	0.267699			0.75375	0.166047	0.0128767				0.75375	0.160608	0.203483
0.754167	0.345579	0.267925			0.754167	0.166214	0.0128943				0.754167	0.162927	0.203695
0.754583	0.345768	0.268255			0.754583	0.165947	0.0128802				0.754583	0.162685	0.20252
0.755	0.34582	0.267783			0.755	0.166937	0.0129362				0.755	0.163627	0.200014
0.755417	0.345749	0.268185			0.755417	0.166136	0.0128799				0.755417	0.161268	0.201129
0.755833	0.345233	0.269289			0.755833	0.165407	0.0128415				0.755833	0.16219	0.199876
0.75625	0.346596	0.268019			0.75625	0.16599	0.0128251				0.75625	0.163543	0.198961
0.756667	0.346632	0.267905			0.756667	0.167528	0.0128217				0.756667	0.162437	0.200869
0.757083	0.346213	0.268819			0.757083	0.167456	0.0128696				0.757083	0.160432	0.198199
0.7575	0.347025	0.268336			0.7575	0.167232	0.0128052				0.7575	0.160996	0.198141
0.757917	0.347161	0.268724			0.757917	0.165618	0.012815				0.757917	0.160536	0.195925
0.758333	0.347072	0.268913			0.758333	0.165925	0.0128581				0.758333	0.160376	0.193748
0.75875	0.347314	0.26873			0.75875	0.167299	0.0128729				0.75875	0.160451	0.194112
0.759167	0.347072	0.269299			0.759167	0.16549	0.0128477				0.759167	0.160468	0.193145
0.759583	0.347079	0.269633			0.759583	0.166455	0.012869				0.759583	0.159621	0.193117
0.76	0.348181	0.269602			0.76	0.165791	0.0128824				0.76	0.160888	0.191871
0.760417	0.347885	0.270607			0.760417	0.166372	0.0128603				0.760417	0.161555	0.19159
0.760833	0.347275	0.270588			0.760833	0.167452	0.0128749				0.760833	0.16024	0.191315
0.76125	0.348977	0.27026			0.76125	0.167081	0.0128069				0.76125	0.158674	0.190891
0.761667	0.348135	0.270484			0.761667	0.167825	0.0128108				0.761667	0.161257	0.189473
0.762083	0.348234	0.270693			0.762083	0.167455	0.0128271				0.762083	0.159667	0.189891
0.7625	0.349031	0.270853			0.7625	0.167238	0.0127688				0.7625	0.159688	0.18901
0.762917	0.348712	0.271302			0.762917	0.166283	0.0128237				0.762917	0.159819	0.189824
0.763333	0.349314	0.271938			0.763333	0.166914	0.0127885				0.763333	0.159824	0.187326
0.76375	0.350717	0.271874			0.76375	0.166122	0.0128084				0.76375	0.16035	0.186832
0.764167	0.350771	0.270737			0.764167	0.165119	0.0128262				0.764167	0.158215	0.1858
0.764583	0.351197	0.271334			0.764583	0.166482	0.0129314				0.764583	0.15939	0.187068
0.765	0.35053	0.271537			0.765	0.166721	0.0129712				0.765	0.159292	0.186111
0.765417	0.350248	0.272283			0.765417	0.167823	0.0127549				0.765417	0.159282	0.184113
0.765833	0.35227	0.271528			0.765833	0.166724	0.0128008				0.765833	0.15851	0.182043
0.76625	0.351757	0.272225			0.76625	0.166626	0.0127531				0.76625	0.158285	0.183429
0.766667	0.351609	0.272609			0.766667	0.166183	0.0127642				0.766667	0.158045	0.182955
0.767083	0.353277	0.272714			0.767083	0.165228	0.0127351				0.767083	0.159559	0.181721
0.7675	0.352715	0.273205			0.7675	0.167768	0.0129531				0.7675	0.157984	0.17968
0.767917	0.352127	0.272766			0.767917	0.165556	0.0129171				0.767917	0.158682	0.180509
0.768333	0.352993	0.273356			0.768333	0.167153	0.0128144				0.768333	0.158049	0.179788
0.76875	0.352713	0.27343			0.76875	0.167326	0.0128879				0.76875	0.159092	0.178593
0.769167	0.352142	0.273172			0.769167	0.166724	0.0128214				0.769167	0.158526	0.178375
0.769583	0.352984	0.273893			0.769583	0.166912	0.0128271				0.769583	0.158421	0.180056
0.77	0.35266	0.273927			0.77	0.16595	0.0128139				0.77	0.157398	0.178047
0.770417	0.353187	0.273612			0.770417	0.167065	0.0128296				0.770417	0.158253	0.176238
0.770833	0.35333	0.273721			0.770833	0.167063	0.0128581				0.770833	0.156926	0.177691
0.77125	0.353687	0.27368			0.77125	0.166726	0.0127712				0.77125	0.157253	0.176199
0.771667	0.353177	0.2745			0.771667	0.165968	0.0127507				0.771667	0.158451	0.175469
0.772083	0.354237	0.274689			0.772083	0.168365	0.0127803				0.772083	0.157003	0.176516
0.7725	0.354958	0.274168			0.7725	0.165663	0.0126233				0.7725	0.157251	0.175203
0.772917	0.355058	0.27481			0.772917	0.164872	0.0127345				0.772917	0.157006	0.173841
0.773333	0.355052	0.274564			0.773333	0.16617	0.0128571				0.773333	0.158552	0.173924
0.77375	0.355606	0.27447			0.77375	0.166659	0.012727				0.77375	0.158275	0.173079
0.774167	0.355764	0.276199			0.774167	0.166212	0.0127993				0.774167	0.156172	0.173269
0.774583	0.357943	0.275848			0.774583	0.16688	0.0127684				0.774583	0.157011	0.172336
0.775	0.358964	0.275427			0.775	0.167232	0.0128277				0.775	0.157149	0.172448
0.775417	0.357481	0.275289			0.775417	0.167327	0.0128544				0.775417	0.155385	0.173489
0.775833	0.357951	0.275069			0.775833	0.166063	0.0128397				0.775833	0.157529	0.172373
0.77625	0.358621	0.275137			0.77625	0.169062	0.012823				0.77625	0.154471	0.172862
0.776667	0.357221	0.276468			0.776667	0.168362	0.012802				0.776667	0.156723	0.1717
0.777083	0.356636	0.275685			0.777083	0.167205	0.0126858				0.777083	0.155739	0.172592
0.7775	0.359318	0.276523			0.7775	0.16846	0.0127289				0.7775	0.156068	0.170119
0.777917	0.358466	0.276738			0.777917	0.1678	0.0126985				0.777917	0.156349	0.170569
0.778333	0.358127	0.276909			0.778333	0.167387	0.0128304				0.778333	0.156209	0.170103
0.77875	0.359128	0.276613			0.77875	0.165897	0.0128277				0.77875	0.155624	0.169359
0.779167	0.359323	0.277765			0.779167	0.168797	0.0128892				0.779167	0.1565	0.168367
0.779583	0.359696	0.277039			0.779583	0.16686	0.0130537				0.779583	0.155366	0.169771
0.78	0.360294	0.277446			0.78	0.166508	0.0129909				0.78	0.156175	0.169206
0.780417	0.36118	0.277536			0.780417	0.165628	0.0129616				0.780417	0.155091	0.16789
0.780833	0.360905	0.277056			0.780833	0.167749	0.0129785				0.780833	0.155334	0.166617
0.78125	0.36152	0.277186			0.78125	0.168966	0.0130169				0.78125	0.155978	0.166836
0.781667	0.361228	0.278325			0.781667	0.16666	0.0130219				0.781667	0.155894	0.165863
0.782083	0.361443	0.278134			0.782083	0.167554	0.0127901				0.782083	0.155251	0.166007
0.7825	0.361669	0.279997			0.7825	0.168324	0.0129685				0.7825	0.155272	0.165721
0.782917	0.362235	0.279055			0.782917	0.168553	0.0130552				0.782917	0.153805	0.164016
0.783333	0.361554	0.278929			0.783333	0.165759	0.0130328				0.783333	0.153466	0.164627
0.78375	0.361887	0.279565			0.78375	0.167941	0.0129747				0.78375	0.154583	0.164394
0.784167	0.362065	0.279541			0.784167	0.167273	0.0128931				0.784167	0.155761	0.162617
0.784583	0.363211	0.279006			0.784583	0.16664	0.012925				0.784583	0.156301	0.163316
0.785	0.362779	0.279651			0.785	0.167337	0.0130021				0.785	0.155908	0.162408
0.785417	0.36242	0.279726			0.785417	0.167575	0.0128139				0.785417	0.154072	0.16178
0.785833	0.363124	0.279762			0.785833	0.167767	0.0129546				0.785833	0.154467	0.162963
0.78625	0.363197	0.280063			0.78625	0.168367	0.0130358				0.78625	0.153594	0.160768
0.786667	0.363562	0.279832			0.786667	0.166588	0.012981				0.786667	0.154108	0.160389
0.787083	0.364338	0.28062			0.787083	0.167345	0.012954				0.787083	0.153225	0.16177
0.7875	0.363567	0.280435			0.7875	0.167102	0.0129968				0.7875	0.153935	0.161424
0.787917	0.364233	0.281047			0.787917	0.167383	0.0129162				0.787917	0.154976	0.161061
0.788333	0.365875	0.281969			0.788333	0.167061	0.0130075				0.788333	0.153807	0.161652
0.78875	0.36624	0.281538			0.78875	0.166746	0.0129095				0.78875	0.15181	0.160211
0.789167	0.3657	0.281881			0.789167	0.167021	0.0129381				0.789167	0.15302	0.160967
0.789583	0.36607	0.282386			0.789583	0.166828	0.0130674				0.789583	0.152727	0.158469
0.79	0.3662	0.281926			0.79	0.16837	0.0130211				0.79	0.153918	0.158061
0.790417	0.3669	0.282835			0.790417	0.167696	0.0130449				0.790417	0.153646	0.158696
0.790833	0.366541	0.282705			0.790833	0.16676	0.0129512				0.790833	0.155211	0.158226
0.79125	0.36691	0.282445			0.79125	0.166893	0.0129829				0.79125	0.153245	0.157583
0.791667	0.367225	0.283238			0.791667	0.166259	0.0130726				0.791667	0.152098	0.157565
0.792083	0.367193	0.283535			0.792083	0.167174	0.0130519				0.792083	0.153301	0.157523
0.7925	0.36821	0.28296			0.7925	0.169041	0.0130149				0.7925	0.151666	0.156966
0.792917	0.368527	0.283362			0.792917	0.169177	0.0130633				0.792917	0.153337	0.157232
0.793333	0.367568	0.284278			0.793333	0.168647	0.0129606				0.793333	0.153043	0.156843
0.79375	0.369094	0.283716			0.79375	0.167452	0.0129934				0.79375	0.152861	0.15648
0.794167	0.36939	0.284132			0.794167	0.16621	0.012954				0.794167	0.152442	0.156426
0.794583	0.369261	0.284319			0.794583	0.166803	0.0130356				0.794583	0.152	0.156213
0.795	0.369781	0.284635			0.795	0.166284	0.012979				0.795	0.152208	0.156414
0.795417	0.369683	0.285015			0.795417	0.168369	0.0130936				0.795417	0.152098	0.155913
0.795833	0.370122	0.284573			0.795833	0.16731	0.0131217				0.795833	0.151642	0.153647
0.79625	0.370352	0.285245			0.79625	0.170004	0.0130727				0.79625	0.151471	0.154783
0.796667	0.370777	0.285309			0.796667	0.170595	0.0131695				0.796667	0.151993	0.153634
0.797083	0.371015	0.285543			0.797083	0.169287	0.0131854				0.797083	0.150022	0.153078
0.7975	0.371431	0.285488			0.7975	0.168696	0.0131846				0.7975	0.151525	0.15379
0.797917	0.370959	0.285701			0.797917	0.167156	0.0131382				0.797917	0.150428	0.152232
0.798333	0.371768	0.286807			0.798333	0.166707	0.0130106				0.798333	0.151512	0.152188
0.79875	0.371201	0.286953			0.79875	0.168405	0.013134				0.79875	0.15177	0.151936
0.799167	0.372651	0.287237			0.799167	0.168844	0.0131877				0.799167	0.150849	0.153302
0.799583	0.373249	0.287954			0.799583	0.167224	0.0131057				0.799583	0.15104	0.151983
0.8	0.372974	0.288196			0.8	0.166827	0.0131831				0.8	0.150942	0.151712
0.800417	0.373157	0.287956			0.800417	0.166623	0.0132151				0.800417	0.150246	0.151426
0.800833	0.373635	0.28776			0.800833	0.16857	0.0132115				0.800833	0.150709	0.150695
0.80125	0.373272	0.2881			0.80125	0.169005	0.0132777				0.80125	0.151644	0.150688
0.801667	0.373514	0.287296			0.801667	0.168002	0.0133467				0.801667	0.150954	0.150165
0.802083	0.373916	0.288056			0.802083	0.167527	0.0132861				0.802083	0.150137	0.150442
0.8025	0.37474	0.288596			0.8025	0.169635	0.0133082				0.8025	0.150427	0.150261
0.802917	0.375318	0.288851			0.802917	0.168741	0.0132971				0.802917	0.150194	0.151556
0.803333	0.374624	0.288602			0.803333	0.167543	0.013272				0.803333	0.149821	0.151261
0.80375	0.374907	0.287992			0.80375	0.166329	0.0133443				0.80375	0.148758	0.149119
0.804167	0.376007	0.288371			0.804167	0.169178	0.0132763				0.804167	0.149532	0.148663
0.804583	0.375627	0.288996			0.804583	0.169769	0.0132276				0.804583	0.149367	0.150421
0.805	0.376491	0.288991			0.805	0.167894	0.0132283				0.805	0.149594	0.14929
0.805417	0.375664	0.289872			0.805417	0.16774	0.0132797				0.805417	0.14938	0.148342
0.805833	0.375801	0.289187			0.805833	0.168676	0.0132481				0.805833	0.148387	0.148583
0.80625	0.377078	0.289136			0.80625	0.168564	0.0132367				0.80625	0.150134	0.148464
0.806667	0.377189	0.289079			0.806667	0.167341	0.0132858				0.806667	0.149264	0.147669
0.807083	0.377663	0.289348			0.807083	0.168439	0.0132721				0.807083	0.150686	0.14841
0.8075	0.378166	0.289471			0.8075	0.168638	0.0133589				0.8075	0.149453	0.14808
0.807917	0.377786	0.290544			0.807917	0.169226	0.0133684				0.807917	0.148852	0.147377
0.808333	0.377595	0.28995			0.808333	0.167974	0.0133928				0.808333	0.147783	0.147743
0.80875	0.379176	0.289882			0.80875	0.168767	0.0132308				0.80875	0.149169	0.147054
0.809167	0.378809	0.290347			0.809167	0.165955	0.0133547				0.809167	0.148686	0.146634
0.809583	0.378945	0.290536			0.809583	0.166941	0.0134372				0.809583	0.149688	0.146803
0.81	0.379375	0.290606			0.81	0.167757	0.0134349				0.81	0.148609	0.146373
0.810417	0.378506	0.290796			0.810417	0.167675	0.0134777				0.810417	0.14879	0.145886
0.810833	0.380262	0.292403			0.810833	0.165692	0.0132771				0.810833	0.147256	0.146714
0.81125	0.379756	0.292059			0.81125	0.168251	0.0134807				0.81125	0.147732	0.145775
0.811667	0.379986	0.290588			0.811667	0.168431	0.013382				0.811667	0.147465	0.146641
0.812083	0.380095	0.291601			0.812083	0.166994	0.0134169				0.812083	0.148115	0.145162
0.8125	0.380738	0.291527			0.8125	0.168724	0.0135252				0.8125	0.148799	0.144712
0.812917	0.380444	0.291773			0.812917	0.167879	0.0133697				0.812917	0.146973	0.145015
0.813333	0.381264	0.291815			0.813333	0.167565	0.0133085				0.813333	0.146981	0.144555
0.81375	0.381945	0.292657			0.81375	0.170067	0.013406				0.81375	0.146113	0.144284
0.814167	0.381459	0.29197			0.814167	0.170084	0.0134291				0.814167	0.146356	0.144577
0.814583	0.381962	0.291992			0.814583	0.168407	0.0133208				0.814583	0.146561	0.143023
0.815	0.381649	0.292424			0.815	0.168037	0.0133667				0.815	0.146916	0.142924
0.815417	0.381464	0.292786			0.815417	0.167014	0.0133733				0.815417	0.148545	0.142743
0.815833	0.382425	0.292914			0.815833	0.169139	0.0133562				0.815833	0.145952	0.14369
0.81625	0.382468	0.292044			0.81625	0.169134	0.0133353				0.81625	0.146735	0.142744
0.816667	0.382793	0.292512			0.816667	0.168476	0.0134413				0.816667	0.144511	0.14232
0.817083	0.383634	0.291484			0.817083	0.168893	0.0134013				0.817083	0.146104	0.143097
0.8175	0.383744	0.29187			0.8175	0.168355	0.0133692				0.8175	0.146702	0.142331
0.817917	0.383274	0.292456			0.817917	0.169705	0.0134426				0.817917	0.14733	0.141881
0.818333	0.383147	0.292384			0.818333	0.171559	0.0134706				0.818333	0.145867	0.141955
0.81875	0.383072	0.292535			0.81875	0.168493	0.0135138				0.81875	0.145608	0.142912
0.819167	0.382907	0.29252			0.819167	0.168164	0.013658				0.819167	0.1468	0.142831
0.819583	0.383784	0.292174			0.819583	0.168025	0.0134732				0.819583	0.146724	0.141228
0.82	0.383744	0.293449			0.82	0.167825	0.0134658				0.82	0.144275	0.141722
0.820417	0.38435	0.292253			0.820417	0.169104	0.0134567				0.820417	0.146204	0.140452
0.820833	0.383895	0.293589			0.820833	0.169839	0.013497				0.820833	0.144733	0.141793
0.82125	0.38388	0.293139			0.82125	0.169689	0.0136042				0.82125	0.145553	0.140689
0.821667	0.384216	0.292496			0.821667	0.169288	0.0134916				0.821667	0.145583	0.141378
0.822083	0.383665	0.293348			0.822083	0.168479	0.0135146				0.822083	0.144599	0.140736
0.8225	0.383911	0.292837			0.8225	0.167424	0.0135829				0.8225	0.144981	0.140863
0.822917	0.38401	0.292216			0.822917	0.166677	0.0133963				0.822917	0.145057	0.140153
0.823333	0.385346	0.2924			0.823333	0.166286	0.0132764				0.823333	0.144046	0.13963
0.82375	0.384441	0.292654			0.82375	0.166829	0.0134835				0.82375	0.144602	0.14064
0.824167	0.384889	0.29204			0.824167	0.168688	0.01341				0.824167	0.144757	0.140838
0.824583	0.38455	0.293308			0.824583	0.168753	0.0134755				0.824583	0.143755	0.141484
0.825	0.38541	0.29222			0.825	0.167048	0.0134201				0.825	0.145291	0.140832
0.825417	0.385949	0.291913			0.825417	0.16761	0.0134578				0.825417	0.145664	0.138678
0.825833	0.385645	0.292268			0.825833	0.168642	0.0135532				0.825833	0.143924	0.139175
0.82625	0.385773	0.292171			0.82625	0.169217	0.0136581				0.82625	0.144948	0.139157
0.826667	0.385477	0.293007			0.826667	0.167666	0.0135551				0.826667	0.142534	0.138267
0.827083	0.384722	0.29345			0.827083	0.169951	0.0135193				0.827083	0.144628	0.138184
0.8275	0.385048	0.292646			0.8275	0.169345	0.0135925				0.8275	0.143756	0.137927
0.827917	0.385372	0.292787			0.827917	0.168803	0.0135824				0.827917	0.143402	0.139101
0.828333	0.385617	0.291957			0.828333	0.168348	0.0134102				0.828333	0.144492	0.138901
0.82875	0.385095	0.291668			0.82875	0.169815	0.0135424				0.82875	0.143623	0.138167
0.829167	0.386737	0.292305			0.829167	0.167991	0.0136835				0.829167	0.143127	0.138641
0.829583	0.386545	0.292277			0.829583	0.168867	0.013566				0.829583	0.144503	0.137184
0.83	0.385683	0.29225			0.83	0.169366	0.0136624				0.83	0.144087	0.136306
0.830417	0.385822	0.292446			0.830417	0.16935	0.0135396				0.830417	0.144153	0.138742
0.830833	0.386541	0.293204			0.830833	0.169248	0.0134847				0.830833	0.143237	0.137109
0.83125	0.386352	0.292367			0.83125	0.169495	0.0135432				0.83125	0.142966	0.137007
0.831667	0.387092	0.293377			0.831667	0.169205	0.0135809				0.831667	0.142762	0.13696
0.832083	0.386974	0.292873			0.832083	0.169342	0.0135589				0.832083	0.14255	0.136909
[truncated: 18,003 more rows]
