# Supplementary material for: Extracellular electron transfer increases fermentation in lactic acid bacteria via a hybrid metabolism
Source: eLife. 2022 Feb 11;11:e70684. doi: 10.7554/eLife.70684 (PMC8837199; doi:10.7554/eLife.70684)
Supplement: Figure 4—figure supplement 1—source data 1. [file elife-70684-fig4-figsupp1-data1.xlsx]

## Sheet: Figure 4 - Figure supplement 1
Metal concentrations in L. plantarum under different growth conditions.
Atoms/CFU	Na	Mg	Al	K	Ca	Cu	Zn	Ba	Mn	Fe
mMRS_1	1.66028e+08	678130	390977	6.50665e+07	39999.9	3660.18	82434.6	7313.72	6.87613e+06	13176
mMRS_2	2.04627e+08	290407	982772	4.50777e+07	27335.7	1601.45	41668.4	3004.06	3.22875e+06	8443.48
mMRS_3	2.59973e+08	350497	503002	3.59865e+07	38510	1888.49	43784.4	3231.82	3.52893e+06	4311.97
Iron_1	2.10484e+08	483953	418652	7.42628e+07	24397	3889.36	72129.4	2302.6	5.85077e+06	607415
Iron_2	1.6434e+08	465475	560562	6.08013e+07	24272.7	4543.87	70035	2024.19	5.6453e+06	438649
Iron_3	2.06346e+08	507022	1.63793e+06	6.31863e+07	22522.5	4971.38	68332.9	1665.99	5.60381e+06	501602
Iron+DHNA_1	1.24583e+08	500489	2.95554e+06	8.10236e+07	26025.5	5683.43	80399.1	1503.25	7.25546e+06	27188.7
Iron+DHNA_2	1.31107e+08	283611	312998	5.12034e+07	19816.9	1978.21	47556.6	2016.12	3.97958e+06	18048.7
Iron+DHNA_3	1.2677e+08	272317	280541	5.50102e+07	16657.1	1900.78	44931.3	925.428	3.8017e+06	17142.7
