# Supplementary material for: Extracellular electron transfer increases fermentation in lactic acid bacteria via a hybrid metabolism
Source: eLife. 2022 Feb 11;11:e70684. doi: 10.7554/eLife.70684 (PMC8837199; doi:10.7554/eLife.70684)
Supplement: Figure 4—figure supplement 2—source data 1. [file elife-70684-fig4-figsupp2-data1.xlsx]

## Sheet: Figure 4 - Figure supplement 2
Metal concentrations in Wild-type L. plantarum or an ndh2 deletion mutant after growth in mMRS with iron and DHNA.
Atoms/CFU	Na	Mg	Al	K	Ca	Cu	Zn	Ba	Mn	Fe
WT_1	8.87998e+07	199857	609918	1.94043e+07	60470.3	2728.03	129189	1.123e+06	4.86063e+06	27819.4
WT_2	7.04623e+07	194691	590819	1.81662e+07	58443.2	2731.73	117894	965810	4.80707e+06	25166.3
WT_3	7.57382e+07	170356	509778	1.7389e+07	56154.2	2586.45	98494.3	676780	4.42814e+06	22730.7
ndh2_1	9.0395e+07	227514	637340	1.73103e+07	115827	3279.73	77491.6	103142	4.64003e+06	35689.2
ndh2_2	1.13823e+08	204465	2.95641e+06	2.04384e+07	131362	2739.97	72316.3	111155	4.45837e+06	35347.3
ndh2_3	6.6998e+07	188083	131093	2.37943e+07	107756	2166.05	61456.6	44016.4	4.18638e+06	22928.1
