# Supplementary material for: Extracellular electron transfer increases fermentation in lactic acid bacteria via a hybrid metabolism
Source: eLife. 2022 Feb 11;11:e70684. doi: 10.7554/eLife.70684 (PMC8837199; doi:10.7554/eLife.70684)
Supplement: Figure 4—figure supplement 3—source data 1. [file elife-70684-fig4-figsupp3-data1.xlsx]

## Sheet: Sheet1
L. plantarum intracellular NAD and NADH under different growth conditions.
Group	mCDM	DHNA	Iron	Both
NAD (ABS)	20	52	448	368
	39	56	428	278
	25	52	515	357
NADH (ABS)	1	1	3	1
	1	1	2	1
	1	1	4	3
NAD/NADH	20	52	149.333	368
	39	56	214	278
	25	52	128.75	119
