# Supplementary material for: Extracellular electron transfer increases fermentation in lactic acid bacteria via a hybrid metabolism
Source: eLife. 2022 Feb 11;11:e70684. doi: 10.7554/eLife.70684 (PMC8837199; doi:10.7554/eLife.70684)
Supplement: Figure 4—source data 1. [file elife-70684-fig4-data1.xlsx]

## Sheet: Panel A and B
L. plantarum biomass and cell numbers under different growth conditions.
	Dry weight
		OC			ANODE
		1	2	3	7	8	9
	Eppendorf	930.74	930.75	942.2	942.17	911.75	940.02
	Epp+biomass	930.84	930.82	942.29	942.72	912.12	940.5
	mg	0.1	0.07	0.09	0.55	0.37	0.48
	mg/mL	0.004	0.0028	0.0036	0.022	0.0148	0.0192
	CFU counts
		T=O			At Imax
		OC	ANODE		OC	ANODE
		22000000			7200000	46000000
		26000000	26000000		10000000	70000000
		32000000	22000000		8800000	80000000
			24000000
			18000000
			38000000

## Sheet: Panel C
L. plantarum growth (OD600) under different conditions.
	OD
	Time (days)	ANODE	ANODE	ANODE		OC	OC	OC
	0	0.25	0.23			0.31	0.26
	0.854167	0.3	0.29	0.27		0.19	0.14	0.19
	1.88542	0.54	0.75	0.73		0.17	0.14	0.18
	2.88542	0.5	0.68	0.74		0.36	0.19	0.25
	5	0.6	1	0.93		0.88	0.62	0.63
	6.08333	0.6	0.9	1		0.85	0.6	0.6

## Sheet: Panel D
L. plantarum intracellular ATP under different growth conditions.
Group	+DHNA +Mannitol (EET)	+Mannitol	+DHNA	+DHNA +Mannitol (Open Circuit)
ATP (pmol/OD600)	8.17211	3.97888	0.841685	2.40822
	6.41958	3.96648	0.481918	1.36314
	10.6245	3.38391	1.38261	1.88147

## Sheet: Panel E
L. plantarum intracellular NAD and NADH under different growth conditions.
Group	+DHNA +Mannitol (EET)	+Mannitol	+DHNA	+DHNA +Mannitol (Open Circuit)
NAD (ABS)	145	26	68	7
	96	35	49	16
	206	49	79	13
NADH (ABS)	5	6	3	2
	2	8	3	2
	3	10	3	2
NAD/NADH	29	4.33333	22.6667	3.5
	48	4.375	16.3333	8
	68.6667	4.9	26.3333	6.5
ABS = absorption units
