# Supplementary material for: Extracellular electron transfer increases fermentation in lactic acid bacteria via a hybrid metabolism
Source: eLife. 2022 Feb 11;11:e70684. doi: 10.7554/eLife.70684 (PMC8837199; doi:10.7554/eLife.70684)
Supplement: Figure 5—figure supplement 1—source data 1. [file elife-70684-fig5-figsupp1-data1.xlsx]

## Sheet: Panel A
time/s days	WT + heme	WT + heme		time/s days	WT no heme	WT no heme	WT no heme
	<J>/µA/cm²	<J>/µA/cm²			<J>/µA/cm²	<J>/µA/cm²	<J>/µA/cm²
0	0.698308	0.81669		0	10.3002	5.56531	5.28991
0.000416667	0.575903	0.760376		0.000416667	5.52162	3.05137	2.86388
0.000833333	0.57416	0.752891		0.000833333	5.15087	2.95684	2.76991
0.00125	0.572825	0.749935		0.00125	5.07361	2.89522	2.68974
0.00166667	0.571054	0.746722		0.00166667	5.01711	2.82294	2.66161
0.00208333	0.571603	0.748335		0.00208333	5.03442	2.91917	2.65588
0.0025	0.571063	0.745855		0.0025	5.09058	2.86852	2.66186
0.00291667	0.568342	0.750971		0.00291667	5.1707	2.96544	2.67244
0.00333333	0.568526	0.749984		0.00333333	5.28589	2.89857	2.68582
0.00375	0.567439	0.750087		0.00375	5.30834	2.93409	2.71082
0.00416667	0.567399	0.7485		0.00416667	5.31674	3.02672	2.73807
0.00458333	0.565901	0.74696		0.00458333	5.35593	2.96519	2.75618
0.005	0.565647	0.746079		0.005	5.41744	3.04694	2.78052
0.00541667	0.564796	0.749481		0.00541667	5.46698	3.01344	2.80123
0.00583333	0.5641	0.74591		0.00583333	5.53986	2.89763	2.82666
0.00625	0.563081	0.742992		0.00625	5.584	3.08411	2.85018
0.00666667	0.563798	0.740525		0.00666667	5.67123	3.0465	2.87697
0.00708333	0.564312	0.745026		0.00708333	5.76359	3.10751	2.89331
0.0075	0.562714	0.74089		0.0075	5.78413	3.14718	2.91317
0.00791667	0.564161	0.744856		0.00791667	5.87444	3.07971	2.93547
0.00833333	0.563143	0.748525		0.00833333	5.90816	3.21101	2.96589
0.00875	0.562699	0.738619		0.00875	5.95991	3.17133	2.99207
0.00916667	0.562833	0.740029		0.00916667	6.01674	3.20802	3.02101
0.00958333	0.560016	0.742939		0.00958333	6.08952	3.31489	3.0417
0.01	0.558883	0.738867		0.01	6.19068	3.24531	3.07264
0.0104167	0.5567	0.745286		0.0104167	6.216	3.35662	3.09831
0.0108333	0.556784	0.736536		0.0108333	6.30064	3.39345	3.12923
0.01125	0.556046	0.737126		0.01125	6.40538	3.35219	3.16027
0.0116667	0.555453	0.735725		0.0116667	6.44867	3.50077	3.18835
0.0120833	0.556214	0.736276		0.0120833	6.51006	3.45915	3.22286
0.0125	0.553823	0.735911		0.0125	6.59934	3.50127	3.25365
0.0129167	0.553511	0.740435		0.0129167	6.67455	3.62259	3.28344
0.0133333	0.553823	0.738395		0.0133333	6.72793	3.4958	3.31894
0.01375	0.554178	0.733351		0.01375	6.78992	3.63374	3.34025
0.0141667	0.554123	0.732226		0.0141667	6.89086	3.64113	3.36407
0.0145833	0.554135	0.737086		0.0145833	6.96307	3.6512	3.40584
0.015	0.553597	0.737788		0.015	6.98677	3.80567	3.47152
0.0154167	0.554469	0.733392		0.0154167	7.07753	3.7139	3.51306
0.0158333	0.553588	0.735781		0.0158333	7.16359	3.81623	3.54303
0.01625	0.553593	0.735127		0.01625	7.22301	3.87581	3.5776
0.0166667	0.552383	0.736447		0.0166667	7.28293	3.78456	3.60287
0.0170833	0.552755	0.732624		0.0170833	7.34907	3.96539	3.61088
0.0175	0.551325	0.736719		0.0175	7.40195	3.93818	3.62585
0.0179167	0.549798	0.727841		0.0179167	7.50549	3.89545	3.66302
0.0183333	0.637935	0.728713		0.0183333	7.60246	4.09827	3.68842
0.01875	0.657083	0.728125		0.01875	7.66833	4.03971	3.72069
0.0191667	0.548229	0.744681		0.0191667	7.69079	4.06629	3.75946
0.0195833	0.525698	0.768392		0.0195833	7.75014	4.18637	3.79504
0.02	0.503586	0.640836		0.02	7.84488	4.14337	3.83698
0.0204167	0.544568	0.591205		0.0204167	7.95293	4.29537	3.87395
0.0208333	0.559044	0.542311		0.0208333	8.01334	4.23046	3.90893
0.02125	0.563191	0.536502		0.02125	8.11956	4.26255	3.94519
0.0216667	0.56905	0.535321		0.0216667	8.17671	4.35286	3.99193
0.0220833	0.570836	0.532044		0.0220833	8.18669	4.24286	4.08081
0.0225	0.57151	0.532271		0.0225	8.32766	4.41526	4.09058
0.0229167	0.568137	0.537927		0.0229167	8.43259	4.42189	4.10655
0.0233333	0.559865	0.548095		0.0233333	8.42757	4.29435	4.12654
0.02375	0.525235	0.524011		0.02375	8.54496	4.50486	4.15904
0.0241667	0.497898	0.521569		0.0241667	8.64193	4.45736	4.18515
0.0245833	0.480397	0.515865		0.0245833	8.70555	4.50386	4.22256
0.025	0.467752	0.513921		0.025	8.84491	4.61459	4.25725
0.0254167	0.457209	0.512132		0.0254167	8.93176	4.41383	4.31968
0.0258333	0.448812	0.512372		0.0258333	9.03936	4.6263	4.3537
0.02625	0.441106	0.514754		0.02625	9.10324	4.54395	4.38326
0.0266667	0.435512	0.507171		0.0266667	9.15774	4.45065	4.41504
0.0270833	0.431516	0.505179		0.0270833	9.22772	4.77522	4.45292
0.0275	0.426553	0.498111		0.0275	9.2928	4.71335	4.4912
0.0279167	0.423208	0.504197		0.0279167	9.2917	4.75167	4.52799
0.0283333	0.420659	0.499646		0.0283333	9.41923	4.92672	4.56556
0.02875	0.418235	0.504433		0.02875	9.5436	4.85351	4.59852
0.0291667	0.412139	0.498347		0.0291667	9.59508	4.97133	4.63932
0.0295833	0.411115	0.502176		0.0295833	9.61978	5.05086	4.68769
0.03	0.410592	0.492148		0.03	9.73977	4.96363	4.76748
0.0304167	0.407341	0.503447		0.0304167	9.89518	5.11147	4.76546
0.0308333	0.405687	0.496812		0.0308333	9.89986	5.15328	4.85642
0.03125	0.404465	0.491214		0.03125	9.98279	5.08354	4.87943
0.0316667	0.402099	0.494245		0.0316667	10.0607	5.27525	4.90591
0.0320833	0.402805	0.494698		0.0320833	10.2949	5.17165	4.94551
0.0325	0.400731	0.495745		0.0325	10.2652	5.08441	4.98123
0.0329167	0.400442	0.495624		0.0329167	10.3271	5.34163	5.0246
0.0333333	0.397219	0.485669		0.0333333	10.3632	5.33441	5.06607
0.03375	0.397489	0.495956		0.03375	10.4351	5.25074	5.10285
0.0341667	0.396379	0.48456		0.0341667	10.5767	5.3956	5.15042
0.0345833	0.39587	0.492505		0.0345833	10.6592	5.16093	5.1843
0.035	0.394335	0.490038		0.035	10.7147	5.10563	5.22267
0.0354167	0.394949	0.486159		0.0354167	10.7375	5.37814	5.25384
0.0358333	0.393185	0.49057		0.0358333	10.8455	5.39389	5.29258
0.03625	0.392356	0.487052		0.03625	10.9582	5.6124	5.34289
0.0366667	0.39237	0.486065		0.0366667	11.0492	5.70432	5.37882
0.0370833	0.391491	0.488311		0.0370833	11.1348	5.5848	5.42311
0.0375	0.390493	0.489417		0.0375	11.2157	5.78836	5.46104
0.0379167	0.389823	0.488676		0.0379167	11.2314	5.79188	5.49132
0.0383333	0.390561	0.481237		0.0383333	11.322	5.62837	5.53172
0.03875	0.388587	0.482889		0.03875	11.3871	5.84041	5.57116
0.0391667	0.388472	0.481285		0.0391667	11.503	5.88992	5.61927
0.0395833	0.387785	0.486256		0.0395833	11.5335	5.74729	5.65612
0.04	0.387958	0.481705		0.04	11.6725	5.94824	5.68682
0.0404167	0.386931	0.484683		0.0404167	11.751	5.96556	5.74846
0.0408333	0.385907	0.481485		0.0408333	11.7847	5.76597	5.78927
0.04125	0.385609	0.481343		0.04125	11.878	6.04465	5.81906
0.0416667	0.385306	0.484398		0.0416667	12.137	6.08295	5.82306
0.0420833	0.385452	0.480787		0.0420833	12.201	5.88638	5.83565
0.0425	0.3847	0.482336		0.0425	12.2658	6.08879	5.84751
0.0429167	0.383807	0.475625		0.0429167	12.3319	6.14704	5.86869
0.0433333	0.38525	0.486241		0.0433333	12.5035	5.93364	5.90151
0.04375	0.383603	0.477249		0.04375	12.4721	6.13619	5.93321
0.0441667	0.383823	0.483144		0.0441667	12.4954	6.40125	5.95689
0.0445833	0.383203	0.476795		0.0445833	12.6153	6.18645	5.97869
0.045	0.383289	0.482382		0.045	12.6851	6.1512	5.99874
0.0454167	0.382691	0.478669		0.0454167	12.798	6.51419	6.05521
0.0458333	0.381308	0.475965		0.0458333	12.8899	6.38542	6.07029
0.04625	0.381822	0.47339		0.04625	12.9592	6.38116	6.09721
0.0466667	0.380601	0.480529		0.0466667	13.1458	6.67344	6.11866
0.0470833	0.380121	0.47627		0.0470833	13.2286	6.49014	6.14834
0.0475	0.379747	0.478728		0.0475	13.2663	6.46784	6.17875
0.0479167	0.378827	0.474857		0.0479167	13.3359	6.72371	6.21809
0.0483333	0.379008	0.474081		0.0483333	13.4003	6.51769	6.24422
0.04875	0.378723	0.473196		0.04875	13.4301	6.47001	6.26316
0.0491667	0.376838	0.470776		0.0491667	13.5817	6.85561	6.29869
0.0495833	0.377798	0.480312		0.0495833	13.6323	6.60251	6.32779
0.05	0.377457	0.473178		0.05	13.7783	6.52698	6.3558
0.0504167	0.377285	0.469618		0.0504167	13.8842	6.90945	6.37924
0.0508333	0.374883	0.475712		0.0508333	13.9582	6.79558	6.41677
0.05125	0.37521	0.467887		0.05125	13.9653	6.72172	6.44232
0.0516667	0.37517	0.470696		0.0516667	14.01	7.02549	6.48396
0.0520833	0.375017	0.466799		0.0520833	14.0951	6.85778	6.5101
0.0525	0.373977	0.472512		0.0525	14.201	6.78499	6.52889
0.0529167	0.374791	0.469221		0.0529167	14.3335	7.00881	6.54677
0.0533333	0.373826	0.467178		0.0533333	14.3687	6.95431	6.57811
0.05375	0.373042	0.46815		0.05375	14.4615	6.89544	6.63909
0.0541667	0.372215	0.466394		0.0541667	14.5907	7.07627	6.66914
0.0545833	0.371506	0.470222		0.0545833	14.6205	7.26759	6.71006
0.055	0.371673	0.462034		0.055	14.7932	6.96682	6.76471
0.0554167	0.371186	0.467306		0.0554167	14.7565	7.02761	6.7751
0.0558333	0.37106	0.464936		0.0558333	14.7722	7.29545	6.79281
0.05625	0.369849	0.465555		0.05625	14.8493	7.10202	6.81195
0.0566667	0.370904	0.464274		0.0566667	14.8645	7.02146	6.81883
0.0570833	0.370276	0.461722		0.0570833	14.9308	7.42394	6.88611
0.0575	0.369915	0.460326		0.0575	15.0071	7.29935	6.88922
0.0579167	0.369132	0.462609		0.0579167	15.0629	7.10688	6.92959
0.0583333	0.368187	0.46572		0.0583333	15.1488	7.41851	6.94403
0.05875	0.36946	0.459351		0.05875	15.2274	7.39286	6.98453
0.0591667	0.367782	0.459572		0.0591667	15.2765	7.21446	7.00574
0.0595833	0.368261	0.456696		0.0595833	15.3209	7.50339	7.06238
0.06	0.367566	0.461595		0.06	15.33	7.51775	7.12202
0.0604167	0.366358	0.459416		0.0604167	15.4606	7.3382	7.13199
0.0608333	0.365495	0.452854		0.0608333	15.5178	7.58236	7.14008
0.06125	0.365836	0.464362		0.06125	15.5469	7.61111	7.16671
0.0616667	0.36494	0.44967		0.0616667	15.6056	7.42367	7.20192
0.0620833	0.364578	0.454509		0.0620833	15.5051	7.49482	7.24614
0.0625	0.363767	0.450449		0.0625	15.5839	7.45523	7.28487
0.0629167	0.362944	0.459354		0.0629167	15.6704	7.40386	7.30202
0.0633333	0.362534	0.448713		0.0633333	15.7611	7.67291	7.33198
0.06375	0.363007	0.45111		0.06375	15.8688	7.86199	7.33185
0.0641667	0.362322	0.454784		0.0641667	15.9068	7.54843	7.34721
0.0645833	0.361239	0.448983		0.0645833	15.8667	7.68553	7.37464
0.065	0.360888	0.452588		0.065	15.9381	7.88562	7.40501
0.0654167	0.360977	0.451334		0.0654167	15.9758	7.65644	7.39683
0.0658333	0.360221	0.447699		0.0658333	16.0971	7.81752	7.45676
0.06625	0.360481	0.451194		0.06625	16.2234	7.73461	7.4945
0.0666667	0.360929	0.445431		0.0666667	16.2577	7.58058	7.49786
0.0670833	0.360034	0.453148		0.0670833	16.2115	7.77653	7.53551
0.0675	0.359443	0.443259		0.0675	16.313	7.96896	7.5538
0.0679167	0.388185	0.443536		0.0679167	16.2604	7.76535	7.59395
0.0683333	0.754792	0.471949		0.0683333	16.2634	8.07975	7.61195
0.06875	0.762174	0.53453		0.06875	16.409	8.138	7.61875
0.0691667	0.799796	0.547889		0.0691667	16.4938	7.83181	7.66215
0.0695833	0.827042	0.580674		0.0695833	16.5635	8.12296	7.68827
0.07	0.83904	0.602573		0.07	16.5875	8.16596	7.72122
0.0704167	0.840605	0.627008		0.0704167	16.5868	7.84343	7.75384
0.0708333	0.838772	0.647622		0.0708333	16.6618	8.18873	7.7697
0.07125	0.841688	0.660464		0.07125	16.748	8.1368	7.79075
0.0716667	0.849918	0.680026		0.0716667	16.7564	7.92874	7.79996
0.0720833	0.863879	0.689258		0.0720833	16.7953	8.07112	7.8384
0.0725	0.87938	0.726663		0.0725	16.7923	8.16178	7.84512
0.0729167	0.894394	0.752196		0.0729167	16.8282	8.01844	7.86074
0.0733333	0.906176	0.778851		0.0733333	16.9353	8.363	7.91815
0.07375	0.917351	0.80626		0.07375	16.956	8.04337	7.92499
0.0741667	0.927826	0.826554		0.0741667	16.9873	7.8154	7.92765
0.0745833	0.944104	0.850968		0.0745833	16.9593	8.24575	7.94112
0.075	0.958792	0.864362		0.075	17.1223	8.33828	7.97202
0.0754167	0.980929	0.892513		0.0754167	17.1268	7.99868	8.00901
0.0758333	1.00269	0.919368		0.0758333	17.1184	8.17167	7.99809
0.07625	1.02437	0.955819		0.07625	17.254	8.35688	8.02017
0.0766667	1.05106	0.986105		0.0766667	17.3057	8.02353	8.044
0.0770833	1.07405	1.02395		0.0770833	17.3155	8.1754	8.06109
0.0775	1.09989	1.0516		0.0775	17.3998	8.39379	8.08953
0.0779167	1.13205	1.08004		0.0779167	17.4407	8.11338	8.13068
0.0783333	1.15835	1.12356		0.0783333	17.4042	8.27783	8.14221
0.07875	1.18434	1.16557		0.07875	17.4973	8.48921	8.15047
0.0791667	1.21315	1.20323		0.0791667	17.4942	8.18856	8.15262
0.0795833	1.24529	1.23206		0.0795833	17.5786	8.52753	8.16166
0.08	1.27931	1.27617		0.08	17.6032	8.42864	8.2028
0.0804167	1.31114	1.30305		0.0804167	17.6739	8.25552	8.22196
0.0808333	1.34325	1.33224		0.0808333	17.7207	8.64624	8.21928
0.08125	1.37953	1.38012		0.08125	17.8413	8.41242	8.24382
0.0816667	1.40189	1.42429		0.0816667	17.8663	8.13196	8.26615
0.0820833	1.43503	1.45706		0.0820833	17.8259	8.55636	8.31514
0.0825	1.45878	1.49949		0.0825	17.8575	8.47226	8.32598
0.0829167	1.48982	1.60425		0.0829167	17.9486	8.20797	8.33571
0.0833333	1.51464	1.61419		0.0833333	17.9977	8.56973	8.36469
0.08375	1.52777	1.8857		0.08375	17.9614	8.4248	8.37085
0.0841667	1.57379	1.70722		0.0841667	18.0813	8.20548	8.37849
0.0845833	1.59685	1.67228		0.0845833	18.1668	8.54769	8.39632
0.085	1.63368	1.75281		0.085	18.109	8.49375	8.40776
0.0854167	1.62897	1.78905		0.0854167	18.1974	8.30311	8.42704
0.0858333	1.64898	1.76728		0.0858333	18.2687	8.56071	8.44637
0.08625	1.6535	1.79308		0.08625	18.1758	8.60782	8.47059
0.0866667	1.6618	1.80882		0.0866667	18.2421	8.3767	8.48901
0.0870833	1.69371	1.84733		0.0870833	18.2508	8.64952	8.50732
0.0875	1.70513	1.89879		0.0875	18.3652	8.73716	8.50448
0.0879167	1.71083	1.93978		0.0879167	18.3571	8.4401	8.50636
0.0883333	1.72803	1.96324		0.0883333	18.3671	8.66617	8.5708
0.08875	1.74537	1.99629		0.08875	18.6041	8.76116	8.58755
0.0891667	1.78147	2.05		0.0891667	18.6474	8.4677	8.58726
0.0895833	1.82221	2.07268		0.0895833	18.6618	8.74052	8.59141
0.09	1.83471	2.11261		0.09	18.7582	8.6976	8.60812
0.0904167	1.85684	2.0996		0.0904167	18.8317	8.55606	8.62573
0.0908333	1.86236	2.16652		0.0908333	18.6981	8.93765	8.62588
0.09125	1.88295	2.20031		0.09125	18.6248	8.81807	8.65965
0.0916667	1.91638	2.23483		0.0916667	18.6779	8.65183	8.69833
0.0920833	1.94785	2.27515		0.0920833	18.7411	8.84662	8.71892
0.0925	1.9612	2.32925		0.0925	18.7254	8.70316	8.71502
0.0929167	1.98592	2.34021		0.0929167	18.8193	8.50752	8.74341
0.0933333	2.00256	2.42082		0.0933333	18.8562	8.67216	8.75034
0.09375	2.03939	2.41487		0.09375	18.8323	8.62683	8.74858
0.0941667	2.07258	2.45927		0.0941667	18.8975	8.46798	8.74246
0.0945833	2.0936	2.50513		0.0945833	18.8712	8.85487	8.78835
0.095	2.108	2.50718		0.095	18.9016	8.83143	8.80487
0.0954167	2.12778	2.56254		0.0954167	18.9572	8.61514	8.81297
0.0958333	2.15364	2.55326		0.0958333	18.951	8.94891	8.81227
0.09625	2.17037	2.6245		0.09625	19.1422	9.07	8.83103
0.0966667	2.20026	2.653		0.0966667	19.1457	8.82668	8.82719
0.0970833	2.22247	2.6855		0.0970833	19.1981	9.06275	8.87731
0.0975	2.23373	2.72388		0.0975	19.2379	9.22494	8.88507
0.0979167	2.25707	2.74374		0.0979167	19.2136	8.93573	8.91868
0.0983333	2.26993	2.73432		0.0983333	19.2597	8.9472	8.90228
0.09875	2.29204	2.79252		0.09875	19.3784	9.3705	8.95526
0.0991667	2.32908	2.83357		0.0991667	19.3576	8.95312	8.96578
0.0995833	2.34253	2.85849		0.0995833	19.3916	9.06128	8.92385
0.1	2.35577	2.90106		0.1	19.358	9.48716	8.93403
0.100417	2.3701	2.936		0.100417	19.3276	9.19065	8.96822
0.100833	2.39003	2.96514		0.100833	19.3304	9.242	9.00679
0.10125	2.41209	3.01389		0.10125	19.3645	9.47681	8.99967
0.101667	2.41582	2.97823		0.101667	19.3276	9.13756	9.0662
0.102083	2.43718	3.04413		0.102083	19.368	9.2667	9.04473
0.1025	2.458	3.01891		0.1025	19.3702	9.61056	9.06348
0.102917	2.47376	3.06013		0.102917	19.5433	9.20759	9.07832
0.103333	2.49889	3.11706		0.103333	19.5643	9.29405	9.07092
0.10375	2.49888	3.13497		0.10375	19.6527	9.54926	9.11291
0.104167	2.54137	3.1756		0.104167	19.8206	9.10796	9.10969
0.104583	2.58347	3.19765		0.104583	19.7209	9.24852	9.09712
0.105	2.60483	3.19978		0.105	19.7501	9.32819	9.11594
0.105417	2.64703	3.20016		0.105417	19.7142	9.08304	9.15588
0.105833	2.68188	3.19939		0.105833	19.8098	9.43138	9.14436
0.10625	2.68454	3.22585		0.10625	19.706	9.16271	9.16409
0.106667	2.66565	3.2589		0.106667	19.8787	8.80361	9.20629
0.107083	2.68109	3.33211		0.107083	19.8553	9.26097	9.23852
0.1075	2.70555	3.32932		0.1075	19.8285	9.53665	9.23691
0.107917	2.71932	3.31362		0.107917	19.9406	9.24247	9.23942
0.108333	2.71682	3.37697		0.108333	20.0056	9.57672	9.24293
0.10875	2.72682	3.42676		0.10875	19.928	9.48926	9.23727
0.109167	2.76373	3.42003		0.109167	19.8945	9.18644	9.26602
0.109583	2.77543	3.47784		0.109583	19.9739	9.19277	9.29247
0.11	2.78921	3.47183		0.11	19.9983	8.95076	9.30423
0.110417	2.80002	3.51387		0.110417	20.072	9.00661	9.33326
0.110833	2.82594	3.53601		0.110833	20.0953	9.5215	9.34044
0.11125	2.83709	3.59216		0.11125	20.0199	9.4534	9.35966
0.111667	2.86127	3.55634		0.111667	20.0152	9.35774	9.33616
0.112083	2.8525	3.61051		0.112083	20.1185	9.68779	9.39945
0.1125	2.871	3.57294		0.1125	20.1566	9.57045	9.3625
0.112917	2.90217	3.60916		0.112917	20.2012	9.47393	9.46119
0.113333	2.91482	3.68082		0.113333	20.2764	9.75221	9.46526
0.11375	2.92328	3.71299		0.11375	20.3571	9.47522	9.46439
0.114167	2.92184	3.71962		0.114167	20.3955	9.59577	9.4337
0.114583	2.9673	3.74449		0.114583	20.507	9.70789	9.4509
0.115	2.97296	3.72823		0.115	20.4471	9.48679	9.50806
0.115417	2.96729	3.73148		0.115417	20.436	9.42317	9.51635
0.115833	2.97919	3.77956		0.115833	20.4666	9.3385	9.50173
0.11625	3.00802	3.80954		0.11625	20.3871	9.33896	9.53628
0.116667	3.01999	3.75342		0.116667	20.4	9.62369	9.53389
0.117083	3.01454	3.78899		0.117083	20.4979	9.40478	9.64781
0.1175	3.03591	3.76369		0.1175	20.4806	9.2564	9.56912
0.117917	3.05278	3.76299		0.117917	20.4602	9.69836	9.55227
0.118333	3.02949	3.75976		0.118333	20.4206	9.50427	9.58332
0.11875	3.08003	3.84651		0.11875	20.4301	9.29512	9.5843
0.119167	3.08065	3.86764		0.119167	20.4136	9.81174	9.59601
0.119583	3.08899	3.85469		0.119583	20.4811	9.49082	9.61403
0.12	3.09683	3.89729		0.12	20.4704	9.12807	9.61865
0.120417	3.11889	3.98225		0.120417	20.5286	9.53222	9.67956
0.120833	3.13671	3.93523		0.120833	20.5843	9.69447	9.71942
0.12125	3.14814	3.93313		0.12125	20.6197	9.53353	9.68876
0.121667	3.19468	4.01669		0.121667	20.7788	9.99155	9.74863
0.122083	3.21718	4.01626		0.122083	20.763	9.80828	9.74743
0.1225	3.16736	3.9793		0.1225	20.6143	9.61758	9.74492
0.122917	3.17765	3.96402		0.122917	20.6296	10.107	9.72107
0.123333	3.1853	4.0191		0.123333	20.7301	9.85425	9.70527
0.12375	3.20071	4.00238		0.12375	20.927	9.55741	9.74378
0.124167	3.2256	4.01814		0.124167	20.6788	10.0038	9.78342
0.124583	3.27097	4.03966		0.124583	20.7235	9.79752	9.83367
0.125	3.28017	4.03385		0.125	20.7806	9.51885	9.84224
0.125417	3.24421	4.04507		0.125417	20.8481	10.0703	9.85545
0.125833	3.23525	3.99225		0.125833	20.852	9.97973	9.84123
0.12625	3.26244	4.08303		0.12625	20.8991	9.66579	9.88178
0.126667	3.26286	4.08208		0.126667	20.9605	10.1065	9.89978
0.127083	3.23827	4.10659		0.127083	20.8481	9.77013	9.89879
0.1275	3.24678	4.1227		0.1275	20.8436	9.64011	9.83971
0.127917	3.2626	4.16402		0.127917	20.9625	10.0867	9.88636
0.128333	3.27295	4.17756		0.128333	20.8816	9.80087	9.89789
0.12875	3.28359	4.24737		0.12875	20.8493	9.73204	9.91444
0.129167	3.30139	4.21238		0.129167	21.004	10.1848	9.89807
0.129583	3.28083	4.18434		0.129583	21.0254	9.8115	9.97583
0.13	3.31988	4.16212		0.13	21.0892	9.82316	10.0257
0.130417	3.3694	4.18772		0.130417	21.1359	10.1773	10.0484
0.130833	3.35404	4.20845		0.130833	21.0479	9.72999	10.0676
0.13125	3.33681	4.16854		0.13125	21.1257	9.79791	10.1029
0.131667	3.34825	4.20441		0.131667	21.0725	10.1954	10.0686
0.132083	3.36789	4.24357		0.132083	21.1086	9.74615	10.1045
0.1325	3.40135	4.23953		0.1325	21.119	9.75373	10.1042
0.132917	3.40794	4.31942		0.132917	21.0285	10.1146	10.0539
0.133333	3.40884	4.29828		0.133333	21.1896	9.77038	10.1087
0.13375	3.41062	4.24341		0.13375	21.2462	9.6931	10.105
0.134167	3.41405	4.2767		0.134167	21.1326	10.0971	10.1366
0.134583	3.42957	4.24478		0.134583	21.3098	9.69827	10.1894
0.135	3.44083	4.29827		0.135	21.3127	9.63465	10.1449
0.135417	3.4408	4.29997		0.135417	21.5345	10.0623	10.1981
0.135833	3.43091	4.27293		0.135833	21.4218	9.78647	10.2326
0.13625	3.46347	4.29662		0.13625	21.5138	9.75197	10.2632
0.136667	3.47167	4.321		0.136667	21.3533	10.2691	10.2205
0.137083	3.513	4.31318		0.137083	21.4174	9.89367	10.2146
0.1375	3.49289	4.35846		0.1375	21.4911	9.73923	10.2093
0.137917	3.46509	4.37387		0.137917	21.424	10.268	10.2646
0.138333	3.48564	4.38027		0.138333	21.4703	10.285	10.2684
0.13875	3.51163	4.27375		0.13875	21.5426	9.79884	10.3019
0.139167	3.51842	4.33125		0.139167	21.4404	10.1172	10.2536
0.139583	3.50657	4.36054		0.139583	21.3746	9.9551	10.316
0.14	3.49005	4.35573		0.14	21.3599	9.64542	10.2932
0.140417	3.51104	4.35355		0.140417	21.5446	9.72646	10.3047
0.140833	3.51956	4.40672		0.140833	21.5814	9.8323	10.347
0.14125	3.51456	4.41066		0.14125	21.6211	9.74322	10.3874
0.141667	3.54048	4.44508		0.141667	21.5393	10.1766	10.3576
0.142083	3.52959	4.43059		0.142083	21.6893	10.1902	10.3457
0.1425	3.53609	4.4588		0.1425	21.7447	9.86531	10.3366
0.142917	3.57828	4.4731		0.142917	21.7468	10.233	10.3523
0.143333	3.5872	4.45839		0.143333	21.6385	10.3029	10.3934
0.14375	3.60081	4.50413		0.14375	21.6677	9.91872	10.3659
0.144167	3.60367	4.46328		0.144167	21.6439	10.1725	10.3835
0.144583	3.59201	4.44764		0.144583	21.6439	10.415	10.3705
0.145	3.6053	4.43212		0.145	21.7811	9.99461	10.4026
0.145417	3.60834	4.44511		0.145417	21.6742	10.1621	10.4296
0.145833	3.62927	4.49318		0.145833	21.6571	10.4888	10.4726
0.14625	3.65286	4.43255		0.14625	21.7189	10.1004	10.5227
0.146667	3.61567	4.46643		0.146667	21.6908	10.1133	10.5248
0.147083	3.63363	4.47404		0.147083	21.6269	10.517	10.5788
0.1475	3.62766	4.5051		0.1475	21.5718	10.1663	10.5339
0.147917	3.62069	4.45251		0.147917	21.563	10.1013	10.5027
0.148333	3.63791	4.54112		0.148333	21.8559	10.5674	10.5173
0.14875	3.65263	4.60117		0.14875	21.9709	10.302	10.5181
0.149167	3.66215	4.5786		0.149167	22.045	10.0164	10.5702
0.149583	3.65991	4.47478		0.149583	22.0811	10.4567	10.618
0.15	3.65234	4.55218		0.15	22.1406	10.4139	10.5561
0.150417	3.68838	4.61561		0.150417	22.1349	10.0775	10.5852
0.150833	3.70791	4.56935		0.150833	22.0433	10.4457	10.6235
0.15125	3.70773	4.53135		0.15125	22.0627	10.5906	10.5939
0.151667	3.71709	4.61015		0.151667	22.0839	10.1587	10.6301
0.152083	3.71108	4.63129		0.152083	22.1988	10.2485	10.6537
0.1525	3.70033	4.60011		0.1525	22.1255	10.6386	10.6501
0.152917	3.6741	4.59483		0.152917	22.1657	10.2241	10.6735
0.153333	3.67529	4.53383		0.153333	22.3284	10.0349	10.7208
0.15375	3.71754	4.52512		0.15375	22.3045	10.5973	10.7347
0.154167	3.73089	4.53394		0.154167	22.1327	10.3394	10.7323
0.154583	3.72638	4.55904		0.154583	22.0942	10.2488	10.7239
0.155	3.71389	4.53247		0.155	22.2323	10.7104	10.7403
0.155417	3.73498	4.59051		0.155417	22.3593	10.4856	10.8226
0.155833	3.72515	4.55646		0.155833	22.3163	10.226	10.7884
0.15625	3.7224	4.52328		0.15625	22.3842	10.6792	10.8123
0.156667	3.72904	4.50689		0.156667	22.359	10.6385	10.8244
0.157083	3.74995	4.54216		0.157083	22.4276	10.2444	10.7963
0.1575	3.73566	4.60701		0.1575	22.3166	10.6246	10.7876
0.157917	3.73812	4.65935		0.157917	22.3976	10.6121	10.804
0.158333	3.7316	4.70054		0.158333	22.3416	10.2346	10.826
0.15875	3.74768	4.64236		0.15875	22.3263	10.5256	10.8466
0.159167	3.80182	4.60018		0.159167	22.3966	10.6993	10.8485
0.159583	3.80104	4.65187		0.159583	22.3451	10.284	10.8166
0.16	3.81027	4.69262		0.16	22.5007	10.5029	10.8353
0.160417	3.82401	4.62898		0.160417	22.5741	10.7164	10.8707
0.160833	3.82647	4.71042		0.160833	22.4733	10.2845	10.8591
0.16125	3.81123	4.65307		0.16125	22.3922	10.5563	10.8324
0.161667	3.83568	4.64024		0.161667	22.4995	10.8256	10.8811
0.162083	3.82979	4.68726		0.162083	22.532	10.3902	10.896
0.1625	3.82862	4.60054		0.1625	22.4759	10.5487	10.9599
0.162917	3.82576	4.64693		0.162917	22.4725	10.8489	10.9739
0.163333	3.81236	4.63844		0.163333	22.5044	10.4527	11.0465
0.16375	3.83976	4.6852		0.16375	22.733	10.5441	11.0431
0.164167	3.83223	4.61233		0.164167	22.7811	10.7137	11.0603
0.164583	3.84948	4.63654		0.164583	22.785	10.43	11.031
0.165	3.86564	4.61382		0.165	22.6038	10.4753	11.0039
0.165417	3.89983	4.67049		0.165417	22.7923	10.8602	10.9712
0.165833	3.89206	4.79552		0.165833	22.7141	10.5188	11.0095
0.16625	3.89118	4.65745		0.16625	22.5699	10.4966	11.0224
0.166667	3.91621	4.70947		0.166667	22.6534	10.8792	11.0154
0.167083	3.92949	4.74114		0.167083	22.8262	10.5086	11.1001
0.1675	3.89917	4.70613		0.1675	22.6879	10.4359	11.0863
0.167917	3.88599	4.75454		0.167917	22.7298	10.911	11.0601
0.168333	3.88463	4.60862		0.168333	22.8171	10.6135	11.0725
0.16875	3.87587	4.59024		0.16875	22.8208	10.4764	11.1197
0.169167	3.88778	4.69129		0.169167	23.0412	10.9723	11.165
0.169583	3.91951	4.71909		0.169583	23.0019	10.8224	11.1862
0.17	3.91452	4.65033		0.17	22.7807	10.4836	11.2045
0.170417	3.92393	4.6645		0.170417	22.9657	10.8916	11.1801
0.170833	3.91159	4.67078		0.170833	22.9099	10.794	11.1716
0.17125	3.91051	4.73052		0.17125	22.8987	10.5078	11.1742
0.171667	3.93749	4.84883		0.171667	22.7893	11.0047	11.212
0.172083	3.9216	4.73352		0.172083	22.8818	10.853	11.2664
0.1725	3.94799	4.70792		0.1725	23.0326	10.5525	11.2668
0.172917	3.96696	4.71183		0.172917	22.9948	11.0121	11.2899
0.173333	3.97681	4.75821		0.173333	23.0796	10.9173	11.263
0.17375	3.96593	4.8089		0.17375	23.079	10.5408	11.2658
0.174167	3.96339	4.82395		0.174167	23.0508	10.9515	11.2985
0.174583	3.95116	4.75578		0.174583	23.0364	10.9046	11.2974
0.175	3.95819	4.77356		0.175	23.1704	10.5436	11.3435
0.175417	3.97277	4.71744		0.175417	23.1652	10.9048	11.3359
0.175833	3.99224	4.78192		0.175833	23.16	11.0367	11.2957
0.17625	3.97981	4.73902		0.17625	23.265	10.6301	11.3407
0.176667	3.9661	4.78032		0.176667	23.1721	10.987	11.3531
0.177083	3.99661	4.7658		0.177083	23.2741	11.0807	11.3645
0.1775	3.96466	4.7724		0.1775	23.317	10.6462	11.3587
0.177917	3.98638	4.68315		0.177917	23.3384	10.8403	11.3911
0.178333	3.99865	4.69884		0.178333	23.4503	11.2294	11.4004
0.17875	4.02193	4.76235		0.17875	23.4083	10.8087	11.4168
0.179167	4.01833	4.74573		0.179167	23.3599	10.8789	11.3667
0.179583	4.03653	4.70024		0.179583	23.3402	11.2267	11.4265
0.18	4.01096	4.6864		0.18	23.4177	10.8769	11.4697
0.180417	4.04863	4.75224		0.180417	23.4304	10.8423	11.4749
0.180833	4.05437	4.75413		0.180833	23.3829	11.3156	11.4686
0.18125	4.02955	4.73598		0.18125	23.3969	10.9835	11.4584
0.181667	4.03902	4.75897		0.181667	23.4772	10.7676	11.5085
0.182083	4.01242	4.76611		0.182083	23.5403	11.23	11.5147
0.1825	4.02987	4.71716		0.1825	23.4967	10.9677	11.4866
0.182917	4.06617	4.73183		0.182917	23.4215	10.7446	11.5371
0.183333	4.03855	4.80377		0.183333	23.4766	11.2257	11.5766
0.18375	4.01846	4.7368		0.18375	23.6032	11.0871	11.5586
0.184167	4.02727	4.76567		0.184167	23.5992	10.7802	11.5484
0.184583	4.02994	4.74785		0.184583	23.5053	11.2401	11.5908
0.185	4.06273	4.74845		0.185	23.4923	11.1024	11.6369
0.185417	4.08548	4.76929		0.185417	23.7037	10.8067	11.6335
0.185833	4.08004	4.82776		0.185833	23.737	11.2751	11.626
0.18625	4.05134	4.78308		0.18625	23.8087	11.2706	11.6471
0.186667	4.08248	4.81098		0.186667	23.6608	10.8595	11.6515
0.187083	4.09991	4.82868		0.187083	23.665	11.2026	11.6286
0.1875	4.13086	4.74205		0.1875	23.6588	11.2437	11.6906
0.187917	4.12753	4.86371		0.187917	23.6555	10.8526	11.7347
0.188333	4.12674	4.82187		0.188333	23.6287	11.1167	11.7075
0.18875	4.13636	4.86111		0.18875	23.6215	11.327	11.7438
0.189167	4.12394	4.93731		0.189167	23.7044	10.9468	11.751
0.189583	4.10284	4.85312		0.189583	23.7038	11.1456	11.7727
0.19	4.10519	4.8229		0.19	23.7028	11.5012	11.7505
0.190417	4.08398	4.79592		0.190417	23.7968	11.0675	11.7352
0.190833	4.11904	4.79672		0.190833	23.7898	11.0964	11.7863
0.19125	4.136	4.81274		0.19125	23.8426	11.5689	11.7342
0.191667	4.15638	4.80238		0.191667	23.9417	11.1734	11.8203
0.192083	4.12232	4.81469		0.192083	24.0149	11.0751	11.806
0.1925	4.1233	4.82531		0.1925	23.9366	11.5423	11.7831
0.192917	4.15058	4.78256		0.192917	23.9543	11.1509	11.8409
0.193333	4.18522	4.84368		0.193333	23.8484	11.0734	11.8152
0.19375	4.1938	4.82415		0.19375	23.9302	11.4823	11.8444
0.194167	4.15424	4.78344		0.194167	24.0444	11.2205	11.8604
0.194583	4.16006	4.75167		0.194583	24.0795	11.0503	11.834
0.195	4.13586	4.81536		0.195	23.9653	11.555	11.8742
0.195417	4.12284	4.81233		0.195417	23.9802	11.3749	11.8783
0.195833	4.1404	4.79664		0.195833	24.0149	11.0813	11.9069
0.19625	4.15318	4.77808		0.19625	24.0355	11.5645	11.8664
0.196667	4.14284	4.76411		0.196667	24.1477	11.4204	11.8734
0.197083	4.1664	4.76641		0.197083	24.2031	11.0377	11.889
0.1975	4.18078	4.76442		0.1975	24.1743	11.5101	11.8556
0.197917	4.22029	4.78018		0.197917	24.1182	11.5943	11.8515
0.198333	4.21916	4.83856		0.198333	24.0747	11.0944	11.9639
0.19875	4.1737	4.90067		0.19875	24.0399	11.2715	11.9493
0.199167	4.18357	4.81383		0.199167	24.1173	11.6798	11.957
0.199583	4.19123	4.80983		0.199583	24.0828	11.2871	11.9672
0.2	4.19181	4.8259		0.2	24.0955	11.2149	11.9632
0.200417	4.18274	4.81128		0.200417	24.1889	11.6662	12.0134
0.200833	4.18454	4.81268		0.200833	24.261	11.3538	11.9706
0.20125	4.21262	4.80958		0.20125	24.2808	11.2602	12.0229
0.201667	4.23008	4.85994		0.201667	24.4159	11.7127	12.0429
0.202083	4.22854	4.75457		0.202083	24.3596	11.4639	12.0465
0.2025	4.21762	4.74218		0.2025	24.3879	11.252	12.042
0.202917	4.2278	4.85689		0.202917	24.3839	11.7514	12.0992
0.203333	4.24129	4.81691		0.203333	24.3662	11.5379	12.1209
0.20375	4.23512	4.7602		0.20375	24.3175	11.2212	12.1475
0.204167	4.25371	4.70908		0.204167	24.3223	11.6634	12.0921
0.204583	4.27107	4.76987		0.204583	24.3054	11.664	12.1318
0.205	4.25263	4.85554		0.205	24.3271	11.3004	12.1508
0.205417	4.26108	4.92416		0.205417	24.4202	11.6964	12.1083
0.205833	4.2543	4.84577		0.205833	24.4986	11.7231	12.1316
0.20625	4.24736	4.84408		0.20625	24.4614	11.2822	12.1746
0.206667	4.26658	4.8129		0.206667	24.5722	11.7054	12.1941
0.207083	4.26927	4.92272		0.207083	24.5609	11.8176	12.1317
0.2075	4.27974	4.9608		0.2075	24.6576	11.3706	12.1142
0.207917	4.30271	4.96793		0.207917	24.5453	11.5094	12.1105
0.208333	4.31037	4.89781		0.208333	24.4989	11.9124	12.184
0.20875	4.29936	4.87108		0.20875	24.5844	11.5743	12.2516
0.209167	4.27027	4.78897		0.209167	24.7699	11.5238	12.2339
0.209583	4.28463	4.74553		0.209583	24.7143	11.9835	12.2623
0.21	4.2569	4.77738		0.21	24.5362	11.7609	12.2689
0.210417	4.26749	4.72095		0.210417	24.6388	11.4817	12.2065
0.210833	4.24542	4.77039		0.210833	24.6455	11.9454	12.2443
0.21125	4.16907	4.80867		0.21125	24.7654	11.706	12.2671
0.211667	4.22716	4.77903		0.211667	24.7951	11.4992	12.3126
0.212083	4.26049	4.69985		0.212083	24.7882	12.0161	12.3044
0.2125	4.25777	4.70921		0.2125	24.7757	11.7099	12.3252
0.212917	4.26672	4.68373		0.212917	24.7737	11.6058	12.3283
0.213333	4.29615	4.66834		0.213333	24.9035	12.0483	12.386
0.21375	4.2971	4.78787		0.21375	24.9256	11.7217	12.3246
0.214167	4.27966	4.78748		0.214167	24.9141	11.5922	12.3265
0.214583	4.26943	4.78979		0.214583	24.9609	12.0372	12.3778
0.215	4.27892	4.74828		0.215	24.8393	11.7459	12.3847
0.215417	4.25612	4.67214		0.215417	24.9551	11.5505	12.4092
0.215833	4.28474	4.65833		0.215833	25.0023	11.8624	12.4126
0.21625	4.27656	4.69454		0.21625	25.0603	11.7915	12.3753
0.216667	4.22961	4.69932		0.216667	25.0624	11.6025	12.3752
0.217083	4.21309	4.65783		0.217083	25.0224	12.1138	12.4173
0.2175	4.20017	4.66215		0.2175	25.1093	12.0526	12.4831
0.217917	4.21403	4.62903		0.217917	25.1763	11.6969	12.5127
0.218333	4.22066	4.63303		0.218333	25.1012	12.1248	12.5333
0.21875	4.24629	4.65524		0.21875	25.0361	12.05	12.4866
0.219167	4.2341	4.61784		0.219167	25.0303	11.6888	12.4298
0.219583	4.24601	4.66251		0.219583	25.1215	12.0982	12.4905
0.22	4.2552	4.73741		0.22	25.1731	12.0622	12.5295
0.220417	4.25058	4.75074		0.220417	25.2014	11.6851	12.5152
0.220833	4.26018	4.70226		0.220833	25.125	12.0617	12.5229
0.22125	4.23885	4.69291		0.22125	25.1795	12.1605	12.5477
0.221667	4.24471	4.6857		0.221667	25.1714	11.6962	12.5748
0.222083	4.19556	4.66397		0.222083	25.1482	11.9776	12.5562
0.2225	4.22524	4.62318		0.2225	25.2302	12.1987	12.6282
0.222917	4.26042	4.63777		0.222917	25.2492	11.7403	12.5763
0.223333	4.27701	4.64158		0.223333	25.3175	12.0143	12.605
0.22375	4.25688	4.61449		0.22375	25.2976	12.2195	12.6361
0.224167	4.25362	4.6671		0.224167	25.4493	11.7779	12.7035
0.224583	4.25465	4.66284		0.224583	25.2735	11.9386	12.6449
0.225	4.26753	4.67905		0.225	25.3291	12.3741	12.6772
0.225417	4.26938	4.64956		0.225417	25.3518	11.8426	12.7038
0.225833	4.25791	4.65016		0.225833	25.3602	11.8372	12.765
0.22625	4.26109	4.6604		0.22625	25.4926	12.1823	12.7633
0.226667	4.28732	4.60918		0.226667	25.5762	11.6486	12.7591
0.227083	4.29224	4.65023		0.227083	25.5834	11.3546	12.6955
0.2275	4.28539	4.65216		0.2275	25.5763	11.4721	12.6862
0.227917	4.2866	4.71974		0.227917	25.511	11.3914	12.6876
0.228333	4.30039	4.70385		0.228333	25.5443	11.323	12.7163
0.22875	4.30586	4.6864		0.22875	25.6739	12.0425	12.7493
0.229167	4.29569	4.7392		0.229167	25.5904	12.1312	12.8128
0.229583	4.31224	4.67934		0.229583	25.5906	11.7476	12.7926
0.23	4.33612	4.64696		0.23	25.6072	12.1827	12.8039
0.230417	4.31983	4.65944		0.230417	25.6574	12.2891	12.8088
0.230833	4.32518	4.68695		0.230833	25.569	11.9234	12.8018
0.23125	4.31064	4.74418		0.23125	25.6405	12.3263	12.809
0.231667	4.33546	4.64126		0.231667	25.6558	12.4801	12.8159
0.232083	4.37603	4.64911		0.232083	25.7801	11.9938	12.813
0.2325	4.35794	4.67115		0.2325	25.602	12.2966	12.8184
0.232917	4.37753	4.68358		0.232917	25.7343	12.5799	12.866
0.233333	4.39745	4.73276		0.233333	25.8163	12.1418	12.8542
0.23375	4.38922	4.71311		0.23375	25.9063	12.1627	12.866
0.234167	4.3855	4.63948		0.234167	25.8421	12.573	12.8662
0.234583	4.41465	4.61059		0.234583	25.8408	12.2319	12.9106
0.235	4.39428	4.66621		0.235	25.8245	12.0641	12.9164
0.235417	4.40607	4.70977		0.235417	25.8193	12.5313	12.9588
0.235833	4.41155	4.66107		0.235833	25.7607	12.2273	12.9543
0.23625	4.42526	4.64846		0.23625	25.928	12.1824	12.9703
0.236667	4.45644	4.66815		0.236667	25.9138	12.5941	12.9506
0.237083	4.45842	4.65056		0.237083	26.0216	12.2315	13.0324
0.2375	4.44322	4.62094		0.2375	25.9458	12.1086	13.0326
0.237917	4.44909	4.64341		0.237917	26.0037	12.5978	12.9847
0.238333	4.45687	4.62873		0.238333	25.9159	12.341	12.986
0.23875	4.46014	4.6252		0.23875	25.8425	12.0839	12.9976
0.239167	4.44677	4.68432		0.239167	25.9032	12.5945	13.0343
0.239583	4.47368	4.69143		0.239583	25.9483	12.5252	13.0678
0.24	4.49688	4.67733		0.24	25.8694	12.1208	13.0992
0.240417	4.46446	4.68065		0.240417	25.8384	12.5683	13.1141
0.240833	4.50396	4.66417		0.240833	26.1323	12.6241	13.0909
0.24125	4.50988	4.73915		0.24125	26.1743	12.1465	13.1371
0.241667	4.51464	4.7349		0.241667	26.315	12.3988	13.0645
0.242083	4.52008	4.73904		0.242083	26.226	12.6829	13.0384
0.2425	4.49128	4.65604		0.2425	26.2655	12.2154	13.1437
0.242917	4.50631	4.69223		0.242917	26.2023	12.31	13.1189
0.243333	4.50862	4.73012		0.243333	26.2052	12.694	13.1605
0.24375	4.52154	4.74968		0.24375	26.1844	12.3608	13.1022
0.244167	4.51707	4.76285		0.244167	26.2707	12.2296	13.1729
0.244583	4.52867	4.71366		0.244583	26.3664	12.6934	13.1672
0.245	4.54222	4.69112		0.245	26.3878	12.5486	13.1208
0.245417	4.56044	4.73605		0.245417	26.3591	12.1924	13.1479
0.245833	4.55816	4.75149		0.245833	26.4045	12.7084	13.1705
0.24625	4.55549	4.75427		0.24625	26.3876	12.6687	13.1895
0.246667	4.54432	4.73136		0.246667	26.3741	12.2207	13.2002
0.247083	4.53509	4.67506		0.247083	26.4575	12.6019	13.1925
0.2475	4.54422	4.67579		0.2475	26.5741	12.6826	13.2063
0.247917	4.54249	4.73028		0.247917	26.6939	12.2843	13.2152
0.248333	4.54827	4.73241		0.248333	26.594	12.7031	13.2535
0.24875	4.54853	4.71301		0.24875	26.5255	12.7374	13.2093
0.249167	4.56056	4.67054		0.249167	26.5755	12.2689	13.3002
0.249583	4.55346	4.69577		0.249583	26.5627	12.6151	13.3036
0.25	4.56407	4.72389		0.25	26.6809	12.8119	13.3437
0.250417	4.55714	4.69396		0.250417	26.7301	12.3522	13.3471
0.250833	4.58595	4.67431		0.250833	26.7648	12.5889	13.3259
0.25125	4.59684	4.71726		0.25125	26.7197	12.8761	13.3832
0.251667	4.60099	4.71891		0.251667	26.8289	12.3899	13.3708
0.252083	4.6192	4.69641		0.252083	26.689	12.5164	13.3466
0.2525	4.59888	4.68154		0.2525	26.6007	12.9025	13.3689
0.252917	4.59635	4.70112		0.252917	26.6975	12.44	13.403
0.253333	4.59584	4.69467		0.253333	26.7977	12.6495	13.3805
0.25375	4.60825	4.72017		0.25375	26.6802	12.9123	13.3553
0.254167	4.65322	4.85508		0.254167	26.7459	12.4519	13.3949
0.254583	4.63565	4.82259		0.254583	26.8156	12.6633	13.4185
0.255	4.64863	4.79366		0.255	26.8006	13.0187	13.4159
0.255417	4.63517	4.75219		0.255417	27.0267	12.5377	13.4408
0.255833	4.6343	4.76509		0.255833	26.946	12.4352	13.4356
0.25625	4.62463	4.74234		0.25625	26.8864	12.9736	13.4024
0.256667	4.64538	4.74912		0.256667	26.8501	12.7388	13.4694
0.257083	4.65517	4.72033		0.257083	26.8251	12.6394	13.4915
0.2575	4.6795	4.77344		0.2575	27.0166	13.0906	13.5084
0.257917	4.66924	4.74388		0.257917	27.0295	12.8479	13.473
0.258333	4.65171	4.68141		0.258333	27.1399	12.5931	13.5255
0.25875	4.66668	4.72461		0.25875	27.2832	13.0199	13.5129
0.259167	4.65501	4.68822		0.259167	27.1974	12.8432	13.5763
0.259583	4.63216	4.6836		0.259583	27.25	12.5887	13.5862
0.26	4.6654	4.72878		0.26	27.1067	13.0622	13.5597
0.260417	4.68748	4.71007		0.260417	27.2821	12.8917	13.5689
0.260833	4.70648	4.70008		0.260833	27.2221	12.6429	13.6186
0.26125	4.70628	4.70575		0.26125	27.2075	13.1126	13.6147
0.261667	4.71137	4.68549		0.261667	27.3023	12.8576	13.6257
0.262083	4.71857	4.70605		0.262083	27.4445	12.6582	13.6326
0.2625	4.68393	4.66119		0.2625	27.3488	13.1884	13.6766
0.262917	4.64277	4.74495		0.262917	27.3289	12.9793	13.6445
0.263333	4.65396	4.75378		0.263333	27.2134	12.7203	13.6812
0.26375	4.66654	4.79536		0.26375	27.283	13.191	13.6643
0.264167	4.66861	4.70235		0.264167	27.2541	12.988	13.7405
0.264583	4.68365	4.74053		0.264583	27.3262	12.7297	13.7254
0.265	4.72413	4.66298		0.265	27.2573	13.1995	13.7151
0.265417	4.74545	4.66761		0.265417	27.3612	13.1351	13.698
0.265833	4.74456	4.64424		0.265833	27.2598	12.7473	13.7637
0.26625	4.74323	4.67427		0.26625	27.2707	13.1822	13.7721
0.266667	4.74295	4.69606		0.266667	27.4074	12.9915	13.7669
0.267083	4.7396	4.70694		0.267083	27.4248	12.7918	13.7873
0.2675	4.75492	4.76405		0.2675	27.379	13.3299	13.8463
0.267917	4.75698	4.7414		0.267917	27.4099	13.1303	13.8547
0.268333	4.72393	4.74504		0.268333	27.3055	12.7966	13.823
0.26875	4.69345	4.72206		0.26875	27.3632	13.2709	13.8064
0.269167	4.69904	4.78289		0.269167	27.4237	13.248	13.8133
0.269583	4.70158	4.72869		0.269583	27.5036	12.8375	13.8299
0.27	4.7175	4.75267		0.27	27.4925	13.2831	13.847
0.270417	4.72939	4.7153		0.270417	27.6308	13.4023	13.8906
0.270833	4.74203	4.72996		0.270833	27.6117	12.9062	13.8873
0.27125	4.7503	4.71776		0.27125	27.5448	13.2073	13.8568
0.271667	4.78182	4.68129		0.271667	27.6723	13.4216	13.8775
0.272083	4.76408	4.65474		0.272083	27.6999	13.018	13.9042
0.2725	4.76196	4.63671		0.2725	27.7849	13.062	13.9432
0.272917	4.78728	4.67163		0.272917	27.7521	13.4535	13.9416
0.273333	4.75474	4.69118		0.273333	27.7581	13.1094	13.9592
0.27375	4.74441	4.66113		0.27375	27.7967	13.0522	14.0008
0.274167	4.77766	4.67181		0.274167	27.8722	13.5196	14.0323
0.274583	4.77342	4.6629		0.274583	28.0635	13.2355	14.056
0.275	4.75244	4.75405		0.275	28.1559	13.201	14.0257
0.275417	4.77391	4.67767		0.275417	28.2556	13.5677	14.0244
0.275833	4.754	4.72973		0.275833	28.2493	13.1415	14.0212
0.27625	4.76396	4.74604		0.27625	28.1523	13.0689	13.989
0.276667	4.80759	4.71204		0.276667	28.1978	13.5185	14.0158
0.277083	4.81953	4.75591		0.277083	28.2684	13.3181	14.0374
0.2775	4.81357	4.70963		0.2775	28.2927	13.0511	14.0474
0.277917	4.80352	4.7264		0.277917	28.189	13.5465	14.0532
0.278333	4.79347	4.7197		0.278333	28.1598	13.3713	14.0508
0.27875	4.81546	4.67441		0.27875	28.2508	13.0626	14.1256
0.279167	4.81448	4.78768		0.279167	28.2224	13.5674	14.1121
0.279583	4.84727	4.70162		0.279583	28.2364	13.4593	14.1172
0.28	4.84006	4.75365		0.28	28.2803	13.0354	14.1233
0.280417	4.84141	4.75953		0.280417	28.4044	13.4173	14.1577
0.280833	4.83385	4.75635		0.280833	28.3973	13.6956	14.1795
0.28125	4.85145	4.71315		0.28125	28.3686	13.2435	14.1837
0.281667	4.83046	4.7475		0.281667	28.4198	13.2987	14.1948
0.282083	4.83269	4.69038		0.282083	28.5456	13.7276	14.1935
0.2825	4.8543	4.72178		0.2825	28.6237	13.3564	14.2107
0.282917	4.84216	4.66688		0.282917	28.6893	13.3414	14.2601
0.283333	4.84327	4.73797		0.283333	28.6598	13.7643	14.2626
0.28375	4.84339	4.72865		0.28375	28.6088	13.5179	14.272
0.284167	4.86187	4.70543		0.284167	28.5953	13.2832	14.2945
0.284583	4.85002	4.70081		0.284583	28.6658	13.7411	14.2831
0.285	4.85294	4.68237		0.285	28.6377	13.4416	14.3076
0.285417	4.87854	4.69415		0.285417	28.817	13.3445	14.3222
0.285833	4.88146	4.70587		0.285833	28.7759	13.8299	14.3111
0.28625	4.87177	4.78746		0.28625	28.8068	13.5347	14.3402
0.286667	4.88312	4.72169		0.286667	28.8177	13.2961	14.3935
0.287083	4.87791	4.72911		0.287083	28.8359	13.7896	14.4392
0.2875	4.88669	4.74598		0.2875	28.8464	13.7038	14.4406
0.287917	4.86316	4.74358		0.287917	28.9909	13.2935	14.4381
0.288333	4.8599	4.72559		0.288333	29.034	13.7028	14.4157
0.28875	4.88963	4.70522		0.28875	28.9916	13.8399	14.3943
0.289167	4.90603	4.67993		0.289167	28.9573	13.3841	14.4067
0.289583	4.87953	4.71025		0.289583	28.9468	13.631	14.4441
0.29	4.87428	4.74363		0.29	29.0284	13.994	14.4594
0.290417	4.86836	4.7706		0.290417	29.0584	13.5571	14.5155
0.290833	4.8717	4.71825		0.290833	28.9969	13.573	14.5007
0.29125	4.88228	4.70054		0.29125	29.1564	14.0057	14.4927
0.291667	4.89803	4.65652		0.291667	29.2222	13.5853	14.5607
0.292083	4.89818	4.74197		0.292083	29.1983	13.5629	14.5805
0.2925	4.91442	4.73604		0.2925	29.2073	14.0599	14.5578
0.292917	4.94181	4.72327		0.292917	29.115	13.8063	14.5353
0.293333	4.9678	4.70056		0.293333	29.2182	13.5484	14.555
0.29375	4.97572	4.74403		0.29375	29.324	14.0257	14.5701
0.294167	4.95931	4.73605		0.294167	29.4274	13.9052	14.5815
0.294583	4.95421	4.69646		0.294583	29.4307	13.4287	14.6013
0.295	4.97815	4.69005		0.295	29.3039	13.8439	14.6413
0.295417	4.96241	4.70887		0.295417	29.3024	13.9089	14.656
0.295833	4.95129	4.70912		0.295833	29.4124	13.474	14.6553
0.29625	4.916	4.68411		0.29625	29.3804	13.8992	14.6945
0.296667	4.92123	4.74912		0.296667	29.4203	13.9452	14.6622
0.297083	4.93769	4.70473		0.297083	29.4653	13.517	14.6765
0.2975	4.95613	4.70348		0.2975	29.508	13.9265	14.6738
0.297917	4.94745	4.70017		0.297917	29.4039	13.9952	14.6823
0.298333	4.96618	4.7365		0.298333	29.5575	13.5255	14.6822
0.29875	4.95514	4.7461		0.29875	29.5694	13.8808	14.6856
0.299167	4.96047	4.70693		0.299167	29.6986	14.1674	14.6954
0.299583	4.94205	4.66189		0.299583	29.6423	13.6854	14.7099
0.3	4.94969	4.77065		0.3	29.7116	13.7635	14.7564
0.300417	4.96737	4.787		0.300417	29.7121	14.2371	14.7951
0.300833	4.99153	4.74331		0.300833	29.6744	13.9606	14.8099
0.30125	4.98283	4.66903		0.30125	29.6883	13.7123	14.8243
0.301667	4.97132	4.67353		0.301667	29.7458	14.2304	14.8099
0.302083	4.98374	4.6719		0.302083	29.9212	14.0453	14.8068
0.3025	4.98417	4.68318		0.3025	29.9197	13.7482	14.8023
0.302917	4.99739	4.71644		0.302917	29.833	14.216	14.8353
0.303333	5.01543	4.69408		0.303333	29.7681	14.0123	14.8262
0.30375	5.02325	4.76093		0.30375	29.9121	13.8099	14.853
0.304167	4.99775	4.70995		0.304167	29.9239	14.3054	14.851
0.304583	4.97124	4.6665		0.304583	30.0143	14.1173	14.8568
0.305	4.989	4.69451		0.305	30.0171	13.9063	14.8858
0.305417	5.0204	4.71722		0.305417	30.0536	14.4087	14.8964
0.305833	5.00599	4.71848		0.305833	30.0892	14.1708	14.9147
0.30625	5.01829	4.68615		0.30625	30.0398	13.8661	14.9336
0.306667	5.01672	4.73914		0.306667	30.073	14.3511	14.9376
0.307083	5.02273	4.6614		0.307083	30.2034	14.3024	14.9836
0.3075	5.00428	4.6592		0.3075	30.1642	13.9016	14.993
0.307917	5.0349	4.69196		0.307917	30.2565	14.3089	15.0287
0.308333	5.04408	4.69529		0.308333	30.3196	14.4314	15.031
0.30875	4.99769	4.70318		0.30875	30.3011	13.9012	15.0616
0.309167	4.96063	4.66288		0.309167	30.2643	14.0302	15.053
0.309583	4.98003	4.70197		0.309583	30.3228	14.5004	15.0648
0.31	4.96918	4.68756		0.31	30.36	14.2655	15.0733
0.310417	4.97125	4.67529		0.310417	30.3893	14.0171	15.1031
0.310833	4.99633	4.69133		0.310833	30.3923	14.5007	15.0754
0.31125	5.01642	4.65085		0.31125	30.3751	14.2756	15.0619
0.311667	5.00886	4.63194		0.311667	30.4577	13.9762	15.1216
0.312083	5.02177	4.69891		0.312083	30.4598	14.4343	15.1141
0.3125	5.02991	4.64451		0.3125	30.5614	14.3845	15.0962
0.312917	5.03756	4.6894		0.312917	30.5718	13.9333	15.1084
0.313333	5.0362	4.68914		0.313333	30.5249	14.2995	15.1582
0.31375	5.00915	4.70239		0.31375	30.4989	14.5115	15.1552
0.314167	5.01842	4.71582		0.314167	30.6043	14.0487	15.1471
0.314583	5.02234	4.70042		0.314583	30.6935	14.3464	15.1742
0.315	5.02886	4.70416		0.315	30.6987	14.5808	15.1711
0.315417	5.02787	4.71579		0.315417	30.7334	14.1058	15.2181
0.315833	5.03486	4.67042		0.315833	30.6715	14.2152	15.2728
0.31625	5.05098	4.67363		0.31625	30.7398	14.6141	15.2826
0.316667	5.04966	4.65286		0.316667	30.7764	14.2149	15.2999
0.317083	5.03557	4.74195		0.317083	30.9143	14.2333	15.2811
0.3175	5.02728	4.71194		0.3175	30.8632	14.7204	15.2882
0.317917	5.05357	4.69558		0.317917	30.892	14.5279	15.3062
0.318333	5.04759	4.64062		0.318333	30.9327	14.2266	15.3256
0.31875	5.02886	4.62265		0.31875	30.9341	14.6965	15.3364
0.319167	5.04094	4.74095		0.319167	31.1029	14.6109	15.3423
0.319583	5.06321	4.62236		0.319583	31.0288	14.1902	15.3397
0.32	5.06833	4.6643		0.32	31.0355	14.5551	15.3489
0.320417	5.06497	4.63016		0.320417	31.087	14.8088	15.348
0.320833	5.0698	4.69692		0.320833	31.1489	14.3069	15.4044
0.32125	5.07002	4.70948		0.32125	31.05	14.3603	15.4337
0.321667	5.06299	4.67893		0.321667	31.1504	14.769	15.4161
0.322083	5.05187	4.6852		0.322083	31.3225	14.3731	15.4634
0.3225	5.08369	4.64334		0.3225	31.2788	14.37	15.4698
0.322917	5.10143	4.68902		0.322917	31.2993	14.8251	15.4709
0.323333	5.11111	4.6632		0.323333	31.3727	14.5263	15.4562
0.32375	5.12085	4.60689		0.32375	31.4301	14.3077	15.4756
0.324167	5.11183	4.7357		0.324167	31.4035	14.7516	15.5039
0.324583	5.09726	4.65392		0.324583	31.4351	14.639	15.5144
0.325	5.12389	4.6601		0.325	31.4879	14.3095	15.5378
0.325417	5.12204	4.74244		0.325417	31.5306	14.7143	15.5866
0.325833	5.10408	4.70449		0.325833	31.5002	14.8544	15.5707
0.32625	5.1016	4.69294		0.32625	31.4415	14.3642	15.5806
0.326667	5.10967	4.6767		0.326667	31.4996	14.5518	15.5677
0.327083	5.10051	4.65495		0.327083	31.5754	14.9256	15.5915
0.3275	5.10604	4.66501		0.3275	31.7507	14.5952	15.6242
0.327917	5.11572	4.68319		0.327917	31.6693	14.4741	15.6579
0.328333	5.12959	4.66917		0.328333	31.692	14.9583	15.6429
0.32875	5.13398	4.63708		0.32875	31.7014	14.7773	15.6979
0.329167	5.10978	4.59887		0.329167	31.7606	14.4371	15.7025
0.329583	5.13014	4.62518		0.329583	31.771	14.8826	15.6909
0.33	5.15661	4.69235		0.33	31.8807	14.8827	15.7034
0.330417	5.15946	4.68742		0.330417	31.7964	14.4307	15.7129
0.330833	5.14692	4.65577		0.330833	31.8457	14.7712	15.7182
0.33125	5.15538	4.66416		0.33125	31.8706	14.9921	15.7296
0.331667	5.13601	4.66611		0.331667	31.8146	14.5246	15.744
0.332083	5.13385	4.58888		0.332083	31.8394	14.6869	15.8003
0.3325	5.14465	4.54472		0.3325	31.9001	15.0841	15.7885
0.332917	5.15566	4.59796		0.332917	31.9779	14.6652	15.7878
0.333333	5.14827	4.60707		0.333333	32.0886	14.7249	15.7747
0.33375	5.1282	4.60348		0.33375	32.2079	15.1717	15.7652
0.334167	5.13386	4.67834		0.334167	32.2599	14.9311	15.7892
0.334583	5.14238	4.66618		0.334583	32.238	14.5906	15.8095
0.335	5.15958	4.59534		0.335	32.2673	15.1086	15.8305
0.335417	5.16331	4.67334		0.335417	32.3876	14.9786	15.8106
0.335833	5.16829	4.67115		0.335833	32.3341	14.5945	15.7856
0.33625	5.14553	4.62668		0.33625	32.3991	15.0415	15.8087
0.336667	5.1572	4.60242		0.336667	32.2888	15.2932	15.8143
0.337083	5.13724	4.61607		0.337083	32.4786	14.7681	15.8072
0.3375	5.16514	4.68346		0.3375	32.4977	14.9375	15.8025
0.337917	5.19128	4.67053		0.337917	32.5109	15.3382	15.8498
0.338333	5.19161	4.71175		0.338333	32.4532	15.0505	15.8681
0.33875	5.20064	4.67735		0.33875	32.5856	14.7782	15.8678
0.339167	5.21024	4.68557		0.339167	32.5785	15.2579	15.9046
0.339583	5.19659	4.657		0.339583	32.6214	15.1294	15.9316
0.34	5.16827	4.65184		0.34	32.617	14.7576	15.9541
0.340417	5.17639	4.65428		0.340417	32.6675	15.2051	15.966
0.340833	5.18159	4.63805		0.340833	32.6592	15.3228	16.0086
0.34125	5.19694	4.70087		0.34125	32.8395	14.8211	16.0481
0.341667	5.19076	4.62236		0.341667	32.7812	15.044	16.0409
0.342083	5.18859	4.63305		0.342083	32.7928	15.3959	16.0188
0.3425	5.18466	4.65417		0.3425	32.8171	15.0565	16.0304
0.342917	5.19484	4.66134		0.342917	32.8357	15.029	16.0404
0.343333	5.18369	4.62869		0.343333	32.8682	15.4567	16.0791
0.34375	5.17437	4.63776		0.34375	32.9074	15.1662	16.0972
0.344167	5.18197	4.57289		0.344167	33.027	14.9037	16.1154
0.344583	5.19816	4.58629		0.344583	32.9475	15.4004	16.1558
0.345	5.1987	4.59871		0.345	33.0185	15.2594	16.1449
0.345417	5.18308	4.61108		0.345417	33.0316	14.932	16.1689
0.345833	5.19163	4.62417		0.345833	33.0554	15.4352	16.1985
0.34625	5.22746	4.6207		0.34625	33.0406	15.3213	16.1795
0.346667	5.21013	4.6286		0.346667	33.1003	14.9796	16.186
0.347083	5.21201	4.67408		0.347083	33.0682	15.4284	16.1999
0.3475	5.21835	4.63812		0.3475	33.1072	15.4644	16.1975
0.347917	5.20982	4.67549		0.347917	33.138	15.0213	16.2034
0.348333	5.20372	4.70381		0.348333	33.2769	15.2628	16.2158
0.34875	5.21758	4.63531		0.34875	33.2911	15.6079	16.2179
0.349167	5.20678	4.58058		0.349167	33.2409	15.1531	16.2374
0.349583	5.19788	4.61342		0.349583	33.2991	15.2099	16.2587
0.35	5.193	4.62374		0.35	33.3905	15.6132	16.294
0.350417	5.22545	4.62045		0.350417	33.471	15.1932	16.3008
0.350833	5.25822	4.61266		0.350833	33.5852	15.3206	16.3115
0.35125	5.24981	4.62631		0.35125	33.5778	15.6783	16.3285
0.351667	5.24052	4.61813		0.351667	33.5597	15.3469	16.3438
0.352083	5.2463	4.596		0.352083	33.4684	15.2249	16.2956
0.3525	5.26688	4.55004		0.3525	33.5615	15.697	16.3389
0.352917	5.26126	4.58244		0.352917	33.6574	15.4293	16.3211
0.353333	5.26963	4.59855		0.353333	33.7771	15.3649	16.3535
0.35375	5.25377	4.61618		0.35375	33.8188	15.7854	16.3672
0.354167	5.25393	4.65436		0.354167	33.8453	15.5132	16.3775
0.354583	5.27251	4.61095		0.354583	33.8997	15.2317	16.3722
0.355	5.25088	4.59158		0.355	33.865	15.7081	16.3984
0.355417	5.22207	4.63387		0.355417	33.8545	15.7487	16.4085
0.355833	5.23881	4.58721		0.355833	33.9043	15.262	16.4379
0.35625	5.24804	4.58569		0.35625	33.922	15.3403	16.4567
0.356667	5.24836	4.61161		0.356667	33.9799	15.8451	16.4957
0.357083	5.23687	4.60813		0.357083	33.915	15.5743	16.5244
0.3575	5.23702	4.6176		0.3575	34.0226	15.3027	16.543
0.357917	5.25536	4.69288		0.357917	34.0553	15.8093	16.5622
0.358333	5.27387	4.63739		0.358333	34.0536	15.7815	16.5844
0.35875	5.29125	4.5834		0.35875	34.1499	15.3689	16.572
0.359167	5.27252	4.54879		0.359167	34.0629	15.8391	16.6007
0.359583	5.26645	4.57445		0.359583	34.168	15.9952	16.5977
0.36	5.27566	4.6243		0.36	34.3002	15.5029	16.5854
0.360417	5.25536	4.60309		0.360417	34.3	15.6001	16.582
0.360833	5.25973	4.66854		0.360833	34.3399	16.0131	16.6457
0.36125	5.2905	4.55778		0.36125	34.2842	15.6375	16.6761
0.361667	5.27559	4.59811		0.361667	34.3222	15.4414	16.7118
0.362083	5.26667	4.64539		0.362083	34.3739	15.9341	16.7272
0.3625	5.29151	4.61959		0.3625	34.3715	15.9628	16.7184
0.362917	5.30942	4.67501		0.362917	34.4093	15.5102	16.7338
0.363333	5.31431	4.62194		0.363333	34.6156	15.9242	16.7176
0.36375	5.30595	4.58658		0.36375	34.5821	16.0432	16.741
0.364167	5.28564	4.56518		0.364167	34.6745	15.6099	16.7783
0.364583	5.29096	4.59718		0.364583	34.6505	15.9557	16.7909
0.365	5.31949	4.65134		0.365	34.7693	16.1601	16.7843
0.365417	5.35474	4.58235		0.365417	34.7958	15.6332	16.8025
0.365833	5.32905	4.57452		0.365833	34.8782	15.8659	16.8413
0.36625	5.32699	4.58638		0.36625	34.8563	16.2172	16.8839
0.366667	5.32596	4.58754		0.366667	34.7917	15.8457	16.8985
0.367083	5.33868	4.59585		0.367083	34.9002	15.7221	16.9115
0.3675	5.35102	4.66637		0.3675	34.8682	16.2417	16.9278
0.367917	5.3328	4.60346		0.367917	35.0069	16.0713	16.9233
0.368333	5.32786	4.67233		0.368333	34.9542	15.7147	16.8891
0.36875	5.3241	4.55768		0.36875	35.0181	16.2041	16.9078
0.369167	5.31915	4.58163		0.369167	35.0952	16.1803	16.9124
0.369583	5.31556	4.58209		0.369583	35.0906	15.8369	16.9509
0.37	5.33659	4.57481		0.37	35.0648	16.3213	16.9575
0.370417	5.33766	4.588		0.370417	35.1602	16.2438	16.9623
0.370833	5.3304	4.61552		0.370833	35.2509	15.8195	16.9701
0.37125	5.33045	4.58625		0.37125	35.2476	16.2655	17.023
0.371667	5.31704	4.5276		0.371667	35.3064	16.4152	17.0356
0.372083	5.32444	4.57245		0.372083	35.3029	15.9692	17.0705
0.3725	5.34272	4.55215		0.3725	35.3235	15.9765	17.0976
0.372917	5.34516	4.57128		0.372917	35.4043	16.4134	17.0998
0.373333	5.33144	4.56805		0.373333	35.5419	16.1987	17.1077
0.37375	5.3163	4.54699		0.37375	35.4979	15.9299	17.1392
0.374167	5.3004	4.57507		0.374167	35.5311	16.3326	17.1434
0.374583	5.30604	4.56035		0.374583	35.4952	16.3983	17.1517
0.375	5.33825	4.59317		0.375	35.653	15.9622	17.1735
0.375417	5.35067	4.52553		0.375417	35.6854	16.2134	17.1793
0.375833	5.36867	4.55484		0.375833	35.7399	16.562	17.2004
0.37625	5.36363	4.51919		0.37625	35.7741	16.1493	17.2183
0.376667	5.35166	4.57202		0.376667	35.9302	15.9464	17.2179
0.377083	5.36319	4.63641		0.377083	35.9427	16.4509	17.2231
0.3775	5.36239	4.59553		0.3775	35.9967	16.4956	17.2492
0.377917	5.36119	4.59852		0.377917	35.9979	16.0542	17.2756
0.378333	5.36786	4.61468		0.378333	36.0288	16.3311	17.2884
0.37875	5.35705	4.54932		0.37875	36.0293	16.6405	17.2925
0.379167	5.35472	4.56116		0.379167	36.1402	16.2848	17.3207
0.379583	5.34953	4.58682		0.379583	36.1817	16.1953	17.3432
0.38	5.35625	4.56587		0.38	36.276	16.6347	17.384
0.380417	5.36479	4.52355		0.380417	36.3216	16.4078	17.3165
0.380833	5.37624	4.53756		0.380833	36.4396	16.1038	17.2525
0.38125	5.38075	4.55912		0.38125	36.3381	16.5849	17.1978
0.381667	5.38199	4.53561		0.381667	36.3591	16.6344	17.2815
0.382083	5.38392	4.56442		0.382083	36.4279	16.1917	17.252
0.3825	5.40569	4.56382		0.3825	36.5125	16.5242	17.1565
0.382917	5.38864	4.56446		0.382917	36.5718	16.8431	16.7113
0.383333	5.38148	4.56896		0.383333	36.4445	16.3429	16.3996
0.38375	5.37228	4.56293		0.38375	36.5641	16.4074	16.7041
0.384167	5.39249	4.53491		0.384167	36.5801	16.8314	16.7751
0.384583	5.38851	4.56255		0.384583	36.6699	16.6243	16.8705
0.385	5.38078	4.53426		0.385	36.6181	16.3188	16.888
0.385417	5.40419	4.57624		0.385417	36.7852	16.7861	16.0811
0.385833	5.38339	4.59402		0.385833	36.7785	16.9626	15.4858
0.38625	5.41161	4.59038		0.38625	36.848	16.5403	13.8066
0.386667	5.43482	4.54366		0.386667	36.846	16.5207	11.4304
0.387083	5.43555	4.56544		0.387083	36.8477	17.0167	2.03716
0.3875	5.42796	4.52803		0.3875	36.9044	16.8433	2.2666
0.387917	5.41555	4.57541		0.387917	37.0103	16.4332	2.46554
0.388333	5.40178	4.5261		0.388333	37.0717	16.8522	2.52549
0.38875	5.38761	4.47241		0.38875	37.0282	16.9431	2.61729
0.389167	5.40561	4.50505		0.389167	37.12	16.4605	2.70168
0.389583	5.41968	4.58182		0.389583	37.199	16.7768	2.80424
0.39	5.43925	4.57678		0.39	37.3212	16.8387	2.84411
0.390417	5.432	4.58006		0.390417	37.3037	16.4187	3.03459
0.390833	5.43309	4.57857		0.390833	37.2946	16.7149	3.12524
0.39125	5.44077	4.57008		0.39125	37.4425	17.0259	3.2532
0.391667	5.41828	4.58078		0.391667	37.52	16.5931	3.43328
0.392083	5.39278	4.51409		0.392083	37.5896	16.5692	3.35771
0.3925	5.39595	4.55101		0.3925	37.5349	17.0699	3.43073
0.392917	5.4075	4.58864		0.392917	37.5734	16.8835	3.52283
0.393333	5.43072	4.57648		0.393333	37.7382	16.5574	3.48935
0.39375	5.43461	4.52268		0.39375	37.7084	17.0535	3.85014
0.394167	5.45087	4.54563		0.394167	37.6658	17.0182	3.7966
0.394583	5.45215	4.53244		0.394583	37.8783	16.6646	3.77032
0.395	5.44596	4.51582		0.395	37.8939	17.1408	3.72819
0.395417	5.43802	4.52925		0.395417	38.0465	17.0909	3.81108
0.395833	5.45186	4.55156		0.395833	37.931	16.6896	3.73616
0.39625	5.47219	4.54032		0.39625	37.9376	17.1702	3.92198
0.396667	5.45147	4.51014		0.396667	38.0333	17.1231	4.12891
0.397083	5.44448	4.56202		0.397083	38.0678	16.7665	4.26065
0.3975	5.42633	4.50781		0.3975	38.0163	17.2095	4.22794
0.397917	5.43269	4.51913		0.397917	38.1291	17.1648	4.27006
0.398333	5.42568	4.47857		0.398333	38.1148	16.739	4.34969
0.39875	5.45297	4.505		0.39875	38.0811	17.0877	4.40041
0.399167	5.44495	4.59664		0.399167	38.1114	17.3196	4.40847
0.399583	5.43856	4.5945		0.399583	38.2383	16.9287	4.65983
0.4	5.43169	4.55043		0.4	38.3651	17.0559	4.67473
0.400417	5.42529	4.57629		0.400417	38.3313	17.4203	4.70919
0.400833	5.43646	4.51567		0.400833	38.4828	17.0535	4.83598
0.40125	5.43709	4.52091		0.40125	38.4163	16.9758	4.87418
0.401667	5.43842	4.49073		0.401667	38.4541	17.3919	4.80276
0.402083	5.43751	4.57199		0.402083	38.5101	17.0799	4.98081
0.4025	5.45091	4.55623		0.4025	38.6279	16.7975	5.00704
0.402917	5.44942	4.48173		0.402917	38.7108	17.2159	5.1302
0.403333	5.44857	4.51233		0.403333	38.6965	17.3515	5.21264
0.40375	5.45109	4.52362		0.40375	38.7112	16.9672	5.19828
0.404167	5.45369	4.52095		0.404167	38.65	17.238	5.20311
0.404583	5.48456	4.509		0.404583	38.7574	17.5025	5.25217
0.405	5.48757	4.53556		0.405	38.8384	17.0945	5.50802
0.405417	5.48914	4.53255		0.405417	38.8471	17.1965	5.78706
0.405833	5.49142	4.5159		0.405833	38.8898	17.5399	5.79205
0.40625	5.49415	4.55791		0.40625	38.966	17.1288	5.72643
0.406667	5.51402	4.5427		0.406667	38.9935	17.2704	5.7782
0.407083	5.50955	4.54471		0.407083	39.0564	17.6515	5.77797
0.4075	5.49465	4.5437		0.4075	39.1141	17.3331	6.01909
0.407917	5.48647	4.484		0.407917	39.056	17.1723	6.14674
0.408333	5.48218	4.50315		0.408333	39.159	17.6395	5.94274
0.40875	5.47056	4.48896		0.40875	39.2242	17.4327	5.8954
0.409167	5.46883	4.49424		0.409167	39.2544	17.1597	6.12173
0.409583	5.48787	4.50088		0.409583	39.3804	17.6152	6.26021
0.41	5.49531	4.47726		0.41	39.3717	17.7203	6.28034
0.410417	5.50695	4.52987		0.410417	39.3902	17.26	6.22638
0.410833	5.5073	4.52781		0.410833	39.5494	17.3182	6.78341
0.41125	5.49264	4.51001		0.41125	39.7112	17.7667	6.92054
0.411667	5.47528	4.5258		0.411667	39.6216	17.5245	6.79914
0.412083	5.49079	4.52182		0.412083	39.7267	17.2654	6.8962
0.4125	5.50132	4.52158		0.4125	39.782	17.7336	6.87994
0.412917	5.50378	4.52805		0.412917	39.7072	17.7931	6.94205
0.413333	5.50756	4.50256		0.413333	39.8342	17.4109	7.28461
0.41375	5.49252	4.57127		0.41375	39.8484	17.5263	7.1666
0.414167	5.51765	4.55789		0.414167	39.9141	17.9237	7.14266
0.414583	5.50691	4.49607		0.414583	39.9792	17.5741	7.07447
0.415	5.49882	4.51506		0.415	40.0649	17.3763	6.83555
0.415417	5.49538	4.51413		0.415417	40.0176	17.8114	6.6829
0.415833	5.49424	4.52182		0.415833	40.0337	17.6437	6.70531
0.41625	5.5171	4.49289		0.41625	40.1975	17.2827	6.79315
0.416667	5.52402	4.52241		0.416667	40.2362	17.6269	6.9169
0.417083	5.52793	4.51941		0.417083	40.2856	17.8141	6.58443
0.4175	5.51292	4.52273		0.4175	40.2813	17.3547	6.48152
0.417917	5.50543	4.50138		0.417917	40.3256	17.5141	6.66647
0.418333	5.49837	4.52061		0.418333	40.4178	17.9441	6.72888
0.41875	5.52492	4.51949		0.41875	40.3984	17.6151	7.00549
0.419167	5.5384	4.49662		0.419167	40.4263	17.4052	7.39816
0.419583	5.5333	4.47929		0.419583	40.4343	17.8734	7.54649
0.42	5.54565	4.4667		0.42	40.4211	17.7694	7.39093
0.420417	5.54349	4.48301		0.420417	40.5134	17.4186	7.39732
0.420833	5.54517	4.51305		0.420833	40.6148	17.7983	7.18285
0.42125	5.53517	4.47422		0.42125	40.7069	17.9053	7.25399
0.421667	5.53734	4.48095		0.421667	40.7073	17.5143	7.59117
0.422083	5.55354	4.46521		0.422083	40.7222	17.718	7.44508
0.4225	5.54983	4.48472		0.4225	40.8521	18.0156	7.49867
0.422917	5.55782	4.51913		0.422917	40.8569	17.6358	7.39204
0.423333	5.56841	4.51481		0.423333	40.8963	17.6264	7.56677
0.42375	5.55805	4.51214		0.42375	40.907	18.0178	7.90867
0.424167	5.5533	4.51054		0.424167	41.1277	17.6873	7.80984
0.424583	5.54895	4.49919		0.424583	41.2253	17.63	7.78611
0.425	5.54457	4.51702		0.425	41.2457	18.1167	7.76409
0.425417	5.53789	4.47829		0.425417	41.2171	17.9743	7.96113
0.425833	5.53444	4.45557		0.425833	41.2864	17.6121	7.64092
0.42625	5.56525	4.52595		0.42625	41.2722	17.9194	8.13888
0.426667	5.58639	4.52896		0.426667	41.2991	18.1824	7.7169
0.427083	5.5888	4.50218		0.427083	41.3551	17.7821	7.98209
0.4275	5.58361	4.47463		0.4275	41.3605	17.7952	11.0843
0.427917	5.56553	4.48303		0.427917	41.3352	18.2616	9.36034
0.428333	5.55771	4.52725		0.428333	41.5843	17.9146	8.58329
0.42875	5.556	4.50241		0.42875	41.571	17.7527	11.4464
0.429167	5.5648	4.48927		0.429167	41.7375	18.2226	11.3136
0.429583	5.5741	4.46371		0.429583	41.776	18.1422	11.5734
0.43	5.5644	4.44607		0.43	41.857	17.7793	8.84776
0.430417	5.55686	4.48329		0.430417	41.7062	18.1117	8.42749
0.430833	5.5498	4.44948		0.430833	41.689	18.2855	8.44945
0.43125	5.56013	4.49448		0.43125	41.8098	17.865	7.4575
0.431667	5.56721	4.46871		0.431667	41.8555	17.9766	8.09816
0.432083	5.56148	4.46261		0.432083	41.898	18.3989	19.2594
0.4325	5.56342	4.41902		0.4325	42.0586	18.0976	19.5284
0.432917	5.56875	4.45974		0.432917	42.0434	17.8852	19.0976
0.433333	5.56792	4.47019		0.433333	42.1705	18.3325	18.8464
0.43375	5.58055	4.4888		0.43375	42.2614	18.2131	17.7737
0.434167	5.60581	4.43005		0.434167	42.3952	17.9514	17.6981
0.434583	5.61933	4.45232		0.434583	42.4157	18.382	16.6766
0.435	5.59857	4.44049		0.435	42.5367	18.2925	15.7575
0.435417	5.60001	4.45007		0.435417	42.5327	17.9951	13.4366
0.435833	5.60001	4.41463		0.435833	42.4992	18.431	15.6077
0.43625	5.61337	4.42926		0.43625	42.6157	18.4148	15.3237
0.436667	5.6075	4.47811		0.436667	42.6725	18.1017	15.5031
0.437083	5.61661	4.45007		0.437083	42.6048	18.5231	14.2558
0.4375	5.60093	4.47201		0.4375	42.6675	18.3713	14.4352
0.437917	5.61079	4.44272		0.437917	42.6825	18.1242	14.3422
0.438333	5.6073	4.44861		0.438333	42.6926	18.5965	14.3355
0.43875	5.59953	4.47788		0.43875	42.8243	18.4064	14.5788
0.439167	5.57574	4.46289		0.439167	42.9578	18.1965	14.2924
0.439583	5.58921	4.42987		0.439583	42.8548	18.6137	14.3217
0.44	5.59746	4.47234		0.44	43.0115	18.4206	15.12
0.440417	5.59665	4.46824		0.440417	43.2089	18.1818	15.5086
0.440833	5.61426	4.44333		0.440833	43.1679	18.643	15.418
0.44125	5.62286	4.45572		0.44125	43.0833	18.677	15.2079
0.441667	5.61599	4.45832		0.441667	43.1995	18.2549	15.2943
0.442083	5.61991	4.44587		0.442083	43.3519	18.5431	15.178
0.4425	5.62927	4.45272		0.4425	43.2674	18.7547	14.9166
0.442917	5.63769	4.46099		0.442917	43.3629	18.3732	14.826
0.443333	5.63819	4.47679		0.443333	43.433	18.4485	15.2536
0.44375	5.62727	4.38997		0.44375	43.4671	18.8465	15.363
0.444167	5.62863	4.44588		0.444167	43.5093	18.5208	15.2999
0.444583	5.60949	4.42004		0.444583	43.5039	18.4108	15.3701
0.445	5.60861	4.40507		0.445	43.6973	18.8753	15.4892
0.445417	5.61372	4.44615		0.445417	43.6598	18.7587	15.2786
0.445833	5.61959	4.4575		0.445833	43.6484	18.4256	15.2866
0.44625	5.63328	4.44878		0.44625	43.7703	18.8674	15.1945
0.446667	5.63986	4.43048		0.446667	43.9029	18.9818	15.0641
0.447083	5.62411	4.41304		0.447083	43.8612	18.5585	14.8839
0.4475	5.61858	4.40125		0.4475	43.8748	18.7001	14.3899
0.447917	5.61315	4.40707		0.447917	43.9828	19.0021	14.3791
0.448333	5.63827	4.42383		0.448333	43.9265	18.6857	14.6815
0.44875	5.64105	4.43379		0.44875	43.9746	18.595	14.7736
0.449167	5.63683	4.44657		0.449167	44.0629	19.0632	15.3062
0.449583	5.62764	4.40697		0.449583	44.1817	18.8988	16.311
0.45	5.63548	4.42709		0.45	44.1438	18.5814	16.6239
0.450417	5.66584	4.41573		0.450417	44.2861	19.0092	16.5109
0.450833	5.66655	4.4269		0.450833	44.2867	19.0754	16.5271
0.45125	5.67064	4.44642		0.45125	44.2451	18.6665	17.1267
0.451667	5.65661	4.48397		0.451667	44.4421	18.8229	17.1894
0.452083	5.65071	4.45717		0.452083	44.5994	19.2032	16.9937
0.4525	5.66577	4.41392		0.4525	44.6783	18.8311	16.9602
0.452917	5.65897	4.42607		0.452917	44.6214	18.7355	16.8696
0.453333	5.66119	4.38983		0.453333	44.6768	19.2026	16.9302
0.45375	5.65845	4.37145		0.45375	44.7966	19.0043	16.4511
0.454167	5.6555	4.3991		0.454167	44.8548	18.7627	16.3655
0.454583	5.64964	4.40806		0.454583	44.8126	19.1917	16.0777
0.455	5.65425	4.35615		0.455	44.8366	19.0999	16.1718
0.455417	5.65501	4.38636		0.455417	44.8799	18.7538	15.974
0.455833	5.62919	4.38346		0.455833	45.0513	19.1516	15.9853
0.45625	5.6414	4.37002		0.45625	45.0518	19.2276	16.0038
0.456667	5.65966	4.38005		0.456667	45.0855	18.8787	15.8157
0.457083	5.67061	4.38016		0.457083	45.0995	19.2617	15.6721
0.4575	5.67871	4.40134		0.4575	45.1937	19.3049	15.4244
0.457917	5.67679	4.33775		0.457917	45.2513	18.9209	15.7977
0.458333	5.68766	4.36844		0.458333	45.2546	19.1597	15.9153
0.45875	5.6724	4.41727		0.45875	45.319	19.4378	15.5247
0.459167	5.65818	4.39522		0.459167	45.3803	19.0234	15.4788
0.459583	5.65534	4.3882		0.459583	45.4719	19.1674	15.8803
0.46	5.65853	4.3962		0.46	45.5271	19.5046	16.2217
0.460417	5.66504	4.35159		0.460417	45.653	19.1412	16.1835
0.460833	5.68877	4.42796		0.460833	45.7576	19.1322	16.2248
0.46125	5.68577	4.38796		0.46125	45.8063	19.4464	16.1367
0.461667	5.68738	4.33663		0.461667	45.8812	19.0705	16.2426
0.462083	5.65805	4.37256		0.462083	45.7877	19.2091	15.7985
0.4625	5.66491	4.33977		0.4625	45.8247	19.5832	15.8712
0.462917	5.67187	4.3853		0.462917	45.8918	19.2521	15.9077
0.463333	5.69568	4.39084		0.463333	45.8565	19.1133	15.9715
0.46375	5.69027	4.38109		0.46375	45.9469	19.585	15.9879
0.464167	5.68772	4.33594		0.464167	46.0852	19.455	15.9911
0.464583	5.68056	4.3565		0.464583	46.2526	19.1873	16.0204
0.465	5.67836	4.3535		0.465	46.15	19.645	16.0153
0.465417	5.68286	4.38447		0.465417	46.2423	19.5922	15.9417
0.465833	5.6842	4.42534		0.465833	46.3327	19.2268	16.0158
0.46625	5.67959	4.39693		0.46625	46.3445	19.633	16.0305
0.466667	5.69904	4.33289		0.466667	46.4496	19.7026	16.1273
0.467083	5.69435	4.30554		0.467083	46.4328	19.3169	15.9278
0.4675	5.68885	4.34982		0.4675	46.4404	19.5986	15.9603
0.467917	5.68947	4.36805		0.467917	46.6349	19.7438	15.7956
0.468333	5.67488	4.33184		0.468333	46.6008	19.3631	15.6084
0.46875	5.68231	4.38461		0.46875	46.6157	19.5785	15.6634
0.469167	5.69883	4.35109		0.469167	46.8655	19.8374	15.6431
0.469583	5.70136	4.31482		0.469583	46.9179	19.4988	15.6203
0.47	5.6903	4.31369		0.47	46.8786	19.6954	15.6695
0.470417	5.69633	4.30675		0.470417	46.9299	19.9119	15.6959
0.470833	5.68748	4.32304		0.470833	46.8591	19.5445	15.7376
0.47125	5.68382	4.36645		0.47125	46.9621	19.6755	15.932
0.471667	5.68868	4.33648		0.471667	47.128	19.8693	16.014
0.472083	5.68291	4.41132		0.472083	47.1364	19.5055	15.9091
0.4725	5.69674	4.33925		0.4725	47.2667	19.7837	15.8765
0.472917	5.70737	4.35264		0.472917	47.2684	19.8833	15.7544
0.473333	5.71184	4.3267		0.473333	47.3204	19.5702	15.8044
0.47375	5.69968	4.31934		0.47375	47.3329	19.9342	15.8648
0.474167	5.7095	4.33106		0.474167	47.3625	19.8568	15.8544
0.474583	5.70765	4.35103		0.474583	47.426	19.5869	15.8751
0.475	5.70056	4.30537		0.475	47.4533	19.994	15.8302
0.475417	5.7262	4.34293		0.475417	47.5675	20.0259	15.9113
0.475833	5.72208	4.37237		0.475833	47.6403	19.6671	15.9276
0.47625	5.72764	4.3344		0.47625	47.6596	19.9224	15.9438
0.476667	5.73886	4.35906		0.476667	47.6622	20.2265	15.8225
0.477083	5.74715	4.33577		0.477083	47.7286	19.8302	15.8409
0.4775	5.74133	4.34531		0.4775	47.8537	19.8884	15.9327
0.477917	5.72742	4.30881		0.477917	47.9149	20.2823	15.9358
0.478333	5.72052	4.31984		0.478333	48.0349	20.0305	15.9385
0.47875	5.73036	4.31337		0.47875	48.1016	19.8122	15.805
0.479167	5.72475	4.33931		0.479167	48.1454	20.2686	16.2955
0.479583	5.728	4.35981		0.479583	48.0795	20.0609	16.4331
0.48	5.71256	4.33139		0.48	48.1371	19.8505	16.3891
0.480417	5.69523	4.32855		0.480417	48.2194	20.2946	16.4018
0.480833	5.71599	4.35884		0.480833	48.2796	20.1121	16.4286
0.48125	5.73416	4.37465		0.48125	48.3753	19.879	16.4853
0.481667	5.73528	4.37663		0.481667	48.4022	20.3139	16.5164
0.482083	5.72941	4.35029		0.482083	48.5773	20.2209	16.4573
0.4825	5.73364	4.32153		0.4825	48.6275	20.0181	16.413
0.482917	5.74996	4.32955		0.482917	48.6219	20.4534	16.3554
0.483333	5.72877	4.31364		0.483333	48.7123	20.3046	16.4209
0.48375	5.72805	4.31445		0.48375	48.7532	19.9743	16.3239
0.484167	5.7572	4.35457		0.484167	48.8678	20.3543	16.3809
0.484583	5.75671	4.35396		0.484583	48.9582	20.38	16.5843
0.485	5.74472	4.34742		0.485	48.9743	20.0321	16.6006
0.485417	5.72916	4.29193		0.485417	48.9628	20.4144	16.5269
0.485833	5.71303	4.3133		0.485833	49.0404	20.4548	16.5575
0.48625	5.7361	4.33059		0.48625	49.1817	20.0822	16.4183
0.486667	5.76185	4.37232		0.486667	49.1108	20.472	16.3928
0.487083	5.76261	4.31632		0.487083	49.0882	20.5771	16.4871
0.4875	5.74256	4.28836		0.4875	49.2752	20.1827	16.5192
0.487917	5.73724	4.26758		0.487917	49.3341	20.4626	16.5623
0.488333	5.74718	4.29176		0.488333	49.3066	20.7038	16.4529
0.48875	5.74724	4.28998		0.48875	49.4279	20.282	16.8165
0.489167	5.75349	4.30554		0.489167	49.4753	20.5176	16.7832
0.489583	5.75217	4.30557		0.489583	49.5777	20.7959	16.6217
0.49	5.75173	4.29984		0.49	49.6765	20.3533	16.6215
0.490417	5.77838	4.31701		0.490417	49.7554	20.5685	16.804
0.490833	5.79939	4.31645		0.490833	49.7908	20.7998	16.5143
0.49125	5.77857	4.33268		0.49125	49.808	20.4409	16.4646
0.491667	5.76291	4.31316		0.491667	49.8431	20.4188	16.5423
0.492083	5.75201	4.3079		0.492083	49.9043	20.862	16.4605
0.4925	5.76291	4.30542		0.4925	49.9935	20.6895	16.5233
0.492917	5.76033	4.34974		0.492917	50.0483	20.3882	16.6646
0.493333	5.77147	4.3015		0.493333	50.2932	20.7976	16.5395
0.49375	5.77019	4.32213		0.49375	50.3072	20.7924	16.6477
0.494167	5.77988	4.31945		0.494167	50.385	20.4316	16.5844
0.494583	5.77534	4.25108		0.494583	50.3964	20.6935	16.508
0.495	5.76711	4.29113		0.495	50.3863	20.8895	16.5894
0.495417	5.78011	4.25116		0.495417	50.4993	20.4922	16.67
0.495833	5.77211	4.28951		0.495833	50.6686	20.6665	16.7342
0.49625	5.77078	4.26858		0.49625	50.7275	21.0146	16.6563
0.496667	5.79568	4.23398		0.496667	50.6824	20.745	16.6659
0.497083	5.79427	4.24625		0.497083	50.8094	20.6126	16.5223
0.4975	5.80925	4.30116		0.4975	50.9228	21.0818	16.6223
0.497917	5.81259	4.30351		0.497917	51.0499	20.8672	16.7412
0.498333	5.81099	4.32373		0.498333	51.1405	20.6395	16.7098
0.49875	5.81953	4.2954		0.49875	51.1622	21.0454	16.6593
0.499167	5.83061	4.27873		0.499167	51.2406	21.0489	16.6754
0.499583	5.8219	4.28352		0.499583	51.2588	20.687	16.5738
0.5	5.79468	4.32341		0.5	51.2587	20.8279	16.6643
0.500417	5.8046	4.3302		0.500417	51.2491	20.8389	16.9192
0.500833	5.79958	4.3023		0.500833	51.2872	20.6549	16.8754
0.50125	5.80591	4.27525		0.50125	51.4508	20.6829	16.9938
0.501667	5.80915	4.27134		0.501667	51.5377	21.1814	16.759
0.502083	5.80805	4.23948		0.502083	51.4896	20.9524	16.5401
0.5025	5.82115	4.24783		0.5025	51.6587	20.8589	16.4091
0.502917	5.82175	4.28058		0.502917	51.675	21.2479	15.6862
0.503333	5.81436	4.27226		0.503333	51.673	20.9412	15.2947
0.50375	5.81566	4.28376		0.50375	51.7203	20.9178	15.3512
0.504167	5.84124	4.28091		0.504167	51.8692	21.2683	15.3659
0.504583	5.84616	4.27886		0.504583	51.8617	21.2718	15.3949
0.505	5.82661	4.27116		0.505	51.9805	20.9607	15.3861
0.505417	5.81587	4.30042		0.505417	51.9527	21.4131	15.381
0.505833	5.80999	4.24687		0.505833	51.9955	21.3366	15.4133
0.50625	5.79814	4.24422		0.50625	52.0981	21.0096	15.2243
0.506667	5.79493	4.24002		0.506667	52.2447	21.4177	14.8656
0.507083	5.786	4.25342		0.507083	52.2271	21.3867	14.6042
0.5075	5.79102	4.27095		0.5075	52.2257	21.052	14.5208
0.507917	5.79904	4.2581		0.507917	52.3414	21.4954	14.7619
0.508333	5.81691	4.24558		0.508333	52.4804	21.4876	14.8081
0.50875	5.81401	4.24484		0.50875	52.5721	21.0816	14.8178
0.509167	5.8173	4.19074		0.509167	52.6493	21.38	14.8307
0.509583	5.82527	4.23748		0.509583	52.7231	21.5184	14.7928
0.51	5.8393	4.22886		0.51	52.852	21.1917	14.8223
0.510417	5.83451	4.20042		0.510417	52.8474	21.6091	14.9003
0.510833	5.8263	4.20972		0.510833	52.9717	21.505	14.953
0.51125	5.82472	4.2623		0.51125	52.9287	21.1855	14.9496
0.511667	5.8236	4.25835		0.511667	52.9996	21.5484	14.926
0.512083	5.80658	4.22365		0.512083	53.0933	21.621	14.9224
0.5125	5.808	4.23968		0.5125	53.0582	21.2289	14.8572
0.512917	5.81738	4.24362		0.512917	53.1046	21.4974	14.9519
0.513333	5.83327	4.24018		0.513333	53.2593	21.7341	14.9313
0.51375	5.8457	4.23852		0.51375	53.3499	21.3949	14.7872
0.514167	5.8371	4.24459		0.514167	53.3078	21.4657	15.0775
0.514583	5.82814	4.2016		0.514583	53.2886	21.8353	14.6925
0.515	5.8464	4.19165		0.515	53.4519	21.4523	14.8852
0.515417	5.85811	4.24799		0.515417	53.4884	21.4392	15.1159
0.515833	5.85816	4.27768		0.515833	53.6112	21.8916	15.1204
0.51625	5.8499	4.25484		0.51625	53.6194	21.6354	15.2025
0.516667	5.84846	4.22611		0.516667	53.7301	21.4478	15.8701
0.517083	5.8438	4.20354		0.517083	53.7575	21.8912	15.8086
0.5175	5.84394	4.17319		0.5175	53.8468	21.8477	15.7192
0.517917	5.84129	4.24573		0.517917	54.041	21.4739	15.7585
0.518333	5.8542	4.19345		0.518333	54.1758	21.7853	15.7391
0.51875	5.83419	4.17		0.51875	54.1643	22.1372	15.5727
0.519167	5.84212	4.22248		0.519167	54.275	21.8124	16.3641
0.519583	5.83296	4.21193		0.519583	54.4378	21.5773	17.2414
0.52	5.83358	4.18823		0.52	54.564	22.0354	17.6422
0.520417	5.81912	4.19421		0.520417	54.5754	22.0704	17.4804
0.520833	5.8182	4.22826		0.520833	54.6775	21.6698	17.0039
0.52125	5.82265	4.21833		0.52125	54.7726	21.9642	16.7409
0.521667	5.7988	4.21757		0.521667	54.791	22.144	16.6217
0.522083	5.81862	4.19777		0.522083	54.8019	21.7399	16.4445
0.5225	5.81692	4.24977		0.5225	54.8489	21.9286	16.4904
0.522917	5.82253	4.21812		0.522917	54.9137	22.2394	15.2053
0.523333	5.83668	4.21057		0.523333	55.0066	21.9172	15.1073
0.52375	5.85204	4.20973		0.52375	55.0375	21.866	15.59
0.524167	5.86327	4.23923		0.524167	55.2461	22.2874	15.7203
0.524583	5.88368	4.21832		0.524583	55.2881	22.0646	15.8562
0.525	5.87781	4.20081		0.525	55.2724	21.779	16.4462
0.525417	5.8656	4.19656		0.525417	55.2787	22.161	19.4269
0.525833	5.86124	4.17991		0.525833	55.4785	22.255	19.6528
0.52625	5.8633	4.15912		0.52625	55.539	21.8738	19.1991
0.526667	5.8593	4.15742		0.526667	55.5102	22.1162	19.2552
0.527083	5.86147	4.19112		0.527083	55.5649	22.2537	19.2384
0.5275	5.86368	4.18777		0.5275	55.6372	21.8921	18.7294
0.527917	5.8675	4.20584		0.527917	55.8787	22.0955	17.9874
0.528333	5.86299	4.20443		0.528333	55.8768	22.4804	17.842
0.52875	5.8533	4.18146		0.52875	55.7815	22.1814	17.8276
0.529167	5.85447	4.20476		0.529167	55.853	22.0253	17.7579
0.529583	5.84919	4.18099		0.529583	56.0052	22.4544	17.7211
0.53	5.85546	4.17212		0.53	56.2184	22.4457	17.592
0.530417	5.86902	4.18149		0.530417	56.2039	22.1153	17.6589
0.530833	5.86803	4.18779		0.530833	56.3195	22.5034	17.699
0.53125	5.87006	4.19246		0.53125	56.3113	22.5096	17.1119
0.531667	5.8692	4.16524		0.531667	56.3924	22.1331	16.8751
0.532083	5.87423	4.16441		0.532083	56.5343	22.461	17.4988
0.5325	5.8797	4.15383		0.5325	56.5488	22.6392	17.7898
0.532917	5.89132	4.14907		0.532917	56.4868	22.2262	17.6596
0.533333	5.88366	4.15663		0.533333	56.6108	22.3546	17.8725
0.53375	5.87251	4.15591		0.53375	56.6967	22.6706	18.0485
0.534167	5.86913	4.1585		0.534167	56.6837	22.3375	17.9921
0.534583	5.87077	4.12923		0.534583	56.6103	22.5295	18.0035
0.535	5.87453	4.10978		0.535	56.7327	22.7842	17.9558
0.535417	5.86275	4.17578		0.535417	56.9754	22.3867	17.8922
0.535833	5.84974	4.14407		0.535833	57.0182	22.5252	17.4994
0.53625	5.83072	4.17384		0.53625	56.9833	22.8721	17.6655
0.536667	5.84099	4.14004		0.536667	57.0677	22.4918	18.1185
0.537083	5.86133	4.16431		0.537083	57.2146	22.5793	18.1272
0.5375	5.89332	4.15158		0.5375	57.2868	22.8722	18.0506
0.537917	5.89853	4.18734		0.537917	57.3456	22.5987	18.1791
0.538333	5.88893	4.17182		0.538333	57.4798	22.4949	18.6503
0.53875	5.87656	4.14935		0.53875	57.4624	22.9448	18.4425
0.539167	5.87483	4.16669		0.539167	57.4806	22.8144	18.1444
0.539583	5.86958	4.12911		0.539583	57.5785	22.5372	17.9996
0.54	5.87704	4.18091		0.54	57.7116	22.963	17.9959
0.540417	5.87897	4.1943		0.540417	57.7569	22.84	18.0255
0.540833	5.89494	4.14811		0.540833	57.9152	22.5246	17.9639
0.54125	5.89795	4.13492		0.54125	57.883	22.9133	17.9194
0.541667	5.89568	4.1437		0.541667	57.9712	22.8532	17.8675
0.542083	5.89207	4.14048		0.542083	58.1019	22.6009	18.1648
0.5425	5.89597	4.14211		0.5425	58.1237	22.9774	12.4424
0.542917	5.8896	4.09909		0.542917	58.267	22.853	11.2417
0.543333	5.87414	4.11351		0.543333	58.3661	22.6755	11.3249
0.54375	5.88281	4.13204		0.54375	58.3887	23.11	11.8149
0.544167	5.89941	4.15166		0.544167	58.4964	22.9501	11.8106
0.544583	5.91171	4.16618		0.544583	58.4929	22.707	12.0004
0.545	5.90365	4.12574		0.545	58.5532	23.1893	12.0097
0.545417	5.91959	4.15622		0.545417	58.7218	23.0535	12.1533
0.545833	5.92752	4.13361		0.545833	58.736	22.7453	11.3541
0.54625	5.93907	4.14938		0.54625	58.76	23.1276	11.7004
0.546667	5.91774	4.16284		0.546667	58.85	23.1842	11.4383
0.547083	5.93176	4.13896		0.547083	58.8485	22.8188	10.3605
0.5475	5.93576	4.13022		0.5475	58.9856	23.1913	10.7629
0.547917	5.94838	4.12893		0.547917	59.0189	23.3322	9.8696
0.548333	5.91977	4.16892		0.548333	59.1813	22.937	11.0388
0.54875	5.91089	4.13279		0.54875	59.4308	23.2039	10.7024
0.549167	5.91774	4.15191		0.549167	59.3568	23.3855	11.5969
0.549583	5.93551	4.13907		0.549583	59.3402	23.0004	12.0096
0.55	5.91665	4.09631		0.55	59.4777	23.2399	11.3845
0.550417	5.91722	4.11761		0.550417	59.5225	23.4436	11.3274
0.550833	5.94445	4.1465		0.550833	59.6678	23.0913	11.2691
0.55125	5.95444	4.15105		0.55125	59.7072	23.2492	11.5042
0.551667	5.94683	4.17015		0.551667	59.8714	23.5445	11.769
0.552083	5.92408	4.1557		0.552083	60.0253	23.1278	11.3965
0.5525	5.9298	4.13799		0.5525	59.9978	23.2231	11.514
0.552917	5.93626	4.18233		0.552917	60.0257	23.553	11.3597
0.553333	5.95504	4.10958		0.553333	59.9773	23.2363	11.4863
0.55375	5.98237	4.07957		0.55375	60.1132	23.3971	11.7999
0.554167	5.98783	4.13017		0.554167	60.129	23.7014	11.9341
0.554583	5.97573	4.15615		0.554583	60.1701	23.3067	11.9084
0.555	5.9711	4.14733		0.555	60.3042	23.4166	12.0609
0.555417	5.983	4.14576		0.555417	60.4169	23.7429	11.8889
0.555833	5.98529	4.09447		0.555833	60.5576	23.3998	11.7582
0.55625	5.97997	4.11381		0.55625	60.568	23.3906	11.9803
0.556667	6.00671	4.15614		0.556667	60.658	23.7386	11.9043
0.557083	6.00429	4.16752		0.557083	60.7431	23.3819	11.5278
0.5575	6.00592	4.14966		0.5575	60.8842	23.4448	9.96109
0.557917	6.01105	4.15995		0.557917	60.8704	23.8611	10.0505
0.558333	6.02427	4.16856		0.558333	60.9033	23.5571	10.667
0.55875	6.01492	4.15222		0.55875	61.0241	23.4847	11.3296
0.559167	6.00239	4.16418		0.559167	61.1076	23.8845	11.2784
0.559583	5.9965	4.10058		0.559583	61.2636	23.6205	12.2048
0.56	6.00169	4.11812		0.56	61.2853	23.4767	11.9777
0.560417	6.00421	4.16051		0.560417	61.4271	23.9153	11.9622
0.560833	5.99221	4.15319		0.560833	61.4423	23.8896	11.998
0.56125	5.98822	4.09818		0.56125	61.4933	23.5407	11.8425
0.561667	6.0012	4.09598		0.561667	61.5063	23.8894	11.9688
0.562083	6.00664	4.10538		0.562083	61.665	23.8925	12.8868
0.5625	6.00742	4.14183		0.5625	61.8287	23.5519	11.707
0.562917	6.02008	4.18512		0.562917	61.7197	23.9281	11.9005
0.563333	6.02128	4.13851		0.563333	61.8751	23.9987	11.983
0.56375	6.01709	4.12649		0.56375	62.0014	23.634	12.7245
0.564167	6.02939	4.11468		0.564167	62.0037	23.9332	13.1833
0.564583	6.04686	4.14537		0.564583	62.15	24.1551	13.5003
0.565	6.04692	4.15266		0.565	62.1775	23.7744	13.7343
0.565417	6.04151	4.16551		0.565417	62.2093	24.0041	13.8757
0.565833	6.0218	4.13053		0.565833	62.3374	24.1618	13.7546
0.56625	6.02462	4.12936		0.56625	62.3786	23.807	14.0104
0.566667	6.02854	4.13854		0.566667	62.5632	24.0276	12.7739
0.567083	6.04039	4.11454		0.567083	62.6043	24.3416	12.2011
0.5675	6.04524	4.12117		0.5675	62.6406	23.9051	12.727
0.567917	6.05037	4.12129		0.567917	62.7863	23.9058	12.5531
0.568333	6.05543	4.10169		0.568333	63.0201	24.295	14.6032
0.56875	6.05388	4.14568		0.56875	62.9228	23.963	14.798
0.569167	6.05158	4.10905		0.569167	62.9371	24.0102	14.8261
0.569583	6.06337	4.10563		0.569583	63.0979	24.3845	14.498
0.57	6.05522	4.12055		0.57	63.1801	24.0978	2.60525
0.570417	6.04835	4.09737		0.570417	63.2187	24.1027	23.3289
0.570833	6.0638	4.10928		0.570833	63.2356	24.4984	22.7111
0.57125	6.06336	4.09325		0.57125	63.2592	24.2194	23.0013
0.571667	6.07691	4.10477		0.571667	63.3453	24.0313	22.8418
0.572083	6.07306	4.14455		0.572083	63.3607	24.4739	21.6577
0.5725	6.06913	4.12757		0.5725	63.575	24.4748	20.5983
0.572917	6.0628	4.1035		0.572917	63.6879	24.1175	21.4444
0.573333	6.07347	4.11828		0.573333	63.6784	24.4624	20.4908
0.57375	6.07732	4.09312		0.57375	63.7668	24.5203	19.7594
0.574167	6.0657	4.1158		0.574167	63.9105	24.1458	19.9015
0.574583	6.06508	4.10389		0.574583	63.9357	24.4283	19.9047
0.575	6.06841	4.11171		0.575	64.0276	24.6385	19.7863
0.575417	6.0804	4.12213		0.575417	64.0404	24.2625	19.8139
0.575833	6.0745	4.10795		0.575833	64.109	24.5482	19.7096
0.57625	6.06922	4.11825		0.57625	64.3152	24.6312	19.5693
0.576667	6.078	4.1155		0.576667	64.3937	24.2259	19.0749
0.577083	6.07885	4.08073		0.577083	64.4028	24.6307	18.9553
0.5775	6.08807	4.09629		0.5775	64.5603	24.7317	19.0825
0.577917	6.1052	4.0934		0.577917	64.6873	24.3823	18.7617
0.578333	6.12081	4.09133		0.578333	64.7702	24.6771	18.4536
0.57875	6.12008	4.09661		0.57875	64.9569	24.8746	18.4719
0.579167	6.11953	4.10019		0.579167	64.7801	24.487	18.4813
0.579583	6.11386	4.09036		0.579583	64.9077	24.729	18.5712
0.58	6.11528	4.07941		0.58	64.9058	24.8144	18.6679
0.580417	6.09821	4.08761		0.580417	65.0239	24.4712	18.7118
0.580833	6.09048	4.10193		0.580833	65.1042	24.7991	18.6143
0.58125	6.09662	4.12678		0.58125	65.248	24.93	18.5127
0.581667	6.09607	4.10917		0.581667	65.2476	24.6135	18.463
0.582083	6.10085	4.10567		0.582083	65.362	24.9418	17.8264
0.5825	6.10659	4.11866		0.5825	65.4326	24.9998	17.1346
0.582917	6.11794	4.0939		0.582917	65.5269	24.6373	16.3497
0.583333	6.12952	4.08703		0.583333	65.6306	24.8663	15.813
0.58375	6.12172	4.09641		0.58375	65.7283	25.1863	18.7156
0.584167	6.12802	4.07963		0.584167	65.7289	24.8373	19.5383
0.584583	6.12013	4.12087		0.584583	65.7896	24.7298	19.1893
0.585	6.11656	4.07103		0.585	65.8956	25.1184	19.2753
0.585417	6.12895	4.07281		0.585417	65.9785	24.923	19.0613
0.585833	6.13417	4.09008		0.585833	66.104	24.762	18.4407
0.58625	6.14382	4.08569		0.58625	66.2531	25.2318	18.929
0.586667	6.14927	4.11465		0.586667	66.4103	25.1296	18.5384
0.587083	6.14713	4.10453		0.587083	66.4436	24.8446	18.6819
0.5875	6.14858	4.11442		0.5875	66.4971	25.2331	17.9127
0.587917	6.14117	4.06267		0.587917	66.5199	25.1817	17.2244
0.588333	6.1449	4.05863		0.588333	66.6614	24.8739	16.7237
0.58875	6.14581	4.06484		0.58875	66.7257	25.2418	17.5859
0.589167	6.14454	4.10351		0.589167	66.8797	25.3131	17.6369
0.589583	6.15826	4.08161		0.589583	66.9263	24.9599	17.8174
0.59	6.15836	4.10632		0.59	66.9064	25.1603	17.7999
0.590417	6.16343	4.10779		0.590417	67.0063	25.3543	17.8322
0.590833	6.15069	4.10353		0.590833	67.0811	25.0148	17.795
0.59125	6.15436	4.11315		0.59125	67.3018	25.2574	17.6402
0.591667	6.15704	4.12721		0.591667	67.3409	25.5699	19.3218
0.592083	6.16166	4.10383		0.592083	67.4941	25.3004	19.2076
0.5925	6.16951	4.06569		0.5925	67.5193	25.1121	19.5935
0.592917	6.16969	4.06447		0.592917	67.54	25.5233	19.2386
0.593333	6.16758	4.07632		0.593333	67.6359	25.401	19.2106
0.59375	6.17629	4.11609		0.59375	67.7494	25.1068	19.2328
0.594167	6.17434	4.07706		0.594167	67.9179	25.454	19.2891
0.594583	6.16973	4.03813		0.594583	68.0237	25.603	19.3293
0.595	6.18356	4.07304		0.595	68.1171	25.2278	19.3097
0.595417	6.19344	4.09315		0.595417	68.2624	25.255	19.2381
0.595833	6.19012	4.0765		0.595833	68.3382	25.665	19.1638
0.59625	6.19279	4.09794		0.59625	68.4218	25.4736	19.1047
0.596667	6.19397	4.12817		0.596667	68.3663	25.2927	18.9349
0.597083	6.20508	4.13496		0.597083	68.4475	25.7758	18.8101
0.5975	6.19539	4.07559		0.5975	68.6249	25.7192	18.8677
0.597917	6.19401	4.1316		0.597917	68.6009	25.3681	18.8338
0.598333	6.19596	4.10784		0.598333	68.6824	25.7199	18.3923
0.59875	6.18907	4.11358		0.59875	68.8329	25.7189	18.2057
0.599167	6.20141	4.07393		0.599167	68.9677	25.4448	17.742
0.599583	6.20855	4.07689		0.599583	69.0914	25.8269	16.8463
0.6	6.21038	4.07421		0.6	69.0402	25.7693	17.2952
0.600417	6.21723	4.09058		0.600417	69.1276	25.49	17.3985
0.600833	6.22798	4.06675		0.600833	69.2516	25.8856	17.2918
0.60125	6.23241	4.0827		0.60125	69.3476	25.9648	17.0615
0.601667	6.23204	4.10828		0.601667	69.3906	25.6022	17.3038
0.602083	6.22889	4.05804		0.602083	69.4486	25.6775	17.1963
0.6025	6.22663	4.08603		0.6025	69.5947	26.0601	17.4315
0.602917	6.24016	4.12779		0.602917	69.7122	25.7921	17.3186
0.603333	6.24689	4.07511		0.603333	69.7029	25.6336	17.3393
0.60375	6.24718	4.07725		0.60375	69.7862	26.0595	16.4623
0.604167	6.24778	4.10428		0.604167	69.9277	26.0827	15.854
0.604583	6.24462	4.11784		0.604583	70.0214	25.7213	15.7473
0.605	6.24024	4.11655		0.605	70.1482	25.9776	17.272
0.605417	6.2452	4.08954		0.605417	70.2609	26.2159	17.4734
0.605833	6.25093	4.09634		0.605833	70.4064	25.84	17.6929
0.60625	6.25081	4.10052		0.60625	70.361	25.9809	17.8805
0.606667	6.2612	4.11176		0.606667	70.3823	26.3412	18.0302
0.607083	6.27037	4.12934		0.607083	70.4781	26.0197	17.926
0.6075	6.27844	4.11083		0.6075	70.567	25.9792	18.0023
0.607917	6.27915	4.13313		0.607917	70.6426	26.3619	18.0562
0.608333	6.27645	4.11653		0.608333	70.7288	26.101	18.2177
0.60875	6.28318	4.09353		0.60875	70.8672	25.9882	18.376
0.609167	6.29179	4.07628		0.609167	71.0066	26.4072	17.9926
0.609583	6.28443	4.0754		0.609583	71.0089	26.1599	18.1047
0.61	6.28226	4.08683		0.61	71.0589	25.9367	18.4963
0.610417	6.29418	4.11614		0.610417	71.1433	26.3112	18.7239
0.610833	6.30309	4.11205		0.610833	71.2292	26.4997	18.6653
0.61125	6.31593	4.13913		0.61125	71.3909	26.1248	18.7034
0.611667	6.31236	4.15852		0.611667	71.417	26.1362	18.8089
0.612083	6.32148	4.10015		0.612083	71.6164	26.5598	18.8837
0.6125	6.31858	4.05874		0.6125	71.6202	26.3296	19.0407
0.612917	6.3173	4.10315		0.612917	71.6855	26.182	19.1865
0.613333	6.31198	4.07709		0.613333	71.7518	26.6341	19.2929
0.61375	6.31845	4.10903		0.61375	71.7742	26.6273	19.2272
0.614167	6.31704	4.06734		0.614167	72.0251	26.2563	19.1142
0.614583	6.32096	4.09364		0.614583	72.021	26.5778	19.0333
0.615	6.32307	4.08856		0.615	72.0735	26.7397	19.0724
0.615417	6.32269	4.09739		0.615417	72.1706	26.3639	19.0285
0.615833	6.3319	4.08246		0.615833	72.3267	26.5174	18.8851
0.61625	6.325	4.08254		0.61625	72.2596	26.8679	19.0076
0.616667	6.32793	4.10278		0.616667	72.3977	26.5158	19.5902
0.617083	6.32306	4.07136		0.617083	72.3703	26.5431	19.5737
0.6175	6.32814	4.07719		0.6175	72.4818	26.9026	19.6556
0.617917	6.3252	4.07953		0.617917	72.6592	26.7064	19.5921
0.618333	6.34336	4.07317		0.618333	72.7069	26.577	19.5728
0.61875	6.34573	4.08402		0.61875	72.7976	27.0146	19.5296
0.619167	6.35218	4.11487		0.619167	72.9938	27.0528	19.6398
0.619583	6.36235	4.12886		0.619583	73.0496	26.6879	18.8561
0.62	6.37058	4.12735		0.62	73.1596	26.929	18.7596
0.620417	6.35663	4.13073		0.620417	73.241	27.169	18.4694
0.620833	6.33017	4.12741		0.620833	73.2705	26.7587	18.2144
0.62125	6.34326	4.12738		0.62125	73.2611	26.7277	17.7985
0.621667	6.35778	4.13007		0.621667	73.3709	27.1321	17.2107
0.622083	6.34822	4.10431		0.622083	73.537	26.8959	17.2484
0.6225	6.36036	4.07835		0.6225	73.5717	26.8024	17.0868
0.622917	6.36839	4.08184		0.622917	73.7495	27.2191	16.8532
0.623333	6.38165	4.13754		0.623333	73.8668	27.0711	16.0617
0.62375	6.37583	4.13092		0.62375	73.9372	26.7862	14.7236
0.624167	6.37765	4.09194		0.624167	73.9588	27.1243	15.5218
0.624583	6.37722	4.06826		0.624583	74.0109	27.3459	14.9093
0.625	6.38616	4.09395		0.625	73.99	26.9451	18.2021
0.625417	6.38166	4.13071		0.625417	74.1507	27.1473	18.713
0.625833	6.38159	4.11203		0.625833	74.2363	27.4526	18.5519
0.62625	6.38393	4.08667		0.62625	74.3246	27.1341	19.1489
0.626667	6.39467	4.07553		0.626667	74.433	27.0505	18.4769
0.627083	6.40342	4.11436		0.627083	74.6292	27.458	18.4268
0.6275	6.40161	4.07297		0.6275	74.746	27.285	18.4995
0.627917	6.40296	4.07627		0.627917	74.7836	27.0626	18.6322
0.628333	6.41061	4.0957		0.628333	74.8754	27.4687	18.6343
0.62875	6.40814	4.09037		0.62875	75.0875	27.3804	18.2853
0.629167	6.41177	4.10736		0.629167	75.1546	27.1565	17.962
0.629583	6.41068	4.08983		0.629583	75.2943	27.5529	18.3659
0.63	6.41858	4.11712		0.63	75.3328	27.4507	18.9488
0.630417	6.41461	4.10683		0.630417	75.3244	27.1595	18.6778
0.630833	6.42195	4.12163		0.630833	75.4486	27.5566	19.1514
0.63125	6.43077	4.06862		0.63125	75.5592	27.5089	19.4356
0.631667	6.41828	4.08338		0.631667	75.5982	27.2542	19.0912
0.632083	6.42177	4.0857		0.632083	75.6584	27.6775	18.9177
0.6325	6.43631	4.08105		0.6325	75.6548	27.6724	18.862
0.632917	6.42733	4.09805		0.632917	75.7288	27.3678	18.7198
0.633333	6.44366	4.10563		0.633333	75.9718	27.7156	18.8864
0.63375	6.44051	4.08198		0.63375	76.0999	27.7653	18.7394
0.634167	6.43209	4.11472		0.634167	76.2604	27.4238	18.8758
0.634583	6.43506	4.07889		0.634583	76.2827	27.67	18.8007
0.635	6.44346	4.11333		0.635	76.248	27.8793	18.9593
0.635417	6.45208	4.10878		0.635417	76.4183	27.5579	19.1532
0.635833	6.45271	4.08746		0.635833	76.4741	27.7043	19.43
0.63625	6.47193	4.09489		0.63625	76.5151	27.9784	19.2215
0.636667	6.47285	4.08835		0.636667	76.6792	27.644	18.5351
0.637083	6.47753	4.10078		0.637083	76.7056	27.8057	17.7108
0.6375	6.47695	4.09675		0.6375	76.915	28.0445	20.0833
0.637917	6.47647	4.0894		0.637917	77.0526	27.6637	20.0276
0.638333	6.47177	4.07043		0.638333	77.101	27.7335	19.814
0.63875	6.48231	4.08967		0.63875	77.2697	28.1161	19.846
0.639167	6.48634	4.11305		0.639167	77.3866	27.8222	19.7147
0.639583	6.48863	4.12493		0.639583	77.4071	27.6668	20.5358
0.64	6.49758	4.09888		0.64	77.495	28.1078	18.9169
0.640417	6.50221	4.09801		0.640417	77.4612	28.1485	20.1853
0.640833	6.50591	4.09273		0.640833	77.5581	27.7893	19.5843
0.64125	6.50257	4.1302		0.64125	77.6219	28.0329	18.5441
0.641667	6.49923	4.16122		0.641667	77.801	28.2398	19.8725
0.642083	6.49891	4.15622		0.642083	77.9467	27.889	20.0364
0.6425	6.50008	4.14239		0.6425	77.953	27.9798	19.9392
0.642917	6.51289	4.13903		0.642917	77.9671	28.3615	19.8571
0.643333	6.52044	4.11431		0.643333	78.0775	28.1453	19.7169
0.64375	6.52604	4.10419		0.64375	78.1602	28.0284	19.5754
0.644167	6.53184	4.10308		0.644167	78.2222	28.4265	19.3611
0.644583	6.52354	4.11327		0.644583	78.2002	28.3168	18.9369
0.645	6.53804	4.12457		0.645	78.3566	28.1029	18.5863
0.645417	6.54048	4.10169		0.645417	78.5084	28.52	18.8501
0.645833	6.54508	4.1108		0.645833	78.6195	28.5155	18.9363
0.64625	6.55116	4.08174		0.64625	78.6089	28.2044	18.8849
0.646667	6.55589	4.13182		0.646667	78.6368	28.5401	18.82
0.647083	6.56115	4.15526		0.647083	78.7142	28.6134	19.028
0.6475	6.55722	4.12934		0.6475	78.8366	28.2696	19.0983
0.647917	6.56318	4.10673		0.647917	79.0357	28.5932	19.1848
0.648333	6.56198	4.11919		0.648333	79.1104	28.5599	18.8295
0.64875	6.56602	4.10704		0.64875	79.159	28.2687	18.7305
0.649167	6.56203	4.10681		0.649167	79.3276	28.5862	18.6808
0.649583	6.57091	4.13861		0.649583	79.4239	28.7115	18.6416
0.65	6.57541	4.11597		0.65	79.4941	28.3872	18.3266
0.650417	6.57494	4.11034		0.650417	79.7452	28.724	18.7316
0.650833	6.5751	4.14618		0.650833	79.796	28.7651	18.5701
0.65125	6.59087	4.13541		0.65125	79.756	28.4818	19.0177
0.651667	6.59776	4.08578		0.651667	79.7646	28.8839	19.244
0.652083	6.58158	4.11511		0.652083	79.8389	28.8769	19.4638
0.6525	6.58152	4.10436		0.6525	79.9774	28.5713	19.541
0.652917	6.58657	4.12523		0.652917	80.0617	28.9736	19.7062
0.653333	6.60504	4.15431		0.653333	80.1236	28.9508	19.6755
0.65375	6.62222	4.15741		0.65375	80.2763	28.6546	19.8622
0.654167	6.62771	4.13381		0.654167	80.3581	29.0459	19.927
0.654583	6.62414	4.12328		0.654583	80.46	28.9728	19.8764
0.655	6.61523	4.13044		0.655	80.5979	28.6784	19.7788
0.655417	6.61347	4.12034		0.655417	80.5434	29.0538	19.8759
0.655833	6.61921	4.1295		0.655833	80.585	29.0666	19.8981
0.65625	6.61692	4.12264		0.65625	80.6283	28.7979	19.9585
0.656667	6.61457	4.13805		0.656667	80.6731	29.1985	19.8387
0.657083	6.62632	4.12679		0.657083	80.9434	29.232	19.972
0.6575	6.63717	4.12887		0.6575	81.0284	28.9204	20.1216
0.657917	6.64088	4.12385		0.657917	81.1117	29.3037	19.897
0.658333	6.63896	4.12162		0.658333	81.2245	29.2256	19.6729
0.65875	6.64196	4.12721		0.65875	81.2916	28.9823	20.5334
0.659167	6.64116	4.11393		0.659167	81.351	29.4248	21.5074
0.659583	6.65645	4.10952		0.659583	81.5248	29.3073	21.4371
0.66	6.65443	4.11058		0.66	81.6544	29.1073	20.9507
0.660417	6.656	4.15033		0.660417	81.6267	29.5227	20.9031
0.660833	6.66285	4.14932		0.660833	81.7558	29.361	19.5206
0.66125	6.67373	4.11864		0.66125	81.8721	29.1735	18.8959
0.661667	6.67587	4.16212		0.661667	81.9276	29.5547	20.16
0.662083	6.68018	4.12605		0.662083	82.04	29.6132	20.6661
0.6625	6.68441	4.14096		0.6625	82.207	29.2449	20.6325
0.662917	6.67876	4.11635		0.662917	82.2458	29.5564	19.0151
0.663333	6.67964	4.12042		0.663333	82.3431	29.7204	20.7227
0.66375	6.68069	4.14705		0.66375	82.3351	29.3756	19.8349
0.664167	6.67965	4.14949		0.664167	82.4282	29.6802	20.2642
0.664583	6.68176	4.11763		0.664583	82.5882	29.8118	20.6132
0.665	6.69798	4.08584		0.665	82.6011	29.483	20.9479
0.665417	6.69565	4.10546		0.665417	82.6046	29.5022	20.8179
0.665833	6.70415	4.09488		0.665833	82.6467	29.863	20.8748
0.66625	6.71368	4.1389		0.66625	82.7797	29.6433	21.1143
0.666667	6.70411	4.14645		0.666667	82.9292	29.4926	21.0864
0.667083	6.70846	4.13157		0.667083	82.9322	29.9516	21.2102
0.6675	6.71967	4.12571		0.6675	82.9691	29.8324	21.1205
0.667917	6.72951	4.12758		0.667917	83.1264	29.6353	21.1782
0.668333	6.72676	4.14404		0.668333	83.1797	30.0635	21.8336
0.66875	6.72625	4.14104		0.66875	83.4486	29.9523	21.4166
0.669167	6.7436	4.14389		0.669167	83.6862	29.7144	20.5399
0.669583	6.74942	4.16094		0.669583	83.7049	30.0884	20.6851
0.67	6.73911	4.14443		0.67	83.7091	30.1286	20.9414
0.670417	6.74823	4.15214		0.670417	83.696	29.7777	20.6951
0.670833	6.76521	4.13021		0.670833	83.7467	30.0865	20.625
0.67125	6.75493	4.13507		0.67125	83.8719	30.2007	20.3078
0.671667	6.75316	4.1309		0.671667	83.9339	29.8856	20.7424
0.672083	6.75375	4.14571		0.672083	84.1218	30.2144	21.017
0.6725	6.76492	4.15494		0.6725	84.2258	30.1997	20.9974
0.672917	6.76134	4.14904		0.672917	84.3267	29.9288	17.5346
0.673333	6.77118	4.15691		0.673333	84.2909	30.2995	13.3304
0.67375	6.76534	4.14072		0.67375	84.5404	30.3788	12.4854
0.674167	6.76364	4.13454		0.674167	84.5982	30.0634	13.9916
0.674583	6.76172	4.1282		0.674583	84.6779	30.4277	14.7499
0.675	6.77186	4.13325		0.675	84.8409	30.4515	14.5383
0.675417	6.7714	4.13366		0.675417	84.7922	30.1426	14.5648
0.675833	6.78289	4.13508		0.675833	84.7026	30.4975	14.9729
0.67625	6.80238	4.1687		0.67625	84.9027	30.5037	15.237
0.676667	6.80688	4.13022		0.676667	85.0843	30.2689	15.5462
0.677083	6.81364	4.14232		0.677083	85.0881	30.6468	15.6612
0.6775	6.80494	4.15814		0.6775	85.2005	30.5005	15.8308
0.677917	6.80061	4.17434		0.677917	85.2427	30.3957	15.8717
0.678333	6.80278	4.16022		0.678333	85.5192	30.8371	15.9954
0.67875	6.8113	4.12587		0.67875	85.548	30.9377	15.8676
0.679167	6.81848	4.14595		0.679167	85.726	30.7385	14.8538
0.679583	6.82008	4.14099		0.679583	85.828	31.0635	15.7832
0.68	6.82928	4.15111		0.68	85.9007	30.9545	2.47951
0.680417	6.82563	4.13788		0.680417	85.9933	30.7168	22.9304
0.680833	6.83108	4.16678		0.680833	85.9555	31.0652	25.4378
0.68125	6.82185	4.18566		0.68125	86.0678	30.8625	26.0767
0.681667	6.82981	4.1452		0.681667	86.2027	30.7583	23.15
0.682083	6.82596	4.1454		0.682083	86.2897	31.0856	33.2926
0.6825	6.83074	4.12692		0.6825	86.5602	30.8785	34.8374
0.682917	6.84467	4.17022		0.682917	86.613	30.7312	31.2454
0.683333	6.85941	4.17079		0.683333	86.5922	31.0511	18.0176
0.68375	6.85721	4.13815		0.68375	86.6892	30.9285	17.5023
0.684167	6.85677	4.15917		0.684167	86.7488	30.764	17.306
0.684583	6.85945	4.15627		0.684583	86.8232	31.1305	17.2167
0.685	6.86686	4.15354		0.685	86.9358	31.0171	17.3655
0.685417	6.88203	4.14538		0.685417	87.072	30.8311	17.8123
0.685833	6.88763	4.17026		0.685833	87.2212	31.1662	17.4841
0.68625	6.88298	4.17365		0.68625	87.2732	30.994	17.6769
0.686667	6.88606	4.16095		0.686667	87.3672	30.8839	17.9617
0.687083	6.9116	4.17219		0.687083	87.4498	31.1957	18.6976
0.6875	6.92947	4.15543		0.6875	87.4387	30.9317	17.8499
0.687917	6.91633	4.14851		0.687917	87.5668	31.0982	17.6012
0.688333	6.90858	4.18133		0.688333	87.5758	31.2258	16.8733
0.68875	6.90441	4.18941		0.68875	87.6517	30.9693	17.0971
0.689167	6.90754	4.19605		0.689167	87.7793	31.2705	17.2795
0.689583	6.8987	4.18962		0.689583	87.8339	31.4075	8.10854
0.69	6.90358	4.15966		0.69	87.8751	31.1265	22.2401
0.690417	6.92309	4.18681		0.690417	87.8085	31.3625	131.652
0.690833	6.92736	4.16908		0.690833	87.9709	31.4416	58.2864
0.69125	6.92676	4.15479		0.69125	88.219	31.1945	46.7861
0.691667	6.93148	4.18961		0.691667	88.3564	31.527	42.1963
0.692083	6.93027	4.2066		0.692083	88.4606	31.5635	39.6451
0.6925	6.92256	4.17912		0.6925	88.4918	31.3125	38.0339
0.692917	6.92569	4.17508		0.692917	88.6514	31.6154	36.8794
0.693333	6.93852	4.20579		0.693333	88.7182	31.4877	36.0709
0.69375	6.95202	4.2114		0.69375	88.828	31.3568	35.5865
0.694167	6.96493	4.21479		0.694167	88.9555	31.707	35.2715
0.694583	6.95652	4.18254		0.694583	89.0337	31.471	34.9952
0.695	6.956	4.19567		0.695	89.1182	31.5158	34.8403
0.695417	6.9617	4.18784		0.695417	89.2373	31.7243	34.7248
0.695833	6.97188	4.2029		0.695833	89.2537	31.4388	34.6656
0.69625	6.97725	4.17608		0.69625	89.2421	31.606	34.6253
0.696667	6.98404	4.17229		0.696667	89.394	31.694	34.6385
0.697083	6.99	4.20085		0.697083	89.3562	31.4483	34.5833
0.6975	6.99072	4.22214		0.6975	89.4364	31.7516	34.6068
0.697917	6.98669	4.19332		0.697917	89.6566	31.7724	34.6179
0.698333	6.99525	4.17334		0.698333	89.7248	31.5046	34.6761
0.69875	7.00764	4.18235		0.69875	89.9303	31.7867	34.7469
0.699167	7.02215	4.20781		0.699167	89.9636	31.8337	34.7996
0.699583	7.02162	4.19323		0.699583	90.0047	31.6041	34.8104
0.7	7.01903	4.20274		0.7	90.0351	31.9182	34.8585
0.700417	7.01641	4.21669		0.700417	90.1071	31.8166	34.9273
0.700833	7.01342	4.2065		0.700833	90.1699	31.7097	34.9693
0.70125	7.03188	4.18687		0.70125	90.3121	32.0182	35.0054
0.701667	7.03884	4.17687		0.701667	90.3568	31.8797	35.1216
0.702083	7.0473	4.19377		0.702083	90.3962	31.7929	35.1264
0.7025	7.04897	4.18708		0.7025	90.3691	32.0971	35.1837
0.702917	7.0525	4.18452		0.702917	90.5499	31.9385	35.2401
0.703333	7.04952	4.20816		0.703333	90.6025	31.8611	35.2961
0.70375	7.04521	4.17759		0.70375	90.6661	32.1641	35.3632
0.704167	7.05435	4.1688		0.704167	90.6505	31.9196	35.4471
0.704583	7.06635	4.17809		0.704583	90.8647	31.9839	35.5347
0.705	7.06355	4.20628		0.705	91.0113	32.2962	35.5992
0.705417	7.07134	4.20428		0.705417	91.0291	31.9957	35.6785
0.705833	7.07859	4.2345		0.705833	91.1209	32.042	35.728
0.70625	7.08075	4.2355		0.70625	91.1789	32.391	35.7739
0.706667	7.08877	4.20381		0.706667	91.2884	32.1365	35.7937
0.707083	7.08672	4.21261		0.707083	91.3884	32.1321	35.8389
0.7075	7.09124	4.21709		0.7075	91.488	32.4867	35.9243
0.707917	7.09984	4.22401		0.707917	91.593	32.3136	35.9653
0.708333	7.1076	4.24195		0.708333	91.7459	32.2355	36.003
0.70875	7.09816	4.23211		0.70875	91.7918	32.6126	36.0504
0.709167	7.11298	4.22122		0.709167	91.8981	32.4979	36.1047
0.709583	7.11478	4.21371		0.709583	92.0001	32.3026	36.1316
0.71	7.10776	4.20639		0.71	91.9535	32.6455	36.1409
0.710417	7.1188	4.185		0.710417	92.0854	32.6587	36.0299
0.710833	7.12333	4.20255		0.710833	92.1997	32.3844	36.0421
0.71125	7.12494	4.22148		0.71125	92.2769	32.6571	36.034
0.711667	7.1287	4.21219		0.711667	92.3148	32.8679	35.8895
0.712083	7.11937	4.19096		0.712083	92.3666	32.5467	35.961
0.7125	7.11931	4.22934		0.7125	92.422	32.743	35.3092
0.712917	7.12657	4.22746		0.712917	92.5135	32.9548	34.6038
0.713333	7.13554	4.26437		0.713333	92.6659	32.6411	104.242
0.71375	7.14146	4.24603		0.71375	92.8733	32.769	39.9199
0.714167	7.15099	4.23862		0.714167	92.8977	33.0728	37.0448
0.714583	7.16038	4.25967		0.714583	93.013	32.7832	36.748
0.715	7.16262	4.24511		0.715	92.9953	32.8116	36.8104
0.715417	7.16767	4.2127		0.715417	93.1098	33.0837	36.7484
0.715833	7.16755	4.21099		0.715833	93.1864	32.8058	36.6578
0.71625	7.18198	4.23375		0.71625	93.2583	32.9523	36.672
0.716667	7.19318	4.24949		0.716667	93.3587	33.2465	36.5379
0.717083	7.20045	4.27306		0.717083	93.5086	32.9599	36.3404
0.7175	7.19395	4.25078		0.7175	93.6157	33.03	34.5293
0.717917	7.18622	4.25371		0.717917	93.6783	33.3582	34.9228
0.718333	7.18782	4.266		0.718333	93.8247	33.1139	0.113022
0.71875	7.19137	4.27577		0.71875	93.9634	33.1878	0.1418
0.719167	7.2008	4.25786		0.719167	94.015	33.5626	11.3406
0.719583	7.2044	4.25982		0.719583	94.1062	33.3059	0.189783
0.72	7.2078	4.24545		0.72	94.1021	33.2734	18.0164
0.720417	7.21182	4.24107		0.720417	94.3209	33.5833	19.0914
0.720833	7.22042	4.251		0.720833	94.3235	33.4266	19.67
0.72125	7.22163	4.24222		0.72125	94.4705	33.3275	19.5652
0.721667	7.22348	4.26709		0.721667	94.5025	33.6185	18.5628
0.722083	7.22026	4.28475		0.722083	94.5578	33.5318	22.5184
0.7225	7.21265	4.27788		0.7225	94.6477	33.3502	22.8029
0.722917	7.21728	4.27252		0.722917	94.7274	33.6507	22.6013
0.723333	7.23053	4.2768		0.723333	94.8374	33.7269	22.2642
0.72375	7.23583	4.27723		0.72375	94.9806	33.464	24.2351
0.724167	7.24457	4.25174		0.724167	94.9845	33.6877	26.9103
0.724583	7.25199	4.26264		0.724583	95.0658	33.7772	26.6258
0.725	7.24656	4.26284		0.725	95.0757	33.553	25.2956
0.725417	7.25371	4.25697		0.725417	95.1479	33.7732	24.5016
0.725833	7.25368	4.28453		0.725833	95.2217	33.9201	25.8106
0.72625	7.26021	4.29033		0.72625	95.3359	33.6872	28.7174
0.726667	7.27182	4.30549		0.726667	95.391	33.9596	28.2016
0.727083	7.28155	4.29906		0.727083	95.4216	33.994	28.1748
0.7275	7.28666	4.28617		0.7275	95.5983	33.801	28.5749
0.727917	7.30059	4.29869		0.727917	95.57	34.0844	28.5543
0.728333	7.30128	4.27809		0.728333	95.7197	34.1044	28.3209
0.72875	7.3113	4.28251		0.72875	95.8178	33.9636	28.4122
0.729167	7.31487	4.27811		0.729167	95.8527	34.2934	28.0016
0.729583	7.31176	4.26387		0.729583	95.9586	34.0725	24.8145
0.73	7.31781	4.28397		0.73	95.907	34.0561	23.4106
0.730417	7.31972	4.29327		0.730417	95.9058	34.3932	21.3885
0.730833	7.3178	4.29864		0.730833	96.1478	34.226	25.2844
0.73125	7.32581	4.30791		0.73125	96.3312	34.2395	24.2919
0.731667	7.33389	4.32061		0.731667	96.3045	34.5548	27.6841
0.732083	7.34266	4.30158		0.732083	96.3981	34.3673	28.7044
0.7325	7.34846	4.31749		0.7325	96.4971	34.3908	28.456
0.732917	7.34676	4.3136		0.732917	96.5026	34.6747	28.6174
0.733333	7.348	4.30904		0.733333	96.5501	34.4335	28.7467
0.73375	7.34609	4.29393		0.73375	96.6603	34.5823	28.1168
0.734167	7.35219	4.28869		0.734167	96.8045	34.7637	28.5103
0.734583	7.35929	4.3115		0.734583	96.9631	34.5039	29.0293
0.735	7.36302	4.32201		0.735	96.9026	34.7236	29.0787
0.735417	7.37278	4.34527		0.735417	96.9236	34.8209	28.8478
0.735833	7.38378	4.32145		0.735833	96.9249	34.6333	29.1144
0.73625	7.38079	4.29784		0.73625	97.0432	34.9617	29.6605
0.736667	7.38465	4.30345		0.736667	97.1437	34.9197	29.3262
0.737083	7.38101	4.2975		0.737083	97.2226	34.742	29.1231
0.7375	7.38504	4.31678		0.7375	97.3335	35.0531	29.1832
0.737917	7.39277	4.29742		0.737917	97.4499	35.0494	29.4092
0.738333	7.40191	4.32201		0.738333	97.6101	34.8385	33.7297
0.73875	7.40844	4.32377		0.73875	97.7365	35.154	39.5461
0.739167	7.40549	4.34817		0.739167	97.6762	35.2369	41.7367
0.739583	7.40804	4.32284		0.739583	97.7321	34.9478	41.0186
0.74	7.42809	4.30318		0.74	97.8329	35.1826	29.593
0.740417	7.43677	4.31196		0.740417	97.8628	35.3289	25.3424
0.740833	7.43697	4.30777		0.740833	97.9463	35.096	26.3636
0.74125	7.44404	4.31761		0.74125	97.904	35.3441	27.4155
0.741667	7.44769	4.32813		0.741667	97.9929	35.4202	27.9704
0.742083	7.45014	4.32624		0.742083	98.0458	35.2336	27.5959
0.7425	7.44525	4.33132		0.7425	98.2086	35.5553	26.833
0.742917	7.44406	4.32838		0.742917	98.2233	35.4815	28.5458
0.743333	7.45338	4.34235		0.743333	98.3214	35.3539	30.0867
0.74375	7.44984	4.36208		0.74375	98.3022	35.7312	29.3321
0.744167	7.45639	4.34336		0.744167	98.4114	35.7031	29.3626
0.744583	7.47269	4.33882		0.744583	98.4841	35.4591	30.2427
0.745	7.4831	4.36576		0.745	98.6108	35.7723	31.1378
0.745417	7.47587	4.3562		0.745417	98.7937	35.7971	31.4384
0.745833	7.47971	4.35383		0.745833	98.845	35.5176	32.9371
0.74625	7.48115	4.36632		0.74625	98.7567	35.8167	35.4398
0.746667	7.49251	4.34316		0.746667	98.7066	35.9784	34.8366
0.747083	7.49269	4.35095		0.747083	98.8957	35.6884	36.6078
0.7475	7.49309	4.35443		0.7475	98.9507	35.8166	33.1441
0.747917	7.50038	4.3763		0.747917	99.001	36.0581	34.1019
0.748333	7.49892	4.34486		0.748333	99.1132	35.7818	34.3334
0.74875	7.50315	4.37394		0.74875	99.0727	35.7849	34.5768
0.749167	7.50443	4.37228		0.749167	99.1455	36.1447	34.2591
0.749583	7.52138	4.3877		0.749583	99.1915	35.978	36.0722
0.75	7.52052	4.38959		0.75	99.3588	35.9919	36.9884
0.750417	7.52016	4.34566		0.750417	99.4816	36.3359	36.779
0.750833	7.52101	4.38053		0.750833	99.5462	36.1124	35.5586
0.75125	7.52541	4.3585		0.75125	99.7203	36.153	36.3597
0.751667	7.52833	4.3613		0.751667	99.7936	36.4655	36.3466
0.752083	7.52824	4.37292		0.752083	99.9986	36.2868	36.0845
0.7525	7.53795	4.38659		0.7525	100.096	36.2481	35.7075
0.752917	7.54801	4.38866		0.752917	100.186	36.5866	35.2238
0.753333	7.55531	4.38159		0.753333	100.209	36.4445	35.3871
0.75375	7.56317	4.37883		0.75375	100.211	36.3441	35.1202
0.754167	7.57111	4.36603		0.754167	100.295	36.7013	34.9375
0.754583	7.57541	4.3606		0.754583	100.206	36.5524	35.2452
0.755	7.57446	4.37647		0.755	100.273	36.549	35.1466
0.755417	7.57713	4.3686		0.755417	100.369	36.8239	35.4865
0.755833	7.5854	4.36563		0.755833	100.492	36.6473	35.7898
0.75625	7.59036	4.40195		0.75625	100.583	36.6367	35.7698
0.756667	7.59584	4.3962		0.756667	100.646	36.9542	35.7923
0.757083	7.59725	4.39088		0.757083	100.592	36.7262	35.722
0.7575	7.60063	4.38294		0.7575	100.734	36.862	35.7624
0.757917	7.60809	4.38944		0.757917	100.912	36.9939	35.7418
0.758333	7.62136	4.38639		0.758333	101.03	36.7947	35.7291
0.75875	7.63049	4.39832		0.75875	101.027	37.149	35.9418
0.759167	7.63322	4.39532		0.759167	101.011	37.0709	35.8336
0.759583	7.64339	4.40744		0.759583	101.073	36.9203	34.7235
0.76	7.64492	4.40565		0.76	101.259	37.2723	34.4431
0.760417	7.65472	4.41927		0.760417	101.172	37.1281	35.6822
0.760833	7.6542	4.41114		0.760833	101.195	37.1277	36.2069
0.76125	7.65681	4.40847		0.76125	101.311	37.426	36.2738
0.761667	7.6627	4.39438		0.761667	101.357	37.218	35.8992
0.762083	7.66424	4.4153		0.762083	101.465	37.2251	35.8449
0.7625	7.66707	4.43357		0.7625	101.577	37.5416	36.1569
0.762917	7.67183	4.42297		0.762917	101.537	37.2935	36.3664
0.763333	7.68215	4.40859		0.763333	101.619	37.2941	36.254
0.76375	7.68496	4.42718		0.76375	101.557	37.6504	35.9703
0.764167	7.69145	4.43437		0.764167	101.759	37.3917	35.4535
0.764583	7.68786	4.44866		0.764583	101.724	37.3475	35.3303
0.765	7.69215	4.45576		0.765	101.854	37.7215	35.6807
0.765417	7.68353	4.43048		0.765417	102.079	37.6225	35.6521
0.765833	7.68557	4.4601		0.765833	102.102	37.4838	35.2361
0.76625	7.69543	4.44687		0.76625	102.191	37.8214	35.5629
0.766667	7.69541	4.43727		0.766667	102.272	37.6949	36.0414
0.767083	7.70145	4.43518		0.767083	102.196	37.7026	36.065
0.7675	7.70555	4.43383		0.7675	102.332	37.9145	36.3393
0.767917	7.70765	4.45893		0.767917	102.549	37.6497	36.5625
0.768333	7.72035	4.439		0.768333	102.529	37.8937	36.6277
0.76875	7.72614	4.46635		0.76875	102.505	38.0781	36.2621
0.769167	7.73801	4.45671		0.769167	102.673	37.8011	36.1599
0.769583	7.7395	4.46824		0.769583	102.791	37.9181	36.2168
0.77	7.73517	4.43445		0.77	102.834	38.1939	36.103
0.770417	7.74853	4.44049		0.770417	102.878	37.9372	35.9262
0.770833	7.75015	4.41936		0.770833	102.985	38.1046	35.5345
0.77125	7.75496	4.44135		0.77125	103.081	38.2349	35.3753
0.771667	7.75698	4.43992		0.771667	103.008	38.0016	35.163
0.772083	7.76599	4.44652		0.772083	103.124	38.3226	34.886
0.7725	7.7565	4.46431		0.7725	103.282	38.4482	34.0178
0.772917	7.76546	4.48673		0.772917	103.3	38.1667	33.349
0.773333	7.78094	4.46342		0.773333	103.284	38.4616	33.7268
0.77375	7.77754	4.44054		0.77375	103.368	38.4442	34.2778
0.774167	7.79489	4.47636		0.774167	103.46	38.2448	34.3561
0.774583	7.81256	4.4719		0.774583	103.439	38.5833	34.1811
0.775	7.80584	4.45827		0.775	103.439	38.6243	34.8949
0.775417	7.8045	4.47914		0.775417	103.492	38.3874	35.7457
0.775833	7.80421	4.47524		0.775833	103.69	38.7116	35.9748
0.77625	7.8152	4.47955		0.77625	103.715	38.7034	36.0364
0.776667	7.81667	4.46686		0.776667	103.871	38.5474	36.0375
0.777083	7.81408	4.48429		0.777083	103.933	38.9148	36.0297
0.7775	7.81456	4.48671		0.7775	104.047	38.7346	36.1481
0.777917	7.82745	4.48877		0.777917	104.088	38.7403	36.1833
0.778333	7.83627	4.50232		0.778333	104.191	39.0707	36.3196
0.77875	7.8395	4.49874		0.77875	104.23	38.8434	36.3173
0.779167	7.84112	4.47909		0.779167	104.171	38.8549	36.1887
0.779583	7.83797	4.45736		0.779583	104.19	39.2068	36.1688
0.78	7.85396	4.48631		0.78	104.249	39.09	36.3657
0.780417	7.86155	4.47772		0.780417	104.359	38.9972	36.467
0.780833	7.85863	4.48034		0.780833	104.416	39.3457	36.4814
0.78125	7.85968	4.46066		0.78125	104.582	39.1524	36.5626
0.781667	7.87463	4.48569		0.781667	104.558	39.0322	36.4423
0.782083	7.88038	4.5025		0.782083	104.662	39.3714	36.5993
0.7825	7.87969	4.49841		0.7825	104.671	39.3777	36.8024
0.782917	7.88096	4.4983		0.782917	104.75	39.2025	36.835
0.783333	7.88944	4.51874		0.783333	104.858	39.5285	36.8354
0.78375	7.89636	4.52455		0.78375	104.969	39.4518	37.0902
0.784167	7.89334	4.50071		0.784167	104.943	39.4113	37.1984
0.784583	7.89344	4.49373		0.784583	104.941	39.7351	37.2388
0.785	7.89438	4.50457		0.785	104.927	39.5736	37.2877
0.785417	7.90809	4.52948		0.785417	105.122	39.6112	37.3047
0.785833	7.91438	4.52394		0.785833	105.19	39.8833	37.2923
0.78625	7.92181	4.50257		0.78625	105.405	39.7322	37.2294
0.786667	7.92979	4.51522		0.786667	105.526	39.8229	37.1577
0.787083	7.93762	4.53127		0.787083	105.514	40.0586	37.1615
0.7875	7.93109	4.5394		0.7875	105.567	39.8659	37.14
0.787917	7.93399	4.52313		0.787917	105.635	39.8722	37.0514
0.788333	7.94472	4.53375		0.788333	105.587	40.2352	37.0426
0.78875	7.94737	4.50884		0.78875	105.66	40.0073	37.1363
0.789167	7.95463	4.51042		0.789167	105.707	40.0653	37.3193
0.789583	7.96939	4.52825		0.789583	105.729	40.3817	37.5797
0.79	7.97472	4.55077		0.79	105.808	40.2394	37.5616
0.790417	7.97135	4.55809		0.790417	105.751	40.187	37.6397
0.790833	7.97814	4.58905		0.790833	105.909	40.5183	37.6383
0.79125	7.97634	4.53564		0.79125	105.969	40.374	37.636
0.791667	7.98066	4.53485		0.791667	106.058	40.3374	37.7838
0.792083	7.99473	4.57331		0.792083	106.152	40.6808	38.2804
0.7925	7.99246	4.57051		0.7925	106.254	40.5022	38.316
0.792917	7.99352	4.5608		0.792917	106.178	40.56	38.3422
0.793333	7.99309	4.57719		0.793333	106.414	40.8269	38.3902
0.79375	7.99761	4.57019		0.79375	106.542	40.6165	38.2796
0.794167	7.99725	4.59192		0.794167	106.583	40.7561	38.325
0.794583	8.00919	4.57274		0.794583	106.618	41.067	37.9898
0.795	8.02251	4.59682		0.795	106.572	40.8247	37.9515
0.795417	8.01795	4.59637		0.795417	106.695	40.9213	38.0111
0.795833	8.02176	4.56265		0.795833	106.708	41.1338	38.0924
0.79625	8.02975	4.55735		0.79625	106.81	40.8646	38.1496
0.796667	8.03393	4.56243		0.796667	106.866	41.1153	38.2091
0.797083	8.0387	4.55576		0.797083	106.89	41.2556	38.3039
0.7975	8.04094	4.55987		0.7975	106.971	41.0243	38.2454
0.797917	8.04934	4.56663		0.797917	107.108	41.3443	38.015
0.798333	8.05159	4.59614		0.798333	107.19	41.3475	38.191
0.79875	8.06166	4.60476		0.79875	107.312	41.1436	38.2372
0.799167	8.06979	4.5793		0.799167	107.3	41.5048	38.2784
0.799583	8.08119	4.58419		0.799583	107.328	41.4451	38.2887
0.8	8.08723	4.59906		0.8	107.371	41.3297	38.3184
0.800417	8.09696	4.60487		0.800417	107.465	41.6704	38.3358
0.800833	8.09887	4.6133		0.800833	107.537	41.6773	38.4744
0.80125	8.10029	4.6053		0.80125	107.585	41.4862	38.5204
0.801667	8.10437	4.60049		0.801667	107.509	41.8143	38.5514
0.802083	8.11014	4.59496		0.802083	107.656	41.8708	38.5479
0.8025	8.10979	4.60468		0.8025	107.8	41.6307	38.5498
0.802917	8.1097	4.59681		0.802917	107.866	41.9566	38.6223
0.803333	8.11907	4.61189		0.803333	108.032	41.9461	38.7443
0.80375	8.13428	4.58962		0.80375	108.156	41.7827	38.7968
0.804167	8.13677	4.61654		0.804167	108.273	42.1319	38.9233
0.804583	8.1397	4.61029		0.804583	108.411	42.1188	38.8797
0.805	8.14293	4.61712		0.805	108.516	41.9986	38.8816
0.805417	8.15771	4.62462		0.805417	108.532	42.3544	38.8638
0.805833	8.17085	4.63379		0.805833	108.466	42.2655	38.793
0.80625	8.15768	4.61922		0.80625	108.522	42.1032	38.9407
0.806667	8.16289	4.62379		0.806667	108.642	42.4199	38.9273
0.807083	8.16435	4.6294		0.807083	108.742	42.5156	38.9814
0.8075	8.17321	4.62375		0.8075	108.776	42.32	39.0457
0.807917	8.18161	4.63056		0.807917	108.732	42.6222	39.1017
0.808333	8.18949	4.6451		0.808333	108.857	42.5904	39.1299
0.80875	8.18917	4.63617		0.80875	108.906	42.4361	39.2338
0.809167	8.18913	4.6379		0.809167	109.002	42.7801	39.2262
0.809583	8.19305	4.6274		0.809583	108.933	42.8004	39.2368
0.81	8.18458	4.66265		0.81	109.006	42.5739	39.3413
0.810417	8.19844	4.64348		0.810417	108.938	42.8597	39.4725
0.810833	8.20269	4.65852		0.810833	109.106	42.8918	39.528
0.81125	8.21836	4.65383		0.81125	109.19	42.6597	39.6663
0.811667	8.23011	4.6358		0.811667	109.242	42.9503	39.7261
0.812083	8.23871	4.62901		0.812083	109.268	43.0212	39.6765
0.8125	8.24222	4.6422		0.8125	109.336	42.8461	39.6927
0.812917	8.23617	4.65283		0.812917	109.361	43.1698	39.6717
0.813333	8.24468	4.65199		0.813333	109.512	43.2213	39.6213
0.81375	8.2521	4.66898		0.81375	109.415	43.0236	39.6857
0.814167	8.25121	4.69511		0.814167	109.396	43.338	39.4802
0.814583	8.25377	4.68813		0.814583	109.565	43.4294	39.5273
0.815	8.26025	4.67018		0.815	109.599	43.2019	39.3825
0.815417	8.25955	4.6617		0.815417	109.698	43.512	39.4621
0.815833	8.26569	4.67117		0.815833	109.753	43.6324	39.5453
0.81625	8.27886	4.66474		0.81625	109.756	43.3549	39.7875
0.816667	8.28233	4.68644		0.816667	109.788	43.6037	109.555
0.817083	8.28845	4.70515		0.817083	109.831	43.8547	67.1359
0.8175	8.29118	4.68763		0.8175	109.844	43.622	59.6219
0.817917	8.29759	4.66798		0.817917	109.848	43.7317	56.9631
0.818333	8.29862	4.70333		0.818333	109.835	44.0605	55.5626
0.81875	8.31632	4.71195		0.81875	109.925	43.8471	54.7072
0.819167	8.31336	4.69756		0.819167	109.985	43.8959	54.1514
0.819583	8.30132	4.71216		0.819583	110.113	44.2389	53.883
0.82	8.31206	4.71023		0.82	110.211	44.0868	53.6743
0.820417	8.32695	4.70258		0.820417	110.243	44.1098	53.5253
0.820833	8.33107	4.67833		0.820833	110.283	44.421	53.4167
0.82125	8.32964	4.71093		0.82125	110.425	44.1973	53.472
0.821667	8.33929	4.70447		0.821667	110.433	44.2628	53.4604
0.822083	8.34533	4.72941		0.822083	110.447	44.6052	53.4633
0.8225	8.35096	4.73163		0.8225	110.53	44.4205	53.5035
0.822917	8.35433	4.70994		0.822917	110.631	44.4325	53.4999
0.823333	8.35291	4.72583		0.823333	110.782	44.7588	53.5655
0.82375	8.36207	4.73633		0.82375	110.758	44.5632	53.6151
0.824167	8.37201	4.72016		0.824167	110.924	44.6127	53.6642
0.824583	8.37524	4.7119		0.824583	111.002	44.9225	53.7301
0.825	8.37212	4.69767		0.825	110.988	44.7357	53.8865
0.825417	8.38116	4.72334		0.825417	111.034	44.8654	53.9028
0.825833	8.39096	4.72401		0.825833	111.16	45.1537	53.9416
0.82625	8.40079	4.77542		0.82625	111.118	44.8974	54.0435
0.826667	8.40361	4.74623		0.826667	111.119	45.0198	54.1597
0.827083	8.40392	4.73844		0.827083	111.222	45.3272	54.226
0.8275	8.40829	4.73838		0.8275	111.323	45.0872	54.321
0.827917	8.41718	4.75955		0.827917	111.421	45.1936	54.375
0.828333	8.41877	4.73345		0.828333	111.507	45.5349	54.4734
0.82875	8.42523	4.7388		0.82875	111.621	45.4189	54.5516
0.829167	8.43249	4.73133		0.829167	111.812	45.3631	54.6415
0.829583	8.42985	4.74106		0.829583	111.874	45.6958	54.6683
0.83	8.43954	4.7199		0.83	111.887	45.5684	54.7306
0.830417	8.44619	4.76178		0.830417	111.93	45.5769	54.8055
0.830833	8.45187	4.7726		0.830833	112.036	45.8866	54.908
0.83125	8.46393	4.75575		0.83125	112.045	45.687	55.0062
0.831667	8.46134	4.76026		0.831667	111.917	45.7415	55.1003
0.832083	8.4708	4.78682		0.832083	112.078	46.0917	55.1515
[truncated: 5,253 more rows]

## Sheet: Panel B
time/s days	narG KO	narG KO	narG KO		time/s days	wild type	wild type
0	<J>/µA/cm²	<J>/µA/cm²	<J>/µA/cm²		0	<J>/µA/cm²	<J>/µA/cm²
0.000416667	175.576	211.004	89.84		0.000416667	137.476	149.775
0.000833333	80.4089	90.8375	71.5695		0.000833333	74.1318	75.4857
0.00125	64.6614	60.2209	56.1943		0.00125	58.8213	60.2917
0.00166667	58.938	53.5238	47.3081		0.00166667	54.5637	55.3698
0.00208333	55.758	49.7929	38.0435		0.00208333	51.5298	52.1102
0.0025	54.7611	48.714	34.8202		0.0025	49.1327	51.9135
0.00291667	53.114	46.8288	28.402		0.00291667	48.178	49.4009
0.00333333	53.0766	46.8132	25.4364		0.00333333	46.9943	48.806
0.00375	51.8482	46.8834	23.7647		0.00375	46.5506	47.7732
0.00416667	49.8117	46.3858	21.2454		0.00416667	45.4219	47.8288
0.00458333	50.599	44.8604	20.2449		0.00458333	44.8737	46.1976
0.005	48.9105	45.2207	19.7516		0.005	44.435	46.3056
0.00541667	46.8759	44.5777	18.7885		0.00541667	43.0931	44.6135
0.00583333	46.6247	43.8425	20.106		0.00583333	42.1576	44.2818
0.00625	45.7668	43.8634	19.154		0.00625	41.5194	43.3285
0.00666667	46.8037	43.3153	17.3113		0.00666667	41.5006	44.0219
0.00708333	45.8573	44.1498	17.0453		0.00708333	41.2787	43.1252
0.0075	44.6083	42.5138	17.4651		0.0075	39.6862	42.6202
0.00791667	44.2927	41.3741	18.082		0.00791667	39.3991	41.8244
0.00833333	43.1216	40.8222	17.6497		0.00833333	40.095	41.5405
0.00875	42.922	40.63	17.6616		0.00875	39.0567	41.542
0.00916667	42.8704	40.3519	17.8902		0.00916667	38.5366	41.6949
0.00958333	42.76	41.7937	17.6734		0.00958333	38.4	40.5815
0.01	41.7793	40.652	17.2927		0.01	38.489	40.7345
0.0104167	41.436	39.9137	18.1936		0.0104167	37.819	41.0493
0.0108333	41.1466	39.5317	17.9241		0.0108333	36.9965	39.0267
0.01125	40.7951	38.4291	16.7475		0.01125	36.9607	39.0661
0.0116667	40.1938	38.1143	15.8214		0.0116667	36.645	39.1681
0.0120833	39.096	37.9931	13.899		0.0120833	36.8053	39.0261
0.0125	39.2861	39.5705	12.8469		0.0125	36.2651	37.3647
0.0129167	38.222	37.7421	14.3922		0.0129167	35.869	36.8674
0.0133333	37.5727	38.0067	15.6241		0.0133333	35.332	36.5066
0.01375	38.4811	38.5614	16.9195		0.01375	34.7217	36.586
0.0141667	38.275	36.2877	18.0049		0.0141667	34.6092	36.8615
0.0145833	37.2373	37.6694	18.393		0.0145833	34.5547	36.2675
0.015	38.0588	36.9067	18.3357		0.015	34.7912	35.7888
0.0154167	36.4464	37.0769	17.889		0.0154167	34.6727	35.1495
0.0158333	36.3265	36.1461	17.4345		0.0158333	33.5843	34.8661
0.01625	36.352	37.4997	17.0899		0.01625	33.4591	34.8795
0.0166667	35.657	35.4851	16.5464		0.0166667	33.2616	34.3637
0.0170833	35.3908	35.3898	16.0587		0.0170833	33.4432	34.6377
0.0175	35.8074	34.7158	15.3992		0.0175	32.9705	34.8135
0.0179167	35.023	35.4725	14.6341		0.0179167	33.2386	34.0283
0.0183333	34.2235	34.4897	14.0474		0.0183333	32.4066	33.7686
0.01875	34.6294	34.1855	13.4532		0.01875	32.6618	33.7207
0.0191667	34.1069	33.9694	13.4371		0.0191667	31.909	33.182
0.0195833	33.3483	33.4193	13.7423		0.0195833	32.4428	32.812
0.02	33.7595	33.5516	13.8745		0.02	31.9334	32.7912
0.0204167	33.6624	34.852	14.0951		0.0204167	31.7678	32.6117
0.0208333	33.6714	34.2911	14.5438		0.0208333	30.6121	32.2251
0.02125	32.3473	33.4099	14.27		0.02125	30.6488	32.6044
0.0216667	31.731	33.0002	14.0077		0.0216667	31.2036	31.6837
0.0220833	31.7606	32.9796	13.7363		0.0220833	30.3868	32.5232
0.0225	31.8149	33.7731	13.709		0.0225	30.8743	32.0531
0.0229167	32.0423	31.8603	13.2067		0.0229167	30.212	30.2935
0.0233333	33.0896	32.3597	13.3609		0.0233333	30.1091	31.958
0.02375	34.8084	32.3364	13.719		0.02375	29.9642	31.0815
0.0241667	30.9651	31.5645	13.7741		0.0241667	30.2295	30.7207
0.0245833	29.837	30.7386	14.997		0.0245833	29.7424	29.9978
0.025	29.8138	31.5608	15.0682		0.025	29.7855	29.6478
0.0254167	30.1307	33.8483	14.9729		0.0254167	29.5091	30.499
0.0258333	29.3883	32.1367	14.6556		0.0258333	28.9277	29.6686
0.02625	29.3592	31.0623	14.6528		0.02625	29.0305	30.0765
0.0266667	28.9549	31.0964	14.453		0.0266667	28.6268	28.9851
0.0270833	28.7698	31.3374	14.3248		0.0270833	28.8971	29.075
0.0275	29.1824	30.3269	14.5079		0.0275	28.6029	29.4543
0.0279167	28.9666	30.2135	14.7307		0.0279167	28.6306	29.3772
0.0283333	28.2957	30.03	15.607		0.0283333	28.0982	28.9497
0.02875	28.5259	29.8315	15.8468		0.02875	28.3723	29.1513
0.0291667	28.5371	29.4757	16.022		0.0291667	27.7711	28.7039
0.0295833	28.8882	30.2229	15.7275		0.0295833	27.7954	28.2902
0.03	27.8209	30.215	15.45		0.03	27.4165	28.3573
0.0304167	27.5875	30.0829	15.2962		0.0304167	27.3922	28.0123
0.0308333	27.282	29.6427	15.2074		0.0308333	27.2384	27.9385
0.03125	28.7827	29.3633	15.1427		0.03125	27.1375	27.2539
0.0316667	27.8764	29.0644	14.9894		0.0316667	27.2836	27.3718
0.0320833	26.8788	30.7845	14.927		0.0320833	26.207	27.1145
0.0325	26.1896	29.0782	14.8071		0.0325	26.7582	27.0879
0.0329167	26.419	29.2416	14.4674		0.0329167	26.4631	27.1168
0.0333333	26.4917	29.2087	14.1833		0.0333333	26.5803	26.7554
0.03375	25.9261	29.7187	14.212		0.03375	26.1043	26.6917
0.0341667	25.8364	28.7172	14.1531		0.0341667	26.2242	26.5679
0.0345833	26.2256	31.5008	14.0787		0.0345833	26.0546	26.8886
0.035	25.7006	29.0853	13.9452		0.035	25.7234	26.6791
0.0354167	25.4017	28.452	13.6771		0.0354167	25.5043	26.5926
0.0358333	25.7972	28.5142	13.5971		0.0358333	25.2172	25.9029
0.03625	25.4551	27.8171	43.7748		0.03625	25.1104	25.655
0.0366667	25.1244	27.6368	24.3437		0.0366667	24.9107	25.9698
0.0370833	24.8717	26.8677	19.4581		0.0370833	24.7551	25.8912
0.0375	24.3889	27.7011	17.4663		0.0375	25.0124	25.1908
0.0379167	25.4086	32.2288	16.1603		0.0379167	42.9649	25.5994
0.0383333	23.2836	31.293	14.8818		0.0383333	40.6177	29.4784
0.03875	23.0916	31.9857	14.9316		0.03875	40.4007	28.1654
0.0391667	22.6879	31.7221	14.4353		0.0391667	33.6541	26.3112
0.0395833	22.795	31.1956	14.0532		0.0395833	32.875	26.0717
0.04	22.5387	31.5235	13.8458		0.04	33.0425	27.0348
0.0404167	22.736	31.2786	13.5746		0.0404167	32.5231	26.724
0.0408333	22.774	30.9238	13.2729		0.0408333	32.2779	26.5756
0.04125	22.7451	30.8968	13.0345		0.04125	32.5052	26.3834
0.0416667	22.503	30.798	12.6638		0.0416667	32.1323	26.1323
0.0420833	22.3678	30.7449	12.859		0.0420833	31.9749	26.381
0.0425	22.7186	30.5846	12.8155		0.0425	31.8705	25.8225
0.0429167	22.0006	30.6158	12.4472		0.0429167	31.0679	26.1402
0.0433333	21.8749	30.478	12.264		0.0433333	31.1169	26.8931
0.04375	21.9908	30.5769	12.2933		0.04375	31.0005	26.3081
0.0441667	21.8099	30.099	11.8459		0.0441667	30.6197	26.5941
0.0445833	22.0392	29.6303	11.8705		0.0445833	30.4431	25.5939
0.045	21.9005	29.7469	11.9467		0.045	30.6657	25.8163
0.0454167	22.0174	30.2986	11.8324		0.0454167	30.2627	25.26
0.0458333	21.6369	29.6918	11.8704		0.0458333	29.8087	24.6122
0.04625	21.6439	29.3584	11.7604		0.04625	30.428	24.3981
0.0466667	21.5433	29.8663	11.5321		0.0466667	29.4989	24.7361
0.0470833	21.5299	29.356	11.7574		0.0470833	29.2871	25.5186
0.0475	21.7483	29.3706	11.5937		0.0475	29.5537	25.0631
0.0479167	21.6063	29.1559	11.6587		0.0479167	28.8808	24.1276
0.0483333	21.5915	28.6679	11.5343		0.0483333	28.8422	23.626
0.04875	21.5229	28.7142	11.2111		0.04875	28.9253	24.3184
0.0491667	21.6193	28.7053	11.1123		0.0491667	28.4556	24.3005
0.0495833	21.4971	28.5639	10.8954		0.0495833	28.455	24.5685
0.05	21.2875	28.6532	10.9175		0.05	28.718	23.4349
0.0504167	21.1166	28.1879	11.0281		0.0504167	28.1129	22.4985
0.0508333	21.0208	27.9987	11.1541		0.0508333	28.1476	23.0869
0.05125	20.8239	28.0941	10.8168		0.05125	27.9675	23.636
0.0516667	20.7194	28.1955	11.0228		0.0516667	27.641	22.1929
0.0520833	20.7473	27.9866	10.9357		0.0520833	27.6762	22.4212
0.0525	20.5976	27.9325	11.4251		0.0525	27.4151	23.744
0.0529167	20.7778	28.0323	11.2383		0.0529167	27.2032	23.1488
0.0533333	20.6151	27.5333	11.207		0.0533333	27.3509	23.9628
0.05375	20.5811	27.3931	11.0736		0.05375	26.9116	23.4994
0.0541667	20.1876	27.2192	10.8879		0.0541667	26.6672	23.337
0.0545833	20.7919	27.2272	10.756		0.0545833	26.7987	23.2208
0.055	20.5183	27.049	10.9875		0.055	26.3691	22.436
0.0554167	20.3062	27.3288	11.0744		0.0554167	26.3181	22.9029
0.0558333	20.1974	27.1112	11.0858		0.0558333	26.4014	22.7748
0.05625	20.1188	26.6577	11.1477		0.05625	26.0166	22.2256
0.0566667	20.2117	27.0244	10.9907		0.0566667	25.7537	21.0727
0.0570833	20.0638	26.8534	11.0897		0.0570833	25.8586	21.9129
0.0575	20.3542	26.6567	10.916		0.0575	25.5138	22.0487
0.0579167	19.9483	27.0953	10.6588		0.0579167	25.748	21.7959
0.0583333	20.0727	26.6289	10.4847		0.0583333	25.4967	21.4347
0.05875	19.9596	26.6965	10.1722		0.05875	25.0157	21.9632
0.0591667	19.4476	26.685	10.2427		0.0591667	25.2355	21.1439
0.0595833	19.729	26.2465	10.2849		0.0595833	25.0721	21.381
0.06	20.2063	25.9051	10.3068		0.06	24.7684	21.4548
0.0604167	19.9017	26.4071	10.3334		0.0604167	24.8844	22.0137
0.0608333	19.6345	26.2198	10.4091		0.0608333	24.6896	21.6378
0.06125	19.6091	26.2791	10.4085		0.06125	24.4228	21.3112
0.0616667	19.5255	25.9435	10.6096		0.0616667	24.5289	21.3977
0.0620833	19.9442	25.9133	10.8612		0.0620833	23.9998	20.964
0.0625	19.9448	25.8931	10.7201		0.0625	24.1643	21.154
0.0629167	19.4877	25.5154	10.4441		0.0629167	24.0826	20.8324
0.0633333	19.7146	25.9069	10.6301		0.0633333	23.7892	20.6243
0.06375	19.8802	25.6574	10.5815		0.06375	23.8063	21.5822
0.0641667	19.9015	25.5474	10.5608		0.0641667	23.7754	21.7635
0.0645833	19.8687	25.3154	10.7534		0.0645833	23.4305	20.6541
0.065	19.8529	25.1658	10.5827		0.065	23.6459	20.2488
0.0654167	19.6572	25.2173	10.6893		0.0654167	23.642	21.3347
0.0658333	19.888	25.013	10.5832		0.0658333	23.0312	21.0074
0.06625	19.7486	24.9609	10.7511		0.06625	23.2043	20.6784
0.0666667	19.3597	24.9989	10.7699		0.0666667	23.3044	19.7706
0.0670833	19.2352	24.6361	10.8533		0.0670833	22.7488	19.6797
0.0675	19.0512	24.6282	10.3265		0.0675	22.8705	19.8287
0.0679167	19.3212	24.8904	10.3052		0.0679167	22.846	20.41
0.0683333	18.6591	24.4165	10.2195		0.0683333	22.5013	21.3794
0.06875	18.9613	24.5345	10.1078		0.06875	22.7176	20.6155
0.0691667	18.9513	24.4979	10.5581		0.0691667	22.4405	19.512
0.0695833	18.6798	24.4231	10.3377		0.0695833	22.2116	19.9377
0.07	19.04	24.582	10.3154		0.07	22.3271	19.619
0.0704167	18.7169	24.2656	10.604		0.0704167	21.9846	19.3706
0.0708333	18.5933	24.6052	10.8219		0.0708333	21.9343	19.1759
0.07125	19.1929	24.271	10.9386		0.07125	21.9372	19.8358
0.0716667	19.087	24.1966	10.4858		0.0716667	21.7425	19.679
0.0720833	18.6325	24.2479	10.3237		0.0720833	21.5655	19.6272
0.0725	19.0189	24.1161	10.2015		0.0725	22.0099	19.9667
0.0729167	18.752	24.0954	10.3551		0.0729167	21.6104	19.5357
0.0733333	18.7436	23.9947	10.1902		0.0733333	21.4407	19.0649
0.07375	18.4404	23.9092	10.163		0.07375	21.4112	19.8712
0.0741667	18.195	23.8457	10.2369		0.0741667	21.1532	20.0918
0.0745833	18.5273	23.7639	10.1721		0.0745833	21.3343	19.7783
0.075	18.3018	24.0674	10.2241		0.075	21.1666	20.1505
0.0754167	18.5221	23.9575	9.98436		0.0754167	20.8251	19.7215
0.0758333	18.4643	23.9027	10.1939		0.0758333	21.1295	19.9673
0.07625	18.5333	23.76	10.0324		0.07625	20.9495	19.5212
0.0766667	18.1506	23.6995	9.76095		0.0766667	20.7603	18.9732
0.0770833	18.1783	23.6371	9.854		0.0770833	20.8826	18.8719
0.0775	18.1231	23.5203	9.67144		0.0775	20.7658	19.8595
0.0779167	18.8458	23.5515	9.38322		0.0779167	20.5379	18.9533
0.0783333	18.6452	23.8358	9.54883		0.0783333	20.5677	19.0419
0.07875	18.4906	23.5218	9.50596		0.07875	20.5068	19.1989
0.0791667	18.3231	23.3628	9.34406		0.0791667	20.4312	19.1734
0.0795833	18.4229	23.1484	8.81515		0.0795833	20.5534	18.5087
0.08	18.5049	23.5708	8.9533		0.08	20.3128	19.2015
0.0804167	18.619	23.3661	8.92502		0.0804167	20.1339	18.9216
0.0808333	18.1419	23.246	8.95798		0.0808333	20.317	19.455
0.08125	18.6148	23.3946	8.78602		0.08125	20.0175	19.0757
0.0816667	18.3917	23.3845	8.69203		0.0816667	20.2437	18.6893
0.0820833	18.5741	23.3789	9.26151		0.0820833	20.0314	18.5212
0.0825	18.0027	23.3691	9.33369		0.0825	19.9025	19.1744
0.0829167	18.3748	23.158	9.28645		0.0829167	19.8945	19.5571
0.0833333	18.4965	23.0353	9.2812		0.0833333	19.9305	18.8992
0.08375	18.7286	23.0531	9.3929		0.08375	19.6852	19.1384
0.0841667	18.4407	23.1441	9.32923		0.0841667	20.0672	19.6934
0.0845833	18.103	23.0323	9.1924		0.0845833	19.7382	18.9488
0.085	17.8043	23.1343	9.16686		0.085	19.4907	19.0226
0.0854167	18.1117	22.8109	9.37671		0.0854167	19.5602	19.9139
0.0858333	18.7876	23.1262	9.38763		0.0858333	19.5863	19.9518
0.08625	18.1682	22.8736	9.03612		0.08625	19.4392	18.7214
0.0866667	18.051	22.7979	8.84963		0.0866667	19.4733	18.8034
0.0870833	18.2029	22.9556	8.86709		0.0870833	19.4399	18.5915
0.0875	18.2246	22.8837	8.76697		0.0875	19.3515	18.5459
0.0879167	18.2275	23.0362	8.82459		0.0879167	19.5013	18.9933
0.0883333	18.9213	23.0398	8.85612		0.0883333	19.2	19.137
0.08875	18.4963	22.7996	8.85599		0.08875	19.3732	19.1759
0.0891667	18.1946	22.8848	8.88915		0.0891667	19.3525	19.5696
0.0895833	18.447	22.8593	9.10711		0.0895833	19.0233	19.3577
0.09	18.4921	22.8667	9.21011		0.09	19.2257	18.6036
0.0904167	18.4642	22.8601	8.9749		0.0904167	19.3346	18.8719
0.0908333	18.2895	23.2643	9.00798		0.0908333	19.0511	18.8132
0.09125	18.3272	22.9532	9.10841		0.09125	19.1231	18.5896
0.0916667	18.1363	22.8873	8.98798		0.0916667	19.0835	18.8987
0.0920833	18.4025	22.4306	8.86436		0.0920833	18.8248	18.7714
0.0925	18.4401	22.7669	8.86069		0.0925	18.8401	18.8702
0.0929167	18.1409	22.8837	8.71271		0.0929167	18.9721	18.9818
0.0933333	18.136	22.729	8.64275		0.0933333	18.7896	18.7133
0.09375	18.2369	22.7128	8.69245		0.09375	18.6617	18.8923
0.0941667	17.9222	22.8222	8.70614		0.0941667	18.7772	18.9455
0.0945833	18.2186	23.0049	8.69153		0.0945833	18.7354	19.0958
0.095	17.8789	22.684	8.56794		0.095	18.4626	18.2716
0.0954167	18.2196	22.8531	8.60541		0.0954167	18.6712	18.8833
0.0958333	18.5872	22.6718	8.60465		0.0958333	18.5706	18.1186
0.09625	18.1613	22.6894	8.63475		0.09625	18.3663	17.9766
0.0966667	18.1851	22.677	8.52839		0.0966667	18.6387	18.831
0.0970833	18.0057	22.6326	8.7246		0.0970833	18.3873	18.3046
0.0975	18.0666	22.7075	8.84239		0.0975	18.3711	18.9569
0.0979167	18.1338	22.4209	8.67746		0.0979167	18.4532	18.8297
0.0983333	18.3352	22.5044	8.70014		0.0983333	18.3849	18.4893
0.09875	18.5051	22.7555	8.78092		0.09875	18.3291	17.7757
0.0991667	18.478	22.2695	8.90165		0.0991667	18.4982	17.9679
0.0995833	18.3597	22.7294	9.02723		0.0995833	18.3337	18.4967
0.1	18.199	22.6427	9.34634		0.1	18.148	18.1457
0.100417	18.1545	22.4517	9.50847		0.100417	18.3443	18.811
0.100833	18.2074	22.537	9.3857		0.100833	18.0265	19.053
0.10125	18.2946	22.3882	9.22017		0.10125	17.9922	18.8438
0.101667	18.06	22.2845	9.19424		0.101667	18.185	18.9474
0.102083	18.1026	22.3178	8.90604		0.102083	17.9259	18.619
0.1025	17.9598	22.5279	8.8639		0.1025	18.0816	19.0103
0.102917	18.1617	22.4266	9.08565		0.102917	18.1916	19.3656
0.103333	18.2565	22.4288	9.05586		0.103333	17.9278	18.9989
0.10375	18.2317	22.3788	9.103		0.10375	17.9704	18.1096
0.104167	18.2404	22.4855	9.11751		0.104167	18.0606	17.9743
0.104583	18.2836	22.5681	8.99724		0.104583	17.8783	18.639
0.105	18.3433	22.7506	9.05006		0.105	17.8257	18.7038
0.105417	18.0064	22.4657	8.89114		0.105417	18.0077	18.5688
0.105833	18.1618	22.6101	9.02159		0.105833	17.7693	18.6465
0.10625	18.5031	22.3789	9.11361		0.10625	17.7414	18.9186
0.106667	18.5135	22.0955	8.81747		0.106667	17.8808	18.762
0.107083	18.5592	22.4057	8.75895		0.107083	17.7489	18.8191
0.1075	18.6543	22.3452	9.48514		0.1075	17.6561	18.5263
0.107917	18.8243	22.215	10.1978		0.107917	17.942	18.6736
0.108333	18.1403	22.3436	10.3131		0.108333	17.7368	18.6112
0.10875	18.2221	22.6046	10.0538		0.10875	17.7052	18.7195
0.109167	18.2576	22.3679	9.9309		0.109167	17.7461	18.7377
0.109583	18.4352	22.3649	9.92711		0.109583	17.6174	18.9044
0.11	18.0633	22.3245	9.86635		0.11	17.5864	19.1953
0.110417	18.2918	22.5704	9.95911		0.110417	17.7365	18.8678
0.110833	18.528	22.5176	10.258		0.110833	17.5029	18.4217
0.11125	18.4349	22.1587	10.1007		0.11125	17.5373	18.1478
0.111667	18.3761	22.0869	9.98288		0.111667	17.7208	18.2182
0.112083	17.9833	22.1614	10.0651		0.112083	17.5187	18.5517
0.1125	18.376	22.301	9.8677		0.1125	17.4867	18.1299
0.112917	18.658	22.1636	9.95941		0.112917	17.5966	18.6049
0.113333	18.4651	22.1966	9.90009		0.113333	17.5299	18.6323
0.11375	18.3211	22.4652	9.97859		0.11375	17.4918	18.7223
0.114167	18.1794	22.4682	9.97141		0.114167	17.5253	19.0286
0.114583	18.6617	22.3722	9.96256		0.114583	17.4182	18.5142
0.115	18.5367	22.5319	10.0779		0.115	17.497	18.837
0.115417	18.2777	22.4758	9.9694		0.115417	17.5373	18.5784
0.115833	18.3279	22.3994	9.92372		0.115833	17.3607	18.8217
0.11625	18.4	22.268	10.1492		0.11625	17.371	18.3047
0.116667	18.5349	22.2441	10.1666		0.116667	17.411	18.9199
0.117083	18.617	22.3625	10.4057		0.117083	17.2643	19.4606
0.1175	18.3726	22.4331	10.3449		0.1175	17.4816	19.8046
0.117917	18.3958	22.3251	10.1893		0.117917	17.435	19.2162
0.118333	18.3705	22.0667	10.166		0.118333	17.2525	18.8078
0.11875	18.2835	22.3622	10.1746		0.11875	17.3921	19.05
0.119167	18.3767	22.163	10.1535		0.119167	17.2696	18.7027
0.119583	18.0637	22.1879	10.1375		0.119583	17.3072	18.8499
0.12	18.1905	22.4047	9.90595		0.12	17.4227	19.1561
0.120417	18.184	22.4408	9.94855		0.120417	17.1803	19.0094
0.120833	18.3914	22.3684	9.98005		0.120833	17.2493	19.13
0.12125	18.8852	22.2923	9.98502		0.12125	17.3285	19.2459
0.121667	19.0684	22.1702	10.1103		0.121667	17.1	19.7389
0.122083	19.2556	21.881	10.3478		0.122083	17.1703	18.9063
0.1225	19.2464	22.1915	10.3229		0.1225	17.234	18.9026
0.122917	18.5348	22.3948	10.4044		0.122917	17.0021	19.0465
0.123333	18.3739	22.2036	10.4238		0.123333	17.271	19.0993
0.12375	18.3281	22.1701	10.663		0.12375	17.3028	19.3909
0.124167	18.7601	22.1981	10.6842		0.124167	17.0423	18.7869
0.124583	18.4906	22.1118	10.7942		0.124583	17.0959	18.7678
0.125	18.3992	21.9881	10.8321		0.125	17.1457	18.8378
0.125417	18.5507	22.4442	11.0181		0.125417	16.9842	18.9903
0.125833	18.6756	22.4288	10.8756		0.125833	17.2438	18.9169
0.12625	18.7739	22.3637	10.8374		0.12625	17.2614	19.3713
0.126667	18.549	22.1526	10.79		0.126667	17.1441	19.2428
0.127083	18.6662	22.176	10.8331		0.127083	17.2322	19.6061
0.1275	18.4499	22.2249	10.7496		0.1275	17.1979	19.0303
0.127917	18.245	22.1963	10.6667		0.127917	16.9905	19.3759
0.128333	18.39	22.1945	10.6505		0.128333	17.1332	19.1819
0.12875	18.6581	22.1052	10.8268		0.12875	17.0907	18.7981
0.129167	18.4411	22.3636	10.6801		0.129167	16.9063	19.3119
0.129583	18.5939	22.3218	10.8213		0.129583	17.0415	19.1541
0.13	18.3024	21.9403	10.8872		0.13	17.1521	19.0277
0.130417	18.4947	22.1501	10.9118		0.130417	16.9943	19.1183
0.130833	18.5076	22.2574	10.7196		0.130833	17.0118	19.5685
0.13125	18.5376	22.2559	10.6304		0.13125	17.1439	19.3572
0.131667	18.2442	22.0511	10.8396		0.131667	16.9486	19.4852
0.132083	18.858	21.9918	11.0686		0.132083	16.9752	19.3115
0.1325	18.3672	22.1921	11.0539		0.1325	17.0973	19.253
0.132917	18.8488	21.9796	10.8549		0.132917	16.9062	19.0113
0.133333	18.7057	21.8983	11.0013		0.133333	17.0291	19.4983
0.13375	18.8153	22.189	10.8755		0.13375	17.0073	19.6088
0.134167	18.4777	22.052	10.8273		0.134167	16.8637	19.1758
0.134583	18.6342	21.9883	10.7097		0.134583	17.015	19.2801
0.135	18.5376	22.0603	10.8046		0.135	16.9565	19.1466
0.135417	18.5342	22.0283	11.0779		0.135417	16.8534	19.7139
0.135833	18.2778	22.1476	11.0094		0.135833	16.9372	19.7475
0.13625	18.1745	22.0774	10.9353		0.13625	16.9689	19.5948
0.136667	18.3962	22.1678	11.0946		0.136667	16.8237	19.3224
0.137083	18.5267	22.2801	11.1724		0.137083	17.0404	19.0762
0.1375	19.0705	21.92	11.1747		0.1375	16.9336	18.8983
0.137917	18.5973	22.0443	11.1994		0.137917	17.0162	19.0362
0.138333	18.9172	22.2168	11.2126		0.138333	17.0658	19.4028
0.13875	18.9216	22.1591	11.0673		0.13875	16.9267	19.387
0.139167	18.4674	22.265	11.0758		0.139167	17.088	19.1314
0.139583	18.4577	22.0558	11.6373		0.139583	16.9936	19.4608
0.14	18.8275	22.0468	11.5284		0.14	16.9749	20.1271
0.140417	18.852	22.0515	11.3577		0.140417	17.0886	19.5454
0.140833	18.6312	22.0103	11.3793		0.140833	16.9354	19.4362
0.14125	18.8095	22.1902	11.5385		0.14125	16.8677	19.5793
0.141667	18.7963	22.1055	11.265		0.141667	17.1635	19.0317
0.142083	18.8148	22.0576	11.3122		0.142083	16.9958	19.626
0.1425	18.6464	22.1455	11.2931		0.1425	16.9886	19.1478
0.142917	18.7859	21.9382	11.3942		0.142917	17.0744	19.2584
0.143333	19.208	22.0829	11.2969		0.143333	16.9818	19.1062
0.14375	18.7554	22.0824	11.2678		0.14375	17.1434	19.1855
0.144167	18.7912	21.891	11.2263		0.144167	16.9889	19.1822
0.144583	18.8287	22.259	11.5319		0.144583	16.8585	19.4426
0.145	19.0408	22.2984	11.3523		0.145	16.9965	19.4738
0.145417	18.9902	22.1326	11.4133		0.145417	17.0293	19.7175
0.145833	18.6354	22.0919	11.4171		0.145833	17.0715	19.6557
0.14625	18.742	22.1765	11.2564		0.14625	17.1139	19.8136
0.146667	18.7329	22.3535	11.4471		0.146667	17.0309	19.6288
0.147083	19.1503	22.2892	11.2534		0.147083	17.0003	19.4419
0.1475	19.3001	22.1251	11.1159		0.1475	17.1901	19.754
0.147917	19.1779	22.1705	11.0808		0.147917	17.007	19.5594
0.148333	19.2063	22.1037	11.1639		0.148333	16.8794	19.4742
0.14875	19.2647	22.0782	11.295		0.14875	16.9852	19.1283
0.149167	18.8931	22.0697	11.1395		0.149167	17.0123	19.3454
0.149583	18.6173	21.772	11.1247		0.149583	16.916	19.3877
0.15	18.7003	22.0719	11.1031		0.15	17.1408	19.1223
0.150417	18.6036	21.7661	11.0432		0.150417	17.019	19.065
0.150833	18.5914	22.0774	11.0457		0.150833	16.9868	19.5104
0.15125	18.7459	21.8773	11.0668		0.15125	17.1522	19.4694
0.151667	18.9346	21.7815	10.9859		0.151667	16.9544	19.1497
0.152083	18.8177	21.9813	11.1347		0.152083	16.964	19.3659
0.1525	19.1191	22.1492	11.0576		0.1525	17.0866	19.761
0.152917	19.2027	22.2418	11.3066		0.152917	16.8683	19.4647
0.153333	18.8955	22.1073	11.4445		0.153333	16.871	19.6934
0.15375	18.9535	22.1521	11.2852		0.15375	17.1771	19.5005
0.154167	19.2456	21.8544	11.2193		0.154167	16.8092	19.4103
0.154583	19.0921	22.2403	11.2861		0.154583	16.9725	20.5055
0.155	18.8264	22.178	11.3397		0.155	16.9952	19.4034
0.155417	18.9456	22.0833	11.5127		0.155417	16.8322	19.6978
0.155833	18.7794	21.97	11.3253		0.155833	16.896	19.7864
0.15625	18.8241	22.22	11.3331		0.15625	16.9696	20.0618
0.156667	18.7376	22.3209	11.4101		0.156667	16.9221	20.0063
0.157083	18.6541	22.0019	11.3845		0.157083	17.0042	19.9518
0.1575	18.7956	22.1165	11.5872		0.1575	16.9673	19.6227
0.157917	19.248	22.0766	11.3624		0.157917	16.8752	19.6946
0.158333	19.0094	22.0899	11.4331		0.158333	16.9056	19.6238
0.15875	18.6432	22.2026	11.4815		0.15875	17.0314	19.42
0.159167	18.7259	22.0309	11.6734		0.159167	16.7751	19.8405
0.159583	18.9023	22.1103	11.6313		0.159583	16.9957	19.8301
0.16	18.997	22.0793	11.762		0.16	17.0786	19.6923
0.160417	19.0651	22.0966	11.8585		0.160417	16.9231	19.5058
0.160833	18.9718	21.856	11.704		0.160833	17.0527	19.4534
0.16125	19.1646	22.0185	11.75		0.16125	17.1183	19.7374
0.161667	19.3309	22.1568	11.6984		0.161667	16.8851	20.0631
0.162083	19.2055	22.0922	11.7048		0.162083	17.123	19.4111
0.1625	18.9732	22.3288	11.677		0.1625	16.9758	19.5016
0.162917	18.9665	21.9577	11.7106		0.162917	16.9775	19.373
0.163333	19.2135	21.7111	11.7673		0.163333	17.0507	19.6448
0.16375	19.2262	21.9366	11.7764		0.16375	16.9004	19.8167
0.164167	19.1924	22.0459	11.9319		0.164167	16.9465	19.6976
0.164583	18.9882	22.0743	11.8431		0.164583	17.0643	19.8788
0.165	18.963	21.8949	11.8724		0.165	16.9225	20.2507
0.165417	18.8559	21.9409	11.8248		0.165417	16.9848	19.8647
0.165833	18.7639	22.1095	11.6503		0.165833	17.1407	19.8722
0.16625	18.74	22.1984	11.756		0.16625	16.9143	20.1393
0.166667	18.5692	22.1517	12.1298		0.166667	16.9332	19.6763
0.167083	19.0304	22.0665	11.8771		0.167083	17.1538	20.4728
0.1675	18.7857	22.0472	11.8644		0.1675	16.9613	19.9397
0.167917	18.7369	22.0534	11.6746		0.167917	17.0027	19.8176
0.168333	19.1325	22.1039	11.7263		0.168333	17.1187	19.7713
0.16875	19.5812	21.9867	11.7198		0.16875	16.9297	19.9462
0.169167	19.0851	21.9394	11.7075		0.169167	17.0444	19.6738
0.169583	18.9904	22.0683	11.7144		0.169583	17.0665	19.7159
0.17	18.8932	22.1948	11.64		0.17	16.9258	19.732
0.170417	19.2129	22.0936	11.8624		0.170417	17.1652	20.0386
0.170833	19.1671	22.3516	11.8815		0.170833	17.0476	19.8525
0.17125	19.4443	22.0883	11.8794		0.17125	16.9762	20.2226
0.171667	19.2914	22.1667	11.8764		0.171667	17.1178	20.3389
0.172083	19.0813	22.0851	12.06		0.172083	17.0634	19.8781
0.1725	19.0791	22.1399	11.9562		0.1725	16.9911	20.0491
0.172917	18.9934	21.9856	11.8833		0.172917	17.1132	19.9656
0.173333	19.1326	22.1431	11.9785		0.173333	17.0726	19.9403
0.17375	19.1766	22.2579	12.0174		0.17375	16.9695	20.5352
0.174167	19.1836	22.1816	12.2489		0.174167	17.0644	20.3698
0.174583	19.1846	22.1031	12.0431		0.174583	17.0378	20.274
0.175	19.0578	22.1026	12.0554		0.175	17.0823	20.0918
0.175417	19.1264	22.2579	12.1064		0.175417	17.013	20.063
0.175833	19.2961	22.1435	12.1785		0.175833	16.9977	20.4423
0.17625	19.0895	22.2528	11.9903		0.17625	17.0749	20.3861
0.176667	19.152	22.2714	12.1109		0.176667	17.1827	20.3689
0.177083	19.3754	22.2787	12.1733		0.177083	17.0183	20.4942
0.1775	19.1725	22.205	12.3764		0.1775	17.1822	20.0556
0.177917	19.2259	22.2578	12.1732		0.177917	17.1996	20.6477
0.178333	19.4162	22.1338	12.1839		0.178333	17.0296	20.6959
0.17875	19.3944	22.1963	12.1925		0.17875	17.0654	20.2683
0.179167	19.4608	21.9669	12.199		0.179167	17.1815	20.1904
0.179583	19.3257	21.9916	12.036		0.179583	16.9281	20.336
0.18	19.1481	22.3036	12.0259		0.18	17.121	20.3997
0.180417	19.1982	22.284	12.067		0.180417	17.1645	20.5665
0.180833	19.2096	22.1957	12.092		0.180833	16.9709	20.3659
0.18125	19.2577	22.235	12.1725		0.18125	17.2684	19.9693
0.181667	19.6417	22.3628	12.1998		0.181667	17.0426	20.0106
0.182083	19.6134	22.2504	12.3302		0.182083	17.0014	20.1311
0.1825	19.3276	22.2172	12.5131		0.1825	17.1161	20.4602
0.182917	19.2815	22.0639	12.2115		0.182917	17.0846	20.468
0.183333	19.3541	21.9582	12.2937		0.183333	17.1036	20.4985
0.18375	19.3757	21.9651	12.4345		0.18375	17.1202	20.4226
0.184167	19.4801	22.0154	12.4178		0.184167	17.0062	20.771
0.184583	19.4836	22.1014	12.2805		0.184583	16.9396	20.631
0.185	19.44	22.0416	12.3384		0.185	17.1252	20.9271
0.185417	19.3855	22.0389	12.2007		0.185417	16.9843	20.9011
0.185833	19.3226	21.8525	12.0776		0.185833	17.0312	20.2384
0.18625	19.2	22.0092	12.0566		0.18625	17.0435	20.5742
0.186667	19.2154	22.0516	12.0329		0.186667	17.008	20.224
0.187083	19.4264	21.903	11.9665		0.187083	17.0214	20.5405
0.1875	19.2291	22.1366	11.9248		0.1875	17.1254	20.7778
0.187917	19.1041	22.2004	11.9634		0.187917	17.0296	20.4686
0.188333	19.1794	22.0305	11.9782		0.188333	17.1966	20.7396
0.18875	19.1546	21.9754	11.8781		0.18875	17.075	20.599
0.189167	19.4313	22.173	11.9806		0.189167	17.0044	20.6108
0.189583	19.2226	22.0433	11.9423		0.189583	17.145	20.4786
0.19	19.5461	22.1849	11.8745		0.19	17.0462	20.53
0.190417	19.6161	22.0129	11.9369		0.190417	16.9952	20.6038
0.190833	19.5243	22.0896	11.8854		0.190833	17.1113	21.0388
0.19125	19.397	22.0319	12.0714		0.19125	17.0901	20.6477
0.191667	19.4313	22.143	11.9231		0.191667	16.9203	20.7042
0.192083	19.765	22.1702	11.9111		0.192083	17.1882	20.6569
0.1925	19.6171	22.1361	11.9959		0.1925	17.0725	20.8882
0.192917	19.561	22.259	11.8465		0.192917	17.0242	20.3826
0.193333	19.2173	22.2258	11.8494		0.193333	17.0194	20.1365
0.19375	19.2449	22.2184	11.777		0.19375	16.9196	20.8465
0.194167	19.4863	22.2396	11.9592		0.194167	16.9258	21.4371
0.194583	19.4801	22.0341	11.9169		0.194583	17.0859	21.3532
0.195	19.4699	22.0837	11.8536		0.195	16.9753	20.8624
0.195417	19.3046	22.194	11.8915		0.195417	16.9375	20.1732
0.195833	19.5201	22.127	11.8235		0.195833	17.0634	20.3625
0.19625	19.515	22.0668	11.7603		0.19625	16.9867	20.9535
0.196667	19.4223	22.1913	11.8537		0.196667	17.1364	20.4277
0.197083	19.544	22.1955	11.7661		0.197083	17.0392	20.5401
0.1975	19.4521	22.0859	11.8222		0.1975	17.0853	20.9364
0.197917	19.7202	22.2722	11.7455		0.197917	17.1917	20.4261
0.198333	19.5961	22.4172	11.7722		0.198333	17.1056	20.6347
0.19875	19.6744	22.2731	11.8845		0.19875	17.1441	21.1479
0.199167	19.8828	22.1056	11.6579		0.199167	17.1726	20.859
0.199583	19.7485	21.9807	11.7246		0.199583	17.08	20.9329
0.2	19.4095	22.1711	11.6579		0.2	17.1672	21.1139
0.200417	19.5772	22.4591	11.7361		0.200417	17.1432	20.9897
0.200833	19.5421	22.1068	11.5503		0.200833	17.0072	20.9527
0.20125	19.5015	22.4194	11.663		0.20125	17.2413	20.8871
0.201667	19.6327	22.25	11.8144		0.201667	17.1023	20.8767
0.202083	19.5621	22.2975	11.8928		0.202083	17.0372	20.7165
0.2025	19.6486	22.2208	11.7593		0.2025	17.2897	20.733
0.202917	19.5211	22.2535	11.7387		0.202917	17.0717	20.4653
0.203333	20.0421	22.2223	11.8385		0.203333	17.1164	20.9985
0.20375	19.7066	22.205	12.0265		0.20375	17.1857	21.0184
0.204167	19.6977	22.4629	11.7739		0.204167	17.0786	20.9897
0.204583	19.7175	22.154	11.7393		0.204583	17.208	20.832
0.205	19.7939	22.3873	11.4754		0.205	17.1376	21.0069
0.205417	19.8109	22.3231	11.7052		0.205417	17.1532	20.511
0.205833	19.7259	22.2341	11.6769		0.205833	17.229	20.8878
0.20625	19.6866	22.1359	11.4141		0.20625	17.0475	21.2908
0.206667	19.5086	22.3032	11.4129		0.206667	17.2254	20.901
0.207083	19.5002	22.1177	11.3997		0.207083	17.3248	20.7414
0.2075	19.7341	22.3497	11.4441		0.2075	17.1276	20.674
0.207917	19.5712	22.4337	11.3547		0.207917	17.1327	20.8567
0.208333	19.5622	22.5271	11.3728		0.208333	17.0884	20.6942
0.20875	19.491	22.3508	11.2982		0.20875	17.0639	20.8406
0.209167	19.7774	22.281	11.4012		0.209167	17.1707	21.0386
0.209583	19.5671	22.4176	11.4348		0.209583	17.1896	21.5815
0.21	19.7778	22.3469	11.7278		0.21	17.1791	21.3354
0.210417	19.7395	22.4608	11.4815		0.210417	17.1983	20.9672
0.210833	19.7232	22.4357	11.4982		0.210833	17.0118	21.1483
0.21125	19.7129	22.3849	11.4956		0.21125	17.2232	21.1682
0.211667	19.8212	22.36	11.5056		0.211667	17.2502	20.876
0.212083	19.671	22.4448	11.27		0.212083	17.0912	20.8023
0.2125	19.7788	22.4066	11.4481		0.2125	17.1979	20.7884
0.212917	19.8009	22.3707	11.199		0.212917	17.1429	20.4729
0.213333	19.9016	22.2556	11.3884		0.213333	16.9859	20.7333
0.21375	19.8921	22.36	11.2939		0.21375	17.1002	21.0281
0.214167	19.6927	22.4149	11.259		0.214167	17.0847	20.6132
0.214583	19.7423	22.5295	11.2037		0.214583	17.0659	20.6013
0.215	19.7691	22.213	11.3989		0.215	17.1698	20.8289
0.215417	19.9079	22.3316	11.4199		0.215417	17.0155	20.9638
0.215833	19.9145	22.3289	11.4521		0.215833	17.1426	21.2287
0.21625	19.6003	22.44	11.2844		0.21625	16.9488	20.887
0.216667	19.7547	22.1608	11.3126		0.216667	16.9379	20.7849
0.217083	19.9792	22.3559	11.2109		0.217083	17.1355	20.8132
0.2175	20.0172	22.6231	11.1923		0.2175	16.9823	20.7638
0.217917	19.7095	22.5307	11.322		0.217917	16.9859	20.745
0.218333	20.0294	22.3426	11.2904		0.218333	17.0778	20.9242
0.21875	19.9372	22.4188	11.2861		0.21875	16.989	21.2758
0.219167	19.9684	22.4979	11.3226		0.219167	17.0177	21.101
0.219583	19.9093	22.3465	11.2475		0.219583	17.1673	20.9507
0.22	19.871	22.5297	11.2358		0.22	17.0018	21.2825
0.220417	19.9124	22.2916	11.2506		0.220417	17.1384	21.3436
0.220833	19.7221	22.4269	11.367		0.220833	17.0051	21.1714
0.22125	19.9189	22.4576	11.2942		0.22125	17.0403	20.9457
0.221667	20.0804	22.3884	11.3168		0.221667	17.1265	21.5268
0.222083	20.0484	22.4868	11.1614		0.222083	17.0108	21.2678
0.2225	19.9343	22.4083	11.2728		0.2225	17.0592	21.3637
0.222917	19.8161	22.4494	11.2935		0.222917	17.0602	21.5025
0.223333	20.1014	22.4371	11.1682		0.223333	16.9768	21.2948
0.22375	20.0985	22.6041	11.2164		0.22375	17.1361	21.2123
0.224167	19.8676	22.5314	11.1153		0.224167	17.0456	21.5982
0.224583	20.0992	22.4271	11.1851		0.224583	16.9928	21.2484
0.225	20.2262	22.4547	11.115		0.225	17.0722	21.3439
0.225417	20.2177	22.3668	11.1019		0.225417	17.0635	21.1713
0.225833	20.0843	22.411	11.1541		0.225833	17.2264	20.9488
0.22625	19.9191	22.3339	11.1736		0.22625	17.0759	20.8554
0.226667	20.1129	22.5008	11.1783		0.226667	16.9903	21.1054
0.227083	20.3556	22.6089	11.2119		0.227083	17.1511	21.1649
0.2275	20.1784	22.456	11.1626		0.2275	17.0202	21.2435
0.227917	20.2663	22.5226	11.0908		0.227917	17.1068	21.1515
0.228333	20.1219	22.4863	10.9108		0.228333	17.1158	21.3906
0.22875	19.9586	22.3721	11.2032		0.22875	17.0491	21.1291
0.229167	19.7754	22.4844	11.3003		0.229167	17.2293	21.3857
0.229583	20.0336	22.3936	11.2951		0.229583	17.0906	21.2531
0.23	20.1689	22.3561	11.3287		0.23	17.0168	21.2333
0.230417	19.9642	22.5066	11.0451		0.230417	17.0285	20.9821
0.230833	20.028	22.4096	11.1629		0.230833	16.9409	21.2674
0.23125	19.9574	22.3841	11.09		0.23125	17.1082	21.2394
0.231667	19.9724	22.6929	11.271		0.231667	17.1366	21.2464
0.232083	20.3302	22.5999	11.1653		0.232083	17.1147	21.4111
0.2325	20.4474	22.5602	11.2377		0.2325	17.2062	21.2941
0.232917	20.2615	22.3545	11.3386		0.232917	17.076	21.0666
0.233333	20.355	22.6653	11.3782		0.233333	17.1569	21.4395
0.23375	20.1608	22.7629	11.4404		0.23375	17.1707	21.7584
0.234167	20.256	22.5383	11.2576		0.234167	17.0795	21.6127
0.234583	20.2464	22.6019	11.1448		0.234583	17.2214	21.232
0.235	20.4041	22.479	11.2723		0.235	17.132	21.3921
0.235417	20.2916	22.5428	11.4034		0.235417	17.0313	20.8843
0.235833	19.9958	22.3996	11.3097		0.235833	17.2139	21.1513
0.23625	20.0672	22.7469	11.3581		0.23625	17.12	21.5256
0.236667	20.2633	22.6354	11.3803		0.236667	17.1382	21.4433
0.237083	20.3906	22.5419	11.1606		0.237083	17.1963	21.2519
0.2375	20.2677	22.8348	11.0938		0.2375	17.1731	21.3417
0.237917	20.3398	22.7302	11.1357		0.237917	17.1564	21.6068
0.238333	20.2647	22.5761	11.2434		0.238333	17.1452	21.6632
0.23875	20.2502	22.5648	11.3301		0.23875	17.1222	21.5909
0.239167	20.2974	22.5191	11.2069		0.239167	17.3077	21.2198
0.239583	20.4533	22.6213	11.3028		0.239583	17.2146	21.2865
0.24	20.6183	22.6821	11.3553		0.24	17.2115	21.6702
0.240417	20.5674	22.7144	11.2788		0.240417	17.1903	21.7843
0.240833	20.4972	22.7093	11.1958		0.240833	17.1147	21.5347
0.24125	20.1803	22.5914	11.2367		0.24125	17.2198	22.0866
0.241667	20.3784	22.5381	11.3397		0.241667	17.1477	21.7173
0.242083	20.5184	22.5834	11.4733		0.242083	17.1327	21.8534
0.2425	20.3976	22.8315	11.2332		0.2425	17.2086	21.4116
0.242917	20.2947	22.738	11.1605		0.242917	17.1652	21.3089
0.243333	20.6279	22.8559	11.3411		0.243333	17.1682	21.3468
0.24375	20.7831	22.8145	11.293		0.24375	17.2474	21.6742
0.244167	20.6643	22.703	11.3655		0.244167	17.1525	21.5684
0.244583	20.8812	22.723	11.3629		0.244583	17.2834	21.4101
0.245	20.6993	22.8425	11.4439		0.245	17.2411	21.3828
0.245417	20.5005	22.7169	11.3634		0.245417	17.1384	21.4939
0.245833	20.3167	22.6908	11.1898		0.245833	17.1988	21.4818
0.24625	20.5254	22.7753	11.0048		0.24625	17.1427	21.7265
0.246667	20.419	22.8353	11.1342		0.246667	17.1578	21.7159
0.247083	20.4981	22.6569	11.3257		0.247083	17.2405	21.6696
0.2475	20.471	22.9178	11.3389		0.2475	17.2155	21.8039
0.247917	20.306	22.8318	11.1247		0.247917	17.1842	22.0087
0.248333	20.3096	22.9931	11.2847		0.248333	17.2471	21.6429
0.24875	20.511	22.9896	11.1412		0.24875	17.2221	21.6765
0.249167	20.4923	22.8868	11.0386		0.249167	17.2699	21.5914
0.249583	20.4907	22.9541	11.2352		0.249583	17.267	21.6042
0.25	20.5411	22.8419	11.2871		0.25	17.1987	21.9287
0.250417	20.6791	22.8518	11.3042		0.250417	17.2855	21.5306
0.250833	20.7148	22.9217	11.2833		0.250833	17.1831	21.7213
0.25125	20.8357	22.9815	11.1326		0.25125	17.235	21.7897
0.251667	20.7556	22.6743	10.9545		0.251667	17.355	21.9066
0.252083	20.7313	22.7895	11.0609		0.252083	17.239	22.1765
0.2525	20.6455	22.8805	11.0456		0.2525	17.3578	22.0707
0.252917	20.6472	22.7857	11.1992		0.252917	17.2737	22.0066
0.253333	20.4448	22.7101	11.248		0.253333	17.1769	21.8318
0.25375	20.7533	22.9069	10.8352		0.25375	17.3092	21.8724
0.254167	20.7883	22.9517	10.8788		0.254167	17.202	21.6442
0.254583	20.8536	23.0074	10.9553		0.254583	17.2408	21.7868
0.255	20.7837	22.9605	10.8622		0.255	17.2798	21.573
0.255417	20.878	22.8547	11.0644		0.255417	17.1265	21.7248
0.255833	20.8137	23.1237	11.1626		0.255833	17.2073	21.6769
0.25625	20.815	23.1818	11.1971		0.25625	17.2091	21.864
0.256667	20.6374	23.0267	10.7783		0.256667	17.2081	21.9937
0.257083	20.7914	22.9139	10.9004		0.257083	17.255	21.6945
0.2575	20.7745	22.9729	10.893		0.2575	17.1674	21.6913
0.257917	20.6244	22.9669	10.7886		0.257917	17.2179	22.1331
0.258333	20.6407	22.9774	10.8943		0.258333	17.2993	21.9277
0.25875	20.9702	22.9642	11.0159		0.25875	17.1937	21.9366
0.259167	20.8302	23.1563	11.0118		0.259167	17.2581	22.056
0.259583	20.8527	23.0875	10.9177		0.259583	17.3027	21.8993
0.26	20.8357	23.0834	11.1402		0.26	17.1291	21.7243
0.260417	20.804	22.9853	11.2106		0.260417	17.2147	21.5252
0.260833	21.0534	23.0286	11.0116		0.260833	17.2204	21.541
0.26125	21.0186	23.0441	10.9898		0.26125	17.2068	21.4738
0.261667	20.9946	23.1533	10.8836		0.261667	17.2681	21.9166
0.262083	20.9641	23.0703	10.9434		0.262083	17.1864	22.5104
0.2625	20.9972	23.0983	10.858		0.2625	17.2785	22.4263
0.262917	20.7906	23.0669	11.0031		0.262917	17.1971	22.6564
0.263333	20.9402	23.1766	10.9579		0.263333	17.1541	22.2261
0.26375	20.899	23.294	11.0935		0.26375	17.2966	22.156
0.264167	20.7192	23.1158	11.0856		0.264167	17.2384	22.1392
0.264583	20.9706	22.9426	10.9946		0.264583	17.226	22.4188
0.265	20.9696	23.0299	10.8993		0.265	17.2586	21.8103
0.265417	21.3671	23.129	10.9202		0.265417	17.1985	21.7065
0.265833	20.9751	23.102	10.8781		0.265833	17.2753	21.6478
0.26625	21.1055	23.2935	10.9666		0.26625	17.1502	22.0533
0.266667	21.1156	22.9849	11.0452		0.266667	17.1649	22.0849
0.267083	21.176	23.0645	10.9605		0.267083	17.2971	21.7872
0.2675	21.0122	23.2261	11.2029		0.2675	17.1754	21.8094
0.267917	20.9067	23.2461	11.0402		0.267917	17.2373	22.1981
0.268333	20.8376	23.2985	11.0169		0.268333	17.2035	22.2368
0.26875	21.0596	23.2009	10.8721		0.26875	17.2017	21.8926
0.269167	21.1975	23.0573	11.1911		0.269167	17.4051	21.6942
0.269583	21.0754	23.3595	11.1168		0.269583	17.234	21.8284
0.27	20.8626	23.2302	11.1022		0.27	17.2607	22.4473
0.270417	21.0846	23.3553	11.0261		0.270417	17.2193	22.0087
0.270833	21.0722	23.2965	11.0397		0.270833	17.2391	22.4062
0.27125	21.2229	23.3291	11.214		0.27125	17.2921	21.8348
0.271667	21.2589	23.1674	11.1369		0.271667	17.2277	21.8485
0.272083	21.1538	23.2893	11.2169		0.272083	17.2292	22.2339
0.2725	21.0242	23.4123	11.1102		0.2725	17.2727	22.2879
0.272917	21.1835	23.2498	11.0492		0.272917	17.2608	22.5279
0.273333	21.2659	23.1594	10.9004		0.273333	17.3233	22.2359
0.27375	21.1655	23.5149	11.2027		0.27375	17.2573	21.8235
0.274167	21.1565	23.2178	11.1226		0.274167	17.2423	21.9561
0.274583	21.1179	23.2292	11.1192		0.274583	17.3568	21.9855
0.275	21.1602	23.3711	11.0695		0.275	17.2783	21.9639
0.275417	21.3863	23.3809	10.8673		0.275417	17.3108	22.0959
0.275833	21.5364	23.1854	11.2469		0.275833	17.298	22.4382
0.27625	21.1961	23.611	11.1274		0.27625	17.154	22.5367
0.276667	21.1569	23.4542	11.1069		0.276667	17.3064	22.5798
0.277083	21.3675	23.5022	11.1505		0.277083	17.3115	22.4379
0.2775	21.3084	23.4306	11.1002		0.2775	17.1765	22.3691
0.277917	21.2907	23.2575	11.2801		0.277917	17.3307	22.3942
0.278333	21.3061	23.2589	11.2407		0.278333	17.2371	22.5556
0.27875	21.2028	23.2887	11.3535		0.27875	17.2843	22.7858
0.279167	21.592	23.4577	11.3025		0.279167	17.4012	22.7849
0.279583	21.5983	23.5018	11.2225		0.279583	17.2784	22.4562
0.28	21.5037	23.4889	11.2316		0.28	17.354	22.1022
0.280417	21.6613	23.605	11.1076		0.280417	17.3587	22.0847
0.280833	21.7052	23.6932	11.0719		0.280833	17.299	22.3681
0.28125	21.6168	23.5979	11.1174		0.28125	17.3789	22.7068
0.281667	21.516	23.4784	11.156		0.281667	17.2732	22.4356
0.282083	21.5159	23.6458	11.2959		0.282083	17.2276	22.3804
0.2825	21.4136	23.6895	11.0203		0.2825	17.3153	22.3925
0.282917	21.5616	23.7722	11.222		0.282917	17.2713	22.4241
0.283333	21.7149	23.7299	11.1204		0.283333	17.2968	22.3936
0.28375	21.6585	23.7458	11.1317		0.28375	17.3804	22.3528
0.284167	21.5301	23.9478	11.2227		0.284167	17.2315	22.2686
0.284583	21.4814	23.9489	11.5134		0.284583	17.2728	22.4307
0.285	21.6794	23.9205	11.4535		0.285	17.3539	22.1074
0.285417	21.6088	23.8455	11.2946		0.285417	17.2937	22.195
0.285833	21.6603	23.9002	11.2357		0.285833	17.4091	22.0489
0.28625	21.758	23.6989	11.2147		0.28625	17.3654	22.7753
0.286667	21.8415	23.7362	11.4412		0.286667	17.3568	22.5837
0.287083	21.8555	23.8007	11.3524		0.287083	17.3916	22.378
0.2875	21.7822	23.9048	11.4214		0.2875	17.2924	22.6014
0.287917	21.8189	23.694	11.3861		0.287917	17.403	22.4401
0.288333	21.883	23.7047	11.2991		0.288333	17.3334	22.4554
0.28875	21.8286	23.7954	11.2962		0.28875	17.365	22.1589
0.289167	21.8282	23.8811	11.2391		0.289167	17.4571	22.5636
0.289583	21.7032	23.9491	11.1286		0.289583	17.2856	22.8205
0.29	21.9638	23.9538	11.331		0.29	17.3566	22.8984
0.290417	22.0072	23.8664	11.4001		0.290417	17.3726	22.2634
0.290833	21.8441	23.8806	11.3356		0.290833	17.3238	22.4893
0.29125	21.699	23.9007	11.3397		0.29125	17.4029	22.5171
0.291667	21.8685	24.0444	11.2331		0.291667	17.3465	22.6083
0.292083	21.973	24.0053	11.0282		0.292083	17.3285	22.2875
0.2925	22.0837	24.0506	11.1247		0.2925	17.4471	22.5022
0.292917	21.9625	23.9309	11.1535		0.292917	17.3854	22.3781
0.293333	21.873	24.0559	10.9946		0.293333	17.3068	22.6273
0.29375	22.1203	24.1548	11.0308		0.29375	17.4819	22.7123
0.294167	22.0549	24.1127	11.1931		0.294167	17.3705	22.6644
0.294583	21.9615	24.0629	11.192		0.294583	17.3318	22.9413
0.295	22.101	24.0381	11.3617		0.295	17.46	22.5317
0.295417	22.1838	24.0509	11.2596		0.295417	17.391	22.329
0.295833	21.8659	24.0903	11.2201		0.295833	17.3605	22.5301
0.29625	22.002	24.202	11.2227		0.29625	17.444	22.74
0.296667	22.0892	24.1511	11.1582		0.296667	17.2922	22.5293
0.297083	22.236	24.0715	11.047		0.297083	17.4314	22.6524
0.2975	22.1409	23.7334	11.1269		0.2975	17.333	22.6074
0.297917	22.2332	24.1422	11.0653		0.297917	17.3134	22.5895
0.298333	22.054	24.0576	11.1895		0.298333	17.4294	22.5786
0.29875	22.066	23.9859	11.3223		0.29875	17.3924	22.5103
0.299167	22.178	24.2487	11.2304		0.299167	17.3744	22.5242
0.299583	22.2184	24.0921	11.0345		0.299583	17.4057	22.6043
0.3	22.0556	24.1806	11.0568		0.3	17.3529	22.5513
0.300417	22.119	24.3012	11.2451		0.300417	17.451	22.3664
0.300833	22.1128	24.153	11.2878		0.300833	17.3775	22.7583
0.30125	22.2008	24.1441	11.3252		0.30125	17.3132	23.0123
0.301667	22.2978	24.1247	11.3483		0.301667	17.4812	22.6802
0.302083	21.9264	24.0477	11.3617		0.302083	17.3985	22.8633
0.3025	22.237	24.1556	11.4303		0.3025	17.3323	22.8472
0.302917	22.2645	24.3267	11.294		0.302917	17.4177	23.0091
0.303333	22.2401	24.3526	11.3825		0.303333	17.3862	22.8315
0.30375	22.3932	24.4816	11.4407		0.30375	17.4422	23.2373
0.304167	22.0444	24.5699	11.4091		0.304167	17.4866	23.482
0.304583	22.3358	24.7267	11.4314		0.304583	17.3457	23.4304
0.305	22.4793	24.5146	11.5411		0.305	17.4739	23.3647
0.305417	22.316	24.586	11.4343		0.305417	17.364	23.0616
0.305833	22.294	24.4622	11.2665		0.305833	17.416	22.7542
0.30625	22.2381	24.5278	11.313		0.30625	17.4262	22.8096
0.306667	22.4632	24.4462	11.1964		0.306667	17.3384	22.7984
0.307083	22.3368	24.4823	11.2772		0.307083	17.4598	22.7188
0.3075	22.3881	24.5765	11.3984		0.3075	17.4043	22.7086
0.307917	22.3127	24.5308	11.4125		0.307917	17.4305	22.7968
0.308333	22.2059	24.5072	11.2777		0.308333	17.4522	23.1749
0.30875	22.488	24.4224	11.2267		0.30875	17.3782	23.0444
0.309167	22.4867	24.6485	11.3802		0.309167	17.3772	22.6885
0.309583	22.3796	24.6433	11.1727		0.309583	17.4302	22.9164
0.31	22.4948	24.4188	11.3181		0.31	17.3898	22.8704
0.310417	22.3174	24.4613	11.3044		0.310417	17.3744	22.8813
0.310833	22.5014	24.664	11.3025		0.310833	17.4291	22.9789
0.31125	22.4322	24.5893	11.4974		0.31125	17.2722	23.0864
0.311667	22.4477	24.6224	11.3351		0.311667	17.3187	23.0878
0.312083	22.477	24.4638	11.3821		0.312083	17.5295	22.9678
0.3125	22.5935	24.5528	11.2303		0.3125	17.3365	22.9843
0.312917	22.3701	24.4474	11.1592		0.312917	17.3978	22.9325
0.313333	22.379	24.6161	11.3093		0.313333	17.4053	23.198
0.31375	22.5231	24.7596	11.4875		0.31375	17.3518	23.2644
0.314167	22.6809	24.6436	11.357		0.314167	17.4062	23.0676
0.314583	22.764	24.8541	11.5258		0.314583	17.319	23.1876
0.315	22.8188	24.9362	11.597		0.315	17.433	23.0581
0.315417	22.8107	24.6572	11.4263		0.315417	17.4652	22.8904
0.315833	22.7261	24.7729	11.5237		0.315833	17.4075	23.0468
0.31625	22.9025	24.7829	11.5461		0.31625	17.511	23.0352
0.316667	22.7625	24.6194	11.5526		0.316667	17.4215	22.9105
0.317083	22.8324	24.4757	11.4339		0.317083	17.3628	22.9774
0.3175	22.8869	24.6253	11.3223		0.3175	17.4934	23.1636
0.317917	22.6736	24.6493	11.4118		0.317917	17.3547	23.0242
0.318333	22.9039	24.6453	11.459		0.318333	17.4581	23.1306
0.31875	22.8949	24.8222	11.4359		0.31875	17.5254	23.2652
0.319167	23.0059	24.9234	11.72		0.319167	17.3692	23.4877
0.319583	23.1433	24.6717	11.673		0.319583	17.4466	23.2465
0.32	22.9676	24.9034	11.5915		0.32	17.4937	23.3207
0.320417	22.9106	24.8208	11.4867		0.320417	17.3294	23.1755
0.320833	22.8808	24.8865	11.5907		0.320833	17.4899	23.3368
0.32125	22.8668	25.0163	11.4848		0.32125	17.478	23.5649
0.321667	23.0234	25.0052	11.3497		0.321667	17.4466	23.3876
0.322083	23.0829	24.8442	11.3982		0.322083	17.5597	23.343
0.3225	23.129	24.8314	11.7999		0.3225	17.5036	23.6805
0.322917	23.0589	24.7536	11.6192		0.322917	17.479	23.2678
0.323333	23.0301	25.0288	11.5273		0.323333	17.5013	23.5363
0.32375	23.1945	24.8853	11.473		0.32375	17.4261	23.5586
0.324167	23.1697	25.2126	11.789		0.324167	17.488	23.4305
0.324583	23.1503	25.0537	11.6162		0.324583	17.5585	23.3641
0.325	23.1792	25.3121	11.5836		0.325	17.4742	23.6274
0.325417	23.1194	25.0823	11.7597		0.325417	17.5899	24.2953
0.325833	23.0465	25.0097	11.6802		0.325833	17.5228	23.5205
0.32625	23.284	25.1739	11.9101		0.32625	17.5019	23.6264
0.326667	23.2205	25.2483	11.9377		0.326667	17.5432	23.545
0.327083	23.1314	25.2127	11.8632		0.327083	17.4958	23.5956
0.3275	23.1098	25.2084	11.8379		0.3275	17.5982	23.3281
0.327917	23.2225	25.2941	11.7404		0.327917	17.56	23.9594
0.328333	23.255	25.3767	12.052		0.328333	17.5165	23.6402
0.32875	23.3159	25.2051	12.0119		0.32875	17.6365	24
0.329167	23.4468	25.3127	11.9882		0.329167	17.6255	23.6444
0.329583	23.5779	25.379	12.0561		0.329583	17.5451	23.7619
0.33	23.58	25.3072	12.2464		0.33	17.611	23.8423
0.330417	23.5047	25.4324	12.1156		0.330417	17.5333	23.8878
0.330833	23.4997	25.3521	12.3864		0.330833	17.5856	24.6433
0.33125	23.3268	25.1829	12.5453		0.33125	17.5973	23.7359
0.331667	23.5239	25.3927	12.4776		0.331667	17.628	23.7432
0.332083	23.561	25.357	12.3969		0.332083	17.5742	23.5381
0.3325	23.7126	25.4598	12.1216		0.3325	17.586	23.6577
0.332917	23.4776	25.4268	12.2015		0.332917	17.6364	23.8345
0.333333	23.6502	25.5679	12.4317		0.333333	17.6794	23.4941
0.33375	23.7828	25.614	12.2812		0.33375	17.5667	23.6187
0.334167	23.7691	25.663	12.3188		0.334167	17.6717	23.7839
0.334583	23.5842	25.6895	12.2436		0.334583	17.6283	23.4689
0.335	23.4291	25.7386	12.3201		0.335	17.5952	23.5837
0.335417	23.5529	25.6202	13.1899		0.335417	17.6466	23.6261
0.335833	23.4938	25.7094	13.1827		0.335833	17.5959	23.6499
0.33625	23.8426	25.8566	12.9727		0.33625	17.6519	23.8362
0.336667	23.6878	25.811	13.005		0.336667	17.6332	23.8027
0.337083	23.5869	25.7819	12.9077		0.337083	17.5644	23.8339
0.3375	23.836	26.0663	12.8051		0.3375	17.6345	23.8536
0.337917	23.6723	25.7371	12.899		0.337917	17.588	23.683
0.338333	23.6521	25.8439	12.9615		0.338333	17.5814	23.761
0.33875	23.6831	25.7414	13.0673		0.33875	17.5816	23.9222
0.339167	23.6695	25.7555	12.793		0.339167	17.5824	23.7034
0.339583	23.5172	25.9483	12.8537		0.339583	17.6575	23.8889
0.34	23.857	26.0192	12.6791		0.34	17.6096	23.7446
0.340417	23.7557	25.9943	12.6189		0.340417	17.6343	23.7819
0.340833	23.7682	26.0533	12.8395		0.340833	17.6614	24.2361
0.34125	24.0736	26.2336	12.8021		0.34125	17.5696	24.3611
0.341667	24.0515	26.0867	12.8553		0.341667	17.7158	24.048
0.342083	24.0359	25.9953	12.9725		0.342083	17.6322	23.9955
0.3425	24.0829	26.1006	12.8414		0.3425	17.5781	23.7875
0.342917	24.0958	26.0469	12.7505		0.342917	17.6325	23.8867
0.343333	24.0941	26.0741	12.7427		0.343333	17.6067	24.0624
0.34375	23.9907	26.1242	12.8573		0.34375	17.6911	24.0437
0.344167	23.9731	26.1597	12.7214		0.344167	17.6898	23.9263
0.344583	24.2011	26.1018	12.92		0.344583	17.6763	24.346
0.345	24.0165	26.0714	12.8548		0.345	17.7345	24.3479
0.345417	24.0691	26.0858	12.8534		0.345417	17.6801	24.3719
0.345833	24.0615	26.1222	12.7844		0.345833	17.6561	24.1825
0.34625	24.227	26.2811	12.8869		0.34625	17.6387	24.0779
0.346667	24.1433	26.2725	12.8043		0.346667	17.6681	24.0653
0.347083	24.1312	26.1563	12.8944		0.347083	17.6927	24.4554
0.3475	24.1867	26.0733	12.8832		0.3475	17.5846	24.0066
0.347917	24.1174	26.1447	12.93		0.347917	17.6899	24.1597
0.348333	24.1608	26.2902	12.8743		0.348333	17.7214	24.2273
0.34875	24.206	26.3818	13.0094		0.34875	17.6994	24.3586
0.349167	24.213	26.2412	12.9411		0.349167	17.7394	24.3164
0.349583	24.2547	26.3037	12.8749		0.349583	17.6648	24.3708
0.35	24.2419	26.432	12.7549		0.35	17.6738	24.549
0.350417	24.2139	26.4281	12.9535		0.350417	17.704	24.934
0.350833	24.2936	26.3433	12.8929		0.350833	17.6362	24.345
0.35125	24.3904	26.2727	12.8818		0.35125	17.7293	23.9936
0.351667	24.483	26.3616	12.8243		0.351667	17.7027	24.1116
0.352083	24.4307	26.4349	12.7581		0.352083	17.6055	24.5836
0.3525	24.2671	26.5621	12.7332		0.3525	17.671	24.241
0.352917	24.607	26.3999	12.7367		0.352917	17.6087	23.9756
0.353333	24.436	26.4657	12.8547		0.353333	17.7179	24.1747
0.35375	24.4179	26.4589	12.8212		0.35375	17.6806	24.5539
0.354167	24.6255	26.4784	12.7833		0.354167	17.645	24.4796
0.354583	24.6237	26.518	12.7634		0.354583	17.7393	24.2728
0.355	24.5675	26.5975	12.7657		0.355	17.6704	24.3572
0.355417	24.6553	26.6249	12.8427		0.355417	17.6305	24.4272
0.355833	24.4275	26.5519	12.8215		0.355833	17.7157	24.3505
0.35625	24.4803	26.628	12.7656		0.35625	17.6454	24.6933
0.356667	24.7891	26.5062	12.7122		0.356667	17.7795	24.5179
0.357083	24.6318	26.7827	12.6273		0.357083	17.6872	24.4377
0.3575	24.7012	26.7538	12.764		0.3575	17.6879	24.2752
0.357917	24.551	26.6258	12.7541		0.357917	17.7164	24.1529
0.358333	24.6102	26.5941	12.6619		0.358333	17.6785	24.2931
0.35875	24.4351	26.6623	12.6505		0.35875	17.7058	24.4008
0.359167	24.7056	26.6013	12.8016		0.359167	17.6686	24.7528
0.359583	24.838	26.6526	12.5945		0.359583	17.6425	24.5334
0.36	24.9276	26.6776	12.6965		0.36	17.7258	24.5378
0.360417	24.8226	26.7688	12.573		0.360417	17.6618	24.58
0.360833	24.7329	26.8322	12.6818		0.360833	17.7296	24.5831
0.36125	24.9383	26.9388	12.5444		0.36125	17.7271	24.732
0.361667	24.7842	26.8725	12.3945		0.361667	17.6786	24.4166
0.362083	24.9569	26.8484	12.5803		0.362083	17.846	24.6497
0.3625	24.8761	26.9475	12.4349		0.3625	17.6978	24.9134
0.362917	24.7321	27.147	12.4872		0.362917	17.682	24.488
0.363333	24.9664	26.9381	12.3902		0.363333	17.755	24.7281
0.36375	24.9101	26.9608	12.3256		0.36375	17.6775	24.7716
0.364167	24.9287	26.9539	12.3911		0.364167	17.7827	24.8019
0.364583	24.9315	26.9585	12.2406		0.364583	17.6799	24.6725
0.365	25.0564	27.0206	12.4712		0.365	17.6743	24.8187
0.365417	25.1198	26.9421	12.534		0.365417	17.7316	24.7458
0.365833	25.0739	27.1087	12.34		0.365833	17.6717	24.6087
0.36625	25.3173	27.0718	12.0689		0.36625	17.7345	24.5966
0.366667	25.0471	27.011	11.9664		0.366667	17.8044	24.5019
0.367083	25.1814	27.2983	11.8575		0.367083	17.6859	25.1623
0.3675	25.309	27.2393	11.5759		0.3675	17.8044	24.8113
0.367917	25.3535	27.1933	11.584		0.367917	17.7499	24.9873
0.368333	25.266	27.3396	11.6357		0.368333	17.7959	24.8424
0.36875	25.2982	27.2827	11.7629		0.36875	17.8248	24.8396
0.369167	25.1299	27.2907	11.5908		0.369167	17.7993	25.0957
0.369583	25.3104	27.3217	11.6937		0.369583	17.8743	25.015
0.37	25.5027	27.3258	11.8627		0.37	17.7574	25.3067
0.370417	25.4418	27.0406	11.7835		0.370417	17.8244	24.938
0.370833	25.6102	27.425	11.925		0.370833	17.8869	25.1035
0.37125	25.4928	27.5742	11.8845		0.37125	17.8153	25.0037
0.371667	25.4774	27.5377	11.9407		0.371667	17.9212	24.9874
0.372083	25.4865	27.4568	11.9416		0.372083	17.8358	24.8412
0.3725	25.3978	27.3635	11.8881		0.3725	17.8466	24.9997
0.372917	25.6097	27.479	12.0379		0.372917	17.8663	25.4267
0.373333	25.6614	27.41	11.9949		0.373333	17.8226	25.275
0.37375	25.711	27.5194	11.6721		0.37375	17.9212	25.0391
0.374167	25.6815	27.6159	11.8098		0.374167	17.9318	25.1991
0.374583	25.6698	27.5031	11.8932		0.374583	17.8079	25.422
0.375	25.807	27.5701	11.8988		0.375	17.8498	25.2164
0.375417	25.6534	27.8793	11.8517		0.375417	17.9092	25.1902
0.375833	25.6502	27.8569	11.9465		0.375833	17.8917	25.1885
0.37625	25.589	27.7801	12.2444		0.37625	17.9777	25.2699
0.376667	25.56	27.8354	11.7456		0.376667	17.9288	25.1867
0.377083	25.6106	27.882	11.8293		0.377083	17.9181	25.274
0.3775	25.8003	27.918	11.85		0.3775	17.9071	25.0892
0.377917	26.0895	27.7244	11.6659		0.377917	17.8873	25.3262
0.378333	25.9332	27.9581	12.042		0.378333	18.007	25.4456
0.37875	25.9462	27.9746	11.82		0.37875	17.9375	25.2126
0.379167	25.8667	27.9607	11.789		0.379167	17.9503	25.49
0.379583	25.7988	28.0713	11.8338		0.379583	18.0334	25.4054
0.38	26.1153	27.9184	11.9451		0.38	17.8867	25.6806
0.380417	25.9597	27.9454	12.0537		0.380417	17.9174	25.61
0.380833	25.9455	27.8128	11.8016		0.380833	17.9835	25.4982
0.38125	25.939	27.8401	12.0126		0.38125	17.9445	25.3269
0.381667	25.908	27.7952	11.8039		0.381667	18.042	25.3962
0.382083	25.7189	28.1924	11.7541		0.382083	17.9946	25.445
0.3825	25.9368	27.9906	11.8072		0.3825	17.9329	25.309
0.382917	26.108	28.0735	11.6503		0.382917	17.9766	25.2265
0.383333	26.0075	28.1813	11.8634		0.383333	17.9056	25.2661
0.38375	25.9802	28.1513	11.5474		0.38375	17.9855	25.252
0.384167	25.8806	28.0579	11.585		0.384167	18.0424	25.2674
0.384583	26.0717	28.2021	11.7369		0.384583	17.9696	25.1689
0.385	26.1831	27.9885	11.4771		0.385	18.1201	25.3963
0.385417	26.211	28.1377	11.5377		0.385417	18.0602	25.4696
0.385833	26.2814	28.0006	11.7302		0.385833	17.9506	25.6383
0.38625	26.101	28.128	11.6437		0.38625	18.0686	25.3767
0.386667	26.2795	28.2463	11.6597		0.386667	17.9858	25.777
0.387083	26.5481	28.3968	11.5714		0.387083	18.0684	25.6165
0.3875	26.4032	28.2119	11.6339		0.3875	17.9712	25.2569
0.387917	26.492	28.3157	11.4362		0.387917	18.033	25.4478
0.388333	26.2775	28.5278	11.445		0.388333	18.1135	25.6375
0.38875	26.3181	28.3136	11.5169		0.38875	17.9951	25.5101
0.389167	26.6201	28.2673	11.4672		0.389167	18.0592	25.6207
0.389583	26.4673	28.3005	11.8022		0.389583	18.1642	25.6509
0.39	26.5471	28.3692	11.6452		0.39	18.0506	25.6293
0.390417	26.7202	28.3783	11.482		0.390417	18.0998	25.6461
0.390833	26.7564	28.454	11.3278		0.390833	18.2114	25.5062
0.39125	26.5676	28.517	11.4555		0.39125	18.0986	25.5785
0.391667	26.4573	28.3649	11.3289		0.391667	18.1235	25.5128
0.392083	26.7869	28.5725	11.4004		0.392083	18.1781	25.594
0.3925	26.6271	28.436	11.203		0.3925	18.0845	25.7892
0.392917	26.6469	28.3112	11.4237		0.392917	18.1826	25.8757
0.393333	26.5557	28.3735	11.7884		0.393333	18.1081	25.7151
0.39375	26.5764	28.2879	11.5064		0.39375	18.0788	25.7299
0.394167	26.6243	28.393	11.4472		0.394167	18.1605	25.8478
0.394583	26.7799	28.6168	11.3524		0.394583	18.1288	25.9489
0.395	26.7244	28.5997	11.2209		0.395	18.1689	25.888
0.395417	26.7262	28.6635	11.4226		0.395417	18.1366	25.8541
0.395833	26.7988	28.5803	11.5871		0.395833	18.0935	26.0351
0.39625	26.8298	28.6971	11.4476		0.39625	18.1753	26.0564
0.396667	26.6645	28.8473	11.4558		0.396667	18.1707	25.8994
0.397083	26.7687	28.8241	11.35		0.397083	18.1598	25.8963
0.3975	26.7342	28.7346	11.6079		0.3975	18.247	25.7685
0.397917	26.8297	28.7401	11.5036		0.397917	18.1237	25.7605
0.398333	26.9405	28.8561	11.3117		0.398333	18.2132	25.9429
0.39875	26.9558	28.7479	11.5395		0.39875	18.1834	25.8619
0.399167	27.0164	28.8091	11.3872		0.399167	18.2234	26.0718
0.399583	26.8239	28.9321	11.3753		0.399583	18.2772	25.9387
0.4	26.961	29.0334	11.4386		0.4	18.1446	25.7871
0.400417	27.0251	28.9024	11.4592		0.400417	18.2173	25.8292
0.400833	26.9257	28.7711	11.2431		0.400833	18.2199	25.9359
0.40125	27.1024	28.8946	11.5673		0.40125	18.0504	26.073
0.401667	27.0436	28.9585	11.4773		0.401667	18.2954	26.0592
0.402083	26.9372	28.7935	11.3869		0.402083	18.2177	25.9195
0.4025	27.0626	29.0085	11.5223		0.4025	18.1551	25.7973
0.402917	27.0318	29.1983	11.5368		0.402917	18.3124	25.7661
0.403333	27.0675	28.9594	10.8783		0.403333	18.2167	26.0311
0.40375	26.9905	28.8662	10.075		0.40375	18.2964	25.9834
0.404167	27.023	29.1901	10.1788		0.404167	18.3215	26.0016
0.404583	26.9724	29.1111	10.3446		0.404583	18.2777	26.1961
0.405	27.1218	29.0193	10.5732		0.405	18.3439	26.4528
0.405417	27.3913	29.1106	12.5409		0.405417	18.3287	26.4487
0.405833	27.33	29.0358	14.3623		0.405833	18.2477	26.1971
0.40625	27.3252	29.1545	13.5857		0.40625	18.3574	26.2144
0.406667	27.2724	29.1986	13.269		0.406667	18.32	26.1329
0.407083	27.336	29.1977	13.1553		0.407083	18.3712	26.1687
0.4075	27.4977	29.4091	12.7283		0.4075	18.3895	26.285
0.407917	27.2528	29.4095	12.4715		0.407917	18.2941	26.1504
0.408333	27.563	29.3255	12.4017		0.408333	18.363	26.2992
0.40875	27.4257	29.4249	12.1168		0.40875	18.3668	26.3693
0.409167	27.4119	29.2499	11.2455		0.409167	18.3848	26.2455
0.409583	27.6541	29.4141	13.2491		0.409583	18.4495	26.2624
0.41	27.4864	29.3297	12.9586		0.41	18.4069	26.2731
0.410417	27.4531	29.2578	12.976		0.410417	18.3828	26.2715
0.410833	27.5851	29.2263	12.8895		0.410833	18.4751	26.042
0.41125	27.6522	29.3907	12.8147		0.41125	18.3802	26.0823
0.411667	27.6248	29.5833	12.9172		0.411667	18.4496	26.4537
0.412083	27.6476	29.518	12.9378		0.412083	18.4393	26.4624
0.4125	27.5713	29.6543	12.9355		0.4125	18.4001	26.2414
0.412917	27.5626	29.5524	12.6558		0.412917	18.5256	26.2171
0.413333	27.8564	29.6435	10.7132		0.413333	18.4379	26.5367
0.41375	27.6912	29.8466	9.64858		0.41375	18.516	26.2967
0.414167	27.8396	29.655	11.0003		0.414167	18.5286	26.4168
0.414583	27.9901	29.6859	10.4712		0.414583	18.4035	26.6497
0.415	28.0825	29.7085	11.1053		0.415	18.5106	26.5647
0.415417	28.1587	29.7338	11.0403		0.415417	18.4322	26.3577
0.415833	28.0045	29.7412	11.2757		0.415833	18.4765	26.6566
0.41625	27.9228	29.7414	10.6526		0.41625	18.5389	26.5461
0.416667	27.9397	29.5839	11.3899		0.416667	18.4487	26.3193
0.417083	27.9973	29.7439	11.5689		0.417083	18.542	26.4924
0.4175	27.9057	29.7574	10.4782		0.4175	18.5247	26.6801
0.417917	28.0569	29.9088	11.739		0.417917	18.5304	26.5945
0.418333	27.9075	29.8575	11.4963		0.418333	18.5803	26.6604
0.41875	27.9053	29.9096	11.1046		0.41875	18.5184	26.9405
0.419167	27.9096	30.0918	9.5701		0.419167	18.5062	26.8589
0.419583	27.8325	29.9476	11.0767		0.419583	18.6737	26.5027
0.42	28.0122	30.3272	11.312		0.42	18.5796	26.4997
0.420417	28.1085	30.065	11.4072		0.420417	18.6343	26.3611
0.420833	28.0541	30.0406	11.9135		0.420833	18.5879	26.5593
0.42125	28.0163	30.0179	13.1622		0.42125	18.5852	26.3709
0.421667	28.0391	30.2242	13.07		0.421667	18.6353	26.7838
0.422083	28.0507	30.2636	12.8423		0.422083	18.6072	26.6397
0.4225	28.1291	30.3253	12.6743		0.4225	18.6222	26.5711
0.422917	28.4936	29.9886	12.631		0.422917	18.6817	26.7058
0.423333	28.4196	30.0508	12.5063		0.423333	18.6134	26.7986
0.42375	28.4012	30.1476	12.4277		0.42375	18.662	26.7079
0.424167	28.2899	30.0935	12.5284		0.424167	18.6623	26.775
0.424583	28.4755	30.2782	12.5536		0.424583	18.6033	26.7495
0.425	28.4293	30.1693	12.3054		0.425	18.7529	26.774
0.425417	28.2569	30.2798	12.2236		0.425417	18.6932	26.8579
0.425833	28.386	30.3214	12.2724		0.425833	18.6327	26.875
0.42625	28.3232	30.3718	12.2332		0.42625	18.6808	26.8053
0.426667	28.4204	30.5203	12.2644		0.426667	18.6953	26.8766
0.427083	28.3816	30.2535	12.3057		0.427083	18.7116	27.117
0.4275	28.4174	30.5236	12.2385		0.4275	18.7622	27.0545
0.427917	28.6761	30.3797	12.4139		0.427917	18.6777	27.0116
0.428333	28.7459	30.4382	12.4433		0.428333	18.6643	27.0228
0.42875	28.5834	30.3276	12.4037		0.42875	18.6737	26.8168
0.429167	28.556	30.4771	12.5569		0.429167	18.7206	26.9048
0.429583	28.6354	30.5376	12.3632		0.429583	18.7373	26.9634
0.43	28.7069	30.6631	12.2943		0.43	18.6824	27.023
0.430417	28.5924	30.6167	12.4891		0.430417	18.7297	27.114
0.430833	28.5986	30.7123	12.6979		0.430833	18.7297	26.8823
0.43125	28.6826	30.7046	12.5752		0.43125	18.8002	26.9354
0.431667	28.8201	30.652	12.587		0.431667	18.808	26.8848
0.432083	28.9075	30.5383	12.6452		0.432083	18.7807	27.2197
0.4325	28.7133	30.6212	12.4821		0.4325	18.8432	26.9613
0.432917	28.889	30.4511	12.1464		0.432917	18.811	26.9442
0.433333	28.8683	30.5673	11.9283		0.433333	18.7662	26.9384
0.43375	28.8968	30.6854	11.4742		0.43375	18.864	27.1737
0.434167	29.1863	30.8242	11.4393		0.434167	18.7564	27.0862
0.434583	29.1687	30.8202	11.6318		0.434583	18.8504	27.1639
0.435	28.9154	30.868	11.7005		0.435	18.8849	27.1139
0.435417	29.0468	31.0078	11.4858		0.435417	18.8807	27.1894
0.435833	28.9887	31.118	11.4037		0.435833	18.9587	27.1419
0.43625	28.8746	31.1326	11.7062		0.43625	18.8785	27.4741
0.436667	28.9666	31.0214	12.1033		0.436667	18.9018	27.5241
0.437083	29.045	31.0915	12.144		0.437083	18.982	27.3827
0.4375	29.025	31.1003	12.2987		0.4375	18.8886	27.3684
0.437917	29.0793	31.067	11.2771		0.437917	18.9603	27.4678
0.438333	29.0282	31.0175	10.0936		0.438333	18.9151	27.4102
0.43875	29.1983	31.1499	9.98846		0.43875	18.8732	27.4934
0.439167	29.3427	31.2456	8.82992		0.439167	19.0276	27.1155
0.439583	29.1796	31.0956	12.1633		0.439583	18.872	27.4363
0.44	29.1222	31.3216	13.8995		0.44	18.9416	27.357
0.440417	29.1821	31.2355	13.2676		0.440417	19.0126	27.17
0.440833	29.299	31.2695	12.6788		0.440833	18.9405	27.5643
0.44125	29.1163	31.4979	12.1566		0.44125	19.0112	27.3102
0.441667	29.2994	31.3172	10.622		0.441667	18.9598	27.2657
0.442083	29.47	31.3296	10.0755		0.442083	18.9633	27.3236
0.4425	29.3611	31.3396	10.3718		0.4425	19.0495	27.4367
0.442917	29.5193	31.4173	10.398		0.442917	18.971	27.4429
0.443333	29.4335	31.5041	10.1785		0.443333	18.9982	27.2898
0.44375	29.628	31.4921	9.75305		0.44375	19.0988	27.3403
0.444167	29.7977	31.4077	10.912		0.444167	19.0383	27.5941
0.444583	29.4868	31.5058	10.7302		0.444583	19.0338	27.6752
0.445	29.308	31.574	11.1389		0.445	19.0274	27.3847
0.445417	29.3795	31.5781	10.8789		0.445417	19.0601	27.4994
0.445833	29.4608	31.5391	10.9248		0.445833	19.1548	27.8455
0.44625	29.4385	31.708	11.1476		0.44625	19.0909	27.7158
0.446667	29.4263	31.538	10.6351		0.446667	19.1604	27.6032
0.447083	29.6381	31.6077	9.18036		0.447083	19.1684	27.7281
0.4475	29.6877	31.6208	9.10793		0.4475	19.1119	27.5802
0.447917	29.6666	31.5475	9.57545		0.447917	19.1135	27.6696
0.448333	29.7073	31.6981	10.4337		0.448333	19.1883	27.6204
0.44875	29.6958	31.5983	13.5124		0.44875	19.0868	27.6808
0.449167	30.114	31.697	15.1331		0.449167	19.2271	27.4063
0.449583	29.9836	31.7678	14.392		0.449583	19.1478	27.5807
0.45	29.8187	31.726	13.8447		0.45	19.1329	27.656
0.450417	29.8243	31.8639	13.5239		0.450417	19.2221	27.9917
0.450833	29.7434	31.6487	13.2413		0.450833	19.1042	27.8482
0.45125	29.838	31.8724	13.1568		0.45125	19.1425	27.8974
0.451667	29.736	31.8805	12.9992		0.451667	19.2597	27.8863
0.452083	29.9158	31.7153	12.8943		0.452083	19.1734	28.0017
0.4525	29.8	31.8881	12.7864		0.4525	19.2802	28.2278
0.452917	29.9929	32.0234	12.6977		0.452917	19.3409	28.2681
0.453333	29.983	31.872	12.775		0.453333	19.2156	28.4138
0.45375	29.9045	31.9067	12.7983		0.45375	19.341	27.9562
0.454167	30.177	32.0584	12.9425		0.454167	19.2807	27.676
0.454583	30.2308	32.0282	12.1539		0.454583	19.2188	27.9221
0.455	30.101	32.0697	10.9741		0.455	19.3725	28.0996
0.455417	29.8761	32.1067	11.6664		0.455417	19.2519	28.0209
0.455833	30.0695	32.0531	11.8072		0.455833	19.3027	27.9478
0.45625	30.0766	32.0791	12.0471		0.45625	19.3054	27.9182
0.456667	30.344	31.8601	12.2404		0.456667	19.3126	28.006
0.457083	30.4191	32.0687	12.2486		0.457083	19.3516	27.7848
0.4575	30.4468	32.1611	12.4251		0.4575	19.3541	27.9044
0.457917	30.4861	32.2324	12.2839		0.457917	19.2963	28.0675
0.458333	30.4334	32.2183	12.3349		0.458333	19.4897	28.2168
0.45875	30.4256	32.3207	12.6954		0.45875	19.3546	28.1147
0.459167	30.5573	32.4729	12.8814		0.459167	19.4823	28.0828
0.459583	30.5931	32.3102	12.7413		0.459583	19.444	28.0188
0.46	30.4943	32.3118	12.6739		0.46	19.4399	28.6907
0.460417	30.5139	32.3407	12.6504		0.460417	19.4647	28.3184
0.460833	30.4891	32.2927	12.6496		0.460833	19.3779	28.1585
0.46125	30.6328	32.4014	13.1711		0.46125	19.4901	28.1815
0.461667	30.5909	32.5136	13.1944		0.461667	19.4344	28.115
0.462083	30.4259	32.4265	12.6369		0.462083	19.3418	28.1529
0.4625	30.6786	32.4576	12.6456		0.4625	19.5449	28.43
0.462917	30.6539	32.4998	13.0196		0.462917	19.4916	28.5153
0.463333	30.5425	32.5021	13.1194		0.463333	19.5351	28.3654
0.46375	30.567	32.616	13.0056		0.46375	19.6097	28.1551
0.464167	30.7083	32.6781	12.8048		0.464167	19.5744	28.2535
0.464583	30.712	32.5218	12.7772		0.464583	19.649	28.2154
0.465	30.6587	32.4955	12.818		0.465	19.4917	28.1831
0.465417	30.6	32.5859	12.7186		0.465417	19.611	28.2126
0.465833	30.7401	32.7767	12.4524		0.465833	19.5591	28.2827
0.46625	30.9332	32.7155	12.5477		0.46625	19.5714	28.2871
0.466667	31.0291	32.5395	12.5		0.466667	19.6549	28.1511
0.467083	30.6869	32.7962	12.7197		0.467083	19.6086	28.4989
0.4675	31.1051	32.7715	12.6434		0.4675	19.5755	28.3512
0.467917	30.9064	32.771	12.6745		0.467917	19.5635	28.3335
0.468333	30.9754	32.8014	12.6314		0.468333	19.6293	28.2856
0.46875	31.0559	32.7815	12.5791		0.46875	19.7317	28.4842
0.469167	30.9838	32.8852	12.9233		0.469167	19.658	28.4244
0.469583	30.9339	32.8892	13.2507		0.469583	19.6696	28.3152
0.47	31.0325	32.9273	13.2655		0.47	19.7327	28.263
0.470417	31.0854	32.9136	13.1689		0.470417	19.733	28.457
0.470833	31.112	33.087	12.9552		0.470833	19.6788	28.3247
0.47125	31.4193	32.8645	12.9125		0.47125	19.7316	28.3539
0.471667	31.4039	32.8836	12.8245		0.471667	19.7733	28.3502
0.472083	31.3853	33.077	13.1327		0.472083	19.7281	28.4718
0.4725	31.3164	33.1381	13.0789		0.4725	19.7116	28.5369
0.472917	31.2618	33.0568	13.1499		0.472917	19.7725	28.4872
0.473333	31.2949	33.0752	12.943		0.473333	19.7053	28.6003
0.47375	31.1792	33.2351	13.0143		0.47375	19.8785	28.4611
0.474167	31.2554	32.9712	13.2403		0.474167	19.7774	28.4903
0.474583	31.2693	33.1556	13.2169		0.474583	19.7572	28.5766
0.475	31.3238	33.2647	13.1785		0.475	19.7701	28.3733
0.475417	31.4018	33.2173	13.2143		0.475417	19.7878	28.6369
0.475833	31.4358	33.1941	13.2853		0.475833	19.8585	28.6874
0.47625	31.4053	33.3661	13.3023		0.47625	19.8207	28.8114
0.476667	31.5665	33.4639	13.2252		0.476667	19.9035	28.929
0.477083	31.4107	33.2937	13.202		0.477083	19.9503	28.8049
0.4775	31.606	33.5898	13.2723		0.4775	19.8407	28.7666
0.477917	31.6993	33.664	13.1237		0.477917	19.9541	28.9719
0.478333	31.7524	33.62	12.9426		0.478333	19.9318	28.881
0.47875	31.5977	33.5741	12.9602		0.47875	19.9515	28.8993
0.479167	31.8447	33.5238	13.0491		0.479167	19.9849	28.9927
0.479583	31.6853	33.7213	13.3193		0.479583	19.9752	29.1626
0.48	31.6988	33.6176	13.5036		0.48	19.874	28.9504
0.480417	31.7397	33.5911	13.4409		0.480417	20.0935	28.9922
0.480833	31.5865	33.7048	13.4623		0.480833	19.9446	28.9027
0.48125	31.836	33.6967	13.4177		0.48125	20.065	28.8384
0.481667	31.5125	33.7307	13.2936		0.481667	19.9254	28.8784
0.482083	31.5871	33.7763	13.3381		0.482083	20.0029	28.6888
0.4825	31.7676	33.7079	13.2546		0.4825	20.1112	28.8342
0.482917	31.7275	33.5976	13.347		0.482917	20.0421	28.924
0.483333	31.6782	33.8662	13.3166		0.483333	20.0849	29.0402
0.48375	31.7365	33.774	13.3389		0.48375	20.0592	29.0192
0.484167	31.8189	33.7694	12.773		0.484167	20.0208	29.0694
0.484583	31.8904	33.7809	12.6995		0.484583	20.1739	28.9092
0.485	31.7677	33.7517	12.82		0.485	20.0914	28.9858
0.485417	32.02	33.8687	12.9551		0.485417	20.1066	28.8628
0.485833	32.1527	34.0033	12.9715		0.485833	20.1901	29.0323
0.48625	32.3045	33.7602	12.8777		0.48625	20.1408	28.9092
0.486667	32.124	33.7864	12.9029		0.486667	20.2289	29.0502
0.487083	32.2421	33.8336	13.0067		0.487083	20.1253	29.0552
0.4875	32.1789	34.0394	13.0236		0.4875	20.2191	29.1122
0.487917	32.2835	34.0151	13.1749		0.487917	20.2408	29.1526
0.488333	32.445	34.0226	13.2656		0.488333	20.127	29.1575
0.48875	32.4135	34.0233	13.2279		0.48875	20.2213	29.3909
0.489167	32.3085	34.0648	12.9393		0.489167	20.2357	29.3344
0.489583	32.2564	34.2373	12.9639		0.489583	20.2328	29.0276
0.49	32.2726	34.2403	12.824		0.49	20.3015	29.1178
0.490417	32.4069	34.0163	12.8124		0.490417	20.1894	28.9868
0.490833	32.2298	34.1252	12.8936		0.490833	20.3226	29.3307
0.49125	32.2721	34.3853	12.8453		0.49125	20.1739	29.5607
0.491667	32.0879	34.3513	12.8868		0.491667	20.2776	29.5489
0.492083	32.3057	34.3959	12.9933		0.492083	20.3272	29.1762
0.4925	32.3007	34.529	13.0182		0.4925	20.3175	29.103
0.492917	32.3015	34.4149	13.2414		0.492917	20.3972	29.251
0.493333	32.3578	34.4575	13.0975		0.493333	20.3503	29.1509
0.49375	32.4738	34.4605	13.1417		0.49375	20.4011	29.4044
0.494167	32.4105	34.5794	13.1511		0.494167	20.4471	29.3466
0.494583	32.4783	34.3204	13.0765		0.494583	20.3065	29.5585
0.495	32.5381	34.3765	13.1042		0.495	20.4507	29.4376
0.495417	32.8574	34.6032	13.1878		0.495417	20.4228	29.3831
0.495833	32.7995	34.5643	13.1854		0.495833	20.4487	29.4423
0.49625	32.7922	34.5887	13.1006		0.49625	20.3333	29.621
0.496667	32.8295	34.5873	12.8924		0.496667	20.4718	29.5641
0.497083	32.6311	34.5532	12.9007		0.497083	20.5602	29.7601
0.4975	32.8671	34.7571	12.8475		0.4975	20.454	29.5026
0.497917	32.8541	34.7981	12.8757		0.497917	20.5482	29.3819
0.498333	32.8302	34.8081	12.9262		0.498333	20.5369	29.7491
0.49875	32.8163	34.6046	12.904		0.49875	20.3794	29.8599
0.499167	32.932	34.5306	13.0279		0.499167	20.5741	29.6832
0.499583	32.827	35.0011	13.1972		0.499583	20.4919	29.6572
0.5	32.8017	34.8463	13.2139		0.5	20.5467	29.7228
0.500417	32.874	34.9068	13.0281		0.500417	20.5117	29.8077
0.500833	32.9933	34.8652	12.8366		0.500833	20.5342	29.6993
0.50125	33.1455	34.9269	12.925		0.50125	20.706	29.6999
0.501667	33.1626	34.9329	12.6957		0.501667	20.5762	29.7779
0.502083	33.1536	35.0003	12.7837		0.502083	20.6277	29.6428
0.5025	32.9425	34.9943	12.6023		0.5025	20.6436	29.7758
0.502917	33.0568	35.0901	12.5269		0.502917	20.699	30.0994
0.503333	33.2072	35.1079	12.7897		0.503333	20.7406	29.9738
0.50375	33.3833	35.3254	12.8392		0.50375	20.6214	30.0944
0.504167	33.0038	35.2327	12.9933		0.504167	20.6215	29.8103
0.504583	33.2696	35.2011	12.9918		0.504583	20.7566	29.8133
0.505	33.4267	35.2115	12.8968		0.505	20.6836	30.0366
0.505417	33.2354	35.3237	12.9379		0.505417	20.7505	29.8175
0.505833	33.2631	35.2333	13.132		0.505833	20.7194	29.7427
0.50625	33.3222	35.193	13.0717		0.50625	20.6538	29.7816
0.506667	33.5272	35.0843	12.7604		0.506667	20.7722	30.0761
0.507083	33.4656	35.2454	12.9095		0.507083	20.7731	29.9935
0.5075	33.6246	35.4155	13.161		0.5075	20.8094	29.812
0.507917	33.5175	35.578	12.9822		0.507917	20.7617	29.9252
0.508333	33.3696	35.3813	12.8457		0.508333	20.752	30.0176
0.50875	33.6411	35.5206	13.0514		0.50875	20.8519	30.1364
0.509167	33.7324	35.4061	13.1001		0.509167	20.8219	30.0322
0.509583	33.8691	35.4221	13.0129		0.509583	20.7819	30.1198
0.51	33.5845	35.4243	13.0872		0.51	20.9246	30.0859
0.510417	33.3973	35.4715	12.9798		0.510417	20.9066	30.0734
0.510833	33.6056	35.6326	13.0249		0.510833	20.884	30.0041
0.51125	33.5489	35.5931	12.9538		0.51125	20.937	30.1246
0.511667	33.8349	35.4419	12.9923		0.511667	20.8766	30.1082
0.512083	33.7912	35.6556	12.9762		0.512083	21.0275	30.1344
0.5125	33.6725	35.6317	12.9551		0.5125	20.9463	30.1603
0.512917	33.797	35.6282	12.9136		0.512917	20.9175	30.3469
0.513333	33.9521	35.8003	13.1144		0.513333	21.0759	30.2721
0.51375	33.6432	35.6332	13.1003		0.51375	20.9306	30.0946
0.514167	33.8627	35.6492	13.0787		0.514167	20.959	30.3657
0.514583	33.829	35.8166	13.2306		0.514583	21.0845	30.3475
0.515	33.8793	35.9041	13.1238		0.515	20.9334	30.1635
0.515417	33.9132	35.8684	13.112		0.515417	21.0492	30.3812
0.515833	33.8784	35.8842	13.0473		0.515833	21.0758	30.3116
0.51625	33.926	36.0388	13.0106		0.51625	21.0563	30.5636
0.516667	34.1249	36.0611	12.8508		0.516667	21.1045	30.2149
0.517083	34.0424	35.9392	12.8987		0.517083	21.0116	30.449
0.5175	34.1558	36.0723	12.8619		0.5175	21.1556	30.8583
0.517917	34.0886	36.1115	13.0343		0.517917	21.221	30.4012
0.518333	34.2247	36.2984	13.0976		0.518333	21.0726	30.2086
0.51875	34.267	36.2	13.0146		0.51875	21.2564	30.5507
0.519167	34.1177	36.2161	12.9302		0.519167	21.0998	30.7661
0.519583	34.3558	36.2775	12.9766		0.519583	21.1706	30.5527
0.52	34.4248	36.2887	12.9175		0.52	21.2655	30.345
0.520417	34.2721	36.0719	13.0424		0.520417	21.2058	30.3086
0.520833	34.1667	36.0928	13.0093		0.520833	21.2726	30.5594
0.52125	34.0673	36.3567	13.0752		0.52125	21.264	30.5591
0.521667	34.0455	36.4621	13.2092		0.521667	21.2876	30.5468
0.522083	34.3425	36.4744	13.2498		0.522083	21.3154	30.5586
0.5225	34.3659	36.6571	13.2062		0.5225	21.2845	30.52
0.522917	34.3779	36.5538	13.1389		0.522917	21.3906	30.6579
0.523333	34.2261	36.4826	13.3314		0.523333	21.3217	30.6892
0.52375	34.5546	36.3924	13.403		0.52375	21.3403	30.551
0.524167	34.6105	36.7157	13.3798		0.524167	21.3748	30.6468
0.524583	34.4637	36.6045	13.2014		0.524583	21.2843	30.8126
0.525	34.2831	36.5993	12.9886		0.525	21.4131	30.4562
0.525417	34.4566	36.4781	13.2109		0.525417	21.4135	30.4041
0.525833	34.6896	36.6539	13.1796		0.525833	21.3797	30.6235
0.52625	34.536	36.822	13.1646		0.52625	21.4151	30.802
0.526667	34.5052	36.5978	13.1712		0.526667	21.3736	30.7257
0.527083	34.7097	36.7424	13.205		0.527083	21.3797	30.7829
0.5275	34.4032	36.7565	13.0732		0.5275	21.49	30.8021
0.527917	34.4431	36.7533	13.0098		0.527917	21.4485	30.7251
0.528333	34.5735	36.8211	13.0038		0.528333	21.5351	30.9094
0.52875	34.5738	36.8775	12.919		0.52875	21.5068	30.8952
0.529167	34.7135	36.8101	13.0001		0.529167	21.4942	30.8126
0.529583	34.8762	36.832	13.0503		0.529583	21.606	30.7509
0.53	34.9079	36.8367	13.1557		0.53	21.5729	31.0148
0.530417	34.9102	36.9649	13.1295		0.530417	21.6037	30.8406
0.530833	34.9634	37.0241	13.1527		0.530833	21.5776	30.7768
0.53125	35.0021	36.8609	13.0233		0.53125	21.585	31.018
0.531667	34.8944	36.9796	12.9276		0.531667	21.6743	31.0639
0.532083	35.0202	37.0564	12.9614		0.532083	21.6699	31.0977
0.5325	35.1977	37.0713	13.072		0.5325	21.6886	30.9554
0.532917	34.9207	37.231	13.31		0.532917	21.6733	30.9263
0.533333	35.0591	37.2216	13.1524		0.533333	21.6608	31.0292
0.53375	35.0887	37.19	13.1245		0.53375	21.8041	30.9279
0.534167	35.0574	37.3008	13.1435		0.534167	21.722	31.0365
0.534583	35.0586	37.3069	13.2358		0.534583	21.7714	31.0245
0.535	35.1534	37.1624	13.2054		0.535	21.7228	31.1106
0.535417	35.0984	37.0725	13.2079		0.535417	21.7641	31.1179
0.535833	35.2238	37.1705	12.9256		0.535833	21.7566	31.2983
0.53625	35.2288	37.1576	12.9855		0.53625	21.747	31.221
0.536667	35.1517	37.1521	13.3077		0.536667	21.8755	31.2591
0.537083	35.374	37.3878	16.0692		0.537083	21.8989	31.1273
0.5375	35.2075	37.2316	16.2982		0.5375	21.9016	31.1697
0.537917	35.2628	37.3344	15.6531		0.537917	21.9108	31.3199
0.538333	35.366	37.4491	15.6048		0.538333	21.8171	31.1291
0.53875	35.2713	37.507	15.4828		0.53875	21.9815	31.2737
0.539167	35.321	37.5769	15.2558		0.539167	21.8223	31.3288
0.539583	35.5347	37.4203	15.3898		0.539583	21.9725	31.2277
0.54	35.4045	37.5956	15.552		0.54	21.9637	31.2175
0.540417	35.6432	37.487	15.3623		0.540417	21.9502	31.1511
0.540833	35.7138	37.4776	15.2495		0.540833	22.0567	31.2235
0.54125	35.6176	37.4512	15.3096		0.54125	21.933	31.3462
0.541667	35.5943	37.5181	15.3672		0.541667	22.0675	31.3697
0.542083	35.7601	37.5981	15.4049		0.542083	22.033	31.2375
0.5425	35.6794	37.4725	15.5045		0.5425	21.981	31.1791
0.542917	35.7139	37.6251	15.6639		0.542917	22.1167	31.1816
0.543333	35.7632	37.6807	15.5772		0.543333	21.9668	31.3912
0.54375	35.9023	37.8527	15.3807		0.54375	22.0635	31.2778
0.544167	35.667	37.9833	15.1097		0.544167	22.1533	31.5976
0.544583	35.8257	37.8297	14.3983		0.544583	22.0723	31.5672
0.545	35.8632	37.8177	15.9994		0.545	22.1518	31.5391
0.545417	35.9102	37.8548	16.564		0.545417	22.0925	31.6619
0.545833	36.094	37.9595	16.1248		0.545833	22.182	31.7153
0.54625	36.0461	37.9328	15.9703		0.54625	22.1643	31.5154
0.546667	36.1554	37.9057	15.8847		0.546667	22.1797	31.5308
0.547083	36.1329	38.01	15.915		0.547083	22.2671	31.3133
0.5475	36.1878	38.054	15.984		0.5475	22.1371	31.6042
0.547917	36.1469	37.87	16.0202		0.547917	22.2032	31.6512
0.548333	35.9561	37.8906	15.9887		0.548333	22.3104	31.8333
0.54875	36.0538	37.903	15.8972		0.54875	22.2136	31.7385
0.549167	36.1163	38.0477	15.889		0.549167	22.2217	31.7718
0.549583	36.0371	37.9954	15.9878		0.549583	22.2062	31.7799
0.55	36.2138	38.0688	16.1086		0.55	22.3266	31.5941
0.550417	36.2506	38.0108	16.1073		0.550417	22.3918	31.799
0.550833	36.3641	38.0955	15.9716		0.550833	22.2948	31.8813
0.55125	36.2927	38.2395	16.0206		0.55125	22.4524	31.795
0.551667	36.3428	38.2248	16.0983		0.551667	22.4079	31.5401
0.552083	36.1239	38.3327	16.1274		0.552083	22.2982	31.7396
0.5525	36.3087	38.5145	16.1342		0.5525	22.4041	31.8332
0.552917	36.6278	38.3108	16.1434		0.552917	22.4034	32.0062
0.553333	36.5775	38.3706	16.1202		0.553333	22.5403	31.6626
0.55375	36.5338	38.4145	16.1942		0.55375	22.4914	31.6754
0.554167	36.5669	38.5029	16.1596		0.554167	22.5095	31.8553
0.554583	36.5963	38.475	16.1435		0.554583	22.5943	32.0149
0.555	36.6684	38.4893	16.0825		0.555	22.4842	31.9272
0.555417	36.5862	38.5084	16.0841		0.555417	22.5251	32.2326
0.555833	36.45	38.5101	15.9904		0.555833	22.5537	31.9716
0.55625	36.5674	38.5346	16.0812		0.55625	22.5229	31.8236
0.556667	36.5909	38.6489	15.9117		0.556667	22.5814	31.9501
0.557083	36.8401	38.6497	16.018		0.557083	22.6328	32.0065
0.5575	36.7067	38.6054	16.036		0.5575	22.5937	31.9539
0.557917	36.5108	38.5767	15.9827		0.557917	22.6515	31.9607
0.558333	36.7686	38.6508	16.0347		0.558333	22.629	32.0773
0.55875	36.8586	38.8657	15.986		0.55875	22.7295	32.0676
0.559167	36.7906	38.8693	15.9382		0.559167	22.7165	32.0698
0.559583	36.7787	38.9648	16.0023		0.559583	22.7411	32.1237
0.56	36.6394	38.6652	16.1247		0.56	22.7357	32.099
0.560417	36.7699	38.7694	16.147		0.560417	22.6802	32.0632
0.560833	36.7343	38.8553	16.1531		0.560833	22.7689	32.1681
0.56125	37.0216	38.9561	16.1319		0.56125	22.7576	32.1454
0.561667	37.0126	39.0665	16.0744		0.561667	22.8491	32.1932
0.562083	36.9507	38.9556	16.1466		0.562083	22.7697	32.2207
0.5625	37.5267	39.1845	16.137		0.5625	22.8254	32.1365
0.562917	37.2317	39.0606	16.1064		0.562917	22.8861	32.2504
0.563333	37.276	39.2051	16.1036		0.563333	22.7925	32.0893
0.56375	37.1028	39.2484	16.072		0.56375	22.8841	32.2424
0.564167	37.0175	39.2916	16.1953		0.564167	22.9011	32.511
0.564583	37.1776	39.3913	16.1218		0.564583	22.8447	32.1811
0.565	37.1799	39.1033	16.1085		0.565	22.9441	32.2945
0.565417	37.1668	39.2955	16.1383		0.565417	22.8902	32.2569
0.565833	37.1937	39.1179	16.0315		0.565833	23.0131	32.1657
0.56625	37.3234	39.1446	15.9565		0.56625	22.9963	32.6007
0.566667	37.1492	39.2631	16.1016		0.566667	23.051	32.3554
0.567083	37.2975	39.2767	16.1881		0.567083	22.9849	32.3209
0.5675	37.5047	39.2609	15.9956		0.5675	22.9779	32.5886
0.567917	37.4483	39.2318	15.9618		0.567917	23.0677	32.4793
0.568333	37.4191	39.4898	16.0274		0.568333	23.0463	32.3195
0.56875	37.4206	39.385	15.8439		0.56875	23.107	32.452
0.569167	37.5217	39.5412	15.8589		0.569167	23.0948	32.7265
0.569583	37.396	39.5802	15.9174		0.569583	23.129	32.7371
0.57	37.5979	39.5357	16.1614		0.57	23.1975	32.3824
0.570417	37.7598	39.6083	16.2456		0.570417	23.0585	32.4794
0.570833	37.8216	39.632	16.1566		0.570833	23.1601	32.68
0.57125	37.7755	39.7174	16.2581		0.57125	23.1963	32.3249
0.571667	37.5569	39.6467	16.2715		0.571667	23.1721	32.3696
0.572083	37.4605	39.7721	16.1728		0.572083	23.2281	32.4906
0.5725	37.6439	39.7616	16.1344		0.5725	23.2256	32.3924
0.572917	37.7034	39.8065	16.1251		0.572917	23.2788	32.6331
0.573333	38.0439	39.7595	16.0883		0.573333	23.2965	32.4302
0.57375	37.9843	39.7189	16.09		0.57375	23.2482	32.636
0.574167	38.2224	39.9673	16.2011		0.574167	23.3222	32.721
0.574583	38.095	39.915	16.1462		0.574583	23.3166	32.4524
0.575	38.1103	40.0866	16.0423		0.575	23.3535	32.6412
0.575417	38.0383	40.0429	16.0959		0.575417	23.3855	32.7519
0.575833	38.1558	40.1776	16.17		0.575833	23.373	32.8887
0.57625	38.1739	39.9443	16.1654		0.57625	23.4695	32.7349
0.576667	38.2113	40.1752	16.1259		0.576667	23.4497	32.7976
0.577083	38.1752	40.1954	16.1075		0.577083	23.5011	32.7714
0.5775	38.1025	40.244	16.1811		0.5775	23.4744	32.7146
0.577917	38.1362	40.1822	16.1751		0.577917	23.5255	32.7466
0.578333	38.4803	40.2136	16.2101		0.578333	23.5677	32.9834
0.57875	38.3343	40.2781	16.2527		0.57875	23.5367	32.8342
0.579167	38.3769	40.4126	16.2858		0.579167	23.5145	32.9691
0.579583	38.1613	40.5773	16.2808		0.579583	23.624	32.7335
0.58	38.3071	40.4293	16.1938		0.58	23.5366	32.925
0.580417	38.3848	40.3668	16.1035		0.580417	23.605	33.0239
0.580833	38.4847	40.4297	16.1025		0.580833	23.6275	33.1302
0.58125	38.5728	40.5349	16.0418		0.58125	23.557	33.0393
0.581667	38.4834	40.6798	16.0422		0.581667	23.7239	33.1297
0.582083	38.3727	40.6546	16.0004		0.582083	23.6838	33.2128
0.5825	38.3115	40.6978	16.0527		0.5825	23.7215	33.2467
0.582917	38.6171	40.6947	16.1236		0.582917	23.707	33.1491
0.583333	38.6373	40.7866	16.0755		0.583333	23.6489	33.0279
0.58375	38.7284	40.7992	15.8668		0.58375	23.8448	33.1831
0.584167	38.6384	40.7571	15.9645		0.584167	23.7438	33.1763
0.584583	38.8627	40.8195	15.9407		0.584583	23.7825	33.1543
0.585	38.7012	40.8312	15.7089		0.585	23.8037	33.1767
0.585417	38.7412	40.9236	15.7464		0.585417	23.8051	33.0973
0.585833	38.7319	40.8404	15.7894		0.585833	23.9005	33.2693
0.58625	38.8564	40.7509	15.8882		0.58625	23.8507	33.1253
0.586667	39.0793	40.7844	15.9737		0.586667	23.858	33.2343
0.587083	38.9392	41.0487	16.0109		0.587083	23.9622	33.3103
0.5875	39.1634	40.8763	15.9909		0.5875	23.8954	33.3468
0.587917	39.2572	41.1793	15.9404		0.587917	23.958	33.201
0.588333	39.1382	41.1598	15.9268		0.588333	23.9873	33.2169
0.58875	39.0867	41.0733	16.0341		0.58875	24.0508	33.3219
0.589167	39.1829	41.0854	16.2284		0.589167	24.0923	33.3931
0.589583	39.0821	41.1907	16.2868		0.589583	24.0231	33.2679
0.59	39.1429	41.0556	16.5102		0.59	24.1268	33.1268
0.590417	39.1853	41.151	16.6389		0.590417	24.0999	33.4534
0.590833	39.2778	41.397	16.5164		0.590833	24.0701	33.4185
0.59125	39.4378	41.2351	16.5321		0.59125	24.1549	33.6848
0.591667	39.4787	41.415	16.5132		0.591667	24.1412	33.537
0.592083	39.3885	41.6286	16.4871		0.592083	24.172	33.4386
0.5925	39.3099	41.5542	16.4823		0.5925	24.1987	33.2878
0.592917	39.305	41.3887	16.4561		0.592917	24.1761	33.3554
0.593333	39.5274	41.681	16.4263		0.593333	24.2934	33.4206
0.59375	39.5035	41.556	16.3736		0.59375	24.2018	33.3815
0.594167	39.4768	41.6953	16.3267		0.594167	24.3087	33.4734
0.594583	39.5427	41.7545	16.3677		0.594583	24.2673	33.6904
0.595	39.5745	41.6543	16.4207		0.595	24.2661	33.5292
0.595417	39.5456	41.6708	16.413		0.595417	24.3484	33.7233
0.595833	39.7934	41.6456	16.4335		0.595833	24.2887	33.7644
0.59625	39.8193	41.8896	16.4369		0.59625	24.4344	33.5158
0.596667	39.9415	41.8686	16.4247		0.596667	24.3939	33.6022
0.597083	39.6899	41.7006	16.3611		0.597083	24.4105	33.7607
0.5975	39.7227	41.6927	16.3297		0.5975	24.4178	33.8985
0.597917	39.8628	41.7386	16.4967		0.597917	24.3951	33.6364
0.598333	39.7293	41.8673	16.5726		0.598333	24.4515	33.7528
0.59875	39.8919	41.8057	16.5549		0.59875	24.4798	33.7774
0.599167	39.8914	41.9364	16.5252		0.599167	24.4293	33.718
0.599583	40.1407	42.0469	16.4787		0.599583	24.5414	33.7814
0.6	40.2306	42.0714	16.5165		0.6	24.4936	33.7489
0.600417	39.8472	41.957	16.535		0.600417	24.5592	33.7984
0.600833	40.1069	41.9603	16.5168		0.600833	24.5882	33.7307
0.60125	40.0262	42.2386	16.682		0.60125	24.5666	33.8624
0.601667	40.2367	42.3468	16.6137		0.601667	24.6782	33.7598
0.602083	40.1909	42.1808	16.5446		0.602083	24.6018	33.8874
0.6025	40.3731	42.2976	16.6109		0.6025	24.7557	34.2587
0.602917	40.1521	42.1576	16.5999		0.602917	24.6854	34.0078
0.603333	40.2144	41.9185	16.6156		0.603333	24.6644	33.8568
0.60375	40.3148	42.1212	16.6108		0.60375	24.7755	33.9416
0.604167	40.2992	42.2698	16.5752		0.604167	24.7055	33.9274
0.604583	40.1621	42.0458	16.5836		0.604583	24.7369	34.156
0.605	40.6113	42.1549	16.5756		0.605	24.7937	34.2289
0.605417	40.5426	42.2633	16.6207		0.605417	24.8119	34.035
0.605833	40.5953	42.5822	16.6399		0.605833	24.8171	34.1881
0.60625	40.6444	42.5272	16.5804		0.60625	24.7864	34.0796
0.606667	40.5421	42.6435	16.5892		0.606667	24.936	34.1032
0.607083	40.5975	42.6551	16.6594		0.607083	24.929	34.1184
0.6075	40.6789	42.4291	16.6474		0.6075	24.9307	34.1668
0.607917	40.7494	42.5083	16.7246		0.607917	24.9706	34.0359
0.608333	40.7032	42.4711	16.7124		0.608333	24.8844	34.4747
0.60875	40.5039	42.4927	16.7327		0.60875	25.0199	34.027
0.609167	40.7461	42.7178	16.6945		0.609167	25.0111	34.2266
0.609583	40.8467	42.7752	16.697		0.609583	24.9543	34.2221
0.61	41.0254	42.5586	16.7119		0.61	25.0562	34.1774
0.610417	40.9427	42.6625	16.7533		0.610417	25.0197	34.1446
0.610833	40.9192	42.8047	16.7725		0.610833	25.1511	34.2139
0.61125	40.8701	42.9768	16.9212		0.61125	25.0853	34.3737
0.611667	41.0851	42.8851	17.0265		0.611667	25.1256	34.1654
0.612083	41.2361	42.9691	16.9369		0.612083	25.1548	34.3262
0.6125	41.1435	42.9919	16.8755		0.6125	25.1523	34.3313
0.612917	40.9993	43.0135	16.8417		0.612917	25.1974	34.2057
0.613333	41.2827	43.0128	16.8135		0.613333	25.159	34.1702
0.61375	41.3846	43.1094	16.843		0.61375	25.2064	34.4205
0.614167	41.3105	43.3227	16.806		0.614167	25.2391	34.4836
0.614583	41.1994	43.3651	16.7537		0.614583	25.2469	34.5945
0.615	41.1916	43.2296	16.7145		0.615	25.3676	34.4729
0.615417	41.2122	43.4291	16.7865		0.615417	25.2951	34.5652
0.615833	41.2801	43.3855	16.9248		0.615833	25.4067	34.4388
0.61625	41.3759	43.3224	16.7539		0.61625	25.3243	34.4942
0.616667	41.319	43.3377	16.7037		0.616667	25.3349	34.6057
0.617083	41.3401	43.3903	16.683		0.617083	25.3958	34.5257
0.6175	41.4814	43.4891	16.7669		0.6175	25.3432	34.6322
0.617917	41.5276	43.4395	16.8694		0.617917	25.4691	34.6865
0.618333	41.5342	43.6465	16.8507		0.618333	25.4736	34.7514
0.61875	41.4846	43.7011	16.8944		0.61875	25.501	34.71
0.619167	41.5242	43.4717	16.882		0.619167	25.611	34.6541
0.619583	41.377	43.6374	16.8777		0.619583	25.5644	34.6584
0.62	41.6313	43.7774	17.0116		0.62	25.5631	34.5029
0.620417	41.7179	43.6227	16.9978		0.620417	25.5638	34.6227
0.620833	41.7521	43.8744	16.9917		0.620833	25.5874	34.6771
0.62125	41.9299	43.7065	16.8702		0.62125	25.6594	34.6961
0.621667	42.003	43.7129	16.8899		0.621667	25.6088	35.0156
0.622083	42.1048	43.8725	17.0398		0.622083	25.691	35.1149
0.6225	42.3475	43.8414	16.9062		0.6225	25.633	35.162
0.622917	42.0382	44.0888	16.8931		0.622917	25.7342	35.0141
0.623333	42.0663	44.1101	16.8023		0.623333	25.6863	35.023
0.62375	42.0757	44.0541	16.9129		0.62375	25.7144	34.9172
0.624167	41.9986	43.8331	16.9465		0.624167	25.7934	34.8245
0.624583	42.1345	44.1814	16.9481		0.624583	25.7209	34.9035
0.625	42.2206	44.0777	17.01		0.625	25.8507	35.0033
0.625417	42.3774	44.3239	16.9549		0.625417	25.8609	34.9737
0.625833	42.2484	44.3863	16.8979		0.625833	25.8958	34.9634
0.62625	42.3196	44.152	16.9775		0.62625	25.9748	35.1515
0.626667	42.1869	44.1984	17.016		0.626667	25.8582	35.0425
0.627083	42.3158	44.12	17.0038		0.627083	25.9939	35.0888
0.6275	42.3115	44.4011	16.9472		0.6275	25.922	35.1094
0.627917	42.4006	44.4833	17.064		0.627917	25.9424	35.0723
0.628333	42.2858	44.2649	17.0853		0.628333	26.0175	34.9962
0.62875	42.4897	44.5685	17.0578		0.62875	25.9933	34.87
0.629167	42.7203	44.514	16.9903		0.629167	26.093	34.8054
0.629583	42.504	44.5506	16.9741		0.629583	26.115	35.0911
0.63	42.7282	44.5515	17.0278		0.63	26.0799	35.0261
0.630417	42.767	44.5897	17.0861		0.630417	26.1166	35.051
0.630833	42.8259	44.5303	17.0587		0.630833	26.1596	35.2497
0.63125	42.7433	44.8015	17.1098		0.63125	26.2326	35.1123
0.631667	42.8052	44.6011	17.0738		0.631667	26.1991	35.1758
0.632083	42.7057	44.6893	16.9921		0.632083	26.1381	35.2439
0.6325	42.7115	44.8128	16.9445		0.6325	26.2587	35.4491
0.632917	42.9766	44.8987	16.9811		0.632917	26.2334	35.257
0.633333	42.8707	44.8724	16.9951		0.633333	26.3671	35.1616
0.63375	42.9823	44.8949	17.0437		0.63375	26.3401	35.3351
0.634167	43.0859	45.0453	17.0689		0.634167	26.3716	35.6052
0.634583	43.0065	45.0657	17.0159		0.634583	26.3816	35.2817
0.635	42.9805	44.8688	17.0654		0.635	26.3761	35.2494
0.635417	43.1263	44.9471	17.1711		0.635417	26.4501	35.4028
0.635833	43.2519	45.0272	17.0483		0.635833	26.4084	35.3173
0.63625	43.1975	45.351	17.1748		0.63625	26.4404	35.4049
0.636667	43.5118	45.161	17.1726		0.636667	26.5022	35.4204
0.637083	43.2817	45.3155	17.0984		0.637083	26.4665	35.4183
0.6375	43.4701	45.1865	17.1269		0.6375	26.5476	35.3903
0.637917	43.6642	45.2808	17.211		0.637917	26.4696	35.4538
0.638333	43.4436	45.2708	17.1734		0.638333	26.5485	35.3682
0.63875	43.6242	45.4274	17.1865		0.63875	26.6115	35.3643
0.639167	43.5428	45.468	17.2685		0.639167	26.6743	35.6696
0.639583	43.5064	45.4773	17.2484		0.639583	26.6699	35.4845
0.64	43.7138	45.6243	17.2398		0.64	26.6204	35.4542
0.640417	43.7303	45.4955	17.3021		0.640417	26.738	35.6946
0.640833	43.7352	45.5636	17.369		0.640833	26.7109	35.6521
0.64125	43.7823	45.6914	17.2387		0.64125	26.7273	35.6243
0.641667	43.7619	45.7723	17.2048		0.641667	26.7567	35.7832
0.642083	43.8086	45.8024	17.3325		0.642083	26.7429	35.7106
0.6425	43.9375	45.774	17.2971		0.6425	26.8012	35.9296
0.642917	43.9843	45.6541	17.2837		0.642917	26.793	35.8362
0.643333	44.1698	45.773	17.2782		0.643333	26.8898	35.9068
0.64375	43.9538	45.7955	17.2543		0.64375	26.9	35.6726
0.644167	43.9197	45.7953	17.1862		0.644167	26.8942	35.6538
0.644583	44.0695	45.8825	17.2839		0.644583	26.9334	35.8596
0.645	44.3401	45.8188	17.2843		0.645	26.9252	35.9911
0.645417	44.1911	46.0151	17.3629		0.645417	27.0426	35.842
0.645833	44.1146	46.1014	17.38		0.645833	27.0442	35.71
0.64625	44.4051	45.9767	17.2743		0.64625	27.0455	35.7292
0.646667	44.4318	46.1485	17.3435		0.646667	27.0887	36.1444
0.647083	44.4551	46.1992	17.3006		0.647083	27.0377	35.7614
0.6475	44.3868	46.0844	17.3331		0.6475	27.1652	35.8313
0.647917	44.472	46.227	17.3477		0.647917	27.1303	35.9642
0.648333	44.5568	46.2314	17.3257		0.648333	27.1707	35.8972
0.64875	44.5862	46.2826	17.396		0.64875	27.1558	36.1222
0.649167	44.5261	46.2891	17.4765		0.649167	27.2306	36.1702
0.649583	44.3787	46.3471	17.5055		0.649583	27.2968	36.2187
0.65	44.5856	46.3991	17.3839		0.65	27.2202	36.1054
0.650417	44.6583	46.5469	17.3637		0.650417	27.3339	35.9088
0.650833	44.8317	46.5389	17.3938		0.650833	27.3541	35.9878
0.65125	44.7862	46.6938	17.3919		0.65125	27.358	36.1205
0.651667	44.9501	46.775	17.5542		0.651667	27.4579	36.155
0.652083	45.1	46.6583	17.4885		0.652083	27.4115	36.4453
0.6525	45.0056	46.8735	17.3938		0.6525	27.4155	36.2476
0.652917	45.1343	46.7866	17.3874		0.652917	27.4468	36.3109
0.653333	45.0896	46.7943	17.4632		0.653333	27.4663	36.3703
0.65375	44.9964	46.9024	17.378		0.65375	27.5235	36.1974
0.654167	45.1569	46.9629	17.4448		0.654167	27.4551	36.2281
0.654583	45.3793	46.9267	17.4981		0.654583	27.55	36.4283
0.655	45.5237	46.8667	17.4406		0.655	27.6234	36.3297
0.655417	45.4441	46.9359	17.4512		0.655417	27.569	36.3801
0.655833	45.5284	47.0737	17.3944		0.655833	27.6553	36.3544
0.65625	45.5851	47.1595	17.4881		0.65625	27.6147	36.3058
0.656667	45.5525	47.211	17.5273		0.656667	27.6308	36.3839
0.657083	45.4162	47.3741	17.568		0.657083	27.7386	36.2939
0.6575	45.6211	47.2224	17.5032		0.6575	27.6897	36.4132
0.657917	45.6306	47.4181	17.537		0.657917	27.8099	36.5006
0.658333	45.6053	47.3662	17.5254		0.658333	27.7932	36.4638
0.65875	45.7423	47.277	17.4875		0.65875	27.8302	36.5142
0.659167	45.7214	47.3644	17.533		0.659167	27.818	36.5789
0.659583	45.6946	47.4189	17.4978		0.659583	27.8362	36.6186
0.66	45.6731	47.5153	17.4388		0.66	27.9321	36.6022
0.660417	45.845	47.4308	17.5482		0.660417	27.8684	36.6968
0.660833	46.0242	47.7662	17.5514		0.660833	27.877	36.6978
0.66125	45.9308	47.7573	17.4974		0.66125	28.012	36.4725
0.661667	45.9596	47.4773	17.561		0.661667	27.9025	36.3945
0.662083	46.0052	47.708	17.5963		0.662083	27.9895	36.5656
0.6625	46.0148	47.8867	17.6404		0.6625	28.0435	36.6189
0.662917	46.2073	47.9546	17.6049		0.662917	28.124	36.563
0.663333	46.0954	47.9485	17.6212		0.663333	28.1394	36.689
0.66375	46.1646	47.924	17.6789		0.66375	28.1012	36.6881
0.664167	46.2992	47.8361	17.6241		0.664167	28.163	36.738
0.664583	46.6076	47.9669	17.651		0.664583	28.1421	36.9735
0.665	46.4908	48.0653	17.6329		0.665	28.2078	36.6468
0.665417	46.4207	48.1102	17.6085		0.665417	28.252	36.5759
0.665833	46.7228	48.2963	17.578		0.665833	28.2336	36.6837
0.66625	46.666	48.3642	17.6825		0.66625	28.3006	36.7446
0.666667	46.6224	48.229	17.6297		0.666667	28.2721	36.7654
0.667083	46.6044	48.3127	17.6766		0.667083	28.2202	36.7395
0.6675	46.8507	48.4734	17.6443		0.6675	28.3821	36.9404
0.667917	46.8083	48.5011	17.6518		0.667917	28.3829	37.0501
0.668333	46.658	48.5625	17.6749		0.668333	28.4593	36.8995
0.66875	46.5962	48.3539	17.7961		0.66875	28.3771	36.8691
0.669167	46.807	48.7521	17.8622		0.669167	28.4359	36.9575
0.669583	47.0267	48.78	17.8615		0.669583	28.5092	37.0053
0.67	46.9738	48.5885	17.7732		0.67	28.4803	37.0143
0.670417	47.0151	48.7916	17.8679		0.670417	28.5435	37.0102
0.670833	47.0377	48.674	17.9242		0.670833	28.5072	37.1902
0.67125	47.2088	48.7285	17.9164		0.67125	28.5669	37.0621
0.671667	47.1024	48.889	17.9644		0.671667	28.6577	36.8955
0.672083	47.194	48.9482	17.9345		0.672083	28.5466	36.961
0.6725	47.3121	48.9201	17.9881		0.6725	28.6324	36.9962
0.672917	47.2825	49.0331	17.9349		0.672917	28.6869	37.1341
0.673333	47.3337	49.0791	17.8193		0.673333	28.7693	37.1719
0.67375	47.2449	49.1052	17.8498		0.67375	28.7842	37.2404
0.674167	47.3535	48.9178	17.8825		0.674167	28.7499	37.1357
0.674583	47.4783	49.0595	17.8836		0.674583	28.8518	37.1208
0.675	47.4882	49.0538	17.8788		0.675	28.8141	37.1925
0.675417	47.4827	49.254	17.8254		0.675417	28.8922	37.3701
0.675833	47.7664	49.3564	17.9522		0.675833	28.8991	37.3172
0.67625	47.8417	49.253	18.0384		0.67625	28.9215	37.1924
0.676667	47.5878	49.3653	18.0631		0.676667	29.0081	37.3249
0.677083	47.7694	49.2013	17.9937		0.677083	28.9349	37.1342
0.6775	47.918	49.3445	17.9581		0.6775	28.9907	37.2385
0.677917	48.1143	49.5112	17.9014		0.677917	29.0173	37.2693
0.678333	47.9859	49.5678	17.9118		0.678333	29.053	37.4666
0.67875	48.083	49.5175	18.0038		0.67875	29.126	37.407
0.679167	48.3395	49.6973	17.9916		0.679167	29.0237	37.4617
0.679583	48.4695	49.6699	18.024		0.679583	29.1791	37.4822
0.68	48.2539	49.9774	18.0553		0.68	29.1263	37.5722
0.680417	48.2087	49.9999	18.0218		0.680417	29.1759	37.8423
0.680833	48.1911	50.0082	18.0517		0.680833	29.3348	37.5837
0.68125	48.2977	50.0162	18.0683		0.68125	29.2236	37.5213
0.681667	48.5208	50.0465	18.0594		0.681667	29.3126	37.5342
0.682083	48.3741	50.0592	17.986		0.682083	29.2962	37.5859
0.6825	48.6264	49.8841	17.9887		0.6825	29.2859	37.6331
0.682917	48.5244	50.0023	18.0249		0.682917	29.3381	37.5425
0.683333	48.4671	50.2553	18.0392		0.683333	29.3582	37.6343
0.68375	48.533	50.2577	18.1302		0.68375	29.5086	37.7915
0.684167	48.558	50.528	18.0911		0.684167	29.3949	37.9051
0.684583	48.7415	50.5021	18.0141		0.684583	29.4962	37.722
0.685	49.0355	50.4519	18.0723		0.685	29.4807	37.8483
0.685417	48.9364	50.6502	18.0964		0.685417	29.5761	38.0224
0.685833	48.8514	50.6531	18.1039		0.685833	29.6815	37.8086
0.68625	49.0138	50.7833	18.0974		0.68625	29.6264	37.9184
0.686667	49.1164	50.6255	18.0373		0.686667	29.6813	38.174
0.687083	49.0718	50.5608	17.976		0.687083	29.6829	38.1058
0.6875	49.1587	50.5529	18.0585		0.6875	29.6513	37.886
0.687917	49.4047	50.6448	17.995		0.687917	29.7519	37.9682
0.688333	49.3364	50.7479	18.0067		0.688333	29.6853	38.0727
0.68875	49.1701	50.856	18.0863		0.68875	29.7836	38.02
0.689167	49.4008	50.9795	18.0721		0.689167	29.8201	37.923
0.689583	49.5911	50.9056	18.1751		0.689583	29.8072	38.036
0.69	49.535	50.9447	18.1931		0.69	29.8214	38.0968
0.690417	49.6027	51.2137	18.1468		0.690417	29.8552	38.138
0.690833	49.5984	51.015	18.1574		0.690833	29.9927	38.1102
0.69125	49.5126	50.9988	18.1567		0.69125	29.9396	37.9884
0.691667	49.6489	51.2441	18.0813		0.691667	29.9876	37.9968
0.692083	49.7867	51.2765	18.1345		0.692083	29.9981	38.2282
0.6925	49.8058	51.2865	18.2008		0.6925	29.929	38.1912
0.692917	49.8239	51.3586	18.1662		0.692917	30.0847	38.2412
0.693333	49.8776	51.3168	18.2389		0.693333	30.0515	38.1671
0.69375	49.9552	51.4316	18.219		0.69375	30.0733	38.1023
0.694167	50.1319	51.4994	18.106		0.694167	30.121	38.1548
0.694583	50.0593	51.7618	18.1068		0.694583	30.07	38.081
0.695	50.0668	51.6886	18.1745		0.695	30.1957	38.1929
0.695417	50.1459	51.7559	18.1274		0.695417	30.2691	38.2597
0.695833	50.2872	51.8578	18.1652		0.695833	30.1936	38.3876
0.69625	50.4907	51.8905	18.2978		0.69625	30.2521	38.3553
0.696667	50.5874	51.8293	18.302		0.696667	30.2581	38.2679
0.697083	50.4114	51.7368	18.3179		0.697083	30.2933	38.2953
0.6975	50.4409	52.0168	18.1977		0.6975	30.4275	38.4452
0.697917	50.7326	52.4034	18.1865		0.697917	30.3178	38.4432
0.698333	50.6735	52.1509	18.2799		0.698333	30.3991	38.422
0.69875	50.7374	52.1171	18.2614		0.69875	30.4523	38.4432
0.699167	50.6395	52.1451	18.1796		0.699167	30.472	38.4679
0.699583	50.9825	52.3067	18.2279		0.699583	30.5815	38.3968
0.7	50.7738	52.2581	18.3172		0.7	30.5431	38.4655
0.700417	50.9704	52.361	18.4473		0.700417	30.5873	38.4704
0.700833	51.087	52.5153	18.3816		0.700833	30.5769	38.6114
0.70125	50.9618	52.4772	18.3847		0.70125	30.6623	38.7179
0.701667	51.0325	52.6122	18.3382		0.701667	30.7362	38.5457
0.702083	51.2355	52.6326	18.356		0.702083	30.6267	38.4063
0.7025	51.2824	52.6155	18.3526		0.7025	30.6763	38.6563
0.702917	51.2461	52.8931	18.4644		0.702917	30.8312	38.7795
0.703333	51.3339	52.8881	18.4317		0.703333	30.7336	38.7191
0.70375	51.5807	52.9152	18.3784		0.70375	30.8432	38.7841
0.704167	51.4074	52.994	18.3243		0.704167	30.8277	38.8714
0.704583	51.769	53.0899	18.4811		0.704583	30.8756	38.885
0.705	51.7575	53.1927	18.513		0.705	30.944	38.8564
0.705417	51.7704	53.1022	18.4424		0.705417	30.929	38.9347
0.705833	51.8392	53.2369	18.4595		0.705833	31.0242	38.9679
0.70625	51.9079	53.3848	18.4472		0.70625	30.9864	38.9252
0.706667	52.0355	53.4382	17.8611		0.706667	31.0708	38.8553
0.707083	52.0354	53.3578	17.693		0.707083	31.1328	38.9378
0.7075	51.9087	53.5324	17.9197		0.7075	31.0684	39.1016
0.707917	52.0286	53.3173	17.9238		0.707917	31.1486	38.8696
0.708333	52.1446	53.3754	18.0713		0.708333	31.154	38.7736
0.70875	52.4001	53.4198	18.15		0.70875	31.1742	39.1106
0.709167	52.2999	53.5019	18.2201		0.709167	31.2917	39.0201
0.709583	52.1398	53.7953	18.1876		0.709583	31.2524	38.9018
0.71	52.3299	53.786	18.2155		0.71	31.3095	39.1348
0.710417	52.5238	53.8205	18.2815		0.710417	31.2919	39.0079
0.710833	52.3931	53.9798	18.3183		0.710833	31.3555	39.1849
0.71125	52.5065	53.9906	18.2072		0.71125	31.3731	39.1186
0.711667	52.7693	54.2349	18.2198		0.711667	31.3934	39.2511
0.712083	52.6316	54.2706	18.2542		0.712083	31.5077	39.2493
0.7125	52.8196	53.998	18.2868		0.7125	31.493	39.2879
0.712917	52.8202	54.0654	18.2933		0.712917	31.5066	39.2802
0.713333	52.9288	53.9927	18.2964		0.713333	31.4872	39.3355
0.71375	53.1117	54.1351	18.3012		0.71375	31.5846	39.2947
0.714167	53.1294	54.2323	18.2945		0.714167	31.6812	39.3124
0.714583	53.3425	54.4578	18.2178		0.714583	31.6125	39.3034
0.715	53.1651	54.5048	18.1914		0.715	31.6814	39.3026
0.715417	53.1671	54.5723	18.2078		0.715417	31.7534	39.3203
0.715833	53.5462	54.7293	18.1558		0.715833	31.7094	39.4812
0.71625	53.6666	54.7696	18.2693		0.71625	31.8238	39.747
0.716667	53.5286	54.8497	18.2866		0.716667	31.777	39.4592
0.717083	53.5742	54.8411	18.3317		0.717083	31.8175	39.4161
0.7175	53.9008	54.8594	18.2705		0.7175	31.9264	39.54
0.717917	53.785	54.8478	18.3936		0.717917	31.8974	39.464
0.718333	53.7286	55.0619	18.4406		0.718333	31.9602	39.5979
0.71875	53.8037	54.8884	18.4672		0.71875	31.9756	39.5984
0.719167	53.9698	54.9368	18.5153		0.719167	32.0266	39.5805
0.719583	53.9744	55.1396	18.4621		0.719583	32.0913	39.7586
0.72	54.0391	55.159	18.4568		0.72	32.0521	39.7201
0.720417	54.2078	55.1664	18.3536		0.720417	32.2076	39.4803
0.720833	54.3032	55.2094	18.3981		0.720833	32.0802	39.7991
0.72125	54.4778	55.5223	18.4172		0.72125	32.1784	39.8549
0.721667	54.5759	55.4515	18.4889		0.721667	32.1959	39.8145
0.722083	54.4226	55.5769	18.4731		0.722083	32.2334	39.847
0.7225	54.4279	55.8322	18.5364		0.7225	32.3477	39.9004
0.722917	54.2822	55.658	18.4936		0.722917	32.2473	39.8042
0.723333	54.3722	55.6342	18.543		0.723333	32.3361	39.8257
0.72375	54.5522	55.7518	18.5177		0.72375	32.3754	39.8681
0.724167	54.77	55.8919	18.5232		0.724167	32.3836	40.0045
0.724583	54.7472	55.9638	18.5556		0.724583	32.4267	39.8334
0.725	55.0265	56.0051	18.5601		0.725	32.4183	40.0623
0.725417	55.0346	55.9407	18.6058		0.725417	32.483	39.9821
0.725833	54.7194	56.1895	18.6781		0.725833	32.4624	39.9196
0.72625	54.8725	56.0738	18.6071		0.72625	32.5246	39.853
0.726667	55.0823	56.2222	18.5318		0.726667	32.6205	40.1664
0.727083	55.2194	56.3752	18.5985		0.727083	32.6033	40.0974
0.7275	55.3732	56.5641	18.631		0.7275	32.6322	40.1634
0.727917	55.2688	56.3164	18.6874		0.727917	32.6759	40.2101
0.728333	55.3343	56.4434	18.6833		0.728333	32.7165	40.2873
0.72875	55.4311	56.6553	18.6568		0.72875	32.8034	40.0675
0.729167	55.5768	56.9264	18.7006		0.729167	32.8039	39.9953
0.729583	55.5044	56.8825	18.7017		0.729583	32.8773	39.939
0.73	55.5275	56.7045	18.7779		0.73	32.8569	39.8891
0.730417	55.6068	56.8057	18.7991		0.730417	32.9753	40.1388
0.730833	55.8139	56.985	18.7536		0.730833	32.9702	40.2149
0.73125	55.8801	57.0212	18.7264		0.73125	32.9294	40.2372
0.731667	56.1334	57.0046	18.7877		0.731667	33.0223	40.3205
0.732083	56.1264	57.1295	18.7917		0.732083	33.0424	40.3363
0.7325	56.1634	57.3195	18.811		0.7325	33.127	40.3501
0.732917	56.2169	57.33	18.7715		0.732917	33.1454	40.3766
0.733333	56.3562	57.1378	18.8378		0.733333	33.1279	40.6683
0.73375	56.4938	57.2808	19.0007		0.73375	33.1388	40.5338
0.734167	56.6837	57.5397	18.9932		0.734167	33.1692	40.7657
0.734583	56.6305	57.4706	18.9459		0.734583	33.2944	40.4256
0.735	56.6462	57.7086	18.886		0.735	33.313	40.405
0.735417	56.6335	57.8035	18.8758		0.735417	33.3071	40.4099
0.735833	56.7527	57.7329	18.7758		0.735833	33.4123	40.2576
0.73625	56.7975	57.5595	18.8068		0.73625	33.4298	40.4321
0.736667	56.7129	57.7413	18.8501		0.736667	33.4897	40.6614
0.737083	56.8626	57.8797	18.9131		0.737083	33.4933	40.6025
0.7375	56.9139	57.8399	18.9801		0.7375	33.5663	40.6917
0.737917	56.9324	58.1729	19.0188		0.737917	33.6026	40.5973
0.738333	57.1302	58.1206	18.9841		0.738333	33.5467	40.5927
0.73875	57.2544	58.186	19.0027		0.73875	33.6352	40.6693
0.739167	57.342	58.2232	19.0316		0.739167	33.6247	40.7697
0.739583	57.3952	58.4761	18.9546		0.739583	33.7409	40.5588
0.74	57.5744	58.2282	19.0505		0.74	33.7802	40.6626
0.740417	57.8398	58.531	19.1108		0.740417	33.7114	40.551
0.740833	57.7442	58.5943	19.0924		0.740833	33.8091	40.7975
0.74125	57.8683	58.6288	19.1287		0.74125	33.8427	40.7687
0.741667	57.82	58.7447	19.1168		0.741667	33.8858	40.9386
0.742083	57.7513	58.634	19.1817		0.742083	33.945	41.0923
0.7425	58.027	58.8938	19.1035		0.7425	33.8916	40.9252
0.742917	58.147	58.8036	19.0451		0.742917	33.9787	41.2696
0.743333	58.0798	58.848	19.0738		0.743333	33.9939	41.0183
0.74375	58.2852	59.039	19.0426		0.74375	33.987	41.1398
0.744167	58.3068	59.2418	19.0133		0.744167	34.122	41.0615
0.744583	58.5006	59.1316	19.0815		0.744583	34.099	40.9197
0.745	58.4783	59.2456	19.1698		0.745	34.2208	41.0467
0.745417	58.5377	59.3703	19.1252		0.745417	34.2076	40.9382
0.745833	58.5221	59.4523	19.1436		0.745833	34.2037	41.035
0.74625	58.4425	59.4617	19.1666		0.74625	34.299	40.9283
0.746667	58.5638	59.6572	19.2957		0.746667	34.2463	40.9345
0.747083	58.6857	59.7728	19.3842		0.747083	34.3342	41.1143
0.7475	58.7375	59.6608	19.2952		0.7475	34.3812	41.0996
0.747917	58.8307	59.8225	19.1782		0.747917	34.3826	41.1731
0.748333	59.0644	59.8933	19.1932		0.748333	34.4711	41.0962
0.74875	59.0978	59.9255	19.2716		0.74875	34.5266	41.1152
0.749167	59.0833	60.0505	19.2484		0.749167	34.5291	41.1113
0.749583	59.2517	60.0059	19.2305		0.749583	34.5472	41.0596
0.75	59.2984	59.9467	19.2944		0.75	34.5965	41.2714
0.750417	59.4591	60.0487	19.311		0.750417	34.6732	41.2031
0.750833	59.5835	60.1771	19.315		0.750833	34.6909	41.2384
0.75125	59.5349	60.2455	19.4008		0.75125	34.7328	41.2122
0.751667	59.4533	60.2058	19.3745		0.751667	34.7691	41.3796
0.752083	59.5985	60.3046	19.3562		0.752083	34.7549	41.5767
0.7525	59.7313	60.6503	19.3265		0.7525	34.8496	41.4354
0.752917	59.8594	60.5198	19.3838		0.752917	34.8267	41.4321
0.753333	59.9883	60.7727	19.4125		0.753333	34.8872	41.8318
0.75375	60.0929	60.729	19.3863		0.75375	34.9961	41.6719
0.754167	60.2778	60.8416	19.4049		0.754167	34.9411	41.5418
0.754583	60.2774	60.9737	19.4119		0.754583	35.1029	41.4919
0.755	60.1927	61.0793	19.4412		0.755	35.0866	41.5327
0.755417	60.2242	61.0697	19.4745		0.755417	35.0897	41.8098
0.755833	60.4858	61.0763	19.4943		0.755833	35.1788	41.6611
0.75625	60.4332	61.1391	19.535		0.75625	35.2176	41.5016
0.756667	60.3676	61.354	19.5424		0.756667	35.3043	41.6474
0.757083	60.4294	61.3833	19.5187		0.757083	35.2579	41.6435
0.7575	60.6476	61.5097	19.5733		0.7575	35.2925	41.7626
0.757917	60.6978	61.4475	19.628		0.757917	35.3867	41.6777
0.758333	60.9103	61.5424	19.547		0.758333	35.4549	41.7835
0.75875	61.0497	61.6108	19.5896		0.75875	35.5263	41.7301
0.759167	61.0558	61.8838	19.6277		0.759167	35.5419	41.664
0.759583	61.2623	61.8086	19.6282		0.759583	35.5867	41.9632
0.76	61.3386	61.8294	19.6242		0.76	35.616	41.9769
0.760417	61.3426	61.8655	19.6866		0.760417	35.6397	41.7245
0.760833	61.4607	61.9766	19.6881		0.760833	35.7484	41.8116
0.76125	61.5479	62.2754	19.6019		0.76125	35.734	41.7957
0.761667	61.6675	62.235	19.6647		0.761667	35.8088	41.6628
0.762083	61.9136	62.179	19.6204		0.762083	35.8403	41.8988
0.7625	61.9454	62.4382	19.6656		0.7625	35.8639	42.0242
0.762917	62.0513	62.5911	19.7569		0.762917	35.9415	42.1842
0.763333	62.0679	62.5086	19.7216		0.763333	35.9497	42.0165
0.76375	62.0885	62.642	19.6075		0.76375	36.0313	42.1513
0.764167	62.2452	62.5544	19.6465		0.764167	36.0403	42.1246
0.764583	62.3439	62.7939	19.5881		0.764583	36.0194	42.1646
0.765	62.267	62.7127	19.6556		0.765	36.1719	42.1668
0.765417	62.4059	62.946	19.5791		0.765417	36.1183	42.1536
0.765833	62.5269	63.1094	19.6225		0.765833	36.1981	42.3595
0.76625	62.5188	63.0466	19.6684		0.76625	36.2673	42.1717
0.766667	62.6491	63.0564	19.6336		0.766667	36.3183	42.0465
0.767083	63.0478	63.3199	19.7547		0.767083	36.4208	42.1792
0.7675	63.1998	63.4029	19.7777		0.7675	36.3728	42.2524
0.767917	63.0534	63.492	19.8406		0.767917	36.4771	42.3492
0.768333	63.0403	63.361	19.8433		0.768333	36.4769	42.3295
0.76875	63.1757	63.7144	19.9485		0.76875	36.5023	42.2736
0.769167	63.1434	63.679	19.8538		0.769167	36.6002	42.3479
0.769583	63.0954	63.7945	19.8252		0.769583	36.5882	42.5056
0.77	63.3162	63.9257	19.8829		0.77	36.6386	42.2778
0.770417	63.5309	64.3223	19.8786		0.770417	36.7253	42.3061
0.770833	63.576	64.3359	19.8413		0.770833	36.7636	42.6147
0.77125	63.629	64.2523	19.8264		0.77125	36.8033	42.5853
0.771667	63.752	64.4781	19.9003		0.771667	36.734	42.6567
0.772083	64.0044	64.5634	19.8714		0.772083	36.9464	42.4468
0.7725	64.1654	64.48	19.878		0.7725	36.9193	42.4898
0.772917	64.2175	64.5043	19.897		0.772917	36.9446	42.4883
0.773333	64.2858	64.7557	19.9612		0.773333	37.0036	42.5332
0.77375	64.2379	64.7193	19.8934		0.77375	37.0114	42.6708
0.774167	64.331	64.7897	19.8721		0.774167	37.1345	42.6664
0.774583	64.51	64.9807	19.9231		0.774583	37.1238	42.7588
0.775	64.6972	64.9353	20.004		0.775	37.2086	42.9557
0.775417	64.6561	65.1111	19.9671		0.775417	37.2652	42.9428
0.775833	64.6281	65.1747	19.8929		0.775833	37.2195	42.8453
0.77625	64.7445	65.2308	20.0402		0.77625	37.3484	42.8434
0.776667	65.0033	65.3025	20.0589		0.776667	37.277	42.8631
0.777083	64.948	65.3866	20.0195		0.777083	37.4287	42.9944
0.7775	65.1006	65.231	20.0649		0.7775	37.4607	42.992
0.777917	65.074	65.3607	20.0702		0.777917	37.4681	42.8955
0.778333	65.076	65.6823	20.22		0.778333	37.5825	42.9057
0.77875	65.353	65.8756	20.2084		0.77875	37.5403	42.9902
0.779167	65.3534	65.8153	20.2079		0.779167	37.6057	42.9121
0.779583	65.4616	65.9095	20.0719		0.779583	37.6898	42.8768
0.78	65.6912	65.9762	20.1021		0.78	37.6861	42.9056
0.780417	65.796	66.1079	20.1412		0.780417	37.7777	43.0552
0.780833	65.9147	66.2607	20.2076		0.780833	37.8314	43.0271
0.78125	65.9057	66.2395	20.2086		0.78125	37.8974	43.0343
0.781667	65.9302	66.0977	20.2239		0.781667	37.9389	43.0814
0.782083	66.1894	66.4934	20.2537		0.782083	37.9442	42.9579
0.7825	65.9798	66.4829	20.3744		0.7825	38.0336	43.2129
0.782917	66.0784	66.7136	20.2935		0.782917	38.0649	43.388
0.783333	66.3023	66.6746	20.319		0.783333	38.1302	43.2486
0.78375	66.3753	66.6619	20.3167		0.78375	38.2323	43.1951
0.784167	66.6013	66.8417	20.2271		0.784167	38.234	43.2096
0.784583	66.7083	66.7647	20.2057		0.784583	38.2699	43.3975
0.785	66.8859	66.9425	20.2705		0.785	38.3061	43.3742
0.785417	66.82	67.2792	20.3161		0.785417	38.3855	43.4103
0.785833	66.9097	67.1644	20.3221		0.785833	38.4602	43.5793
0.78625	67.109	67.4028	20.3325		0.78625	38.4853	43.6087
0.786667	67.3241	67.1922	20.4201		0.786667	38.6074	43.6539
0.787083	67.1394	67.395	20.3873		0.787083	38.5346	43.4906
0.7875	67.2313	67.7078	20.4115		0.7875	38.6117	43.6105
0.787917	67.3582	67.5547	20.4322		0.787917	38.6843	43.6216
0.788333	67.4674	67.5978	20.4394		0.788333	38.704	43.5839
0.78875	67.5897	67.848	20.5051		0.78875	38.7622	43.5006
0.789167	67.6309	67.7884	20.5238		0.789167	38.8132	43.597
0.789583	67.7805	68.0507	20.5574		0.789583	38.9045	43.6071
0.79	67.9351	68.1305	20.5721		0.79	38.8726	43.6253
0.790417	67.9027	68.1464	20.4765		0.790417	39.0166	43.666
0.790833	68.0312	68.2076	20.469		0.790833	39.0815	43.6685
0.79125	68.1739	68.4431	20.4963		0.79125	39.0647	43.7517
0.791667	68.1576	68.6298	20.534		0.791667	39.1812	43.8985
0.792083	68.3019	68.6267	20.5161		0.792083	39.1494	43.9815
0.7925	68.4085	68.6845	20.5832		0.7925	39.3175	43.8311
0.792917	68.7455	68.7629	20.5999		0.792917	39.3014	43.8746
0.793333	68.5924	69.0326	20.6246		0.793333	39.3324	43.8263
0.79375	68.7339	69.0312	20.667		0.79375	39.4271	43.9793
0.794167	68.832	69.0938	20.6348		0.794167	39.4363	44.0106
0.794583	68.8665	69.1943	20.7454		0.794583	39.5345	44.0366
0.795	69.2177	69.5206	20.7489		0.795	39.5126	44.1569
0.795417	69.2825	69.3318	20.7764		0.795417	39.5632	44.1536
0.795833	69.4314	69.2421	20.7958		0.795833	39.6278	43.9999
0.79625	69.2923	69.2761	20.8437		0.79625	39.6406	44.0232
0.796667	69.4474	69.6009	20.8267		0.796667	39.7023	44.1579
0.797083	69.466	69.7651	20.7928		0.797083	39.7185	44.208
0.7975	69.5013	69.7425	20.7535		0.7975	39.8133	44.1931
0.797917	69.772	69.7779	20.7257		0.797917	39.927	44.2715
0.798333	69.8652	69.8154	20.7675		0.798333	39.8689	44.15
0.79875	70.0008	69.9888	20.7752		0.79875	39.9768	44.2941
0.799167	70.1323	70.3767	20.8091		0.799167	40.0318	44.3581
0.799583	70.1368	70.2418	20.7858		0.799583	40.0711	44.5068
0.8	70.2625	70.2294	20.8051		0.8	40.1433	44.4591
0.800417	70.4257	70.3727	20.8177		0.800417	40.1076	44.7133
0.800833	70.5435	70.5729	20.8825		0.800833	40.2859	44.3823
0.80125	70.5605	70.617	20.9061		0.80125	40.2657	44.5182
0.801667	70.7083	70.7131	20.8824		0.801667	40.2841	44.5231
0.802083	70.7006	70.773	20.9115		0.802083	40.3855	44.404
0.8025	70.912	70.8415	20.9637		0.8025	40.4122	44.342
0.802917	71.2155	70.8614	20.9956		0.802917	40.482	44.3481
0.803333	71.1975	70.9676	20.9834		0.803333	40.509	44.3237
0.80375	71.1332	70.9683	20.9859		0.80375	40.6204	44.5433
0.804167	71.2748	71.1138	20.9335		0.804167	40.6156	44.4871
0.804583	71.5409	71.3432	21.0251		0.804583	40.6947	44.3498
0.805	71.6567	71.5834	21.0423		0.805	40.7882	44.6967
0.805417	71.8568	71.7217	21.0446		0.805417	40.7557	44.7274
0.805833	71.7839	71.5719	20.9954		0.805833	40.8753	45.0203
0.80625	71.8317	71.4945	20.9904		0.80625	40.8909	44.773
0.806667	72.1098	71.627	20.9897		0.806667	40.9406	44.7224
0.807083	72.2919	71.8126	21.0471		0.807083	41.0628	44.7802
0.8075	72.2112	71.7985	21.0995		0.8075	41.015	44.7967
0.807917	72.2848	72.1213	21.1316		0.807917	41.1566	44.7954
0.808333	72.4263	72.1363	21.1356		0.808333	41.1965	44.8194
0.80875	72.2395	72.1543	21.0854		0.80875	41.1932	44.9333
0.809167	72.5248	72.2355	21.1703		0.809167	41.3618	44.7839
0.809583	72.7924	72.4057	21.1732		0.809583	41.3169	44.7378
0.81	72.784	72.6076	21.1993		0.81	41.4187	44.954
0.810417	72.8918	72.7655	21.2435		0.810417	41.4259	45.0616
0.810833	72.9386	72.7283	21.1506		0.810833	41.5475	44.9024
0.81125	73.1197	72.8286	21.1008		0.81125	41.6136	45.0248
0.811667	73.1889	72.7538	21.1068		0.811667	41.592	45.1538
0.812083	73.2259	72.6836	21.1246		0.812083	41.7026	45.0533
0.8125	73.3048	72.9013	21.183		0.8125	41.7676	45.3395
0.812917	73.5197	73.185	21.3078		0.812917	41.8038	45.1986
0.813333	73.4972	73.4638	21.3523		0.813333	41.8848	45.1525
0.81375	73.8524	73.5582	21.3025		0.81375	41.9394	45.4108
0.814167	73.8697	73.5413	21.2632		0.814167	41.964	45.2946
0.814583	73.9058	73.572	21.2599		0.814583	42.0651	45.2007
0.815	74.1398	73.7347	21.3342		0.815	42.0857	45.3323
0.815417	74.1879	74.0123	21.3638		0.815417	42.2526	45.2968
0.815833	74.366	74.0071	21.441		0.815833	42.1579	45.4479
0.81625	74.3385	73.9221	21.3841		0.81625	42.2391	45.4633
0.816667	74.5262	74.0073	21.4856		0.816667	42.335	45.5419
0.817083	74.6726	74.264	21.4784		0.817083	42.3124	45.4043
0.8175	74.7731	74.3989	21.3702		0.8175	42.5392	45.3202
0.817917	74.8892	74.6574	21.5209		0.817917	42.4853	45.4455
0.818333	74.9515	74.6689	21.4719		0.818333	42.5429	45.4251
0.81875	75.0042	74.7889	21.4809		0.81875	42.6897	45.5541
0.819167	75.0662	74.8389	21.5678		0.819167	42.6477	45.5393
0.819583	75.3271	74.8316	21.5854		0.819583	42.7745	45.7222
0.82	75.2346	74.891	21.6068		0.82	42.7759	45.6727
0.820417	75.327	74.888	21.4677		0.820417	42.8286	45.7581
0.820833	75.6492	75.2316	21.6526		0.820833	42.9	45.6249
0.82125	75.8858	75.2834	21.5576		0.82125	42.9363	45.7504
0.821667	75.9373	75.4024	21.653		0.821667	43.0182	45.8976
0.822083	75.9185	75.4634	21.7364		0.822083	43.0473	45.8133
0.8225	76.1363	75.5508	21.7688		0.8225	43.198	45.8613
0.822917	76.2448	75.8116	21.7242		0.822917	43.249	45.7203
0.823333	76.4175	76.035	21.6111		0.823333	43.3339	45.6652
0.82375	76.611	75.8025	21.6198		0.82375	43.4094	45.9503
0.824167	76.6206	76.0588	21.7033		0.824167	43.3777	45.7506
0.824583	76.5294	76.0201	21.8381		0.824583	43.4863	45.793
0.825	76.8199	76.2815	21.6951		0.825	43.536	46.0287
0.825417	76.9565	76.143	21.7951		0.825417	43.6026	46.0516
0.825833	77.1191	76.2457	21.8143		0.825833	43.7195	46.1803
0.82625	77.1426	76.4879	21.8443		0.82625	43.6536	46.244
0.826667	77.2662	76.7027	21.7801		0.826667	43.7658	46.1869
0.827083	77.4053	76.7924	21.8004		0.827083	43.7904	46.2582
0.8275	77.3793	76.8589	21.7914		0.8275	43.9506	46.1968
0.827917	77.5975	76.877	21.8505		0.827917	43.9832	46.162
0.828333	78.0517	77.1127	21.7631		0.828333	44.0144	46.2753
0.82875	78.133	77.1985	21.8617		0.82875	44.081	46.1648
0.829167	78.066	77.3046	21.946		0.829167	44.1147	46.1521
0.829583	78.2555	77.3636	21.9871		0.829583	44.1729	46.4674
0.83	78.4046	77.4435	22.0404		0.83	44.2639	46.2657
0.830417	78.2069	77.6467	22.0375		0.830417	44.2834	46.2792
0.830833	78.2822	77.667	21.8741		0.830833	44.4043	46.3341
0.83125	78.4217	77.8501	21.9481		0.83125	44.4481	46.4272
0.831667	78.5516	78.012	21.9862		0.831667	44.5165	46.4563
0.832083	79.0479	78.0325	22.0303		0.832083	44.615	46.4484
0.8325	79.3332	78.1649	21.9894		0.8325	44.6265	46.3861
[truncated: 5,082 more rows]
