# Supplementary material for: Extracellular electron transfer increases fermentation in lactic acid bacteria via a hybrid metabolism
Source: eLife. 2022 Feb 11;11:e70684. doi: 10.7554/eLife.70684 (PMC8837199; doi:10.7554/eLife.70684)
Supplement: Figure 5—figure supplement 2—source data 1. [file elife-70684-fig5-figsupp2-data1.xlsx]

## Sheet: Sheet1
Succinate produced by L. plantarum under different growth conditions.
	ANODE 0.2 V
	time/d	Succinate
	0	0
	0.270833
	0.958333	0.0108665
	1.27083
	1.95833	0.0161528
	2.95833	0
	3.95833	0.0271661
	4.95833
	time/d
	0	0
	0.270833
	0.958333	0.0114538
	1.27083
	1.95833	0.0202645
	2.95833	0
	3.95833	0.0199708
	4.95833
	time/d	Succinate
	0	0
	0.270833
	0.958333	0.0162997
	1.27083
	1.95833	0.0176213
	2.95833	0
	3.95833	0.0199708
	4.95833
	OCP
	time/d	Succinate
	0	0
	0.270833
	0.958333	0.011307
	1.27083
	1.95833	0.00895748
	2.95833
	3.95833	0.00925117
	4.95833
	time/d	Succinate
	0	0
	0.270833
	0.958333	0.00792958
	1.27083
	1.95833	0.0101322
	2.95833
	3.95833	0.00998539
	4.95833
	time/d	Succinate
	0	0
	0.270833
	0.958333	0.00704851
	1.27083
	1.95833	0.011307
	2.95833
	3.95833	0.00910433
	4.95833

## Sheet: Sheet2
Metabolites produced by L. plantarum NCIMB8826 under different growth conditions.
	ANODE 0.2 V
REP1	time/d	Pyruvate (mM)	Succinate (mM)	Formate (mM)
	0	0	0	0
	0.270833
	0.958333	0.609638	0.0108665	0
	1.27083
	1.95833	0.706255	0.0161528	0.06955
	2.95833	0.993027	0.0192366	0.0740012
	3.95833	0.826346	0.0271661	0.08346
	time/d	Pyruvate (mM)	Succinate (mM)	Formate (mM)
REP2	0	0	0	0
	0.270833
	0.958333	0.531733	0.0114538	0
	1.27083
	1.95833	0.563541	0.0202645	0.14522
	2.95833	1.10378	0.0220266	0.0662116
	3.95833	0.717142	0.0151249	0.066768
REP3	time/d	Pyruvate (mM)	Succinate (mM)	Formate (mM)
	0	0	0	0
	0.270833
	0.958333	0.529691	0.0162997	0
	1.27083
	1.95833	0.519485	0.0176213	0.0367224
	2.95833	1.07197	0.0154186	0.0567528
	3.95833	1.03438	0.0199708	0
	OCP
REP1`	time/d	Pyruvate (mM)	Succinate (mM)	Formate (mM)
	0	0	0	0
	0.270833
	0.958333	0.231166	0.011307
	1.27083
	1.95833	0.639066	0.00895748
	2.95833
	3.95833	1.06193	0.0127754
REP2	time/d	Pyruvate (mM)	Succinate (mM)	Formate (mM)
	0	0	0	0
	0.270833
	0.958333	0.62937	0.00792958	0
	1.27083
	1.95833	0.49261	0.0101322	0.0339404
	2.95833
	3.95833	0.773955	0.00998539	0.144664
REP3	time/d	Pyruvate (mM)	Succinate (mM)	Formate (mM)
	0	0	0	0
	0.270833
	0.958333	0.507919	0.00704851	0
	1.27083
	1.95833	0.39055	0.011307	0.0383916
	2.95833
	3.95833	0.719326	0.00910433	0.134092
