# Supplementary material for: Extracellular electron transfer increases fermentation in lactic acid bacteria via a hybrid metabolism
Source: eLife. 2022 Feb 11;11:e70684. doi: 10.7554/eLife.70684 (PMC8837199; doi:10.7554/eLife.70684)
Supplement: Figure 5—source data 1. [file elife-70684-fig5-data1.xlsx]

## Sheet: Panel A, C-F
Metabolites produced by L. plantarum NCIMB8826 under different growth conditions.
	ANODE 0.2 V
REP1	time/d	Pyruvate (mM)	Succinate (mM)	Lactate (mM)	Acetate (mM)	Ethanol (mM)	Formate (mM)	Mannitol (g/L)
	0		0	0	0	0	0	20
	0.270833
	0.958333	0.609638	0.0108665	2.18319	0.0779475	0.127213	0	19.6497
	1.27083
	1.95833	0.706255	0.0161528	6.55512	0.153322	2.4627	0.06955	19.283
	2.95833	0.993027	0.0192366	10.351	0.229362	0.792912	0.0740012	18.3
	3.95833	0.826346	0.0271661	12.0231	0.400607	0.752435	0.08346	18.2274
	time/d	Pyruvate (mM)	Succinate (mM)	Lactate (mM)	Acetate (mM)	Ethanol (mM)	Formate (mM)	Mannitol (g/L)
REP2	0		0	0	0	0	0	20
	0.270833
	0.958333	0.531733	0.0114538	2.54581	0.094939	0.363568	0	20.1939
	1.27083
	1.95833	0.563541	0.0202645	7.79716	0.0780806	0.570289	0.14522	18.9623
	2.95833	1.10378	0.0220266	11.1687	0.314097	0.594864	0.0662116	17.6706
	3.95833	0.717142	0.0151249	12.6062	0.632187	0.549328	0.066768	17.8362
REP3	time/d	Pyruvate (mM)	Succinate (mM)	Lactate (mM)	Acetate (mM)	Ethanol (mM)	Formate (mM)	Mannitol (g/L)
	0		0	0	0	0	0	20
	0.270833
	0.958333	0.529691	0.0162997	2.25634	0.0836261	3.29524	0
	1.27083
	1.95833	0.519485	0.0176213	7.17372	0.104699	3.90095	0.0367224	18.6064
	2.95833	1.07197	0.0154186	10.9532	0.310548	0.506683	0.0567528	19.0147
	3.95833	1.03438	0.0199708	12.6001	0.606012	0.46476	0	18.7933
	OCP
REP1`	time/d	Pyruvate (mM)	Succinate (mM)	Lactate (mM)	Acetate (mM)	Ethanol (mM)	Formate (mM)	Mannitol (g/L)
	0	0	0	0	0	0	0	20
	0.270833
	0.958333	0.231166	0.011307	0.933211	0.033273	0.0802308		19.7947
	1.27083
	1.95833	0.639066	0.00895748	1.97164	0.0532368	0.514634		19.5944
	2.95833
	3.95833	1.06193	0.0127754	3.7603	0.0771934	0.0750989		19.1126
REP2	time/d	Pyruvate (mM)	Succinate (mM)	Lactate (mM)	Acetate (mM)	Ethanol (mM)	Formate (mM)	Mannitol (g/L)
	0		0	0	0	0		20
	0.270833
	0.958333	0.62937	0.00792958	1.14021	0.093608	1.49258	0	19.5526
	1.27083
	1.95833	0.49261	0.0101322	2.61833	0.101594	0.115648	0.0339404	18.8166
	2.95833
	3.95833	0.773955	0.00998539	3.61089	0.143296	0.318032	0.144664	18.7324
REP3	time/d	Pyruvate (mM)	Succinate (mM)	Lactate (mM)	Acetate (mM)	Ethanol (mM)	Formate (mM)	Mannitol (g/L)
	0		0	0	0	0		20
	0.270833
	0.958333	0.507919	0.00704851	0.919451	0.0358905	1.03722	0	20.1889
	1.27083
	1.95833	0.39055	0.011307	1.97182	0.0532368	0.37441	0.0383916	19.5944
	2.95833
	3.95833	0.719326	0.00910433	3.0129	0.150838	0.182146	0.134092	19.2685

## Sheet: Panel B
pH in bioreactors inoculated with L. plantarum NCIMB8826 under different conditions.
			pH
				oc	oc	oc			anode	anode	anode
		time/d	Sample				average	stdv	wt	wt	wt	average	stdv
		0	0	6.55	6.55	6.55	6.55	0	6.55	6.55	6.55	6.55	0
		0.270833	1
		0.958333	2	6.55	6.55	6.55	6.55	0	6.36	6.36	6.36	6.36	0
		1.27083	3
		1.95833	4	6.45	6.43	6.45	6.44333	0.011547	5.28	4.51	4.74	4.84333	0.395264
		2.95833	5	6.39	6.4	6.43	6.40667	0.0208167	3.82	3.57	3.66	3.68333	0.126623
		3.95833	6	6.37	6.38	6.42	6.39	0.0264575	3.59	3.39	3.43	3.47	0.10583
		4.95833	7	6.33	6.36	6.4	6.36333	0.0351188	3.5	3.38	3.38	3.42	0.069282
