# Supplementary material for: Extracellular electron transfer increases fermentation in lactic acid bacteria via a hybrid metabolism
Source: eLife. 2022 Feb 11;11:e70684. doi: 10.7554/eLife.70684 (PMC8837199; doi:10.7554/eLife.70684)
Supplement: Figure 6—figure supplement 1—source data 1. [file elife-70684-fig6-figsupp1-data1.xlsx]

## Sheet: Panel A
CFU enumeration of L. plantarum during kale juice fermentation.
				CFUS	Counting method: spots of 10uL
			Time	WT dhna	WT dhna	WT dhna	OC wt dhna	OC wt dhna	OC wt dhna	ABIOTIC	POL WT	POL WT
			0		5500000	3300000	3800000	4600000	4100000	0	4600000	4100000
			0.625	890000000	470000000	300000000	570000000	830000000	760000000	0	870000000	630000000
			1	780000000	430000000	400000000	800000000	820000000	910000000	40000000	750000000	330000000
			1.79167	400000000	720000000	510000000	650000000	250000000	640000000	0	520000000	520000000
			3.66667	67000000		113000000	67000000	0	24000000	3000000	46000000	82000000

## Sheet: Panel B
Metabolite production percentage by L. plantarum during kale juice fermentation.
	%SUCC	STDV	%LACT	STDV	%FORM	STDV	%ACET	STDV	% ETHA	STDV
	WT+DHNA (EET)	2.4556	0.11475	78.1093	1.11588	0.32671	0.28336	17.3264	1.48667	1.78203	2.32008
	OCP WT+DHNA	4.51419	0.14773	76.9661	3.35071	0.41804	0.02693	15.3408	0.62251	2.76088	4.10458
	WT (EET)	3.77472	0.15308	76.245	3.10141	1.01478	0.15493	15.2603	1.09608	3.70517	4.19565
