# Supplementary material for: Extracellular electron transfer increases fermentation in lactic acid bacteria via a hybrid metabolism
Source: eLife. 2022 Feb 11;11:e70684. doi: 10.7554/eLife.70684 (PMC8837199; doi:10.7554/eLife.70684)
Supplement: Figure 6—source data 1. [file elife-70684-fig6-data1.xlsx]

## Sheet: Panel B
Current production by L. plantarum in kale juice medium.
time/d	wt+dhna	wt+dhna	wt+dhna			ABIOTIC	<J>/µA/cm²		WT NO DHNA	wt	WT	MEAN	STDV
0	163.526	105.053	149.92				6.38867			5.08465	4.44943	4.76704	0.449173
0.000416667	110.493	66.5261	99.3399				6.4143			5.08492	4.45462	4.76977	0.44569
0.000833333	79.3025	53.9134	73.7877				6.38626			5.09352	4.46276	4.77814	0.446013
0.00125	64.7921	46.3283	60.7291				6.36218			5.09415	4.46949	4.78182	0.4417
0.00166667	55.6437	41.2053	52.285				6.39809			5.10254	4.48082	4.79168	0.439621
0.00208333	49.6867	38.1599	46.4834				6.42036			5.11174	4.48962	4.80068	0.439907
0.0025	45.614	35.926	42.7022				6.4206			5.11958	4.49478	4.80718	0.441798
0.00291667	42.7244	34.2282	41.3282				6.44584			5.11533	4.50022	4.80778	0.434952
0.00333333	40.8242	32.9468	41.1385				6.4388			5.12149	4.51085	4.81617	0.43179
0.00375	38.8003	32.1487	40.4136				6.45062			5.12475	4.52164	4.8232	0.426466
0.00416667	37.4044	31.3902	40.1703				6.39247			5.1266	4.52831	4.82745	0.423058
0.00458333	36.7879	30.9986	39.0205				6.45238			5.15621	4.53199	4.8441	0.441388
0.005	35.6755	30.3673	39.5351				6.44642			5.16889	4.54075	4.85482	0.444164
0.00541667	34.7108	29.84	40.3026				6.47008			5.17689	4.54864	4.86276	0.44424
0.00583333	34.316	29.5763	39.9099				6.4466			5.1855	4.56036	4.87293	0.442044
0.00625	33.6424	29.3893	38.3788				6.48302			5.19769	4.57265	4.88517	0.441974
0.00666667	33.2857	29.172	37.9408				6.44944			5.20859	4.5766	4.89259	0.446888
0.00708333	32.8383	28.8117	37.8826				6.4329			5.22443	4.58611	4.90527	0.451359
0.0075	32.5203	28.4751	37.9313				6.39623			5.23547	4.594	4.91474	0.453587
0.00791667	32.34	28.2484	37.3786				6.38563			5.24102	4.60527	4.92315	0.449541
0.00833333	31.8554	27.979	36.1855				6.39267			5.25615	4.61392	4.93503	0.454124
0.00875	31.5958	27.7299	35.8738				6.37371			5.26741	4.62603	4.94672	0.453521
0.00916667	31.0658	27.5059	36.4024				6.45263			5.28006	4.62654	4.9533	0.462114
0.00958333	30.7316	27.3294	35.5738				6.45199			5.29751	4.63495	4.96623	0.4685
0.01	30.5447	27.0615	35.8025				6.49678			5.29927	4.63989	4.96958	0.466254
0.0104167	30.3738	26.8258	36.5074				6.48975			5.30237	4.64663	4.9745	0.463672
0.0108333	30.1293	26.4743	37.2489				6.49915			5.30266	4.63823	4.97045	0.469824
0.01125	29.8434	26.1802	37.506				6.48128			5.31884	4.65729	4.98806	0.467785
0.0116667	29.6008	25.9906	37.05				6.46596			5.32445	4.67361	4.99903	0.460215
0.0120833	29.417	25.7755	37.134				6.43963			5.3287	4.67965	5.00418	0.458942
0.0125	29.2641	25.5898	37.8273				6.45276			5.32787	4.68365	5.00576	0.455533
0.0129167	28.9423	25.3721	38.621				6.48871			5.33531	4.69723	5.01627	0.451191
0.0133333	28.4653	25.1166	38.1936				6.44803			5.3388	4.70256	5.02068	0.449886
0.01375	28.3339	24.866	38.2305				6.47091			5.33738	4.70908	5.02323	0.444277
0.0141667	28.2337	24.7518	37.8503				6.48528			5.33695	4.71461	5.02578	0.440061
0.0145833	28.1835	24.5616	37.7315				6.46359			5.33961	4.73048	5.03504	0.430713
0.015	27.9067	24.4759	37.4616				6.41856			5.35447	4.73319	5.04383	0.439313
0.0154167	27.9164	24.1054	37.1686				6.44383			5.36133	4.73029	5.04581	0.446215
0.0158333	27.6788	24.0008	36.9972				6.46254			5.36944	4.73789	5.05366	0.446572
0.01625	27.3772	23.8899	36.8505				6.4888			5.3776	4.74196	5.05978	0.449468
0.0166667	27.514	23.7496	36.4378				6.47911			5.37984	4.7486	5.06422	0.446353
0.0170833	27.1384	23.5987	36.3648				6.48521			5.38985	4.75742	5.07364	0.447198
0.0175	26.9685	23.3861	36.0291				6.48534			5.39026	4.74786	5.06906	0.454246
0.0179167	26.7814	23.1073	35.9177				6.48097			5.39157	4.7525	5.07203	0.451893
0.0183333	26.7502	22.9704	35.4462				6.50098			5.39527	4.76126	5.07827	0.448308
0.01875	26.5817	22.7682	34.9963				6.52833			5.39326	4.76383	5.07855	0.445079
0.0191667	26.4524	22.5115	34.7159				6.48805			5.39706	4.7738	5.08543	0.440713
0.0195833	26.549	22.4083	34.6432				6.50886			5.40648	4.78241	5.09445	0.441289
0.02	26.3524	22.4567	34.2823				6.47941			5.40587	4.79011	5.09799	0.435408
0.0204167	26.082	22.3012	34.3282				6.47178			5.40377	4.78024	5.092	0.440902
0.0208333	25.8749	22.0969	33.9396				6.51464			5.40811	4.7868	5.09746	0.439335
0.02125	25.9369	21.9276	33.0579				6.49703			5.42118	4.79828	5.10973	0.440457
0.0216667	25.8312	21.859	32.1072				6.45169			5.41805	4.80341	5.11073	0.434616
0.0220833	25.7019	21.6883	32.3388				6.38953			5.41133	4.80954	5.11044	0.425535
0.0225	25.4792	21.4031	32.3679				6.38948			5.41888	4.81501	5.11694	0.427001
0.0229167	25.3767	21.3532	31.7823				6.39199			5.41828	4.81568	5.11698	0.426106
0.0233333	25.2321	21.2404	31.9777				6.41094			5.41547	4.82477	5.12012	0.417683
0.02375	25.1297	21.0591	31.7303				6.37791			5.41997	4.83304	5.12651	0.415027
0.0241667	25.1311	20.9525	32.201				6.31074			5.42538	4.83991	5.13264	0.413985
0.0245833	24.9017	20.7148	31.8033				6.3341			5.43021	4.8394	5.1348	0.417765
0.025	24.7788	20.6505	31.1785				6.3757			5.43023	4.8388	5.13451	0.418202
0.0254167	24.6044	20.5611	31.3235				6.39393			5.43066	4.8406	5.13563	0.417242
0.0258333	24.5145	20.3602	31.099				6.37594			5.433	4.85058	5.14179	0.411839
0.02625	24.462	20.1746	30.6849				6.34363			5.4267	4.86094	5.14382	0.400056
0.0266667	24.4323	20.1039	30.1873				6.30522			5.42502	4.86839	5.14671	0.393601
0.0270833	24.2598	20.0125	30.1247				6.32314			5.43327	4.87486	5.15407	0.394861
0.0275	24.1149	19.9128	29.8596				6.31011			5.43437	4.8777	5.15604	0.393627
0.0279167	24.0899	19.782	29.7251				6.36907			5.44023	4.87937	5.1598	0.396584
0.0283333	23.9932	19.7491	29.5269				6.30224			5.44543	4.8851	5.16527	0.396217
0.02875	23.8541	19.5203	29.4446				6.33336			5.43646	4.88404	5.16025	0.390618
0.0291667	23.6904	19.4839	29.0094				6.32548			5.44216	4.8928	5.16748	0.388459
0.0295833	23.6595	19.4321	29.0398				6.31946			5.44375	4.89519	5.16947	0.38789
0.03	23.6138	19.2537	28.6277				6.29939			5.43619	4.89728	5.16674	0.381066
0.0304167	23.5919	19.1731	28.2047				6.31421			5.44276	4.90023	5.17149	0.383627
0.0308333	23.5627	19.0781	27.456				6.29617			5.44005	4.90477	5.17241	0.378504
0.03125	23.525	18.9524	26.6492				6.26962			5.44069	4.90616	5.17342	0.37797
0.0316667	23.4376	18.7662	26.4952				6.30774			5.44967	4.91243	5.18105	0.379889
0.0320833	23.3461	18.6971	26.8056				6.24201			5.45047	4.91346	5.18196	0.379723
0.0325	23.2926	18.6251	26.2435				6.24163			5.45102	4.91919	5.1851	0.376061
0.0329167	23.1695	18.5073	26.3834				6.19717			5.44736	4.91644	5.1819	0.375413
0.0333333	24.0995	18.3789	26.3436				6.20216			5.45171	4.91765	5.18468	0.377633
0.03375	23.7931	18.2866	25.6622				6.1937			5.46033	4.92962	5.19498	0.375267
0.0341667	23.679	18.247	25.714				6.26656			5.45308	4.92598	5.18953	0.372714
0.0345833	23.6476	18.0978	25.825				6.22924			5.45318	4.92983	5.19151	0.370066
0.035	23.2126	17.9815	25.3395				6.19895			5.44722	4.93434	5.19078	0.362655
0.0354167	23.1459	17.9159	25.3497				6.22024			5.44975	4.93423	5.19199	0.364523
0.0358333	23.0405	17.8255	24.9366				6.19285			5.4461	4.9403	5.1932	0.357658
0.03625	22.8128	17.75	25.0058				6.20159			5.45009	4.94467	5.19738	0.357389
0.0366667	22.7686	17.6546	24.843				6.21937			5.4482	4.95045	5.19933	0.351963
0.0370833	22.665	17.577	24.6719				6.2317			5.45276	4.95704	5.2049	0.350528
0.0375	22.5838	17.6196	24.7256				6.21542			5.45508	4.96256	5.20882	0.34826
0.0379167	22.4995	17.3973	24.6487				6.19654			5.45954	4.96957	5.21455	0.34646
0.0383333	22.4243	17.2716	24.3866				6.1984			5.45304	4.9689	5.21097	0.342344
0.03875	22.2453	17.2525	24.0762				6.22431			5.45068	4.97301	5.21184	0.33776
0.0391667	22.1538	17.184	24.1659				6.20356			5.44989	4.97512	5.2125	0.335709
0.0395833	22.1441	17.1781	24.5939				6.20915			5.4436	4.97924	5.21142	0.328354
0.04	22.0021	17.1654	24.672				6.21742			5.44941	4.97648	5.21294	0.334409
0.0404167	22.0313	17.0507	24.3532				6.2411			5.44937	4.98355	5.21646	0.329382
0.0408333	21.9095	16.8158	24.5809				6.18143			5.45275	4.98447	5.21861	0.33113
0.04125	21.9664	16.7279	24.6736				6.19195			5.45656	4.99141	5.22399	0.328908
0.0416667	21.9642	16.6619	24.592				6.19266			5.45109	4.98409	5.21759	0.33022
0.0420833	21.705	16.5308	24.4711				6.16032			5.45094	4.98703	5.21898	0.328038
0.0425	21.5552	16.462	23.9833				6.12633			5.45857	4.98325	5.22091	0.336103
0.0429167	21.4483	16.4771	23.9262				6.13575			5.45008	4.99145	5.22076	0.324297
0.0433333	21.3508	16.4203	23.967				6.14801			5.44864	4.99673	5.22268	0.31955
0.04375	21.2544	16.2369	23.7153				6.17881			5.45306	4.99495	5.224	0.323934
0.0441667	21.1645	16.2351	23.515				6.18867			5.4622	5.00397	5.23308	0.324013
0.0445833	21.3206	16.1645	23.4778				6.19338			5.46876	5.00566	5.23721	0.327466
0.045	21.0506	16.1485	23.1754				6.22536			5.47389	5.01407	5.24398	0.325143
0.0454167	21.0538	16.1324	23.0997				6.20962			5.46991	5.02084	5.24537	0.317545
0.0458333	20.8868	16.0136	22.7172				6.21847			5.46046	5.02707	5.24377	0.306454
0.04625	20.8791	16.0003	22.739				6.21426			5.46766	5.03244	5.25005	0.307747
0.0466667	20.7596	15.8747	22.5478				6.19227			5.46984	5.04058	5.25521	0.303536
0.0470833	20.9009	15.8799	22.5473				6.17876			5.46861	5.04151	5.25506	0.302006
0.0475	20.6979	15.8651	22.3108				6.17807			5.46927	5.04284	5.25606	0.301528
0.0479167	20.6828	15.8101	22.3115				6.18069			5.4711	5.04122	5.25616	0.303973
0.0483333	20.5468	15.696	22.1128				6.16574			5.47421	5.04691	5.26056	0.302148
0.04875	20.6142	15.6311	21.942				6.06808			5.47171	5.05315	5.26243	0.295967
0.0491667	20.4654	15.6482	21.7689				5.56438			5.46659	5.05563	5.26111	0.290589
0.0495833	20.509	15.6087	21.6454				5.64244			5.47173	5.05657	5.26415	0.293566
0.05	20.4469	15.5455	22.3243				5.70677			5.47137	5.06045	5.26591	0.290561
0.0504167	20.2983	15.5725	22.313				5.73482			5.46945	5.06675	5.2681	0.284752
0.0508333	20.3392	15.4876	21.8992				5.74771			5.4731	5.06628	5.26969	0.287665
0.05125	20.3569	15.5023	22.0337				5.74006			5.48168	5.07301	5.27734	0.288971
0.0516667	20.285	15.4832	22.1403				5.80667			5.47937	5.07886	5.27912	0.283202
0.0520833	20.1978	15.3725	21.8756				5.77813			5.47894	5.07582	5.27738	0.285045
0.0525	20.0668	15.2774	21.6283				5.78137			5.4825	5.08777	5.28514	0.279122
0.0529167	19.8935	15.1977	21.5913				5.79993			5.488	5.0927	5.29035	0.279523
0.0533333	19.8277	15.1095	21.5887				5.83758			5.48157	5.09602	5.28879	0.27262
0.05375	19.9168	15.0349	21.5251				5.80295			5.48147	5.09964	5.29056	0.269994
0.0541667	19.8692	14.9029	21.3403				5.83112			5.48041	5.10712	5.29376	0.263956
0.0545833	19.9243	14.9491	21.2553				5.82745			5.47624	5.12857	5.30241	0.245836
0.055	19.7671	14.9574	21.2038				5.8926			5.482	5.13203	5.30701	0.247466
0.0554167	19.8497	14.8924	21.065				5.88699			5.49094	5.12237	5.30666	0.260624
0.0558333	19.8156	14.66	21.1109				5.89909			5.49418	5.11953	5.30686	0.264917
0.05625	19.6751	14.547	20.9796				5.8656			5.48853	5.12195	5.30524	0.259213
0.0566667	19.7084	14.5256	20.7884				5.86841			5.48821	5.12907	5.30864	0.253948
0.0570833	19.6206	14.4712	20.8253				5.84241			5.48916	5.13451	5.31183	0.25077
0.0575	19.2872	14.421	20.5445				5.83968			5.48874	5.1401	5.31442	0.246526
0.0579167	19.4105	14.404	20.2758				5.84611			5.50081	5.14878	5.3248	0.248919
0.0583333	19.3073	14.3354	20.1361				5.83666			5.50071	5.15196	5.32633	0.246596
0.05875	19.3097	14.2735	20.5284				5.84156			5.49599	5.15395	5.32497	0.241854
0.0591667	19.2395	14.2055	20.4586				5.81593			5.49778	5.15491	5.32635	0.242451
0.0595833	19.2295	14.2091	20.6774				5.85564			5.50039	5.15377	5.32708	0.245097
0.06	19.0609	14.1629	20.4206				5.88191			5.50925	5.15819	5.33372	0.248241
0.0604167	19.1203	14.0855	20.0915				5.87884			5.51353	5.15394	5.33373	0.254268
0.0608333	18.9716	14.0958	19.9886				5.87988			5.5136	5.15484	5.33422	0.253682
0.06125	18.9508	14.0883	19.8991				5.87453			5.51147	5.15831	5.33489	0.249718
0.0616667	18.924	14.0977	19.6691				5.85013			5.51286	5.16707	5.33996	0.244513
0.0620833	18.874	14.054	19.308				5.86066			5.51116	5.17433	5.34275	0.238171
0.0625	18.8024	13.9449	19.1205				5.89918			5.5153	5.18552	5.35041	0.233186
0.0629167	18.6175	13.8336	19.2494				5.86935			5.50447	5.18645	5.34546	0.224871
0.0633333	18.5444	13.8157	19.5389				5.83456			5.51559	5.18681	5.3512	0.23248
0.06375	18.6106	13.766	19.5424				5.81134			5.52614	5.19113	5.35864	0.236887
0.0641667	18.5015	13.7794	19.2127				5.79206			5.52863	5.19226	5.36044	0.237848
0.0645833	18.5538	13.7107	19.102				5.83605			5.52289	5.19333	5.35811	0.233033
0.065	18.4148	13.6335	19.1866				5.88808			5.53315	5.19736	5.36525	0.237436
0.0654167	18.3749	13.5837	19.2289				5.93233			5.52901	5.20195	5.36548	0.231269
0.0658333	18.3895	13.5676	19.291				5.91724			5.52455	5.20085	5.3627	0.228886
0.06625	18.4371	13.476	18.9319				5.89358			5.5376	5.20114	5.36937	0.237915
0.0666667	18.3136	13.4228	18.6971				5.85496			5.52377	5.20553	5.36465	0.225028
0.0670833	18.2708	13.4	18.5665				5.85173			5.531	5.20655	5.36878	0.229416
0.0675	18.1264	13.3369	18.7427				5.86447			5.53622	5.20874	5.37248	0.231567
0.0679167	18.2477	13.287	18.3474				5.85894			5.53919	5.21019	5.37469	0.232636
0.0683333	17.9589	13.1844	18.4682				5.87723			5.54212	5.20926	5.37569	0.235372
0.06875	18.1049	13.1015	18.4141				5.86231			5.54568	5.21167	5.37867	0.236179
0.0691667	17.9172	13.0892	18.413				5.80888			5.54887	5.21673	5.3828	0.234858
0.0695833	18.014	13.0669	18.252				5.82236			5.5437	5.21984	5.38177	0.229004
0.07	17.9969	13.0299	18.0554				5.81669			5.54932	5.21947	5.38439	0.23324
0.0704167	17.9375	12.9552	18.0144				5.82387			5.55219	5.22455	5.38837	0.23168
0.0708333	17.8097	12.8943	18.0512				5.84321			5.55402	5.21862	5.38632	0.237162
0.07125	17.7606	12.8446	17.9454				5.79887			5.54557	5.2204	5.38298	0.229926
0.0716667	17.796	12.8026	17.8337				5.7757			5.53464	5.22724	5.38094	0.217367
0.0720833	17.76	12.7481	18.0302				5.79606			5.53697	5.22879	5.38288	0.217919
0.0725	17.6947	12.7056	17.9806				5.81196			5.54697	5.23059	5.38878	0.223718
0.0729167	17.5282	12.7194	18.0243				5.78468			5.55793	5.23276	5.39535	0.229932
0.0733333	17.5227	12.81	18.0518				5.75769			5.55885	5.23693	5.39789	0.227632
0.07375	17.5068	12.7812	17.779				5.73865			5.55394	5.23925	5.39659	0.222522
0.0741667	17.5365	12.732	17.6713				5.76632			5.55641	5.24019	5.3983	0.223602
0.0745833	17.4739	12.7477	17.5625				5.72949			5.55025	5.24666	5.39846	0.21467
0.075	17.3562	12.7278	17.5942				5.74851			5.55327	5.24627	5.39977	0.217087
0.0754167	17.3621	12.6129	17.4079				5.73019			5.5562	5.2421	5.39915	0.222103
0.0758333	17.3669	12.5855	17.2825				5.76365			5.55624	5.24063	5.39844	0.22317
0.07625	17.3215	12.5814	17.1833				5.74897			5.56154	5.24271	5.40212	0.225441
0.0766667	17.2922	12.4952	17.3733				5.74502			5.56474	5.24486	5.4048	0.226194
0.0770833	17.2429	12.4013	17.3474				5.72049			5.56434	5.24652	5.40543	0.224733
0.0775	17.1815	12.3584	17.3095				5.72292			5.56816	5.24457	5.40636	0.22881
0.0779167	17.1775	12.3332	17.228				5.75779			5.57034	5.24736	5.40885	0.22838
0.0783333	17.0882	12.238	17.1963				5.73711			5.56154	5.2505	5.40602	0.219944
0.07875	17.0435	12.1992	16.781				5.7646			5.56502	5.2563	5.41066	0.2183
0.0791667	16.964	12.2308	16.7437				5.76305			5.56667	5.25307	5.40987	0.221755
0.0795833	16.9393	12.2171	16.6654				5.76446			5.56309	5.25469	5.40889	0.21807
0.08	17.1447	12.1945	16.8051				5.72023			5.57143	5.25571	5.41357	0.223254
0.0804167	17.03	12.1465	16.7224				5.69838			5.57035	5.25478	5.41256	0.223143
0.0808333	17.0086	12.1213	16.7032				5.71931			5.57275	5.25454	5.41364	0.225009
0.08125	16.8224	12.0776	16.6386				5.71007			5.57211	5.25271	5.41241	0.225853
0.0816667	16.8513	12.0527	16.802				5.74601			5.56717	5.25914	5.41315	0.217814
0.0820833	16.6432	11.9768	16.6604				5.71545			5.5781	5.25681	5.41746	0.227193
0.0825	16.618	11.8668	16.5761				5.75473			5.57426	5.25743	5.41585	0.224028
0.0829167	16.7081	11.8435	16.4596				5.73655			5.57229	5.25603	5.41416	0.223627
0.0833333	16.6156	11.8316	16.3456				5.7148			5.57357	5.26148	5.41752	0.220685
0.08375	16.6235	11.8203	16.2375				5.73411			5.57057	5.26737	5.41897	0.214396
0.0841667	16.5258	11.8395	16.0668				5.7134			5.56754	5.27305	5.42029	0.208233
0.0845833	16.491	11.8186	16.2522				5.73463			5.57631	5.27629	5.4263	0.212148
0.085	16.4749	11.8303	15.9189				5.67558			5.58019	5.2794	5.42979	0.212689
0.0854167	16.3664	11.7972	15.7934				5.64117			5.57749	5.28227	5.42988	0.208747
0.0858333	16.3996	11.758	15.564				5.62272			5.58162	5.28295	5.43228	0.21119
0.08625	16.3426	11.6545	15.7224				5.65241			5.58498	5.28404	5.43451	0.212798
0.0866667	16.3326	11.596	15.5652				5.69877			5.59258	5.28527	5.43892	0.217303
0.0870833	16.4161	11.6009	15.3118				5.68056			5.58771	5.28886	5.43829	0.211319
0.0875	16.3523	11.6121	15.6336				5.68105			5.59297	5.29017	5.44157	0.214113
0.0879167	16.2639	11.6104	15.6105				5.65794			5.58653	5.29757	5.44205	0.204325
0.0883333	16.266	11.5369	15.6915				5.66224			5.59359	5.29752	5.44555	0.209352
0.08875	16.2542	11.5783	15.6883				5.67396			5.59323	5.30164	5.44744	0.206189
0.0891667	16.1999	11.5356	15.679				5.69603			5.59125	5.30853	5.44989	0.199911
0.0895833	16.1649	11.564	15.5141				5.69855			5.59566	5.31121	5.45343	0.201137
0.09	16.1555	11.5152	15.4983				5.70313			5.59337	5.31066	5.45202	0.199906
0.0904167	16.1042	11.4465	15.5743				5.69922			5.59239	5.31497	5.45368	0.196168
0.0908333	16.0923	11.4354	15.5097				5.70312			5.60096	5.32507	5.46301	0.195086
0.09125	16.0239	11.3939	15.3835				5.71997			5.60882	5.32522	5.46702	0.200534
0.0916667	16.0715	11.4025	15.1763				5.71597			5.60891	5.32401	5.46646	0.201452
0.0920833	15.9857	11.3796	15.1114				5.73578			5.6156	5.32236	5.46898	0.207351
0.0925	15.9568	11.2875	15.1247				5.73654			5.61056	5.32387	5.46721	0.20272
0.0929167	15.9636	11.1061	15.1335				5.81202			5.61018	5.32789	5.46903	0.199614
0.0933333	15.9049	11.0402	15.2067				5.78512			5.60604	5.32345	5.46474	0.199818
0.09375	15.877	11.0152	15.3009				5.75558			5.60971	5.31862	5.46417	0.205832
0.0941667	16.0104	10.9903	15.1401				5.74109			5.60825	5.32734	5.4678	0.198637
0.0945833	15.873	10.9771	15.0051				5.76209			5.61968	5.3358	5.47774	0.200734
0.095	15.8108	11.0147	15.2085				5.74946			5.61413	5.32987	5.472	0.201
0.0954167	15.7535	11.1275	15.0143				5.75275			5.61165	5.32584	5.46874	0.202094
0.0958333	15.7632	11.0731	14.911				5.76539			5.6137	5.33284	5.47327	0.198598
0.09625	15.6653	11.0194	14.8284				5.72411			5.6185	5.34176	5.48013	0.195687
0.0966667	15.6545	10.9874	14.8397				5.69837			5.6229	5.34255	5.48273	0.198236
0.0970833	15.5216	10.9924	14.844				5.69187			5.6226	5.35531	5.48896	0.189008
0.0975	15.6147	10.9916	14.7542				5.73566			5.62941	5.35225	5.49083	0.195981
0.0979167	15.5684	10.9463	14.6998				5.74966			5.63127	5.35809	5.49468	0.193168
0.0983333	15.6307	10.8955	14.6915				5.76264			5.62679	5.365	5.4959	0.185118
0.09875	15.5584	10.7967	14.7769				5.76385			5.6853	5.37742	5.53136	0.217708
0.0991667	15.4728	10.768	14.6541				5.78857			5.70602	5.39055	5.54829	0.223072
0.0995833	15.5727	10.7245	14.5488				5.7882			5.69514	5.3913	5.54322	0.214844
0.1	15.4707	10.7154	14.4977				5.95665			5.03919	5.39608	5.21763	0.252356
0.100417	15.5531	10.673	14.4892				6.22403			5.65055	5.39217	5.52136	0.182707
0.100833	15.4185	10.6699	14.4339				6.01579			7.97082	5.39328	6.68205	1.8226
0.10125	15.3814	10.7235	14.3293				5.67005			5.79361	5.39945	5.59653	0.27871
0.101667	15.4116	10.6724	14.1871				5.64064			5.34691	5.63537	5.49114	0.203971
0.102083	15.3878	10.6337	14.0548				5.60499			5.12633	5.20235	5.16434	0.0537539
0.1025	15.349	10.6662	14.2066				5.65817			4.9975	5.0302	5.01385	0.0231233
0.102917	15.3036	10.6419	14.1959				5.63116			4.90964	4.92972	4.91968	0.014197
0.103333	15.3327	10.6781	14.0647				5.60401			4.84516	4.85633	4.85075	0.00789939
0.10375	15.428	10.7124	13.9662				5.50239			4.7769	4.81481	4.79586	0.0268134
0.104167	15.27	10.678	13.8369				5.43888			4.73341	4.77711	4.75526	0.0309027
0.104583	15.2829	10.7116	13.813				5.45418			4.70895	4.75367	4.73131	0.0316228
0.105	15.276	10.7136	13.7139				5.43541			4.6751	4.75272	4.71391	0.0548892
0.105417	15.2064	10.6882	13.6471				5.34389			4.63676	4.75211	4.69443	0.0815641
0.105833	15.1079	10.5922	13.6275				5.30819			4.61619	4.74002	4.67811	0.0875619
0.10625	15.5324	10.5516	13.5385				5.24442			4.60564	4.72304	4.66434	0.0830165
0.106667	15.6137	10.554	13.3343				5.25551			4.59688	4.70337	4.65012	0.0753015
0.107083	15.5824	10.5707	13.1526				5.22702			4.57867	4.69769	4.63818	0.0841599
0.1075	15.4608	10.5911	13.0066				5.22125			4.56664	4.68837	4.6275	0.0860809
0.107917	15.3681	10.5772	12.9001				5.1608			4.54996	4.67484	4.6124	0.0883044
0.108333	15.3196	10.5498	12.8349				5.09482			4.54268	4.65782	4.60025	0.0814168
0.10875	15.2267	10.5225	12.74				5.14665			4.52798	4.64967	4.58882	0.0860528
0.109167	15.1086	10.516	12.6475				5.11577			4.52164	4.64041	4.58102	0.0839804
0.109583	15.0489	10.5848	12.6212				5.10559			4.51168	4.63925	4.57547	0.0902089
0.11	15.1717	10.516	12.488				4.99315			4.50174	4.61489	4.55831	0.0800108
0.110417	15.0741	10.4823	12.4968				5.00819			4.50543	4.61812	4.56178	0.0796795
0.110833	15.0779	10.4807	12.5219				4.9999			4.50872	4.60828	4.5585	0.0704039
0.11125	15.03	10.4547	12.4659				4.98057			4.50796	4.61287	4.56042	0.0741821
0.111667	15.0113	10.4353	12.4392				4.93545			4.50165	4.60281	4.55223	0.0715307
0.112083	15.0464	10.464	12.4608				4.90889			4.48875	4.58206	4.5354	0.0659798
0.1125	14.955	10.3671	12.4901				4.84382			4.4817	4.57062	4.52616	0.0628765
0.112917	14.9481	10.3809	12.3203				4.8233			4.49457	4.56815	4.53136	0.0520284
0.113333	14.8815	10.3202	12.23				4.82067			4.48201	4.56752	4.52477	0.0604689
0.11375	14.863	10.3248	12.2348				4.78033			4.48379	4.56427	4.52403	0.0569091
0.114167	14.8723	10.3632	12.1748				4.74933			4.46894	4.56137	4.51516	0.065358
0.114583	14.8303	10.3003	12.145				4.70471			4.46544	4.55304	4.50924	0.0619424
0.115	14.7616	10.2799	12.2063				4.7399			4.47353	4.5388	4.50617	0.0461567
0.115417	14.7263	10.2078	12.0761				4.72376			4.47356	4.53464	4.5041	0.0431893
0.115833	14.7666	10.1644	11.974				4.71912			4.47827	4.5219	4.50009	0.0308556
0.11625	14.6838	10.1624	11.9428				4.71541			4.46404	4.51822	4.49113	0.038315
0.116667	14.6443	10.1348	12.1764				4.68028			4.43946	4.50934	4.4744	0.0494167
0.117083	14.5595	10.1146	11.9958				4.6663			4.46361	4.49637	4.47999	0.0231675
0.1175	14.6045	10.1379	11.9034				4.61614			4.45787	4.49273	4.4753	0.0246503
0.117917	14.5827	10.0981	11.912				4.55125			4.47557	4.48933	4.48245	0.00972594
0.118333	14.4962	10.1061	11.8075				4.57997			4.47778	4.47506	4.47642	0.00192522
0.11875	14.4855	10.1099	11.768				4.59063			4.46297	4.46393	4.46345	0.000680391
0.119167	14.2749	10.085	12.1852				4.57609			4.45253	4.46214	4.45734	0.00679771
0.119583	14.1635	10.1282	11.8509				4.52048			4.45212	4.45652	4.45432	0.00311178
0.12	14.0952	10.1122	11.7411				4.57078			4.46698	4.4489	4.45794	0.0127836
0.120417	14.0958	10.118	11.752				4.5068			4.4706	4.4539	4.46225	0.0118106
0.120833	14.021	10.0166	11.7598				4.49652			4.46423	4.45131	4.45777	0.00913949
0.12125	14.0165	9.98956	11.7291				4.47757			4.46518	4.44393	4.45455	0.0150247
0.121667	13.9643	9.98219	11.6931				4.46664			4.46919	4.44409	4.45664	0.0177474
0.122083	13.904	9.99469	11.7596				4.46629			4.46766	4.44073	4.45419	0.0190381
0.1225	13.9102	9.90748	11.707				4.5046			4.45359	4.42546	4.43952	0.0198853
0.122917	13.8516	9.931	11.6929				4.43958			4.44532	4.41339	4.42935	0.0225794
0.123333	13.7576	9.90882	11.7829				4.39534			4.45043	4.40669	4.42856	0.0309256
0.12375	13.6655	9.88615	11.7308				4.36063			4.44892	4.39491	4.42191	0.0381943
0.124167	13.6962	9.85127	11.637				4.35541			4.43774	4.3981	4.41792	0.0280304
0.124583	13.6633	9.80019	11.5474				4.36469			4.42953	4.40056	4.41505	0.0204888
0.125	13.6242	9.80791	11.5197				4.2929			4.2091	4.20092	4.20501	0.0057843
0.125417	13.5623	9.8378	11.4482				4.27251			4.00997	3.94361	3.97679	0.0469262
0.125833	13.6418	9.87775	11.4582				4.26289			3.88306	3.79611	3.83959	0.0614828
0.12625	13.6165	9.87315	11.3763				4.2449			3.80079	3.67607	3.73843	0.0881938
0.126667	13.5969	9.80297	11.3919				4.22675			3.7369	3.57586	3.65638	0.113875
0.127083	13.5518	9.77304	11.4059				4.20394			3.67066	3.4945	3.58258	0.124564
0.1275	13.4894	9.82114	11.3686				4.14034			3.61633	3.42295	3.51964	0.136741
0.127917	13.5837	9.79797	11.2708				4.18095			3.57444	3.36115	3.4678	0.150818
0.128333	13.5178	9.75643	11.2078				4.20171			3.53471	3.31119	3.42295	0.158049
0.12875	13.5494	9.65836	11.2528				4.18685			3.49627	3.2671	3.38168	0.162053
0.129167	13.5333	9.72111	11.1566				4.14978			3.46302	3.23059	3.34681	0.164353
0.129583	13.4876	9.6915	11.1593				4.16366			3.43635	3.19825	3.3173	0.168363
0.13	13.383	9.69017	11.2214				4.15696			3.4066	3.16698	3.28679	0.169432
0.130417	13.3623	9.66049	11.1482				4.14675			3.3895	3.1411	3.2653	0.175645
0.130833	13.3759	9.63484	11.0935				4.14091			3.37924	3.12266	3.25095	0.181432
0.13125	13.4038	9.64258	11.0851				4.14567			3.35989	3.10445	3.23217	0.18062
0.131667	13.3209	9.67669	11.178				4.09043			3.3367	3.0868	3.21175	0.176708
0.132083	13.304	9.65448	11.112				4.09741			3.32584	3.07317	3.19951	0.178664
0.1325	13.3095	9.59384	11.0786				4.10081			3.31241	3.0621	3.18726	0.176996
0.132917	13.2476	9.52758	10.9965				4.14046			3.30136	3.04734	3.17435	0.179615
0.133333	13.3409	9.56266	10.9722				4.11498			3.28998	3.03718	3.16358	0.178758
0.13375	13.3185	9.43379	10.9236				4.15589			3.27798	3.02781	3.1529	0.176894
0.134167	13.237	9.44096	10.9853				4.19322			3.27538	3.02052	3.14795	0.180217
0.134583	13.2347	9.54919	10.9265				4.23187			3.27182	3.01509	3.14345	0.181535
0.135	13.2375	9.50131	10.9469				4.22284			3.26641	3.00924	3.13782	0.181842
0.135417	13.198	9.452	10.8953				4.17557			3.25589	3.00544	3.13066	0.17709
0.135833	13.1454	9.39395	10.8501				4.16203			3.25058	3.00055	3.12557	0.176795
0.13625	13.106	9.37793	10.8702				4.17519			3.24778	2.9968	3.12229	0.177471
0.136667	13.1432	9.34361	10.8564				4.19216			3.24297	2.99328	3.11812	0.176552
0.137083	13.1548	9.35772	10.8443				4.21121			3.23881	2.98982	3.11432	0.176062
0.1375	13.15	9.40729	10.8333				4.21713			3.23333	2.98684	3.11008	0.174292
0.137917	13.1241	9.38764	10.8547				4.16012			3.23113	2.98377	3.10745	0.174913
0.138333	13.0644	9.37185	10.8884				4.19985			3.23261	2.98319	3.1079	0.176365
0.13875	13.0703	9.36664	10.8174				4.17712			3.2306	2.98327	3.10693	0.174886
0.139167	13.0748	9.3027	10.8964				4.20543			3.22512	2.98114	3.10313	0.172522
0.139583	13.0263	9.2969	10.9356				4.18535			3.22568	2.97975	3.10272	0.173896
0.14	13.0384	9.35094	10.7873				4.25436			3.2272	2.97886	3.10303	0.175606
0.140417	13.0323	9.40036	10.7058				4.2233			3.23093	2.97845	3.10469	0.178526
0.140833	12.9714	9.37152	10.732				4.22379			3.22773	2.98024	3.10398	0.175001
0.14125	12.9705	9.3527	10.7661				4.19663			3.23543	2.97925	3.10734	0.181147
0.141667	12.9741	9.37828	10.6844				4.20904			3.23952	2.97956	3.10954	0.183819
0.142083	12.9685	9.34938	10.7048				4.18194			3.2335	2.97992	3.10671	0.179305
0.1425	12.9905	9.31492	10.7223				4.14518			3.23216	2.98253	3.10734	0.176519
0.142917	12.925	9.31759	10.6901				4.17947			3.23026	2.98687	3.10856	0.172102
0.143333	12.9783	9.35754	10.6317				4.23607			3.23151	2.98648	3.10899	0.173268
0.14375	12.9275	9.34519	10.6169				4.19239			3.22891	2.98637	3.10764	0.171506
0.144167	12.8566	9.29672	10.6282				4.13823			3.21975	2.98825	3.104	0.163697
0.144583	12.8675	9.24976	10.6547				4.16039			3.21931	2.99035	3.10483	0.161899
0.145	12.8914	9.2234	10.5983				4.14755			3.21442	2.99197	3.1032	0.157291
0.145417	12.7884	9.1626	10.6307				4.1664			3.2217	2.99176	3.10673	0.162594
0.145833	12.7849	9.19859	10.6265				4.14973			3.21379	2.99534	3.10456	0.154468
0.14625	12.7799	9.19044	10.514				4.18006			3.2141	2.99701	3.10555	0.153505
0.146667	12.7983	9.21287	10.5651				4.21154			3.21395	2.99884	3.1064	0.152106
0.147083	12.8006	9.17874	10.6965				4.18222			3.21293	2.99934	3.10613	0.151032
0.1475	12.891	9.1874	10.627				4.16816			3.21011	3.00347	3.10679	0.14612
0.147917	12.8098	9.18215	10.6109				4.15818			3.2108	3.00572	3.10826	0.145013
0.148333	12.7993	9.23489	10.5292				4.14573			3.20858	3.00807	3.10833	0.141782
0.14875	12.7931	9.24623	10.4772				4.17865			3.21305	3.01126	3.11215	0.142687
0.149167	12.8429	9.21665	10.4603				4.14854			3.221	3.01208	3.11654	0.147731
0.149583	12.7947	9.16967	10.5374				4.16308			3.21744	3.01457	3.11601	0.14345
0.15	12.803	9.18582	10.5419				4.12641			3.22496	3.01615	3.12055	0.147651
0.150417	12.7932	9.18142	10.5282				4.11993			3.22682	3.01687	3.12185	0.148458
0.150833	12.7398	9.16313	10.4945				4.13203			3.23233	3.01894	3.12563	0.150889
0.15125	12.7846	9.20061	10.4692				4.15356			3.23338	3.02249	3.12793	0.149119
0.151667	12.8314	9.18943	10.446				4.12861			3.23116	3.02532	3.12824	0.14555
0.152083	12.7754	9.14182	10.4853				4.11893			3.23288	3.02869	3.13078	0.144379
0.1525	12.8548	9.19261	10.4978				4.14173			3.23001	3.03243	3.13122	0.139709
0.152917	12.8425	9.21535	10.4297				4.14648			3.23316	3.03469	3.13392	0.140342
0.153333	12.8183	9.24361	10.5099				4.13584			3.2379	3.0364	3.13715	0.142486
0.15375	12.8287	9.2542	10.5597				4.08862			3.24469	3.03762	3.14115	0.146418
0.154167	12.7774	9.27582	10.5033				4.09507			3.24477	3.04123	3.143	0.143921
0.154583	12.8453	9.31487	10.5071				4.08322			3.24752	3.04492	3.14622	0.143262
0.155	12.8495	9.28119	10.4718				4.0662			3.25543	3.04869	3.15206	0.146184
0.155417	12.8215	9.28561	10.439				4.08603			3.26292	3.05087	3.15689	0.149941
0.155833	12.7837	9.33919	10.4597				4.13996			3.25932	3.05594	3.15763	0.143808
0.15625	12.8097	9.39064	10.5078				4.14856			3.26156	3.06037	3.16097	0.142262
0.156667	12.7276	9.32609	10.7703				4.15883			3.26072	3.06337	3.16205	0.139552
0.157083	12.7586	9.28775	10.7027				4.13196			3.26466	3.06476	3.16471	0.141355
0.1575	12.7077	9.26625	10.6932				4.09898			3.27061	3.068	3.16931	0.143267
0.157917	12.6625	9.31856	10.6895				4.11435			3.276	3.06921	3.1726	0.146227
0.158333	12.7254	9.32942	10.609				4.13287			3.28042	3.07425	3.17733	0.145787
0.15875	12.7505	9.37988	10.6544				4.17496			3.28078	3.07683	3.1788	0.144217
0.159167	12.6912	9.39263	10.6172				4.12537			3.28227	3.08089	3.18158	0.142392
0.159583	12.7619	9.34884	10.641				4.12641			3.28392	3.0835	3.18371	0.141718
0.16	12.691	9.24068	10.6038				4.14464			3.2855	3.09	3.18775	0.138238
0.160417	12.6371	9.16215	10.6132				4.11052			3.28831	3.09428	3.1913	0.137197
0.160833	12.6814	9.13274	10.5527				4.06525			3.29481	3.0973	3.19606	0.139657
0.16125	12.6207	9.12291	10.5176				4.09857			3.29783	3.10253	3.20018	0.138098
0.161667	12.6107	9.14967	10.4805				4.07329			3.29773	3.1043	3.20101	0.136774
0.162083	12.6631	9.14639	10.4168				4.04144			3.29808	3.10943	3.20375	0.1334
0.1625	12.6634	9.06385	10.5074				3.99845			3.29608	3.11157	3.20382	0.130468
0.162917	12.6524	9.08786	10.5265				4.04012			3.2928	3.11378	3.20329	0.126581
0.163333	12.6117	9.01684	10.4815				4.07818			3.29483	3.11891	3.20687	0.124394
0.16375	12.6278	9.00984	10.4778				4.03481			3.29532	3.12188	3.2086	0.122642
0.164167	12.6447	9.0072	10.4428				4.04418			3.29854	3.12559	3.21206	0.122291
0.164583	12.6115	9.0228	10.546				4.01834			3.2928	3.12933	3.21107	0.115585
0.165	12.6127	8.99791	10.5432				4.03678			3.30176	3.13175	3.21675	0.120211
0.165417	12.5627	9.01474	10.5794				4.09689			3.29882	3.13374	3.21628	0.116736
0.165833	12.5436	9.1094	10.6371				4.08619			3.30529	3.13666	3.22098	0.119236
0.16625	12.5565	9.25937	10.609				4.06314			3.30003	3.14219	3.22111	0.111605
0.166667	12.5593	9.25985	10.6587				4.09072			3.30296	3.14634	3.22465	0.110746
0.167083	12.6323	9.27257	10.5995				4.04689			3.29572	3.14705	3.22139	0.105127
0.1675	12.5887	9.31833	10.5865				4.01846			3.29421	3.15236	3.22329	0.100301
0.167917	12.6318	9.37002	10.5822				4.02435			3.29365	3.15798	3.22582	0.0959363
0.168333	12.5567	9.38959	10.5416				4.04503			3.29787	3.15948	3.22868	0.0978588
0.16875	12.5739	9.38556	10.4933				3.99886			3.29702	3.16066	3.22884	0.0964185
0.169167	12.5244	9.39053	10.5622				4.01353			3.29926	3.1666	3.23293	0.0938044
0.169583	12.483	9.3785	10.5385				4.01738			3.30085	3.16776	3.2343	0.0941139
0.17	12.5437	9.33852	10.5354				3.9737			3.292	3.17016	3.23108	0.0861561
0.170417	12.5778	9.35524	10.5704				4.01766			3.29365	3.17272	3.23319	0.0855154
0.170833	12.5325	9.31042	10.5192				4.00965			3.29287	3.1746	3.23374	0.0836305
0.17125	12.534	9.30168	10.4771				4.00014			3.29605	3.1774	3.23673	0.0838973
0.171667	12.5662	9.27072	10.4854				4.04132			3.29777	3.18251	3.24014	0.0815033
0.172083	12.5826	9.289	10.5101				4.00233			3.29295	3.1914	3.24217	0.0718052
0.1725	12.6707	9.39424	10.5749				4.02385			3.29531	3.18993	3.24262	0.0745123
0.172917	12.6701	9.44312	10.5352				4.00093			3.29893	3.19519	3.24706	0.0733548
0.173333	12.6739	9.49478	10.5447				3.9612			3.29617	3.19664	3.24641	0.0703794
0.17375	12.6168	9.5102	10.9977				3.9744			3.2983	3.20224	3.25027	0.0679221
0.174167	12.6226	9.6322	11.0416				3.96919			3.29768	3.20661	3.25215	0.0643987
0.174583	12.7103	9.61383	11.0621				3.96009			3.29103	3.20592	3.24848	0.0601812
0.175	12.6166	9.65638	10.9537				4.00875			3.29516	3.21061	3.25288	0.0597901
0.175417	12.6221	9.73766	10.8757				4.05724			3.29597	3.2136	3.25479	0.0582504
0.175833	12.5841	9.80054	10.8533				4.08746			3.29634	3.21732	3.25683	0.0558786
0.17625	12.6113	9.80156	10.877				4.07023			3.29875	3.22291	3.26083	0.0536271
0.176667	12.561	9.75645	10.8433				4.07019			3.29833	3.22199	3.26016	0.0539829
0.177083	12.5747	9.6574	10.7963				4.06365			3.29484	3.22738	3.26111	0.0476978
0.1775	12.5832	9.65829	10.7745				4.10302			3.29943	3.23246	3.26595	0.0473577
0.177917	12.5779	9.59878	10.6855				4.08737			3.29969	3.23533	3.26751	0.0455057
0.178333	12.566	9.61274	10.6893				4.09824			3.29869	3.2367	3.26769	0.0438274
0.17875	12.5588	9.68451	10.7283				4.13529			3.30248	3.24363	3.27306	0.0416115
0.179167	12.6465	9.71971	10.7541				4.13017			3.29899	3.24636	3.27267	0.0372148
0.179583	12.6885	9.77159	10.76				4.13367			3.30273	3.25205	3.27739	0.0358306
0.18	12.6427	9.68923	10.7141				4.1288			3.30198	3.25363	3.27781	0.0341885
0.180417	12.7006	9.66215	10.5738				4.15162			3.30703	3.25611	3.28157	0.0360059
0.180833	12.6469	9.70785	10.4728				4.17253			3.3141	3.25637	3.28524	0.0408201
0.18125	12.6739	9.67881	10.4774				4.13863			3.31253	3.26151	3.28702	0.0360782
0.181667	12.6949	9.6492	10.5273				4.16006			3.31451	3.26557	3.29004	0.0346046
0.182083	12.7098	9.6762	10.6093				4.12151			3.31124	3.27335	3.29229	0.0267903
0.1825	12.6071	9.7367	10.6124				4.17788			3.30948	3.27793	3.2937	0.0223075
0.182917	12.5785	9.79588	10.5403				4.17255			3.31431	3.27899	3.29665	0.0249697
0.183333	12.6336	9.81485	10.512				4.12313			3.31257	3.28471	3.29864	0.0197006
0.18375	12.6598	9.83361	10.4683				4.14276			3.30982	3.28853	3.29918	0.0150553
0.184167	12.6753	9.94262	10.5273				4.14278			3.31358	3.29153	3.30256	0.0155893
0.184583	12.6167	9.99468	10.583				4.15143			3.31192	3.29509	3.30351	0.0118969
0.185	12.58	10.0138	10.545				4.18857			3.31788	3.30178	3.30983	0.0113793
0.185417	12.594	10.0188	10.562				4.21572			3.32043	3.30471	3.31257	0.0111167
0.185833	12.6155	10.0204	10.6252				4.22081			3.32183	3.30685	3.31434	0.0105936
0.18625	12.6998	9.98335	10.62				4.19389			3.32252	3.30977	3.31614	0.00901483
0.186667	12.7058	10.0952	10.5301				4.24664			3.32973	3.31441	3.32207	0.0108279
0.187083	12.7193	10.15	10.5417				4.25726			3.32978	3.31983	3.3248	0.00702965
0.1875	12.8044	10.1997	10.6225				4.29289			3.32424	3.32301	3.32363	0.000869388
0.187917	12.7534	10.1664	10.5843				4.24817			3.32347	3.32483	3.32415	0.000958325
0.188333	12.6991	10.1059	10.6528				4.21706			3.32573	3.32782	3.32678	0.00148014
0.18875	12.6735	10.0942	10.5873				4.23984			3.32749	3.33245	3.32997	0.00351078
0.189167	12.6365	10.1402	10.5259				4.25393			3.32815	3.33498	3.33157	0.00483205
0.189583	12.6079	10.1399	10.6276				4.24282			3.33193	3.33983	3.33588	0.00559183
0.19	12.6409	10.0918	10.5744				4.22174			3.33389	3.3438	3.33885	0.00700551
0.190417	12.6499	10.0845	10.5581				4.23757			3.33901	3.34498	3.342	0.00421847
0.190833	12.6753	10.195	10.6515				4.24743			3.34038	3.34988	3.34513	0.00671462
0.19125	12.7016	10.2003	10.7171				4.26108			3.34902	3.35504	3.35203	0.00426007
0.191667	12.76	10.2326	10.7634				4.21345			3.34987	3.35708	3.35347	0.00510161
0.192083	12.7185	10.1428	10.7982				4.17138			3.35077	3.36084	3.35581	0.0071197
0.1925	12.6809	10.0737	10.9531				4.18505			3.3554	3.36001	3.3577	0.00325691
0.192917	12.7112	10.1905	10.9491				4.21318			3.35037	3.36545	3.35791	0.010665
0.193333	12.7017	10.2122	10.9939				4.16128			3.35747	3.36755	3.36251	0.00712785
0.19375	12.7898	10.1897	10.9793				4.16795			3.36585	3.37131	3.36858	0.00386052
0.194167	12.8294	10.2611	10.931				4.12184			3.36684	3.37735	3.37209	0.00742972
0.194583	12.8314	10.2256	11.0595				4.17564			3.37235	3.38104	3.37669	0.00614028
0.195	12.8575	10.295	10.7703				4.1865			3.37527	3.3858	3.38053	0.00744325
0.195417	12.9073	10.3342	10.6722				4.1239			3.37856	3.38837	3.38346	0.00693661
0.195833	12.905	10.3696	10.7096				4.11154			3.38085	3.39328	3.38707	0.00879039
0.19625	12.8423	10.4078	10.7264				4.14025			3.38477	3.39678	3.39078	0.00849506
0.196667	12.8346	10.4328	10.6922				4.15466			3.38944	3.40034	3.39489	0.00771134
0.197083	12.9635	10.3916	10.7944				4.1321			3.39426	3.40573	3.39999	0.00811029
0.1975	12.9731	10.3075	10.7079				4.13591			3.397	3.4101	3.40355	0.00926231
0.197917	12.9041	10.3784	10.8444				4.15757			3.39986	3.41105	3.40545	0.00791387
0.198333	12.8739	10.4781	10.9143				4.15107			3.40929	3.4138	3.41154	0.00319043
0.19875	12.9277	10.4282	10.7693				4.09548			3.41353	3.41741	3.41547	0.00274175
0.199167	12.9349	10.325	10.638				4.11433			3.4129	3.42088	3.41689	0.00564467
0.199583	12.9381	10.3639	10.6061				4.1324			3.41252	3.42523	3.41887	0.00899166
0.2	12.9192	10.3726	10.6212				4.11003			3.41474	3.42963	3.42219	0.0105297
0.200417	12.9192	10.4126	10.6121				4.07888			3.41463	3.43193	3.42328	0.0122283
0.200833	13.0075	10.394	10.5413				4.1443			3.41745	3.43519	3.42632	0.0125406
0.20125	12.9696	10.3221	10.6588				4.1112			3.42573	3.44171	3.43372	0.0113011
0.201667	12.8938	10.4129	10.7085				4.07839			3.42482	3.44452	3.43467	0.0139315
0.202083	12.9479	10.3495	10.6757				4.13061			3.42936	3.44994	3.43965	0.0145532
0.2025	12.9636	10.4281	10.7026				4.11641			3.43292	3.45321	3.44307	0.0143519
0.202917	13.0088	10.3428	10.6367				4.14949			3.43925	3.45716	3.44821	0.012661
0.203333	13.0422	10.2993	10.6854				4.1389			3.43896	3.46238	3.45067	0.0165594
0.20375	13.0181	10.2312	10.7134				4.10144			3.43979	3.46632	3.45305	0.0187622
0.204167	13.0235	10.4607	10.6719				4.08894			3.44553	3.46983	3.45768	0.0171847
0.204583	13.0244	10.5157	10.7792				4.09167			3.44861	3.4757	3.46216	0.0191565
0.205	13.006	10.5165	10.7134				4.1401			3.45441	3.47583	3.46512	0.0151473
0.205417	12.9061	10.5363	10.7086				4.1215			3.45477	3.48057	3.46767	0.018241
0.205833	13.0206	10.6111	11.1683				4.12987			3.45684	3.48004	3.46844	0.0163988
0.20625	13.0464	10.6948	11.5245				4.14356			3.4569	3.48285	3.46988	0.0183504
0.206667	13.0554	10.7267	11.5045				4.14103			3.46119	3.49126	3.47622	0.0212612
0.207083	13.0622	10.6997	11.4716				4.12582			3.46285	3.49149	3.47717	0.0202529
0.2075	13.1447	10.6174	11.417				4.19075			3.4653	3.49597	3.48063	0.0216832
0.207917	13.1523	10.5461	11.3478				4.17286			3.46124	3.50064	3.48094	0.0278602
0.208333	13.1232	10.5265	11.1848				4.17176			3.46589	3.49881	3.48235	0.0232792
0.20875	13.2123	10.5122	11.0652				4.21864			3.46813	3.50481	3.48647	0.0259375
0.209167	13.2693	10.5658	11.0747				4.20031			3.46882	3.50583	3.48732	0.0261744
0.209583	13.2587	10.6301	11.0594				4.25143			3.47327	3.51028	3.49177	0.0261732
0.21	13.3292	10.7017	10.9359				4.21838			3.46795	3.51234	3.49014	0.0313878
0.210417	13.2766	10.8455	11.006				4.19905			3.46998	3.52021	3.4951	0.0355177
0.210833	13.2498	10.9132	10.9606				4.20884			3.47318	3.52316	3.49817	0.035344
0.21125	13.2914	10.7813	10.9776				4.24594			3.47663	3.52791	3.50227	0.0362656
0.211667	13.3067	10.7351	11.0802				4.26006			3.4779	3.52866	3.50328	0.0358884
0.212083	13.3631	10.8194	11.236				4.25394			3.47797	3.53229	3.50513	0.0384051
0.2125	13.3321	10.9101	11.3263				4.2767			3.4776	3.53603	3.50681	0.0413144
0.212917	13.4414	11.0152	11.4448				4.31218			3.48248	3.54128	3.51188	0.0415823
0.213333	13.503	11.007	11.6785				4.3217			3.49084	3.54477	3.51781	0.0381276
0.21375	13.5275	10.9848	11.7442				4.31573			3.49223	3.5445	3.51837	0.0369546
0.214167	13.4946	10.884	11.8683				4.28127			3.49131	3.54639	3.51885	0.0389499
0.214583	13.5234	10.7987	11.8298				4.32806			3.48942	3.55272	3.52107	0.0447588
0.215	13.5158	10.8248	11.6962				4.3152			3.49101	3.55764	3.52433	0.0471164
0.215417	13.5101	10.8571	11.5402				4.29035			3.4938	3.56012	3.52696	0.0468957
0.215833	13.4666	10.855	11.6594				4.33649			3.49978	3.56478	3.53228	0.0459645
0.21625	13.5714	11.0007	11.5952				4.33374			3.50678	3.56599	3.53638	0.0418697
0.216667	13.5804	11.0138	11.6364				4.32466			3.49224	3.57344	3.53284	0.057418
0.217083	13.6569	11.0082	11.8977				4.30507			3.49371	3.5774	3.53555	0.0591786
0.2175	13.5778	11.1193	11.9787				4.283			3.49368	3.57718	3.53543	0.0590453
0.217917	13.6055	11.2115	11.9974				4.31679			3.49762	3.57978	3.5387	0.0580965
0.218333	13.5778	11.1226	12.0305				4.34573			3.49998	3.58119	3.54058	0.0574185
0.21875	13.506	11.1284	12.1517				4.32608			3.50713	3.58358	3.54536	0.0540583
0.219167	13.6158	11.1515	9.96803				4.35496			3.50854	3.59001	3.54928	0.0576063
0.219583	13.6871	11.1366	12.055				4.33654			3.50845	3.59217	3.55031	0.0591999
0.22	13.6714	11.089	12.1175				4.2956			3.51151	3.59763	3.55457	0.0608956
0.220417	13.6226	11.3604	12.0378				4.284			3.51542	3.59769	3.55655	0.0581742
0.220833	13.7288	11.4655	12.0214				4.31877			3.51551	3.60131	3.55841	0.0606653
0.22125	13.7902	11.5076	12.0062				4.34063			3.52173	3.60573	3.56373	0.0593972
0.221667	13.8007	11.4131	12.0496				4.36719			3.5211	3.6076	3.56435	0.0611652
0.222083	13.6947	11.4174	11.9782				4.32454			3.52587	3.61445	3.57016	0.0626404
0.2225	13.7333	11.4794	11.9788				4.34346			3.5287	3.61892	3.57381	0.063791
0.222917	13.767	11.3883	11.8949				4.31811			3.53473	3.62344	3.57909	0.0627263
0.223333	13.8292	11.5035	11.8635				4.27863			3.53985	3.62602	3.58294	0.0609259
0.22375	13.8306	11.5845	11.9228				4.26896			3.54338	3.62965	3.58652	0.0610061
0.224167	13.8548	11.6011	11.831				4.27443			3.54696	3.63286	3.58991	0.0607387
0.224583	13.9151	11.6819	12.029				4.28349			3.5475	3.63492	3.59121	0.0618125
0.225	13.9493	11.6873	11.899				4.27895			3.55087	3.6384	3.59464	0.0618939
0.225417	14.0286	11.7015	11.9711				4.29032			3.55429	3.64022	3.59725	0.0607662
0.225833	14.0052	11.7758	11.9634				4.25422			3.55954	3.64655	3.60304	0.0615237
0.22625	14.0684	11.9594	12.1157				4.24423			3.55954	3.65417	3.60685	0.0669159
0.226667	14.0022	11.9154	12.3388				4.24901			3.56458	3.65515	3.60986	0.06404
0.227083	13.9305	11.7979	12.5151				4.18334			3.56847	3.66037	3.61442	0.0649827
0.2275	13.9935	11.9429	12.555				4.19559			3.57283	3.66294	3.61789	0.0637206
0.227917	14.1059	11.9892	12.6985				4.18769			3.57645	3.66598	3.62121	0.0633084
0.228333	14.0781	12.1026	12.6769				4.21007			3.57461	3.66688	3.62075	0.0652461
0.22875	14.164	12.0684	12.6869				4.15092			3.57989	3.67214	3.62601	0.0652309
0.229167	14.1584	12.1341	12.6503				4.13955			3.58372	3.67549	3.62961	0.0648933
0.229583	14.1412	12.0457	12.6276				4.12858			3.58768	3.67817	3.63293	0.06399
0.23	14.1579	11.9992	12.5852				4.15253			3.59152	3.68071	3.63611	0.0630688
0.230417	14.183	12.1402	12.6367				4.12361			3.59646	3.68004	3.63825	0.0591045
0.230833	14.2103	12.0965	12.6928				4.17903			3.59958	3.68773	3.64366	0.0623299
0.23125	14.1804	12.1763	12.9752				4.12059			3.6021	3.6894	3.64575	0.0617329
0.231667	14.1977	12.287	13.1573				4.12808			3.60781	3.69239	3.6501	0.0598023
0.232083	14.2338	12.2089	13.3865				4.15045			3.61301	3.69676	3.65489	0.0592152
0.2325	14.2864	12.2377	13.4166				4.16916			3.61566	3.70024	3.65795	0.0598007
0.232917	14.1966	12.2042	13.479				4.15655			3.61637	3.70433	3.66035	0.0621995
0.233333	14.2997	12.1105	13.2404				4.14362			3.61848	3.70852	3.6635	0.0636705
0.23375	14.3167	12.2754	12.7937				4.14737			3.62659	3.70886	3.66773	0.0581729
0.234167	14.3059	12.2843	12.678				4.16373			3.62981	3.71565	3.67273	0.0606916
0.234583	14.3949	12.1926	12.7134				4.15147			3.63043	3.72105	3.67574	0.0640742
0.235	14.4069	12.2305	12.532				4.12805			3.63196	3.72432	3.67814	0.0653066
0.235417	14.449	12.3516	12.472				4.141			3.63722	3.72905	3.68313	0.0649378
0.235833	14.478	12.4681	12.5485				4.16711			3.63931	3.73014	3.68472	0.0642293
0.23625	14.4883	12.6092	12.7256				4.12088			3.64223	3.73192	3.68707	0.0634245
0.236667	14.4471	12.4285	12.9042				4.11347			3.64126	3.73399	3.68763	0.0655666
0.237083	14.4001	12.2506	13.1047				4.10785			3.64269	3.73757	3.69013	0.0670877
0.2375	14.3926	12.3082	13.2648				4.15683			3.64546	3.74431	3.69489	0.0698974
0.237917	14.4274	12.1441	13.0054				4.14654			3.64936	3.74795	3.69865	0.0697103
0.238333	14.5065	12.1167	12.9581				4.16963			3.65278	3.74654	3.69966	0.0662997
0.23875	14.5658	12.1475	13.1431				4.15899			3.66086	3.74999	3.70542	0.0630289
0.239167	14.6066	12.2119	13.1135				4.17968			3.66305	3.7524	3.70773	0.063183
0.239583	14.5561	12.2903	13.1564				4.18945			3.66846	3.75648	3.71247	0.0622458
0.24	14.5315	12.3171	13.2548				4.19566			3.66948	3.75899	3.71424	0.0632902
0.240417	14.5331	12.4671	13.236				4.22833			3.67031	3.76295	3.71663	0.0655071
0.240833	14.4904	12.71	13.1195				4.23381			3.67346	3.76515	3.71931	0.0648334
0.24125	14.6335	12.8437	13.2994				4.23366			3.67926	3.76698	3.72312	0.0620224
0.241667	14.6463	12.7954	13.2951				4.30907			3.6828	3.77216	3.72748	0.0631824
0.242083	14.7054	12.7231	13.1397				4.30521			3.68649	3.77342	3.72995	0.0614705
0.2425	14.7095	12.7105	13.1367				4.2832			3.68767	3.77284	3.73026	0.0602213
0.242917	14.679	12.7131	13.2747				4.31806			3.68807	3.77277	3.73042	0.0598924
0.243333	14.7956	12.745	13.2383				4.30584			3.6931	3.78143	3.73726	0.0624598
0.24375	14.7331	12.6866	13.1061				4.29869			3.6974	3.78713	3.74226	0.0634498
0.244167	14.6261	12.7571	13.0838				4.28848			3.70336	3.79041	3.74689	0.0615583
0.244583	14.7043	12.774	13.1398				4.30996			3.7025	3.79445	3.74848	0.0650148
0.245	14.7174	12.9226	13.3579				4.348			3.70411	3.79661	3.75036	0.0654059
0.245417	14.6987	12.9471	13.4996				4.29727			3.70981	3.79861	3.75421	0.0627902
0.245833	14.6387	13.1518	13.4688				4.28806			3.71474	3.80478	3.75976	0.0636652
0.24625	14.6102	13.1381	13.5179				4.30038			3.71845	3.80465	3.76155	0.0609566
0.246667	14.6463	13.0955	13.431				4.34189			3.72079	3.80847	3.76463	0.0619987
0.247083	14.7231	13.2352	13.5599				4.32219			3.72553	3.80976	3.76765	0.0595587
0.2475	14.8598	13.2763	13.5889				4.30568			3.72608	3.8126	3.76934	0.0611784
0.247917	14.7518	13.2452	13.539				4.31402			3.73299	3.81925	3.77612	0.0609918
0.248333	14.7838	13.3092	13.5278				4.36678			3.73343	3.82614	3.77978	0.0655582
0.24875	14.7583	13.1792	13.5221				4.36543			3.73371	3.82527	3.77949	0.0647424
0.249167	14.8	13.1244	13.4549				4.34537			3.7371	3.82827	3.78269	0.0644641
0.249583	14.9293	13.15	13.5285				4.41818			3.74247	3.83181	3.78714	0.0631777
0.25	14.8318	13.1667	13.5537				4.40949			3.74722	3.83698	3.7921	0.0634684
0.250417	14.8473	13.1235	13.5585				4.41226			3.74609	3.83533	3.79071	0.0631041
0.250833	14.8071	13.2298	13.5172				4.42625			3.75252	3.84084	3.79668	0.0624538
0.25125	14.8241	13.3067	13.5902				4.38735			3.75392	3.84681	3.80036	0.0656864
0.251667	14.8295	13.3962	13.5415				4.33013			3.75867	3.84865	3.80366	0.063622
0.252083	14.9046	13.377	13.5642				4.40625			3.75886	3.85114	3.805	0.0652531
0.2525	14.972	13.3712	13.7343				4.38891			3.76129	3.85131	3.8063	0.0636554
0.252917	14.9696	13.2882	14.4178				4.35869			3.76739	3.857	3.8122	0.0633639
0.253333	15.0381	13.3921	14.4062				4.38665			3.77214	3.8605	3.81632	0.062484
0.25375	15.0747	13.3624	14.3806				4.37712			3.77373	3.86318	3.81846	0.0632515
0.254167	15.0042	13.4318	14.3186				4.38621			3.77612	3.86503	3.82058	0.0628734
0.254583	15.0701	13.5441	14.2997				4.33889			3.77724	3.8637	3.82047	0.0611351
0.255	14.9451	13.5822	14.3053				4.35244			3.78042	3.86646	3.82344	0.0608395
0.255417	15.0067	13.6714	14.1386				4.32943			3.78292	3.86903	3.82598	0.0608847
0.255833	15.0582	13.7411	14.16				4.32951			3.78638	3.87008	3.82823	0.0591832
0.25625	15.0654	13.8511	14.1921				4.31584			3.79248	3.87625	3.83436	0.0592284
0.256667	15.0167	13.8151	14.0826				4.30769			3.79402	3.88017	3.83709	0.0609163
0.257083	14.94	13.8263	14.0888				4.33049			3.79807	3.88306	3.84056	0.0600959
0.2575	15.0708	13.8199	14.1583				4.28197			3.80078	3.88751	3.84415	0.0613283
0.257917	15.2137	13.5826	14.2354				4.28987			3.80516	3.89399	3.84957	0.0628154
0.258333	15.1367	13.8969	14.5144				4.32013			3.81016	3.89516	3.85266	0.0601069
0.25875	15.0373	13.9716	14.8313				4.32163			3.81183	3.89915	3.85549	0.061744
0.259167	15.0086	13.887	14.5996				4.28499			3.81715	3.90352	3.86034	0.0610771
0.259583	14.9657	13.8887	14.53				4.27114			3.82136	3.90273	3.86205	0.0575403
0.26	15.0145	13.8058	14.4351				4.29433			3.82487	3.90338	3.86412	0.0555131
0.260417	14.9874	13.8479	14.2333				4.28441			3.82744	3.90319	3.86531	0.0535685
0.260833	14.9877	14.0789	14.4055				4.29697			3.82874	3.90806	3.8684	0.0560843
0.26125	14.9402	14.1844	14.7685				4.29718			3.83297	3.90975	3.87136	0.0542914
0.261667	14.9838	14.256	14.5925				4.30518			3.83267	3.91128	3.87198	0.0555862
0.262083	15.1143	14.1569	14.3061				4.29268			3.83575	3.91647	3.87611	0.0570755
0.2625	15.0431	14.3017	14.4629				4.28002			3.84271	3.91761	3.88016	0.0529637
0.262917	15.1355	14.2675	14.5179				4.27157			3.84732	3.92086	3.88409	0.0519964
0.263333	15.1371	14.4547	14.3737				4.2838			3.85318	3.92309	3.88813	0.0494294
0.26375	15.1391	14.4211	14.2947				4.28958			3.85476	3.92796	3.89136	0.0517645
0.264167	15.1301	14.3841	14.2384				4.27677			3.86093	3.92839	3.89466	0.0477006
0.264583	15.1094	14.3657	14.2302				4.21124			3.86337	3.92893	3.89615	0.0463584
0.265	15.1278	14.5595	14.668				4.2213			3.86467	3.93439	3.89953	0.0493032
0.265417	15.1426	14.6607	14.5602				4.17674			3.86713	3.939	3.90307	0.0508198
0.265833	15.2326	14.7443	14.4983				4.24358			3.86682	3.94203	3.90443	0.0531816
0.26625	15.0723	14.7083	14.629				4.22602			3.87071	3.94548	3.9081	0.0528697
0.266667	15.1419	14.7883	14.8671				4.14883			3.87302	3.94969	3.91136	0.0542133
0.267083	15.2596	14.8123	14.9833				4.14789			3.87644	3.9545	3.91547	0.0551942
0.2675	15.2916	14.9148	15.0146				4.14106			3.8811	3.95485	3.91798	0.0521521
0.267917	15.2979	14.8371	14.9577				4.16499			3.88648	3.95772	3.9221	0.0503718
0.268333	15.2882	14.8807	14.9647				4.16756			3.88923	3.95952	3.92438	0.0496999
0.26875	15.3737	14.819	15.0026				4.11233			3.88946	3.9613	3.92538	0.0508016
0.269167	15.3648	14.8766	15.1439				4.18588			3.89239	3.9657	3.92905	0.051841
0.269583	15.3679	14.9355	15.1981				4.15981			3.90041	3.96909	3.93475	0.0485652
0.27	15.4687	14.92	15.1895				4.15529			3.90061	3.97079	3.9357	0.0496244
0.270417	15.4728	14.9957	15.2246				4.17662			3.90301	3.97326	3.93814	0.0496739
0.270833	15.4486	15.1905	15.3154				4.21711			3.90278	3.97545	3.93911	0.0513822
0.27125	15.3606	15.1986	15.3817				4.23329			3.90786	3.98049	3.94417	0.0513607
0.271667	15.4656	15.1426	15.5867				4.22019			3.91158	3.98377	3.94767	0.0510436
0.272083	15.4802	15.0641	16.1128				4.20871			3.91116	3.98359	3.94737	0.0512178
0.2725	15.5803	15.1598	15.753				4.21481			3.91586	3.98719	3.95152	0.0504338
0.272917	15.5873	15.3132	15.497				4.25325			3.92159	3.98804	3.95482	0.0469879
0.273333	15.6492	15.4154	15.5561				4.2688			3.9266	3.98958	3.95809	0.044534
0.27375	15.6415	15.4607	15.2984				4.27985			3.92604	3.99441	3.96023	0.048343
0.274167	15.7053	15.5756	15.2405				4.30518			3.93037	3.9989	3.96463	0.0484635
0.274583	15.6475	15.5746	15.5563				4.29232			3.93287	4.0027	3.96779	0.0493798
0.275	15.7197	15.6576	15.9292				4.26524			3.93602	4.00662	3.97132	0.0499216
0.275417	15.7977	15.7905	16.3233				4.27418			3.94023	4.00551	3.97287	0.0461556
0.275833	15.6991	15.7154	16.177				4.29071			3.94335	4.0105	3.97692	0.0474812
0.27625	15.7022	15.8983	16.0128				4.34491			3.94808	4.01387	3.98098	0.0465219
0.276667	15.6579	15.7969	15.4436				4.34113			3.94848	4.01577	3.98212	0.0475818
0.277083	15.6706	15.9232	15.4761				4.32993			3.95275	4.01685	3.9848	0.0453269
0.2775	15.5895	15.8661	15.7008				4.32746			3.9537	4.02009	3.98689	0.0469455
0.277917	15.6285	15.8064	15.4592				4.35191			3.9577	4.02311	3.99041	0.0462546
0.278333	15.641	15.6988	15.1216				4.33255			3.96319	4.02929	3.99624	0.04674
0.27875	15.7445	15.9316	15.2074				4.30861			3.96699	4.03093	3.99896	0.045214
0.279167	15.7189	16.0838	15.3496				4.33505			3.96765	4.03229	3.99997	0.0457104
0.279583	15.6246	16.0153	15.4542				4.34104			3.97244	4.03382	4.00313	0.0434015
0.28	15.6519	16.1502	15.481				4.37875			3.97312	4.03935	4.00624	0.0468319
0.280417	15.7242	16.1975	15.434				4.38722			3.97814	4.04121	4.00967	0.0445974
0.280833	15.8208	16.3112	15.5025				4.33669			3.98137	4.0449	4.01313	0.0449216
0.28125	15.8731	16.4404	15.7292				4.35043			3.98297	4.04645	4.01471	0.0448867
0.281667	15.8871	16.5908	16.0207				4.36591			3.98609	4.04928	4.01769	0.0446775
0.282083	15.8668	16.7607	16.1874				4.43507			3.987	4.05062	4.01881	0.0449906
0.2825	15.8213	16.8762	16.3053				4.45357			3.99017	4.05308	4.02162	0.0444808
0.282917	16.0043	16.7264	16.4119				4.43236			3.99623	4.05585	4.02604	0.0421592
0.283333	15.9119	16.7133	16.2254				4.45524			3.99649	4.05574	4.02612	0.0418937
0.28375	16.0111	16.9933	16.3286				4.40201			4.00301	4.05761	4.03031	0.0386099
0.284167	16.0936	17.0833	16.3258				4.35137			4.00476	4.0642	4.03448	0.0420304
0.284583	16.0484	16.9055	16.3713				4.3859			4.00809	4.0666	4.03735	0.0413721
0.285	16.0686	17.0663	16.4561				4.37947			4.01284	4.07135	4.04209	0.0413726
0.285417	16.1062	17.0866	16.6501				4.37906			4.01743	4.07201	4.04472	0.0385906
0.285833	16.139	17.0202	16.7997				4.37672			4.01749	4.07604	4.04676	0.0414032
0.28625	16.1082	17.0822	16.7736				4.37183			4.02072	4.08098	4.05085	0.0426145
0.286667	16.0436	16.9034	16.7935				4.3194			4.02491	4.08237	4.05364	0.040633
0.287083	16.0701	17.0519	16.7444				4.30692			4.02371	4.08634	4.05503	0.0442852
0.2875	16.1081	17.0008	16.7275				4.3593			4.02428	4.08978	4.05703	0.0463139
0.287917	16.2063	17.0513	16.4556				4.34648			4.02585	4.08871	4.05728	0.0444465
0.288333	16.1702	17.0535	16.3235				4.33984			4.03021	4.08626	4.05823	0.039636
0.28875	16.2314	17.1957	16.6148				4.31973			4.03147	4.09143	4.06145	0.0424027
0.289167	16.2957	16.9569	16.5158				4.32129			4.03535	4.09881	4.06708	0.0448725
0.289583	16.3252	17.0961	16.4654				4.31903			4.03897	4.10548	4.07222	0.0470289
0.29	16.4564	17.3175	16.497				4.25637			4.04127	4.10724	4.07426	0.0466493
0.290417	16.5384	17.3672	16.1907				4.28752			4.04785	4.10877	4.07831	0.0430759
0.290833	16.4791	17.4811	16.3656				4.28935			4.05092	4.11318	4.08205	0.0440238
0.29125	16.5208	17.3653	16.0872				4.29371			4.0527	4.11529	4.084	0.0442599
0.291667	16.525	17.18	16.0421				4.2618			4.0554	4.1192	4.0873	0.0451118
0.292083	16.5713	17.406	15.9775				4.24898			4.05539	4.11811	4.08675	0.0443542
0.2925	16.652	17.6516	15.9366				4.24642			4.06089	4.12168	4.09128	0.0429856
0.292917	16.6738	17.6977	15.9012				4.28279			4.06199	4.1271	4.09455	0.0460411
0.293333	16.5673	17.712	15.937				4.30162			4.06455	4.13006	4.0973	0.0463204
0.29375	16.6368	17.6661	16.1949				4.27094			4.0677	4.12927	4.09848	0.0435363
0.294167	16.6234	17.7443	16.6461				4.2438			4.06789	4.13348	4.10069	0.0463771
0.294583	16.6265	17.7183	16.8396				4.24123			4.07348	4.13464	4.10406	0.0432459
0.295	16.5757	17.6973	16.8272				4.22853			4.08076	4.14101	4.11089	0.0426009
0.295417	16.5658	17.665	16.9832				4.23181			4.08166	4.13812	4.10989	0.0399219
0.295833	16.5929	17.8361	17.036				4.23124			4.0862	4.13955	4.11288	0.0377205
0.29625	16.5886	18.0923	16.7056				4.26478			4.08734	4.14378	4.11556	0.0399082
0.296667	16.6298	18.2349	16.6077				4.23952			4.09071	4.1457	4.11821	0.0388857
0.297083	16.6522	18.2383	16.322				4.23437			4.09156	4.1464	4.11898	0.038776
0.2975	16.738	18.271	16.1542				4.21051			4.09598	4.14721	4.12159	0.0362294
0.297917	16.6546	18.4484	16.173				4.17226			4.09903	4.15329	4.12616	0.0383709
0.298333	16.7619	18.5198	16.1252				4.21412			4.10089	4.15422	4.12755	0.0377092
0.29875	16.8615	18.5907	16.2665				4.21847			4.10464	4.15676	4.1307	0.036859
0.299167	16.9217	18.378	16.2945				4.18965			4.10816	4.16232	4.13524	0.0382938
0.299583	16.8474	18.3825	16.3622				4.15828			4.10761	4.16332	4.13547	0.0393975
0.3	16.8848	18.3482	16.4533				4.16609			4.11098	4.16573	4.13835	0.03872
0.300417	16.9206	18.4679	16.8639				4.19616			4.11341	4.1682	4.1408	0.0387474
0.300833	17.0156	18.6477	17.0692				4.16563			4.11756	4.16982	4.14369	0.0369514
0.30125	17.0205	18.4902	17.1855				4.16466			4.12092	4.17191	4.14642	0.0360573
0.301667	17.0503	18.6159	17.3288				4.25658			4.12408	4.17274	4.14841	0.0344083
0.302083	17.0583	18.6432	17.461				4.24959			4.12808	4.17689	4.15249	0.0345132
0.3025	17.0474	18.5551	17.4314				4.25216			4.13213	4.17925	4.15569	0.0333194
0.302917	16.9975	18.6591	17.4942				4.28467			4.13324	4.18101	4.15713	0.0337747
0.303333	16.9564	18.7527	17.5317				4.26619			4.13644	4.18602	4.16123	0.0350641
0.30375	17.0634	18.7292	17.4982				4.28436			4.13853	4.18981	4.16417	0.036259
0.304167	17.0905	18.5938	17.5141				4.32577			4.14114	4.19146	4.1663	0.0355824
0.304583	17.03	18.7054	17.5263				4.29966			4.1414	4.1968	4.1691	0.0391774
0.305	17.075	18.787	17.703				4.26178			4.14568	4.1991	4.17239	0.0377777
0.305417	17.1649	18.8839	17.5131				4.27079			4.14807	4.20343	4.17575	0.0391422
0.305833	17.2392	18.7967	17.4475				4.26355			4.1538	4.2065	4.18015	0.0372665
0.30625	17.139	18.8208	17.5141				4.30173			4.15764	4.20619	4.18191	0.0343272
0.306667	17.1844	18.8774	17.5682				4.30127			4.15791	4.21025	4.18408	0.0370076
0.307083	17.1664	18.9438	17.6462				4.30669			4.16496	4.21137	4.18816	0.0328207
0.3075	17.224	19.1406	17.5235				4.31595			4.169	4.21778	4.19339	0.0344929
0.307917	17.2446	19.2089	17.6342				4.37424			4.16955	4.21679	4.19317	0.0334021
0.308333	17.2398	19.1843	17.8327				4.36443			4.17305	4.21839	4.19572	0.0320605
0.30875	17.2535	19.1104	17.9907				4.41597			4.17406	4.22031	4.19718	0.0327074
0.309167	17.255	18.8714	17.9211				4.38073			4.1761	4.22313	4.19962	0.0332578
0.309583	17.346	18.8941	17.7027				4.35406			4.17667	4.2271	4.20189	0.0356604
0.31	17.2572	18.942	17.3913				4.38936			4.17972	4.22606	4.20289	0.0327615
0.310417	17.3562	19.069	17.1567				4.37527			4.18393	4.23061	4.20727	0.0330122
0.310833	17.4625	19.2707	17.111				4.37733			4.18787	4.23455	4.21121	0.033009
0.31125	17.43	19.253	17.0911				4.40293			4.18735	4.23709	4.21222	0.0351649
0.311667	17.533	19.1758	17.1051				4.39234			4.18952	4.23944	4.21448	0.0352952
0.312083	17.5299	19.3698	17.1392				4.36425			4.19357	4.24257	4.21807	0.0346478
0.3125	17.609	19.4024	17.1041				4.3798			4.19551	4.24977	4.22264	0.0383646
0.312917	17.5888	19.3853	17.0814				4.33654			4.199	4.25313	4.22607	0.0382762
0.313333	17.5674	19.3201	16.8454				4.38758			4.2022	4.25651	4.22935	0.0383991
0.31375	17.6726	19.2981	16.9422				4.4122			4.20542	4.25675	4.23109	0.0362992
0.314167	17.7191	19.3774	16.893				4.45393			4.20887	4.25938	4.23412	0.0357221
0.314583	17.6496	19.3286	16.9529				4.38516			4.20917	4.26511	4.23714	0.0395592
0.315	17.6678	19.1722	16.9915				4.36735			4.21406	4.26704	4.24055	0.0374631
0.315417	17.6551	19.3884	16.7748				4.37736			4.21506	4.26829	4.24167	0.037639
0.315833	17.7149	19.3359	17.1144				4.38318			4.21466	4.27277	4.24371	0.0410942
0.31625	17.7853	19.167	18.4808				4.38866			4.21777	4.27054	4.24416	0.0373136
0.316667	17.7723	19.2703	18.5552				4.36818			4.22029	4.27102	4.24565	0.0358777
0.317083	17.8118	19.3198	17.9481				4.34527			4.22557	4.26964	4.24761	0.0311586
0.3175	17.8551	19.3732	17.6055				4.37495			4.22737	4.27485	4.25111	0.0335747
0.317917	17.9061	19.437	17.7976				4.36969			4.23113	4.27729	4.25421	0.0326401
0.318333	17.9427	19.4473	18.1553				4.33626			4.23622	4.27877	4.25749	0.0300892
0.31875	17.8611	19.4182	17.8329				4.36511			4.24192	4.28042	4.26117	0.0272196
0.319167	17.9258	19.5447	17.5948				4.35447			4.24233	4.28072	4.26152	0.0271452
0.319583	17.8644	19.4393	17.5381				4.35062			4.24745	4.28291	4.26518	0.0250744
0.32	17.9093	19.0905	17.9334				4.36027			4.25087	4.28699	4.26893	0.0255462
0.320417	17.975	18.8956	18.2936				4.33009			4.25083	4.29235	4.27159	0.0293607
0.320833	18.1054	18.9725	18.3812				4.30597			4.25625	4.29797	4.27711	0.0295017
0.32125	18.0818	19.282	18.5401				4.3276			4.25694	4.29792	4.27743	0.0289756
0.321667	18.0616	19.2081	18.5097				4.35197			4.26052	4.29983	4.28017	0.0277958
0.322083	18.075	19.2955	18.3983				4.30579			4.25749	4.30359	4.28054	0.032596
0.3225	18.1078	19.3635	17.9424				4.32374			4.26093	4.30795	4.28444	0.0332455
0.322917	18.1179	19.3098	17.6387				4.30639			4.26085	4.3123	4.28657	0.0363805
0.323333	18.1742	19.4477	17.483				4.26516			4.26478	4.31494	4.28986	0.0354688
0.32375	18.2115	19.5821	17.4872				4.26878			4.26813	4.31524	4.29169	0.0333143
0.324167	18.2239	19.5189	18.0835				4.28527			4.27198	4.31813	4.29505	0.0326336
0.324583	18.2692	19.1431	18.342				4.25938			4.27288	4.32153	4.29721	0.0343992
0.325	18.3219	18.7625	18.4133				4.24776			4.27732	4.32455	4.30094	0.0334028
0.325417	18.3995	18.998	18.5609				4.22312			4.27865	4.32614	4.3024	0.0335846
0.325833	18.3911	19.1224	18.8325				4.24965			4.28186	4.32749	4.30467	0.0322686
0.32625	18.4261	19.4461	18.9176				4.25074			4.28298	4.33181	4.30739	0.0345285
0.326667	18.3613	19.6312	18.9134				4.21812			4.28792	4.33247	4.31019	0.0315039
0.327083	18.406	19.6771	18.8488				4.20721			4.29164	4.33595	4.3138	0.031335
0.3275	18.3866	19.7884	18.9996				4.19947			4.28868	4.33738	4.31303	0.0344357
0.327917	18.3936	19.828	19.1572				4.26921			4.2925	4.33658	4.31454	0.031171
0.328333	18.4221	19.5492	19.3219				4.23319			4.29505	4.34033	4.31769	0.0320203
0.32875	18.4746	19.5782	19.0669				4.21179			4.30018	4.34394	4.32206	0.0309455
0.329167	18.5493	19.7139	18.539				4.17996			4.30257	4.34681	4.32469	0.0312844
0.329583	18.492	19.8037	18.362				4.19744			4.30352	4.34782	4.32567	0.0313224
0.33	18.5302	19.7946	18.4016				4.24294			4.30448	4.35277	4.32862	0.0341475
0.330417	18.604	19.8353	18.3893				4.20389			4.3089	4.35729	4.33309	0.0342136
0.330833	18.6079	19.9264	18.4036				4.14893			4.31004	4.35856	4.3343	0.0343095
0.33125	18.5985	20.0732	18.3911				4.19154			4.31484	4.35924	4.33704	0.0314
0.331667	18.6383	20.2542	18.1845				4.21679			4.31455	4.36292	4.33873	0.0342002
0.332083	18.7077	20.1511	18.1122				4.19801			4.3207	4.37004	4.34537	0.0348889
0.3325	18.7124	20.1239	18.2757				4.17076			4.32027	4.36785	4.34406	0.0336475
0.332917	18.8057	20.1217	18.6364				4.14735			4.32418	4.37012	4.34715	0.0324852
0.333333	18.8344	20.04	18.7288				4.14455			4.32135	4.36913	4.34524	0.0337883
0.33375	18.8431	19.994	18.5855				4.21576			4.32273	4.37482	4.34878	0.0368277
0.334167	18.758	19.9725	18.5431				4.22092			4.3241	4.38022	4.35216	0.0396813
0.334583	18.7865	19.9878	18.707				4.18999			4.32844	4.37935	4.35389	0.0359995
0.335	18.8095	20.0672	18.5864				4.19061			4.33132	4.3826	4.35696	0.0362555
0.335417	18.8512	20.1848	18.5884				4.20105			4.33042	4.38848	4.35945	0.0410488
0.335833	18.905	20.1412	18.6499				4.21274			4.33498	4.38838	4.36168	0.0377631
0.33625	19.028	20.0258	18.8845				4.23681			4.33576	4.39007	4.36292	0.0384026
0.336667	19.0054	20.1638	18.9608				4.22152			4.33834	4.39356	4.36595	0.0390486
0.337083	18.9696	20.2876	18.9093				4.26459			4.3372	4.39526	4.36623	0.0410518
0.3375	18.9631	20.3332	19.0743				4.28087			4.34501	4.39901	4.37201	0.0381881
0.337917	19.0028	20.4496	19.0614				4.31241			4.3495	4.40137	4.37544	0.0366787
0.338333	19.0481	20.312	19.1408				4.31642			4.35123	4.40054	4.37589	0.0348651
0.33875	19.1154	20.0072	19.0847				4.28621			4.3583	4.40206	4.38018	0.0309414
0.339167	19.1231	19.8277	19.3589				4.28175			4.36023	4.40563	4.38293	0.0321008
0.339583	19.2248	19.821	19.6343				4.3026			4.36114	4.40908	4.38511	0.0339054
0.34	19.297	19.9727	20.0125				4.3165			4.36485	4.4075	4.38618	0.0301564
0.340417	19.26	19.9857	20.2761				4.27561			4.36787	4.41108	4.38948	0.0305564
0.340833	19.304	19.8821	20.0854				4.27375			4.37042	4.41235	4.39138	0.0296496
0.34125	19.3589	19.871	19.9224				4.29719			4.37257	4.41572	4.39414	0.0305085
0.341667	19.3466	20.0636	19.8183				4.25464			4.37576	4.41681	4.39629	0.0290328
0.342083	19.2782	20.2165	20.2224				4.26178			4.37706	4.4161	4.39658	0.0276044
0.3425	19.3405	20.5139	19.6892				4.28432			4.37828	4.41713	4.3977	0.0274706
0.342917	19.3115	20.6576	19.5501				4.33267			4.38239	4.42585	4.40412	0.0307259
0.343333	19.3248	20.5143	19.1484				4.30724			4.38663	4.42658	4.40661	0.0282518
0.34375	19.2438	20.2653	19.0597				4.30581			4.38479	4.42847	4.40663	0.0308818
0.344167	19.3151	20.4916	19.1597				4.30628			4.38712	4.4284	4.40776	0.0291894
0.344583	19.2941	20.7645	19.0903				4.29532			4.39036	4.43057	4.41046	0.0284327
0.345	19.3222	21.0315	19.0697				4.33151			4.39348	4.43431	4.41389	0.0288698
0.345417	19.3278	21.3371	19.044				4.33376			4.39816	4.43507	4.41662	0.0260998
0.345833	19.3226	21.4598	19.3403				4.35947			4.3999	4.43558	4.41774	0.0252278
0.34625	19.2958	21.5106	19.5022				4.35463			4.40519	4.43974	4.42246	0.0244314
0.346667	19.3251	21.6676	19.6301				4.39765			4.40582	4.44048	4.42315	0.0245096
0.347083	19.352	21.8967	19.8809				4.38137			4.41112	4.4415	4.42631	0.021478
0.3475	19.344	22.0003	19.768				4.37692			4.41399	4.44447	4.42923	0.0215519
0.347917	19.3819	22.3286	19.8304				4.3495			4.41358	4.44676	4.43017	0.0234665
0.348333	19.3546	22.7351	19.7087				4.33365			4.41482	4.44952	4.43217	0.0245363
0.34875	19.4354	23.0107	19.8578				4.30531			4.41258	4.45242	4.4325	0.0281682
0.349167	19.4742	23.1879	20.6833				4.33677			4.41254	4.45481	4.43368	0.0298866
0.349583	19.4666	23.563	20.3106				4.32004			4.41695	4.46221	4.43958	0.032008
0.35	19.5819	23.8411	19.7978				4.33584			4.42155	4.46619	4.44387	0.0315713
0.350417	19.5501	23.8967	19.5765				4.32546			4.42333	4.46857	4.44595	0.0319935
0.350833	19.5718	24.1173	19.8757				4.31401			4.42651	4.47322	4.44986	0.0330296
0.35125	19.6313	23.8005	19.6234				4.25091			4.42691	4.47176	4.44933	0.0317141
0.351667	19.6911	23.0662	19.4954				4.27986			4.42868	4.47589	4.45229	0.0333778
0.352083	19.7312	23.0419	19.8151				4.23589			4.42916	4.47476	4.45196	0.0322446
0.3525	19.794	22.8216	19.9003				4.25018			4.43539	4.47832	4.45686	0.0303524
0.352917	19.8241	22.5806	20.0283				4.23617			4.4365	4.48175	4.45912	0.0320012
0.353333	19.8375	23.0525	20.1968				4.22817			4.44064	4.47888	4.45976	0.0270389
0.35375	19.9052	23.0759	20.0839				4.18656			4.4398	4.48528	4.46254	0.032159
0.354167	19.8766	23.2574	19.9417				4.19301			4.44623	4.48329	4.46476	0.026208
0.354583	19.9343	23.3758	19.6514				4.20299			4.44949	4.48379	4.46664	0.0242494
0.355	19.9623	23.3071	19.3192				4.24919			4.44856	4.48822	4.46839	0.0280444
0.355417	19.9612	23.446	19.2849				4.21285			4.45069	4.49006	4.47038	0.027837
0.355833	19.9786	23.5054	19.3356				4.20679			4.45506	4.49218	4.47362	0.026247
0.35625	20.0832	23.5991	19.7305				4.24683			4.45882	4.49658	4.4777	0.0267002
0.356667	20.1043	23.7819	19.8124				4.21743			4.45773	4.49955	4.47864	0.0295676
0.357083	20.1206	24.0718	19.9941				4.22676			4.46049	4.50157	4.48103	0.029048
0.3575	20.1362	23.8208	19.9245				4.19079			4.45953	4.50223	4.48088	0.0301901
0.357917	20.213	23.6855	19.8894				4.19294			4.46647	4.50629	4.48638	0.0281564
0.358333	20.211	23.6996	19.9106				4.21741			4.46607	4.50598	4.48602	0.0282202
0.35875	20.2687	23.5955	20.0781				4.21289			4.47	4.50796	4.48898	0.0268391
0.359167	20.2931	23.4717	20.2243				4.24958			4.47274	4.50888	4.49081	0.0255519
0.359583	20.3733	22.9558	20.3222				4.20299			4.47365	4.51471	4.49418	0.029032
0.36	20.389	22.7105	20.5059				4.17603			4.47094	4.51665	4.4938	0.0323278
0.360417	20.3809	23.2831	20.5436				4.17076			4.47215	4.51788	4.49501	0.0323318
0.360833	20.4277	23.7747	20.496				4.13343			4.4737	4.51971	4.4967	0.0325341
0.36125	20.398	24.026	20.4608				4.13974			4.47924	4.5244	4.50182	0.0319317
0.361667	20.4789	23.7722	20.5649				4.16749			4.47878	4.52651	4.50265	0.033748
0.362083	20.4981	23.8624	20.6398				4.13559			4.47825	4.52704	4.50264	0.0344978
0.3625	20.5914	23.6661	20.6017				4.11986			4.48045	4.52861	4.50453	0.0340552
0.362917	20.6185	23.9459	20.825				4.10677			4.48212	4.52975	4.50593	0.0336782
0.363333	20.663	24.3532	20.904				4.11761			4.48599	4.52744	4.50671	0.029316
0.36375	20.7321	24.6157	20.9252				4.16474			4.48728	4.52855	4.50791	0.029183
0.364167	20.7662	24.6392	20.9212				4.15344			4.4914	4.53241	4.51191	0.0289969
0.364583	20.8299	24.5583	21.1298				4.14249			4.49001	4.53512	4.51257	0.0318928
0.365	20.734	24.7252	21.0783				4.19346			4.4917	4.53864	4.51517	0.0331916
0.365417	20.802	24.7179	21.0361				4.19184			4.4935	4.53888	4.51619	0.0320849
0.365833	20.8645	24.5055	21.1325				4.17879			4.4939	4.54129	4.5176	0.0335151
0.36625	20.8216	24.6038	21.1067				4.17853			4.49907	4.54393	4.5215	0.031719
0.366667	20.8725	24.6109	21.2336				4.17713			4.4987	4.54646	4.52258	0.0337701
0.367083	20.9623	24.4544	21.2781				4.21797			4.50418	4.5501	4.52714	0.0324729
0.3675	20.8974	24.4569	21.365				4.1865			4.50631	4.55378	4.53004	0.0335697
0.367917	20.9765	24.3964	21.4176				4.17266			4.5088	4.55551	4.53215	0.0330282
0.368333	21.0115	24.4148	21.8125				4.19166			4.51144	4.55818	4.53481	0.0330489
0.36875	20.9805	24.0983	22.3635				4.1805			4.51229	4.55582	4.53406	0.0307794
0.369167	21.0054	24.3413	22.1906				4.20396			4.51415	4.55736	4.53575	0.0305519
0.369583	21.0812	23.6264	22.0894				4.22263			4.5166	4.55993	4.53826	0.0306445
0.37	21.1502	23.8326	22.1608				4.23105			4.51656	4.56181	4.53919	0.0319946
0.370417	21.2276	24.097	22.1127				4.17515			4.51945	4.56623	4.54284	0.0330749
0.370833	21.1575	24.5354	22.0959				4.2025			4.5242	4.56725	4.54572	0.0304412
0.37125	21.1959	24.7973	22.1136				4.23797			4.52921	4.57144	4.55032	0.029857
0.371667	21.2261	23.9244	21.9996				4.23917			4.53173	4.57311	4.55242	0.0292635
0.372083	21.194	23.068	21.8794				4.25446			4.53119	4.57021	4.5507	0.0275896
0.3725	21.2456	22.9853	22.0472				4.25104			4.53234	4.57642	4.55438	0.031173
0.372917	21.3283	22.6828	22.2442				4.24547			4.53468	4.58068	4.55768	0.0325294
0.373333	21.3282	22.6064	22.272				4.27205			4.53577	4.58215	4.55896	0.0327931
0.37375	21.3396	23.1071	22.3059				4.27369			4.53896	4.58261	4.56079	0.0308668
0.374167	21.4226	22.8552	22.4174				4.29838			4.54109	4.58602	4.56356	0.0317703
0.374583	21.4664	23.0556	22.407				4.27317			4.54472	4.58774	4.56623	0.0304204
0.375	21.4551	23.1909	22.5225				4.2738			4.54557	4.58867	4.56712	0.0304768
0.375417	21.5327	23.5485	22.5591				4.27518			4.54369	4.58912	4.5664	0.0321207
0.375833	21.6079	23.7812	22.1542				4.2515			4.54618	4.59234	4.56926	0.0326354
0.37625	21.6103	23.8279	21.899				4.30028			4.54819	4.59753	4.57286	0.0348887
0.376667	21.5964	23.9183	21.7394				4.26847			4.5501	4.59964	4.57487	0.0350293
0.377083	21.6488	23.9906	21.7656				4.24887			4.55182	4.60325	4.57754	0.0363667
0.3775	21.7589	23.9077	21.8493				4.24561			4.55248	4.6044	4.57844	0.036712
0.377917	21.7597	23.2792	21.8021				4.20786			4.55597	4.60755	4.58176	0.0364725
0.378333	21.7945	22.7818	21.8934				4.23305			4.55283	4.60809	4.58046	0.0390751
0.37875	21.8098	22.7102	22.9837				4.22728			4.55514	4.61105	4.5831	0.0395349
0.379167	21.9452	22.9777	22.6352				4.28502			4.56089	4.61258	4.58673	0.0365492
0.379583	21.918	23.7428	22.4448				4.26804			4.5608	4.6091	4.58495	0.0341515
0.38	21.9238	24.1099	22.1263				4.24347			4.56364	4.61385	4.58874	0.0354996
0.380417	22.0013	24.7694	21.9731				4.26761			4.56465	4.61819	4.59142	0.0378576
0.380833	22.0124	25.0552	22.0405				4.26959			4.56558	4.61866	4.59212	0.03753
0.38125	22.0243	25.2069	22.0729				4.23615			4.56824	4.62239	4.59532	0.038286
0.381667	22.0674	25.3839	22.2231				4.20898			4.57082	4.62631	4.59856	0.0392351
0.382083	22.1579	25.7228	22.7508				4.22753			4.5728	4.62914	4.60097	0.0398427
0.3825	22.1353	25.5126	22.8791				4.20081			4.57477	4.63082	4.60279	0.0396303
0.382917	22.1485	24.8925	22.5764				4.21818			4.57741	4.63148	4.60444	0.0382388
0.383333	22.1772	24.4955	22.3445				4.21474			4.57816	4.63481	4.60648	0.0400552
0.38375	22.2005	24.1654	22.0534				4.20495			4.57968	4.63891	4.6093	0.0418853
0.384167	22.2194	24.7382	22.111				4.20655			4.58103	4.64094	4.61099	0.0423642
0.384583	22.2223	24.8437	22.2051				4.21691			4.58007	4.64212	4.6111	0.0438749
0.385	22.2508	25.5258	22.3351				4.18803			4.58228	4.64607	4.61418	0.0451076
0.385417	22.3525	25.7301	22.526				4.14715			4.58642	4.64632	4.61637	0.0423618
0.385833	22.4514	25.9335	22.5917				4.17587			4.58676	4.64791	4.61734	0.0432345
0.38625	22.4141	25.8525	22.5337				4.14951			4.59379	4.65337	4.62358	0.0421255
0.386667	22.4461	25.9604	22.5676				4.13903			4.59419	4.65415	4.62417	0.0424005
0.387083	22.516	26.1195	22.5978				4.11439			4.5945	4.65662	4.62556	0.0439289
0.3875	22.5772	26.4489	23.5801				4.10092			4.59444	4.6559	4.62517	0.0434598
0.387917	22.5802	26.4921	23.8211				4.12538			4.59339	4.65752	4.62546	0.0453447
0.388333	22.5702	26.6415	23.6112				4.13917			4.59802	4.65974	4.62888	0.0436457
0.38875	22.6902	26.8449	23.6622				4.11112			4.59854	4.66	4.62927	0.0434596
0.389167	22.6989	26.888	23.4351				4.1295			4.59673	4.66297	4.62985	0.0468416
0.389583	22.7095	26.1484	23.3331				4.11523			4.5978	4.66475	4.63127	0.0473446
0.39	22.7647	26.2835	23.5564				4.12474			4.59829	4.66792	4.63311	0.0492349
0.390417	22.7226	26.5273	23.7048				4.14049			4.60115	4.66755	4.63435	0.0469508
0.390833	22.7989	26.7786	23.889				4.13915			4.60317	4.66873	4.63595	0.0463554
0.39125	22.862	27.0307	23.6055				4.10478			4.60566	4.67451	4.64009	0.048685
0.391667	22.8689	26.9818	23.4543				4.13424			4.60894	4.67868	4.64381	0.0493143
0.392083	22.8969	26.9467	23.3704				4.10651			4.61421	4.68291	4.64856	0.0485771
0.3925	22.9556	26.8495	23.4055				4.11506			4.6173	4.68362	4.65046	0.046892
0.392917	22.9908	26.7791	23.5145				4.10961			4.62002	4.68139	4.6507	0.0433981
0.393333	23.0027	26.8151	23.6158				4.04411			4.62288	4.6838	4.65334	0.0430811
0.39375	23.0856	26.553	23.7054				4.04196			4.62479	4.68561	4.6552	0.0430058
0.394167	23.0759	26.5779	23.8347				4.06663			4.62386	4.68827	4.65607	0.0455478
0.394583	23.1201	26.5084	24.0095				4.07068			4.62439	4.6893	4.65685	0.0459015
0.395	23.1976	26.7249	24.0941				4.04611			4.62978	4.6941	4.66194	0.0454785
0.395417	23.1851	26.9872	24.4046				4.00991			4.62452	4.69641	4.66047	0.0508339
0.395833	23.2122	26.7015	24.6414				4.05639			4.62857	4.69788	4.66323	0.0490091
0.39625	23.275	26.5754	24.8135				4.06735			4.63017	4.70116	4.66566	0.0501986
0.396667	23.3595	26.8997	25.3786				4.04087			4.63596	4.70302	4.66949	0.047421
0.397083	23.4213	27.0427	24.7558				4.09735			4.63639	4.70302	4.66971	0.0471161
0.3975	23.4837	27.1715	24.7235				4.08814			4.63654	4.70586	4.6712	0.0490171
0.397917	23.5342	27.3062	24.7355				4.09851			4.64019	4.70464	4.67241	0.0455754
0.398333	23.5239	27.3748	24.7291				4.08929			4.64215	4.70571	4.67393	0.0449418
0.39875	23.5345	27.5704	24.7916				4.08855			4.64225	4.70709	4.67467	0.0458456
0.399167	23.6091	27.4412	24.9917				4.11508			4.63744	4.70974	4.67359	0.0511196
0.399583	23.5458	27.0719	25.2328				4.08277			4.63757	4.70869	4.67313	0.0502866
0.4	23.5895	27.0966	25.5155				4.10001			4.6415	4.71021	4.67585	0.0485859
0.400417	23.6355	27.2254	26.3296				4.11719			4.64223	4.7112	4.67672	0.048774
0.400833	23.6957	26.8137	26.3389				4.12738			4.64707	4.71037	4.67872	0.0447612
0.40125	23.654	26.9961	26.349				4.1472			4.65111	4.71274	4.68192	0.0435794
0.401667	23.7207	27.3707	26.0394				4.13203			4.65105	4.71329	4.68217	0.0440091
0.402083	23.7381	27.3902	25.9963				4.14669			4.65369	4.71605	4.68487	0.044094
0.4025	23.7878	27.4992	25.9585				4.10933			4.65478	4.71391	4.68435	0.0418095
0.402917	23.8746	27.7648	25.8226				4.14297			4.65318	4.71333	4.68325	0.0425299
0.403333	23.9086	27.8655	25.5253				4.13244			4.65631	4.71968	4.688	0.0448149
0.40375	23.925	27.8108	25.3394				4.16668			4.65487	4.72825	4.69156	0.0518879
0.404167	23.968	27.9453	25.4632				4.17595			4.65746	4.72837	4.69291	0.0501463
0.404583	23.9901	27.9985	25.6767				4.15609			4.65734	4.73054	4.69394	0.0517596
0.405	24.083	27.5676	25.6766				4.1294			4.66265	4.73169	4.69717	0.0488217
0.405417	24.1154	27.6957	25.8339				4.16631			4.66185	4.73183	4.69684	0.0494796
0.405833	24.136	27.6491	25.7805				4.13645			4.66068	4.73503	4.69786	0.0525702
0.40625	24.1186	27.4968	25.7424				4.16903			4.66263	4.73799	4.70031	0.0532904
0.406667	24.1652	27.4323	25.734				4.17897			4.66466	4.74064	4.70265	0.0537214
0.407083	24.178	27.528	25.9025				4.22422			4.66722	4.74093	4.70407	0.052126
0.4075	24.2548	27.4041	25.8557				4.21971			4.67154	4.74048	4.70601	0.0487467
0.407917	24.2283	27.3464	25.8477				4.20067			4.66895	4.74239	4.70567	0.0519351
0.408333	24.3145	27.3093	25.9266				4.20322			4.67097	4.74317	4.70707	0.0510499
0.40875	24.4033	27.3672	26.0443				4.20795			4.67635	4.74321	4.70978	0.0472839
0.409167	24.357	27.5988	25.8023				4.16325			4.67861	4.74575	4.71218	0.0474739
0.409583	24.396	27.5324	25.8807				4.19851			4.67733	4.74341	4.71037	0.0467255
0.41	24.3902	27.5873	25.953				4.16982			4.68245	4.75093	4.71669	0.0484235
0.410417	24.4079	27.4637	26.1859				4.20986			4.68606	4.75372	4.71989	0.0478405
0.410833	24.5006	27.3309	26.1842				4.16236			4.68234	4.75716	4.71975	0.0529068
0.41125	24.525	27.6456	26.3179				4.10315			4.6851	4.75868	4.72189	0.0520309
0.411667	24.5408	27.6176	26.2886				4.12305			4.68788	4.75414	4.72101	0.0468546
0.412083	24.5527	27.9056	26.4931				4.11709			4.68851	4.75636	4.72244	0.0479796
0.4125	24.5619	28.0672	26.5773				4.14213			4.6906	4.75967	4.72514	0.0488387
0.412917	24.5434	28.1033	26.7213				4.14598			4.69166	4.76018	4.72592	0.0484533
0.413333	24.5669	28.1406	26.7782				4.11432			4.69511	4.76199	4.72855	0.0472849
0.41375	24.5793	28.1014	26.8384				4.0958			4.6942	4.75899	4.7266	0.0458167
0.414167	24.6227	27.9822	27.0137				4.11231			4.69606	4.76226	4.72916	0.0468146
0.414583	24.7155	27.8024	27.229				4.08547			4.6945	4.76558	4.73004	0.0502618
0.415	24.7295	27.8715	27.3523				4.05833			4.69737	4.76695	4.73216	0.0491968
0.415417	24.7544	28.0057	27.6681				4.11058			4.70085	4.77001	4.73543	0.0489042
0.415833	24.7833	28.0342	28.2735				4.08448			4.70047	4.77137	4.73592	0.0501389
0.41625	24.8277	27.9783	28.0052				4.08146			4.70164	4.77235	4.737	0.0499977
0.416667	24.8767	28.0404	27.5594				4.0669			4.70439	4.77728	4.74083	0.0515417
0.417083	24.9666	28.0555	27.4212				4.09654			4.70562	4.78123	4.74342	0.0534628
0.4175	25.0289	28.0397	27.44				4.04176			4.70505	4.78368	4.74437	0.0556013
0.417917	24.9746	28.0327	27.5556				4.03517			4.70549	4.78597	4.74573	0.0569075
0.418333	24.9711	28.1134	27.5342				4.03478			4.70823	4.78573	4.74698	0.0548046
0.41875	25.0324	28.1739	27.5655				4.05435			4.71361	4.78685	4.75023	0.0517882
0.419167	25.0059	28.056	27.6232				4.02676			4.71706	4.79061	4.75383	0.0520047
0.419583	25.0915	27.9424	27.662				4.00588			4.71466	4.79229	4.75347	0.0548898
0.42	25.1039	28.0783	27.7298				4.01084			4.71355	4.79151	4.75253	0.0551255
0.420417	25.1958	27.8824	27.7311				4.00769			4.71553	4.79262	4.75407	0.0545107
0.420833	25.2127	27.9855	28.0256				4.03968			4.71769	4.79362	4.75566	0.0536887
0.42125	25.2138	28.1927	28.3107				3.99233			4.7222	4.79575	4.75897	0.0520044
0.421667	25.2805	28.2123	27.8962				3.99007			4.71862	4.79828	4.75845	0.0563313
0.422083	25.3819	28.3487	27.9087				4.00685			4.71751	4.79874	4.75812	0.0574368
0.4225	25.338	28.2833	28.0891				4.01007			4.71705	4.80347	4.76026	0.061111
0.422917	25.3108	28.3875	29.1188				4.0557			4.71962	4.80288	4.76125	0.0588721
0.423333	25.3506	28.5418	28.889				4.04374			4.71927	4.80583	4.76255	0.0612082
0.42375	25.3798	28.5018	28.7416				4.03044			4.72435	4.80788	4.76611	0.0590634
0.424167	25.3763	28.6624	28.3084				4.04501			4.72083	4.80654	4.76368	0.0606056
0.424583	25.4244	28.737	28.2371				4.00982			4.72164	4.80852	4.76508	0.0614336
0.425	25.4976	28.7118	28.1197				4.01234			4.72535	4.80926	4.7673	0.0593336
0.425417	25.5627	28.8115	28.0947				4.00092			4.72638	4.81093	4.76866	0.059792
0.425833	25.5969	28.5795	28.2088				3.99912			4.72952	4.81237	4.77094	0.0585872
0.42625	25.5917	28.611	28.2425				4.07855			4.73417	4.8115	4.77284	0.0546795
0.426667	25.5959	28.6212	28.439				4.01188			4.7368	4.81337	4.77508	0.0541399
0.427083	25.7	28.6781	28.5683				4.00865			4.73574	4.81377	4.77475	0.0551748
0.4275	25.6866	28.7299	29.6556				3.97797			4.73979	4.81549	4.77764	0.0535317
0.427917	25.67	28.8226	29.5863				3.93145			4.74075	4.81689	4.77882	0.0538349
0.428333	25.697	28.9581	29.3037				3.93746			4.73999	4.81888	4.77943	0.0557864
0.42875	25.7962	29.166	29.336				3.94559			4.74484	4.82325	4.78405	0.0554425
0.429167	25.8247	29.018	29.3009				3.97115			4.74482	4.82509	4.78496	0.0567605
0.429583	25.7866	28.7724	29.2696				4.01376			4.74871	4.82782	4.78827	0.0559413
0.43	25.8622	28.8661	29.329				3.98381			4.74942	4.83028	4.78985	0.0571759
0.430417	25.9045	28.9931	29.5387				3.99136			4.74803	4.83701	4.79252	0.0629172
0.430833	25.9786	29.0968	29.6132				3.95736			4.67337	4.84129	4.75733	0.118741
0.43125	26.0431	28.9147	29.5861				3.98663			4.70565	4.84474	4.77519	0.0983477
0.431667	25.9618	28.9179	29.6964				3.96004			4.71	4.84909	4.77955	0.0983512
0.432083	25.9962	29.0432	29.9659				4.56179			4.82819	4.86233	4.84526	0.0241456
0.4325	26.0865	29.32	30.0662				5.52448			10.0448	4.86696	7.4559	3.66131
0.432917	26.0683	29.1872	30.1191				5.00954			7.06963	7.15609	7.11286	0.0611324
0.433333	26.0397	29.3751	30.163				4.73933			6.08025	5.85118	5.96571	0.161975
0.43375	26.0506	29.2779	30.2834				4.65263			5.91062	5.4507	5.68066	0.325216
0.434167	26.0222	28.8749	30.4298				4.47922			5.7227	5.23065	5.47668	0.347933
0.434583	26.079	28.7751	30.8494				4.35789			5.51298	5.06632	5.28965	0.315834
0.435	26.1197	29.0537	31.0419				4.3287			5.28141	4.93728	5.10934	0.243336
0.435417	26.0781	29.1274	30.9662				4.21788			5.19527	4.83148	5.01338	0.257233
0.435833	26.0727	29.1996	30.906				4.19853			5.08416	4.74185	4.913	0.242049
0.43625	26.0956	29.4143	31.0245				4.15042			4.99682	4.66621	4.83152	0.233782
0.436667	26.116	29.4952	31.2114				4.10106			4.91957	4.59718	4.75838	0.227963
0.437083	26.156	29.3379	31.2538				4.09019			4.88112	4.54256	4.71184	0.239396
0.4375	26.0393	29.4042	31.5476				4.10511			4.84308	4.49192	4.6675	0.248307
0.437917	26.025	29.5756	31.7162				4.08792			4.80108	4.44505	4.62306	0.251756
0.438333	26.0203	29.5453	31.9739				4.10446			4.77951	4.40652	4.59302	0.26374
0.43875	25.9799	29.4891	31.9851				4.03253			4.75217	4.37167	4.56192	0.269051
0.439167	25.9857	29.1133	32.119				4.02822			4.72475	4.33813	4.53144	0.27338
0.439583	25.8904	29.4757	32.3305				4.00432			4.6841	4.30448	4.49429	0.268432
0.44	25.9109	29.4092	32.3521				3.96954			4.65572	4.27608	4.4659	0.268447
0.440417	25.7875	29.4574	32.3553				3.93324			4.63459	4.24977	4.44218	0.272113
0.440833	25.6999	29.211	32.4864				3.93494			4.60756	4.2281	4.41783	0.268321
0.44125	25.5788	29.293	33.0364				3.92202			4.59286	4.20875	4.4008	0.271609
0.441667	25.5067	29.4248	32.5391				3.88497			4.58154	4.19249	4.38701	0.275095
0.442083	25.5158	29.5006	32.1745				3.92582			4.56342	4.17869	4.37105	0.272045
0.4425	25.407	29.6082	31.9571				3.88924			4.54635	4.16325	4.3548	0.270892
0.442917	25.4318	29.724	31.7936				3.92546			4.5378	4.14793	4.34286	0.275685
0.443333	25.3209	30.0393	31.7404				3.89142			4.53183	4.13525	4.33354	0.280423
0.44375	25.2706	30.0469	31.6868				3.85406			4.50902	4.12268	4.31585	0.273179
0.444167	25.2429	30.1656	31.7545				3.80678			4.49664	4.10881	4.30273	0.274237
0.444583	25.2162	30.1998	31.7999				3.8271			4.48068	4.09927	4.28997	0.269696
0.445	25.1969	30.2466	31.9057				3.82973			4.46802	4.08727	4.27764	0.269233
0.445417	25.2296	30.4407	31.9664				3.80596			4.46293	4.07871	4.27082	0.271685
0.445833	25.2645	30.1033	31.977				3.80392			4.3832	4.07025	4.22673	0.221294
0.44625	25.3095	30.4501	32.8672				3.78686			4.40849	4.06058	4.23453	0.246011
0.446667	25.2937	30.2655	32.6648				3.76014			4.42092	4.05251	4.23672	0.260507
0.447083	25.2876	30.1407	32.5335				3.73121			4.44917	4.04633	4.24775	0.284851
0.4475	25.3054	30.201	32.4546				3.74058			4.46328	4.03866	4.25097	0.30025
0.447917	25.3853	30.3813	32.3358				3.72357			4.47056	4.03255	4.25155	0.309717
0.448333	25.4267	30.5566	32.2164				3.71083			4.46737	4.02509	4.24623	0.312733
0.44875	25.3577	30.5068	32.2046				3.70673			4.46351	4.01892	4.24122	0.314371
0.449167	25.3504	30.35	32.2162				3.66777			4.45879	4.01631	4.23755	0.312876
0.449583	25.3856	30.2986	32.2297				3.66457			4.44839	4.00832	4.22835	0.311174
0.45	25.441	30.2778	32.2309				3.66727			4.44179	4.00268	4.22223	0.310502
0.450417	25.4991	30.3685	32.2186				3.61168			4.43475	3.99927	4.21701	0.307928
0.450833	25.4878	30.7237	32.2534				3.61731			4.4212	3.99464	4.20792	0.30162
0.45125	25.596	30.8493	32.2818				3.63752			4.41616	3.99109	4.20362	0.300572
0.451667	25.609	30.9925	32.2862				3.64151			4.4031	3.98854	4.19582	0.29314
0.452083	25.6031	31.1761	32.3476				3.65695			4.41069	3.98583	4.19826	0.300424
0.4525	25.6107	31.3049	32.4654				3.61827			4.40873	3.98198	4.19536	0.301756
0.452917	25.6745	30.9414	32.9872				3.58519			4.41029	3.98003	4.19516	0.304245
0.453333	25.7352	31.0108	33.6302				3.62151			4.41985	3.9773	4.19858	0.312924
0.45375	25.7518	30.9816	33.1449				3.57489			4.42169	3.97773	4.19971	0.313922
0.454167	25.7264	30.5568	32.8632				3.56914			4.42515	3.97462	4.19989	0.318568
0.454583	25.806	30.6308	32.7249				3.56867			4.42116	3.97394	4.19755	0.316234
0.455	25.8217	30.8156	32.6178				3.58385			4.41896	3.97051	4.19474	0.317099
0.455417	25.7916	31.305	32.4257				3.56194			4.42075	3.96982	4.19529	0.318856
0.455833	25.8403	31.2354	32.2909				3.57885			4.41782	3.96876	4.19329	0.31753
0.45625	25.8718	31.1759	32.2559				3.59854			4.41679	3.96934	4.19306	0.316397
0.456667	25.9269	30.9528	32.2639				3.63563			4.41965	3.96913	4.19439	0.318566
0.457083	25.9893	31.0596	32.2267				3.61014			4.43078	3.96613	4.19845	0.328557
0.4575	25.9809	31.316	32.3811				3.59529			4.43052	3.96498	4.19775	0.329189
0.457917	26.0184	31.2441	32.3442				3.57607			4.43414	3.96218	4.19816	0.333723
0.458333	26.0028	31.0243	32.1618				3.56795			4.43419	3.96479	4.19949	0.331916
0.45875	26.0918	30.9974	32.0652				3.55531			4.44107	3.96314	4.2021	0.337949
0.459167	26.0802	30.9936	32.0644				3.56818			4.43526	3.9625	4.19888	0.334294
0.459583	26.179	30.8282	31.9814				3.52615			4.42752	3.96308	4.1953	0.328407
0.46	26.1409	31.0144	31.9564				3.55747			4.42513	3.96017	4.19265	0.328782
0.460417	26.1992	31.1603	31.893				3.55179			4.43306	3.95836	4.19571	0.33566
0.460833	26.2303	31.4758	31.9871				3.54478			4.42967	3.95947	4.19457	0.332481
0.46125	26.2736	31.6853	31.9806				3.51348			4.42729	3.95837	4.19283	0.331578
0.461667	26.2759	31.7819	32.261				3.54837			4.42795	3.9569	4.19243	0.333079
0.462083	26.2338	31.7851	32.9255				3.53892			4.42783	3.95509	4.19146	0.334274
0.4625	26.3276	31.6225	32.7412				3.5652			4.43073	3.95596	4.19335	0.335716
0.462917	26.3079	31.5114	32.7641				3.53898			4.42429	3.95517	4.18973	0.331716
0.463333	26.367	31.5493	32.8183				3.51584			4.42437	3.95807	4.19122	0.32973
0.46375	26.3693	31.7115	32.9376				3.50278			4.41246	3.95738	4.18492	0.321787
0.464167	26.4666	31.6745	32.7692				3.52338			4.41891	3.9566	4.18775	0.326901
0.464583	26.422	31.5995	32.7674				3.49242			4.4256	3.95487	4.19024	0.332859
0.465	26.5246	31.7566	32.857				3.52906			4.41538	3.95629	4.18584	0.324627
0.465417	26.5321	31.8292	32.6604				3.53844			4.41659	3.95597	4.18628	0.325712
0.465833	26.5364	31.6962	32.5309				3.51878			4.41732	3.95794	4.18763	0.32483
0.46625	26.4999	31.7721	32.5742				3.54749			4.41756	3.95772	4.18764	0.325156
0.466667	26.6524	31.9503	32.708				3.53346			4.41485	3.95682	4.18583	0.323871
0.467083	26.6252	31.668	33.5314				3.53695			4.41151	3.95651	4.18401	0.321735
0.4675	26.6827	31.7679	33.4				3.52727			4.40841	3.95787	4.18314	0.318583
0.467917	26.6807	31.654	33.4102				3.53555			4.40508	3.95872	4.1819	0.315626
0.468333	26.7301	31.5751	33.4975				3.52086			4.40329	3.9593	4.18129	0.313944
0.46875	26.787	31.7207	33.5801				3.51691			4.40844	3.95945	4.18395	0.31748
0.469167	26.7798	32.083	33.5241				3.61273			4.41664	3.96231	4.18947	0.321258
0.469583	26.8133	32.3368	33.4404				3.57968			4.4151	3.96078	4.18794	0.32125
0.47	26.8508	32.5126	33.6064				3.64049			4.41942	3.96136	4.19039	0.3239
0.470417	26.8832	32.3267	33.3183				3.63286			4.42333	3.9587	4.19101	0.328541
0.470833	26.9181	32.2678	33.19				3.67523			4.4322	3.96207	4.19714	0.332434
0.47125	26.8991	32.3841	33.123				3.66555			4.43069	3.96036	4.19553	0.332573
0.471667	26.9678	32.1374	33.1529				3.6556			4.42651	3.96135	4.19393	0.328918
0.472083	26.9417	31.9002	33.3267				3.67485			4.4261	3.96212	4.19411	0.328082
0.4725	27.0178	31.9709	33.492				3.64805			4.42712	3.96383	4.19547	0.32759
0.472917	26.9522	32.0778	33.7773				3.64381			4.42664	3.96731	4.19698	0.324791
0.473333	27.0427	32.1418	33.7183				3.65166			4.43118	3.96702	4.1991	0.328209
0.47375	27.0315	32.4162	34.0386				3.70615			4.43367	3.96775	4.20071	0.329459
0.474167	27.0294	32.5415	34.2104				3.68496			4.43272	3.96844	4.20058	0.328298
0.474583	27.1029	32.5264	34.4648				3.69769			4.43196	3.97049	4.20123	0.326312
0.475	27.1129	32.5861	34.4222				3.68906			4.43001	3.96873	4.19937	0.326176
0.475417	27.1316	32.6181	34.3409				3.69949			4.43041	3.96886	4.19964	0.32636
0.475833	27.1171	32.4696	34.1752				3.62061			4.43239	3.96875	4.20057	0.327838
0.47625	27.1603	32.4113	34.08				3.61635			4.43245	3.97101	4.20173	0.326286
0.476667	27.2371	32.3352	34.0542				3.63005			4.43578	3.9736	4.20469	0.326812
0.477083	27.2139	32.4863	34.1348				3.60006			4.43079	3.97585	4.20332	0.32169
0.4775	27.2982	32.458	34.035				3.58672			4.43393	3.97713	4.20553	0.323002
0.477917	27.3373	32.277	34.0398				3.60009			4.43221	3.9757	4.20396	0.322807
0.478333	27.3691	32.2458	34.1095				3.61221			4.42897	3.9776	4.20329	0.319169
0.47875	27.4154	32.2698	35.1578				3.63492			4.4322	3.97861	4.20541	0.320739
0.479167	27.4385	32.2422	34.9616				3.59067			4.4329	3.97818	4.20554	0.32154
0.479583	27.4236	32.1915	34.6773				3.58039			4.43695	3.98037	4.20866	0.322851
0.48	27.4809	31.565	34.5124				3.59361			4.4385	3.98117	4.20984	0.323378
0.480417	27.5417	31.6928	34.4331				3.58124			4.44436	3.98374	4.21405	0.32571
0.480833	27.5409	31.6997	34.435				3.54997			4.45611	3.98178	4.21895	0.335399
0.48125	27.4894	31.5794	34.4282				3.47389			4.45651	3.98298	4.21975	0.334839
0.481667	27.5261	31.5511	34.5461				3.49464			4.45386	3.98321	4.21854	0.332795
0.482083	27.606	31.5555	34.8184				3.49163			4.46219	3.98867	4.22543	0.334825
0.4825	27.6986	31.6154	34.7513				3.4713			4.46387	3.98948	4.22668	0.33545
0.482917	27.7062	31.5637	34.7511				3.46057			4.46384	3.9903	4.22707	0.334842
0.483333	27.6906	31.3828	34.7347				3.54395			4.46345	3.99087	4.22716	0.334161
0.48375	27.8102	31.2418	34.9031				3.48831			4.46572	3.99264	4.22918	0.334522
0.484167	27.819	31.2123	34.9248				3.50287			4.46956	3.99355	4.23155	0.336583
0.484583	27.8083	31.1875	35.8353				3.53568			4.46439	3.99637	4.23038	0.330938
0.485	27.874	31.2636	35.7648				3.49616			4.4616	3.99677	4.22918	0.328684
0.485417	27.9342	31.1126	35.7979				3.4912			4.46665	3.99588	4.23127	0.332889
0.485833	27.9257	31.1807	35.7956				3.47843			4.46818	3.99764	4.23291	0.332723
0.48625	27.9446	31.4608	35.8905				3.45775			4.4634	4.00056	4.23198	0.327278
0.486667	28.061	31.3527	35.8949				3.49009			4.46691	4.00151	4.23421	0.329088
0.487083	28.0253	31.6552	35.9736				3.4659			4.46938	4.00246	4.23592	0.330163
0.4875	28.0393	31.6993	35.9376				3.42352			4.46913	4.00504	4.23708	0.328161
0.487917	28.0664	31.7708	35.8624				3.43609			4.4666	4.00664	4.23662	0.325241
0.488333	28.114	32.0575	35.7737				3.46498			4.46452	4.00709	4.23581	0.323455
0.48875	28.1047	32.0654	35.7029				3.50716			4.46628	4.00681	4.23655	0.324893
0.489167	28.149	31.9485	35.7406				3.4578			4.46841	4.00945	4.23893	0.324536
0.489583	28.1857	31.9837	35.8507				3.51348			4.46651	4.01395	4.24023	0.320007
0.49	28.2567	32.0785	36.0526				3.4384			4.46768	4.01545	4.24156	0.319777
0.490417	28.2355	31.9224	36.2629				3.4409			4.4664	4.0167	4.24155	0.31799
0.490833	28.2087	31.8114	36.4585				3.46742			4.46904	4.01738	4.24321	0.31937
0.49125	28.2595	31.3975	36.5274				3.44104			4.47366	4.01856	4.24611	0.321801
0.491667	28.2865	31.76	36.685				3.44212			4.47319	4.0204	4.24679	0.320172
0.492083	28.2796	31.7406	36.587				3.48189			4.46874	4.02198	4.24536	0.315906
0.4925	28.3088	31.8291	36.4892				3.44649			4.46802	4.02238	4.2452	0.315117
0.492917	28.3733	32.1297	36.4085				3.4136			4.46982	4.02416	4.24699	0.315129
0.493333	28.4347	32.3286	36.3172				3.40174			4.46985	4.02672	4.24828	0.313344
0.49375	28.3967	32.2386	36.3664				3.43701			4.47657	4.02519	4.25088	0.319169
0.494167	28.3419	32.078	36.4602				3.45061			4.48248	4.02691	4.2547	0.322142
0.494583	28.416	31.9892	36.4311				3.4768			4.48572	4.02971	4.25771	0.322449
0.495	28.422	31.8584	36.6044				3.45715			4.48701	4.03335	4.26018	0.320784
0.495417	28.4234	32.0448	36.6669				3.42605			4.49373	4.03377	4.26375	0.325244
0.495833	28.459	32.34	36.6757				3.45976			4.49869	4.03209	4.26539	0.329933
0.49625	28.4706	32.417	36.7502				3.42483			4.49903	4.03527	4.26715	0.327926
0.496667	28.5299	32.4925	36.9575				3.426			4.49795	4.0359	4.26692	0.326717
0.497083	28.4774	32.3477	37.1959				3.41466			4.49902	4.03758	4.2683	0.326291
0.4975	28.4837	32.32	37.2522				3.45863			4.50282	4.03986	4.27134	0.327364
0.497917	28.5418	32.4525	38.0061				3.40925			4.49785	4.03942	4.26864	0.324163
0.498333	28.4718	32.5521	37.8349				3.40549			4.50312	4.04185	4.27248	0.326169
0.49875	28.5211	32.1488	37.7641				3.41224			4.50246	4.04327	4.27287	0.324698
0.499167	28.5257	32.0398	37.6789				3.43113			4.50325	4.04343	4.27334	0.325136
0.499583	28.5474	32.1962	37.7301				3.42947			4.50428	4.0444	4.27434	0.325183
0.5	28.5527	32.1895	37.6809				3.41892			4.50103	4.04488	4.27296	0.322544
0.500417	28.5997	32.2937	37.7699				3.52238			4.49433	4.04672	4.27052	0.316505
0.500833	28.5721	32.3277	37.6539				3.48589			4.49368	4.04771	4.27069	0.315351
0.50125	28.6702	32.5207	37.5791				3.50742			4.49946	4.0496	4.27453	0.318098
0.501667	28.7018	32.6586	37.428				3.51928			4.5032	4.05188	4.27754	0.31913
0.502083	28.6608	32.9633	37.3585				3.5128			4.50004	4.05148	4.27576	0.317185
0.5025	28.7289	32.5317	37.416				3.5085			4.5052	4.05399	4.2796	0.319049
0.502917	28.7556	32.6518	37.3859				3.5175			4.51536	4.05277	4.28406	0.327102
0.503333	28.7989	32.689	37.4108				3.5176			4.5198	4.05669	4.28824	0.32747
0.50375	28.7904	32.6627	37.4797				3.47301			4.52074	4.05927	4.29001	0.326312
0.504167	28.7606	32.5966	37.6638				3.50237			4.52032	4.06109	4.29071	0.324719
0.504583	28.8468	32.2185	37.6394				3.51792			4.52459	4.0618	4.2932	0.327243
0.505	28.8716	32.7984	37.6615				3.59203			4.5299	4.06186	4.29588	0.33095
0.505417	28.9088	32.9474	37.8343				3.57776			4.52644	4.06419	4.29531	0.326859
0.505833	28.919	33.2187	37.7734				3.56996			4.53286	4.0613	4.29708	0.333446
0.50625	28.9207	33.3536	38.0039				3.54373			4.53916	4.06472	4.30194	0.335482
0.506667	28.8956	33.4266	37.9758				3.5539			4.5476	4.06608	4.30684	0.34048
0.507083	28.8984	33.4384	38.0575				3.5766			4.55277	4.06607	4.30942	0.344151
0.5075	28.9552	33.5415	38.0441				3.57252			4.54833	4.0696	4.30896	0.338513
0.507917	29.0189	33.5824	38.0305				3.52742			4.5644	4.06981	4.31711	0.349723
0.508333	29.0188	33.8316	38.1239				3.56224			4.56877	4.07243	4.3206	0.350966
0.50875	29.0749	33.7601	38.1677				3.52122			4.55812	4.07206	4.31509	0.343702
0.509167	29.0595	33.7452	38.2524				3.54013			4.55306	4.07478	4.31392	0.338194
0.509583	29.0609	33.6648	38.2831				3.5593			4.55134	4.07445	4.31289	0.337212
0.51	29.0838	33.7188	38.2038				3.51665			4.55536	4.07515	4.31525	0.33956
0.510417	29.1101	34.042	38.2128				3.52258			4.55663	4.07656	4.31659	0.339464
0.510833	29.0921	34.0465	38.3114				3.53875			4.55325	4.07996	4.3166	0.334665
0.51125	29.1068	33.7978	38.3041				3.49689			4.55241	4.07914	4.31577	0.334656
0.511667	29.1041	33.3695	39.4043				3.49288			4.54701	4.08076	4.31388	0.329689
0.512083	29.1606	33.7129	39.2143				3.54173			4.54044	4.08342	4.31193	0.323162
0.5125	29.1753	33.5593	39.1077				3.48055			4.54216	4.08464	4.3134	0.323511
0.512917	29.2507	33.4461	39.0797				3.47303			4.54247	4.08701	4.31474	0.322062
0.513333	29.1352	33.238	39.1362				3.47059			4.53705	4.08624	4.31165	0.31877
0.51375	29.1134	33.3006	39.1917				3.51014			4.54236	4.08961	4.31599	0.320142
0.514167	29.1187	33.5803	39.2266				3.53269			4.54343	4.08695	4.31519	0.322778
0.514583	29.1734	33.7475	39.35				3.48847			4.53499	4.09295	4.31397	0.312572
0.515	29.1613	33.936	39.3819				3.52442			4.53573	4.09308	4.31441	0.313004
0.515417	29.2493	33.9915	39.4554				3.54825			4.53678	4.09419	4.31549	0.312956
0.515833	29.2491	34.036	39.54				3.51755			4.53737	4.09515	4.31626	0.312699
0.51625	29.2463	34.1188	39.6504				3.53562			4.5406	4.0979	4.31925	0.313034
0.516667	29.3339	34.4054	39.6321				3.5563			4.54218	4.09821	4.3202	0.313932
0.517083	29.3398	34.3211	39.6561				3.55237			4.55019	4.10046	4.32533	0.318006
0.5175	29.3015	33.5462	39.5926				3.50312			4.54832	4.10227	4.3253	0.315402
0.517917	29.3126	33.5487	39.6021				3.50378			4.54565	4.10162	4.32363	0.313982
0.518333	29.3135	33.5273	39.6758				3.54069			4.55175	4.10598	4.32887	0.31521
0.51875	29.2888	33.6696	39.542				3.48516			4.55673	4.10546	4.3311	0.319095
0.519167	29.354	33.763	39.5153				3.43889			4.55976	4.10685	4.3333	0.32025
0.519583	29.3862	33.7015	39.5712				3.47736			4.5598	4.10823	4.33401	0.319311
0.52	29.415	33.6329	39.5357				3.50385			4.5645	4.10973	4.33712	0.321571
0.520417	29.3656	33.4953	39.5624				3.48199			4.56582	4.11019	4.33801	0.322179
0.520833	29.3852	33.5762	39.5345				3.44793			4.56531	4.11359	4.33945	0.319411
0.52125	29.5063	33.8794	39.6176				3.46788			4.56599	4.11575	4.34087	0.318369
0.521667	29.4736	33.8317	39.5909				3.46818			4.56146	4.11335	4.33741	0.316863
0.522083	29.5283	33.8439	39.6277				3.47214			4.55805	4.1156	4.33682	0.312858
0.5225	29.6022	33.9248	39.7315				3.43987			4.55898	4.11901	4.339	0.311106
0.522917	29.5104	34.1929	39.7865				3.45467			4.56242	4.12026	4.34134	0.312656
0.523333	29.5745	33.9713	39.8427				3.48436			4.56687	4.12003	4.34345	0.31596
0.52375	29.5775	34.0429	39.9323				3.45655			4.56743	4.11942	4.34342	0.316795
0.524167	29.5842	34.3227	40.0556				3.45993			4.57165	4.12059	4.34612	0.318948
0.524583	29.5619	34.6097	40.1999				3.45179			4.56888	4.12301	4.34594	0.315282
0.525	29.5484	34.6677	40.26				3.44101			4.56724	4.12638	4.34681	0.311733
0.525417	29.5138	34.4821	40.1887				3.44965			4.57113	4.12861	4.34987	0.312912
0.525833	29.5941	34.3765	40.1192				3.46374			4.57399	4.12957	4.35178	0.314248
0.52625	29.6085	34.5184	40.1843				3.44988			4.58248	4.13068	4.35658	0.319467
0.526667	29.618	34.4834	40.153				3.44043			4.59068	4.13193	4.36131	0.324386
0.527083	29.6843	34.4853	40.1694				3.38008			4.59846	4.13209	4.36528	0.329775
0.5275	29.6238	34.4863	40.2461				3.4367			4.60463	4.13281	4.36872	0.33363
0.527917	29.6987	34.4503	41.0465				3.41164			4.60514	4.13505	4.3701	0.332409
0.528333	29.6809	34.4817	41.0129				3.39946			4.60431	4.13599	4.37015	0.331148
0.52875	29.6472	34.1483	40.9747				3.45285			4.60935	4.13687	4.37311	0.334089
0.529167	29.6679	34.261	41.1305				3.38874			4.61036	4.14047	4.37542	0.332266
0.529583	29.7389	34.7507	41.4437				3.36029			4.60483	4.13991	4.37237	0.328745
0.53	29.8046	34.7704	41.3738				3.41313			4.60354	4.14089	4.37222	0.327141
0.530417	29.8001	34.5939	41.5304				3.42206			4.60679	4.14356	4.37517	0.327554
0.530833	29.8261	34.4604	41.4404				3.41886			4.60454	4.14182	4.37318	0.327196
0.53125	29.8871	34.5028	41.2567				3.42104			4.61254	4.14158	4.37706	0.333016
0.531667	29.7773	34.5211	40.978				3.39543			4.6116	4.14444	4.37802	0.330328
0.532083	29.8341	34.578	40.8566				3.38404			4.60847	4.14256	4.37552	0.329453
0.5325	29.8496	34.5533	40.9235				3.37369			4.61623	4.14777	4.382	0.331248
0.532917	29.8192	34.6362	41.0798				3.39571			4.61257	4.14756	4.38006	0.328808
0.533333	29.888	33.9956	40.9603				3.42004			4.61501	4.14733	4.38117	0.330698
0.53375	29.909	34.4879	40.9225				3.41395			4.60773	4.14813	4.37793	0.324983
0.534167	29.8849	34.5189	41.0237				3.42972			4.60914	4.15339	4.38126	0.322264
0.534583	29.9302	34.7453	41.5498				3.4073			4.60864	4.15421	4.38143	0.321331
0.535	29.85	34.6296	41.371				3.38398			4.6093	4.15505	4.38217	0.321206
0.535417	29.8806	34.644	41.4827				3.40659			4.60887	4.15583	4.38235	0.320353
0.535833	29.9714	34.5802	41.3891				3.44316			4.61548	4.15711	4.38629	0.324113
0.53625	29.9075	34.7508	41.358				3.40011			4.62065	4.15948	4.39006	0.326099
0.536667	29.9732	34.9522	41.235				3.39959			4.61985	4.1596	4.38973	0.325445
0.537083	30.065	34.7098	41.4424				3.46755			4.61536	4.1616	4.38848	0.320861
0.5375	30.0471	34.7379	41.3196				3.4202			4.61969	4.16333	4.39151	0.322694
0.537917	29.9157	34.9216	41.6596				3.38348			4.62181	4.16469	4.39325	0.323234
0.538333	29.8685	34.7823	42.2793				3.39777			4.62075	4.16761	4.39418	0.32042
0.53875	30.0164	34.8839	41.9116				3.42371			4.62537	4.1679	4.39664	0.323479
0.539167	29.9401	34.8942	41.9057				3.41279			4.62879	4.16757	4.39818	0.326136
0.539583	29.9962	34.908	41.901				3.45523			4.62837	4.16699	4.39768	0.326248
0.54	30.0195	35.1609	41.9363				3.43063			4.63222	4.16763	4.39992	0.328511
0.540417	30.0628	35.2007	41.8408				3.39337			4.63427	4.17014	4.4022	0.328196
0.540833	29.9932	34.8557	41.8146				3.42313			4.64077	4.17283	4.4068	0.330885
0.54125	30.076	34.745	41.8951				3.42119			4.64753	4.17198	4.40976	0.336266
0.541667	30.0562	34.6885	41.7907				3.44029			4.6502	4.17421	4.41221	0.33658
0.542083	30.1061	34.8394	41.9513				3.42642			4.65341	4.1755	4.41445	0.337928
0.5425	30.0581	35.1119	41.8694				3.41382			4.66708	4.17624	4.42166	0.347077
0.542917	30.0638	35.4092	41.7167				3.4184			4.67844	4.18183	4.43014	0.351159
0.543333	30.0598	35.4096	41.649				3.45109			4.67873	4.18105	4.42989	0.351916
0.54375	30.0991	35.433	41.7382				3.44411			4.68022	4.1813	4.43076	0.35279
0.544167	30.0645	35.408	41.8951				3.41136			4.68076	4.18352	4.43214	0.351599
0.544583	30.1003	35.391	42.1043				3.46532			4.68048	4.18384	4.43216	0.351178
0.545	30.0242	35.1166	42.6437				3.44724			4.68256	4.18537	4.43396	0.351566
0.545417	30.0957	34.7623	42.7468				3.38399			4.68118	4.1843	4.43274	0.35135
0.545833	30.144	35.0509	42.6354				3.32534			4.67769	4.18674	4.43222	0.347159
0.54625	30.124	35.3521	42.6316				3.38612			4.68107	4.18566	4.43336	0.350309
0.546667	30.1293	34.8675	42.6164				3.40411			4.67893	4.18477	4.43185	0.349418
0.547083	30.1574	34.8212	42.529				3.36763			4.68205	4.18839	4.43522	0.349068
0.5475	30.1322	34.9878	42.3876				3.35			4.67668	4.1924	4.43454	0.342435
0.547917	30.0992	35.2023	42.3124				3.41056			4.67165	4.19161	4.43163	0.339439
0.548333	30.1708	35.3436	42.2009				3.37828			4.6714	4.19416	4.43278	0.337455
0.54875	30.1368	35.3736	42.2115				3.42192			4.66898	4.19704	4.43301	0.333712
0.549167	30.1653	35.2405	42.4006				3.40196			4.67723	4.20133	4.43928	0.33651
0.549583	30.2015	35.3768	42.5361				3.41093			4.68037	4.19841	4.43939	0.3408
0.55	30.2154	35.6143	42.5118				3.37847			4.68901	4.19809	4.44355	0.347135
0.550417	30.2102	35.3764	42.5392				3.3772			4.68582	4.198	4.44191	0.34494
0.550833	30.2011	35.4046	42.4742				3.41019			4.69307	4.19985	4.44646	0.348757
0.55125	30.1996	35.2808	42.4314				3.41003			4.69243	4.20292	4.44768	0.346132
0.551667	30.244	35.4703	42.4554				3.41453			4.69289	4.20129	4.44709	0.34761
0.552083	30.2311	35.3804	42.3974				3.4377			4.69944	4.20256	4.451	0.351344
0.5525	30.2403	35.5758	42.3912				3.43636			4.70664	4.20387	4.45525	0.355514
0.552917	30.2594	35.4785	42.5419				3.47069			4.71543	4.20351	4.45947	0.361986
0.553333	30.3236	35.1169	42.58				3.48861			4.72533	4.20646	4.4659	0.366898
0.55375	30.3453	35.2356	42.5473				3.46355			4.72869	4.20762	4.46816	0.368452
0.554167	30.3452	35.1037	42.6641				3.46216			4.73992	4.20916	4.47454	0.375307
0.554583	30.3876	34.8288	42.734				3.46061			4.74241	4.21061	4.47651	0.376037
0.555	30.3411	34.5237	42.785				3.50161			4.75035	4.20931	4.47983	0.382568
0.555417	30.2943	34.4478	43.0441				3.50813			4.75937	4.21071	4.48504	0.38796
0.555833	30.298	34.1597	43.2265				3.50317			4.76469	4.21338	4.48904	0.389832
0.55625	30.3155	34.3269	43.3633				3.48816			4.76791	4.21422	4.49107	0.391513
0.556667	30.2477	34.7407	43.2844				3.48418			4.77197	4.21277	4.49237	0.395412
0.557083	30.3329	34.5589	42.9722				3.47313			4.77993	4.21775	4.49884	0.397517
0.5575	30.381	34.4528	43.0061				3.4544			4.77755	4.2188	4.49818	0.395098
0.557917	30.3217	34.628	43.0836				3.46006			4.78294	4.21627	4.49961	0.400697
0.558333	30.3511	34.5288	42.9994				3.46848			4.79588	4.21885	4.50737	0.40802
0.55875	30.3359	34.282	42.9246				3.49605			4.80197	4.22153	4.51175	0.410428
0.559167	30.3219	34.4238	42.9748				3.51715			4.80352	4.22315	4.51333	0.410383
0.559583	30.3141	34.1351	43.1122				3.50089			4.81652	4.22431	4.52041	0.418754
0.56	30.4259	34.6289	44.3496				3.47526			4.82545	4.22726	4.52635	0.422985
0.560417	30.4383	34.2321	44.5539				3.50132			4.82147	4.22872	4.5251	0.41914
0.560833	30.4928	34.3415	44.1272				3.51647			4.82713	4.22809	4.52761	0.423585
0.56125	30.4282	34.3441	43.8995				3.46657			4.82528	4.22896	4.52712	0.421661
0.561667	30.4472	34.6637	43.7161				3.4551			4.83195	4.22851	4.53023	0.426694
0.562083	30.5072	34.9224	43.6229				3.44855			4.83817	4.23155	4.53486	0.428944
0.5625	30.5561	34.3568	43.5451				3.49764			4.83636	4.23089	4.53362	0.428134
0.562917	30.5061	33.9642	43.443				3.48478			4.83104	4.23444	4.53274	0.421856
0.563333	30.443	34.0392	43.4183				3.44732			4.83823	4.23467	4.53645	0.426784
0.56375	30.4628	34.4385	43.5256				3.44126			4.83907	4.24056	4.53981	0.42321
0.564167	30.4531	34.2274	43.5389				3.4717			4.83862	4.24042	4.53952	0.422994
0.564583	30.4408	34.1218	43.6262				3.4479			4.836	4.24129	4.53865	0.420526
0.565	30.4562	34.1176	43.9523				3.45439			4.83263	4.24335	4.53799	0.416685
0.565417	30.5099	34.594	44.1724				3.40974			4.82911	4.24666	4.53788	0.411855
0.565833	30.5576	34.1823	44.0222				3.47448			4.83658	4.24546	4.54102	0.417986
0.56625	30.6085	33.9921	43.9291				3.44958			4.84009	4.24422	4.54216	0.421346
0.566667	30.5185	34.7249	43.7772				3.4168			4.84349	4.24784	4.54566	0.421185
0.567083	30.5545	34.5447	43.7355				3.42717			4.84197	4.24909	4.54553	0.419231
0.5675	30.5948	34.6107	43.8742				3.47908			4.84675	4.24996	4.54835	0.421995
0.567917	30.6351	34.342	43.8316				3.43278			4.85205	4.25216	4.5521	0.424193
0.568333	30.5984	34.6972	43.7657				3.46191			4.84518	4.25794	4.55156	0.415238
0.56875	30.5987	34.8896	43.8876				3.40616			4.84687	4.25505	4.55096	0.418477
0.569167	30.6129	35.1243	44.0106				3.42427			4.8614	4.25814	4.55977	0.426567
0.569583	30.6226	35.2542	43.9115				3.37356			4.85927	4.25942	4.55935	0.424158
0.57	30.6575	35.6475	43.7323				3.33482			4.86077	4.26011	4.56044	0.424732
0.570417	30.6581	35.1091	44.1195				3.33349			4.85854	4.26177	4.56015	0.421976
0.570833	30.6717	35.0623	44.7912				3.3746			4.86269	4.26064	4.56167	0.425714
0.57125	30.7025	35.2257	44.3081				3.32433			4.86761	4.26386	4.56573	0.426915
0.571667	30.7164	35.2281	44.1867				3.32749			4.86318	4.26357	4.56337	0.423987
0.572083	30.6663	35.2124	44.3051				3.33227			4.86533	4.26701	4.56617	0.423075
0.5725	30.6424	35.1493	44.3474				3.32475			4.86366	4.27023	4.56695	0.419617
0.572917	30.6664	35.3406	44.2337				3.30838			4.86577	4.27002	4.56789	0.421257
0.573333	30.622	35.4215	44.0942				3.38298			4.86922	4.26748	4.56835	0.425492
0.57375	30.6802	35.1647	44.1093				3.34354			4.86891	4.27061	4.56976	0.423065
0.574167	30.6804	34.7107	44.0658				3.31184			4.87345	4.27596	4.5747	0.422485
0.574583	30.7061	34.5911	44.196				3.34184			4.87451	4.27891	4.57671	0.421148
0.575	30.6861	34.6614	43.9669				3.33655			4.87265	4.27732	4.57498	0.420968
0.575417	30.7145	35.1967	44.0109				3.34121			4.87739	4.27692	4.57715	0.424591
0.575833	30.6773	35.3631	44.0859				3.30942			4.87288	4.27974	4.57631	0.419409
0.57625	30.6749	35.0598	44.0977				3.28745			4.87418	4.27964	4.57691	0.420407
0.576667	30.6852	35.6457	44.1738				3.28856			4.87438	4.2795	4.57694	0.420647
0.577083	30.7632	35.1765	44.0955				3.26815			4.86941	4.28252	4.57596	0.41499
0.5775	30.7659	35.2844	44.1317				3.30734			4.87731	4.28612	4.58172	0.418035
0.577917	30.7331	35.2772	44.251				3.31634			4.87046	4.28586	4.57816	0.413379
0.578333	30.7708	35.3332	44.3566				3.27277			4.87075	4.28361	4.57718	0.415169
0.57875	30.8986	34.9877	44.2614				3.31979			4.86816	4.28527	4.57672	0.412171
0.579167	30.8422	34.5424	44.2514				3.33645			4.8623	4.28937	4.57584	0.405122
0.579583	30.8396	34.6873	44.2706				3.30231			4.86718	4.2905	4.57884	0.40778
0.58	30.8437	34.6534	44.3825				3.24213			4.86244	4.29106	4.57675	0.404025
0.580417	30.8976	34.383	44.4092				3.29938			4.86194	4.29066	4.5763	0.403957
0.580833	30.8292	34.5014	44.3693				3.29187			4.86309	4.2948	4.57894	0.40184
0.58125	30.7604	34.4724	44.4035				3.26518			4.86829	4.29206	4.58018	0.40746
0.581667	30.8258	34.8639	44.621				3.27398			4.87093	4.29346	4.5822	0.408331
0.582083	30.8017	35.1647	44.7983				3.26522			4.86306	4.29628	4.57967	0.400773
0.5825	30.8585	35.1041	44.623				3.26557			4.86598	4.29603	4.58101	0.403015
0.582917	30.8876	34.6428	44.7277				3.26182			4.86547	4.29881	4.58214	0.40069
0.583333	78.5	35.8485	44.7887				3.25221			4.87183	4.30061	4.58622	0.403912
0.58375	-0.0025615	50.8726	45.5919				3.26029			4.87375	4.303	4.58837	0.403578
0.584167	2.01505e-05	92.7611	45.6439				3.28121			4.87585	4.30359	4.58972	0.404654
0.584583		48.0875	162.037				3.25426			4.8733	4.30548	4.58939	0.401513
0.585		43.8723	88.6251				3.28339			4.87809	4.30819	4.59314	0.402977
0.585417		41.8069	52.9675				3.29519			4.88218	4.30836	4.59527	0.405752
0.585833		40.5795	45.3904				3.29686			4.87939	4.30839	4.59389	0.403762
0.58625		39.4508	41.7134				3.28182			4.874	4.30744	4.59072	0.400615
0.586667		38.917	40.1108				3.33458			4.88304	4.3108	4.59692	0.404635
0.587083		35.4708	38.051				3.29001			4.87905	4.31208	4.59556	0.400905
0.5875		33.4394	36.2273				3.3063			4.87385	4.31374	4.5938	0.396055
0.587917		32.6632	35.228				3.24264			4.88153	4.31589	4.59871	0.399969
0.588333		32.0691	34.4833				3.28125			4.88834	4.31622	4.60228	0.404551
0.58875		31.7046	33.9433				3.2631			4.8911	4.31699	4.60405	0.40596
0.589167		31.3685	33.7796				3.27591			4.8937	4.31758	4.60564	0.407379
0.589583		31.1537	33.2962				3.34167			4.89673	4.3173	4.60701	0.409717
0.59		30.9189	32.9567				3.32008			4.90138	4.31812	4.60975	0.412423
0.590417		30.7262	32.5558				3.31317			4.90289	4.31895	4.61092	0.412912
0.590833		30.5941	32.246				3.31055			4.89983	4.31629	4.60806	0.412631
0.59125		30.4313	32.0689				3.29987			4.90255	4.32017	4.61136	0.411811
0.591667		30.268	31.8567				3.36507			4.90044	4.32146	4.61095	0.409394
0.592083		30.1116	31.7339				3.32237			4.8989	4.32285	4.61087	0.407332
0.5925		29.9345	31.5846				3.35823			4.89882	4.32258	4.6107	0.407461
0.592917		29.889	31.464				3.3765			4.90725	4.32133	4.61429	0.414307
0.593333		29.8653	31.5091				3.38704			4.905	4.32332	4.61416	0.41131
0.59375		29.8449	31.5103				3.32318			4.90316	4.32448	4.61382	0.409191
0.594167		29.7954	31.459				3.39033			4.90893	4.3261	4.61752	0.412119
0.594583		29.7789	31.4673				3.39032			4.91174	4.32503	4.61839	0.414863
0.595		29.7961	31.4423				3.38511			4.91573	4.32651	4.62112	0.416642
0.595417		29.7787	31.4097				3.40835			4.9133	4.32796	4.62063	0.413896
0.595833		29.7948	31.4551				3.38901			4.90767	4.33023	4.61895	0.408313
0.59625		29.7116	31.4878				3.42532			4.90775	4.32944	4.61859	0.408927
0.596667		29.7156	31.478				3.424			4.90487	4.32928	4.61707	0.407003
0.597083		29.5971	31.493				3.44047			4.90827	4.33186	4.62006	0.407583
0.5975		29.7368	32.0549				3.46506			4.91009	4.33504	4.62257	0.40662
0.597917		29.8531	32.5293				3.4545			4.91741	4.33248	4.62494	0.413611
0.598333		29.8652	32.3703				3.42878			4.91903	4.33588	4.62746	0.41235
0.59875		29.2422	32.3015				3.43182			4.91847	4.33475	4.62661	0.412747
0.599167		29.5197	32.5042				3.48482			4.91759	4.33476	4.62617	0.412119
0.599583		29.7759	32.5777				3.47789			4.91466	4.33799	4.62632	0.407767
0.6		29.8244	32.5369				3.49328			4.9123	4.3382	4.62525	0.40595
0.600417		29.9241	32.5254				3.46176			4.91531	4.33732	4.62631	0.408702
0.600833		29.933	32.5083				3.46696			4.91567	4.33867	4.62717	0.408001
0.60125		29.9183	32.5195				3.49552			4.91074	4.34061	4.62567	0.403146
0.601667		29.7422	32.59				3.50691			4.92122	4.33851	4.62986	0.412035
0.602083		29.7669	34.634				3.47667			4.92506	4.33798	4.63152	0.415134
0.6025		29.9144	36.6053				3.4945			4.92185	4.34129	4.63157	0.410517
0.602917		29.9617	-36.1838				3.48832			4.91527	4.34347	4.62937	0.404323
0.603333		30.1175	32.8985				3.46302			4.92173	4.34298	4.63236	0.409241
0.60375		30.1217	32.9158				3.39924			4.92204	4.34491	4.63347	0.408092
0.604167		30.1238	32.95				3.4209			4.92696	4.34492	4.63594	0.411568
0.604583		30.1108	32.8743				3.43912			4.9241	4.34453	4.63431	0.409816
0.605		30.1276	32.8989				3.43915			4.9248	4.34486	4.63483	0.410073
0.605417		30.2581	32.9464				3.39489			4.92018	4.34822	4.6342	0.40444
0.605833		30.2381	32.9683				3.37249			4.91731	4.34883	4.63307	0.401974
0.60625		30.2624	32.989				3.39771			4.92144	4.35175	4.63659	0.402835
0.606667		30.26	33.0238				3.41236			4.92628	4.3508	4.63854	0.406924
0.607083		30.2809	33.0372				3.40591			4.92129	4.35373	4.63751	0.401322
0.6075		30.3676	32.9979				3.39651			4.92439	4.35812	4.64125	0.400413
0.607917		30.3611	32.9171				3.44546			4.92823	4.35635	4.64229	0.404381
0.608333		30.3151	32.9639				3.42233			4.92981	4.35527	4.64254	0.406264
0.60875		30.3112	33.1403				3.36772			4.93423	4.35848	4.64635	0.407116
0.609167		30.2685	33.1384				3.35568			4.93043	4.35915	4.64479	0.403959
0.609583		30.2174	33.1437				3.35713			4.92837	4.36031	4.64434	0.401679
0.61		30.374	33.219				3.33468			4.93376	4.36338	4.64857	0.403315
0.610417		30.4198	33.2211				3.33244			4.93214	4.36571	4.64893	0.400528
0.610833		30.4569	33.2008				3.30299			4.93111	4.3679	4.64951	0.398251
0.61125		30.5035	34.9862				3.27376			4.93602	4.36958	4.6528	0.400532
0.611667		30.5729	52.4427				3.31927			4.93905	4.37333	4.65619	0.400021
0.612083		30.5146	33.3081				3.35173			4.937	4.37341	4.65521	0.39852
0.6125		30.4502	33.2999				3.29568			4.93947	4.37552	4.6575	0.398775
0.612917		30.5342	33.3672				3.27133			4.94407	4.37577	4.65992	0.401846
0.613333		30.5637	30.2668				3.26451			4.94327	4.37551	4.65939	0.40146
0.61375		30.5755	33.6481				3.25704			4.93698	4.37698	4.65698	0.395976
0.614167		30.6191	33.6242				3.30004			4.93668	4.37679	4.65674	0.395903
0.614583		30.5936	33.6735				3.29054			4.9393	4.3778	4.65855	0.39704
0.615		30.6782	33.8013				3.28353			4.94279	4.37971	4.66125	0.398156
0.615417		30.6253	24.4731				3.24839			4.94362	4.38118	4.6624	0.397706
0.615833		30.622	33.5997				3.28187			4.94701	4.38349	4.66525	0.398468
0.61625		30.6387	34.313				3.26331			4.94741	4.38317	4.66529	0.398977
0.616667		30.6271	33.469				3.28929			4.94783	4.38238	4.66511	0.399832
0.617083		30.6848	33.9338				3.25756			4.94929	4.38426	4.66677	0.399538
0.6175		30.4207	33.8246				3.29826			4.95735	4.38511	4.67123	0.404633
0.617917		30.6022	33.7513				3.23748			4.95408	4.389	4.67154	0.399568
0.618333		30.7307	33.7547				3.3379			4.94942	4.38608	4.66775	0.398348
0.61875		30.7591	33.8119				3.34033			4.9505	4.38655	4.66852	0.398773
0.619167		30.7818	33.8058				3.28737			4.95316	4.38804	4.6706	0.3996
0.619583		30.7708	33.7615				3.27529			4.96005	4.39122	4.67563	0.402224
0.62		30.706	33.8425				3.20284			4.9601	4.39081	4.67546	0.402543
0.620417		30.8582	33.842				3.23176			4.96335	4.39404	4.67869	0.402562
0.620833		30.8187	33.8844				3.2821			4.97015	4.39464	4.6824	0.40695
0.62125		30.8116	33.9624				3.25894			4.9654	4.39587	4.68063	0.402715
0.621667		30.8474	33.9387				3.26743			4.97267	4.39469	4.68368	0.40869
0.622083		30.8326	33.9198				3.25765			4.9775	4.39765	4.68757	0.410019
0.6225		30.9298	34.0958				3.21805			4.98118	4.3991	4.69014	0.411595
0.622917		30.9126	33.9117				3.2304			4.98585	4.40125	4.69355	0.413373
0.623333		30.8616	33.8081				3.26395			4.98481	4.40357	4.69419	0.410998
0.62375		30.8418	33.8141				3.25466			4.98557	4.40039	4.69298	0.413784
0.624167		30.8461	33.8321				3.18769			4.9894	4.40294	4.69617	0.414692
0.624583		30.8769	33.9095				3.23782			4.98457	4.4052	4.69489	0.409681
0.625		30.976	33.9399				3.20784			4.9868	4.40376	4.69528	0.41227
0.625417		30.597	33.8891				3.26255			4.99801	4.40477	4.70139	0.41948
0.625833		30.7846	33.899				3.27387			5.00106	4.40655	4.70381	0.420382
0.62625		30.8873	33.9751				3.21343			5.00943	4.40634	4.70788	0.426444
0.626667		31.0221	33.9958				3.1786			5.02345	4.40907	4.71626	0.434435
0.627083		31.0412	34.0816				3.21006			5.03097	4.40879	4.71988	0.439951
0.6275		31.0791	34.0498				3.23677			5.02673	4.4076	4.71716	0.437786
0.627917		30.4523	33.9971				3.25695			5.02538	4.40906	4.71722	0.435803
0.628333		30.8993	34.0004				3.25577			5.02277	4.41094	4.71685	0.432624
0.62875		31.0053	34.0837				3.23075			5.02464	4.41142	4.71803	0.433612
0.629167		31.0632	34.1029				3.24874			5.03187	4.41223	4.72205	0.438149
0.629583		31.1132	34.1426				3.22843			5.02796	4.41333	4.72065	0.434606
0.63		30.9821	34.1507				3.2666			5.03584	4.41689	4.72636	0.437662
0.630417		30.5879	34.0471				3.26047			5.03759	4.41817	4.72788	0.437997
0.630833		30.9825	34.1234				3.22971			5.0406	4.41488	4.72774	0.442451
0.63125		31.0869	34.225				3.26487			5.04189	4.4166	4.72924	0.442152
0.631667		31.145	34.2435				3.27242			5.04354	4.41622	4.72988	0.443579
0.632083		31.0454	34.2631				3.25905			5.04594	4.41633	4.73114	0.445204
0.6325		31.0881	34.2574				3.24619			5.04708	4.41901	4.73304	0.444114
0.632917		31.0588	34.2659				3.25333			5.04741	4.41981	4.73361	0.443783
0.633333		31.0477	34.274				3.25287			5.0401	4.42192	4.73101	0.437114
0.63375		31.1045	34.3067				3.25266			5.0436	4.42333	4.73346	0.438594
0.634167		31.1121	34.3704				3.27856			5.04491	4.42219	4.73355	0.440333
0.634583		31.1183	34.3442				3.31091			5.04593	4.42263	4.73428	0.440745
0.635		31.0624	34.3268				3.32125			5.04953	4.42539	4.73746	0.441332
0.635417		31.1676	34.3762				3.31858			5.04922	4.42884	4.73903	0.438677
0.635833		31.075	34.3752				3.36254			5.05332	4.42907	4.74119	0.441408
0.63625		31.1112	34.4158				3.3512			5.05063	4.42984	4.74024	0.438963
0.636667		31.0961	34.7056				3.34947			5.05029	4.42932	4.73981	0.439092
0.637083		31.1192	34.6774				3.33745			5.0556	4.42865	4.74213	0.443324
0.6375		31.155	34.6642				3.3682			5.05796	4.42809	4.74302	0.445386
0.637917		31.0898	34.5947				3.39124			5.05741	4.4305	4.74396	0.443297
0.638333		31.0591	34.6884				3.34137			5.05547	4.43119	4.74333	0.441427
0.63875		31.1365	34.693				3.27567			5.05287	4.43347	4.74317	0.437984
0.639167		31.1373	34.6658				3.35432			5.05822	4.43253	4.74537	0.442432
0.639583		31.1499	34.7234				3.3656			5.05658	4.43286	4.74472	0.441036
0.64		31.1389	34.7255				3.3508			5.05952	4.43708	4.7483	0.440128
0.640417		31.0929	34.7792				3.33912			5.0664	4.43791	4.75215	0.444406
0.640833		31.1437	34.7949				3.31119			5.0677	4.43802	4.75286	0.445245
0.64125		31.1715	34.8098				3.35454			5.06609	4.43922	4.75265	0.443264
0.641667		31.1646	34.7808				3.38615			5.06614	4.44202	4.75408	0.441325
0.642083		31.1081	34.7303				3.35006			5.06827	4.44273	4.7555	0.442325
0.6425		31.1898	34.7872				3.35578			5.06856	4.44165	4.7551	0.443294
0.642917		31.1042	34.7595				3.3727			5.07845	4.44256	4.7605	0.449646
0.643333		31.2122	34.8146				3.36928			5.08578	4.44185	4.76382	0.45533
0.64375		31.2103	34.7884				3.38533			5.08335	4.44221	4.76278	0.453355
0.644167		30.7115	34.8748				3.37365			5.08098	4.4419	4.76144	0.4519
0.644583		31.0544	34.8559				3.38817			5.08552	4.44398	4.76475	0.453642
0.645		31.0769	34.8286				3.37359			5.09037	4.44403	4.7672	0.457034
0.645417		31.1559	33.3587				3.36985			5.0897	4.44497	4.76733	0.455891
0.645833		30.6071	35.0822				3.34461			5.09102	4.44292	4.76697	0.458277
0.64625		30.5965	34.9324				3.34692			5.09439	4.44641	4.7704	0.45819
0.646667		31.0085	34.964				3.37761			5.09542	4.44473	4.77007	0.460109
0.647083		31.0884	35.0149				3.34389			5.09852	4.44773	4.77312	0.460176
0.6475		31.1714	34.8746				3.40909			5.1038	4.45014	4.77697	0.462207
0.647917		31.1451	34.8879				3.39591			5.10422	4.44819	4.7762	0.46388
0.648333		31.1107	34.9595				3.40683			5.10818	4.44938	4.77878	0.465843
0.64875		31.1302	35.0051				3.4297			5.10819	4.44985	4.77902	0.465514
0.649167		31.0622	34.977				3.40323			5.1104	4.45231	4.78135	0.465334
0.649583		31.1008	35.0393				3.42392			5.11673	4.45333	4.78503	0.469095
0.65		31.1425	35.0336				3.38403			5.12085	4.45393	4.78739	0.471585
0.650417		31.137	35.0279				3.37589			5.12225	4.45672	4.78948	0.470605
0.650833		31.1826	35.0506				3.37521			5.12523	4.45852	4.79188	0.471436
0.65125		31.2055	35.0057				3.38209			5.12666	4.45977	4.79322	0.471563
0.651667		31.1817	35.0523				3.36029			5.12171	4.46052	4.79112	0.467532
0.652083		31.1581	35.0192				3.36005			5.12456	4.46042	4.79249	0.469622
0.6525		31.1993	35.0091				3.32534			5.12208	4.46346	4.79277	0.465715
0.652917		31.2162	35.1206				3.30631			5.12617	4.46452	4.79535	0.467856
0.653333		31.1767	35.104				3.29074			5.12721	4.46482	4.79602	0.468381
0.65375		31.1209	35.0635				3.29318			5.13027	4.46654	4.79841	0.469333
0.654167		31.151	35.1853				3.29246			5.1311	4.46895	4.80003	0.468206
0.654583		31.2159	35.1145				3.30979			5.13395	4.46933	4.80164	0.469952
0.655		31.1303	35.1735				3.27707			5.13169	4.46818	4.79994	0.469173
0.655417		31.1799	35.1763				3.29278			5.12988	4.47029	4.80009	0.4664
0.655833		31.2184	35.1745				3.31546			5.13541	4.47441	4.80491	0.467399
0.65625		31.1034	35.2233				3.3275			5.13691	4.47781	4.80736	0.466053
0.656667		31.1147	35.1857				3.33865			5.13395	4.47529	4.80462	0.465739
0.657083		31.1485	35.2218				3.29331			5.13869	4.47516	4.80693	0.46919
0.6575		31.1275	35.2321				3.25099			5.14518	4.47606	4.81062	0.473143
0.657917		31.1979	35.3201				3.25797			5.14248	4.47941	4.81094	0.468863
0.658333		30.5497	35.324				3.25519			5.14205	4.47898	4.81052	0.468858
0.65875		30.9807	35.3638				3.25875			5.14325	4.47951	4.81138	0.469337
0.659167		31.0627	35.397				3.21272			5.14569	4.48117	4.81343	0.469886
0.659583		31.1356	35.3826				3.22548			5.14256	4.48415	4.81335	0.465563
0.66		31.1738	35.2784				3.25714			5.14663	4.48335	4.81499	0.469013
0.660417		31.1775	35.2814				3.24245			5.14284	4.48546	4.81415	0.464834
0.660833		31.212	35.3128				3.19174			5.14132	4.48419	4.81275	0.46466
0.66125		31.2172	35.3337				3.22919			5.14538	4.48899	4.81719	0.464141
0.661667		31.204	35.4121				3.2708			5.14506	4.48728	4.81617	0.46512
0.662083		31.2486	35.3943				3.29715			5.15005	4.48821	4.81913	0.467991
0.6625		31.2006	35.4083				3.25159			5.14789	4.48569	4.81679	0.468249
0.662917		31.2077	35.4741				3.2357			5.14446	4.48753	4.81599	0.464518
0.663333		31.1378	35.4906				3.2278			5.14687	4.48928	4.81808	0.464988
0.66375		31.1058	35.4974				3.2514			5.14755	4.48936	4.81846	0.465415
0.664167		31.0592	35.5498				3.228			5.14803	4.48985	4.81894	0.465403
0.664583		31.1194	35.5218				3.26544			5.15001	4.48798	4.81899	0.468128
0.665		31.1791	35.5024				3.19755			5.15065	4.49233	4.82149	0.465499
0.665417		31.2199	35.439				3.23399			5.14995	4.49326	4.8216	0.464346
0.665833		31.1687	35.3865				3.19202			5.15992	4.493	4.82646	0.471583
0.66625		31.1829	35.4409				3.18479			5.16336	4.49264	4.828	0.474268
0.666667		31.2027	35.498				3.19356			5.16826	4.49406	4.83116	0.47673
0.667083		31.2992	35.444				3.188			5.16706	4.49546	4.83126	0.474897
0.6675		31.2683	35.4312				3.19301			5.16355	4.49676	4.83015	0.47149
0.667917		31.2469	35.5091				3.16819			5.15899	4.49864	4.82882	0.466939
0.668333		31.213	35.5961				3.20207			5.15053	4.49719	4.82386	0.461981
0.66875		31.2313	35.5558				3.16612			5.15644	4.49712	4.82678	0.466209
0.669167		31.185	35.5448				3.15613			5.15965	4.50027	4.82996	0.46625
0.669583		31.2282	35.534				3.14933			5.16248	4.50296	4.83272	0.466353
0.67		31.3196	35.5917				3.16779			5.16636	4.50418	4.83527	0.468231
0.670417		31.2896	35.5257				3.16647			5.16163	4.50602	4.83382	0.463583
0.670833		31.2758	35.5073				3.18903			5.16552	4.50586	4.83569	0.466447
0.67125		31.2968	35.5389				3.16596			5.16284	4.50639	4.83461	0.46418
0.671667		31.2085	35.5456				3.15916			5.16297	4.50487	4.83392	0.465344
0.672083		31.2466	35.5194				3.12578			5.16752	4.50807	4.83779	0.466301
0.6725		31.252	35.5611				3.17263			5.16962	4.50802	4.83882	0.467823
0.672917		31.2602	35.5339				3.15789			5.17779	4.50697	4.84238	0.474343
0.673333		31.2578	35.5282				3.14225			5.17875	4.5085	4.84362	0.473937
0.67375		31.2368	35.6054				3.17859			5.17864	4.5107	4.84467	0.472306
0.674167		31.2377	35.5769				3.15862			5.17294	4.51482	4.84388	0.465355
0.674583		31.2677	35.6225				3.17889			5.1683	4.51625	4.84227	0.461071
0.675		31.3556	35.6402				3.15425			5.16822	4.5146	4.84141	0.462178
0.675417		31.3353	35.6096				3.18015			5.17927	4.51463	4.84695	0.46997
0.675833		31.2786	35.6541				3.22695			5.1875	4.51207	4.84979	0.477601
0.67625		31.2588	35.671				3.20201			5.17905	4.5144	4.84673	0.469977
0.676667		31.262	35.6665				3.20713			5.17738	4.5119	4.84464	0.470567
0.677083		31.2366	35.6389				3.19238			5.17335	4.51196	4.84266	0.467675
0.6775		31.2161	35.6308				3.21009			5.17421	4.45713	4.81567	0.507055
0.677917		31.2546	35.6062				3.16825			5.1802	4.70303	4.94162	0.337412
0.678333		31.2844	35.6917				3.17508			5.17275	4.65248	4.91262	0.367881
0.67875		31.2822	35.7534				3.19318			5.17773	4.69712	4.93743	0.339842
0.679167		31.1863	35.6947				3.21796			5.18187	4.64599	4.91393	0.378921
0.679583		31.2247	35.7796				3.17112			5.18614	4.66918	4.92766	0.365546
0.68		31.143	35.7404				3.20857			5.18932	4.75489	4.97211	0.307185
0.680417		31.2359	35.8143				3.17895			5.18953	4.69454	4.94204	0.35001
0.680833		31.2368	35.8311				3.2034			5.19406	4.74656	4.97031	0.316433
0.68125		31.1965	35.8673				3.19353			5.19292	4.68876	4.94084	0.356495
0.681667		31.2443	35.879				3.1957			5.19143	4.76922	4.98033	0.298548
0.682083		31.1864	35.8697				3.20415			5.19378	4.74027	4.96703	0.32068
0.6825		31.1168	35.9194				3.19536			5.18726	4.68471	4.93599	0.355352
0.682917		31.183	35.9666				3.24216			5.19492	4.77585	4.98539	0.296322
0.683333		31.2138	35.9406				3.22473			5.18959	4.69874	4.94416	0.347087
0.68375		31.3038	35.9526				3.20315			5.19126	4.71083	4.95105	0.339714
0.684167		31.2925	35.9431				3.21557			5.19578	4.69073	4.94326	0.357128
0.684583		31.2841	35.9134				3.20154			5.19928	4.61235	4.90581	0.415023
0.685		31.1987	35.9456				3.22067			5.19805	4.73459	4.96632	0.327711
0.685417		31.1413	35.9864				3.22474			5.19631	4.63994	4.91812	0.393407
0.685833		31.2123	36.0247				3.21896			5.19438	4.74324	4.96881	0.319001
0.68625		31.1527	36.0428				3.25643			5.19106	4.62237	4.90671	0.402123
0.686667		30.8313	36.0043				3.2759			5.18908	4.66257	4.92583	0.372302
0.687083		31.0311	36.0223				3.26992			5.18657	4.60618	4.89638	0.410398
0.6875		31.1805	35.9903				3.26352			5.19174	4.66039	4.92607	0.375726
0.687917		31.1959	35.9818				3.22663			5.18692	4.64606	4.91649	0.382446
0.688333		30.9264	35.9853				3.22082			5.18389	4.63936	4.91163	0.385039
0.68875		31.0887	35.9807				3.21956			5.19185	4.56365	4.87775	0.444198
0.689167		31.1673	36.0055				3.2009			5.18835	4.68238	4.93537	0.357779
0.689583		31.1027	36.1046				3.2715			5.1919	4.56915	4.88052	0.440357
0.69		31.1555	36.0941				3.3038			5.18722	4.68158	4.9344	0.357539
0.690417		31.0155	36.1081				3.29103			5.1822	4.62437	4.90328	0.394446
0.690833		31.1571	36.0542				3.25142			5.1868	4.57466	4.88073	0.432847
0.69125		31.2148	36.0445				3.29668			5.18977	4.62699	4.90838	0.397941
0.691667		31.1718	36.1247				3.32208			5.18863	4.66046	4.92455	0.373473
0.692083		31.128	36.1282				3.35584			5.18871	4.72325	4.95598	0.329134
0.6925		31.12	36.2172				3.29553			5.18763	4.61658	4.9021	0.403797
0.692917		31.2067	36.1776				3.34028			5.19136	4.62572	4.90854	0.39997
0.693333		31.2315	36.1641				3.35928			5.18924	4.64831	4.91877	0.382491
0.69375		31.1766	36.1684				3.35659			5.19172	4.60847	4.9001	0.412424
0.694167		31.1683	36.2147				3.32667			5.19625	4.66385	4.93005	0.376462
0.694583		31.1102	36.1323				3.34071			5.19498	4.64617	4.92058	0.388069
0.695		31.2109	36.1482				3.29284			5.187	4.60587	4.89644	0.410918
0.695417		31.2522	36.1404				3.2819			5.19444	4.66242	4.92843	0.376197
0.695833		31.2005	36.1764				3.25963			5.18922	4.63019	4.9097	0.395293
0.69625		31.1472	36.2071				3.29097			5.19325	4.71973	4.95649	0.334825
0.696667		31.1592	36.2102				3.30734			5.19178	4.65611	4.92394	0.378778
0.697083		31.1326	36.1743				3.28855			5.18704	4.61091	4.89898	0.407391
0.6975		31.066	36.1728				3.31195			5.1843	4.73069	4.95749	0.320746
0.697917		31.2575	36.1583				3.29572			5.18894	4.6462	4.91757	0.383781
0.698333		31.145	36.2005				3.28776			5.18847	4.64608	4.91728	0.383527
0.69875		31.0842	36.1603				3.25531			5.18569	4.67235	4.92902	0.362984
0.699167		31.1033	36.2199				3.32459			5.18862	4.64398	4.9163	0.38512
0.699583		31.1389	36.2232				3.30283			5.19325	4.70406	4.94865	0.345912
0.7		31.2305	36.2309				3.33474			5.19165	4.59968	4.89567	0.41859
0.700417		31.2444	36.2743				3.29865			5.1933	4.61992	4.90661	0.405439
0.700833		31.1816	36.2677				3.34125			5.18794	4.60474	4.89634	0.412386
0.70125		31.1835	36.2368				3.30937			5.18573	4.64017	4.91295	0.385771
0.701667		31.1481	36.2122				3.30798			5.18477	4.68485	4.93481	0.353497
0.702083		31.1566	36.2799				3.32876			5.18766	4.64529	4.91647	0.383516
0.7025		31.2356	36.2736				3.26708			5.18803	4.62567	4.90685	0.397645
0.702917		31.1684	36.2912				3.29996			5.19103	4.69341	4.94222	0.351872
0.703333		31.23	36.3233				3.30351			5.18277	4.72577	4.95427	0.323147
0.70375		31.195	36.2855				3.27382			5.18383	4.65774	4.92078	0.372001
0.704167		31.195	36.2994				3.3159			5.18412	4.64938	4.91675	0.378116
0.704583		31.2141	36.2537				3.33914			5.18447	4.63979	4.91213	0.385149
0.705		31.2345	36.2875				3.29695			5.1866	4.63139	4.909	0.392592
0.705417		31.1937	36.3254				3.27792			5.1909	4.69271	4.9418	0.35227
0.705833		31.1879	36.2779				3.28341			5.19503	4.66212	4.92858	0.376825
0.70625		31.222	36.2396				3.30975			5.18928	4.63861	4.91395	0.389381
0.706667		31.2297	36.3541				3.30892			5.19032	4.59908	4.8947	0.418073
0.707083		31.2037	36.4238				3.26017			5.18772	4.56251	4.87511	0.44209
0.7075		31.1824	36.4168				3.28553			5.18339	4.63933	4.91136	0.384704
0.707917		31.1335	36.3936				3.29019			5.17946	4.67653	4.928	0.355623
0.708333		31.1193	36.3851				3.24547			5.1796	4.59637	4.88798	0.412406
0.70875		31.1779	36.4018				3.26029			5.18165	4.75694	4.9693	0.300319
0.709167		31.1918	36.422				3.26508			5.18698	4.67877	4.93287	0.359356
0.709583		31.2282	36.4381				3.19644			5.18803	4.66707	4.92755	0.368373
0.71		31.1596	36.4263				3.25126			5.18731	4.68855	4.93793	0.352676
0.710417		31.245	36.4061				3.25114			5.18706	4.70996	4.94851	0.337361
0.710833		31.2885	36.4076				3.21055			5.18922	4.61101	4.90011	0.408853
0.71125		31.1834	36.4085				3.25726			5.18326	4.70529	4.94428	0.337977
0.711667		31.2287	36.5519				3.25252			5.18122	4.6859	4.93356	0.350243
0.712083		30.5387	36.5522				3.28704			5.17514	4.776	4.97557	0.282232
0.7125		31.0088	36.4719				3.26613			5.17471	4.70054	4.93762	0.335287
0.712917		31.0393	36.5316				3.24744			5.18104	4.64787	4.91446	0.377006
0.713333		31.1125	36.5917				3.24764			5.189	4.81819	5.00359	0.262199
0.71375		31.2112	36.6304				3.19764			5.18971	4.66388	4.9268	0.371822
0.714167		31.1785	36.7326				3.1802			5.1866	4.82263	5.00461	0.257367
0.714583		31.1514	36.6937				3.14085			5.18447	4.76347	4.97397	0.297694
0.715		31.0645	36.7429				3.20129			5.19805	4.7255	4.96178	0.334145
0.715417		31.0645	36.6926				3.21027			5.20272	4.78498	4.99385	0.295388
0.715833		31.0892	36.677				3.21599			5.20096	4.82117	5.01107	0.268547
0.71625		31.1703	36.6736				3.21354			5.20086	4.6922	4.94653	0.359673
0.716667		31.1094	36.6549				3.21082			5.20144	4.76145	4.98145	0.311121
0.717083		31.1364	36.7146				3.24672			5.20399	4.79137	4.99768	0.291771
0.7175		31.239	36.6761				3.22731			5.20052	4.74652	4.97352	0.321027
0.717917		31.195	36.7104				3.20286			5.20068	4.80168	5.00118	0.28214
0.718333		31.2664	36.7007				3.17409			5.19917	4.74255	4.97086	0.322875
0.71875		31.1787	36.7699				3.15282			5.1998	4.84961	5.0247	0.247622
0.719167		30.7255	36.7445				3.17403			5.198	4.7714	4.9847	0.301646
0.719583		30.8867	36.6995				3.16799			5.20508	4.80838	5.00673	0.280505
0.72		31.0088	36.6745				3.16239			5.2069	4.86792	5.03741	0.239692
0.720417		31.1564	36.7371				3.12002			5.20593	4.79099	4.99846	0.29341
0.720833		31.1323	36.7504				3.12703			5.20574	4.79315	4.99945	0.291746
0.72125		31.1203	36.733				3.14842			5.2041	4.90674	5.05542	0.21027
0.721667		31.1029	36.8038				3.15684			5.2045	4.86377	5.03413	0.240933
0.722083		31.1431	36.7951				3.14128			5.20476	4.83356	5.01916	0.262479
0.7225		31.1767	36.8287				3.10502			5.1987	4.83058	5.01464	0.260299
0.722917		31.1228	36.8465				3.08153			5.19938	4.82542	5.0124	0.264433
0.723333		31.1089	36.838				3.12064			5.20379	4.88346	5.04362	0.22651
0.72375		31.0849	36.8713				3.04648			5.20594	4.78455	4.99524	0.297965
0.724167		31.0779	36.9505				3.06569			5.21281	4.86446	5.03864	0.246324
0.724583		31.0873	36.91				3.12325			5.21502	4.9164	5.06571	0.211155
0.725		31.123	36.9211				3.04828			5.21332	4.84246	5.02789	0.262234
0.725417		31.1041	36.9669				3.11859			5.21796	4.84632	5.03214	0.262793
0.725833		31.1267	36.9472				3.07985			5.22472	4.86749	5.0461	0.252606
0.72625		31.1788	36.9423				3.02663			5.22432	4.8836	5.05396	0.240924
0.726667		31.2247	36.961				3.03223			5.22372	4.91542	5.06957	0.218002
0.727083		31.1608	36.9593				3.05651			5.21936	4.77597	4.99766	0.313525
0.7275		31.135	36.9439				3.10365			5.2235	4.8846	5.05405	0.23964
0.727917		31.205	36.969				3.05115			5.22122	4.86648	5.04385	0.250841
0.728333		31.1572	36.94				3.05874			5.22834	4.8082	5.01827	0.297084
0.72875		31.2296	36.9701				3.11115			5.23128	4.86539	5.04833	0.258722
0.729167		31.2406	36.9374				3.10804			5.23379	4.9063	5.07005	0.231571
0.729583		31.1867	36.9411				3.10953			5.23379	4.9325	5.08314	0.213043
0.73		31.2333	37.0181				3.06389			5.23401	4.85352	5.04376	0.26905
0.730417		31.2061	36.9749				3.06781			5.23556	4.93221	5.08388	0.214506
0.730833		31.1882	37.0077				3.04689			5.23175	4.86571	5.04873	0.258825
0.73125		31.1975	36.9838				3.03277			5.23692	4.81443	5.02567	0.298743
0.731667		31.1526	37.0728				3.06964			5.23463	4.93362	5.08412	0.21285
0.732083		31.207	37.0743				3.10603			5.23704	4.84026	5.03865	0.280569
0.7325		31.1915	37.0842				3.10853			5.24643	4.87327	5.05985	0.263868
0.732917		31.2345	37.0906				3.09477			5.245	4.8417	5.04335	0.285173
0.733333		31.2096	37.109				3.09033			5.24865	4.87073	5.05969	0.267232
0.73375		31.2796	37.093				3.11117			5.24838	4.84726	5.04782	0.283629
0.734167		31.3136	37.0996				3.09567			5.25299	4.82571	5.03935	0.30213
0.734583		31.2752	37.1045				3.06441			5.25777	4.8874	5.07259	0.261892
0.735		31.2567	37.0853				3.07865			5.26252	4.81555	5.03903	0.316057
0.735417		30.6779	37.1364				3.07428			5.26675	4.85756	5.06215	0.289337
0.735833		31.0375	37.1007				3.09232			5.26874	4.82657	5.04766	0.312662
0.73625		31.1528	37.1228				3.04864			5.26625	4.90627	5.08626	0.25454
0.736667		31.25	37.1233				3.08511			5.27118	4.81147	5.04132	0.325067
0.737083		31.3132	37.1341				3.11453			5.27638	4.90111	5.08874	0.265352
0.7375		31.3164	37.1604				3.08854			5.27866	4.93456	5.10661	0.24332
0.737917		31.2476	37.1886				3.1018			5.27663	4.88608	5.08136	0.276166
0.738333		31.2842	37.2173				3.11685			5.27246	4.8259	5.04918	0.315768
0.73875		31.3577	37.2354				3.12063			5.27436	4.90555	5.08996	0.260789
0.739167		31.302	37.2161				3.13489			5.27915	4.92026	5.0997	0.253771
0.739583		31.3169	37.2312				3.08767			5.28111	4.80523	5.04317	0.336495
0.74		31.3442	37.258				3.05898			5.28746	4.8494	5.06843	0.309758
0.740417		31.3328	37.2103				3.0702			5.28645	4.8875	5.08697	0.2821
0.740833		31.3147	37.2086				3.14596			5.28843	4.85105	5.06974	0.309277
0.74125		31.2993	37.212				3.13405			5.29399	4.77063	5.03231	0.370075
0.741667		31.3382	37.1938				3.10477			5.29269	4.82043	5.05656	0.333939
0.742083		31.2949	37.2597				3.16241			5.29356	4.78045	5.037	0.362821
0.7425		31.379	37.2935				3.07816			5.29094	4.81077	5.05085	0.339532
0.742917		31.3274	37.249				3.09209			5.29108	4.73404	5.01256	0.393887
0.743333		31.3812	37.2908				3.12782			5.29796	4.83271	5.06534	0.328982
0.74375		31.3982	37.2613				3.1075			5.29289	4.75045	5.02167	0.383562
0.744167		31.3423	37.3323				3.15056			5.29696	4.77896	5.03796	0.366279
0.744583		31.3026	37.341				3.10454			5.29699	4.80374	5.05036	0.348783
0.745		31.3363	37.331				3.13128			5.29649	4.75085	5.02367	0.385824
0.745417		31.3038	37.3742				3.14828			5.29262	4.78958	5.0411	0.355704
0.745833		31.3728	37.388				3.1228			5.29615	4.78992	5.04303	0.357962
0.74625		31.4394	37.385				3.10481			5.29202	4.85777	5.0749	0.307063
0.746667		31.3823	37.4497				3.09662			5.29123	4.79503	5.04313	0.350864
0.747083		31.3425	37.4496				3.09864			5.29895	4.73577	5.01736	0.39823
0.7475		31.2947	37.4306				3.13369			5.30213	4.79573	5.04893	0.358078
0.747917		31.3742	37.4802				3.11029			5.30299	4.80707	5.05503	0.350668
0.748333		31.3182	37.4554				3.14448			5.29994	4.76825	5.03409	0.375958
0.74875		31.3638	37.4367				3.12313			5.30164	4.82608	5.06386	0.336271
0.749167		31.3577	37.4825				3.12753			5.29421	4.80085	5.04753	0.348858
0.749583		31.3564	37.4591				3.15209			5.2975	4.74554	5.02152	0.390289
0.75		31.275	37.4477				3.18906			5.29645	4.71043	5.00344	0.414383
0.750417		31.1411	37.4275				3.20198			5.29204	4.78732	5.03968	0.356892
0.750833		30.5638	37.4865				3.19741			5.29364	4.731	5.01232	0.397849
0.75125		30.588	37.4796				3.14626			5.29675	4.80345	5.0501	0.34881
0.751667		31.0588	37.5106				3.17029			5.30251	4.75521	5.02886	0.386997
0.752083		31.215	37.5115				3.14626			5.30058	4.72466	5.01262	0.407242
0.7525		31.2838	37.5253				3.13851			5.29838	4.7394	5.01889	0.395261
0.752917		31.2652	37.5559				3.12921			5.2938	4.75349	5.02364	0.382059
0.753333		31.3028	37.5989				3.10885			5.29858	4.72872	5.01365	0.402952
0.75375		31.3159	37.5593				3.11713			5.29907	4.71359	5.00633	0.414003
0.754167		31.3193	37.5766				3.13331			5.30436	4.71106	5.00771	0.419531
0.754583		31.364	37.5883				3.18567			5.30398	4.73111	5.01755	0.405084
0.755		31.2994	37.6333				3.15199			5.30427	4.79136	5.04781	0.362683
0.755417		31.2829	37.6588				3.11348			5.30605	4.74224	5.02414	0.398675
0.755833		31.2953	37.6488				3.19833			5.31372	4.67403	4.99387	0.452324
0.75625		31.3387	37.6717				3.16508			5.3114	4.65666	4.98403	0.462971
0.756667		31.3403	37.5821				3.16029			5.31104	4.69853	5.00479	0.433108
0.757083		31.3378	37.5919				3.13718			5.30996	4.71634	5.01315	0.419756
0.7575		31.3727	37.5825				3.16381			5.30957	4.75857	5.03407	0.38962
0.757917		31.3668	37.5619				3.19052			5.30813	4.72775	5.01794	0.410395
0.758333		31.3208	37.5766				3.18726			5.30562	4.70917	5.00739	0.421753
0.75875		31.3765	37.5914				3.12937			5.30884	4.68981	4.99932	0.43772
0.759167		31.409	37.6202				3.20819			5.30989	4.78772	5.0488	0.369226
0.759583		31.4199	37.6049				3.14635			5.30542	4.71039	5.00791	0.420748
0.76		31.3263	37.5774				3.1704			5.31341	4.68572	4.99957	0.443846
0.760417		31.4062	37.588				3.12261			5.30944	4.70977	5.0096	0.424034
0.760833		31.3783	37.5773				3.16671			5.30964	4.68273	4.99618	0.443293
0.76125		31.3621	37.5339				3.15761			5.30539	4.77339	5.03939	0.376184
0.761667		31.378	37.6194				3.09605			5.3052	4.67647	4.99083	0.444579
0.762083		31.4452	37.6278				3.16575			5.30517	4.77215	5.03866	0.376908
0.7625		31.3482	37.6194				3.12392			5.31009	4.70774	5.00891	0.425921
0.762917		31.4345	37.5671				3.12678			5.30841	4.79738	5.0529	0.361356
0.763333		31.2971	37.5822				3.15892			5.30868	4.74543	5.02705	0.398281
0.76375		31.3826	37.593				3.14231			5.30796	4.6671	4.98753	0.453152
0.764167		31.4377	37.681				3.23459			5.31257	4.76694	5.03975	0.385818
0.764583		31.0764	37.6099				3.20003			5.30758	4.68558	4.99658	0.43982
0.765		31.3143	37.5974				3.20393			5.30729	4.70882	5.00805	0.423185
0.765417		31.402	37.5892				3.15784			5.30716	4.69118	4.99917	0.435565
0.765833		31.4003	37.6105				3.20911			5.31307	4.74026	5.02666	0.405038
0.76625		31.3774	37.6052				3.1666			5.31087	4.72991	5.02039	0.4108
0.766667		31.4039	37.6238				3.18903			5.31327	4.68801	5.00064	0.442129
0.767083		31.4227	37.708				3.2022			5.31416	4.71807	5.01611	0.421495
0.7675		31.4945	37.6957				3.19544			5.31561	4.7102	5.0129	0.42809
0.767917		31.457	37.7357				3.1686			5.31768	4.7558	5.03674	0.397303
0.768333		31.459	37.7158				3.20937			5.31086	4.78055	5.0457	0.37499
0.76875		31.4142	37.7721				3.18543			5.31201	4.67525	4.99363	0.450255
0.769167		31.4126	37.8071				3.16766			5.31	4.71265	5.01133	0.422393
0.769583		31.4633	37.789				3.18922			5.30768	4.7864	5.04704	0.368602
0.77		31.4846	37.7858				3.18146			5.31274	4.76254	5.03764	0.389054
0.770417		31.4514	37.818				3.1788			5.31281	4.80239	5.0576	0.36092
0.770833		31.4214	37.7673				3.18193			5.31308	4.74414	5.02861	0.402298
0.77125		31.4178	37.7811				3.15434			5.3126	4.82566	5.06913	0.34432
0.771667		31.4659	37.7754				3.18043			5.31119	4.7835	5.04734	0.373138
0.772083		31.381	37.7498				3.18176			5.31008	4.80948	5.05978	0.35398
0.7725		31.2978	37.7778				3.1217			5.31313	4.70598	5.00955	0.429321
0.772917		31.3795	37.7626				3.14784			5.3177	4.79854	5.05812	0.367103
0.773333		31.4058	37.7768				3.13304			5.33696	4.80816	5.07256	0.373922
0.77375		31.4374	37.7338				3.12547			5.34431	4.78375	5.06403	0.396375
0.774167		31.4154	37.7434				3.12468			5.34445	4.83506	5.08975	0.360193
0.774583		31.3677	37.7644				3.11736			5.33948	4.88089	5.11018	0.324271
0.775		31.3927	37.7679				3.12714			5.34212	4.81994	5.08103	0.369235
0.775417		31.4481	37.7786				3.16324			5.34449	4.81465	5.07957	0.374658
0.775833		31.4144	37.865				3.17635			5.34862	4.86229	5.10546	0.343888
0.77625		31.4578	37.9113				3.1286			5.34573	4.84195	5.09384	0.356225
0.776667		31.3597	37.9151				3.11086			5.34329	4.85736	5.10033	0.343603
0.777083		31.33	38.0005				3.10437			5.34623	4.84718	5.0967	0.352886
0.7775		31.3869	37.9439				3.15548			5.34429	4.95373	5.14901	0.27617
0.777917		31.3959	37.9501				3.15276			5.34386	4.90045	5.12216	0.313537
0.778333		31.4505	38.0165				3.11849			5.33952	4.87659	5.10805	0.327341
0.77875		31.4509	37.9979				3.08104			5.34058	4.94612	5.14335	0.278925
0.779167		31.4032	38.0148				3.12584			5.34129	4.9127	5.12699	0.303064
0.779583		31.4674	38.0502				3.12653			5.34306	4.86842	5.10574	0.335621
0.78		31.4016	38.045				3.13356			5.34566	4.9199	5.13278	0.301053
0.780417		31.4436	38.0604				3.14723			5.34542	4.91894	5.13218	0.301566
0.780833		31.5012	38.0687				3.11714			5.34337	4.81609	5.07973	0.372844
0.78125		31.4682	38.106				3.10046			5.34017	4.954	5.14708	0.273065
0.781667		31.5172	38.1362				3.08152			5.34334	4.91644	5.12989	0.301863
0.782083		31.42	38.1324				3.07736			5.3466	4.87298	5.10979	0.334898
0.7825		31.4454	38.1315				3.10154			5.34745	4.93458	5.14101	0.291946
0.782917		31.3729	38.1156				3.02539			5.34901	4.91648	5.13275	0.305847
0.783333		31.3824	38.1075				3.04537			5.35662	4.90769	5.13215	0.317445
0.78375		31.3665	38.1705				3.01794			5.35276	4.94086	5.14681	0.291256
0.784167		31.4233	38.1666				3.03849			5.35461	5.03376	5.19419	0.226869
0.784583		31.3946	38.1194				3.03476			5.35337	4.92793	5.14065	0.300826
0.785		31.4345	38.1401				3.04045			5.35263	4.96137	5.157	0.276668
0.785417		31.4116	38.1453				3.00883			5.34997	5.02999	5.18998	0.226262
0.785833		31.4683	38.1545				3.0311			5.34986	4.93545	5.14266	0.293034
0.78625		31.4151	38.2021				3.00988			5.34621	4.92389	5.13505	0.298626
0.786667		30.6041	38.1548				3.03058			5.34408	4.94476	5.14442	0.282364
0.787083		31.2195	38.1798				3.02584			5.34128	4.88473	5.11301	0.322835
0.7875		31.3292	38.21				3.00313			5.3374	4.9709	5.15415	0.259154
0.787917		31.364	38.3046				2.96823			5.34147	4.88898	5.11522	0.319965
0.788333		31.3889	38.3358				2.98774			5.34743	4.96547	5.15645	0.270089
0.78875		31.4085	38.3583				2.94676			5.34287	4.94717	5.14502	0.279803
0.789167		31.4494	38.2756				2.99539			5.34664	4.93773	5.14218	0.289149
0.789583		31.4205	38.2639				2.99656			5.34609	5.00488	5.17548	0.241274
0.79		31.3865	38.2843				2.99486			5.35699	5.02132	5.18915	0.237357
0.790417		31.41	38.222				3.00114			5.35218	4.96646	5.15932	0.272745
0.790833		31.4837	38.1788				2.99059			5.35745	4.90852	5.13299	0.317442
0.79125		31.461	38.2449				2.96523			5.35644	4.99426	5.17535	0.256104
0.791667		31.535	38.2973				3.01957			5.35447	4.88125	5.11786	0.334621
0.792083		31.5437	38.2635				3.00638			5.355	4.94614	5.15057	0.289103
0.7925		31.4545	38.2822				3.06534			5.35146	4.95501	5.15324	0.280334
0.792917		31.4638	38.2957				3.03598			5.3507	4.97778	5.16424	0.263693
0.793333		31.49	38.2707				2.9952			5.35207	4.95154	5.1518	0.283221
0.79375		31.4676	38.2978				3.00711			5.35597	5.0405	5.19824	0.223066
0.794167		31.4673	38.2355				2.99327			5.35319	4.94782	5.1505	0.286637
0.794583		31.5581	38.238				3.02652			5.34826	5.0342	5.19123	0.222075
0.795		29.9601	38.2162				3.00968			5.34243	5.01336	5.17789	0.232682
0.795417		29.4151	38.226				3.02739			5.34491	4.92658	5.13575	0.295805
0.795833		29.1828	38.1708				2.98221			5.34131	5.01438	5.17784	0.231172
0.79625		29.0224	38.1991				3.01513			5.34475	4.90523	5.12499	0.310785
0.796667		28.905	38.2218				3.0231			5.34743	5.02827	5.18785	0.225684
0.797083		28.8921	38.255				2.99744			5.35083	4.89974	5.12529	0.318969
0.7975		28.8208	38.2469				3.02892			5.35371	5.02276	5.18823	0.234018
0.797917		28.8229	38.2872				3.02401			5.35374	4.91555	5.13464	0.309842
0.798333		28.7471	38.2778				3.02173			5.35454	4.97871	5.16662	0.265751
0.79875		28.7515	38.2892				3.01424			5.34826	4.88649	5.11738	0.326519
0.799167		28.7882	38.3383				3.00594			5.34778	5.02145	5.18461	0.230754
0.799583		28.7349	38.3326				3.00259			5.35088	4.96544	5.15816	0.272548
0.8		28.6942	38.3147				3.02153			5.34967	4.89583	5.12275	0.320912
0.800417		28.6691	38.265				3.02291			5.35042	4.91194	5.13118	0.310047
0.800833		28.7291	38.2832				3.06542			5.34892	4.91801	5.13347	0.304704
0.80125		28.6741	38.2806				3.03948			5.35235	4.90618	5.12927	0.315495
0.801667		28.6507	38.2642				3.02989			5.35452	4.99546	5.17499	0.253897
0.802083		28.6442	38.2852				2.99825			5.35124	4.8735	5.11237	0.337813
0.8025		28.6443	38.2639				2.96421			5.34557	4.92003	5.1328	0.300904
0.802917		28.6775	38.3598				3.03871			5.34929	4.87157	5.11043	0.337797
0.803333		28.6579	38.3511				3.06497			5.34276	4.86569	5.10422	0.337344
0.80375		28.6485	38.3237				3.06734			5.34379	4.87065	5.10722	0.334556
0.804167		28.6602	38.3599				3.08752			5.34503	4.85138	5.0982	0.349063
0.804583		28.6514	38.3352				3.09186			5.34601	4.86927	5.10764	0.337102
0.805		28.653	38.3063				3.10842			5.3387	4.85352	5.09611	0.343075
0.805417		28.6503	38.3237				3.09677			5.3397	4.91187	5.12579	0.302519
0.805833		28.6123	38.3184				3.02324			5.34099	4.79618	5.06859	0.385235
0.80625		28.6502	38.355				3.06893			5.34455	4.86534	5.10494	0.338851
0.806667		28.6761	38.3427				3.05141			5.34142	4.84264	5.09203	0.352688
0.807083		28.6081	38.382				3.0312			5.34787	4.81687	5.08237	0.375479
0.8075		28.6553	38.4493				3.08248			5.35236	4.84028	5.09632	0.362093
0.807917		28.6868	38.4161				3.08778			5.35315	4.84188	5.09752	0.361523
0.808333		28.7204	38.4153				3.09212			5.35229	4.72849	5.04039	0.441097
0.80875		28.7237	38.4339				3.07914			5.35124	4.81742	5.08433	0.37747
0.809167		28.6913	38.4078				3.10823			5.35348	4.82643	5.08995	0.37268
0.809583		28.666	38.4987				3.06761			5.35481	4.8235	5.08916	0.375696
0.81		28.6034	38.5251				3.11125			5.35217	4.81409	5.08313	0.380477
0.810417		28.7124	38.575				3.11604			5.35172	4.83146	5.09159	0.367884
0.810833		28.6058	38.6046				3.0898			5.35136	4.76411	5.05773	0.415251
0.81125		28.6089	38.6168				3.04745			5.35152	4.81356	5.08254	0.380395
0.811667		28.6154	38.5859				3.03637			5.3506	4.78385	5.06723	0.400749
0.812083		28.5834	38.6015				3.02233			5.35149	4.85134	5.10141	0.353655
0.8125		28.5695	38.6104				3.01382			5.34939	4.85796	5.10367	0.347499
0.812917		28.5854	38.6499				3.03903			5.34827	4.81557	5.08192	0.376673
0.813333		28.5649	38.6188				3.11527			5.34771	4.88171	5.11471	0.329513
0.81375		28.5944	38.6215				3.12667			5.34537	4.80844	5.0769	0.37967
0.814167		28.6209	38.6899				3.1321			5.34254	4.80613	5.07433	0.379303
0.814583		28.612	38.6385				3.12078			5.33667	4.81449	5.07558	0.36924
0.815		28.5653	38.5765				3.09896			5.33296	4.89001	5.11149	0.313215
0.815417		28.5603	38.6344				3.11057			5.33398	4.83683	5.08541	0.351537
0.815833		28.5391	38.6436				3.15699			5.33037	4.79959	5.06498	0.375315
0.81625		28.5152	38.604				3.12914			5.33521	4.81789	5.07655	0.365806
0.816667		28.5535	38.6342				3.13848			5.34073	4.87053	5.10563	0.332482
0.817083		28.5516	38.6584				3.1462			5.3466	4.81564	5.08112	0.375452
0.8175		28.5504	38.6595				3.11454			5.34031	4.88173	5.11102	0.324259
0.817917		28.5765	38.6318				3.09675			5.34835	4.79883	5.07359	0.388571
0.818333		28.5405	38.6551				3.07225			5.34735	4.78583	5.06659	0.397054
0.81875		28.5021	38.6698				3.12472			5.34807	4.74425	5.04616	0.426966
0.819167		28.5034	38.7082				3.11754			5.34967	4.88692	5.1183	0.327211
0.819583		28.5445	38.6366				3.12195			5.34834	4.87229	5.11031	0.336613
0.82		28.5072	38.7441				3.13199			5.34508	4.82341	5.08425	0.368874
0.820417		28.4645	38.7679				3.15685			5.34833	4.75348	5.0509	0.420626
0.820833		28.4845	38.7786				3.11039			5.34777	4.78803	5.0679	0.3958
0.82125		28.4309	38.7578				3.12603			5.34748	4.83419	5.09083	0.36295
0.821667		28.484	38.7583				3.11346			5.35443	4.81337	5.0839	0.38258
0.822083		28.4614	38.7582				3.07899			5.35409	4.85177	5.10293	0.355196
0.8225		28.3845	38.6867				3.11159			5.35193	4.81627	5.0841	0.37877
0.822917		28.405	38.7723				3.09514			5.3527	4.77972	5.06621	0.405159
0.823333		28.4012	38.7446				3.1207			5.35003	4.80695	5.07849	0.384018
0.82375		28.4079	38.7449				3.09048			5.34732	4.86579	5.10656	0.340497
0.824167		28.4764	38.7843				3.11131			5.34481	4.80926	5.07704	0.37869
0.824583		28.4511	38.7701				3.08876			5.33818	4.89742	5.1178	0.311661
0.825		28.4216	38.7706				3.09454			5.34334	4.84269	5.09301	0.354011
0.825417		28.3941	38.7089				3.06273			5.33879	4.81377	5.07628	0.371243
0.825833		28.4292	38.7359				3.07341			5.34094	4.81981	5.08038	0.368495
0.82625		28.4413	38.7606				3.03149			5.33987	4.79005	5.06496	0.388777
0.826667		28.3992	38.7342				3.02512			5.34421	4.75482	5.04952	0.416766
0.827083		28.4374	38.7856				3.07561			5.34353	4.84225	5.09289	0.354455
0.8275		28.4251	38.7429				3.06051			5.34189	4.78546	5.06368	0.393462
0.827917		28.449	38.765				3.08249			5.34777	4.86706	5.10741	0.339907
0.828333		28.5192	38.7809				3.07546			5.34829	4.80579	5.07704	0.383608
0.82875		28.5073	38.7394				3.08571			5.3437	4.83375	5.08873	0.360591
0.829167		28.5209	38.7398				3.09321			5.34966	4.85257	5.10112	0.351496
0.829583		28.5488	38.7862				3.05537			5.35143	4.81814	5.08479	0.377098
0.83		28.4789	38.7849				3.03204			5.35483	4.86023	5.10753	0.349734
0.830417		28.5102	38.7843				3.00823			5.35194	4.92399	5.13796	0.302609
0.830833		28.4373	38.8891				3.05322			5.35457	4.88819	5.12138	0.329781
0.83125		28.4511	38.8997				3.07854			5.35812	4.85063	5.10437	0.358856
0.831667		28.4479	38.938				3.06499			5.36063	4.88265	5.12164	0.337984
0.832083		28.4467	38.8929				3.08408			5.35799	4.89113	5.12456	0.330121
[truncated: 8,262 more rows]

## Sheet: Panel C
Metabolite production by L. plantarum in kale juice medium.
Sample 0		mM	mM	mM	mM				TOTAL METABOLITS																					TOTAL
Dilution	Bioreactor	Lactate	Formic	Acetate	Ethanol	Succinate				ON+DHNA WT										METABOLITES PRODUCTION PER CELL										Mm/CELL
3	1.wt+DHNA	0.0998568	5.3285	0.6069	0	0.472757			Day	Lactic	Formic	Acet	Ethanol	Succinate	stdv	stdv	stdv	stdv	stdv	Lactate/cell	std	acetate/cell	std	formic/cell	std	ethanol/cell	std	succinate/cells	std	Sum	STDV
3	2.wt+DHNA	0.0998568	5.3285	0.6069	0	0.472757			1.79167	57.9831	0.245094	12.8547	1.32019	1.82217	1.95593	0.21235	1.03232	1.71417	0.0798902	106.53	31.8796	22.481	7.3648	0.451094	0.46265	6.41953	3.24831	2.91864	0.882678	138.8	43.838
3	3.wt+DHNA	0.0998568	5.3285	0.6069	0	0.472757				OC+DHNA
3	7.OCP+DHNA	0.0998568	5.3285	0.6069	0	0.472757				Lactic	Formic	Acet	Ethanol	Succinate	stdv	stdv	stdv	stdv	stdv	Lactate/cell	std	acetate/cell	std	formic/cell	std	ethanol/cell	std	succinate/cells	std	Sum	STDV
3	8.OCP+DHNA	0.0998568	5.3285	0.6069	0	0.472757			1.79167	48.6666	0.197661	9.40779	0.392408	2.17211	0.839905	0.102534	0.455954	0.270902	1.13324	64.7555	14.6531	11.677	2.66352	0	0	3.32076	2.79807	2.57614	1.465	82.3295	21.5797
3	9.OCP+DHNA	0.0998568	5.3285	0.6069	0	0.472757				POL NODHNA
3	10.abiotic	0.0998568	5.3285	0.6069	0	0.472757				Lactic	Formic	Acet	Ethanol	Succinate	stdv	stdv	stdv	stdv	stdv	Lactate/cell	std	acetate/cell	std	formic/cell	std	ethanol/cell	std	succinate/cells	std	Sum	STDV
3	11.WT	0.0998568	5.3285	0.6069	0	0.472757			1.79167	49.3964	0.651405	9.90125	2.26679	2.44549	6.69475	0.0377697	1.64731	2.48508	0.331143	58.4542	4.06164	10.9699	1.97785	0	0	2.68789	2.95265	2.66215	0.405165	74.7742	9.3973
3	12.WT	0.0998568	5.3285	0.6069	0	0.472757				ABIOTIC + DHNA
										Lactic	Formic	Acet	Ethanol	Succinate	stdv	stdv	stdv	stdv	stdv	Lactate/cell	std	acetate/cell	std	formic/cell	std	ethanol/cell	std	succinate/cells	std	Sum
Sample 1									1.79167	0.0956075	6.33211	0.653149	0	0.567185	0	0	0	0	0	#DIV/0!	#DIV/0!	#DIV/0!	#DIV/0!	#DIV/0!	#DIV/0!	#DIV/0!	#DIV/0!	#DIV/0!	#DIV/0!	#DIV/0!
Dilution	Bioreactor	Lactate	Formic	Acetate	Ethanol	Succinate
3	1.wt+DHNA	46.8365	3.72774	2.58531	5	0.338439
3	2.wt+DHNA	55.4866	5.61427	2.83469	3.28946	0.348681
3	3.wt+DHNA	47.8561	4.60854	2.58232	2.17436	0.300663
3	7.OCP+DHNA	44.1304	3.86044	2.83366	1.46855	0.917397
3	8.OCP+DHNA	51.2704	3.68851	4.35713	5.01621	1.2768
3	9.OCP+DHNA	45.6308	3.63134	3.37754	1.28695	1.07534
3	10.abiotic	0.0905995	6.62756	0.655811	8.87472	0.597802
3	11.WT	45.8912	2.98286	4.38319	2.69641	1.04703
3	12.WT	49.8925	2.80613	6.27046	0.994211	1.56584
Sample 3
Dilution	Bioreactor	Lactate	Formic	Acetate	Ethanol	Succinate
3	1.wt+DHNA	56.8738	0.373901	11.6793	3.29759	1.73005
3	2.wt+DHNA	60.2415	0.361382	13.2702	0.407659	1.87236
3	3.wt+DHNA	56.8341	0	13.6144	0.255329	1.86411
3	8.OCP+DHNA	49.3915	0.24412	9.7784	0.320381	2.81594
3	9.OCP+DHNA	47.7462	0.268741	9.54632	0.164798	2.81594
3	9.OCP+DHNA	49.3915	0.24412	9.7784	0.320381	2.83677
3	10.abiotic	47.3446	0.27208	9.47352	4.85667	2.82244
3	11.WT	0.0956075	6.33211	0.653149	0	0.567185
3	12.WT	44.6625	0.678113	8.73643	4.02401	2.21134
		54.1303	0.624698	11.0661	0.509574	2.67965
SAMPLE 4
Dilution	Bioreactor	Lactate	Formic	Acetate	Ethanol	Succinate
3	1.wt+DHNA	46.4806	0	12.029	2.70562	1.54127
3	2.wt+DHNA	59.7404	0	16.0207	0.209251	2.01269
3	3.wt+DHNA	50.8013	0	15.4602	0.645099	1.80823
3	7.OCP+DHNA	48.4489	0	9.85433	8.61896	2.87767
3	8.OCP+DHNA	50.8538	0	9.94384	3.99994	2.98519
3	9.OCP+DHNA	46.3754	0	9.40179	0.795803	2.81728
3	10.abiotic	1.71314	0	1.14126	0.359412	0.56322
3	11.WT	44.0105	0	8.59462	3.78315	2.18496
3	12.WT	53.5332	0	10.877	0.523127	2.67622

## Sheet: Panel D
pH in bioreactors with L. plantarum in kale juice medium.
	pH
			WT+DHNA					OCP					WT
	Sample	day	1	2	3	average	std	7	8	9	average	std	11	12	average	std	Abiotic
	0	0				5.47					5.47				5.47		5.47
	1	0.625	4.13	4.17	4.17	4.15667	0.023094	4.26	4.26	4.27	4.26333	0.0057735	4.24	4.26	4.25	0.0141421
	2	1	4.23	4.18	4.14	4.18333	0.0450925	4.35	4.27	4.34	4.32	0.043589	4.34	4.31	4.325	0.0212132	5.48
	3	1.79167	4.09	3.97	3.9	3.98667	0.0960902	4.38	4.38	4.4	4.38667	0.011547	4.31	4.3	4.305	0.00707107	5.44
	4	3.66667	4.08	3.97	3.88	3.97667	0.100167	4.42	4.43	4.45	4.43333	0.0152753	4.39	4.35	4.37	0.0282843	5.45
	5	4.7	4.04	3.96	3.82	3.94	0.111355
	6	5.7	3.96	3.89	3.79	3.88	0.08544	4.5	4.46	4.47	4.47667	0.0208167	4.36	4.36	4.36	0

## Sheet: Panel E
Metabolite production by L. plantarum in kale juice medium.
	TOTAL METABOLITES											RATES PRODUCTION PER CELL
		ON WT+DHNA										fmol/cell/day
	Day	Lactic	Formic	Acet	Ethanol	Succinate	stdv	stdv	stdv	stdv	stdv	Lactate/cell	std	acetate/cell	std	Succin	std	ethanol/cell	std	Form	std			CFU
	1.8	57.9831	0.245094	12.8547	1.32019	1.82217	1.95593	0.21235	1.03232	1.71417	0.0798902	59.4473	9.92742	12.5375	2.16763	1.61385	0.825497	0	0	-8.0336	-0.35222			5.43333e+08
																								750000000
																								6.16667e+08
		OCP+DHNA										Lactate/cell	std	acetate/cell	std	Succin	std	ethanol/cell	std	Form	std			6.16667e+08
	Day	Lactic	Formic	Acet	Ethanol	Succinate	stdv	stdv	stdv	stdv	stdv	36.1344	4.56285	6.51808	0.841699	1.44027	0.457061	0	#REF!	-5.55765	-3.16052
	1.8	48.6666	0.197661	9.40779	0.392408	2.17211	0.839905	0.102534	0.455954	0.270902	1.13324
		ON WT
	Day	Lactic	Formic	Acet	Ethanol	Succinate	stdv	stdv	stdv	stdv	stdv	Lactate/cell	std	acetate/cell	std	Succin	std	ethanol/cell	std	Form	std
	1.8	49.3964	0.651405	9.90125	2.26679	2.44549	6.69475	0.0377697	1.64731	2.48508	0.331143	38.2056	3.98381	4.1395	0.577937	1.03076	0.107846	3.34171	#DIV/0!	-3.63745	-0.839383
